# Supplementary material for: Selenium(IV) Polybromide Complexes: Structural Diversity Driven by Halogen and Chalcogen Bonding
Source: MDPI journal article supplement (doi:10.3390/molecules27165355), 2022-08-22

## checkCIF/PLATON report

Structure factors have been supplied for datablock(s) 2

THIS REPORT IS FOR GUIDANCE ONLY. IF USED AS PART OF A REVIEW PROCEDURE FOR PUBLICATION, IT SHOULD NOT REPLACE THE EXPERTISE OF AN EXPERIENCED CRYSTALLOGRAPHIC REFEREE.

No syntax errors found.      CIF dictionary      Interpreting this report

### Datablock: 2

---

|                        |                             |                                  |                            |
|------------------------|-----------------------------|----------------------------------|----------------------------|
| Bond precision:        | C-C = 0.0174 Å              | Wavelength=0.71073               |                            |
| Cell:                  | a=17.7961 (15)<br>alpha=90  | b=7.4754 (6)<br>beta=100.133 (5) | c=17.6525 (17)<br>gamma=90 |
| Temperature:           | 150 K                       |                                  |                            |
|                        | Calculated                  | Reported                         |                            |
| Volume                 | 2311.7 (4)                  | 2311.7 (4)                       |                            |
| Space group            | C 2/c                       | C 2/c                            |                            |
| Hall group             | -C 2yc                      | -C 2yc                           |                            |
| Moiety formula         | Br6 Se, 2 (C6 H8 N), 2 (Br) | ?                                |                            |
| Sum formula            | C12 H16 Br8 N2 Se           | C12 H16 Br8 N2 Se                |                            |
| Mr                     | 906.43                      | 906.51                           |                            |
| Dx, g cm <sup>-3</sup> | 2.604                       | 2.605                            |                            |
| Z                      | 4                           | 4                                |                            |
| Mu (mm <sup>-1</sup> ) | 15.451                      | 15.451                           |                            |
| F000                   | 1664.0                      | 1664.0                           |                            |
| F000'                  | 1656.53                     |                                  |                            |
| h, k, lmax             | 22, 9, 22                   | 22, 9, 22                        |                            |
| Nref                   | 2564                        | 2561                             |                            |
| Tmin, Tmax             | 0.236, 0.291                | 0.540, 0.746                     |                            |
| Tmin'                  | 0.205                       |                                  |                            |

Correction method= # Reported T Limits: Tmin=0.540 Tmax=0.746  
AbsCorr = MULTI-SCAN

Data completeness= 0.999      Theta (max)= 27.140

|                                |                                  |
|--------------------------------|----------------------------------|
| R(reflections)= 0.0464 ( 1919) | wR2(reflections)= 0.1250 ( 2561) |
| S = 1.093                      | Npar= 124                        |

---

The following ALERTS were generated. Each ALERT has the format

**test-name\_ALERT\_alert-type\_alert-level.**

Click on the hyperlinks for more details of the test.

---

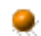

#### Alert level B

|                   |                         |           |       |   |             |
|-------------------|-------------------------|-----------|-------|---|-------------|
| PLAT230_ALERT_2_B | Hirshfeld Test Diff for | Br1       | --Sel | . | 10.1 s.u.   |
| PLAT230_ALERT_2_B | Hirshfeld Test Diff for | Br2       | --Sel | . | 17.1 s.u.   |
| PLAT341_ALERT_3_B | Low Bond Precision on   | C-C Bonds | ..... |   | 0.0174 Ang. |

---

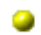

#### Alert level C

|                   |         |               |                                         |       |        |
|-------------------|---------|---------------|-----------------------------------------|-------|--------|
| PLAT242_ALERT_2_C | Low     | 'MainMol'     | Ueq as Compared to Neighbors of         | N1    | Check  |
| PLAT250_ALERT_2_C | Large   | U3/U1         | Ratio for Average U(i,j) Tensor ....    | 2.8   | Note   |
| PLAT362_ALERT_2_C | Short   | C(sp3)-C(sp2) | Bond C7 - C8                            | 1.38  | Ang.   |
| PLAT906_ALERT_3_C | Large   | K             | Value in the Analysis of Variance ..... | 5.753 | Check  |
| PLAT911_ALERT_3_C | Missing | FCF Refl      | Between Thmin & STh/L= 0.600            | 3     | Report |

---

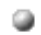

#### Alert level G

|                   |                                |                                          |       |              |
|-------------------|--------------------------------|------------------------------------------|-------|--------------|
| PLAT003_ALERT_2_G | Number of Uiso or Uij          | Restrained non-H Atoms ...               | 6     | Report       |
| PLAT007_ALERT_5_G | Number of Unrefined            | Donor-H Atoms .....                      | 1     | Report       |
| PLAT083_ALERT_2_G | SHELXL                         | Second Parameter in WGHT Unusually Large | 18.29 | Why ?        |
| PLAT178_ALERT_4_G | The CIF-Embedded .res          | File Contains SIMU Records               | 1     | Report       |
| PLAT230_ALERT_2_G | Hirshfeld Test Diff for        | Br5A --Sel                               | 20.9  | s.u.         |
| PLAT230_ALERT_2_G | Hirshfeld Test Diff for        | Br5B --Sel                               | 22.2  | s.u.         |
| PLAT300_ALERT_4_G | Atom Site Occupancy of         | Br5A Constrained at                      | 0.5   | Check        |
| PLAT300_ALERT_4_G | Atom Site Occupancy of         | Br5B Constrained at                      | 0.5   | Check        |
| PLAT300_ALERT_4_G | Atom Site Occupancy of         | Br7 Constrained at                       | 0.5   | Check        |
| PLAT300_ALERT_4_G | Atom Site Occupancy of         | Br8 Constrained at                       | 0.5   | Check        |
| PLAT301_ALERT_3_G | Main Residue Disorder          | .....(Resd 1 )                           | 29%   | Note         |
| PLAT302_ALERT_4_G | Anion/Solvent/Minor-Residue    | Disorder (Resd 3 )                       | 100%  | Note         |
| PLAT302_ALERT_4_G | Anion/Solvent/Minor-Residue    | Disorder (Resd 4 )                       | 100%  | Note         |
| PLAT304_ALERT_4_G | Non-Integer Number of Atoms in | ..... (Resd 3 )                          | 0.50  | Check        |
| PLAT304_ALERT_4_G | Non-Integer Number of Atoms in | ..... (Resd 4 )                          | 0.50  | Check        |
| PLAT434_ALERT_2_G | Short Inter HL..HL Contact     | Br1 ..Br8                                | 3.10  | Ang.         |
|                   |                                | x,y,z =                                  | 1_555 | Check        |
| PLAT434_ALERT_2_G | Short Inter HL..HL Contact     | Br2 ..Br7                                | 3.29  | Ang.         |
|                   |                                | 1/2-x,-1/2+y,1/2-z =                     | 4_545 | Check        |
| PLAT764_ALERT_4_G | Overcomplete CIF Bond List     | Detected (Rep/Expd)                      | 1.33  | Ratio        |
| PLAT779_ALERT_4_G | Suspect or Irrelevant (Bond)   | Angle(s) in CIF ...                      | 11.82 | Deg.         |
|                   | BR5B -SE1 -BR5A                | 2_555 1_555 2_555 .....                  | #     | 9 Check      |
| PLAT779_ALERT_4_G | Suspect or Irrelevant (Bond)   | Angle(s) in CIF ...                      | 11.82 | Deg.         |
|                   | BR5B -SE1 -BR5A                | 1_555 1_555 1_555 .....                  | #     | 14 Check     |
| PLAT779_ALERT_4_G | Suspect or Irrelevant (Bond)   | Angle(s) in CIF ...                      | 42.74 | Deg.         |
|                   | BR8 -BR7 -BR7                  | 1_555 1_555 7_565 .....                  | #     | 57 Check     |
| PLAT779_ALERT_4_G | Suspect or Irrelevant (Bond)   | Angle(s) in CIF ...                      | 43.25 | Deg.         |
|                   | BR7 -BR8 -BR8                  | 1_555 1_555 7_565 .....                  | #     | 60 Check     |
| PLAT860_ALERT_3_G | Number of Least-Squares        | Restraints .....                         | 36    | Note         |
| PLAT883_ALERT_1_G | No Info/Value for              | _atom_sites_solution_primary             |       | Please Do !  |
| PLAT912_ALERT_4_G | Missing # of FCF Reflections   | Above STh/L= 0.600                       | 1     | Note         |
| PLAT913_ALERT_3_G | Missing # of Very Strong       | Reflections in FCF ....                  | 2     | Note         |
| PLAT933_ALERT_2_G | Number of HKL-OMIT             | Records in Embedded .res File            | 2     | Note         |
| PLAT961_ALERT_5_G | Dataset Contains no            | Negative Intensities .....               |       | Please Check |
| PLAT965_ALERT_2_G | The SHELXL WEIGHT              | Optimisation has not Converged           |       | Please Check |

---

|    |                      |                                                              |
|----|----------------------|--------------------------------------------------------------|
| 0  | <b>ALERT level A</b> | = Most likely a serious problem - resolve or explain         |
| 3  | <b>ALERT level B</b> | = A potentially serious problem, consider carefully          |
| 5  | <b>ALERT level C</b> | = Check. Ensure it is not caused by an omission or oversight |
| 30 | <b>ALERT level G</b> | = General information/check it is not something unexpected   |

  

|    |              |                                                              |
|----|--------------|--------------------------------------------------------------|
| 1  | ALERT type 1 | CIF construction/syntax error, inconsistent or missing data  |
| 14 | ALERT type 2 | Indicator that the structure model may be wrong or deficient |
| 6  | ALERT type 3 | Indicator that the structure quality may be low              |
| 15 | ALERT type 4 | Improvement, methodology, query or suggestion                |
| 2  | ALERT type 5 | Informative message, check                                   |

---

It is advisable to attempt to resolve as many as possible of the alerts in all categories. Often the minor alerts point to easily fixed oversights, errors and omissions in your CIF or refinement strategy, so attention to these fine details can be worthwhile. In order to resolve some of the more serious problems it may be necessary to carry out additional measurements or structure refinements. However, the purpose of your study may justify the reported deviations and the more serious of these should normally be commented upon in the discussion or experimental section of a paper or in the "special\_details" fields of the CIF. checkCIF was carefully designed to identify outliers and unusual parameters, but every test has its limitations and alerts that are not important in a particular case may appear. Conversely, the absence of alerts does not guarantee there are no aspects of the results needing attention. It is up to the individual to critically assess their own results and, if necessary, seek expert advice.

### Publication of your CIF in IUCr journals

A basic structural check has been run on your CIF. These basic checks will be run on all CIFs submitted for publication in IUCr journals (*Acta Crystallographica*, *Journal of Applied Crystallography*, *Journal of Synchrotron Radiation*); however, if you intend to submit to *Acta Crystallographica Section C* or *E* or *IUCrData*, you should make sure that full publication checks are run on the final version of your CIF prior to submission.

### Publication of your CIF in other journals

Please refer to the *Notes for Authors* of the relevant journal for any special instructions relating to CIF submission.

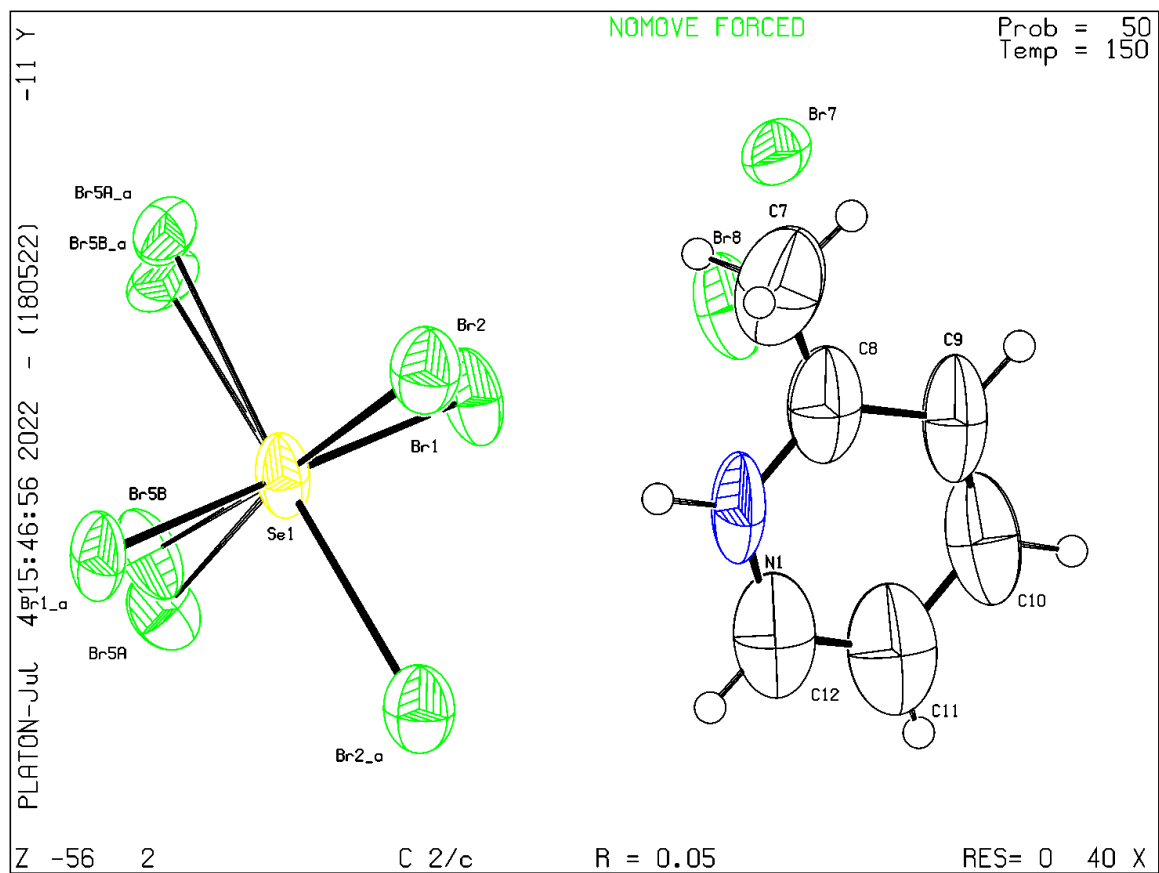

Supplement: s1 [file s1]
