# Supplementary material for: Selenium(IV) Polybromide Complexes: Structural Diversity Driven by Halogen and Chalcogen Bonding
Source: MDPI journal article supplement (doi:10.3390/molecules27165355), 2022-08-22

---

The following ALERTS were generated. Each ALERT has the format  
**test-name\_ALERT\_alert-type\_alert-level.**

Click on the hyperlinks for more details of the test.

---

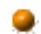

#### Alert level B

|                   |                                        |             |
|-------------------|----------------------------------------|-------------|
| PLAT341_ALERT_3_B | Low Bond Precision on C-C Bonds .....  | 0.0163 Ang. |
| PLAT434_ALERT_2_B | Short Inter HL..HL Contact Br6 ..Br7 . | 3.16 Ang.   |
|                   | x,y,z =                                | 1_555 Check |

---

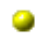

#### Alert level C

|                   |                                                 |              |
|-------------------|-------------------------------------------------|--------------|
| PLAT790_ALERT_4_C | Centre of Gravity not Within Unit Cell: Resd. # | 1 Note       |
|                   | Br9 Se2                                         |              |
| PLAT906_ALERT_3_C | Large K Value in the Analysis of Variance ..... | 12.264 Check |
| PLAT906_ALERT_3_C | Large K Value in the Analysis of Variance ..... | 2.701 Check  |
| PLAT911_ALERT_3_C | Missing FCF Refl Between Thmin & STh/L= 0.600   | 2 Report     |
| PLAT972_ALERT_2_C | Check Calcd Resid. Dens. 0.96Ang From Br11      | -1.74 eA-3   |
| PLAT977_ALERT_2_C | Check Negative Difference Density on H3 .       | -0.42 eA-3   |
| PLAT977_ALERT_2_C | Check Negative Difference Density on H8 .       | -0.47 eA-3   |
| PLAT977_ALERT_2_C | Check Negative Difference Density on H9A .      | -0.63 eA-3   |

---

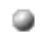

#### Alert level G

|                   |                                                  |              |
|-------------------|--------------------------------------------------|--------------|
| PLAT003_ALERT_2_G | Number of Uiso or Uij Restrained non-H Atoms ... | 3 Report     |
| PLAT007_ALERT_5_G | Number of Unrefined Donor-H Atoms .....          | 3 Report     |
| PLAT083_ALERT_2_G | SHELXL Second Parameter in WGHT Unusually Large  | 216.77 Why ? |
| PLAT178_ALERT_4_G | The CIF-Embedded .res File Contains SIMU Records | 1 Report     |
| PLAT300_ALERT_4_G | Atom Site Occupancy of N3 Constrained at         | 0.5 Check    |
| PLAT300_ALERT_4_G | Atom Site Occupancy of C13 Constrained at        | 0.5 Check    |
| PLAT300_ALERT_4_G | Atom Site Occupancy of C14 Constrained at        | 0.5 Check    |
| PLAT300_ALERT_4_G | Atom Site Occupancy of C15 Constrained at        | 0.5 Check    |
| PLAT300_ALERT_4_G | Atom Site Occupancy of C16 Constrained at        | 0.5 Check    |
| PLAT300_ALERT_4_G | Atom Site Occupancy of C17 Constrained at        | 0.5 Check    |
| PLAT300_ALERT_4_G | Atom Site Occupancy of C18 Constrained at        | 0.5 Check    |
| PLAT300_ALERT_4_G | Atom Site Occupancy of H3 Constrained at         | 0.5 Check    |
| PLAT300_ALERT_4_G | Atom Site Occupancy of H13 Constrained at        | 0.5 Check    |
| PLAT300_ALERT_4_G | Atom Site Occupancy of H14 Constrained at        | 0.5 Check    |
| PLAT300_ALERT_4_G | Atom Site Occupancy of H16 Constrained at        | 0.5 Check    |
| PLAT300_ALERT_4_G | Atom Site Occupancy of H17 Constrained at        | 0.5 Check    |
| PLAT300_ALERT_4_G | Atom Site Occupancy of H18A Constrained at       | 0.5 Check    |
| PLAT300_ALERT_4_G | Atom Site Occupancy of H18B Constrained at       | 0.5 Check    |
| PLAT300_ALERT_4_G | Atom Site Occupancy of H18C Constrained at       | 0.5 Check    |
| PLAT302_ALERT_4_G | Anion/Solvent/Minor-Residue Disorder (Resd 5 )   | 100% Note    |
| PLAT304_ALERT_4_G | Non-Integer Number of Atoms in ..... (Resd 5 )   | 7.50 Check   |
| PLAT434_ALERT_2_G | Short Inter HL..HL Contact Br2 ..Br4 .           | 3.43 Ang.    |
|                   | x,y,z =                                          | 1_555 Check  |
| PLAT434_ALERT_2_G | Short Inter HL..HL Contact Br5 ..Br8 .           | 3.47 Ang.    |
|                   | 1/2+x,1/2+y,z =                                  | 3_555 Check  |
| PLAT789_ALERT_4_G | Atoms with Negative _atom_site_disorder_group #  | 15 Check     |
| PLAT860_ALERT_3_G | Number of Least-Squares Restraints .....         | 12 Note      |
| PLAT883_ALERT_1_G | No Info/Value for _atom_sites_solution_primary . | Please Do !  |
| PLAT910_ALERT_3_G | Missing # of FCF Reflection(s) Below Theta(Min). | 1 Note       |
| PLAT912_ALERT_4_G | Missing # of FCF Reflections Above STh/L= 0.600  | 14 Note      |
| PLAT913_ALERT_3_G | Missing # of Very Strong Reflections in FCF .... | 1 Note       |

|                   |                                                  |   |              |
|-------------------|--------------------------------------------------|---|--------------|
| PLAT933_ALERT_2_G | Number of HKL-OMIT Records in Embedded .res File | 1 | Note         |
| PLAT961_ALERT_5_G | Dataset Contains no Negative Intensities .....   |   | Please Check |
| PLAT965_ALERT_2_G | The SHELXL WEIGHT Optimisation has not Converged |   | Please Check |
| PLAT978_ALERT_2_G | Number C-C Bonds with Positive Residual Density. | 0 | Info         |

---

0 **ALERT level A** = Most likely a serious problem - resolve or explain  
 2 **ALERT level B** = A potentially serious problem, consider carefully  
 8 **ALERT level C** = Check. Ensure it is not caused by an omission or oversight  
 33 **ALERT level G** = General information/check it is not something unexpected

1 ALERT type 1 CIF construction/syntax error, inconsistent or missing data  
 12 ALERT type 2 Indicator that the structure model may be wrong or deficient  
 7 ALERT type 3 Indicator that the structure quality may be low  
 21 ALERT type 4 Improvement, methodology, query or suggestion  
 2 ALERT type 5 Informative message, check

---

It is advisable to attempt to resolve as many as possible of the alerts in all categories. Often the minor alerts point to easily fixed oversights, errors and omissions in your CIF or refinement strategy, so attention to these fine details can be worthwhile. In order to resolve some of the more serious problems it may be necessary to carry out additional measurements or structure refinements. However, the purpose of your study may justify the reported deviations and the more serious of these should normally be commented upon in the discussion or experimental section of a paper or in the "special\_details" fields of the CIF. checkCIF was carefully designed to identify outliers and unusual parameters, but every test has its limitations and alerts that are not important in a particular case may appear. Conversely, the absence of alerts does not guarantee there are no aspects of the results needing attention. It is up to the individual to critically assess their own results and, if necessary, seek expert advice.

### Publication of your CIF in IUCr journals

A basic structural check has been run on your CIF. These basic checks will be run on all CIFs submitted for publication in IUCr journals (*Acta Crystallographica*, *Journal of Applied Crystallography*, *Journal of Synchrotron Radiation*); however, if you intend to submit to *Acta Crystallographica Section C* or *E* or *IUCrData*, you should make sure that full publication checks are run on the final version of your CIF prior to submission.

### Publication of your CIF in other journals

Please refer to the *Notes for Authors* of the relevant journal for any special instructions relating to CIF submission.

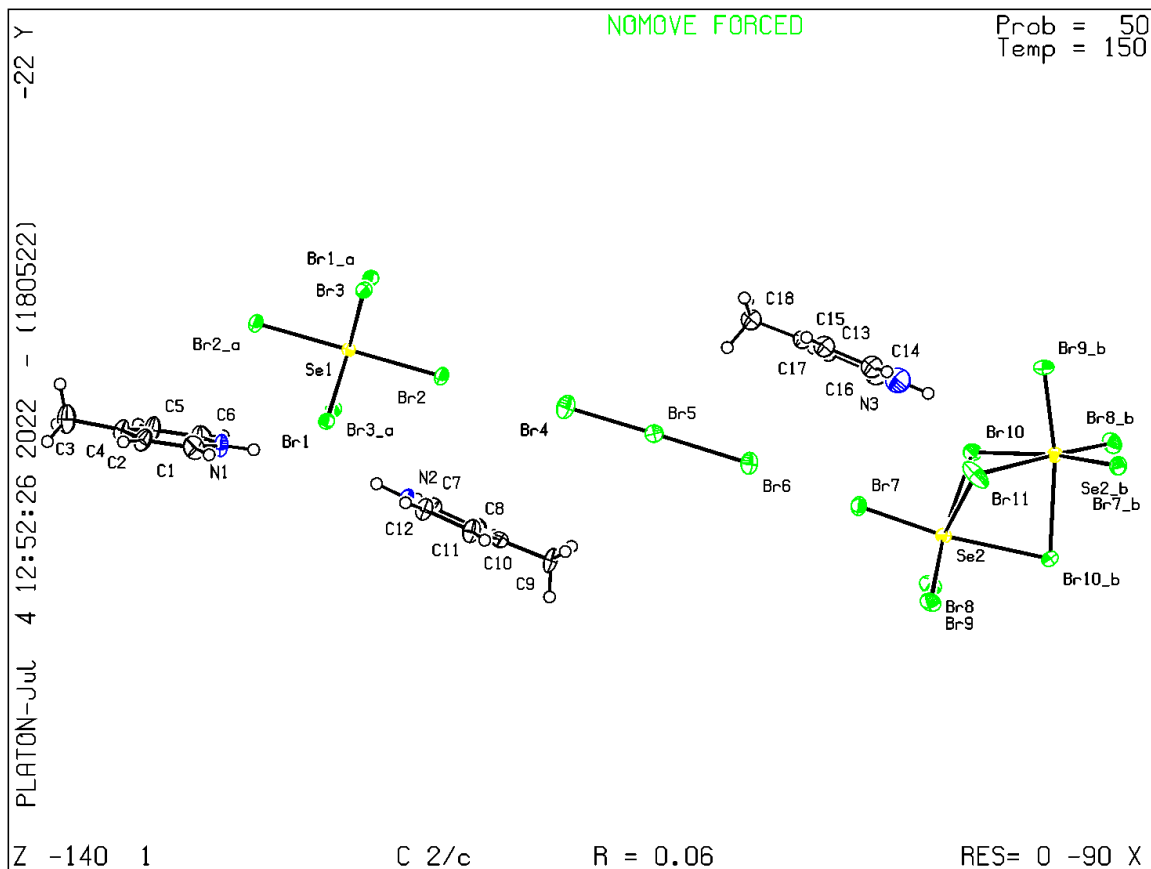

Supplement: s1 [file s1]
