# Supplementary material for: Selenium(IV) Polybromide Complexes: Structural Diversity Driven by Halogen and Chalcogen Bonding
Source: Molecules. 2022 Aug 22;27(16):5355. doi: 10.3390/molecules27165355 (PMC9415170; doi:10.3390/molecules27165355)
Supplement: Supplementary file 1 [file molecules-27-05355-s001.zip]

Archive with 9 entries (9 files):
- 1.cif
- 2.cif
- 3.cif
- 4.cif
- checkcif 1.pdf
- checkcif 2.pdf
- checkcif 3.pdf
- checkcif4.pdf
- SI 04.07.docx
