# Supplementary material for: Selenium(IV) Polybromide Complexes: Structural Diversity Driven by Halogen and Chalcogen Bonding
Source: Molecules. 2022 Aug 22;27(16):5355. doi: 10.3390/molecules27165355 (PMC9415170; doi:10.3390/molecules27165355)
Supplement: Supplementary file 1 [file molecules-27-05355-s001.zip › 1.cif]

 
data_1

_audit_creation_method           SHELXL-2017/1
_shelx_SHELXL_version_number     2017/1
_chemical_name_systematic        ?
_chemical_name_common            ?
_chemical_melting_point          ?
_chemical_formula_moiety         ?
_chemical_formula_sum            'C30 H40 Br21 N5 Se3'
_chemical_formula_weight         2385.66

loop_
_atom_type_symbol
_atom_type_description
_atom_type_scat_dispersion_real
_atom_type_scat_dispersion_imag
_atom_type_scat_source
C C 0.0033 0.0016 'International Tables Vol C Tables 4.2.6.8 and 6.1.1.4'
H H 0.0000 0.0000 'International Tables Vol C Tables 4.2.6.8 and 6.1.1.4'
N N 0.0061 0.0033 'International Tables Vol C Tables 4.2.6.8 and 6.1.1.4'
Se Se -0.0929 2.2259 'International Tables Vol C Tables 4.2.6.8 and 6.1.1.4'
Br Br -0.2901 2.4595 'International Tables Vol C Tables 4.2.6.8 and 6.1.1.4'

_space_group_crystal_system      monoclinic
_space_group_IT_number           15
_space_group_name_H-M_alt        'C 2/c'
_space_group_name_Hall           '-C 2yc'

_shelx_space_group_comment       
;
The symmetry employed for this shelxl refinement is uniquely defined
by the following loop, which should always be used as a source of
symmetry information in preference to the above space-group names.
They are only intended as comments.
;

loop_
_space_group_symop_operation_xyz
'x, y, z'
'-x, y, -z+1/2'
'x+1/2, y+1/2, z'
'-x+1/2, y+1/2, -z+1/2'
'-x, -y, -z'
'x, -y, z-1/2'
'-x+1/2, -y+1/2, -z'
'x+1/2, -y+1/2, z-1/2'

_cell_length_a                   11.0372(9)
_cell_length_b                   16.0823(12)
_cell_length_c                   33.061(3)
_cell_angle_alpha                90
_cell_angle_beta                 94.534(3)
_cell_angle_gamma                90
_cell_volume                     5850.1(8)
_cell_formula_units_Z            4
_cell_measurement_temperature    150(2)
_cell_measurement_reflns_used    8427
_cell_measurement_theta_min      2.2872
_cell_measurement_theta_max      27.6587

_exptl_crystal_description       prism
_exptl_crystal_colour            dark-red
_exptl_crystal_density_meas      ?
_exptl_crystal_density_method    ?
_exptl_crystal_density_diffrn    2.709
_exptl_crystal_F_000             4368
_exptl_transmission_factor_min   ?
_exptl_transmission_factor_max   ?
_exptl_crystal_size_max          0.090
_exptl_crystal_size_mid          0.070
_exptl_crystal_size_min          0.040
_exptl_absorpt_coefficient_mu    16.259
_shelx_estimated_absorpt_T_min   0.322
_shelx_estimated_absorpt_T_max   0.562
_exptl_absorpt_correction_type   multi-scan
_exptl_absorpt_correction_T_min  0.4519
_exptl_absorpt_correction_T_max  0.7456
_exptl_absorpt_process_details   
;
 SADABS 2016/2: Krause, L., Herbst-Irmer, R., Sheldrick G.M. & Stalke D.,
 J. Appl. Cryst. 48 (2015) 3-10
;
_exptl_absorpt_special_details   ?
_diffrn_ambient_temperature      150(2)
_diffrn_radiation_wavelength     0.71073
_diffrn_radiation_type           MoK\a
_diffrn_source                   'Incoatec IuS3.0 microfocus X-ray tube'
_diffrn_measurement_device_type  'Bruker D8 Venture diffractometer'
_diffrn_measurement_method       '\w and \f scans'
_diffrn_detector_area_resol_mean 7.41
_diffrn_reflns_number            44440
_diffrn_reflns_av_unetI/netI     0.0480
_diffrn_reflns_av_R_equivalents  0.0700
_diffrn_reflns_limit_h_min       -13
_diffrn_reflns_limit_h_max       14
_diffrn_reflns_limit_k_min       -21
_diffrn_reflns_limit_k_max       21
_diffrn_reflns_limit_l_min       -43
_diffrn_reflns_limit_l_max       43
_diffrn_reflns_theta_min         2.243
_diffrn_reflns_theta_max         27.905
_diffrn_reflns_theta_full        25.500
_diffrn_measured_fraction_theta_max 0.998
_diffrn_measured_fraction_theta_full 0.999
_diffrn_reflns_Laue_measured_fraction_max 0.998
_diffrn_reflns_Laue_measured_fraction_full 0.999
_diffrn_reflns_point_group_measured_fraction_max 0.998
_diffrn_reflns_point_group_measured_fraction_full 0.999
_reflns_number_total             6980
_reflns_number_gt                5748
_reflns_threshold_expression     'I > 2\s(I)'
_reflns_Friedel_coverage         0.000
_reflns_Friedel_fraction_max     .
_reflns_Friedel_fraction_full    .

_reflns_special_details          
;
 Reflections were merged by SHELXL according to the crystal
 class for the calculation of statistics and refinement.
 
 _reflns_Friedel_fraction is defined as the number of unique
 Friedel pairs measured divided by the number that would be
 possible theoretically, ignoring centric projections and
 systematic absences.
;
_computing_data_collection       'APEX3 (Bruker-AXS, 2016)'
_computing_cell_refinement       'SAINT (Bruker-AXS, 2016)'
_computing_data_reduction        'SAINT (Bruker-AXS, 2016)'
_computing_structure_solution    'SHELXT 2014/5 (Sheldrick, 2014)'
_computing_structure_refinement  'SHELXL-2017/1 (Sheldrick, 2017)'
_computing_molecular_graphics    ?
_computing_publication_material  ?
_refine_special_details          ?
_refine_ls_structure_factor_coef Fsqd
_refine_ls_matrix_type           full
_refine_ls_weighting_scheme      calc
_refine_ls_weighting_details     
'w=1/[\s^2^(Fo^2^)+(0.0358P)^2^+216.7656P] where P=(Fo^2^+2Fc^2^)/3'
_atom_sites_solution_primary     ?
_atom_sites_solution_secondary   ?
_atom_sites_solution_hydrogens   geom
_refine_ls_hydrogen_treatment    constr
_refine_ls_extinction_method     none
_refine_ls_extinction_coef       .
_refine_ls_number_reflns         6980
_refine_ls_number_parameters     253
_refine_ls_number_restraints     12
_refine_ls_R_factor_all          0.0791
_refine_ls_R_factor_gt           0.0625
_refine_ls_wR_factor_ref         0.1524
_refine_ls_wR_factor_gt          0.1482
_refine_ls_goodness_of_fit_ref   1.305
_refine_ls_restrained_S_all      1.305
_refine_ls_shift/su_max          0.001
_refine_ls_shift/su_mean         0.000

loop_
_atom_site_label
_atom_site_type_symbol
_atom_site_fract_x
_atom_site_fract_y
_atom_site_fract_z
_atom_site_U_iso_or_equiv
_atom_site_adp_type
_atom_site_occupancy
_atom_site_site_symmetry_order
_atom_site_calc_flag
_atom_site_refinement_flags_posn
_atom_site_refinement_flags_adp
_atom_site_refinement_flags_occupancy
_atom_site_disorder_assembly
_atom_site_disorder_group
C1 C 0.8123(11) 0.8308(8) 0.3582(4) 0.032(3) Uani 1 1 d . . . . .
H1 H 0.747879 0.868638 0.361717 0.039 Uiso 1 1 calc R U . . .
C2 C 0.9071(10) 0.8546(7) 0.3365(4) 0.027(2) Uani 1 1 d . U . . .
H2 H 0.908639 0.908598 0.324841 0.033 Uiso 1 1 calc R U . . .
C3 C 1.1105(12) 0.8202(8) 0.3098(4) 0.038(3) Uani 1 1 d . U . . .
H3A H 1.167451 0.852516 0.327785 0.057 Uiso 1 1 calc R U . . .
H3B H 1.085250 0.853362 0.285683 0.057 Uiso 1 1 calc R U . . .
H3C H 1.150224 0.769187 0.301502 0.057 Uiso 1 1 calc R U . . .
C4 C 1.0018(9) 0.7984(6) 0.3316(3) 0.018(2) Uani 1 1 d . U . . .
C5 C 0.9907(11) 0.7198(7) 0.3480(4) 0.028(3) Uani 1 1 d . . . . .
H5 H 1.051132 0.679179 0.344112 0.034 Uiso 1 1 calc R U . . .
C6 C 0.8954(12) 0.6998(8) 0.3696(4) 0.033(3) Uani 1 1 d . . . . .
H6 H 0.889909 0.646154 0.381284 0.040 Uiso 1 1 calc R U . . .
C7 C 0.3460(10) 0.6984(7) 0.4405(4) 0.024(2) Uani 1 1 d . . . . .
H7 H 0.358888 0.755462 0.434704 0.029 Uiso 1 1 calc R U . . .
C8 C 0.2347(10) 0.6700(7) 0.4517(4) 0.027(3) Uani 1 1 d . . . . .
H8 H 0.169743 0.708469 0.452847 0.032 Uiso 1 1 calc R U . . .
C9 C 0.0978(10) 0.5605(7) 0.4751(4) 0.029(3) Uani 1 1 d . . . . .
H9A H 0.058683 0.607097 0.488047 0.044 Uiso 1 1 calc R U . . .
H9B H 0.111874 0.515120 0.494737 0.044 Uiso 1 1 calc R U . . .
H9C H 0.044915 0.540840 0.451861 0.044 Uiso 1 1 calc R U . . .
C10 C 0.2151(10) 0.5881(7) 0.4611(3) 0.023(2) Uani 1 1 d . . . . .
C11 C 0.3120(11) 0.5320(7) 0.4569(4) 0.026(2) Uani 1 1 d . . . . .
H11 H 0.301601 0.474310 0.461693 0.032 Uiso 1 1 calc R U . . .
C12 C 0.4195(10) 0.5610(7) 0.4459(4) 0.026(2) Uani 1 1 d . . . . .
H12 H 0.484958 0.523465 0.443466 0.031 Uiso 1 1 calc R U . . .
N1 N 0.8099(9) 0.7563(6) 0.3741(3) 0.027(2) Uani 1 1 d . . . . .
H1A H 0.748861 0.743178 0.388459 0.032 Uiso 1 1 calc R U . . .
N2 N 0.4351(8) 0.6416(6) 0.4383(3) 0.023(2) Uani 1 1 d . . . . .
H2A H 0.506673 0.658465 0.431645 0.028 Uiso 1 1 calc R U . . .
Se1 Se 0.750000 0.750000 0.500000 0.0156(3) Uani 1 2 d S . P . .
Se2 Se -0.46958(9) 0.35282(6) 0.69587(3) 0.0168(2) Uani 1 1 d . . . . .
Br1 Br 0.61570(9) 0.82367(6) 0.44396(3) 0.0186(2) Uani 1 1 d . . . . .
Br2 Br 0.55962(9) 0.69565(7) 0.53210(3) 0.0210(2) Uani 1 1 d . . . . .
Br3 Br 0.75180(9) 0.88081(6) 0.54463(3) 0.0187(2) Uani 1 1 d . . . . .
Br4 Br 0.32459(11) 0.60512(7) 0.57805(4) 0.0297(3) Uani 1 1 d . . . . .
Br5 Br 0.14021(10) 0.55443(6) 0.60773(3) 0.0208(2) Uani 1 1 d . . . . .
Br6 Br -0.06242(10) 0.50325(7) 0.63906(4) 0.0262(3) Uani 1 1 d . . . . .
Br7 Br -0.29317(10) 0.41464(7) 0.66981(3) 0.0235(2) Uani 1 1 d . . . . .
Br8 Br -0.45994(12) 0.22715(7) 0.65859(4) 0.0281(3) Uani 1 1 d . . . . .
Br9 Br -0.60911(11) 0.42196(8) 0.64757(3) 0.0282(3) Uani 1 1 d . . . . .
Br10 Br -0.32926(10) 0.28429(7) 0.76286(3) 0.0233(2) Uani 1 1 d . . . . .
Br11 Br -0.500000 0.48842(10) 0.750000 0.0416(5) Uani 1 2 d S T P . .
C15 C 0.0587(10) 0.5132(8) 0.7436(5) 0.024(5) Uiso 0.5 1 d G . P A -1
C13 C 0.0360(12) 0.4291(8) 0.7490(5) 0.020(5) Uiso 0.5 1 d G . P A -1
H13 H 0.096848 0.389204 0.744352 0.024 Uiso 0.5 1 calc R U P A -1
C14 C -0.0756(13) 0.4033(7) 0.7613(6) 0.039(6) Uiso 0.5 1 d G . P A -1
H14 H -0.091027 0.345813 0.764981 0.046 Uiso 0.5 1 calc R U P A -1
N3 N -0.1645(11) 0.4617(9) 0.7682(5) 0.045(6) Uiso 0.5 1 d G . P A -1
H3 H -0.235200 0.445360 0.775912 0.054 Uiso 0.5 1 calc R U P A -1
C16 C -0.1419(12) 0.5458(8) 0.7628(6) 0.034(7) Uiso 0.5 1 d G . P A -1
H16 H -0.202740 0.585702 0.767448 0.041 Uiso 0.5 1 calc R U P A -1
C17 C -0.0303(13) 0.5716(7) 0.7505(6) 0.031(6) Uiso 0.5 1 d G . P A -1
H17 H -0.014866 0.629094 0.746819 0.037 Uiso 0.5 1 calc R U P A -1
C18 C 0.175(3) 0.5406(16) 0.7291(8) 0.030(5) Uiso 0.5 1 d . . P A -1
H18A H 0.239998 0.502637 0.739236 0.045 Uiso 0.5 1 calc R U P A -1
H18B H 0.193852 0.596987 0.738919 0.045 Uiso 0.5 1 calc R U P A -1
H18C H 0.168961 0.540385 0.699321 0.045 Uiso 0.5 1 calc R U P A -1

loop_
_atom_site_aniso_label
_atom_site_aniso_U_11
_atom_site_aniso_U_22
_atom_site_aniso_U_33
_atom_site_aniso_U_23
_atom_site_aniso_U_13
_atom_site_aniso_U_12
C1 0.026(6) 0.039(7) 0.033(7) -0.001(5) 0.008(5) 0.018(5)
C2 0.023(5) 0.021(5) 0.038(6) 0.010(4) 0.004(5) -0.002(4)
C3 0.037(7) 0.033(6) 0.047(8) 0.006(6) 0.021(6) 0.007(5)
C4 0.012(4) 0.012(4) 0.031(5) 0.006(4) 0.005(4) 0.004(3)
C5 0.027(6) 0.015(5) 0.044(7) 0.010(5) 0.015(5) 0.002(4)
C6 0.045(8) 0.027(6) 0.027(7) 0.015(5) 0.002(6) -0.003(5)
C7 0.019(5) 0.019(5) 0.035(7) 0.009(5) 0.005(5) 0.004(4)
C8 0.020(6) 0.023(6) 0.038(7) 0.006(5) 0.008(5) 0.008(4)
C9 0.022(6) 0.026(6) 0.042(7) 0.006(5) 0.014(5) -0.005(5)
C10 0.022(6) 0.028(6) 0.018(5) 0.004(4) -0.002(4) -0.002(4)
C11 0.032(6) 0.021(5) 0.027(6) 0.003(4) 0.004(5) -0.002(5)
C12 0.022(6) 0.024(6) 0.031(6) 0.003(5) -0.001(5) 0.007(4)
N1 0.022(5) 0.032(5) 0.029(5) 0.006(4) 0.012(4) -0.001(4)
N2 0.015(4) 0.027(5) 0.027(5) -0.001(4) 0.005(4) -0.006(4)
Se1 0.0127(6) 0.0191(7) 0.0152(7) -0.0003(5) 0.0026(5) -0.0007(5)
Se2 0.0165(5) 0.0168(5) 0.0168(5) -0.0010(4) 0.0008(4) 0.0012(4)
Br1 0.0158(5) 0.0207(5) 0.0191(5) 0.0038(4) -0.0005(4) 0.0010(4)
Br2 0.0150(5) 0.0252(5) 0.0233(5) -0.0003(4) 0.0056(4) -0.0024(4)
Br3 0.0176(5) 0.0184(5) 0.0204(5) -0.0040(4) 0.0027(4) -0.0004(4)
Br4 0.0251(6) 0.0239(6) 0.0410(7) 0.0049(5) 0.0081(5) 0.0007(5)
Br5 0.0217(5) 0.0168(5) 0.0236(5) -0.0001(4) 0.0010(4) 0.0028(4)
Br6 0.0253(6) 0.0233(5) 0.0311(6) 0.0046(5) 0.0080(5) 0.0018(4)
Br7 0.0205(5) 0.0267(6) 0.0239(6) 0.0033(4) 0.0053(4) -0.0011(4)
Br8 0.0390(7) 0.0207(5) 0.0246(6) -0.0077(4) 0.0020(5) 0.0023(5)
Br9 0.0261(6) 0.0351(6) 0.0226(6) 0.0065(5) -0.0040(5) 0.0072(5)
Br10 0.0175(5) 0.0302(6) 0.0218(5) 0.0001(4) -0.0002(4) 0.0065(4)
Br11 0.0930(17) 0.0123(7) 0.0202(8) 0.000 0.0096(9) 0.000

_geom_special_details            
;
 All esds (except the esd in the dihedral angle between two l.s. planes)
 are estimated using the full covariance matrix.  The cell esds are taken
 into account individually in the estimation of esds in distances, angles
 and torsion angles; correlations between esds in cell parameters are only
 used when they are defined by crystal symmetry.  An approximate (isotropic)
 treatment of cell esds is used for estimating esds involving l.s. planes.
;

loop_
_geom_bond_atom_site_label_1
_geom_bond_atom_site_label_2
_geom_bond_distance
_geom_bond_site_symmetry_2
_geom_bond_publ_flag
C1 N1 1.310(16) . ?
C1 C2 1.369(16) . ?
C1 H1 0.9500 . ?
C2 C4 1.400(15) . ?
C2 H2 0.9500 . ?
C3 C4 1.489(15) . ?
C3 H3A 0.9800 . ?
C3 H3B 0.9800 . ?
C3 H3C 0.9800 . ?
C4 C5 1.385(14) . ?
C5 C6 1.355(16) . ?
C5 H5 0.9500 . ?
C6 N1 1.327(16) . ?
C6 H6 0.9500 . ?
C7 N2 1.348(14) . ?
C7 C8 1.388(15) . ?
C7 H7 0.9500 . ?
C8 C10 1.375(16) . ?
C8 H8 0.9500 . ?
C9 C10 1.477(15) . ?
C9 H9A 0.9800 . ?
C9 H9B 0.9800 . ?
C9 H9C 0.9800 . ?
C10 C11 1.415(16) . ?
C11 C12 1.351(16) . ?
C11 H11 0.9500 . ?
C12 N2 1.333(14) . ?
C12 H12 0.9500 . ?
N1 H1A 0.8800 . ?
N2 H2A 0.8800 . ?
Se1 Br3 2.5687(10) . ?
Se1 Br3 2.5688(10) 7_666 ?
Se1 Br1 2.5688(10) . ?
Se1 Br1 2.5689(10) 7_666 ?
Se1 Br2 2.5804(10) . ?
Se1 Br2 2.5804(10) 7_666 ?
Se2 Br8 2.3741(15) . ?
Se2 Br9 2.4019(15) . ?
Se2 Br7 2.4057(15) . ?
Br4 Br5 2.4667(16) . ?
Br5 Br6 2.6679(16) . ?
C15 C13 1.3900 . ?
C15 C17 1.3900 . ?
C15 C18 1.48(3) . ?
C13 C14 1.3900 . ?
C13 H13 0.9500 . ?
C14 N3 1.3900 . ?
C14 H14 0.9500 . ?
N3 C16 1.3900 . ?
N3 H3 0.8800 . ?
C16 C17 1.3900 . ?
C16 H16 0.9500 . ?
C17 H17 0.9500 . ?
C18 H18A 0.9800 . ?
C18 H18B 0.9800 . ?
C18 H18C 0.9800 . ?

loop_
_geom_angle_atom_site_label_1
_geom_angle_atom_site_label_2
_geom_angle_atom_site_label_3
_geom_angle
_geom_angle_site_symmetry_1
_geom_angle_site_symmetry_3
_geom_angle_publ_flag
N1 C1 C2 120.5(11) . . ?
N1 C1 H1 119.8 . . ?
C2 C1 H1 119.8 . . ?
C1 C2 C4 119.2(10) . . ?
C1 C2 H2 120.4 . . ?
C4 C2 H2 120.4 . . ?
C4 C3 H3A 109.5 . . ?
C4 C3 H3B 109.5 . . ?
H3A C3 H3B 109.5 . . ?
C4 C3 H3C 109.5 . . ?
H3A C3 H3C 109.5 . . ?
H3B C3 H3C 109.5 . . ?
C5 C4 C2 117.0(10) . . ?
C5 C4 C3 120.3(10) . . ?
C2 C4 C3 122.7(10) . . ?
C6 C5 C4 121.3(11) . . ?
C6 C5 H5 119.4 . . ?
C4 C5 H5 119.4 . . ?
N1 C6 C5 119.0(11) . . ?
N1 C6 H6 120.5 . . ?
C5 C6 H6 120.5 . . ?
N2 C7 C8 117.1(10) . . ?
N2 C7 H7 121.5 . . ?
C8 C7 H7 121.5 . . ?
C10 C8 C7 122.3(10) . . ?
C10 C8 H8 118.8 . . ?
C7 C8 H8 118.8 . . ?
C10 C9 H9A 109.5 . . ?
C10 C9 H9B 109.5 . . ?
H9A C9 H9B 109.5 . . ?
C10 C9 H9C 109.5 . . ?
H9A C9 H9C 109.5 . . ?
H9B C9 H9C 109.5 . . ?
C8 C10 C11 117.0(10) . . ?
C8 C10 C9 121.1(10) . . ?
C11 C10 C9 121.9(10) . . ?
C12 C11 C10 119.6(11) . . ?
C12 C11 H11 120.2 . . ?
C10 C11 H11 120.2 . . ?
N2 C12 C11 121.0(10) . . ?
N2 C12 H12 119.5 . . ?
C11 C12 H12 119.5 . . ?
C1 N1 C6 122.9(10) . . ?
C1 N1 H1A 118.5 . . ?
C6 N1 H1A 118.5 . . ?
C12 N2 C7 122.9(10) . . ?
C12 N2 H2A 118.5 . . ?
C7 N2 H2A 118.5 . . ?
Br3 Se1 Br3 180.00(4) . 7_666 ?
Br3 Se1 Br1 90.82(3) . . ?
Br3 Se1 Br1 89.18(3) 7_666 . ?
Br3 Se1 Br1 89.18(3) . 7_666 ?
Br3 Se1 Br1 90.82(3) 7_666 7_666 ?
Br1 Se1 Br1 180.00(3) . 7_666 ?
Br3 Se1 Br2 90.62(3) . . ?
Br3 Se1 Br2 89.38(3) 7_666 . ?
Br1 Se1 Br2 90.61(3) . . ?
Br1 Se1 Br2 89.39(3) 7_666 . ?
Br3 Se1 Br2 89.39(3) . 7_666 ?
Br3 Se1 Br2 90.61(3) 7_666 7_666 ?
Br1 Se1 Br2 89.39(3) . 7_666 ?
Br1 Se1 Br2 90.61(3) 7_666 7_666 ?
Br2 Se1 Br2 180.0 . 7_666 ?
Br8 Se2 Br9 95.83(6) . . ?
Br8 Se2 Br7 95.46(5) . . ?
Br9 Se2 Br7 93.73(5) . . ?
Br4 Br5 Br6 178.45(6) . . ?
C13 C15 C17 120.0 . . ?
C13 C15 C18 120.2(14) . . ?
C17 C15 C18 119.8(14) . . ?
C15 C13 C14 120.0 . . ?
C15 C13 H13 120.0 . . ?
C14 C13 H13 120.0 . . ?
N3 C14 C13 120.0 . . ?
N3 C14 H14 120.0 . . ?
C13 C14 H14 120.0 . . ?
C16 N3 C14 120.0 . . ?
C16 N3 H3 120.0 . . ?
C14 N3 H3 120.0 . . ?
N3 C16 C17 120.0 . . ?
N3 C16 H16 120.0 . . ?
C17 C16 H16 120.0 . . ?
C16 C17 C15 120.0 . . ?
C16 C17 H17 120.0 . . ?
C15 C17 H17 120.0 . . ?
C15 C18 H18A 109.5 . . ?
C15 C18 H18B 109.5 . . ?
H18A C18 H18B 109.5 . . ?
C15 C18 H18C 109.5 . . ?
H18A C18 H18C 109.5 . . ?
H18B C18 H18C 109.5 . . ?

_refine_diff_density_max         1.398
_refine_diff_density_min         -1.809
_refine_diff_density_rms         0.229

_shelx_res_file                  
;
TITL 1_a.res in C2/c
    1_a.res
    created by SHELXL-2017/1 at 14:32:32 on 24-May-2022
REM Old TITL 1 in C2/c
REM SHELXT solution in C2/c
REM R1 0.163,  Rweak 0.012,  Alpha 0.037,  Orientation as input
REM Formula found by SHELXT:  C29 N6 Br24
CELL  0.71073  11.0372  16.0823  33.0610   90.000   94.534   90.000
ZERR   4.000   0.0009   0.0012   0.0030    0.000    0.003    0.000
LATT  7
SYMM -X, Y, 1/2-Z
SFAC C   H   N SE BR
UNIT 120 160 20 12 84

TEMP -123.150
L.S. 10
BOND $H
LIST 4
SIMU 0.01 0.02 C3 c4 c2 c6
FMAP 2
OMIT 0
OMIT -1 5 4
acta 51
SIZE 0.09 0.07 0.04
PLAN 20
WGHT    0.035800  216.765594
FVAR       0.06589
C1    1    0.812335    0.830838    0.358179    11.00000    0.02553    0.03904 =
         0.03291   -0.00085    0.00774    0.01791
AFIX  43
H1    2    0.747879    0.868638    0.361717    11.00000   -1.20000
AFIX   0
C2    1    0.907128    0.854616    0.336458    11.00000    0.02330    0.02079 =
         0.03824    0.01002    0.00371   -0.00211
AFIX  43
H2    2    0.908639    0.908598    0.324841    11.00000   -1.20000
AFIX   0
C3    1    1.110470    0.820240    0.309772    11.00000    0.03697    0.03284 =
         0.04734    0.00575    0.02095    0.00659
AFIX 133
H3A   2    1.167451    0.852516    0.327785    11.00000   -1.50000
H3B   2    1.085250    0.853362    0.285683    11.00000   -1.50000
H3C   2    1.150224    0.769187    0.301502    11.00000   -1.50000
AFIX   0
C4    1    1.001801    0.798445    0.331570    11.00000    0.01201    0.01248 =
         0.03095    0.00609    0.00497    0.00362
C5    1    0.990735    0.719849    0.348021    11.00000    0.02663    0.01537 =
         0.04408    0.00968    0.01550    0.00153
AFIX  43
H5    2    1.051132    0.679179    0.344112    11.00000   -1.20000
AFIX   0
C6    1    0.895424    0.699840    0.369583    11.00000    0.04499    0.02698 =
         0.02737    0.01468    0.00224   -0.00297
AFIX  43
H6    2    0.889909    0.646154    0.381284    11.00000   -1.20000
AFIX   0
C7    1    0.346017    0.698446    0.440538    11.00000    0.01859    0.01935 =
         0.03507    0.00862    0.00494    0.00351
AFIX  43
H7    2    0.358888    0.755462    0.434704    11.00000   -1.20000
AFIX   0
C8    1    0.234681    0.669985    0.451697    11.00000    0.01995    0.02307 =
         0.03825    0.00599    0.00766    0.00800
AFIX  43
H8    2    0.169743    0.708469    0.452847    11.00000   -1.20000
AFIX   0
C9    1    0.097768    0.560458    0.475123    11.00000    0.02187    0.02642 =
         0.04174    0.00620    0.01435   -0.00481
AFIX 133
H9A   2    0.058683    0.607097    0.488047    11.00000   -1.50000
H9B   2    0.111874    0.515120    0.494737    11.00000   -1.50000
H9C   2    0.044915    0.540840    0.451861    11.00000   -1.50000
AFIX   0
C10   1    0.215065    0.588061    0.461145    11.00000    0.02177    0.02812 =
         0.01786    0.00412   -0.00168   -0.00188
C11   1    0.312010    0.532005    0.456866    11.00000    0.03210    0.02053 =
         0.02704    0.00309    0.00368   -0.00159
AFIX  43
H11   2    0.301601    0.474310    0.461693    11.00000   -1.20000
AFIX   0
C12   1    0.419499    0.561038    0.445870    11.00000    0.02176    0.02358 =
         0.03136    0.00255   -0.00077    0.00694
AFIX  43
H12   2    0.484958    0.523465    0.443466    11.00000   -1.20000
AFIX   0

N1    3    0.809912    0.756346    0.374112    11.00000    0.02231    0.03154 =
         0.02865    0.00649    0.01234   -0.00120
AFIX  43
H1A   2    0.748861    0.743178    0.388459    11.00000   -1.20000
AFIX   0
N2    3    0.435085    0.641620    0.438343    11.00000    0.01547    0.02689 =
         0.02709   -0.00077    0.00495   -0.00552
AFIX  43
H2A   2    0.506673    0.658465    0.431645    11.00000   -1.20000
AFIX   0
SE1   4    0.750000    0.750000    0.500000    10.50000    0.01271    0.01906 =
         0.01524   -0.00027    0.00265   -0.00073
SE2   4   -0.469579    0.352816    0.695872    11.00000    0.01655    0.01680 =
         0.01684   -0.00096    0.00080    0.00119
BR1   5    0.615696    0.823667    0.443964    11.00000    0.01579    0.02072 =
         0.01914    0.00379   -0.00049    0.00101
BR2   5    0.559617    0.695647    0.532101    11.00000    0.01503    0.02522 =
         0.02330   -0.00033    0.00558   -0.00240
BR3   5    0.751797    0.880807    0.544628    11.00000    0.01765    0.01835 =
         0.02036   -0.00398    0.00272   -0.00043
BR4   5    0.324589    0.605122    0.578052    11.00000    0.02512    0.02386 =
         0.04101    0.00491    0.00808    0.00075
BR5   5    0.140214    0.554428    0.607732    11.00000    0.02174    0.01682 =
         0.02360   -0.00012    0.00100    0.00277
BR6   5   -0.062418    0.503251    0.639056    11.00000    0.02527    0.02330 =
         0.03108    0.00465    0.00795    0.00176
BR7   5   -0.293170    0.414641    0.669806    11.00000    0.02052    0.02674 =
         0.02393    0.00327    0.00531   -0.00107
BR8   5   -0.459943    0.227146    0.658587    11.00000    0.03902    0.02071 =
         0.02456   -0.00773    0.00201    0.00229
BR9   5   -0.609112    0.421960    0.647574    11.00000    0.02608    0.03509 =
         0.02262    0.00651   -0.00403    0.00722
BR10  5   -0.329259    0.284289    0.762860    11.00000    0.01754    0.03018 =
         0.02182    0.00007   -0.00019    0.00655
BR11  5   -0.500000    0.488425    0.750000    10.50000    0.09303    0.01231 =
         0.02016    0.00000    0.00960    0.00000
PART -1
AFIX  66
C15   1    0.058656    0.513228    0.743646    10.50000    0.02435
C13   1    0.036034    0.429091    0.749040    10.50000    0.02019
AFIX  43
H13   2    0.096848    0.389204    0.744352    10.50000   -1.20000
AFIX  65
C14   1   -0.075566    0.403317    0.761294    10.50000    0.03862
AFIX  43
H14   2   -0.091027    0.345813    0.764981    10.50000   -1.20000
AFIX  65
N3    3   -0.164546    0.461678    0.768154    10.50000    0.04497
AFIX  43
H3    2   -0.235200    0.445360    0.775912    10.50000   -1.20000
AFIX  65
C16   1   -0.141926    0.545815    0.762760    10.50000    0.03449
AFIX  43
H16   2   -0.202740    0.585702    0.767448    10.50000   -1.20000
AFIX  65
C17   1   -0.030326    0.571591    0.750505    10.50000    0.03089
AFIX  43
H17   2   -0.014866    0.629094    0.746819    10.50000   -1.20000
AFIX   0
C18   1    0.175150    0.540609    0.729055    10.50000    0.02994
AFIX 133
H18A  2    0.239998    0.502637    0.739236    10.50000   -1.50000
H18B  2    0.193852    0.596987    0.738919    10.50000   -1.50000
H18C  2    0.168961    0.540385    0.699321    10.50000   -1.50000
PART 0

AFIX   0
HKLF 4


REM  1_a.res in C2/c
REM R1 =  0.0625 for    5748 Fo > 4sig(Fo)  and  0.0791 for all    6980 data
REM    253 parameters refined using     12 restraints

END

WGHT      0.0000    214.6332

REM Highest difference peak  1.398,  deepest hole -1.809,  1-sigma level  0.229
Q1    1  -0.4593  0.5006  0.7546  11.00000  0.05    1.40
Q2    1   1.0000  0.8025  0.2500  10.50000  0.05    1.19
Q3    1   0.7127  0.8914  0.5065  11.00000  0.05    0.99
Q4    1  -0.3756  0.4710  0.7667  11.00000  0.05    0.99
Q5    1  -0.0996  0.5364  0.6715  11.00000  0.05    0.95
Q6    1   0.0000  0.3935  0.7500  10.50000  0.05    0.89
Q7    1   0.5409  0.8608  0.4774  11.00000  0.05    0.86
Q8    1   0.0625  0.4606  0.6226  11.00000  0.05    0.85
Q9    1   0.7802  0.7451  0.4520  11.00000  0.05    0.85
Q10   1  -0.0420  0.7037  0.7065  11.00000  0.05    0.81
Q11   1   0.1022  0.5959  0.5208  11.00000  0.05    0.81
Q12   1   0.9805  0.6608  0.3913  11.00000  0.05    0.81
Q13   1   0.6419  0.7140  0.5632  11.00000  0.05    0.81
Q14   1  -0.1363  0.5796  0.6069  11.00000  0.05    0.80
Q15   1   0.0753  0.5179  0.4692  11.00000  0.05    0.80
Q16   1   0.2741  0.8150  0.4506  11.00000  0.05    0.80
Q17   1   0.1654  0.4658  0.4381  11.00000  0.05    0.79
Q18   1   0.0995  0.7279  0.4774  11.00000  0.05    0.79
Q19   1   0.1409  0.4482  0.5766  11.00000  0.05    0.79
Q20   1  -0.7448  0.4615  0.6216  11.00000  0.05    0.78
;
_shelx_res_checksum              32756

_shelx_hkl_file                  
;
  -2   0   2 1283.17   50.29
   2   0  -2 1294.97   50.19
  -2   0   2 1267.17   52.09
   2   0  -2 1299.17   52.09
   4   0  -4 2208.88   88.79
  -4   0   4 2165.78   88.79
   4   0  -4 2165.38   84.69
  -4   0   4 2128.39   85.29
  -6   0   6   48.90    6.50
  -6   0   6   58.39    9.20
   6   0  -6   47.30    4.70
   6   0  -6   57.69    9.50
   8   0  -8   34.90    4.70
  -8   0   8   37.30    6.90
   8   0  -8   39.60    9.30
  -8   0   8   40.00    9.80
  10   0 -10  138.69    8.60
  10   0 -10  130.49   17.60
  10   0 -10  141.59   10.80
  12   0 -12    6.60    9.40
  14   0 -14  365.96   33.80
  -1   1   1 2415.36   92.79
  -1   1   1 2453.95   93.09
  -1  -1   1 2429.46   91.99
   1  -1  -1 2286.27   92.99
  -1  -1   1 2402.16   92.49
  -3   1   3  181.98    9.60
   3   1  -3  200.28    8.40
  -3   1   3  168.78   11.10
   3   1  -3  177.78   10.80
  -3  -1   3  197.68   11.10
   3  -1  -3  166.98    9.30
   3  -1  -3  180.78   11.30
   5   1  -5  140.89   11.40
  -5   1   5  141.09    9.30
   5   1  -5  138.79    7.50
  -5   1   5  155.08   12.40
   5  -1  -5  144.99    8.90
  -5  -1   5  148.49   11.60
  -5  -1   5  163.98    9.60
   5  -1  -5  141.69   11.90
  -7   1   7   13.30    5.50
   7   1  -7   23.70    4.60
  -7   1   7   27.60    5.50
   7   1  -7   20.70    3.00
   7   1  -7   12.60    5.70
  -7  -1   7   42.00    9.50
   7  -1  -7   19.90    4.00
   7  -1  -7   24.60    7.10
   9   1  -9   39.10    3.60
  -9   1   9   31.20    9.90
  -9   1   9   39.20    8.00
   9   1  -9   38.00    9.40
   9   1  -9   36.90    3.90
  -9  -1   9   86.39   14.70
   9  -1  -9   36.40    5.50
   9  -1  -9   42.20   10.20
  11   1 -11   23.10    9.50
  11  -1 -11    3.50    7.60
  11  -1 -11    6.20    3.80
  13   1 -13  115.39   19.70
  13  -1 -13  142.49   21.90
   0   2   0  103.79    5.50
   0   2   0   79.59    6.30
   0  -2   0   96.39    5.50
   0  -2   0  100.89    6.70
   2   2  -2  471.35   20.30
  -2   2   2  451.75   21.30
   2   2  -2  462.75   19.10
  -2   2   2  459.95   20.80
  -2  -2   2  454.95   19.20
   2  -2  -2  470.75   20.70
   2  -2  -2  505.25   21.50
  -2  -2   2  470.85   20.30
   4   2  -4 1801.52   72.09
   4   2  -4 1829.12   76.29
  -4   2   4 1896.81   77.79
   4   2  -4 1805.42   72.39
  -4   2   4 1862.51   75.19
  -4  -2   4 1899.51   76.59
   4  -2  -4 1935.51   77.89
   4  -2  -4 1869.71   74.79
   6   2  -6   40.90    3.10
   6   2  -6   46.80    8.00
   6   2  -6   34.60    3.20
  -6   2   6   37.10    7.20
  -6   2   6   43.50    6.30
   6  -2  -6   32.90    7.80
   6  -2  -6   48.60    6.00
  -6  -2   6   39.50    7.60
  -8   2   8   26.50    8.50
  -8   2   8   74.19    9.20
   8   2  -8   57.29   10.50
   8  -2  -8   35.20    9.20
   8  -2  -8   40.60    6.40
  -8  -2   8   43.50    9.90
 -10   2  10   34.70    8.20
  10   2 -10   11.20    8.30
  10  -2 -10   16.40    5.00
  10  -2 -10   30.60   10.80
 -12   2  12  198.78   19.00
  12   2 -12  165.18   21.20
  12  -2 -12  186.88   24.10
  12  -2 -12  185.98   12.80
  14   2 -14   22.80   12.60
  14  -2 -14   40.10   14.70
   1   3  -1  322.47   12.40
   1   3  -1  281.67   17.00
   1   3  -1  328.37   14.20
  -1   3   1  276.87   13.80
  -1   3   1  304.87   14.80
  -1   3   1  318.67   16.40
  -1  -3   1  297.67   12.10
   1  -3  -1  298.37   16.20
  -1  -3   1  318.47   17.50
  -1  -3   1  300.37   14.00
   1  -3  -1  291.17   14.70
   1  -3  -1  284.37   13.70
  -3   3   3 2286.57   89.69
   3   3  -3 2155.98   87.39
  -3   3   3 2295.67   88.59
   3   3  -3 2200.08   85.69
   3  -3  -3 2162.38   88.19
   3  -3  -3 2116.89   89.09
  -3  -3   3 2195.58   85.99
  -3  -3   3 2192.28   87.49
   5   3  -5  829.52   34.00
   5   3  -5  839.32   33.50
   5   3  -5  859.91   38.80
  -5   3   5  829.82   37.90
  -5   3   5  853.91   40.60
   5  -3  -5  852.21   40.50
  -5  -3   5  848.82   39.10
   5  -3  -5  839.52   37.50
   7   3  -7   21.50    6.50
  -7   3   7   25.10    7.40
  -7   3   7   19.80    5.20
   7  -3  -7   24.70    8.00
   7  -3  -7   23.40    5.20
  -7  -3   7   24.10    7.10
   9   3  -9  568.94   33.00
  -9   3   9  514.15   29.70
   9  -3  -9  545.45   27.70
   9  -3  -9  577.44   34.70
  -9  -3   9  512.45   32.90
 -11   3  11   39.40   11.80
  11   3 -11   30.30   10.90
  11  -3 -11   46.70   12.80
  11  -3 -11   45.90    7.60
  13   3 -13  206.18   24.10
  13  -3 -13  170.68   13.60
  13  -3 -13  169.98   24.60
   0   4   0    2.20    1.90
   0   4   0   -2.50    2.10
   0   4   0    1.20    0.90
   0  -4   0    3.10    1.90
   0  -4   0    2.50    0.90
   0  -4   0    1.80    2.20
  -2   4   2  310.57   15.90
   2   4  -2  273.57   19.10
  -2   4   2  299.17   15.20
   2   4  -2  303.37   12.90
   2   4  -2  303.57   14.20
   2  -4  -2  273.27   14.90
  -2  -4   2  297.17   14.30
   2  -4  -2  287.57   15.60
  -2  -4   2  278.17   12.90
   2  -4  -2  272.97   17.70
  -4   4   4  464.85   23.30
   4   4  -4  471.95   22.20
  -4   4   4  462.95   24.50
   4   4  -4  453.45   19.80
   4  -4  -4  504.25   24.90
  -4  -4   4  433.66   22.10
  -4  -4   4  434.66   20.50
   4  -4  -4  450.95   23.00
   6   4  -6  171.28    8.20
   6   4  -6  198.58   14.20
  -6   4   6  171.38   15.20
   6   4  -6  184.58    8.90
  -6   4   6  170.08   13.10
   6  -4  -6  169.88   12.90
  -6  -4   6  197.08   14.40
   6  -4  -6  189.08   15.60
  -8   4   8   44.10    8.40
  -8   4   8   41.20    9.90
   8   4  -8   49.80    9.70
  -8  -4   8   39.50    8.70
   8  -4  -8   40.80    9.40
   8  -4  -8   51.89    8.30
 -10   4  10  222.98   18.00
  10   4 -10  174.88   17.90
  10  -4 -10  194.78   15.30
  10  -4 -10  176.18   21.00
 -12   4  12   35.40   12.80
  12   4 -12   34.50   11.80
  12  -4 -12   46.30    8.30
  12  -4 -12   28.80   12.00
   1   5  -1   10.50    3.10
  -1   5   1    5.00    2.00
  -1   5   1    4.50    2.80
  -1   5   1    0.50    2.80
   1   5  -1    9.80    4.80
   1  -5  -1    3.80    2.90
  -1  -5   1    6.00    2.70
   1  -5  -1   10.50    4.30
  -1  -5   1    5.10    3.90
   1  -5  -1    3.20    1.90
  -3   5   3  198.98   12.90
   3   5  -3  195.68   10.20
   3   5  -3  192.48   10.80
   3   5  -3  193.98   17.80
  -3   5   3  199.88   13.10
  -3  -5   3  197.78   10.40
   3  -5  -3  180.08   12.60
  -3  -5   3  187.78   11.10
   3  -5  -3  188.08   17.50
   3  -5  -3  199.48   12.90
   5   5  -5  206.78   11.10
   5   5  -5  230.58   14.00
  -5   5   5  227.38   15.30
  -5   5   5  192.88   15.30
  -5  -5   5  222.28   12.30
   5  -5  -5  220.08   14.90
  -5  -5   5  219.28   13.90
   5  -5  -5  244.78   16.60
   7   5  -7 2540.65  105.49
   7   5  -7 2478.45   97.29
  -7   5   7 2567.64  109.99
  -7   5   7 2542.15  106.09
  -7  -5   7 2490.45  106.29
   7  -5  -7 2608.24  109.29
   9   5  -9   16.80    8.20
  -9   5   9    4.80    6.50
   9  -5  -9   27.00    9.30
   9  -5  -9    3.50    5.20
  11   5 -11   43.20   12.40
 -11   5  11   52.69   11.40
  11  -5 -11   38.70    8.90
  11  -5 -11   34.10   12.60
 -13   5  13  -14.30   16.20
  13   5 -13    4.20    9.70
  13  -5 -13   -3.00   13.50
  13  -5 -13    2.90    7.70
   0   6   0  174.08    8.50
   0   6   0  207.88   12.40
   0   6   0  158.08   14.30
   0  -6   0  182.98   14.80
   0  -6   0  172.88   11.70
   0  -6   0  172.38    8.20
   2   6  -2  101.89    4.70
  -2   6   2   86.19   10.90
   2   6  -2   99.29   14.10
   2   6  -2  106.39    4.80
  -2   6   2   97.19    8.10
   2   6  -2   99.29    8.10
   2  -6  -2  111.99   14.60
   2  -6  -2  109.49    9.30
   2  -6  -2  103.69    8.00
  -2  -6   2   91.49    7.90
  -4   6   4  512.05   25.80
  -4   6   4  462.65   25.30
   4   6  -4  499.95   22.00
   4   6  -4  412.86   21.40
   4  -6  -4  481.15   25.30
  -4  -6   4  454.25   21.90
   4  -6  -4  473.65   29.80
   4  -6  -4  471.15   25.30
  -4  -6   4  441.36   22.10
  -6   6   6 1632.44   74.39
   6   6  -6 1620.74   69.79
   6   6  -6 1660.33   65.89
  -6   6   6 1724.43   72.69
  -6  -6   6 1634.04   70.49
  -6  -6   6 1685.53   67.99
   6  -6  -6 1656.53   71.79
   6  -6  -6 1543.95   73.09
  -8   6   8  899.41   48.30
   8   6  -8  881.11   43.60
  -8   6   8  906.91   44.60
   8  -6  -8  835.52   43.00
  -8  -6   8  846.92   44.20
   8  -6  -8  915.61   47.10
  10   6 -10  231.78   20.80
 -10   6  10  249.58   21.50
  10  -6 -10  233.18   25.60
 -10  -6  10  197.78   21.70
  10  -6 -10  230.08   18.70
 -12   6  12    0.10   15.00
  12   6 -12    2.60    8.50
  12  -6 -12   -1.00   10.20
  12  -6 -12   12.40    7.10
  -1   7   1   10.20    3.60
   1   7  -1   14.20    6.90
  -1   7   1   13.00    5.70
   1   7  -1   13.60    4.00
  -1   7   1   11.10    2.90
  -1  -7   1   15.50    6.40
  -1  -7   1   13.20    4.20
   1  -7  -1    5.90    4.00
   1  -7  -1   11.80    2.80
   1  -7  -1   11.10    5.80
   3   7  -3    6.90    3.30
  -3   7   3   10.00    4.10
   3   7  -3   11.20    2.10
   3   7  -3   20.40    7.60
  -3   7   3    6.50    4.00
  -3  -7   3   14.30    4.30
  -3  -7   3   14.00    2.70
   3  -7  -3   10.40    6.50
   3  -7  -3   20.80    5.50
   3  -7  -3   13.70    4.50
   5   7  -5    0.10    7.70
   5   7  -5    3.10    3.20
  -5   7   5    3.80    4.80
   5   7  -5    8.40    3.00
  -5   7   5   16.70    6.20
  -5  -7   5    2.90    2.90
   5  -7  -5    5.00    4.20
   5  -7  -5   16.50    9.10
  -5  -7   5   -0.40    3.00
   5  -7  -5    5.70    4.80
  -7   7   7  196.48   17.80
   7   7  -7  220.08   14.90
   7   7  -7  202.98   11.20
   7   7  -7  229.58   22.30
  -7   7   7  201.48   19.50
   7  -7  -7  187.18   16.80
  -7  -7   7  200.08   15.70
   7  -7  -7  196.78   18.10
  -9   7   9   66.39   12.10
   9   7  -9   59.69   11.20
  -9  -7   9   81.19   13.20
   9  -7  -9   54.69   11.00
   9  -7  -9   76.99   14.30
  11   7 -11  109.09   16.40
 -11   7  11  115.69   17.20
  11  -7 -11  110.29   15.50
  11  -7 -11  112.59   18.50
  13   7 -13   64.99   16.30
  13  -7 -13   97.79   14.70
  13  -7 -13   65.09   18.00
   0   8   0    8.80    6.50
   0   8   0   10.50    4.40
   0  -8   0    9.60    6.30
   0  -8   0    5.10    1.70
   0  -8   0    7.80    3.80
   0  -8   0    6.70    1.70
  -2   8   2 2110.39   98.69
  -2   8   2 2133.69   90.59
   2   8  -2 2126.29   88.39
  -2   8   2 2142.39   86.89
   2  -8  -2 2182.88   90.79
  -2  -8   2 2005.40   95.99
  -2  -8   2 2178.68   88.69
   2  -8  -2 2120.39   86.19
   2  -8  -2 2165.58   95.19
   4   8  -4   22.10    9.70
   4   8  -4   17.00    4.40
  -4   8   4   15.20    5.60
   4   8  -4   13.60    3.00
  -4   8   4   14.60    5.90
  -4  -8   4   16.70    3.50
  -4  -8   4    9.40    4.00
   4  -8  -4   14.90    5.20
   4  -8  -4   18.10    7.90
   4  -8  -4    9.00    5.40
   6   8  -6  207.18   13.90
  -6   8   6  228.28   18.50
   6   8  -6  254.27   33.00
   6   8  -6  229.88   13.50
  -6   8   6  186.38   17.50
   6  -8  -6  296.77   33.60
  -6  -8   6  225.68   14.40
  -6  -8   6  186.78   13.80
   6  -8  -6  218.48   17.90
   6  -8  -6  231.28   18.20
   8   8  -8   19.00    4.70
  -8   8   8   22.60    8.90
   8   8  -8   31.70    7.60
   8   8  -8   23.30    3.90
  -8  -8   8   20.60    7.80
   8  -8  -8   11.20    6.50
   8  -8  -8   16.40    8.60
  10   8 -10  125.79   15.20
 -10   8  10   98.59   16.10
  10  -8 -10  150.58   18.10
 -10  -8  10  111.29   17.50
  10  -8 -10  135.19   18.70
  12   8 -12   -3.20    8.80
  12  -8 -12   -3.00   11.00
  12  -8 -12   13.90    9.40
  -1   9   1  333.07   24.90
   1   9  -1  314.77   25.50
  -1   9   1  342.37   17.20
   1   9  -1  351.86   21.10
  -1   9   1  349.17   21.60
   1  -9  -1  331.27   16.60
   1  -9  -1  358.26   25.40
  -1  -9   1  363.36   21.50
   1  -9  -1  358.06   21.50
  -1  -9   1  343.67   26.50
  -3   9   3   53.19    9.00
   3   9  -3   41.60   12.30
  -3   9   3   48.60    7.80
   3   9  -3   41.60    7.30
   3  -9  -3   46.20    9.20
   3  -9  -3   35.20    9.40
  -3  -9   3   34.00    7.00
   3  -9  -3   36.60    6.70
  -5   9   5   -1.10    4.80
   5   9  -5   -6.70    8.50
  -5   9   5   -1.50    5.20
   5   9  -5   -1.50    2.80
   5  -9  -5   -1.10    7.60
  -5  -9   5    5.60    4.50
  -5  -9   5    0.50    2.90
   5  -9  -5    9.40    6.00
   5  -9  -5    5.50    4.90
  -7   9   7  -16.90    6.40
   7   9  -7   16.80   13.40
   7   9  -7    8.70    4.10
   7   9  -7   10.40    4.80
  -7   9   7    2.30    6.70
   7  -9  -7   -2.40   10.40
   7  -9  -7   16.30    7.10
   7  -9  -7   12.00    7.40
  -7  -9   7    9.50    5.40
  -7  -9   7    3.70    4.40
   9   9  -9   39.60   20.10
  -9   9   9    5.80    9.80
   9   9  -9    7.80    6.40
  -9  -9   9  -10.70    7.00
   9  -9  -9    6.00    7.40
   9  -9  -9    3.50    8.40
  11   9 -11   15.20    8.00
  11  -9 -11    3.50    9.40
  11  -9 -11   -2.40    7.80
   0  10   0  435.46   25.90
   0  10   0  432.26   31.20
   0 -10   0  488.25   32.30
   0 -10   0  440.56   26.10
   0 -10   0  435.16   18.60
   0 -10   0  434.06   18.70
  -2  10   2  195.48   13.10
  -2  10   2  191.48   16.60
  -2  10   2  198.58   20.10
   2  10  -2  215.08   15.60
   2  10  -2  252.27   23.80
   2 -10  -2  185.28   12.60
  -2 -10   2  206.68   21.80
  -2 -10   2  186.68   15.10
   2 -10  -2  197.18   20.50
   2 -10  -2  212.88   16.80
   4  10  -4  375.56   21.70
  -4  10   4  375.76   25.20
  -4  10   4  310.07   21.50
   4  10  -4  353.96   32.00
  -4 -10   4  368.96   21.70
   4 -10  -4  394.56   25.00
   4 -10  -4  335.87   30.00
   4 -10  -4  341.17   21.30
   6  10  -6  143.49   10.20
  -6  10   6  158.28   18.20
   6  10  -6  128.29   11.70
   6  10  -6  198.28   30.00
  -6  10   6  157.08   18.10
   6  10  -6  142.89   10.50
   6 -10  -6  137.29   16.20
   6 -10  -6  159.68   15.50
  -6 -10   6  159.38   13.20
   6 -10  -6  124.89   22.30
   8  10  -8   14.40    5.30
   8  10  -8   12.30    4.40
   8  10  -8    1.70   15.90
   8 -10  -8    9.40    7.50
   8 -10  -8   22.10    9.00
  -8 -10   8   18.20    6.70
  -8 -10   8   16.30    6.10
  10  10 -10   37.40   21.80
  10  10 -10   84.09   12.60
  10 -10 -10   71.69   14.20
  10 -10 -10   42.20   13.30
  12  10 -12   11.30   27.30
  12  10 -12   39.10   12.40
  12 -10 -12   16.60   11.40
  12 -10 -12   45.30   15.30
  -1  11   1   55.29   13.30
  -1  11   1   70.79   11.50
  -1  11   1   62.99    6.90
   1  11  -1   55.19   10.00
   1  11  -1   53.49   13.80
   1 -11  -1   50.19    9.60
  -1 -11   1   63.59   13.30
  -1 -11   1   60.69   10.30
   1 -11  -1   62.89    5.90
   1 -11  -1   56.99   12.60
  -3  11   3  421.76   23.20
  -3  11   3  402.56   30.80
   3  11  -3  384.46   24.00
   3  11  -3  372.36   32.30
   3 -11  -3  371.46   21.60
   3 -11  -3  416.46   32.10
  -3 -11   3  431.66   24.80
   3 -11  -3  384.26   25.60
  -5  11   5  115.79   16.40
  -5  11   5   91.79   13.20
   5  11  -5   93.39   11.40
   5  11  -5   86.99    6.00
   5  11  -5  109.49    5.90
   5  11  -5   79.49   18.30
   5 -11  -5   90.89   19.00
  -5 -11   5   95.79   11.90
   5 -11  -5  127.89   16.60
   5 -11  -5   91.39   11.90
   7  11  -7  243.88   14.80
   7  11  -7  239.88   16.30
  -7  11   7  239.28   25.60
   7  11  -7  237.98   15.00
  -7 -11   7  243.38   17.70
   7 -11  -7  258.17   21.40
   7 -11  -7  217.98   21.00
   9  11  -9   58.09   10.50
   9  11  -9   52.79   22.10
   9  11  -9   54.69   10.00
   9  11  -9   86.09   11.70
   9  11  -9   76.99    7.90
   9 -11  -9   62.09   14.30
   9 -11  -9   71.59   13.20
  11  11 -11  568.74   35.30
  11  11 -11  676.93   66.99
  11  11 -11  561.74   35.60
  11 -11 -11  657.93   43.10
  11 -11 -11  587.64   39.20
   0  12   0   94.69   17.70
   0  12   0  100.09   13.80
   0 -12   0   97.39   13.30
   0 -12   0  109.89   19.30
   0 -12   0  120.19    6.10
   0 -12   0  112.29    5.60
  -2  12   2  552.04   33.50
  -2  12   2  564.64   28.40
  -2  12   2  685.93   42.00
   2  12  -2  571.04   32.60
   2  12  -2  511.25   40.30
   2 -12  -2  648.64   51.29
  -2 -12   2  535.35   31.90
  -2 -12   2  541.25   40.80
   2 -12  -2  599.74   34.50
   2 -12  -2  570.04   27.40
   4  12  -4  217.08   30.70
   4  12  -4  189.68   16.80
  -4  12   4  208.38   19.50
  -4  12   4  158.08   16.00
   4 -12  -4  198.28   19.00
   4 -12  -4  229.18   28.40
   4 -12  -4  237.58   16.60
  -4 -12   4  204.18   17.10
   6  12  -6   23.50   13.20
   6  12  -6   11.10    3.40
   6  12  -6   -2.00    5.10
  -6  12   6   17.60    9.50
   6  12  -6   12.30    2.90
   6 -12  -6   11.50    7.90
   6 -12  -6    9.40    7.60
  -6 -12   6   13.70    6.00
   8  12  -8   23.90   17.00
   8  12  -8    1.00    5.30
   8  12  -8   10.80    5.70
   8  12  -8   15.40    5.40
  -8 -12   8   10.40    6.20
   8 -12  -8   17.00   11.20
   8 -12  -8    5.70    7.50
  10  12 -10  102.89   29.80
  10  12 -10  115.19   13.90
  10  12 -10  129.89   15.20
  10 -12 -10  102.49   18.40
  10 -12 -10  128.69   18.60
  -1  13   1   10.90   10.10
  -1  13   1    0.50    6.00
   1  13  -1    6.40   10.50
   1  13  -1    0.80    5.50
  -1 -13   1   -2.60    5.80
   1 -13  -1    9.50    6.60
   1 -13  -1    2.20    2.80
   1 -13  -1    7.50   11.40
  -1 -13   1    1.40   11.10
   1 -13  -1    1.90    2.70
   3  13  -3   40.80    9.50
   3  13  -3   73.19   19.00
  -3  13   3   44.80    8.70
  -3  13   3   41.70   12.70
   3 -13  -3   34.80    7.30
  -3 -13   3   37.70   10.10
   3 -13  -3   29.20   12.20
   3 -13  -3   52.79   11.70
   5  13  -5   19.50    8.40
   5  13  -5   10.90   12.10
  -5  13   5    6.60    6.80
   5 -13  -5   21.40    8.10
   5 -13  -5   13.00    6.80
  -5 -13   5    8.10    5.50
   7  13  -7   95.59    7.70
   7  13  -7   77.69   21.60
   7  13  -7  101.79   13.20
   7  13  -7  100.69    7.20
   7 -13  -7  103.89   16.00
   7 -13  -7  105.09   16.90
  -7 -13   7  115.39   14.30
   9  13  -9   14.90    6.60
   9  13  -9   19.70    6.60
   9  13  -9  -13.40   19.80
   9  13  -9   19.20    7.20
  -9 -13   9   34.20   10.70
   9 -13  -9   17.70   10.80
   9 -13  -9   36.50   12.10
  11  13 -11    5.70    9.10
  11  13 -11   35.50   28.40
  11 -13 -11   -1.70   11.40
   0  14   0  152.38   19.80
   0  14   0  167.38   25.80
   0 -14   0  159.08   19.40
   0 -14   0  134.39   26.70
   2  14  -2   59.19   17.40
  -2  14   2   55.99   16.90
   2  14  -2   68.79   13.10
  -2 -14   2   49.90   10.70
   2 -14  -2   65.79    7.70
   2 -14  -2   63.29    7.90
   2 -14  -2   58.49   11.80
   4  14  -4  104.59   14.90
   4  14  -4   64.29   20.20
  -4  14   4   91.69   13.00
  -4 -14   4   94.59   14.50
   4 -14  -4  105.89   12.20
  -6  14   6    7.10    9.90
   6  14  -6   -2.30    6.60
   6  14  -6   -8.00   12.40
  -6 -14   6   21.30    8.00
   6 -14  -6   15.30   10.00
   6 -14  -6   -2.00    6.90
   8  14  -8   22.40   20.10
   8  14  -8   20.70    8.60
   8  14  -8   28.50    4.10
  -8 -14   8   31.30    9.90
   8 -14  -8   41.20   12.50
   8 -14  -8   16.20    9.50
  10  14 -10   35.10   10.90
  10  14 -10  -12.20   24.70
  10  14 -10   38.60   11.10
  10 -14 -10   61.89   16.70
  10 -14 -10   59.79   15.40
   1  15  -1   80.29   19.80
  -1  15   1   79.99   20.20
  -1 -15   1   79.99   13.40
   1 -15  -1   78.99    6.30
   1 -15  -1   58.09   13.40
   1 -15  -1   84.69    7.00
   3  15  -3   26.90   17.00
  -3  15   3    7.00    6.00
   3  15  -3    8.40    8.70
   3 -15  -3   10.30    5.80
   3 -15  -3    7.60    5.10
  -3 -15   3   13.30    8.40
   3 -15  -3   14.10    9.00
   5  15  -5    7.40    8.40
  -5  15   5   -1.10    9.60
   5  15  -5    7.70   14.70
   5 -15  -5   19.60   10.00
  -5 -15   5    1.00    7.30
   5 -15  -5    6.80    7.30
   7  15  -7  107.69   27.40
   7 -15  -7   98.09   18.10
   7 -15  -7  114.99   15.80
  -7 -15   7  124.09   16.30
  -9 -15   9   11.00   10.20
   9 -15  -9   15.20   10.60
   9 -15  -9    4.40   11.50
   0  16   0   72.99   18.10
   0 -16   0   58.69   13.10
  -2  16   2   58.79   16.60
   2  16  -2   85.39   20.30
  -2 -16   2   64.69   12.70
   2 -16  -2   67.49    7.80
   2 -16  -2   65.49    8.40
   2 -16  -2   54.49   11.60
   4  16  -4  246.48   37.00
  -4  16   4  289.77   22.70
   4 -16  -4  329.07   21.90
  -4 -16   4  341.57   25.80
   4 -16  -4  338.47   27.90
   4 -16  -4  306.07   21.60
   6  16  -6   24.00   11.60
   6  16  -6   33.70   21.40
   6 -16  -6   28.50   11.90
   6 -16  -6   20.40    9.80
  -6 -16   6   25.50    9.50
   8  16  -8   29.90   23.40
   8  16  -8   20.40   11.50
   8 -16  -8    9.40   12.20
  -8 -16   8   25.40   11.60
   8 -16  -8   33.40   12.00
   1  17  -1  210.28   33.40
  -1  17   1  211.18   32.20
   1 -17  -1  212.18   25.30
  -1 -17   1  185.78   22.80
  -3  17   3  452.95   41.70
   3  17  -3  377.06   46.30
  -3 -17   3  398.36   30.50
   3 -17  -3  412.46   23.00
   3 -17  -3  392.06   22.30
   3 -17  -3  334.57   30.60
   5  17  -5  254.67   39.70
  -5  17   5  276.67   26.10
   5 -17  -5  270.87   28.20
   5 -17  -5  302.97   23.50
   5 -17  -5  289.37   23.60
  -5 -17   5  327.07   27.10
   7  17  -7   -9.00   20.90
   7 -17  -7    7.40   11.70
   7 -17  -7    4.90   10.30
  -7 -17   7    7.90   11.20
   0  18   0   54.09   21.20
   0 -18   0   81.79   16.80
  -2  18   2   70.69   22.60
   2  18  -2   77.99   22.80
   2 -18  -2   59.29    6.80
  -2 -18   2   49.40   13.50
   2 -18  -2   38.30   12.80
   2 -18  -2   71.39    7.70
   4  18  -4  -22.30   17.90
   4 -18  -4   41.20    9.20
  -4 -18   4   48.30   12.60
   4 -18  -4   41.10   13.40
   4 -18  -4   22.90    8.70
   6  18  -6    0.20   23.70
   6 -18  -6    7.70   17.50
   6 -18  -6    3.00   10.00
  -6 -18   6    6.30   11.00
  -1  19   1   57.19   22.10
   1  19  -1  151.78   32.10
   1 -19  -1  155.28   23.20
  -1 -19   1  135.79   22.20
   3  19  -3   14.60   19.90
   3 -19  -3    4.10    6.90
   3 -19  -3    0.80   10.90
   3 -19  -3    3.20    7.00
  -3 -19   3    8.20   10.60
   5  19  -5  -10.30   25.50
   5 -19  -5   -6.20   12.30
   5 -19  -5    0.50    8.50
   5 -19  -5    4.20   13.50
  -5 -19   5    2.30   10.70
   0  20   0   54.09   25.00
   0 -20   0   23.20   12.10
   2  20  -2   18.50   25.60
  -2  20   2   42.50   20.40
  -2 -20   2    6.20   10.50
   4  20  -4  165.68   35.30
   4 -20  -4  112.89   14.50
   4 -20  -4   96.39   19.30
  -4 -20   4  110.99   20.60
  -1  21   1   20.40   20.30
   1  21  -1   -5.30   21.10
  -1 -21   1   17.00   15.70
   1 -21  -1   25.30   13.50
  14   0 -13   12.20   13.80
  12   0 -11  -12.40    8.50
  10   0  -9    3.20    3.10
  10   0  -9    0.70    6.90
  10   0  -9    8.10    5.00
  -8   0   7    7.20    4.50
  -8   0   7    9.90    6.80
   8   0  -7    0.90    5.30
   8   0  -7    5.80    3.00
  -6   0   5    5.80    2.60
   6   0  -5    0.70    3.90
  -6   0   5   10.70    4.90
   6   0  -5    3.50    1.90
  -4   0   3   31.30    4.20
   4   0  -3   26.50    3.40
   4   0  -3   36.30    5.80
  -4   0   3   51.39    7.00
   2   0  -1    0.10    0.80
  -2   0   1    0.70    0.90
  -2   0   1    0.40    1.60
   2   0  -1   -1.50    1.10
   2   0  -3   -0.40    1.40
  -2   0   3    0.30    1.30
  -2   0   3    0.80    0.80
   2   0  -3    0.70    0.60
   4   0  -5   18.50    4.40
  -4   0   5   27.00    5.50
   4   0  -5   17.50    2.40
  -4   0   5   20.40    2.70
  -6   0   7    9.50    2.90
  -6   0   7    8.60    5.00
   6   0  -7    9.00    4.50
   6   0  -7    5.80    1.90
   8   0  -9    0.40    2.20
   8   0  -9    9.50    5.80
  -8   0   9    3.00    3.50
  -8   0   9   10.00    6.90
  10   0 -11   46.60    5.30
  10   0 -11   37.90   11.30
  10   0 -11   39.00    4.10
  12   0 -13   -8.50    8.50
  13   1 -12   84.19   16.20
  13  -1 -12   95.09   18.50
 -11   1  10  152.98   15.90
  11   1 -10  162.98   20.60
  11  -1 -10  139.69   10.40
  11  -1 -10  124.59   18.50
   9   1  -8   28.20    8.90
  -9   1   8   14.50    6.60
  -9   1   8    2.70    8.00
   9   1  -8   13.70    2.70
   9   1  -8   18.50    3.80
   9  -1  -8   14.20    4.10
   9  -1  -8    6.20    6.00
  -9  -1   8   16.30    8.50
  -7   1   6   14.70    6.20
   7   1  -6   15.10    4.80
   7   1  -6   22.20    3.40
  -7   1   6   16.80    3.80
   7   1  -6   11.80    5.90
   7  -1  -6   19.30    4.30
   7  -1  -6   10.90    6.40
  -7  -1   6   11.50    6.30
  -5   1   4   61.49    6.70
  -5   1   4   63.69    8.60
   5   1  -4   67.39    9.00
   5   1  -4   58.19    4.60
  -5  -1   4   53.99    7.80
   5  -1  -4   59.59    5.60
   5  -1  -4   73.29    9.70
  -5  -1   4   45.00    6.10
   3   1  -2   21.20    2.70
  -3   1   2   16.50    3.70
  -3   1   2   24.60    3.50
   3   1  -2   12.40    3.10
   3   1  -2   16.90    3.10
   3  -1  -2   19.20    3.90
   3  -1  -2   24.60    3.30
  -3  -1   2   25.40    4.00
  -1   1   0  120.29    6.20
  -1   1   0  118.79    6.40
  -1  -1   0  121.59    5.80
  -1  -1   0  119.79    5.90
   1  -1   0  130.79    6.50
  -1   1   2  411.06   17.20
  -1   1   2  412.66   17.60
  -1  -1   2  426.36   17.10
   1  -1  -2  395.26   17.50
   3   1  -4 2042.90   75.19
  -3   1   4 1984.00   79.59
  -3   1   4 1972.10   76.99
   3   1  -4 1964.90   78.69
   3  -1  -4 1870.61   76.69
  -3  -1   4 1968.10   78.89
   3  -1  -4 1853.31   79.09
   5   1  -6  701.83   27.80
  -5   1   6  705.83   30.40
  -5   1   6  655.73   33.90
   5   1  -6  707.93   33.50
   5  -1  -6  686.63   29.70
   5  -1  -6  706.73   34.20
  -5  -1   6  681.33   29.30
  -5  -1   6  678.33   33.50
   7   1  -8  956.80   38.50
   7   1  -8  969.20   46.80
   7   1  -8  939.11   39.80
  -7   1   8  905.91   47.20
  -7   1   8  982.20   42.40
   7  -1  -8  979.20   41.00
   7  -1  -8 1020.10   47.80
  -7  -1   8  974.50   47.50
   9   1 -10  271.07   22.00
  -9   1  10  267.37   23.60
  -9   1  10  287.97   18.30
   9  -1 -10  272.47   21.60
   9  -1 -10  271.37   15.00
  -9  -1  10  268.27   22.40
  11   1 -12  157.98   20.10
  11  -1 -12  157.88    9.90
  11  -1 -12  161.98   21.90
  13   1 -14   58.39   15.40
  13  -1 -14   35.90   13.90
  14   2 -13   12.60   15.40
  14  -2 -13   12.20   13.70
  12   2 -11    6.30    8.70
 -12   2  11    2.20    9.10
  12  -2 -11   -3.10    8.90
  12  -2 -11    4.00    4.30
  10   2  -9   78.39   14.30
  10  -2  -9   51.39    7.60
  10  -2  -9   65.29   12.80
  -8   2   7  295.97   18.70
  -8   2   7  264.47   24.30
   8   2  -7  295.17   21.40
   8   2  -7  288.97   12.80
   8   2  -7  283.77   13.10
   8  -2  -7  270.37   16.50
   8  -2  -7  283.27   21.60
  -8  -2   7  303.27   21.80
   6   2  -5   70.79    5.40
   6   2  -5   69.89    4.90
   6   2  -5   83.29   10.80
  -6   2   5   79.99    7.80
  -6   2   5   56.39    9.40
   6  -2  -5   65.89   10.00
  -6  -2   5   87.89   11.00
   6  -2  -5   65.49    7.30
   4   2  -3  469.95   23.90
   4   2  -3  499.75   21.10
  -4   2   3  490.05   23.30
  -4   2   3  490.25   25.10
   4   2  -3  518.25   21.90
  -4  -2   3  509.95   24.40
   4  -2  -3  497.15   25.20
   4  -2  -3  487.35   23.00
   2   2  -1   59.09    4.40
  -2   2   1   51.79    5.10
  -2   2   1   63.09    5.10
   2   2  -1   63.69    4.00
  -2  -2   1   63.59    4.60
   2  -2  -1   59.39    4.90
  -2  -2   1   56.09    4.00
   2  -2  -1   59.69    5.40
   0   2  -1  590.14   25.70
   0   2   1  624.34   27.30
   0   2   1  626.94   25.90
   0   2  -1  662.83   27.30
   0  -2   1  607.64   24.60
   0  -2  -1  641.94   27.40
   0  -2   1  602.04   26.90
   0  -2   1  648.44   25.80
   0  -2  -1  639.14   24.60
   0  -2   1  609.04   24.40
   2   2  -3  363.86   15.10
  -2   2   3  370.96   17.80
   2   2  -3  375.96   16.60
  -2   2   3  369.36   17.00
   2  -2  -3  367.96   17.00
  -2  -2   3  384.16   15.20
  -2  -2   3  349.17   16.50
   2  -2  -3  382.06   17.80
  -4   2   5  632.44   31.20
  -4   2   5  664.13   28.60
   4   2  -5  642.64   29.80
   4  -2  -5  621.34   30.80
   4  -2  -5  655.63   28.40
  -4  -2   5  611.94   29.80
  -6   2   7   52.49    8.90
  -6   2   7   57.39    7.00
  -6  -2   7   40.00    7.50
   6  -2  -7   39.20    5.50
   6  -2  -7   65.29   10.00
  -8   2   9  101.29   14.30
   8   2  -9  119.79   14.50
  -8   2   9  101.49   11.20
   8  -2  -9   88.89   12.80
  -8  -2   9  119.89   15.80
   8  -2  -9   92.49    8.70
  10   2 -11   16.90    8.10
 -10   2  11   19.90    6.80
  10  -2 -11   16.10    4.70
 -12   2  13   30.00    9.40
  12   2 -13   27.90   10.60
  12  -2 -13   16.30    5.00
  12  -2 -13   24.90   12.90
 -13   3  12    9.80   13.40
  13   3 -12    5.90    9.80
  13  -3 -12   22.80    6.70
  13  -3 -12   31.00   12.70
 -11   3  10   73.29   13.20
  11   3 -10   54.69   12.80
  11  -3 -10   49.20    8.20
  11  -3 -10   60.49   14.00
   9   3  -8  260.37   20.60
  -9   3   8  244.88   18.10
   9  -3  -8  246.58   16.20
   9  -3  -8  244.58   21.20
  -9  -3   8  219.08   20.00
   7   3  -6   43.80    3.50
   7   3  -6   42.30    8.30
   7   3  -6   45.80    3.60
  -7   3   6   39.60    8.80
  -7   3   6   29.50    7.30
  -7  -3   6   40.90    8.30
   7  -3  -6   44.50    6.90
   7  -3  -6   40.90    9.00
  -5   3   4   31.60    5.80
  -5   3   4   32.90    7.10
   5   3  -4   22.90    5.20
   5   3  -4   37.70    4.50
   5   3  -4   32.00    3.40
   5  -3  -4   27.50    5.10
   5  -3  -4   30.90    6.30
  -5  -3   4   25.90    5.30
  -3   3   2  670.43   30.30
  -3   3   2  622.24   29.20
   3   3  -2  648.54   28.30
   3   3  -2  672.33   27.20
  -3  -3   2  640.44   27.60
   3  -3  -2  661.73   29.40
  -3  -3   2  636.04   28.40
   3  -3  -2  648.44   30.00
   1   3   0 1359.06   59.69
  -1   3   0 1450.25   57.09
   1   3   0 1345.57   54.09
   1   3   0 1400.86   56.19
  -1   3   0 1375.26   55.89
  -1   3   0 1384.36   58.29
   1   3   0 1486.35   54.09
  -1  -3   0 1421.06   59.99
   1  -3   0 1362.76   56.79
   1  -3   0 1364.66   58.19
   1  -3   0 1448.96   55.99
  -1  -3   0 1441.06   56.29
   1   3  -2   14.50    1.50
  -1   3   2   15.50    2.50
  -1   3   2   16.50    3.00
   1   3  -2   19.20    4.50
  -1   3   2   17.30    3.90
   1   3  -2   12.60    2.20
   1  -3  -2   20.10    3.90
  -1  -3   2   15.50    2.60
   1  -3  -2   20.30    3.40
  -1  -3   2   20.60    4.50
  -1  -3   2   15.40    1.50
   1  -3  -2   11.30    2.10
  -3   3   4  850.51   38.70
   3   3  -4  884.61   36.90
  -3   3   4  939.71   38.10
   3   3  -4  851.71   34.80
   3  -3  -4  857.81   38.60
  -3  -3   4  880.31   35.00
   3  -3  -4  874.81   37.60
  -3  -3   4  836.22   37.00
  -5   3   6  246.58   15.10
   5   3  -6  281.37   16.40
  -5   3   6  258.37   17.40
   5  -3  -6  277.17   15.30
   5  -3  -6  267.77   17.50
  -7   3   8   25.50    6.10
  -7   3   8   14.20    6.40
   7   3  -8   26.20    6.80
   7  -3  -8   36.30    7.90
   7  -3  -8   30.70    5.80
  -7  -3   8   25.60    7.10
  -9   3  10  379.96   23.20
   9   3 -10  420.16   26.90
   9  -3 -10  350.76   20.80
  -9  -3  10  383.66   27.20
   9  -3 -10  357.66   26.80
 -11   3  12   11.00    9.00
  11   3 -12   13.50    8.80
  11  -3 -12   -0.30    8.20
  11  -3 -12   17.10    5.60
  13   3 -14   45.20   13.30
 -13   3  14   58.39   12.80
  13  -3 -14   33.40   14.00
  13  -3 -14   49.80    7.20
  12   4 -11   15.30   10.30
 -12   4  11   18.10   12.80
  12  -4 -11   31.10   12.30
  12  -4 -11   27.50    7.70
 -10   4   9   19.00    8.10
  10   4  -9   19.20    8.10
 -10  -4   9   17.50   10.30
  10  -4  -9    8.30    5.40
  10  -4  -9    6.80    7.90
  -8   4   7   89.59   11.60
  -8   4   7   74.59   13.10
   8   4  -7   48.30    9.40
   8  -4  -7   84.89   13.80
  -8  -4   7   61.99   10.60
   8  -4  -7   60.79    9.00
   6   4  -5  154.98   12.70
   6   4  -5  147.09    7.90
  -6   4   5  139.79   11.70
   6   4  -5  156.68    9.20
  -6   4   5  137.09   15.40
   6  -4  -5  136.29   11.60
  -6  -4   5  131.39   12.00
   6  -4  -5  154.78   13.90
   4   4  -3  549.45   23.60
  -4   4   3  538.65   27.90
  -4   4   3  537.75   26.80
   4   4  -3  529.85   25.40
   4  -4  -3  533.35   27.40
   4  -4  -3  531.75   26.50
  -4  -4   3  529.85   24.40
  -4  -4   3  596.04   26.00
  -2   4   1  469.55   22.50
   2   4  -1  428.46   25.90
   2   4  -1  446.26   20.70
  -2   4   1  456.05   21.70
   2   4  -1  469.85   19.30
   2  -4  -1  458.65   22.30
  -2  -4   1  470.45   19.50
   2  -4  -1  469.15   21.70
   2  -4  -1  431.06   24.10
  -2  -4   1  474.65   21.10
   0   4   1  108.69    9.80
   0   4   1  127.79    6.00
   0   4  -1  128.29    8.20
   0   4   1  118.59    8.00
   0   4  -1  116.39    9.90
   0  -4  -1  124.99    8.10
   0  -4   1  118.49    5.70
   0  -4   1  136.69    8.20
   0  -4  -1  113.19    5.80
   0  -4   1  100.99    9.30
   0  -4   1  122.59    5.70
   0  -4  -1  117.29   10.10
  -2   4   3   15.30    3.60
  -2   4   3   12.00    3.40
   2   4  -3    4.20    4.20
   2   4  -3   12.00    2.60
   2   4  -3   12.80    2.10
   2  -4  -3   23.60    3.90
  -2  -4   3    9.90    2.50
   2  -4  -3    8.40    3.90
  -2  -4   3   12.20    2.10
   2  -4  -3    9.50    3.00
  -4   4   5    9.60    3.50
  -4   4   5   10.20    4.60
   4   4  -5   11.50    3.40
   4   4  -5    4.90    1.80
   4  -4  -5    7.00    3.10
  -4  -4   5   11.00    3.60
  -4  -4   5    7.20    2.30
   4  -4  -5    5.10    3.50
  -6   4   7  174.78   15.10
   6   4  -7  146.99   12.30
  -6   4   7  154.78   12.00
  -6  -4   7  143.39   12.40
   6  -4  -7  115.99   14.10
   6  -4  -7  149.39   11.70
   8   4  -9   14.60    5.60
  -8   4   9    2.90    4.50
  -8   4   9   13.50    7.50
  -8  -4   9    8.90    6.50
   8  -4  -9    9.00    5.90
   8  -4  -9   10.10    4.60
  10   4 -11  323.77   24.30
 -10   4  11  326.67   22.50
  10  -4 -11  303.27   19.80
  10  -4 -11  287.47   24.80
 -12   4  13   32.20   12.70
  12   4 -13   26.70   10.00
  12  -4 -13   41.00    8.30
  12  -4 -13   52.69   13.50
 -13   5  12   -0.50   17.10
  13   5 -12    2.60   10.10
  13  -5 -12    6.50    8.00
 -11   5  10   50.89   13.30
  11   5 -10   42.10   10.60
  11  -5 -10   41.70   13.00
  11  -5 -10   54.39   10.50
   9   5  -8   60.89   11.60
  -9   5   8   54.59   10.50
  -9  -5   8   21.50   11.20
   9  -5  -8   54.59    9.10
   9  -5  -8   65.69   13.40
  -7   5   6   19.60    6.70
  -7   5   6   26.90    8.40
   7   5  -6   33.30    3.60
   7   5  -6   25.00    6.80
   7   5  -6   29.10    3.70
   7  -5  -6   37.40    8.80
  -7  -5   6   23.90    7.50
  -5   5   4  139.19   11.30
   5   5  -4  117.39    7.80
   5   5  -4  135.59   10.20
  -5   5   4  144.69   12.40
  -5  -5   4  125.79    9.20
  -5  -5   4  115.89    9.70
   5  -5  -4  133.99   12.30
   5  -5  -4  113.89   10.60
  -3   5   2 1379.06   60.09
   3   5  -2 1444.16   56.99
   3   5  -2 1384.36   57.89
  -3   5   2 1479.05   60.89
   3   5  -2 1386.26   66.99
   3  -5  -2 1429.56   59.99
   3  -5  -2 1416.76   64.29
  -3  -5   2 1434.46   57.29
  -3  -5   2 1438.46   58.39
   3  -5  -2 1382.76   60.39
   1   5   0  444.36   20.80
  -1   5   0  453.75   21.70
  -1   5   0  419.76   19.30
  -1   5   0  446.46   23.70
   1   5   0  403.06   24.50
   1  -5   0  410.56   19.10
  -1  -5   0  417.56   20.70
   1  -5   0  421.46   21.30
  -1  -5   0  423.66   25.00
   1  -5   0  444.06   23.80
  -1   5   2  552.34   25.80
  -1   5   2  533.05   23.50
   1   5  -2  536.45   29.30
   1   5  -2  579.04   24.90
  -1   5   2  500.05   27.70
  -1  -5   2  554.74   29.30
  -1  -5   2  526.55   24.60
   1  -5  -2  478.25   22.90
   1  -5  -2  511.65   27.90
   1  -5  -2  573.64   25.80
  -3   5   4   60.09    7.50
   3   5  -4   63.49    5.10
   3   5  -4   54.19    5.20
   3   5  -4   47.10   10.70
  -3   5   4   51.29    6.90
   3  -5  -4   66.59    7.90
  -3  -5   4   54.09    4.90
   3  -5  -4   53.69    6.80
   3  -5  -4   54.69   11.30
   5   5  -6    2.20    3.10
   5   5  -6    5.30    2.20
  -5   5   6    3.00    3.80
  -5   5   6    2.40    3.80
   5  -5  -6    7.50    3.70
   5  -5  -6    4.20    4.50
  -5  -5   6    5.20    2.60
  -5  -5   6    7.20    3.20
  -7   5   8   40.30   10.40
  -7   5   8   52.09    8.40
   7   5  -8   50.69    9.00
   7  -5  -8   42.90    8.80
   7  -5  -8   34.70    9.20
  -7  -5   8   44.10    8.50
   9   5 -10  165.58   18.30
  -9   5  10  159.18   15.00
   9  -5 -10  122.69   16.90
   9  -5 -10  125.69   13.00
  -9  -5  10  167.98   21.10
 -11   5  12   48.70   12.20
  11  -5 -12   50.59   13.20
  11  -5 -12   37.10    8.70
  13   5 -14    7.60   10.30
 -13   5  14   -6.30   19.10
  13  -5 -14   -6.80    6.20
  13  -5 -14   12.30   13.60
  12   6 -11   -4.60    8.30
  12  -6 -11   -0.20    6.20
  12  -6 -11   20.30   11.50
  10   6  -9  126.49   16.00
 -10   6   9  117.19   15.90
  10  -6  -9  140.89   15.50
 -10  -6   9  128.49   17.10
  10  -6  -9   92.79   15.70
   8   6  -7    5.00    1.90
   8   6  -7   10.50    2.00
   8   6  -7    7.00    6.20
  -8   6   7   -4.40    7.40
  -8   6   7    9.10    6.00
  -8  -6   7   -5.20    4.90
   8  -6  -7   10.80    5.40
   8  -6  -7   12.20    6.60
  -6   6   5 2456.85  109.79
   6   6  -5 2631.14  102.39
  -6   6   5 2614.64  108.59
   6   6  -5 2695.93  105.99
  -6  -6   5 2570.94  106.29
   6  -6  -5 2635.94  108.09
   6  -6  -5 2479.45  109.49
  -6  -6   5 2616.84  104.69
   4   6  -3   52.99    5.80
  -4   6   3   52.89    8.30
  -4   6   3   46.40    7.50
   4   6  -3   60.09    6.50
   4  -6  -3   70.99   12.20
   4  -6  -3   55.19    8.20
  -4  -6   3   58.79    6.80
   4  -6  -3   47.20    8.50
  -4  -6   3   57.39    6.30
   2   6  -1   15.10    1.50
  -2   6   1   10.20    3.60
  -2   6   1   16.90    5.80
   2   6  -1   14.70    3.60
   2   6  -1   10.70    5.10
   2   6  -1   17.50    1.60
   2  -6  -1   16.80    5.60
   2  -6  -1   10.70    3.00
   2  -6  -1   15.50    4.10
  -2  -6   1   10.70    3.30
   0   6   1  145.49   13.30
   0   6  -1  145.89   10.40
   0   6   1  125.19    9.80
   0   6   1  130.79    6.90
   0   6  -1  150.68   13.10
   0  -6   1  152.88   13.30
   0  -6  -1  123.89   12.30
   0  -6   1  139.89    6.60
   0  -6   1  130.89    6.60
   0  -6   1  117.19    9.50
   0  -6  -1  125.29    6.80
   0  -6  -1  144.89   10.30
   2   6  -3    6.70    3.00
  -2   6   3   13.80    6.00
   2   6  -3    9.10    1.50
   2   6  -3    7.10    5.80
  -2   6   3   13.20    3.60
  -2   6   3   11.30    6.70
   2  -6  -3    9.70    2.90
  -2  -6   3    9.20    2.90
   2  -6  -3    6.70    3.00
  -2  -6   3   12.40    1.60
   4   6  -5  182.58   10.50
   4   6  -5  165.38   10.10
  -4   6   5  159.88   13.30
   4   6  -5  175.68   25.80
  -4   6   5  161.78   13.10
  -4  -6   5  167.28   10.40
   4  -6  -5  184.18   13.40
   4  -6  -5  159.58   12.80
   4  -6  -5  153.58   15.80
  -4  -6   5  155.48   10.30
   6   6  -7    0.70    2.10
  -6   6   7    4.80    5.60
  -6   6   7    0.70    4.30
   6   6  -7    2.20    4.20
  -6  -6   7    1.50    3.60
   6  -6  -7    0.80    5.30
   6  -6  -7    8.90    4.80
  -6  -6   7    2.90    2.60
  -8   6   9   99.49   15.00
  -8   6   9  147.29   14.40
   8   6  -9  139.59   14.80
  -8  -6   9  128.99   15.10
   8  -6  -9  116.19   15.20
   8  -6  -9  109.19   13.20
  10   6 -11  296.27   23.10
 -10   6  11  284.17   23.30
  10  -6 -11  292.57   20.80
  10  -6 -11  226.28   26.00
 -10  -6  11  290.27   24.90
 -12   6  13  196.78   23.20
  12   6 -13  183.38   22.10
  12  -6 -13  161.78   16.90
  12  -6 -13  220.88   27.10
  13   7 -12   41.70   14.10
  13  -7 -12   26.10    9.90
  13  -7 -12   18.40   13.80
  11   7 -10    3.90    8.30
 -11   7  10   14.60   11.50
  11  -7 -10    3.90    8.60
  11  -7 -10   14.70    8.20
  -9   7   8  125.29   16.20
   9   7  -8  128.39   14.90
   9  -7  -8   96.19   15.70
   9  -7  -8   98.09   13.50
  -9  -7   8  125.59   16.20
   7   7  -6  509.65   25.80
   7   7  -6  438.26   25.90
  -7   7   6  419.06   27.00
   7   7  -6  450.05   20.60
  -7   7   6  427.76   32.80
   7  -7  -6  421.66   28.00
  -7  -7   6  424.26   25.30
   7  -7  -6  435.56   26.70
   5   7  -4  873.31   36.90
   5   7  -4  854.31   36.70
  -5   7   4  803.72   41.10
  -5   7   4  816.62   41.20
   5   7  -4  785.02   50.29
  -5  -7   4  815.12   37.20
   5  -7  -4  796.82   46.30
  -5  -7   4  847.32   37.60
   5  -7  -4  827.02   40.90
   5  -7  -4  818.82   40.80
  -3   7   2   56.09    8.50
   3   7  -2   58.39    3.90
   3   7  -2   52.89    3.90
   3   7  -2   47.20   10.60
   3   7  -2   54.89    6.80
  -3   7   2   40.30    6.60
   3  -7  -2   42.00    8.90
   3  -7  -2   57.49    8.50
  -3  -7   2   44.20    6.60
   3  -7  -2   47.60    7.10
   1   7   0    6.20    3.40
  -1   7   0   14.80    5.60
  -1   7   0   12.70    3.00
   1   7   0    8.60    5.50
  -1   7   0   11.50    4.10
  -1  -7   0    7.40    4.00
   1  -7   0    7.90    3.90
  -1  -7   0    8.10    5.80
   1  -7   0   13.30    5.80
   1  -7   0   13.00    3.00
  -1   7   2    6.40    3.40
  -1   7   2    3.10    4.80
  -1   7   2    5.00    2.50
   1   7  -2    6.40    5.70
   1   7  -2   -3.30    2.50
   1  -7  -2    4.30    3.40
  -1  -7   2    1.90    2.90
   1  -7  -2    2.80    4.50
  -1  -7   2   -5.30    4.20
   1  -7  -2    2.50    2.20
  -3   7   4   85.99   10.30
  -3   7   4   88.79    8.60
   3   7  -4   89.19    5.60
   3   7  -4   85.29    7.90
   3   7  -4  108.29   16.80
   3  -7  -4   91.89   10.80
   3  -7  -4  104.69   14.70
  -3  -7   4   83.79    8.10
  -3  -7   4   94.79    5.80
   3  -7  -4   94.99    8.90
   5   7  -6   28.80    5.10
   5   7  -6   37.00   12.20
  -5   7   6   31.70    8.10
  -5   7   6   12.00    5.80
   5   7  -6   27.60    4.70
  -5  -7   6   25.70    5.00
   5  -7  -6   29.10    6.70
   5  -7  -6   22.50    9.30
   5  -7  -6   21.50    6.50
  -5  -7   6   32.80    5.00
  -7   7   8   -1.80    7.00
   7   7  -8    3.90    4.10
  -7   7   8   -5.60    4.50
   7   7  -8    9.20    2.70
   7  -7  -8    3.10    5.70
   7  -7  -8   12.30    5.80
  -7  -7   8   18.00    5.70
   9   7 -10  164.88   15.60
  -9   7  10  119.69   16.40
  -9  -7  10  156.58   18.10
   9  -7 -10  142.59   16.30
 -11   7  12    1.30   12.00
  11   7 -12    6.10    8.70
  11  -7 -12   -3.90    7.80
  11  -7 -12    5.10    7.00
  13   7 -14   57.39   16.30
  13  -7 -14   68.19   13.20
  13  -7 -14   61.39   17.50
  12   8 -11   23.40   10.10
  12  -8 -11   19.10   10.20
  12  -8 -11    3.80   10.90
  10   8  -9   75.49   12.40
 -10   8   9   69.29   14.00
  10  -8  -9   57.19   11.60
  10  -8  -9   62.59   13.70
 -10  -8   9   62.39   13.90
  -8   8   7  102.89   17.30
   8   8  -7  102.49    7.30
   8   8  -7   93.79   12.10
   8   8  -7   59.99    8.70
  -8  -8   7   55.39   10.30
   8  -8  -7   95.79   13.70
   8  -8  -7   72.19   12.90
   6   8  -5   72.59   16.90
   6   8  -5  104.29    8.70
   6   8  -5   87.09    9.50
  -6   8   5   99.79   12.60
  -6   8   5   95.19   12.80
  -6  -8   5  104.09   10.80
   6  -8  -5   92.69   13.20
   6  -8  -5   88.29   16.30
   6  -8  -5   83.39   11.60
  -6  -8   5   87.49   10.10
   4   8  -3  225.68   14.50
   4   8  -3  190.58   24.30
  -4   8   3  233.78   17.80
   4   8  -3  242.68   11.90
   4   8  -3  260.87   12.20
  -4   8   3  228.78   16.50
   4  -8  -3  216.38   16.00
   4  -8  -3  238.58   17.40
   4  -8  -3  211.48   20.50
  -4  -8   3  232.38   15.20
   2   8  -1  603.04   29.70
  -2   8   1  634.44   35.10
  -2   8   1  607.34   28.20
  -2   8   1  639.24   31.80
  -2  -8   1  599.34   29.70
  -2  -8   1  510.45   35.00
   2  -8  -1  597.54   34.80
   2  -8  -1  574.74   27.60
   2  -8  -1  580.54   32.60
   0   8  -1   85.99   13.30
   0   8   1   91.39   14.40
   0   8   1  103.49   11.50
   0   8   1   92.79    5.70
   0   8  -1   94.29    9.40
   0  -8  -1  112.39   11.80
   0  -8   1   92.89    5.10
   0  -8   1  104.49   14.50
   0  -8   1   82.89    5.10
   0  -8  -1   68.59   11.70
   0  -8  -1   81.69    5.30
   0  -8   1   71.69    9.20
   2   8  -3  121.19   10.70
  -2   8   3  111.99    9.60
  -2   8   3  141.39   12.20
  -2  -8   3  126.09   10.80
   2  -8  -3  149.79   15.40
   2  -8  -3  121.59    9.30
   2  -8  -3  130.19   12.00
  -2  -8   3  121.79   16.40
   4   8  -5   28.50    5.30
  -4   8   5   17.70    5.00
  -4   8   5   29.20    7.60
   4   8  -5   18.30    8.90
   4   8  -5   20.50    3.80
  -4  -8   5   27.00    5.70
   4  -8  -5   14.10    5.10
   4  -8  -5   21.30    6.10
  -4  -8   5   24.00    4.10
   4  -8  -5   20.10    7.80
  -6   8   7  125.79   14.30
   6   8  -7  107.09   20.60
   6   8  -7  119.59   10.30
   6   8  -7  113.49    9.10
  -6   8   7  124.09   15.30
   6  -8  -7  139.09   15.40
  -6  -8   7  127.79   10.20
   6  -8  -7  124.29   14.20
  -6  -8   7  102.89   10.20
   8   8  -9   23.60    7.30
   8   8  -9   27.20    3.20
  -8   8   9   46.60    9.50
   8   8  -9   24.90    3.80
   8  -8  -9   37.10    9.40
   8  -8  -9   31.40    9.40
  -8  -8   9   27.80    8.20
  10   8 -11    6.90    6.90
 -10   8  11    2.40    9.90
 -10  -8  11    6.50    9.20
  10  -8 -11   -5.40    8.50
  10  -8 -11    4.70    6.70
  12   8 -13   27.60   11.50
  12  -8 -13   29.90   13.90
  12  -8 -13    8.60    9.00
  11   9 -10   -8.70   19.10
  11   9 -10   16.20    9.00
  11  -9 -10   24.00    9.40
  11  -9 -10   18.10   11.20
   9   9  -8  360.36   18.40
   9   9  -8  405.66   25.00
   9   9  -8  368.46   45.30
  -9   9   8  345.37   28.40
   9   9  -8  369.76   17.40
   9  -9  -8  436.66   30.30
  -9  -9   8  429.56   26.60
   9  -9  -8  381.76   26.60
   7   9  -6   26.70    6.30
   7   9  -6   28.90    5.20
  -7   9   6    5.50    8.10
   7   9  -6    9.60   11.90
  -7   9   6   29.60   10.20
   7  -9  -6   26.60    8.60
  -7  -9   6    7.30    5.60
   7  -9  -6   18.00    7.70
  -7  -9   6   22.00    6.60
   7  -9  -6    9.30   11.00
  -5   9   4   18.80    6.70
   5   9  -4   18.40    5.20
   5   9  -4    4.90    7.40
   5   9  -4   25.10    4.50
  -5   9   4    9.80    6.40
   5   9  -4   22.00    3.90
   5  -9  -4   29.60   10.90
   5  -9  -4   15.20    7.10
  -5  -9   4   43.80    7.40
   5  -9  -4   31.60    7.20
  -3   9   2  104.79   10.50
  -3   9   2   85.79   12.20
   3   9  -2  117.59   19.30
   3   9  -2  116.09   10.70
   3  -9  -2  103.19    9.90
  -3  -9   2  120.29   11.30
   3  -9  -2  121.79   12.40
   3  -9  -2  126.89   17.80
  -1   9   0   24.40    4.20
   1   9   0   27.50    9.10
   1   9   0   25.60    6.60
  -1   9   0   24.60    8.50
  -1   9   0   20.10    6.40
   1  -9   0   32.70    9.20
   1  -9   0   23.80    3.70
  -1  -9   0   13.70    7.80
  -1  -9   0   22.90    7.10
   1  -9   0   43.20    8.60
  -1   9   2   24.00    6.80
   1   9  -2   18.90    5.70
  -1   9   2   29.10    4.50
  -1   9   2   23.30    8.70
   1   9  -2   19.50    9.20
  -1  -9   2   35.80    8.50
   1  -9  -2   14.00    5.70
   1  -9  -2   19.60    8.10
  -1  -9   2   11.80    5.10
   1  -9  -2   28.50    4.30
  -3   9   4  383.86   25.00
   3   9  -4  433.66   23.20
   3   9  -4  380.56   31.10
  -3   9   4  400.36   22.70
   3  -9  -4  397.76   24.60
   3  -9  -4  387.06   29.20
  -3  -9   4  438.46   23.20
   3  -9  -4  427.16   22.50
   5   9  -6  125.09   10.70
  -5   9   6  123.89   14.60
  -5   9   6   89.59   13.40
   5   9  -6  112.09   20.10
   5   9  -6  120.09    8.90
   5  -9  -6  127.79   19.70
   5  -9  -6  138.19   15.60
  -5  -9   6  126.59   11.10
  -5  -9   6  131.59    9.30
   5  -9  -6  125.89   14.50
  -7   9   8  659.03   38.90
  -7   9   8  613.84   37.20
   7   9  -8  645.64   32.10
   7   9  -8  623.24   29.70
   7   9  -8  668.53   51.09
   7  -9  -8  664.63   36.60
  -7  -9   8  664.93   31.60
   7  -9  -8  666.73   37.40
  -7  -9   8  658.03   33.20
   9   9 -10   69.89   11.10
   9   9 -10   61.99   23.50
  -9   9  10   60.59   13.80
  -9  -9  10   79.59   14.10
   9  -9 -10   56.69   11.40
   9  -9 -10   71.39   15.30
  11   9 -12   69.49   13.40
  11  -9 -12   75.59   14.00
  11  -9 -12   71.79   14.90
  12  10 -11   63.59   13.00
  12  10 -11   27.40   25.60
  12 -10 -11    3.40   14.40
  12 -10 -11   19.30   11.50
  10  10  -9  131.49   32.30
  10  10  -9  228.38   19.20
  10 -10  -9  220.68   26.20
  10 -10  -9  198.28   25.30
 -10 -10   9  279.57   29.80
   8  10  -7  366.36   45.60
   8  10  -7  361.66   19.50
   8  10  -7  344.67   23.90
   8 -10  -7  350.56   25.40
   8 -10  -7  350.06   26.00
  -8 -10   7  354.46   22.20
   6  10  -5   38.90   15.50
   6  10  -5   39.60    5.80
  -6  10   5   45.30   10.40
   6  10  -5   46.00    7.40
   6  10  -5   41.90    5.90
  -6  10   5   45.60   11.10
   6 -10  -5   33.40    8.90
   6 -10  -5   28.10   11.60
   6 -10  -5   36.40   10.30
  -6 -10   5   45.70    8.60
   4  10  -3   45.70   14.00
  -4  10   3   22.60    6.00
  -4  10   3   19.70    7.70
   4  10  -3   33.40    6.80
  -4 -10   3   25.60    6.60
   4 -10  -3   34.90    8.60
   4 -10  -3   30.10    7.00
   4 -10  -3   40.10   14.00
  -2  10   1   19.00    9.10
   2  10  -1   12.70    5.60
  -2  10   1   10.60    3.90
   2  10  -1   11.10    8.70
  -2  10   1   17.90    6.60
   2 -10  -1    9.00    4.10
   2 -10  -1   15.20    5.20
   2 -10  -1    7.60    8.20
  -2 -10   1    8.80    8.30
  -2 -10   1    7.10    4.50
   0  10  -1   14.30    6.40
   0  10   1   12.70    8.70
   0  10   1   10.30    5.70
   0  10  -1   21.30    8.60
   0 -10   1   10.00    6.70
   0 -10  -1   16.80    2.60
   0 -10   1   11.50    6.00
   0 -10   1   14.10    2.20
   0 -10   1   18.20    2.50
   0 -10  -1   23.30    6.70
   0 -10  -1   20.90    8.40
   0 -10  -1   15.40    2.80
   2  10  -3   16.00    8.50
  -2  10   3   17.20    7.00
  -2  10   3   14.40    4.30
  -2  10   3   17.90    8.30
   2  10  -3   15.70    5.60
   2 -10  -3   13.10    3.80
  -2 -10   3   22.30    9.80
   2 -10  -3    2.10    7.30
  -2 -10   3   10.90    4.90
   2 -10  -3   12.10    6.60
  -4  10   5  103.39   12.50
   4  10  -5  122.69   21.90
   4  10  -5  111.39   12.10
  -4  10   5   72.99   12.70
   4  10  -5   99.19    4.90
   4 -10  -5   85.69   11.10
   4 -10  -5  110.89   19.00
   4 -10  -5   76.59   11.60
  -4 -10   5  108.39   12.00
   6  10  -7   10.60   10.20
   6  10  -7   12.60    4.20
  -6  10   7   14.80    8.30
   6  10  -7    8.70    4.40
  -6  10   7    6.20    7.00
  -6 -10   7    2.70    4.30
  -6 -10   7   11.60    4.90
   6 -10  -7   24.70   11.40
   6 -10  -7   15.80    7.40
   6 -10  -7    6.50    6.40
   8  10  -9    9.00    5.20
   8  10  -9    9.80    4.40
   8  10  -9    5.60   16.80
   8 -10  -9    7.50    6.60
  -8 -10   9    7.30    4.80
  -8 -10   9    3.10    5.70
   8 -10  -9    7.40    7.40
  10  10 -11    7.10   22.50
  10  10 -11    8.30    7.20
  10 -10 -11    1.10    7.30
  10 -10 -11   -4.20    9.60
 -10 -10  11    9.80   11.50
  12  10 -13  -18.40   23.10
  12  10 -13    3.10    9.50
  12 -10 -13   17.90   13.40
  12 -10 -13   -3.40    9.00
  11  11 -10  140.59   17.20
  11  11 -10  178.98   34.50
  11  11 -10  160.18   18.20
  11 -11 -10  208.58   25.30
  11 -11 -10  167.48   20.70
   9  11  -8  134.09   14.50
   9  11  -8  141.79   14.20
   9  11  -8  119.59   10.50
   9  11  -8  165.48   16.70
   9  11  -8   87.29   25.70
   9 -11  -8  119.59   18.50
   9 -11  -8  103.79   17.20
   7  11  -6  560.74   28.50
   7  11  -6  556.74   69.79
   7  11  -6  558.34   26.60
   7  11  -6  515.05   25.90
  -7  11   6  495.45   34.00
   7 -11  -6  545.65   34.10
  -7 -11   6  574.64   30.70
   7 -11  -6  498.05   32.50
  -5  11   4  106.09   13.60
   5  11  -4   80.69    5.20
  -5  11   4  106.29   14.70
   5  11  -4   55.49   15.30
   5  11  -4   97.09    5.40
   5  11  -4   73.59   10.30
   5 -11  -4   82.69   17.30
  -5 -11   4   98.49   12.40
   5 -11  -4   98.59   14.30
   5 -11  -4   97.59   12.20
  -3  11   2   81.39   15.70
   3  11  -2   78.19   10.60
  -3  11   2   83.79   19.10
  -3  11   2   71.39    9.50
   3  11  -2   56.79   15.50
  -3 -11   2   98.89   12.80
   3 -11  -2   89.39   10.00
   3 -11  -2   68.29   11.90
   3 -11  -2   69.59   16.10
  -1  11   0   46.50   12.40
   1  11   0   40.30    9.00
   1  11   0   44.00   13.00
  -1  11   0   49.70    9.90
  -1 -11   0   48.20    9.80
   1 -11   0   37.30   11.00
   1 -11   0   28.20    8.60
  -1 -11   0   56.89   13.90
   1 -11   0   39.90    5.00
   1 -11   0   38.70    4.90
  -1  11   2  357.76   27.80
  -1  11   2  337.97   17.90
   1  11  -2  356.66   29.60
   1  11  -2  345.07   22.60
  -1  11   2  364.16   23.70
  -1 -11   2  350.06   29.20
   1 -11  -2  326.87   27.60
  -1 -11   2  308.67   21.90
   1 -11  -2  326.57   23.00
   1 -11  -2  356.76   17.30
   3  11  -4  929.51   56.59
  -3  11   4  914.81   43.70
   3  11  -4  931.31   45.30
   3 -11  -4  926.61   42.80
   3 -11  -4  937.31   47.60
   3 -11  -4  936.81   54.09
  -3 -11   4  953.80   45.50
   5  11  -6   38.90    7.30
  -5  11   6   37.70    8.90
  -5  11   6   27.70    9.40
   5  11  -6   55.19   16.50
   5  11  -6   46.70    4.50
   5  11  -6   41.40    3.80
   5 -11  -6   31.50   13.40
   5 -11  -6   33.70    9.30
   5 -11  -6   46.10    9.70
   7  11  -8  720.13   32.60
  -7  11   8  693.13   45.10
   7  11  -8  681.83   31.80
   7  11  -8  699.13   33.40
  -7 -11   8  662.93   34.50
   7 -11  -8  671.93   39.90
   7 -11  -8  632.54   38.20
   9  11 -10    8.20   14.20
   9  11 -10   -0.50    3.80
   9  11 -10    5.60    6.60
   9  11 -10    1.80    5.90
   9 -11 -10    0.60    7.90
  -9 -11  10   -9.40    7.50
   9 -11 -10    1.20    8.40
  11  11 -12   34.80   29.60
  11  11 -12   52.39   11.90
  11 -11 -12   54.39   14.50
 -11 -11  12   26.00   15.40
  11 -11 -12   65.89   16.30
  10  12  -9   19.00    6.00
  10  12  -9   34.70    8.40
  10  12  -9   20.40    7.80
  10  12  -9   25.10   21.60
  10  12  -9   23.50    5.20
  10 -12  -9   27.90   11.10
  10 -12  -9   41.60   13.70
   8  12  -7   41.10    8.00
   8  12  -7   45.20    7.50
   8  12  -7   35.80   22.90
  -8 -12   7   41.00    9.30
   8 -12  -7   36.30   10.90
   6  12  -5   -5.30   12.80
   6  12  -5    4.60    2.60
   6  12  -5   12.10    3.00
   6  12  -5   18.30    6.20
  -6  12   5  -10.30    7.90
   6 -12  -5    7.40    6.60
   6 -12  -5   12.80    8.10
  -6 -12   5   14.20    7.10
   4  12  -3  135.29   23.60
  -4  12   3  141.89   15.60
  -4  12   3  186.28   18.80
   4  12  -3  130.69   14.80
   4 -12  -3  158.58   14.00
   4 -12  -3  151.18   18.30
  -4 -12   3  148.89   16.70
   4 -12  -3  162.18   24.50
   2  12  -1  355.16   24.30
  -2  12   1  369.56   25.80
   2  12  -1  386.86   33.00
  -2  12   1  324.87   19.70
  -2  12   1  368.26   30.90
   2 -12  -1  363.06   25.30
   2 -12  -1  362.86   19.10
  -2 -12   1  383.86   24.50
  -2 -12   1  353.16   31.50
   0  12   1   49.00   11.10
   0  12  -1   38.90   13.10
   0  12   1   67.99   16.20
   0  12  -1   37.40    9.80
   0 -12  -1   45.50    4.20
   0 -12   1   35.90    8.60
   0 -12  -1   44.50    3.60
   0 -12  -1   53.59   13.50
   0 -12   1   32.30   12.90
   0 -12  -1   46.50    9.50
  -2  12   3   63.09   14.70
  -2  12   3   30.20    9.40
   2  12  -3   41.20    8.60
  -2  12   3   42.40    7.10
   2  12  -3   38.80   14.00
   2 -12  -3   27.00    8.50
  -2 -12   3   30.70   12.20
   2 -12  -3   42.90    6.40
   2 -12  -3   27.00   11.20
  -2 -12   3   52.59   10.00
   4  12  -5  168.18   15.50
  -4  12   5  193.68   21.60
  -4  12   5  165.18   15.50
   4  12  -5  109.29   20.90
  -4 -12   5  166.68   15.60
   4 -12  -5  159.88   24.90
   4 -12  -5  144.49   18.60
   4 -12  -5  176.18   14.40
   6  12  -7   57.19   18.90
   6  12  -7  109.89    7.20
  -6  12   7  172.58   19.50
   6  12  -7   90.09    7.70
   6  12  -7  128.59   13.50
   6 -12  -7  121.39   17.70
   6 -12  -7  105.79   14.20
  -6 -12   7  115.39   13.90
   8  12  -9   11.70    5.00
   8  12  -9   -3.50   15.80
   8  12  -9   -6.40    4.90
   8  12  -9    0.10    5.10
  -8 -12   9   -2.50    5.30
   8 -12  -9   14.00   10.10
   8 -12  -9    0.70    7.20
  10  12 -11   84.49   12.70
  10  12 -11   13.50   20.60
  10  12 -11   88.49   12.20
  10 -12 -11   98.89   18.00
  10 -12 -11   56.19   13.40
  11  13 -10  130.49   16.00
  11  13 -10   68.89   32.40
  11 -13 -10  122.79   17.80
  11 -13 -10  121.69   32.50
   9  13  -8   16.30    7.30
   9  13  -8   12.10   20.70
   9  13  -8   19.00    7.00
   9  13  -8   10.40    6.30
   9 -13  -8   14.80   11.60
  -9 -13   8   18.90    9.90
   9 -13  -8   23.30   11.10
   7  13  -6   74.19    6.10
   7  13  -6   72.49   22.30
   7  13  -6   68.89   11.00
   7  13  -6   65.89    6.40
   7 -13  -6   65.59   13.40
  -7 -13   6   48.20   10.90
   7 -13  -6   78.99   13.40
   5  13  -4   33.10   15.20
   5  13  -4   42.10    8.50
  -5  13   4   24.20    9.60
  -5 -13   4   46.20   10.10
   5 -13  -4   31.30    8.40
   5 -13  -4   36.00   10.40
   3  13  -2   21.40   10.90
   3  13  -2   86.39   12.90
  -3  13   2   71.29   16.30
  -3  13   2   39.90    7.50
   3 -13  -2   24.50   12.60
   3 -13  -2   58.59   12.40
  -3 -13   2   66.89   11.40
   3 -13  -2   52.39    8.30
  -1  13   0   65.79   16.90
   1  13   0   27.30   12.60
   1  13   0   14.60    8.10
  -1  13   0   23.50    8.60
  -1 -13   0   20.90    8.10
   1 -13   0   23.30    4.20
  -1 -13   0   19.60   11.70
   1 -13   0   21.20    7.80
   1 -13   0   29.30   14.50
   1 -13   0   28.60    4.40
  -1  13   2    8.40    6.80
  -1  13   2   12.80    8.30
   1  13  -2   -3.70   10.60
   1  13  -2    4.40    8.50
   1 -13  -2    6.60    3.50
   1 -13  -2    8.50    7.70
   1 -13  -2    2.40   11.20
  -1 -13   2   11.00   10.20
   1 -13  -2    1.80    2.60
  -1 -13   2   13.00    5.20
   3  13  -4    8.50   11.00
   3  13  -4   -0.90    5.60
  -3  13   4    0.80    5.30
  -3  13   4    8.10   10.10
   3 -13  -4   -0.70    6.00
   3 -13  -4    9.00   11.40
  -3 -13   4   -0.40    4.50
   3 -13  -4   -1.90    4.20
   5  13  -6   93.69   13.00
   5  13  -6   54.19   17.90
  -5  13   6   92.19   12.70
   5 -13  -6   91.09   15.30
   5 -13  -6   55.79    9.80
  -5 -13   6   64.39   10.50
   7  13  -8   15.80    7.40
   7  13  -8   14.30    4.20
   7  13  -8    8.10   16.90
   7  13  -8   18.20    3.80
   7 -13  -8    1.00    7.20
  -7 -13   8   13.20    7.50
   7 -13  -8    7.90    9.30
   9  13 -10   59.19   24.00
   9  13 -10   28.30    7.20
   9  13 -10   19.40    7.10
   9 -13 -10   34.00   10.20
  -9 -13  10   44.90    9.80
   9 -13 -10   -0.30    9.90
  11  13 -12  118.29   34.70
  11  13 -12  101.69   14.00
  11 -13 -12   99.59   17.60
  11 -13 -12  146.89   26.00
  10  14  -9   -8.40   22.30
  10  14  -9   17.80    7.30
  10  14  -9   27.40   11.50
  10 -14  -9   16.40   11.10
  10 -14  -9   11.30   13.20
   8  14  -7  178.38   33.30
   8  14  -7  212.28   18.80
   8 -14  -7  170.88   23.30
  -8 -14   7  198.18   19.80
   8 -14  -7  182.78   21.90
   6  14  -5   69.59   21.10
  -6  14   5   44.90   13.20
   6  14  -5   85.69   13.30
  -6 -14   5   55.19   10.80
   6 -14  -5   61.09   14.30
   6 -14  -5   54.59   11.80
   4  14  -3  622.74   52.89
   4  14  -3  708.03   38.60
  -4  14   3  691.23   36.60
   4 -14  -3  649.04   34.30
  -4 -14   3  642.24   37.90
   2  14  -1  154.28   26.50
   2  14  -1  141.89   17.90
  -2  14   1  140.89   22.90
   2 -14  -1  194.28   21.70
   2 -14  -1  188.58   12.20
  -2 -14   1  151.88   18.40
   2 -14  -1  189.68   12.80
   0  14   1  171.78   20.70
   0  14  -1  159.18   19.70
   0  14   1  179.18   26.20
   0  14  -1  126.99   23.30
   0 -14   1  180.28   27.40
   0 -14  -1  128.09   16.70
   0 -14   1  128.69   16.70
   2  14  -3   -4.40   10.90
  -2  14   3    5.50   10.20
  -2  14   3   21.40    5.70
   2  14  -3   16.10    8.30
   2 -14  -3    7.10    8.50
  -2 -14   3    6.60    6.10
   2 -14  -3   21.50    5.10
  -4  14   5   17.30    8.30
   4  14  -5   21.10   15.80
   4  14  -5   23.80    9.40
  -4 -14   5   10.70    6.80
   4 -14  -5    0.00    5.10
   6  14  -7   18.00    8.00
   6  14  -7    3.60   14.60
  -6  14   7   23.70   10.70
   6 -14  -7   15.30    8.50
  -6 -14   7   17.60    7.60
   6 -14  -7    8.00   10.10
   8  14  -9  157.68   16.70
   8  14  -9  181.98   10.20
   8  14  -9  145.39   10.10
   8  14  -9  143.79   36.10
   8 -14  -9  178.88   21.30
   8 -14  -9  179.38   22.70
  -8 -14   9  162.98   17.90
  10  14 -11  190.88   42.70
  10 -14 -11  288.67   30.70
  10 -14 -11  305.27   31.60
   9 -15  -8   18.60   11.40
  -9 -15   8   16.00   10.10
   9 -15  -8  -11.30    9.60
   7  15  -6   42.50   20.30
   7  15  -6   38.60   11.10
   7 -15  -6   35.40   10.30
   7 -15  -6   31.20   12.30
  -7 -15   6   43.10   11.20
  -5  15   4   34.10   10.30
   5  15  -4   11.30    9.40
   5  15  -4   12.90   14.80
   5 -15  -4   23.50   11.20
   5 -15  -4   24.30    8.70
  -5 -15   4   32.60   10.00
   3  15  -2   71.49   21.40
  -3  15   2  118.49   29.20
   3  15  -2   74.49   13.60
  -3 -15   2   77.99   12.80
   3 -15  -2   82.69   15.50
   3 -15  -2  102.79   10.40
   3 -15  -2   73.19   10.20
   1  15   0  120.49   22.70
  -1  15   0  125.19   25.10
   1 -15   0  166.08   20.60
  -1 -15   0  118.49   16.40
   1 -15   0  144.89    8.80
   1 -15   0  134.29    8.50
   1  15  -2    4.90   10.60
  -1  15   2   16.10   12.70
   1 -15  -2    1.30    3.40
  -1 -15   2   11.10    8.50
   1 -15  -2   -1.30    6.80
   1 -15  -2    0.90    2.80
   3  15  -4   43.70   10.50
   3  15  -4   11.80   16.10
  -3  15   4   54.39   18.40
  -3  15   4   51.49    9.30
   3 -15  -4   34.00   11.70
  -3 -15   4   48.00   11.10
   3 -15  -4   58.19   13.50
   5  15  -6   17.30    9.80
   5  15  -6   28.20   17.50
  -5 -15   6   -0.60    6.60
   5 -15  -6   21.90   10.10
   5 -15  -6   10.00    7.50
   7  15  -8   93.39   14.60
   7  15  -8   47.90   21.50
  -7 -15   8   62.59   13.40
   7 -15  -8   62.69   20.60
   7 -15  -8   82.19   16.90
   9  15 -10   13.10   27.20
  -9 -15  10    0.90    9.70
   9 -15 -10   41.30   14.60
   9 -15 -10   36.50   14.50
   8  16  -7   27.90   11.00
   8  16  -7   20.60   23.30
  -8 -16   7   17.60   10.40
   8 -16  -7   18.60   11.10
   8 -16  -7   20.10   11.80
   6  16  -5    5.30   19.30
   6 -16  -5    0.00    9.00
  -6 -16   5   17.20    9.20
   6 -16  -5   11.40    8.40
   4  16  -3  198.38   32.60
   4 -16  -3  151.28   15.40
   4 -16  -3  166.28   15.80
  -4 -16   3  186.08   21.50
   4 -16  -3  186.18   23.40
  -2  16   1   99.79   21.90
   2  16  -1  106.79   23.40
   2 -16  -1  105.59    9.60
   2 -16  -1  111.49    9.90
  -2 -16   1  102.89   16.10
   2 -16  -1   84.09   15.40
   0  16  -1  625.04   49.40
   0  16   1  741.03   51.59
   0 -16  -1  680.53   41.70
   0 -16   1  638.14   41.30
  -2  16   3   18.10   14.00
   2  16  -3    9.90   13.40
   2 -16  -3   24.70    5.50
   2 -16  -3   18.00    5.80
   2 -16  -3    9.30    8.90
  -2 -16   3   12.50    8.80
  -4  16   5   33.30    9.40
   4  16  -5   22.70   15.80
   4 -16  -5   30.10    8.60
  -4 -16   5   20.90    9.90
   4 -16  -5   31.60   11.10
   6  16  -7   11.20   11.10
   6  16  -7   42.30   20.70
  -6 -16   7   32.40   11.30
   6 -16  -7   18.80    9.90
   6 -16  -7   19.40   10.80
   8  16  -9   23.80   25.20
   8 -16  -9   40.40   15.50
  -8 -16   9   33.90   12.00
   8 -16  -9   45.40   14.50
   7  17  -6   21.90   20.70
  -7 -17   6   20.60   11.20
   7 -17  -6   40.10   14.40
   7 -17  -6   16.20   10.50
   5  17  -4    2.50   16.50
   5 -17  -4   13.40    9.90
   5 -17  -4   15.40   11.00
   5 -17  -4    1.60    7.70
  -5 -17   4    2.20   10.50
  -3  17   2   69.49   18.90
   3  17  -2   95.49   24.80
  -3 -17   2  104.99   17.70
   3 -17  -2   92.99   11.30
   3 -17  -2   92.59   10.70
   3 -17  -2   93.59   17.20
  -1  17   0  764.12   54.29
   1  17   0  744.63   55.49
   1 -17   0  642.14   43.40
  -1 -17   0  717.53   44.20
   1  17  -2   41.20   16.80
  -1  17   2   13.90   16.80
  -1 -17   2   44.90   12.50
   1 -17  -2   39.50   12.90
   3  17  -4   47.60   19.00
   3 -17  -4   57.59    8.70
   3 -17  -4   62.99   11.10
  -3 -17   4   46.60   12.50
   3 -17  -4   63.69   16.10
   5  17  -6  675.83   58.49
  -5  17   6  642.54   39.70
  -5 -17   6  602.24   39.00
   5 -17  -6  670.63   43.40
   5 -17  -6  606.14   36.40
   7  17  -8   -9.30   21.30
   7 -17  -8   12.10   11.20
  -7 -17   8    1.40   10.00
   7 -17  -8    2.50    9.90
   6  18  -5   21.90   24.50
   6 -18  -5    2.10   10.20
  -6 -18   5   12.70   11.90
   4  18  -3   58.79   22.30
   4 -18  -3   12.60    8.00
   4 -18  -3   22.40   10.90
   4 -18  -3   -3.80    7.50
  -4 -18   3   14.30    9.80
  -2  18   1    1.10   15.20
   2  18  -1   28.00   19.00
  -2 -18   1   21.00    9.30
   2 -18  -1    4.80   11.70
   2 -18  -1   11.90    4.70
   2 -18  -1    4.90    4.50
   0  18  -1   24.30   16.50
   0  18   1   31.80   17.90
   0 -18   1   22.00   11.40
   0 -18  -1   30.20   13.50
  -2  18   3  145.09   26.60
   2  18  -3  148.09   28.80
   2 -18  -3  186.48   11.30
   2 -18  -3  150.98   12.10
  -2 -18   3  181.68   24.20
   2 -18  -3  136.29   20.50
   4  18  -5  420.16   51.29
   4 -18  -5  415.96   26.50
   4 -18  -5  339.67   33.20
   4 -18  -5  461.35   26.30
  -4 -18   5  408.26   31.90
   6  18  -7   97.59   36.60
  -6 -18   7  115.29   18.60
   6 -18  -7  132.19   18.20
   5  19  -4  -20.00   22.90
   5 -19  -4   -1.90   11.70
   5 -19  -4   -7.40   11.60
  -5 -19   4    6.10   11.10
   5 -19  -4   -0.30    9.50
   3  19  -2  -12.30   18.10
   3 -19  -2    6.00    7.00
   3 -19  -2    9.20    6.70
  -3 -19   2   17.30   10.20
   3 -19  -2    4.30   10.00
   1  19   0    2.30   14.80
  -1  19   0  -12.00   16.10
   1 -19   0   -1.50    9.90
  -1 -19   0   28.30   12.50
  -1  19   2   50.89   20.70
   1  19  -2   86.19   25.40
   1 -19  -2   80.09   15.60
  -1 -19   2   56.19   15.80
   3  19  -4  201.88   35.90
   3 -19  -4  231.08   27.30
  -3 -19   4  193.38   24.60
   3 -19  -4  218.58   17.00
   3 -19  -4  239.78   16.80
   5  19  -6  -19.70   30.70
  -5 -19   6   46.10   14.40
   5 -19  -6   39.90   15.90
   5 -19  -6   63.09   16.90
   5 -19  -6   52.29   11.80
   4  20  -3    8.60   21.10
   4 -20  -3   62.49   11.80
   4 -20  -3   58.19   16.00
  -4 -20   3   70.59   17.20
  -2  20   1   12.00   18.20
   2  20  -1    8.00   22.70
  -2 -20   1   12.50   11.90
   0  20  -1    8.30   17.60
   0  20   1   17.60   17.20
   0 -20  -1  -21.40    9.00
   0 -20   1    3.30   12.00
  -2  20   3   11.70   18.70
   2  20  -3   22.60   18.60
   2 -20  -3   19.80   22.60
  -2 -20   3   13.30   10.90
   4  20  -5   11.00   22.20
   4 -20  -5   11.60    9.80
  -4 -20   5   13.10   11.90
   4 -20  -5   12.80   13.50
   1  21   0  -24.40   19.70
  -1  21   0   24.90   21.10
   1 -21   0  -10.50   12.70
  -1 -21   0   19.60   15.50
   1  21  -2    2.70   24.20
  -1  21   2   11.90   19.30
   1 -21  -2   -8.30   12.50
  14   0 -12   34.00   16.70
  12   0 -10    4.00    9.30
  12   0 -10   13.20    3.50
  12   0 -10   13.00    2.90
  10   0  -8  796.62   43.60
  10   0  -8  798.92   33.00
  10   0  -8  635.44   35.40
   8   0  -6   -1.50    5.50
   8   0  -6    4.20    3.00
  -8   0   6   -0.20    4.70
  -8   0   6    7.50    6.90
  -6   0   4  492.45   27.70
   6   0  -4  481.85   29.80
   6   0  -4  503.35   23.10
  -6   0   4  530.35   25.70
  -4   0   2   82.89    8.30
   4   0  -2   83.49    8.00
   4   0  -2   95.99    6.40
  -4   0   2   96.79    7.30
  -2   0   0   70.79    5.20
   2   0   0   63.59    5.20
  -2   0   0   75.79    5.60
   2   0   0   73.99    4.90
   2   0  -4  738.93   30.30
  -2   0   4  705.13   30.30
   2   0  -4  704.43   28.00
  -2   0   4  688.13   27.90
  -4   0   6 5571.04  219.48
  -4   0   6 5596.84  214.98
   4   0  -6 5484.85  214.58
   4   0  -6 5730.33  219.28
  -6   0   8 1827.92   80.49
   6   0  -8 1875.91   80.09
  -6   0   8 1892.51   74.49
   6   0  -8 1840.22   73.29
   8   0 -10  162.98    8.90
   8   0 -10  167.18   16.00
  -8   0  10  152.88   10.80
  10   0 -12  341.67   26.90
  12   0 -14    6.40    9.60
  13   1 -11   -5.80    9.70
  13  -1 -11   -0.70    3.10
  13  -1 -11    0.60   11.00
  13  -1 -11    1.70    3.80
  11   1  -9   18.70   10.00
 -11   1   9   27.90    9.80
  11   1  -9   34.30    3.40
  11  -1  -9   33.90    5.70
  11  -1  -9   40.60   11.70
   9   1  -7  230.58   20.20
   9   1  -7  222.38   13.90
   9   1  -7  231.58   12.10
  -9   1   7  216.98   17.00
  -9   1   7  201.98   20.50
   9  -1  -7  215.58   13.70
   9  -1  -7  212.18   19.70
  -9  -1   7  206.48   20.10
  -7   1   5  222.88   17.70
   7   1  -5  198.28   11.40
   7   1  -5  209.38   17.00
   7   1  -5  160.68   13.60
  -7   1   5  247.98   14.90
   7  -1  -5  225.78   17.60
  -7  -1   5  200.48   16.70
   7  -1  -5  232.88   13.20
  -5   1   3   92.29    8.00
   5   1  -3   92.29    6.70
  -5   1   3  111.99   11.80
   5   1  -3  101.09    9.60
  -5  -1   3  106.89    9.00
   5  -1  -3   96.39    7.50
  -5  -1   3  103.29    9.90
   5  -1  -3  103.69    9.90
  -3   1   1   12.30    2.60
   3   1  -1    7.20    2.70
   3   1  -1   14.00    2.70
   3   1  -1    8.60    2.80
  -3   1   1    9.00    2.90
  -3  -1   1    9.90    2.70
   3  -1  -1   18.60    4.30
   3  -1  -1    5.40    1.90
  -1   1  -1  237.58   11.20
  -1   1  -1  240.98   11.20
   1  -1   1  246.98   11.20
  -1  -1  -1  244.88   10.50
   1  -1   1  246.28   11.30
  -1  -1  -1  233.48   11.10
   1   1  -3  228.18    9.40
   1   1  -3  197.78    9.60
  -1   1   3  202.38    9.70
  -1   1   3  205.18   10.20
   1  -1  -3  222.18   10.20
  -1  -1   3  208.78    9.70
   1  -1  -3  207.18    9.70
  -1  -1   3  217.78    8.90
  -3   1   5 1125.49   46.10
   3   1  -5 1130.19   47.80
  -3   1   5 1192.48   48.80
   3  -1  -5 1170.08   48.60
  -3  -1   5 1166.58   48.20
   3  -1  -5 1090.89   45.90
  -5   1   7   70.89    9.20
   5   1  -7   72.69    9.20
  -5   1   7   65.29    5.80
   5   1  -7   72.69    3.70
   5  -1  -7   69.19    8.90
   5  -1  -7   64.89    5.50
  -5  -1   7   76.79    9.30
   7   1  -9 1304.37   52.69
  -7   1   9 1369.06   63.29
   7   1  -9 1354.96   61.59
  -7   1   9 1429.66   56.99
   7   1  -9 1336.27   52.29
   7  -1  -9 1365.46   55.49
   7  -1  -9 1312.37   61.99
  -7  -1   9 1327.97   62.39
  -9   1  11   14.90    5.60
  -9   1  11   25.50    9.80
   9   1 -11   29.30    9.80
  -9  -1  11   16.80    8.20
   9  -1 -11   19.30    4.30
   9  -1 -11   36.10    8.80
  11   1 -13   66.59   14.00
  11  -1 -13   64.69    5.70
  11  -1 -13   64.89    7.00
  11  -1 -13   76.39   15.10
  13   1 -15   37.10   13.60
  13  -1 -15   19.20   12.10
  14  -2 -12   -2.80   12.90
  12   2 -10   10.90    9.00
  12  -2 -10    8.10    9.40
  12  -2 -10    2.90    5.00
  10   2  -8   18.00    8.80
 -10   2   8    6.30    7.20
  10  -2  -8   43.20   11.20
  10  -2  -8   21.00    5.50
   8   2  -6  337.07   23.10
   8   2  -6  314.67   15.80
   8   2  -6  334.07   15.40
  -8   2   6  288.97   19.40
   8  -2  -6  338.47   23.50
  -8  -2   6  338.27   23.20
   8  -2  -6  329.27   18.40
   6   2  -4   18.20    6.10
   6   2  -4   19.80    3.60
   6   2  -4   12.70    2.70
  -6   2   4   18.30    4.70
  -6   2   4   29.20    6.70
  -6  -2   4   14.10    5.60
   6  -2  -4   16.30    6.00
   6  -2  -4   12.70    3.90
  -4   2   2 2103.39   84.99
   4   2  -2 2040.80   83.69
   4   2  -2 2123.09   82.49
  -4   2   2 2011.20   82.89
   4   2  -2 2127.59   81.09
   4  -2  -2 1958.00   82.39
   4  -2  -2 1918.31   84.49
  -4  -2   2 2099.19   83.79
   2   2   0   13.40    2.20
  -2   2   0   12.90    2.60
  -2   2   0   10.80    2.50
   2   2   0   19.40    2.70
   2  -2   0   16.00    3.10
  -2  -2   0   14.00    2.60
  -2  -2   0   15.70    2.60
   2  -2   0   12.50    2.60
   0   2  -2  214.68   11.20
   0   2  -2  208.98    9.20
   0   2   2  212.28   11.50
   0   2   2  223.18    9.50
   0   2  -2  224.38   10.30
   0  -2   2  201.88   10.10
   0  -2  -2  219.18   11.70
   0  -2   2  215.68    9.30
   0  -2  -2  209.78   10.30
   0  -2   2  205.38   11.00
   0  -2  -2  218.38    9.50
  -2   2   4  764.82   34.90
   2   2  -4  831.72   34.00
   2   2  -4  829.52   32.20
  -2   2   4  835.02   34.20
   2  -2  -4  851.41   34.20
   2  -2  -4  804.02   34.80
  -2  -2   4  790.42   32.10
  -2  -2   4  843.72   34.10
  -4   2   6  654.43   29.90
   4   2  -6  683.33   31.30
   4  -2  -6  706.33   32.70
  -4  -2   6  684.93   31.90
   4  -2  -6  687.13   29.90
  -6   2   8  239.98   13.60
   6   2  -8  239.38   18.10
  -6   2   8  178.58   16.10
   6  -2  -8  212.98   16.50
   6  -2  -8  223.18   12.80
  -6  -2   8  205.88   15.90
   8   2 -10  237.58   19.30
  -8   2  10  241.38   15.80
  -8   2  10  238.88   20.40
  -8  -2  10  262.17   20.70
   8  -2 -10  250.17   14.80
   8  -2 -10  279.07   20.80
  10   2 -12  264.67   23.20
 -10   2  12  314.57   19.90
  10  -2 -12  298.07   27.20
  10  -2 -12  264.87   16.10
  12   2 -14   17.40    9.40
  12  -2 -14   -0.20   11.30
  12  -2 -14   12.10    4.00
 -13   3  11   26.30   15.50
  13   3 -11   37.80   12.90
  13  -3 -11   12.90   12.30
  13  -3 -11   28.30    8.40
 -11   3   9  340.77   26.40
  11  -3  -9  357.66   28.80
   9   3  -7   65.29   11.40
  -9   3   7   64.59   16.10
  -9   3   7   84.29   11.80
  -9  -3   7   93.79   14.90
   9  -3  -7   60.99   11.50
   9  -3  -7   75.89    9.80
   7   3  -5   23.20    3.40
   7   3  -5   38.30    8.00
  -7   3   5   26.90    7.40
  -7   3   5   31.50    7.40
   7   3  -5   22.60    3.50
   7  -3  -5   24.50    7.60
  -7  -3   5   34.80    7.40
   7  -3  -5   11.40    4.30
  -5   3   3  625.54   32.40
   5   3  -3  640.74   27.30
   5   3  -3  648.64   30.90
   5   3  -3  601.74   29.00
  -5   3   3  645.44   30.70
   5  -3  -3  674.93   30.40
  -5  -3   3  660.43   31.20
   5  -3  -3  627.54   32.20
   3   3  -1   27.90    4.20
  -3   3   1   24.70    4.10
   3   3  -1   28.40    3.60
  -3   3   1   28.90    5.20
   3  -3  -1   23.80    4.60
   3  -3  -1   26.40    4.40
  -3  -3   1   30.50    4.30
  -3  -3   1   22.80    3.60
   1   3   1 1535.75   61.59
  -1   3  -1 1420.36   62.89
   1   3   1 1520.25   64.99
   1   3   1 1603.64   59.79
  -1   3  -1 1605.64   62.39
  -1   3  -1 1589.04   61.39
   1  -3   1 1506.45   61.09
   1  -3   1 1542.65   63.29
   1  -3   1 1513.95   62.29
  -1  -3  -1 1524.25   61.69
  -1  -3  -1 1510.95   65.19
  -1  -3  -1 1583.64   59.59
  -1   3   3  223.48   11.20
   1   3  -3  240.38   11.20
   1   3  -3  214.88   14.30
   1   3  -3  225.58   10.10
  -1   3   3  222.48   12.00
  -1   3   3  221.28   13.60
   1  -3  -3  238.58   11.30
  -1  -3   3  216.98    9.90
   1  -3  -3  207.98   11.80
  -1  -3   3  243.38   11.20
   1  -3  -3  257.57   14.40
  -3   3   5 3546.55  143.79
   3   3  -5 3549.84  139.39
  -3   3   5 3663.53  142.69
   3   3  -5 3755.42  141.99
  -3  -3   5 3645.54  142.09
   3  -3  -5 3536.65  143.39
   3  -3  -5 3639.54  142.49
  -3  -3   5 3664.23  139.39
   5   3  -7   13.70    4.50
  -5   3   7   12.00    3.50
  -5   3   7   15.00    5.20
  -5  -3   7   15.70    5.50
   5  -3  -7   12.80    3.60
   7   3  -9   46.40    8.70
  -7   3   9   49.99   10.80
  -7   3   9   59.19    8.30
   7  -3  -9   44.00    7.10
   7  -3  -9   54.39    9.30
  -7  -3   9   45.60    9.30
   9   3 -11 1296.47   61.49
  -9   3  11 1293.37   57.09
  -9  -3  11 1312.47   62.79
   9  -3 -11 1243.48   62.79
   9  -3 -11 1206.78   54.79
 -11   3  13   78.09   12.40
  11   3 -13   97.99   16.20
  11  -3 -13   70.09   15.00
  11  -3 -13   79.19    9.60
  13   3 -15  142.99   20.30
  13  -3 -15  166.68   27.50
  13  -3 -15  181.68   11.90
  12   4 -10   35.30   11.70
 -12   4  10   65.99   15.00
  12  -4 -10   47.10    9.60
  12  -4 -10   31.30   12.10
  10   4  -8    9.30    6.90
 -10   4   8   -0.80    7.40
  10  -4  -8   -2.40    6.60
 -10  -4   8    5.00    7.50
  10  -4  -8   -5.40    4.50
  -8   4   6  254.17   17.70
   8   4  -6  211.88   10.10
  -8   4   6  203.78   19.30
   8   4  -6  216.38   10.00
   8   4  -6  214.28   17.70
  -8  -4   6  199.38   17.90
   8  -4  -6  220.48   19.30
   8  -4  -6  194.18   15.20
  -6   4   4  707.73   38.80
   6   4  -4  802.72   37.40
   6   4  -4  740.93   34.20
   6   4  -4  781.92   32.30
  -6   4   4  757.52   37.20
   6  -4  -4  816.22   39.70
  -6  -4   4  777.12   37.40
   6  -4  -4  758.42   36.20
  -4   4   2  216.18   16.60
   4   4  -2  225.58   13.10
  -4   4   2  205.18   13.90
   4   4  -2  224.78   11.80
  -4  -4   2  235.98   12.90
  -4  -4   2  231.58   13.20
   4  -4  -2  235.38   15.10
   4  -4  -2  217.58   14.20
   2   4   0 1041.40   41.20
  -2   4   0 1079.69   44.00
   2   4   0 1027.90   48.90
   2   4   0 1024.10   43.20
   2   4   0  983.80   41.40
  -2   4   0 1039.90   44.70
  -2  -4   0 1049.79   43.40
   2  -4   0 1031.20   46.70
   2  -4   0 1018.20   44.50
   2  -4   0 1090.39   44.00
   0   4   2  560.44   25.70
   0   4  -2  537.75   25.40
   0   4   2  517.55   27.80
   0   4  -2  611.34   28.50
   0   4   2  600.04   23.40
   0  -4   2  564.54   25.60
   0  -4   2  556.74   23.20
   0  -4  -2  566.24   28.50
   0  -4   2  584.94   23.00
   0  -4   2  558.84   27.80
   0  -4  -2  583.14   25.90
   0  -4  -2  576.04   23.40
   2   4  -4   40.80    3.70
  -2   4   4   40.90    5.60
   2   4  -4   48.50    4.40
   2   4  -4   32.90    7.50
  -2   4   4   38.60    5.40
   2  -4  -4   40.20    5.20
  -2  -4   4   36.20    3.50
  -2  -4   4   45.30    4.10
   2  -4  -4   36.90    6.70
   2  -4  -4   43.00    5.60
   4   4  -6  126.59    6.80
  -4   4   6  119.99   10.90
  -4   4   6  129.59    9.90
   4   4  -6  129.69    9.30
  -4  -4   6  119.49    6.80
  -4  -4   6  118.69    9.30
   4  -4  -6  130.99   11.00
   4  -4  -6  138.59   10.00
  -6   4   8    5.70    3.90
   6   4  -8    4.00    4.50
  -6   4   8    3.40    4.80
   6  -4  -8    4.10    4.70
  -6  -4   8    4.30    3.90
   6  -4  -8    4.30    3.70
  -8   4  10  245.38   17.10
  -8   4  10  217.78   20.60
   8   4 -10  234.68   18.60
   8  -4 -10  243.68   16.00
  -8  -4  10  227.58   18.90
   8  -4 -10  190.18   18.70
 -10   4  12  877.71   44.00
  10   4 -12  861.61   47.20
  10  -4 -12  850.51   48.90
  10  -4 -12  893.71   49.99
 -12   4  14   11.40   11.00
  12   4 -14    6.60    8.90
  12  -4 -14    5.50    6.90
  12  -4 -14   -1.90    9.70
 -13   5  11  232.98   27.60
  13   5 -11  199.88   24.50
  13  -5 -11  280.17   41.70
  13  -5 -11  198.68   18.30
  11   5  -9   16.70    7.50
 -11   5   9    3.90   10.20
  11  -5  -9    7.10   10.30
  11  -5  -9   -0.20    6.30
   9   5  -7   20.00    8.00
  -9   5   7   18.50    8.30
   9  -5  -7   26.50   10.20
   9  -5  -7   14.20    6.40
  -9  -5   7   22.60    8.30
   7   5  -5   11.10    5.20
   7   5  -5   18.90    4.40
  -7   5   5   21.70    6.90
  -7   5   5   29.10    6.50
   7   5  -5   12.00    2.80
  -7  -5   5   13.00    5.60
   7  -5  -5   10.40    6.40
   7  -5  -5   21.00    6.30
   5   5  -3    3.10    2.90
  -5   5   3   10.20    4.80
   5   5  -3    5.00    2.20
  -5   5   3   -0.60    2.80
   5  -5  -3   -0.80    3.90
  -5  -5   3    3.10    3.00
  -5  -5   3    5.10    3.40
   5  -5  -3    3.00    3.70
   3   5  -1 1180.48   46.10
   3   5  -1 1120.89   55.69
  -3   5   1 1104.79   49.50
  -3   5   1 1044.00   48.70
   3   5  -1 1142.79   47.40
  -3  -5   1 1149.29   46.30
   3  -5  -1 1109.89   49.30
   3  -5  -1 1169.28   49.30
  -3  -5   1 1115.19   47.60
   3  -5  -1 1136.29   52.79
  -1   5  -1  983.10   41.60
  -1   5  -1  969.00   43.80
   1   5   1 1035.30   48.10
   1   5   1 1042.20   43.40
   1   5   1 1020.70   39.30
  -1   5  -1  992.60   45.80
  -1  -5  -1 1037.70   43.50
  -1  -5  -1  994.80   47.80
   1  -5   1 1080.49   44.40
   1  -5   1  998.10   41.50
  -1  -5  -1 1008.20   39.40
   1  -5   1  965.60   45.90
   1   5  -3   71.19   10.50
   1   5  -3   65.59    3.50
  -1   5   3   72.69    5.60
   1   5  -3   69.69    6.10
  -1   5   3   66.19    7.40
  -1   5   3   52.39    8.30
   1  -5  -3   67.09    6.80
  -1  -5   3   50.89    8.40
   1  -5  -3   65.09    5.30
   1  -5  -3   81.99   10.60
  -1  -5   3   63.79    3.30
  -1  -5   3   70.29    6.20
  -3   5   5  158.88   11.60
   3   5  -5  152.18    9.10
   3   5  -5  143.49    8.90
  -3   5   5  146.59   11.30
   3  -5  -5  171.68   11.30
   3  -5  -5  143.29   13.80
  -3  -5   5  158.78    9.20
   3  -5  -5  164.88   11.50
  -3  -5   5  150.78    9.10
  -5   5   7   22.50    5.70
   5   5  -7   21.40    3.00
  -5   5   7   10.40    5.00
   5   5  -7   21.80    4.80
   5  -5  -7   20.00    6.20
  -5  -5   7   22.70    3.60
   5  -5  -7   17.00    4.80
  -5  -5   7   21.40    5.30
   7   5  -9   -2.30    4.20
  -7   5   9    6.50    4.70
  -7   5   9    4.40    7.30
   7  -5  -9   -0.30    5.60
  -7  -5   9    8.50    5.50
   7  -5  -9    1.20    4.40
  -9   5  11  203.08   18.40
   9   5 -11  249.48   19.80
   9  -5 -11  262.47   22.40
   9  -5 -11  240.48   17.30
  -9  -5  11  209.98   20.00
  11   5 -13  395.26   28.70
 -11   5  13  375.06   27.50
  11  -5 -13  373.86   30.80
  11  -5 -13  371.76   23.90
  13   5 -15   69.59   14.90
  13  -5 -15   65.19   11.10
  13  -5 -15   55.89   16.80
 -12   6  10   26.40   14.00
  12   6 -10   19.30    9.20
  12  -6 -10   10.30    8.00
  12  -6 -10   12.20   10.40
 -10   6   8   26.20    9.80
  10   6  -8   42.80   10.20
 -10  -6   8   36.00   11.20
  10  -6  -8   20.40    6.30
  10  -6  -8   53.49   12.90
   8   6  -6   12.50    2.90
   8   6  -6    7.30    3.00
  -8   6   6   16.10    7.40
   8   6  -6   22.00    6.90
  -8   6   6    6.80    8.90
   8  -6  -6    9.30    5.80
   8  -6  -6   13.10    6.90
  -8  -6   6    8.90    6.30
  -6   6   4 1672.23   73.39
   6   6  -4 1630.14   67.49
  -6   6   4 1643.64   74.89
   6   6  -4 1708.83   70.79
   6  -6  -4 1647.74   72.59
  -6  -6   4 1672.13   70.29
   6  -6  -4 1593.94   74.29
  -6  -6   4 1764.52   71.69
  -4   6   2  621.24   32.10
   4   6  -2  672.63   29.40
  -4   6   2  645.84   32.60
   4   6  -2  667.93   28.80
   4  -6  -2  686.93   32.30
   4  -6  -2  619.84   35.90
  -4  -6   2  641.14   29.90
   4  -6  -2  614.14   32.00
  -4  -6   2  617.14   28.70
  -2   6   0 2333.37   92.79
   2   6   0 2351.66   88.89
   2   6   0 2130.49   99.69
   2   6   0 2377.16   93.29
  -2   6   0 2313.47   97.59
   2   6   0 2250.97   88.59
   2  -6   0 2395.36   94.99
   2  -6   0 2448.26   98.59
  -2  -6   0 2247.58   93.29
   2  -6   0 2172.38   92.19
   0   6  -2    4.60    4.50
   0   6   2    8.80    2.10
   0   6  -2    1.30    2.50
   0   6   2    7.60    4.50
   0   6   2    4.20    2.80
   0  -6   2    7.60    1.60
   0  -6  -2    8.20    3.50
   0  -6   2    3.70    1.40
   0  -6  -2    5.40    1.50
   0  -6  -2    2.70    4.20
   0  -6   2    6.20    2.50
   0  -6   2    4.10    3.80
  -2   6   4   57.69    9.60
   2   6  -4   62.89   11.30
  -2   6   4   49.40    7.90
   2   6  -4   61.39    6.20
   2   6  -4   52.09    4.00
  -2   6   4   50.59    6.50
   2  -6  -4   49.60    7.40
  -2  -6   4   53.79    3.70
   2  -6  -4   62.79    6.20
  -2  -6   4   61.49    6.10
   2  -6  -4   45.30    8.60
  -4   6   6   23.60    5.70
   4   6  -6   22.50    3.80
  -4   6   6   19.30    5.70
   4   6  -6   28.00    4.50
  -4  -6   6   20.90    3.70
  -4  -6   6   23.90    4.40
   4  -6  -6   24.60    8.10
   4  -6  -6   22.10    5.60
   4  -6  -6   22.10    5.70
   6   6  -8  356.26   16.20
   6   6  -8  356.86   20.60
  -6   6   8  365.66   24.30
  -6   6   8  356.86   22.20
   6  -6  -8  345.57   21.70
  -6  -6   8  371.96   17.30
   6  -6  -8  391.46   24.00
  -6  -6   8  359.26   21.20
  -8   6  10  213.88   20.30
   8   6 -10  172.38   15.60
  -8   6  10  161.98   15.30
   8  -6 -10  197.78   18.10
  -8  -6  10  176.98   16.30
   8  -6 -10  186.68   15.90
  10   6 -12   35.90   10.00
 -10   6  12   20.10    9.50
 -10  -6  12   56.39   13.40
  10  -6 -12   32.20   11.30
  10  -6 -12   38.90    9.30
 -12   6  14   41.10   14.30
  12   6 -14   30.20   11.90
  12  -6 -14   36.60    9.80
  12  -6 -14   62.29   16.60
  13   7 -11   36.20   13.20
  13  -7 -11   42.20   11.00
  13  -7 -11   43.90   16.50
 -11   7   9   78.79   16.60
  11   7  -9   47.10   11.40
  11  -7  -9   47.30   11.10
  11  -7  -9   60.89   13.00
  -9   7   7   81.79   13.60
   9   7  -7   78.19   12.50
  -9  -7   7   72.49   12.50
   9  -7  -7   81.39   12.50
   9  -7  -7   61.39   12.60
   7   7  -5   59.69    6.20
  -7   7   5   70.49   12.00
   7   7  -5   88.19   10.20
   7  -7  -5   72.29   11.20
   7  -7  -5   65.89   11.50
  -7  -7   5   68.79    9.90
  -5   7   3  445.56   25.00
   5   7  -3  363.26   31.50
   5   7  -3  381.46   20.20
  -5   7   3  447.36   25.10
   5   7  -3  396.46   20.10
   5  -7  -3  411.86   29.00
   5  -7  -3  377.26   23.70
  -5  -7   3  374.86   21.00
   5  -7  -3  391.16   23.80
  -5  -7   3  395.36   20.60
   3   7  -1  456.15   31.50
  -3   7   1  445.46   24.00
   3   7  -1  476.55   19.50
  -3   7   1  482.35   25.80
   3   7  -1  451.95   23.30
   3   7  -1  448.56   19.50
   3  -7  -1  514.25   29.40
   3  -7  -1  431.66   24.90
   3  -7  -1  423.86   23.40
  -3  -7   1  483.65   23.90
   1   7   1   33.30    8.80
  -1   7  -1   37.80    6.40
   1   7   1   51.99    8.40
  -1   7  -1   46.10    5.30
  -1   7  -1   56.69   10.20
  -1  -7  -1   63.89    8.20
   1  -7   1   49.00    5.20
  -1  -7  -1   42.60    9.40
   1  -7   1   54.49    7.90
  -1   7   3    3.10    3.10
   1   7  -3    2.20    4.50
   1   7  -3    3.00    2.50
  -1   7   3    0.30    4.30
  -1   7   3    1.00    1.80
   1  -7  -3    9.90    5.30
  -1  -7   3    0.50    2.60
  -1  -7   3    1.00    3.70
   1  -7  -3    0.70    1.90
   1  -7  -3    3.00    3.20
   3   7  -5   37.20    4.10
   3   7  -5   24.60    8.60
  -3   7   5   40.80    7.70
   3   7  -5   42.80    6.10
  -3  -7   5   25.60    5.00
   3  -7  -5   31.20    6.40
  -3  -7   5   32.50    3.70
   3  -7  -5   27.50    5.60
   3  -7  -5   29.50    8.10
   5   7  -7   56.69   15.00
   5   7  -7   96.39    8.40
  -5   7   7   73.09   10.80
  -5   7   7   85.69   11.20
   5   7  -7   86.69    7.50
   5  -7  -7  116.99   13.10
   5  -7  -7   83.89   14.80
   5  -7  -7   93.49   11.70
  -5  -7   7   94.49    8.10
  -5  -7   7   99.09    8.80
   7   7  -9    7.90    2.30
   7   7  -9    7.40    3.20
   7   7  -9    6.60    4.70
  -7   7   9    3.70    5.90
  -7   7   9    4.60    7.60
   7  -7  -9    1.20    5.30
  -7  -7   9   17.70    5.70
   7  -7  -9    9.80    6.10
  -9   7  11    3.60    7.20
   9   7 -11    5.10    5.30
   9  -7 -11    3.90    6.00
   9  -7 -11   15.40   12.10
  -9  -7  11   -0.60    7.60
  11   7 -13   -0.80    6.20
 -11   7  13    8.00   12.20
  11  -7 -13   12.90    8.30
  11  -7 -13    1.10    9.70
  13   7 -15  100.39   17.70
  13  -7 -15  104.49   14.60
  13  -7 -15   69.79   16.90
  12   8 -10   35.00   11.10
  12  -8 -10   40.90   15.60
  12  -8 -10   29.80    9.90
 -10   8   8  200.58   22.70
  10   8  -8  199.88   18.80
  10  -8  -8  188.08   23.10
 -10  -8   8  160.58   18.60
  10  -8  -8  163.28   18.80
   8   8  -6  177.18   15.20
   8   8  -6  147.39    9.90
   8   8  -6  138.29   14.60
  -8  -8   6  163.28   16.30
   8  -8  -6  115.79   16.00
   8  -8  -6  146.79   16.50
   6   8  -4   32.10    5.80
   6   8  -4   43.00    6.70
  -6   8   4   37.90    8.10
  -6   8   4   57.59   10.50
   6   8  -4   59.29   17.20
  -6  -8   4   36.70    6.70
  -6  -8   4   36.00    6.70
   6  -8  -4   54.29   10.10
   6  -8  -4   22.50   10.20
   6  -8  -4   48.40   10.10
   4   8  -2  435.86   19.60
   4   8  -2  436.36   19.50
  -4   8   2  458.15   26.40
   4   8  -2  407.26   32.40
   4   8  -2  455.75   25.20
  -4   8   2  429.26   24.80
   4  -8  -2  480.85   26.60
   4  -8  -2  391.16   23.90
   4  -8  -2  417.16   29.70
  -4  -8   2  437.16   23.50
   2   8   0   41.80   11.70
  -2   8   0   36.50    5.80
   2   8   0   44.50    7.30
  -2   8   0   38.10    7.30
  -2   8   0   20.00    6.90
  -2  -8   0   38.50    9.90
   2  -8   0   31.10    8.40
   2  -8   0   37.50    9.20
  -2  -8   0   50.29    8.00
   2  -8   0   43.10    5.90
   0   8   2   69.99    9.00
   0   8   2   60.49   11.40
   0   8   2   57.19    4.60
   0   8  -2   51.09   11.20
   0   8  -2   66.09    9.00
   0  -8   2   57.39    4.20
   0  -8   2   49.90    7.70
   0  -8   2   58.49    4.00
   0  -8  -2   66.09   12.60
   0  -8   2   79.29   13.00
   0  -8  -2   57.89    4.60
   0  -8  -2   76.09    9.70
   2   8  -4  662.83   45.90
  -2   8   4  750.32   34.60
   2   8  -4  804.12   38.80
  -2   8   4  759.72   41.70
  -2   8   4  802.02   38.00
  -2  -8   4  732.63   35.40
   2  -8  -4  735.43   33.90
  -2  -8   4  686.93   41.70
   2  -8  -4  843.42   38.20
   2  -8  -4  743.33   41.80
  -4   8   6   10.30    5.60
   4   8  -6    5.60    2.90
   4   8  -6    3.80    3.40
  -4   8   6    5.20    4.80
   4   8  -6   23.30    9.80
   4  -8  -6    3.60    7.10
  -4  -8   6    6.20    3.40
   4  -8  -6    0.70    3.90
  -4  -8   6    7.40    2.60
   6   8  -8 1068.49   43.70
  -6   8   8 1016.00   50.99
   6   8  -8  959.60   62.19
  -6   8   8  993.70   49.90
   6   8  -8 1070.59   45.60
  -6  -8   8 1031.90   44.30
   6  -8  -8 1022.90   49.60
   6  -8  -8  946.31   49.10
   6  -8  -8  955.50   56.89
  -8   8  10   45.10   11.40
   8   8 -10   26.40    7.70
   8  -8 -10   20.20    7.80
   8  -8 -10    7.50    8.70
  -8  -8  10   25.90    8.10
 -10   8  12   85.09   15.70
  10   8 -12  133.79   15.90
  10  -8 -12   82.49   16.90
  10  -8 -12   85.59   13.30
 -10  -8  12   87.69   14.90
  12   8 -14   39.80   11.60
  12  -8 -14   45.40   11.20
  12  -8 -14   25.50   14.10
  11   9  -9   27.30   20.30
  11   9  -9   65.19   12.60
  11  -9  -9   43.10   11.20
  11  -9  -9   83.59   16.60
   9   9  -7  130.79    8.90
  -9   9   7  151.58   20.30
   9   9  -7  124.89   11.80
   9   9  -7  194.88   16.40
   9   9  -7   99.09   24.40
   9  -9  -7  138.89   17.90
  -9  -9   7  176.08   18.30
   9  -9  -7  153.58   18.10
   7   9  -5  934.21   63.89
  -7   9   5 1007.30   51.89
   7   9  -5 1071.09   46.00
   7   9  -5 1031.20   44.70
  -7   9   5  965.50   52.19
   7  -9  -5  927.81   49.99
  -7  -9   5 1053.19   47.40
  -7  -9   5  994.80   46.50
   7  -9  -5 1021.30   51.49
  -5   9   3   72.69   11.50
   5   9  -3   72.09    6.50
   5   9  -3   63.69    8.30
  -5   9   3   66.49   11.10
   5   9  -3   45.90   13.80
   5   9  -3   56.99    5.90
  -5  -9   3   65.59    8.90
   5  -9  -3   83.49   11.60
   5  -9  -3   54.99   14.10
   5  -9  -3   81.59   12.20
  -3   9   1   47.70    9.10
   3   9  -1   69.89   15.20
  -3   9   1   60.19   10.00
   3   9  -1   56.99    8.60
   3  -9  -1   50.99   11.20
   3  -9  -1   66.19    8.40
  -3  -9   1   68.89    9.20
   3  -9  -1   62.09   10.30
  -1   9  -1   16.70    5.20
   1   9   1   20.60    7.00
   1   9   1   19.80    4.90
  -1   9  -1   18.70    7.20
  -1  -9  -1   16.00    7.30
   1  -9   1   18.20    5.60
   1  -9   1   17.90    3.20
   1  -9   1    8.10    5.90
   1  -9   1   18.10    3.40
   1   9  -3   33.70   10.30
  -1   9   3   21.90    8.70
   1   9  -3   31.60    7.10
  -1   9   3   28.60    6.30
  -1   9   3   25.40    4.40
   1  -9  -3   31.20    9.30
  -1  -9   3   22.90    5.90
   1  -9  -3   29.80    4.60
  -1  -9   3   34.60   10.40
   1  -9  -3   41.40    7.60
  -3   9   5  439.26   23.40
  -3   9   5  414.06   25.60
   3   9  -5  435.06   32.60
   3   9  -5  398.96   22.80
   3  -9  -5  366.16   22.10
  -3  -9   5  432.66   23.40
   3  -9  -5  467.55   26.20
   3  -9  -5  407.06   30.30
   5   9  -7   84.59   19.40
  -5   9   7   92.29   12.80
  -5   9   7  108.29   13.70
   5   9  -7   92.59    9.30
   5   9  -7   98.99    8.10
   5  -9  -7   79.29   18.30
  -5  -9   7  100.39    9.80
   5  -9  -7   83.79   11.70
  -5  -9   7   87.99    7.80
   5  -9  -7   88.89   12.60
   7   9  -9  361.56   38.50
  -7   9   9  389.86   28.00
   7   9  -9  440.66   24.00
   7   9  -9  444.76   21.40
  -7   9   9  405.06   29.60
  -7  -9   9  419.26   22.50
   7  -9  -9  416.06   28.20
  -7  -9   9  468.45   25.20
   7  -9  -9  490.15   28.90
  -9   9  11    6.00    8.90
   9   9 -11   -2.00   16.60
   9   9 -11   20.80    7.00
  -9  -9  11   18.60    9.60
   9  -9 -11   25.10   11.00
   9  -9 -11   27.70    9.30
  11   9 -13   12.20    9.40
  11  -9 -13   22.30    8.80
  11  -9 -13   44.90   13.00
  12  10 -10   60.49   29.70
  12  10 -10   21.20   11.20
  12 -10 -10   13.00   10.80
  10  10  -8    4.20    6.70
  10  10  -8    2.10    7.00
  10  10  -8    9.00   16.80
  10 -10  -8   -6.70    9.10
   8  10  -6   21.90    5.40
   8  10  -6   22.60   14.70
   8  10  -6   22.20    5.90
   8 -10  -6   28.00    8.40
   8 -10  -6   27.00    9.20
  -8 -10   6   23.30    7.70
   6  10  -4  377.66   19.00
   6  10  -4  359.96   35.90
  -6  10   4  368.86   26.90
   6  10  -4  351.16   18.80
  -6  10   4  366.26   25.90
   6  10  -4  396.46   21.90
   6 -10  -4  383.36   26.30
  -6 -10   4  368.26   22.70
   6 -10  -4  365.46   24.80
   6 -10  -4  404.26   32.80
   4  10  -2   24.80   12.10
  -4  10   2   29.50    7.00
  -4  10   2   30.70    8.80
   4  10  -2   43.70    7.90
   4 -10  -2   20.00    7.20
   4 -10  -2   16.60    6.60
   4 -10  -2   16.00   10.10
  -2  10   0   11.70    6.20
  -2  10   0   15.40    4.30
  -2  10   0   20.60    9.80
   2  10   0    8.30    5.10
   2  10   0   24.30    9.50
  -2 -10   0   -1.10    6.80
   2 -10   0    7.10    3.70
   2 -10   0   15.00    6.50
  -2 -10   0    4.30    4.30
   2 -10   0   21.40    9.10
   0  10   2   10.30    2.60
   0  10  -2   14.10    6.00
   0  10   2   18.00    6.10
   0  10  -2   15.20    8.70
   0  10   2    7.10    7.60
   0 -10  -2   16.80    6.30
   0 -10  -2    9.80    7.50
   0 -10  -2    7.60    2.50
   0 -10   2   17.50    8.70
   0 -10   2   13.60    2.00
   0 -10   2   21.30    2.80
   0 -10   2   23.30    6.60
   2  10  -4   17.80    9.80
  -2  10   4   22.30    9.10
  -2  10   4   14.60    6.20
  -2  10   4    7.80    3.60
   2  10  -4    9.10    7.70
   2 -10  -4   20.40    7.00
   2 -10  -4   20.20    4.70
  -2 -10   4    8.40    7.30
   2 -10  -4   18.50    8.90
  -2 -10   4   15.00    5.30
  -4  10   6   10.50    5.30
   4  10  -6   10.10    2.00
   4  10  -6   10.10    4.60
  -4  10   6    2.70    6.40
   4  10  -6   16.80   10.20
   4  10  -6    9.70    2.50
  -4 -10   6   11.80    5.00
   4 -10  -6    7.40    6.20
   4 -10  -6    6.50    8.20
   4 -10  -6    7.40    5.50
   6  10  -8    6.80   12.30
   6  10  -8   32.60    5.50
  -6  10   8   37.40   10.50
   6 -10  -8   40.60    9.90
  -6 -10   8   23.30    5.90
   6 -10  -8   11.80    6.90
   6 -10  -8    7.80   10.50
  -6 -10   8   31.10    5.90
   8  10 -10    9.00   15.40
   8  10 -10    9.10    3.90
   8  10 -10   10.00    5.50
  -8 -10  10    8.00    4.70
   8 -10 -10   12.30    9.60
   8 -10 -10    3.60    5.70
  -8 -10  10    1.20    6.40
  10  10 -12   17.20    8.00
  10  10 -12   27.60   21.40
 -10 -10  12    2.30   10.60
  10 -10 -12   -0.70    7.60
  10 -10 -12   15.50   12.20
  12  10 -14   20.20   26.50
  12  10 -14    1.60    9.30
  12 -10 -14    3.90   11.80
  12 -10 -14   10.50    9.90
  11  11  -9  132.89   16.10
  11  11  -9   95.39   33.10
  11  11  -9  123.49   15.10
  11 -11  -9  121.49   20.10
  11 -11  -9  125.29   18.60
   9  11  -7   31.90    6.30
   9  11  -7   17.10    6.30
   9  11  -7   27.90   17.10
   9  11  -7   43.00    8.70
   9  11  -7   41.10   10.90
   9 -11  -7   19.10   10.40
   9 -11  -7   10.60    8.20
  -7  11   5  445.16   30.40
   7  11  -5  441.86   24.70
   7  11  -5  447.16   22.50
   7  11  -5  397.06   52.29
   7  11  -5  437.16   22.30
   7 -11  -5  424.46   28.80
   7 -11  -5  412.56   29.70
  -7 -11   5  463.75   27.00
   5  11  -3   78.19   10.90
   5  11  -3   58.69    4.20
   5  11  -3   35.00   13.70
  -5  11   3   63.39   12.50
   5  11  -3   51.09    3.90
  -5  11   3   41.60    9.40
   5 -11  -3   35.60    9.10
   5 -11  -3   60.99   15.30
   5 -11  -3   64.19   10.90
  -5 -11   3   64.49   10.60
  -3  11   1   11.60    9.50
  -3  11   1   29.00   10.10
   3  11  -1   17.00   11.10
   3  11  -1   15.70    6.00
  -3  11   1    9.30    5.00
  -3 -11   1   27.80    7.00
   3 -11  -1   21.20    5.60
   3 -11  -1   11.60    8.50
   3 -11  -1    8.30    6.40
  -3 -11   1   23.70   11.50
  -1  11  -1  156.98   16.90
   1  11   1  120.09   14.20
   1  11   1  117.69   19.10
  -1  11  -1  174.28   22.30
   1 -11   1  130.49    8.50
  -1 -11  -1  108.99   13.40
   1 -11   1  143.49   13.90
   1 -11   1  127.59    8.30
   1 -11   1   90.19   15.90
  -1 -11  -1  139.89   21.40
  -1  11   3  272.57   26.60
   1  11  -3  352.36   30.10
  -1  11   3  332.77   23.60
  -1  11   3  343.07   18.00
   1  11  -3  360.06   23.00
  -1 -11   3  354.86   29.30
   1 -11  -3  333.47   29.40
   1 -11  -3  311.77   17.10
  -1 -11   3  372.26   23.10
   1 -11  -3  391.66   24.10
  -3  11   5   -2.60    4.00
   3  11  -5   13.60    6.30
   3  11  -5   -1.70    9.30
   3 -11  -5    3.60    5.00
   3 -11  -5    0.80    3.70
   3 -11  -5   21.00   15.00
  -3 -11   5    3.70    4.70
   5  11  -7  214.48   29.60
   5  11  -7  290.87   18.00
   5  11  -7  273.17   12.70
  -5  11   7  264.07   20.30
  -5  11   7  320.87   24.00
   5  11  -7  243.58   13.20
   5 -11  -7  247.08   19.10
  -5 -11   7  273.57   20.60
   5 -11  -7  239.28   21.30
   5 -11  -7  295.37   29.30
   7  11  -9  211.98   15.50
   7  11  -9  221.18   15.10
  -7 -11   9  250.67   17.00
  -7 -11   9  211.98   16.00
   7 -11  -9  193.48   19.70
   7 -11  -9  219.08   20.30
   9  11 -11   24.40    3.60
   9  11 -11   19.60    4.30
   9  11 -11    8.90    7.40
   9  11 -11   34.60   22.30
   9 -11 -11   29.90   11.40
   9 -11 -11   21.30   10.90
  -9 -11  11   16.90    9.40
  11  11 -13   94.69   14.70
 -11 -11  13  133.09   21.40
  11 -11 -13   88.39   16.40
  11 -11 -13  122.79   19.80
  10  12  -8   19.80    5.60
  10  12  -8   15.40    7.80
  10  12  -8   25.30    8.10
  10  12  -8   -0.60   19.40
  10  12  -8   23.00    8.00
  10 -12  -8    1.50   10.40
  10 -12  -8   22.30   11.40
   8  12  -6    6.40    4.90
   8  12  -6    1.20    5.70
   8  12  -6   26.50   18.90
   8 -12  -6    0.00    7.50
   8 -12  -6   14.90   14.90
  -8 -12   6    1.40   10.50
   6  12  -4   -4.20   11.50
   6  12  -4    2.30    5.60
   6  12  -4    9.50    3.00
  -6  12   4    3.40    7.90
   6  12  -4   10.70    2.70
   6 -12  -4   26.90    8.70
  -6 -12   4   14.70    7.20
   6 -12  -4    6.90    7.40
   4  12  -2  912.21   57.19
  -4  12   2  834.42   41.90
   4  12  -2  785.12   41.60
  -4  12   2  744.73   44.60
   4 -12  -2  843.22   40.50
  -4 -12   2  889.81   43.50
   4 -12  -2  847.72   45.20
   4 -12  -2  816.42   51.79
   2  12   0   25.00   12.10
  -2  12   0   63.29   15.20
  -2  12   0   36.40    9.10
   2  12   0   45.00    9.20
   2 -12   0   45.20   13.10
   2 -12   0   26.40    8.20
  -2 -12   0   43.60   13.20
   2 -12   0   47.40    6.00
  -2 -12   0   26.40    8.10
   2 -12   0   37.10    5.90
   0  12  -2   34.00    8.80
   0  12   2   81.29   12.10
   0  12  -2   52.49   15.00
   0  12   2   48.60   13.80
   0 -12  -2   55.39    4.30
   0 -12   2   43.10    9.30
   0 -12   2   68.39   16.70
   0 -12  -2   51.29    4.90
   0 -12  -2   62.29   11.30
  -2  12   4   98.19   15.10
   2  12  -4  114.39   21.10
   2  12  -4  124.49   15.00
  -2  12   4   96.29   10.30
  -2  12   4   99.69   19.00
   2 -12  -4   64.99   11.80
  -2 -12   4  137.79   34.10
   2 -12  -4   86.59    9.60
   2 -12  -4  102.19   19.20
  -2 -12   4  111.09   14.20
   4  12  -6   18.50    6.70
  -4  12   6   16.70    9.70
  -4  12   6    2.90    5.60
   4  12  -6    8.00   10.50
   4 -12  -6    5.50    6.80
  -4 -12   6   12.30    6.70
   4 -12  -6    4.70   10.80
   4 -12  -6    8.10    5.40
   6  12  -8  189.88   11.70
  -6  12   8  137.19   18.50
   6  12  -8  220.78   16.60
   6  12  -8  166.18   29.00
   6  12  -8  203.68   10.90
   6 -12  -8  218.88   23.70
  -6 -12   8  217.88   16.70
   6 -12  -8  202.08   18.60
   8  12 -10   49.40    7.80
   8  12 -10   22.40   19.60
   8  12 -10   39.20    8.00
   8 -12 -10   18.70   10.30
  -8 -12  10   46.40    9.50
   8 -12 -10   34.60   10.70
  10  12 -12   -5.40   22.30
  10  12 -12   -5.10    7.80
  10  12 -12    5.70    8.10
  10 -12 -12   12.00    9.90
  10 -12 -12   23.30   11.50
  11  13  -9   68.09   11.90
  11  13  -9   47.30   24.30
  11 -13  -9   33.50   12.80
  11 -13  -9   23.80   16.10
   9  13  -7    4.20    5.90
   9  13  -7   16.60    6.40
   9  13  -7   -4.60    6.30
   9  13  -7   -2.20   16.90
  -9 -13   7    3.70    8.10
   9 -13  -7   20.10   11.60
   9 -13  -7   11.30   11.10
   7  13  -5   74.89   12.20
   7  13  -5   64.69    5.80
   7  13  -5   69.89    5.90
   7  13  -5   75.39   23.50
  -7 -13   5   64.09   11.20
   7 -13  -5   50.59   12.20
   7 -13  -5   71.69   14.10
   5  13  -3  119.19   26.30
   5  13  -3  129.49   15.30
  -5  13   3   57.19   12.00
   5 -13  -3  108.59   16.30
  -5 -13   3  132.39   15.80
   5 -13  -3   94.89   12.70
   3  13  -1  414.16   36.90
   3  13  -1  467.15   29.90
  -3  13   1  454.45   26.00
  -3  13   1  514.65   37.40
   3 -13  -1  548.85   32.80
   3 -13  -1  455.15   37.90
   3 -13  -1  483.55   25.40
  -3 -13   1  450.55   29.20
   3 -13  -1  489.05   25.10
  -3 -13   1  426.36   41.80
   1  13   1  151.48   23.00
  -1  13  -1  108.59   15.60
  -1  13  -1  114.19   18.70
   1  13   1  130.59   17.20
   1 -13   1  141.49   17.30
  -1 -13  -1  148.69   17.70
   1 -13   1  132.59   22.00
  -1 -13  -1  103.89   18.60
   1 -13   1  135.49    8.70
   1 -13   1  130.59    8.70
   1  13  -3   20.40   11.90
   1  13  -3   30.60   10.00
  -1  13   3   23.60    9.70
  -1  13   3   14.10   10.20
  -1  13   3   21.90    4.50
   1 -13  -3   15.60    8.10
   1 -13  -3   20.90   11.30
  -1 -13   3   31.40    9.70
  -1 -13   3   60.49   15.40
   1 -13  -3   40.10    5.50
  -3  13   5   46.00    8.30
   3  13  -5   33.30   14.80
   3  13  -5   26.50    8.80
  -3  13   5   39.00   13.80
  -3 -13   5   30.40    8.80
   3 -13  -5   39.90    7.40
   3 -13  -5   40.30   10.50
   3 -13  -5   67.09   25.10
   5  13  -7    5.00   12.80
  -5  13   7   13.80    7.90
   5  13  -7   14.00    7.30
   5 -13  -7   -0.40    7.30
  -5 -13   7   13.60    6.50
   5 -13  -7   16.40    7.30
   7  13  -9   31.60   18.70
   7  13  -9    9.50    4.30
   7  13  -9   12.70    3.60
   7  13  -9    7.70    6.50
  -7 -13   9   13.90    6.50
   7 -13  -9   18.70    9.40
   7 -13  -9   -1.80    7.60
   9  13 -11   12.10    6.10
   9  13 -11    4.20    5.90
   9  13 -11   28.20   21.30
   9  13 -11   15.00    8.20
  -9 -13  11   13.70    7.50
   9 -13 -11    9.30    9.70
   9 -13 -11   14.20   10.00
  10  14  -8   24.90    7.10
  10  14  -8   53.69   12.80
  10  14  -8   30.00   24.40
  10 -14  -8    1.70   13.20
  10 -14  -8   24.10   12.30
   8  14  -6   19.00    9.40
   8  14  -6   59.79   20.80
   8 -14  -6   35.00   12.00
  -8 -14   6   40.10   11.10
   8 -14  -6   40.60   12.80
   6  14  -4   50.69   11.60
  -6  14   4   34.50   11.50
   6  14  -4   66.99   18.20
  -6 -14   4   42.10    9.80
   6 -14  -4   51.19   13.20
   6 -14  -4   18.20    8.90
   4  14  -2  112.09   15.90
   4  14  -2  169.28   31.80
  -4  14   2  136.29   15.60
  -4 -14   2  139.89   17.10
   4 -14  -2  153.98   14.30
   2  14   0  707.93   50.19
  -2  14   0  645.64   46.70
   2  14   0  664.93   39.60
   2 -14   0  724.63   41.50
   2 -14   0  843.62   73.39
  -2 -14   0  726.33   40.60
   2 -14   0  705.33   32.50
   2 -14   0  686.23   32.10
   0  14   2 1339.57   73.69
   0  14   2 1323.47   69.89
   0  14  -2 1246.38   72.99
   0  14  -2 1324.07   64.79
   0 -14   2 1227.98   72.49
   0 -14   2 1339.07   64.59
   0 -14  -2 1335.97   64.79
   2  14  -4  137.39   23.40
   2  14  -4  147.99   17.30
  -2  14   4  148.69   23.80
  -2 -14   4  145.39   17.10
   2 -14  -4  101.29   15.60
   2 -14  -4  135.19   11.00
  -4  14   6   45.30   10.10
   4  14  -6   33.70   15.40
  -4 -14   6   49.10   10.80
   4 -14  -6   45.80   15.10
   4 -14  -6   33.50    7.90
   6  14  -8    6.70   13.40
   6  14  -8   -4.70    7.40
  -6  14   8   10.00   10.70
  -6 -14   8   15.60    7.20
   6 -14  -8   -4.10    6.90
   6 -14  -8    9.00    9.10
   8  14 -10   10.40    4.20
   8  14 -10   12.70   22.50
   8  14 -10   11.40    7.80
   8  14 -10   18.90    4.90
   8 -14 -10   15.70   10.90
  -8 -14  10   18.90    8.90
   8 -14 -10   12.30    9.80
  10  14 -12   17.50   26.70
  10 -14 -12   21.70   12.00
  10 -14 -12   18.80   13.60
   9  15  -7   30.70   12.70
   9 -15  -7   40.80   13.30
  -9 -15   7   20.90   12.00
   9 -15  -7   33.70   13.60
   7  15  -5   10.30    8.90
   7  15  -5   16.50   18.00
   7 -15  -5   11.80   11.80
  -7 -15   5   16.50    9.90
   7 -15  -5   20.30   10.70
   5  15  -3   -1.20    8.90
  -5  15   3   10.00    9.50
   5  15  -3   16.70   16.40
   5 -15  -3    7.50    7.40
  -5 -15   3    0.10    6.50
   5 -15  -3    4.10    8.50
  -3  15   1  152.18   25.10
   3  15  -1  153.58   26.30
  -3 -15   1  144.29   18.20
   3 -15  -1  170.18   13.90
   3 -15  -1  155.98   19.70
   3 -15  -1  168.08   13.00
  -1  15  -1  587.34   47.70
   1  15   1  747.93   53.19
   1 -15   1  792.22   31.30
   1 -15   1  641.74   42.00
  -1 -15  -1  802.42   44.00
   1 -15   1  755.32   31.10
  -1  15   3  507.75   41.10
   1  15  -3  514.15   42.20
   1 -15  -3  473.15   21.90
  -1 -15   3  559.74   33.80
   1 -15  -3  460.85   22.50
   1 -15  -3  427.56   31.90
   3  15  -5    3.30    8.40
  -3  15   5   11.50   13.70
   3  15  -5    4.80   13.50
  -3  15   5    4.60    6.60
   3 -15  -5   15.50    8.90
   3 -15  -5    0.00    6.10
  -3 -15   5    9.90    6.60
   5  15  -7   25.30    8.80
   5  15  -7   19.00   17.50
  -5  15   7   16.00   10.20
  -5 -15   7   24.90    8.80
   5 -15  -7   19.80    8.20
   5 -15  -7   22.70   10.50
   7  15  -9   28.00   19.50
   7  15  -9   -4.80    9.30
  -7 -15   9    4.60    8.20
   7 -15  -9   -7.30    8.40
   9  15 -11   32.60   29.30
   9 -15 -11   23.50   12.00
   9 -15 -11   24.30   12.60
   8  16  -6   29.90   21.00
   8  16  -6   49.80   12.20
   8 -16  -6   22.90   12.10
  -8 -16   6   38.70   13.10
   8 -16  -6   43.50   14.80
  -6  16   4   16.30   14.20
   6  16  -4   35.30   20.70
  -6 -16   4   48.60   11.70
   6 -16  -4   19.90   11.80
   6 -16  -4   26.10    9.00
   4  16  -2   41.70   19.60
  -4 -16   2   40.60   11.40
   4 -16  -2   37.20   13.60
   4 -16  -2   47.10    9.70
   4 -16  -2   55.79   10.00
  -2  16   0  -15.00   11.20
   2  16   0  -11.00    9.90
  -2 -16   0    3.40    6.30
   2 -16   0    9.80    9.00
   2 -16   0   14.30    5.00
   2 -16   0    2.80    4.00
   0  16  -2  490.55   43.30
   0  16   2  570.44   45.30
   0 -16   2  539.45   36.00
   0 -16  -2  478.25   34.20
  -2  16   4   44.00   17.10
   2  16  -4   39.00   18.00
   2 -16  -4   50.99    8.50
   2 -16  -4   55.59   13.80
   2 -16  -4   44.70    7.40
  -2 -16   4   62.39   13.80
   4  16  -6    3.70   14.60
  -4  16   6   14.00    8.60
   4 -16  -6   12.00    8.90
  -4 -16   6    9.50    7.10
   4 -16  -6   17.80    7.20
   6  16  -8   19.30   19.00
   6  16  -8   14.10   10.90
   6 -16  -8    7.60   10.80
   6 -16  -8   22.70   10.70
  -6 -16   8   36.40   11.30
   8  16 -10  -11.50   38.30
   8 -16 -10    8.80   11.70
   8 -16 -10   16.40   11.40
  -8 -16  10   -0.90    9.80
   7  17  -5   58.79   25.40
  -7 -17   5   19.70   10.80
   7 -17  -5   -3.70   10.60
   7 -17  -5    7.40   10.20
   5  17  -3   42.80   20.70
   5 -17  -3   27.40   12.30
   5 -17  -3   50.29   11.10
   5 -17  -3   42.20   10.50
  -3  17   1   52.09   18.30
   3  17  -1   55.69   19.80
   3 -17  -1   67.29    9.30
  -3 -17   1   33.90   12.20
   3 -17  -1   58.69    9.30
   3 -17  -1   33.80   12.80
  -1  17  -1  109.19   23.40
   1  17   1  170.58   30.60
   1 -17   1  150.98   20.60
  -1 -17  -1  163.98   21.80
   1  17  -3   14.90   16.20
  -1  17   3   -6.00   13.00
  -1 -17   3   21.70    9.40
   1 -17  -3   16.00   11.10
   3  17  -5   20.50   16.20
  -3 -17   5   11.50    9.00
   3 -17  -5   29.00    7.40
   3 -17  -5   13.10    9.90
  -5  17   7   91.89   16.50
   5  17  -7   95.79   28.40
   5 -17  -7   87.39   17.90
  -5 -17   7   64.89   12.80
   5 -17  -7   40.30   11.20
   7  17  -9    4.40   24.90
  -7 -17   9    1.00    9.60
   7 -17  -9   -0.60    9.80
   7 -17  -9   31.60   12.90
   6  18  -4   25.30   25.80
  -6 -18   4   -4.40    9.90
   6 -18  -4   12.80   10.90
   6 -18  -4   25.80   18.20
   4  18  -2   17.40   17.30
   4 -18  -2   15.90   11.10
   4 -18  -2   11.90    8.30
   4 -18  -2    3.40    7.10
  -4 -18   2    5.60    9.80
   2  18   0  -22.50   15.00
  -2  18   0  -24.80   12.20
   2 -18   0   -4.90    9.20
  -2 -18   0   -7.10    8.30
   2 -18   0    4.50    4.20
   2 -18   0    1.90    4.00
   0  18   2  -10.20   12.70
   0  18  -2    6.10   15.90
   0 -18  -2   -2.10    8.30
   0 -18   2    7.60    9.50
   2  18  -4  106.69   29.10
  -2  18   4  106.89   25.00
   2 -18  -4  102.49    9.60
   2 -18  -4  150.48   22.20
  -2 -18   4   91.49   16.30
   2 -18  -4  105.49   10.40
   4  18  -6   27.60   19.80
   4 -18  -6   22.20    9.90
  -4 -18   6   44.00   12.70
   4 -18  -6   22.80    8.30
   4 -18  -6   14.60   11.00
   6  18  -8   32.60   29.90
   6 -18  -8   29.30   12.10
  -6 -18   8   63.99   14.40
   5  19  -3   78.09   28.30
   5 -19  -3  120.99   20.40
   5 -19  -3  111.39   16.60
   5 -19  -3   81.79   13.90
  -5 -19   3   78.39   17.00
   3  19  -1  -21.90   16.30
   3 -19  -1    2.80    6.50
  -3 -19   1   17.10   11.00
   3 -19  -1   11.00    9.80
   3 -19  -1   36.90   13.80
  -1  19  -1  -24.70   13.40
   1  19   1    6.60   15.60
  -1 -19  -1   13.40   11.50
   1 -19   1  -14.60   10.80
   1  19  -3   46.90   19.10
  -1  19   3   33.20   20.00
  -1 -19   3   -2.30    9.50
   1 -19  -3   10.70   12.10
   3  19  -5   17.70   18.90
   3 -19  -5   27.50    7.90
   3 -19  -5   26.50    8.50
   3 -19  -5   21.90   12.90
  -3 -19   5   16.30   10.60
   5  19  -7  105.09   39.00
   5 -19  -7  114.59   16.60
   5 -19  -7  210.38   29.30
   5 -19  -7  181.88   26.80
  -5 -19   7  131.89   20.40
   4  20  -2   -5.60   19.40
   4 -20  -2  -11.30   11.10
  -4 -20   2   -0.50   11.80
   4 -20  -2   -0.80    8.90
   2  20   0   44.10   30.80
  -2  20   0   20.70   19.80
  -2 -20   0   23.00   14.20
   0  20  -2   26.10   18.40
   0  20   2    6.90   15.60
   0 -20  -2   -6.90   10.60
   0 -20   2   16.20   11.70
   2  20  -4   88.19   27.40
   2 -20  -4   93.99   22.30
  -2 -20   4   81.69   18.50
   4  20  -6  167.38   36.80
  -4 -20   6  169.38   24.30
   4 -20  -6  147.99   24.50
   4 -20  -6  190.58   18.60
   1  21   1   17.30   21.80
  -1  21  -1   38.50   23.60
   1 -21   1   -4.70   10.90
  -1 -21  -1   -6.20   12.80
   1  21  -3   45.30   23.90
  -1  21   3   58.69   26.40
   1 -21  -3   51.59   16.30
  14   0 -11   19.50   13.70
  12   0  -9    0.80    3.00
  12   0  -9    8.00    9.10
  12   0  -9   -2.70    3.90
  10   0  -7    0.10    5.40
  10   0  -7   -3.30    6.50
  10   0  -7    0.30    3.00
   8   0  -5   13.30    4.00
  -8   0   5    8.50    5.40
  -8   0   5    6.70    6.80
   8   0  -5    6.20    6.50
  -6   0   3    8.70    4.10
  -6   0   3    4.10    4.10
   6   0  -3    5.30    2.70
   6   0  -3    4.50    5.80
   4   0  -1    6.10    2.40
  -4   0   1    9.50    3.50
  -4   0   1    9.10    3.10
   4   0  -1    4.40    3.00
   2   0   1    1.50    1.60
  -2   0  -1   -0.80    1.40
   2   0   1   -0.20    1.30
  -2   0  -1   -0.10    1.40
   0   0  -3    1.40    1.30
   0   0   3    0.60    0.70
   0   0   3   -0.40    0.60
   0   0   3    1.70    1.40
  -2   0   5   -0.30    1.50
  -2   0   5    0.80    0.80
   2   0  -5    0.40    1.70
   2   0  -5    0.60    0.80
   4   0  -7    0.90    2.80
  -4   0   7   -1.70    2.40
  -4   0   7   -0.20    1.20
   4   0  -7    0.70    1.10
  -6   0   9    4.60    2.40
   6   0  -9   -0.80    4.20
   6   0  -9    2.30    1.50
  -6   0   9    7.00    4.90
  -8   0  11    8.80    6.90
   8   0 -11   -5.90    5.80
  -8   0  11   -0.40    3.50
   8   0 -11    1.40    1.60
  10   0 -13   17.00    9.90
  12   0 -15    1.90    8.30
  13   1 -10   24.30   11.30
  13  -1 -10   -9.90    4.90
  13  -1 -10    7.00   11.70
  13  -1 -10    3.10    3.90
  11   1  -8   13.60    9.20
 -11   1   8    6.60    8.90
  11   1  -8    3.90    3.60
  11   1  -8   10.00    3.20
  11  -1  -8    6.70    8.80
  11  -1  -8   10.10    4.40
  -9   1   6  570.54   35.70
   9   1  -6  545.75   28.40
   9   1  -6  568.54   34.60
   9   1  -6  561.54   26.00
  -9   1   6  590.44   32.30
   9  -1  -6  642.64   36.10
  -9  -1   6  519.25   34.00
   9  -1  -6  582.44   27.90
  -7   1   4  120.19   10.70
  -7   1   4  144.19   16.20
   7   1  -4  137.89   13.30
   7   1  -4  113.69   11.00
   7   1  -4  109.39    8.30
   7  -1  -4  126.49    9.60
  -7  -1   4   85.59   12.20
   7  -1  -4  123.69   14.60
  -5   1   2  900.21   39.10
  -5   1   2  880.91   41.30
   5   1  -2  905.01   40.90
   5   1  -2  825.02   37.10
  -5  -1   2  855.91   40.30
   5  -1  -2  857.41   41.00
  -5  -1   2  924.91   41.30
   5  -1  -2  871.61   38.00
  -3   1   0   35.40    4.40
   3   1   0   40.00    5.20
   3   1   0   40.70    5.30
   3   1   0   27.90    4.70
  -3   1   0   33.70    4.80
   3  -1   0   34.80    4.90
   3  -1   0   32.20    4.20
  -3  -1   0   31.40    4.60
   1   1   2    2.60    0.90
  -1   1  -2    2.30    1.40
   1   1   2    1.30    1.40
   1   1   2    1.90    1.30
  -1   1  -2    2.20    1.00
   1  -1   2    2.50    1.10
   1  -1   2    1.70    1.20
  -1  -1  -2    3.00    1.00
  -1  -1  -2    2.60    1.40
  -1   1   4    9.40    1.60
   1   1  -4    5.90    1.40
  -1   1   4    9.90    2.00
   1   1  -4    5.60    1.50
   1  -1  -4    5.10    1.60
   1  -1  -4    9.50    1.80
  -1  -1   4    7.50    1.40
  -1  -1   4    7.40    1.60
   3   1  -6   81.79    6.90
  -3   1   6   81.39    7.40
  -3   1   6   85.89    5.50
   3  -1  -6   80.99    5.50
   3  -1  -6   78.89    7.10
  -3  -1   6   76.69    6.90
   5   1  -8  358.06   20.50
  -5   1   8  344.67   17.00
  -5   1   8  335.67   21.10
   5  -1  -8  366.46   16.80
   5  -1  -8  352.96   20.70
  -5  -1   8  378.66   21.30
  -7   1  10    9.90    5.70
  -7   1  10   12.50    3.30
   7   1 -10    8.00    5.30
   7  -1 -10   12.70    6.30
  -7  -1  10    1.90    5.00
   7  -1 -10   11.30    3.20
  -9   1  12   14.70    5.40
   9   1 -12    4.20    7.60
   9  -1 -12   15.60    3.60
   9  -1 -12    9.00    6.70
  -9  -1  12    9.20    8.20
  11   1 -14   -0.30    8.70
  11  -1 -14   10.90    9.90
  13   1 -16    6.50    9.50
  13  -1 -16    9.50   11.60
  14   2 -11  277.27   45.00
  14  -2 -11  172.58   26.40
 -12   2   9  228.88   22.40
  12   2  -9  221.68   24.90
  12  -2  -9  185.58   14.30
  12  -2  -9  221.78   26.80
  10   2  -7    1.30    7.00
  10   2  -7    1.00    2.30
  10   2  -7    4.40    2.90
 -10   2   7   13.90    8.80
  10  -2  -7    1.70    7.40
  10  -2  -7    4.10    4.60
  -8   2   5   13.50    6.10
   8   2  -5   15.40    3.80
   8   2  -5    7.90    2.70
  -8   2   5   14.30   10.00
   8   2  -5    4.60    5.40
   8  -2  -5    5.50    5.90
  -8  -2   5   19.40    7.20
   8  -2  -5   15.10    4.70
   6   2  -3   38.60    4.80
  -6   2   3   30.40    5.70
  -6   2   3   41.60    8.30
   6   2  -3   28.50    4.90
   6   2  -3   23.80    6.40
   6  -2  -3   33.90    5.70
   6  -2  -3   35.50    7.80
  -6  -2   3   36.10    7.50
   4   2  -1 1133.09   48.00
   4   2  -1 1240.98   50.09
  -4   2   1 1098.39   49.10
  -4   2   1 1138.29   50.79
   4   2  -1 1153.18   49.70
   4  -2  -1 1139.29   48.90
  -4  -2   1 1188.48   49.90
   4  -2  -1 1184.98   50.99
   2   2   1   25.50    3.00
   2   2   1   24.50    3.30
   2   2   1   23.40    3.10
  -2   2  -1   21.10    3.50
  -2   2  -1   16.80    3.30
   2  -2   1   17.90    3.40
   2  -2   1   19.50    3.40
  -2  -2  -1   25.50    3.50
   0   2   3  948.61   40.10
   0   2  -3 1010.40   40.00
   0   2   3  953.40   41.20
   0   2  -3  939.81   39.10
   0   2  -3 1028.00   40.90
   0   2   3 1040.90   39.50
   0  -2  -3  962.30   41.30
   0  -2  -3  979.00   39.40
   0  -2   3  962.00   39.90
   0  -2  -3  995.40   40.20
   0  -2   3 1021.40   40.80
   0  -2   3  978.60   39.30
  -2   2   5  133.79    8.90
  -2   2   5  139.19    8.10
   2   2  -5  134.89    6.50
   2   2  -5  131.29    7.90
   2  -2  -5  147.69    9.00
   2  -2  -5  145.79    8.20
  -2  -2   5  140.59    6.30
  -2  -2   5  131.69    8.00
  -4   2   7 1107.39   52.09
   4   2  -7 1202.88   51.19
  -4   2   7 1181.28   49.40
  -4  -2   7 1213.68   51.49
   4  -2  -7 1226.98   49.50
   4  -2  -7 1213.48   52.19
  -6   2   9   48.10    8.60
   6   2  -9   39.20    7.50
  -6   2   9   28.20    4.90
  -6  -2   9   21.60    6.10
   6  -2  -9   26.50    7.30
   6  -2  -9   25.20    4.70
  -8   2  11    6.40    6.60
  -8   2  11   -2.90    3.80
   8   2 -11   -1.10    4.60
   8  -2 -11   -3.50    5.60
  -8  -2  11    5.40    5.70
   8  -2 -11   -2.30    2.70
  10   2 -13  706.13   41.60
 -10   2  13  758.02   36.10
  10  -2 -13  697.23   32.60
  10  -2 -13  711.33   42.60
  12   2 -15  106.89   18.20
  12  -2 -15   83.39    7.10
  12  -2 -15   88.79   18.00
 -13   3  10  231.18   27.70
  13   3 -10  208.58   25.50
  13  -3 -10  327.77   29.50
  13  -3 -10  256.57   18.60
 -11   3   8   -5.30    9.50
  11  -3  -8   15.60    8.60
  11  -3  -8   11.40    5.40
   9   3  -6   94.89    6.40
  -9   3   6  117.29   13.80
  -9   3   6   97.19   16.00
   9   3  -6   94.09   12.80
   9   3  -6   81.49    6.30
   9  -3  -6  106.09   11.40
  -9  -3   6   76.09   13.80
   9  -3  -6  128.99   16.70
  -7   3   4  106.09   13.50
   7   3  -4  127.59   12.90
  -7   3   4  123.79   11.70
   7   3  -4  144.99    9.00
   7   3  -4  135.19    8.70
   7  -3  -4  131.69   11.30
  -7  -3   4  117.79   13.30
   7  -3  -4  136.29   15.90
   5   3  -2  190.68   13.20
  -5   3   2  189.98   14.20
   5   3  -2  159.28   12.20
  -5   3   2  192.08   13.10
   5   3  -2  178.38   10.40
   5  -3  -2  184.78   12.40
   5  -3  -2  193.18   14.30
  -5  -3   2  195.38   13.20
  -3   3   0   15.50    4.20
  -3   3   0   17.40    3.90
   3   3   0   26.30    4.00
   3   3   0   20.30    3.30
   3  -3   0   23.70    4.20
  -3  -3   0   29.60    4.30
   3  -3   0   17.40    4.20
  -3  -3   0   27.90    4.20
   1   3   2   84.69    6.00
  -1   3  -2   79.29    6.60
   1   3   2   77.69    4.80
   1   3   2   78.39    7.80
  -1   3  -2   88.89    6.50
   1  -3   2   85.29    5.60
  -1  -3  -2   82.99    8.10
   1  -3   2   78.99    6.70
   1  -3   2   78.69    5.10
  -1  -3  -2   79.39    4.50
   1  -3   2   74.79    6.10
  -1  -3  -2   88.09    6.20
  -1   3   4    9.30    3.50
   1   3  -4   11.20    2.00
  -1   3   4    6.80    2.10
   1   3  -4    8.20    2.10
   1   3  -4   10.90    3.70
  -1   3   4   12.30    2.70
  -1  -3   4    8.90    1.90
   1  -3  -4    7.50    3.20
   1  -3  -4    8.40    2.20
  -1  -3   4   10.10    2.30
   1  -3  -4    8.60    2.40
  -3   3   6 4500.85  175.28
   3   3  -6 4514.35  171.88
  -3   3   6 4479.35  176.68
   3   3  -6 4672.93  174.78
   3  -3  -6 4303.77  174.98
  -3  -3   6 4489.05  171.78
   3  -3  -6 4281.57  175.98
  -3  -3   6 4604.24  174.98
  -5   3   8  891.81   40.50
  -5   3   8  985.90   44.80
   5   3  -8  914.71   41.90
   5  -3  -8  872.41   40.10
  -5  -3   8  890.51   42.20
   5  -3  -8 1006.00   46.70
  -7   3  10  758.32   35.60
   7   3 -10  748.43   38.60
  -7   3  10  804.82   41.80
  -7  -3  10  720.63   39.00
   7  -3 -10  764.62   35.20
   7  -3 -10  783.62   40.30
   9   3 -12  235.88   19.20
  -9   3  12  180.78   16.50
  -9  -3  12  205.18   22.20
   9  -3 -12  220.58   20.30
   9  -3 -12  179.48   13.40
  11   3 -14   87.59   15.70
  11  -3 -14   81.19   14.50
  11  -3 -14   59.69    8.30
  13   3 -16  136.69   20.50
  13  -3 -16  129.49    9.70
  14   4 -11   27.30   13.70
  14  -4 -11   13.40    7.60
  14  -4 -11   10.80   13.80
 -12   4   9  229.08   24.30
  12   4  -9  206.48   23.00
  12  -4  -9  193.08   16.80
  12  -4  -9  177.08   22.60
  10   4  -7  220.88   19.40
 -10   4   7  179.58   18.40
 -10  -4   7  165.18   20.60
  10  -4  -7  219.58   28.50
  10  -4  -7  153.18   14.50
  -8   4   5   96.89   15.40
  -8   4   5  114.09   13.10
   8   4  -5   82.99    6.20
   8   4  -5   72.79    6.30
   8   4  -5  111.19   14.10
   8  -4  -5   71.69   12.90
  -8  -4   5   99.59   13.60
   6   4  -3   13.70    4.80
   6   4  -3   15.20    3.10
  -6   4   3   19.90    5.70
  -6   4   3   19.60    7.30
   6   4  -3   12.80    4.50
   6  -4  -3   14.40    5.90
  -6  -4   3   15.20    5.00
   6  -4  -3   18.30    5.30
  -4   4   1   11.70    3.50
  -4   4   1   11.30    4.50
   4   4  -1   16.60    3.30
   4   4  -1   14.00    3.80
   4  -4  -1   14.10    4.60
   4  -4  -1   20.90    5.30
  -4  -4   1   16.80    3.70
  -4  -4   1   13.00    3.40
   2   4   1   98.59    6.00
  -2   4  -1  105.19    8.30
   2   4   1   92.29    5.60
   2   4   1  102.89    7.20
   2   4   1  131.69   14.50
  -2   4  -1   92.79    7.30
   2  -4   1  103.09    7.70
   2  -4   1   89.59    7.70
   2  -4   1   99.99    9.10
  -2  -4  -1   96.09    7.30
   0   4   3  393.26   21.50
   0   4   3  400.46   17.00
   0   4  -3  432.36   21.60
   0   4  -3  395.06   18.90
   0   4  -3  376.86   16.50
   0   4   3  381.06   19.00
   0  -4   3  375.76   16.60
   0  -4  -3  423.26   22.00
   0  -4  -3  404.56   17.20
   0  -4  -3  390.16   19.10
   0  -4   3  389.06   20.80
   0  -4   3  361.56   18.60
   2   4  -5   32.70    4.00
  -2   4   5   33.40    5.30
   2   4  -5   31.90    3.60
  -2   4   5   28.90    4.50
   2  -4  -5   35.30    7.30
  -2  -4   5   27.20    3.30
   2  -4  -5   28.30    4.80
   2  -4  -5   19.10    3.90
  -2  -4   5   27.00    3.60
  -4   4   7 1098.49   50.99
   4   4  -7 1135.69   48.50
   4   4  -7 1140.09   45.10
  -4   4   7 1168.58   49.70
   4  -4  -7 1150.88   50.69
  -4  -4   7 1150.48   48.90
   4  -4  -7 1170.88   49.40
  -4  -4   7 1108.19   45.10
  -6   4   9  154.58   13.40
   6   4  -9  153.38   12.80
  -6   4   9  139.29   14.00
  -6  -4   9  138.49   12.60
   6  -4  -9  135.79   13.20
   6  -4  -9  141.79   11.60
  -8   4  11   30.10    9.60
  -8   4  11   37.80    7.60
   8   4 -11   40.20    9.80
   8  -4 -11   39.90    7.40
   8  -4 -11   19.30    8.30
  -8  -4  11   33.70    8.80
  10   4 -13   19.10    8.30
 -10   4  13   12.90    7.60
  10  -4 -13   10.50    8.40
  12   4 -15   10.50    9.00
 -12   4  15   -1.90   10.40
  12  -4 -15   -3.40    9.00
  13   5 -10  454.25   34.30
 -13   5  10  477.25   40.20
  13  -5 -10  473.45   39.80
  13  -5 -10  423.36   27.90
 -11   5   8  105.19   17.50
  11   5  -8   87.69   14.20
  11  -5  -8   82.69   11.90
  11  -5  -8   66.09   14.90
   9   5  -6   67.59    4.80
   9   5  -6   72.99   12.50
  -9   5   6   57.79   11.40
   9   5  -6   68.89    4.60
   9  -5  -6   63.19   13.20
  -9  -5   6   66.89   11.90
   9  -5  -6   53.09    9.40
   7   5  -4   11.00    5.10
  -7   5   4    6.80    5.30
  -7   5   4    7.40    4.80
   7   5  -4   19.30    4.70
   7   5  -4    9.10    2.90
  -7  -5   4   11.80    5.70
   7  -5  -4   11.90    6.60
   7  -5  -4    9.20    4.80
  -5   5   2  106.69   10.20
   5   5  -2  111.19    9.30
   5   5  -2   98.29    7.60
  -5   5   2  112.09   10.60
  -5  -5   2  101.59    9.10
   5  -5  -2   88.99   10.30
  -5  -5   2   85.09    8.40
  -3   5   0  240.98   15.10
   3   5   0  233.88   12.00
   3   5   0  244.18   11.70
   3   5   0  241.28   13.40
  -3   5   0  236.88   14.50
   3   5   0  183.58   18.00
   3  -5   0  238.88   14.60
   3  -5   0  237.08   14.90
  -3  -5   0  239.98   13.60
   3  -5   0  230.38   16.80
  -1   5  -2  492.85   24.40
   1   5   2  509.15   28.10
   1   5   2  532.75   20.70
   1   5   2  518.75   24.10
  -1   5  -2  504.45   26.00
   1  -5   2  510.65   22.30
  -1  -5  -2  508.75   20.60
  -1  -5  -2  488.65   24.00
   1  -5   2  513.85   24.70
   1  -5   2  463.55   21.70
  -1  -5  -2  471.55   27.70
   1  -5   2  490.85   26.00
  -1   5   4 9411.36  364.06
   1   5  -4 9302.17  364.96
   1   5  -4 9537.55  370.76
  -1   5   4 9268.87  366.16
   1   5  -4 9241.18  361.96
  -1   5   4 9444.66  369.36
   1  -5  -4 9155.38  369.56
  -1  -5   4 9311.57  364.76
   1  -5  -4 9727.23  363.86
   1  -5  -4 9519.05  366.26
  -1  -5   4 9999.00  370.46
  -1  -5   4 9767.32  361.76
  -3   5   6  186.48   12.40
  -3   5   6  166.88   11.90
   3   5  -6  154.08    9.30
   3   5  -6  160.78   10.30
  -3  -5   6  149.88    9.40
   3  -5  -6  184.38   12.10
  -3  -5   6  171.78    9.60
   3  -5  -6  168.38   11.80
   3  -5  -6  141.59   14.30
   5   5  -8 1193.08   47.40
   5   5  -8 1252.47   52.09
  -5   5   8 1081.09   54.49
  -5   5   8 1138.49   52.89
   5  -5  -8 1272.67   53.29
   5  -5  -8 1266.57   54.99
  -5  -5   8 1132.49   51.89
  -5  -5   8 1214.48   47.90
   7   5 -10  107.19   12.90
  -7   5  10  108.89   11.10
   7  -5 -10  107.19   14.40
  -7  -5  10  109.59   13.00
   7  -5 -10  100.79   11.70
  -9   5  12   66.19   11.50
   9   5 -12   69.39   11.90
   9  -5 -12   80.69   13.80
  -9  -5  12   77.49   13.40
   9  -5 -12   85.69   11.00
 -11   5  14   22.80   10.80
  11   5 -14   17.90    9.20
  11  -5 -14   24.20    8.10
  11  -5 -14   28.30   11.60
  13   5 -16   12.10   10.80
  13  -5 -16   10.90    7.10
  13  -5 -16    0.20   11.80
 -12   6   9    5.40   13.40
  12   6  -9   15.80    8.50
  12  -6  -9   18.40    8.10
  12  -6  -9   19.40   12.30
 -10   6   7  366.06   27.00
  10   6  -7  337.67   24.40
  10  -6  -7  365.66   24.20
  10  -6  -7  324.77   27.20
 -10  -6   7  323.97   26.00
   8   6  -5  138.19    8.80
   8   6  -5  144.09   10.60
   8   6  -5  140.59   14.90
  -8   6   5  144.99   17.80
  -8   6   5  154.88   15.50
   8  -6  -5  160.48   14.70
   8  -6  -5  181.78   20.40
  -8  -6   5  139.29   15.20
  -6   6   3   55.69   10.80
  -6   6   3   56.79    9.80
   6   6  -3   47.80    6.00
   6   6  -3   38.20    7.20
   6  -6  -3   36.60    7.50
  -6  -6   3   54.49    8.10
  -6  -6   3   53.99    8.00
   6  -6  -3   36.80    8.50
   4   6  -1   50.49    6.40
   4   6  -1   54.69    6.10
   4   6  -1   44.70    5.20
  -4   6   1   42.40    7.10
  -4   6   1   35.60    7.10
   4  -6  -1   42.30    7.20
  -4  -6   1   54.99    7.00
   4  -6  -1   40.40    7.10
   4  -6  -1   52.79    9.70
   2   6   1 1677.33   64.69
  -2   6  -1 1644.74   72.29
   2   6   1 1616.34   75.19
   2   6   1 1668.83   68.59
   2   6   1 1612.04   64.29
  -2   6  -1 1724.83   68.29
  -2   6  -1 1636.44   72.59
  -2  -6  -1 1553.74   78.89
   2  -6   1 1663.33   72.69
  -2  -6  -1 1672.63   68.89
   2  -6   1 1637.24   69.79
   2  -6   1 1658.63   67.69
   0   6   3  774.62   32.30
   0   6  -3  777.42   39.40
   0   6   3  772.72   39.70
   0   6  -3  752.52   35.60
   0   6   3  788.82   36.00
   0  -6  -3  788.42   36.10
   0  -6   3  855.71   39.80
   0  -6   3  740.63   31.70
   0  -6   3  775.12   31.90
   0  -6  -3  806.52   40.30
   0  -6   3  790.62   35.70
   0  -6  -3  807.72   32.50
  -2   6   5    5.10    3.00
   2   6  -5    6.40    1.80
  -2   6   5    3.70    4.80
   2   6  -5   -0.50    4.80
  -2   6   5    2.40    3.50
   2   6  -5    7.40    3.20
  -2  -6   5    5.40    1.50
   2  -6  -5    5.90    2.90
  -2  -6   5    3.50    2.20
   2  -6  -5    1.90    4.00
   2  -6  -5    7.50    3.50
   4   6  -7  201.28   11.60
   4   6  -7  175.58   10.40
  -4   6   7  215.68   14.40
  -4   6   7  188.68   14.30
   4  -6  -7  213.98   14.30
  -4  -6   7  155.78   10.40
   4  -6  -7  187.78   17.80
  -4  -6   7  171.58   11.30
   4  -6  -7  159.38   13.30
   6   6  -9   19.10    2.60
   6   6  -9   22.70    6.00
  -6   6   9   19.30    6.30
  -6   6   9   12.30    6.30
   6  -6  -9   13.50    5.80
   6  -6  -9   22.60    6.70
  -6  -6   9   22.80    6.10
  -8   6  11   49.90    9.10
  -8   6  11   23.90   14.40
   8   6 -11   35.10    8.50
   8  -6 -11   24.80    8.00
  -8  -6  11   41.40    9.30
   8  -6 -11   49.90    9.30
  10   6 -13   72.89   12.90
 -10   6  13   69.79   12.70
  10  -6 -13   59.29   15.80
  10  -6 -13   51.19    9.50
  12   6 -15  140.09   19.60
 -12   6  15  127.39   19.90
  12  -6 -15  152.38   23.10
  12  -6 -15  143.89   16.00
  13   7 -10   13.40   10.50
  13  -7 -10   23.60   13.00
  13  -7 -10   16.20    9.80
 -11   7   8   -3.80   11.50
  11   7  -8   58.29   12.70
  11  -7  -8   13.10    7.20
  11  -7  -8   39.50   12.50
  -9   7   6  121.19   15.90
   9   7  -6  135.59    8.00
   9   7  -6  124.59    8.90
   9   7  -6  132.39   15.60
   9  -7  -6  111.09   16.40
   9  -7  -6  120.09   14.70
  -9  -7   6  119.89   15.60
   7   7  -4  379.96   20.20
  -7   7   4  420.66   26.80
   7   7  -4  422.96   23.60
   7  -7  -4  437.46   27.90
  -7  -7   4  413.16   24.10
   7  -7  -4  430.26   26.10
   5   7  -2   47.40    5.90
   5   7  -2   46.20    6.50
  -5   7   2   44.40    8.70
   5   7  -2   40.60    6.10
  -5   7   2   60.49    9.80
   5   7  -2   36.00   12.00
  -5  -7   2   47.00    7.20
   5  -7  -2   39.10   10.10
   5  -7  -2   59.09   10.00
   5  -7  -2   50.89    9.20
  -3   7   0  985.90   44.40
   3   7   0  913.61   37.60
   3   7   0  870.31   53.89
  -3   7   0  956.10   42.50
   3   7   0  978.00   37.70
   3   7   0  915.01   41.60
  -3  -7   0  921.71   42.10
   3  -7   0 1005.30   47.90
   3  -7   0  860.01   41.60
   3  -7   0  869.41   43.40
   1   7   2  834.02   40.40
   1   7   2  815.12   43.40
  -1   7  -2  803.42   38.40
   1   7   2  780.92   32.40
  -1   7  -2  815.92   41.60
   1  -7   2  806.02   44.90
  -1  -7  -2  776.92   37.80
  -1  -7  -2  772.22   43.00
  -1  -7  -2  853.51   32.50
   1  -7   2  861.21   34.90
   1  -7   2  859.11   38.80
   1  -7   2  820.82   34.40
  -1   7   4   31.60    6.20
   1   7  -4   44.30    9.20
  -1   7   4   54.69   10.20
  -1   7   4   54.19    5.90
   1   7  -4   54.69    7.20
  -1  -7   4   35.90    8.20
  -1  -7   4   47.80    2.70
   1  -7  -4   41.70    5.00
   1  -7  -4   36.80    8.50
  -1  -7   4   35.10    6.10
   1  -7  -4   42.80    7.00
  -1  -7   4   39.10    2.80
  -3   7   6  118.79   11.20
   3   7  -6  103.39   15.60
   3   7  -6  119.69    9.50
   3   7  -6  113.79    7.70
  -3   7   6  146.29   11.30
   3  -7  -6  107.09   14.40
   3  -7  -6  120.99   10.50
  -3  -7   6  130.39    7.70
   3  -7  -6  120.49   11.50
  -3  -7   6  119.09    9.30
  -5   7   8   97.59   12.30
   5   7  -8  111.79    8.00
   5   7  -8  115.19    9.30
  -5   7   8   89.09   11.40
   5  -7  -8  111.19   13.00
  -5  -7   8  101.19    8.10
   5  -7  -8   72.09   14.20
   5  -7  -8   62.29   10.50
  -5  -7   8  108.89    9.30
   7   7 -10    9.10    5.20
  -7   7  10    8.90    6.30
  -7   7  10   -5.40    7.10
   7  -7 -10   -9.00    6.10
  -7  -7  10   10.00    5.40
   7  -7 -10    3.80    5.20
   9   7 -12   45.40    9.90
  -9   7  12   59.09   11.90
   9  -7 -12   67.39   11.10
   9  -7 -12   46.10   12.50
 -11   7  14   22.50   12.00
  11  -7 -14   39.10   12.90
  11  -7 -14   16.20    7.60
  13   7 -16   46.20   15.00
  13  -7 -16   14.90   13.80
  13  -7 -16   52.59   11.60
  12   8  -9   37.20   12.00
  12  -8  -9   69.99   18.80
  12  -8  -9   54.59   12.10
 -10   8   7   96.59   16.40
  10   8  -7  112.89   14.80
  10  -8  -7   98.99   15.10
 -10  -8   7  108.39   16.00
  10  -8  -7   79.39   14.00
  -8   8   5  545.45   38.80
   8   8  -5  537.15   30.40
   8   8  -5  509.05   45.20
   8   8  -5  490.35   24.10
   8   8  -5  510.55   28.20
   8  -8  -5  440.06   42.90
   8  -8  -5  595.04   34.10
   8  -8  -5  450.35   30.00
  -8  -8   5  514.75   29.20
   6   8  -3  222.38   14.20
  -6   8   3  237.48   18.70
   6   8  -3  294.57   35.00
  -6   8   3  210.98   18.80
   6   8  -3  237.08   14.50
   6   8  -3  257.17   15.10
  -6  -8   3  224.88   16.00
   6  -8  -3  175.08   23.00
   6  -8  -3  202.08   17.60
   6  -8  -3  222.28   18.60
   4   8  -1   30.80   10.40
   4   8  -1   21.30    4.90
   4   8  -1   15.90    3.20
  -4   8   1   17.40    6.10
   4   8  -1   21.20    3.70
  -4   8   1   12.20    5.00
   4  -8  -1   14.10    6.80
  -4  -8   1   16.00    4.80
   4  -8  -1   13.70    5.80
   4  -8  -1    6.80    4.50
  -2   8  -1 1324.67   62.19
   2   8   1 1306.67   57.19
  -2   8  -1 1337.17   58.89
   2   8   1 1240.78   64.69
  -2   8  -1 1330.67   55.39
   2  -8   1 1325.87   54.89
  -2  -8  -1 1264.07   57.29
   2  -8   1 1349.86   59.19
  -2  -8  -1 1196.18   64.19
   2  -8   1 1306.77   62.29
   0   8  -3    9.50    7.20
   0   8  -3   14.30    5.00
   0   8   3    6.60    4.30
   0   8   3    9.30    5.50
   0   8   3    9.50    2.40
   0  -8   3    5.60    4.20
   0  -8   3    9.10    1.90
   0  -8   3    9.70    2.00
   0  -8  -3   12.10    2.80
   0  -8  -3   10.50    4.70
   0  -8  -3   10.70    5.60
   0  -8   3   11.80    6.20
  -2   8   5  363.16   19.70
  -2   8   5  331.87   21.60
  -2   8   5  391.66   26.30
   2   8  -5  399.76   32.00
   2  -8  -5  362.96   25.90
  -2  -8   5  370.16   20.30
   2  -8  -5  365.76   22.00
   2  -8  -5  341.87   18.80
   4   8  -7   52.89    5.90
   4   8  -7   38.00   11.50
  -4   8   7   41.50    8.10
   4   8  -7   43.80    6.40
  -4   8   7   41.10    7.80
  -4  -8   7   43.20    6.70
   4  -8  -7   43.30    7.60
   4  -8  -7   39.80   10.50
   4  -8  -7   33.40    7.80
  -4  -8   7   41.60    5.30
   6   8  -9  401.16   38.50
   6   8  -9  480.15   24.60
   6   8  -9  492.25   22.50
  -6   8   9  473.15   29.70
  -6   8   9  434.26   28.10
   6  -8  -9  446.96   34.60
   6  -8  -9  476.05   28.30
  -6  -8   9  453.15   22.80
   6  -8  -9  490.35   28.80
  -6  -8   9  487.45   25.20
  -8   8  11   24.00    9.30
   8   8 -11   38.70    8.40
   8  -8 -11   18.60    9.50
  -8  -8  11   61.29   10.50
   8  -8 -11   43.70   10.00
  10   8 -13   -1.20    6.40
 -10   8  13    1.60   10.00
  10  -8 -13   11.00   11.00
 -10  -8  13    4.10   10.30
  10  -8 -13   -6.40    5.80
  12   8 -15   10.20    9.90
  12  -8 -15    6.70    8.10
  11   9  -8   20.80    9.10
  11   9  -8   38.60   23.10
  11  -9  -8   13.70    8.40
  11  -9  -8   30.50   11.60
   9   9  -6   35.50    8.60
  -9   9   6   53.59   14.20
   9   9  -6   35.60   17.30
   9   9  -6   45.60    5.70
   9   9  -6   38.10    8.90
   9   9  -6   13.50    7.10
   9  -9  -6   39.20   10.00
   9  -9  -6   40.90   11.80
   7   9  -4   79.09   20.80
   7   9  -4  114.79   10.40
   7   9  -4   93.99    9.30
  -7   9   4  100.89   14.90
  -7   9   4   59.59   12.40
   7  -9  -4   64.39   12.00
  -7  -9   4  105.99   12.80
   7  -9  -4   79.59   13.40
   7  -9  -4   85.49   18.10
   5   9  -2  274.47   28.70
   5   9  -2  321.17   15.60
   5   9  -2  290.17   15.10
  -5   9   2  284.87   21.60
  -5   9   2  284.67   20.60
   5   9  -2  298.57   18.30
   5  -9  -2  274.17   25.50
   5  -9  -2  302.27   20.30
   5  -9  -2  309.97   21.80
  -5  -9   2  298.77   19.00
   3   9   0 1828.42   90.89
  -3   9   0 1874.51   82.79
  -3   9   0 1802.22   82.79
   3   9   0 1936.01   80.79
  -3  -9   0 1899.41   81.09
   3  -9   0 1883.01   79.29
   3  -9   0 1984.10   88.39
   3  -9   0 1981.00   83.49
  -1   9  -2  343.67   21.90
   1   9   2  364.76   21.60
   1   9   2  347.67   14.20
   1   9   2  331.67   26.30
  -1  -9  -2  329.47   26.30
  -1  -9  -2  352.16   21.60
   1  -9   2  355.46   17.10
   1  -9   2  336.87   16.70
   1  -9   2  363.46   22.00
   1  -9   2  374.66   25.70
  -1   9   4    6.70    2.90
  -1   9   4    8.40    4.60
  -1   9   4    5.20    5.10
   1   9  -4    6.50    4.40
   1   9  -4    9.30    6.90
  -1  -9   4    6.70    4.20
  -1  -9   4   14.20    7.40
   1  -9  -4    8.30    4.80
   1  -9  -4   10.60    3.50
   1  -9  -4   17.00    8.70
  -3   9   6    1.40    4.30
   3   9  -6    1.40    6.90
   3   9  -6    8.20    1.90
  -3   9   6    6.70    3.80
   3   9  -6   -1.20    3.10
   3  -9  -6    4.70    4.90
  -3  -9   6   12.60    4.50
  -3  -9   6    9.10    1.70
   3  -9  -6    1.80    6.80
   3  -9  -6    2.00    3.60
   5   9  -8   17.30    4.60
   5   9  -8    4.40    4.20
  -5   9   8   19.80    7.40
   5   9  -8   12.60    9.70
  -5   9   8   16.20    7.50
  -5  -9   8   12.10    4.40
   5  -9  -8   15.10    7.60
  -5  -9   8   16.10    4.00
   5  -9  -8    6.90    5.90
  -7   9  10   13.00    9.40
   7   9 -10    2.80   12.00
  -7   9  10   17.10    7.70
   7   9 -10   24.10    5.90
   7   9 -10   13.40    3.80
   7  -9 -10    7.20    7.30
  -7  -9  10   17.20    5.10
  -7  -9  10   19.90    7.10
   7  -9 -10   22.70    7.10
  -9   9  12    4.20    9.40
   9   9 -12   13.60    6.80
   9  -9 -12    9.80   10.30
   9  -9 -12    3.20    7.00
  -9  -9  12    0.70    7.80
  11   9 -14  232.48   22.30
  11  -9 -14  213.48   21.60
  11  -9 -14  259.57   29.00
  12  10  -9   37.90   26.70
  12 -10  -9   42.40   12.20
  10  10  -7   55.69   22.80
  10  10  -7   44.90    5.40
  10  10  -7   64.09   11.30
  10  10  -7   42.10    6.00
  10  10  -7   53.79   10.70
  10 -10  -7   47.40   13.50
   8  10  -5   52.09   17.60
   8  10  -5   96.59   10.20
   8  10  -5   96.29   10.60
   8 -10  -5   76.39   13.60
   8 -10  -5   78.29   14.00
  -8 -10   5   76.59   11.80
  -6  10   3 1521.85   67.69
   6  10  -3 1423.96   61.79
  -6  10   3 1323.67   67.09
   6  10  -3 1428.26   58.59
   6  10  -3 1435.06   58.69
   6  10  -3 1402.66   80.49
  -6 -10   3 1380.66   62.99
   6 -10  -3 1325.57   66.39
   6 -10  -3 1356.26   73.69
   6 -10  -3 1464.25   65.99
  -4  10   1   12.50    5.80
  -4  10   1   10.50    7.00
   4  10  -1   10.00    9.80
   4  10  -1   13.20    5.20
  -4 -10   1    9.70    5.60
   4 -10  -1    2.60    5.30
   4 -10  -1   21.70    9.70
  -2  10  -1   44.70   11.90
   2  10   1   31.50   10.30
  -2  10  -1   41.60    8.80
   2  10   1   33.40    7.10
   2 -10   1   30.00    5.10
   2 -10   1   15.50    9.70
   2 -10   1   31.70    5.40
  -2 -10  -1   29.50   10.90
  -2 -10  -1   35.20    8.10
   2 -10   1   32.20    7.40
   0  10   3    0.30    1.90
   0  10  -3    4.30    4.70
   0  10   3    5.50    6.40
   0  10  -3   -0.70    5.90
   0  10   3   -0.10    4.00
   0 -10   3    0.00    6.50
   0 -10   3   -1.20    1.50
   0 -10   3    1.40    4.40
   0 -10  -3    7.20    7.10
   0 -10   3    1.10    1.60
   0 -10  -3    0.00    2.00
   0 -10  -3    4.30    4.70
   2  10  -5  104.99   12.50
   2  10  -5   88.99   17.40
  -2  10   5   55.99   10.00
  -2  10   5   84.49   15.50
  -2  10   5   75.79    9.10
   2 -10  -5   71.59   11.80
   2 -10  -5   91.39    8.80
  -2 -10   5   95.39   16.00
   2 -10  -5  107.19   17.70
  -2 -10   5   95.69   11.50
   4  10  -7    2.40    3.60
   4  10  -7   19.60   11.50
  -4  10   7    7.70    5.30
  -4  10   7   -1.80    5.90
   4  10  -7   10.20    2.90
   4 -10  -7    3.20   13.30
  -4 -10   7    7.20    4.50
  -4 -10   7    3.80    2.40
   4 -10  -7    5.50    5.00
   4 -10  -7    8.30    6.70
   6  10  -9   34.40   16.20
  -6  10   9   65.29   12.40
   6  10  -9   29.50    6.00
   6  10  -9   21.70    5.60
  -6  10   9   40.80   10.50
   6 -10  -9   39.40    9.30
  -6 -10   9   33.90    6.80
  -6 -10   9   28.90    6.00
   6 -10  -9   31.70    9.00
   8  10 -11  240.58   13.10
   8  10 -11  251.67   39.00
   8  10 -11  212.38   16.80
   8 -10 -11  256.77   21.30
   8 -10 -11  231.98   24.80
  -8 -10  11  227.18   18.70
  10  10 -13    8.80   23.50
  10  10 -13   29.10    9.50
  10 -10 -13   31.10   11.70
  10 -10 -13   36.00   11.50
 -10 -10  13    4.60   11.50
  12  10 -15  -27.70   25.80
  12  10 -15    3.00   10.60
  12 -10 -15    1.80   12.70
  12 -10 -15    0.20   10.40
  11  11  -8   67.69   12.10
  11  11  -8   35.90   10.60
  11  11  -8   53.59   25.70
  11 -11  -8   34.50   13.20
  11 -11  -8   37.70   13.80
   9  11  -6    8.80    9.90
   9  11  -6   -3.20   14.00
   9  11  -6    4.20    5.80
   9  11  -6   18.50    6.90
   9 -11  -6   11.00    8.40
   9 -11  -6   13.50    8.50
   7  11  -4  739.13   62.39
   7  11  -4  828.32   36.90
   7  11  -4  832.52   36.90
   7  11  -4  818.62   39.70
  -7  11   4  776.82   45.20
   7 -11  -4  852.01   44.70
   7 -11  -4  832.02   45.90
   5  11  -2  157.78    8.40
  -5  11   2  172.78   19.30
   5  11  -2  153.48   14.10
  -5  11   2  155.18   17.00
   5  11  -2  171.88    8.10
   5  11  -2  143.89   24.40
   5 -11  -2  170.68   17.50
  -5 -11   2  169.48   15.30
   5 -11  -2  220.18   16.60
   5 -11  -2  164.58   22.80
  -3  11   0   55.49    8.40
   3  11   0   39.30    8.10
  -3  11   0   25.70   10.80
   3  11   0   40.60   13.40
  -3  11   0   46.00   12.20
  -3 -11   0   25.90   14.20
   3 -11   0   58.69    8.40
   3 -11   0   74.09   11.70
   3 -11   0   60.59   14.90
  -3 -11   0   31.60    7.80
  -1  11  -2  265.37   24.40
   1  11   2  265.27   20.10
   1  11   2  313.97   27.60
  -1  11  -2  255.47   20.10
   1 -11   2  265.17   20.00
  -1 -11  -2  293.77   20.70
   1 -11   2  302.17   14.50
   1 -11   2  277.97   14.20
  -1 -11  -2  278.47   26.80
   1 -11   2  236.18   24.30
   1  11  -4   48.50    8.80
  -1  11   4   35.60    8.80
  -1  11   4   49.99    6.40
   1  11  -4   51.89   15.20
  -1  11   4   49.50   12.60
   1 -11  -4   35.50    9.20
   1 -11  -4   56.19   12.40
  -1 -11   4   59.09    9.90
   1 -11  -4   65.49    6.90
  -1 -11   4   52.99   12.20
  -3  11   6  204.18   20.70
   3  11  -6  230.48   28.20
   3  11  -6  194.38   15.20
  -3  11   6  179.78   14.80
   3 -11  -6  181.78   14.00
  -3 -11   6  199.78   15.70
   3 -11  -6  192.98   17.60
   3 -11  -6  173.38   27.00
  -5  11   8  316.07   22.90
   5  11  -8  292.07   15.90
  -5  11   8  304.17   24.30
   5  11  -8  339.97   20.40
   5  11  -8  312.07   33.40
   5 -11  -8  310.17   21.50
   5 -11  -8  345.17   31.60
   5 -11  -8  329.27   24.70
  -5 -11   8  357.86   21.00
   7  11 -10   86.79   14.80
   7  11 -10  114.69   11.00
   7  11 -10   51.29   21.50
  -7 -11  10  102.19   11.80
   7 -11 -10  117.09   16.50
   7 -11 -10  128.29   17.40
   9  11 -12   -4.90   17.60
   9  11 -12   12.90    7.20
   9 -11 -12   -1.10    7.30
   9 -11 -12    2.00    9.60
  -9 -11  12    8.90    8.20
  11  11 -14  109.49   16.20
  11 -11 -14  136.79   22.60
  11 -11 -14  129.69   18.80
  10  12  -7   56.29   11.00
  10  12  -7   48.10    9.20
  10  12  -7   41.60    7.10
  10  12  -7   43.60   10.30
  10  12  -7   53.99   23.70
  10 -12  -7   75.79   16.60
  10 -12  -7   29.80   11.60
   8  12  -5  507.75   48.40
   8  12  -5  444.16   30.30
   8  12  -5  497.05   25.00
   8  12  -5  448.06   26.30
  -8 -12   5  475.05   29.70
   8 -12  -5  506.55   35.30
   8 -12  -5  457.95   32.60
   6  12  -3   73.09    5.90
   6  12  -3   72.89   19.40
   6  12  -3   77.89    5.60
  -6  12   3   79.79   13.70
   6  12  -3   84.49   11.90
   6 -12  -3   86.39   13.30
  -6 -12   3   59.39   11.10
   6 -12  -3   63.89   12.60
   4  12  -1  222.38   28.60
   4  12  -1  231.18   18.70
  -4  12   1  224.88   17.90
  -4  12   1  267.97   22.40
   4 -12  -1  237.78   17.30
  -4 -12   1  215.78   18.60
   4 -12  -1  247.98   20.80
   4 -12  -1  253.97   26.50
   2  12   1  223.08   28.40
   2  12   1  275.97   20.50
  -2  12  -1  236.18   25.10
  -2  12  -1  310.37   22.40
  -2 -12  -1  269.37   26.40
   2 -12   1  280.87   30.80
  -2 -12  -1  214.98   19.20
   2 -12   1  280.17   21.60
   2 -12   1  271.67   15.40
   2 -12   1  270.27   15.10
   0  12  -3   10.70    6.80
   0  12   3   20.00   10.60
   0  12   3   19.00    8.90
   0  12   3    6.80    3.10
   0  12  -3   16.70   10.30
   0 -12  -3   14.70   15.90
   0 -12   3   21.50    6.50
   0 -12  -3   10.10    6.40
   0 -12   3   13.50    2.00
   0 -12  -3   11.20    3.30
   0 -12   3   12.50    9.80
   2  12  -5  174.48   16.10
  -2  12   5  180.88   24.30
  -2  12   5  203.58   18.80
   2  12  -5  186.18   26.80
   2 -12  -5  206.88   28.00
  -2 -12   5  165.18   15.20
   2 -12  -5  172.58   12.60
   2 -12  -5  188.98   17.50
   4  12  -7  178.08   15.60
  -4  12   7  181.18   16.10
   4  12  -7  164.48   25.50
  -4  12   7  129.39   18.00
   4 -12  -7  158.28   19.00
   4 -12  -7  157.48   14.80
   4 -12  -7  193.38   26.20
  -4 -12   7  164.08   15.60
   6  12  -9  214.48   33.20
  -6  12   9  270.87   23.80
   6  12  -9  249.68   13.40
   6  12  -9  255.07   14.50
   6  12  -9  267.07   18.70
  -6 -12   9  297.17   22.50
   6 -12  -9  252.77   22.80
   6 -12  -9  282.07   21.50
   8  12 -11   43.70   22.50
   8  12 -11   65.09    8.50
   8  12 -11   47.70    8.80
   8 -12 -11   32.60   11.30
  -8 -12  11   69.39    9.40
  -8 -12  11   59.99    9.50
   8 -12 -11   51.89   12.30
  10  12 -13   33.80    9.50
  10  12 -13   11.80   22.40
  10 -12 -13   61.09   15.80
  10 -12 -13   16.60    9.50
 -10 -12  13   21.10   12.60
  11  13  -8   10.30    8.70
  11  13  -8  -27.40   19.10
  11 -13  -8    0.90   13.10
  11 -13  -8   19.00   11.60
   9  13  -6  337.77   21.70
   9  13  -6  310.07   19.90
   9  13  -6  342.57   45.70
   9  13  -6  375.96   20.80
   9 -13  -6  289.97   27.90
   9 -13  -6  319.57   28.50
  -9 -13   6  351.36   26.00
   7  13  -4   45.10    4.80
   7  13  -4   38.70    4.50
   7  13  -4   39.70   18.70
   7  13  -4   54.99   10.40
  -7 -13   4   29.80    9.00
   7 -13  -4   40.20   11.10
   7 -13  -4   40.50   13.10
   5  13  -2   28.00   14.60
   5  13  -2   32.70    8.20
  -5  13   2   10.20    7.40
  -5 -13   2   14.80    7.60
   5 -13  -2   33.60    8.60
   5 -13  -2   18.60    8.70
   3  13   0  114.69   22.70
  -3  13   0  144.09   21.50
   3 -13   0  123.49   17.00
   3 -13   0  146.89   12.10
  -3 -13   0  130.19   15.90
  -3 -13   0   96.89   27.10
   3 -13   0  149.79   11.70
   3 -13   0  116.19   19.20
   1  13   2  609.94   35.70
  -1  13  -2  558.24   40.60
  -1  13  -2  596.74   36.00
   1  13   2  606.44   43.30
  -1 -13  -2  627.74   35.70
   1 -13   2  633.14   26.90
   1 -13   2  576.64   35.40
   1 -13   2  593.34   26.50
  -1 -13  -2  646.54   44.70
   1 -13   2  531.35   40.80
  -1  13   4  105.69    9.30
  -1  13   4  102.99   18.30
   1  13  -4  115.19   17.90
   1  13  -4  100.09   18.20
  -1  13   4   97.59   14.80
   1 -13  -4  110.79   14.30
   1 -13  -4  112.19    9.20
  -1 -13   4   91.99   13.30
   1 -13  -4  134.69   23.60
  -1 -13   4  104.89   18.80
   3  13  -6  814.12   43.00
   3  13  -6  823.02   54.89
  -3  13   6  833.92   40.50
   3 -13  -6  822.22   45.50
  -3 -13   6  772.52   42.00
   5  13  -8    5.10   12.60
  -5  13   8    0.00    6.50
   5  13  -8   -6.30    6.30
   5 -13  -8    0.20    7.20
   5 -13  -8   -2.40    4.90
  -5 -13   8    0.40    6.00
   7  13 -10  154.98   15.20
   7  13 -10  182.58   11.00
   7  13 -10  167.78   31.40
   7  13 -10  177.08   12.00
  -7 -13  10  195.98   16.90
   7 -13 -10  155.98   20.00
   7 -13 -10  210.88   20.30
   9  13 -12   80.99    9.20
   9  13 -12   92.19   26.50
   9  13 -12  101.49   10.90
   9 -13 -12  105.19   18.40
   9 -13 -12   87.89   17.00
  10  14  -7  142.59   33.00
  10  14  -7  144.79   13.70
  10 -14  -7  125.29   21.10
  10 -14  -7  165.68   23.10
   8  14  -5   60.49   20.70
   8  14  -5   60.99   11.50
  -8 -14   5   75.29   13.20
   8 -14  -5   58.99   14.30
   8 -14  -5   76.39   14.50
   6  14  -3   -4.80   14.40
  -6  14   3   -5.70    8.80
   6 -14  -3   -4.00    7.90
  -6 -14   3   -3.50    6.10
   6 -14  -3   -0.90    7.60
   4  14  -1   -1.20   17.30
   4  14  -1    6.60    7.80
  -4 -14   1   14.20    7.80
   4 -14  -1    0.30    5.80
   4 -14  -1    5.20    6.20
   2  14   1   81.79   18.90
   2  14   1   53.69   12.40
  -2  14  -1   62.99   17.80
   2 -14   1   93.19   14.20
   2 -14   1   79.69    8.70
   2 -14   1   81.89   19.40
   2 -14   1   88.09    9.00
  -2 -14  -1   93.09   15.00
   0  14  -3   60.69   11.80
   0  14  -3   35.20   14.60
   0  14   3   21.20   11.60
   0 -14   3   66.29   17.30
   0 -14  -3   26.00    8.50
   0 -14   3   25.80    9.80
  -2  14   5  640.94   33.80
   2  14  -5  745.83   50.29
  -2  14   5  697.73   47.50
   2  14  -5  662.33   38.20
   2 -14  -5  639.94   32.10
  -2 -14   5  666.33   38.60
   2 -14  -5  734.23   41.30
   4  14  -7   68.99   17.60
  -4  14   7   46.00   10.30
   4 -14  -7   55.99    9.80
  -4 -14   7   63.09   12.30
   4 -14  -7   57.39   12.90
   6  14  -9   48.50   21.20
   6  14  -9   72.39   12.30
  -6  14   9   93.19   16.80
   6 -14  -9   68.59   12.70
  -6 -14   9   67.29   11.90
   6 -14  -9   72.09   15.00
   8  14 -11   19.60    5.50
   8  14 -11   25.90    8.10
   8  14 -11   23.00    4.70
   8  14 -11  -13.80   18.40
   8 -14 -11   13.80   11.00
  -8 -14  11   18.70   10.50
   8 -14 -11   33.50   10.60
  10  14 -13    3.50   24.30
  10  14 -13   20.00    8.80
  10 -14 -13    5.60   11.20
  10 -14 -13    5.60   10.70
   9  15  -6   49.40   44.30
   9  15  -6   49.80   11.50
   9 -15  -6   34.20   14.40
   9 -15  -6   18.60   13.30
  -9 -15   6   40.00   12.50
   7  15  -4    5.10   16.80
   7  15  -4   -0.70    8.90
  -7 -15   4    0.20    8.10
   7 -15  -4   -9.90    8.00
   7 -15  -4    7.00   10.50
  -5  15   2   23.70   10.40
   5  15  -2   32.70   10.50
   5  15  -2   22.80   17.20
   5 -15  -2   20.50    9.20
   5 -15  -2   11.30    9.70
   5 -15  -2   44.60    9.70
  -5 -15   2   10.90    8.00
  -3  15   0  157.08   24.90
   3  15   0  143.49   25.20
   3 -15   0  175.68   21.10
  -3 -15   0  140.09   17.60
   3 -15   0  170.78   13.60
   3 -15   0  160.28   12.90
   1  15   2   11.40   11.20
  -1  15  -2    1.90   10.50
  -1 -15  -2   16.00    9.00
   1 -15   2    8.50    3.00
   1 -15   2    0.70    7.30
   1 -15   2    5.50    3.00
  -1  15   4  104.59   22.20
   1  15  -4   55.39   18.10
   1 -15  -4  109.79    8.00
   1 -15  -4   98.39    8.60
  -1 -15   4   88.99   15.10
   1 -15  -4   95.79   17.80
  -3  15   6    6.90    6.30
   3  15  -6   -5.50   13.60
   3  15  -6    4.90    8.90
  -3 -15   6    8.70    6.40
   3 -15  -6    3.10    5.30
   3 -15  -6    2.00    7.60
   5  15  -8  356.46   43.50
   5  15  -8  367.86   27.00
  -5  15   8  353.16   27.50
  -5 -15   8  339.67   25.80
   5 -15  -8  406.96   26.00
   5 -15  -8  374.36   31.00
   7  15 -10   69.19   22.80
   7  15 -10   68.49   13.00
  -7 -15  10   64.59   12.60
   7 -15 -10   58.59   13.40
   7 -15 -10   61.09   15.90
   9  15 -12    8.80   25.10
  -9 -15  12   22.00   10.30
   9 -15 -12    9.20   11.80
   9 -15 -12   14.80   11.60
   8  16  -5    0.50   11.10
   8  16  -5   10.50   20.20
   8 -16  -5   -8.40   11.00
   8 -16  -5   -6.90   10.50
  -8 -16   5    6.80   10.50
   6  16  -3  262.67   40.00
   6 -16  -3  264.77   27.00
   6 -16  -3  292.47   23.00
   6 -16  -3  291.07   24.40
  -6 -16   3  264.17   24.70
   4  16  -1   16.30   16.50
   4 -16  -1   21.80   11.40
  -4 -16   1   26.10    9.50
   4 -16  -1    7.20    6.30
   4 -16  -1   19.00    7.50
  -2  16  -1    8.30   12.80
   2  16   1   19.10   13.00
  -2 -16  -1   16.20    8.60
   2 -16   1   13.90    5.10
   2 -16   1    6.30    8.50
   2 -16   1    8.10    4.50
   0  16   3   34.90   15.30
   0  16  -3   33.90   18.00
   0 -16  -3   39.10   10.80
   0 -16   3   39.50   14.30
   2  16  -5   14.00   15.20
  -2  16   5    6.80   12.10
   2 -16  -5    1.90    5.40
  -2 -16   5   14.20    7.60
   2 -16  -5    1.90    8.00
  -4  16   7   39.10   10.00
   4  16  -7   14.60   18.50
  -4 -16   7   38.00   10.00
   4 -16  -7   34.70    9.10
   4 -16  -7   41.70   12.00
   6  16  -9  193.38   36.00
   6  16  -9  227.68   23.00
   6 -16  -9  207.28   26.10
   6 -16  -9  236.88   22.10
  -6 -16   9  279.87   22.90
   8  16 -11    9.40   32.50
  -8 -16  11   51.69   13.10
   8 -16 -11   29.40   12.70
   8 -16 -11   47.70   13.60
   7  17  -4   35.70   20.00
  -7 -17   4   24.30   11.50
   7 -17  -4   32.90   12.60
   7 -17  -4   27.40   14.90
   5  17  -2   55.09   21.60
   5 -17  -2   62.09   11.70
  -5 -17   2   54.39   16.50
   5 -17  -2   77.09   13.10
   5 -17  -2   46.00   13.10
   3  17   0    3.90   13.20
  -3  17   0   -9.90   11.40
   3 -17   0   16.70    6.40
   3 -17   0   10.50    9.50
  -3 -17   0   14.30    9.50
   3 -17   0   19.80    7.10
  -1  17  -2  104.69   22.40
   1  17   2   66.69   22.30
   1 -17   2  104.59   18.10
  -1 -17  -2  158.48   21.00
  -1  17   4   72.59   19.50
   1  17  -4   44.80   18.50
   1 -17  -4   53.79    5.40
   1 -17  -4   62.09   14.90
  -1 -17   4   50.79   12.90
  -3  17   6   29.60    8.40
   3  17  -6   24.90   18.50
   3 -17  -6   33.40   10.60
   3 -17  -6   25.50    7.80
  -3 -17   6   35.50   11.80
  -5  17   8   30.90   13.90
   5  17  -8   10.30   17.60
   5 -17  -8   42.60   11.50
   5 -17  -8   37.10   12.80
  -5 -17   8   29.70   10.60
   7  17 -10   36.10   27.30
   7  17 -10    6.10   14.30
   7 -17 -10  -10.60   10.70
   7 -17 -10   30.40   11.70
  -7 -17  10   11.10    9.90
   6  18  -3   35.50   25.90
   6 -18  -3    4.70    9.80
   6 -18  -3   25.20   12.70
  -6 -18   3   15.70   11.20
   4  18  -1   34.70   20.20
   4 -18  -1   15.70    7.30
   4 -18  -1   13.50   11.30
  -4 -18   1    6.40   10.20
   4 -18  -1    9.70    8.20
   2  18   1   -1.60   16.60
  -2  18  -1   -3.10   13.50
   2 -18   1   13.40    4.30
  -2 -18  -1    9.90    9.50
   2 -18   1    7.50    4.30
   2 -18   1   22.60   12.70
   0  18  -3    4.10   15.70
   0  18   3   16.30   16.50
   0 -18  -3   40.70   13.70
   0 -18   3   33.10   12.20
   2  18  -5    9.30   18.40
  -2  18   5   31.00   17.30
   2 -18  -5    2.30    8.80
   2 -18  -5    8.10    6.20
  -2 -18   5   16.90    9.90
   2 -18  -5   19.80    5.50
  -4  18   7  -14.40    9.50
   4  18  -7   11.80   21.00
   4 -18  -7   -1.10    8.70
  -4 -18   7    2.20    8.90
   4 -18  -7   12.40    8.90
   6  18  -9   68.09   37.60
   6 -18  -9   68.59   13.50
   6 -18  -9   67.79   20.60
  -6 -18   9   66.79   18.80
   5  19  -2   70.59   30.20
  -5 -19   2   93.29   18.40
   5 -19  -2   93.99   16.60
   5 -19  -2   54.19   15.40
   5 -19  -2   69.09   13.40
   3  19   0   -5.40   16.20
   3 -19   0   12.00   10.50
  -3 -19   0   -7.60   10.20
   3 -19   0    1.10    6.10
   1  19   2   25.00   17.30
  -1  19  -2   44.40   20.50
  -1 -19  -2   27.50   12.10
   1 -19   2   19.10   12.80
   1  19  -4   46.10   16.20
  -1  19   4    9.40   15.60
   1 -19  -4   -1.10    9.50
  -1 -19   4   15.40   12.80
   3  19  -6    4.40   20.10
   3 -19  -6    5.30    7.00
  -3 -19   6   24.90   11.70
   3 -19  -6   10.80    7.50
   3 -19  -6  -12.30   11.00
   5  19  -8  -33.00   22.80
  -5 -19   8   -6.70   11.30
   5 -19  -8    1.20    9.10
   5 -19  -8    7.10   11.90
   4  20  -1    7.20   19.10
   4 -20  -1   -5.80    8.80
   4 -20  -1   -4.00   13.00
  -4 -20   1    2.20   11.20
  -2  20  -1   16.60   20.10
  -2 -20  -1   11.50   11.40
   0  20  -3   21.30   19.90
   0  20   3   25.50   19.00
   0 -20  -3   26.60   13.00
   0 -20   3   34.80   14.80
  -2  20   5   31.60   36.70
   2  20  -5   11.30   18.90
   2 -20  -5   -3.10   12.50
  -2 -20   5    3.40   12.60
   4  20  -7  107.19   28.40
  -4 -20   7   93.49   19.30
   4 -20  -7   74.99   13.50
   4 -20  -7   53.29   16.60
  -1  21  -2   -0.60   20.10
   1  21   2  -19.30   18.50
   1 -21   2   11.40   12.70
  -1 -21  -2    9.80   12.70
  -1  21   4    8.80   20.90
   1  21  -4   12.40   21.40
   1 -21  -4   37.30   17.40
  14   0 -10  -11.80   12.70
  12   0  -8   87.89    8.30
  12   0  -8   71.09   16.60
  12   0  -8   91.79   10.30
  10   0  -6   20.50    9.70
  10   0  -6   15.90    4.40
  10   0  -6   14.00    6.50
   8   0  -4   15.40    4.10
  -8   0   4   14.10    6.20
  -8   0   4   19.10    7.70
   8   0  -4   18.20    7.40
  -6   0   2  158.08   13.60
   6   0  -2  161.88   10.80
  -6   0   2  176.58   13.50
  -4   0   0    6.30    3.10
   4   0   0    3.40    2.80
  -4   0   0    1.50    2.30
   4   0   0    5.00    2.60
   2   0   2 1128.49   46.40
   2   0   2 1139.79   48.00
   2   0   2 1152.88   47.30
  -2   0  -2 1153.28   48.50
   0   0   4   61.09    5.70
   0   0  -4   66.99    5.20
   0   0  -4   63.79    4.70
   2   0  -6  445.06   18.20
   2   0  -6  436.36   20.10
  -2   0   6  398.96   19.90
  -2   0   6  426.36   17.90
   4   0  -8  638.04   26.40
   4   0  -8  640.44   30.70
  -4   0   8  631.14   33.30
  -4   0   8  646.24   26.40
  -6   0  10    2.50    2.30
   6   0 -10    3.40    2.00
   6   0 -10    7.50    4.90
  -6   0  10    7.40    5.00
  -8   0  12   16.30    8.40
   8   0 -12   17.60    2.80
   8   0 -12   25.00    9.10
  -8   0  12   22.30    4.30
  12   0 -16  232.98   27.10
  13   1  -9   17.40   10.80
  13  -1  -9   19.60   12.40
  13  -1  -9    8.70    4.80
  13  -1  -9   15.40    6.60
  11   1  -7   39.70    6.30
 -11   1   7   57.49   20.00
  11   1  -7   45.10    5.90
  11   1  -7   58.39   13.20
  11  -1  -7   46.70    7.50
  11  -1  -7   57.89   13.10
  -9   1   5   49.00   11.20
   9   1  -5   77.69   13.30
   9   1  -5   61.59    9.20
   9   1  -5   56.59    6.80
  -9   1   5   48.30    9.90
   9  -1  -5   73.79   14.20
   9  -1  -5   59.69    8.20
  -9  -1   5   49.90   11.50
  -7   1   3  173.48   14.20
   7   1  -3  178.78   11.40
   7   1  -3  139.09   13.90
  -7   1   3  220.68   17.20
   7   1  -3  197.08   15.90
   7  -1  -3  188.38   16.20
   7  -1  -3  186.78   12.50
  -7  -1   3  179.18   15.80
   5   1  -1  633.94   30.20
  -5   1   1  686.63   32.00
   5   1  -1  704.53   33.30
  -5   1   1  700.33   33.80
   5  -1  -1  711.23   31.10
   5  -1  -1  640.74   33.20
  -5  -1   1  676.23   33.30
  -5  -1   1  661.73   33.50
   3   1   1   57.49    7.00
  -3   1  -1   57.49    6.50
   3   1   1   68.79    6.20
  -3   1  -1   66.59    6.10
   3   1   1   56.69    6.90
   3  -1   1   71.59    6.10
  -3  -1  -1   63.09    6.10
   3  -1   1   65.29    6.40
  -1   1  -3  914.01   37.60
   1   1   3  905.31   38.50
   1   1   3  930.81   38.80
  -1   1  -3  910.31   38.60
   1   1   3  918.81   37.50
  -1  -1  -3  914.01   38.70
   1  -1   3  930.61   38.70
  -1  -1  -3  971.10   37.50
  -1  -1  -3  949.90   38.90
   1   1  -5   25.20    3.50
  -1   1   5   25.40    3.10
  -1   1   5   28.40    3.50
   1   1  -5   23.20    3.10
  -1  -1   5   35.10    3.90
  -1  -1   5   28.40    3.30
   1  -1  -5   22.80    3.20
   1  -1  -5   29.50    3.40
  -3   1   7   23.30    3.20
   3   1  -7   27.20    4.70
  -3   1   7   21.70    4.60
  -3  -1   7   24.50    3.40
   3  -1  -7   21.60    4.40
  -3  -1   7   20.00    4.00
  -3  -1   7   21.70    1.60
   3  -1  -7   21.20    3.20
   5   1  -9  116.69   11.00
  -5   1   9  141.29   12.20
  -5   1   9  134.59    8.30
  -5  -1   9  148.59   11.80
   5  -1  -9  134.29    8.20
   5  -1  -9  114.29   11.10
  -7   1  11   30.20    8.50
  -7   1  11   37.50    5.10
   7   1 -11   37.60    8.60
   7  -1 -11   27.80    4.40
  -7  -1  11   34.80    8.60
   7  -1 -11   31.80    8.50
   9   1 -13   19.40    8.40
  -9   1  13   14.60    5.00
  -9  -1  13   16.70    8.90
   9  -1 -13    6.90    6.60
   9  -1 -13   13.30    3.60
  11   1 -15  102.59   17.30
  11  -1 -15   80.29   16.00
  13   1 -17  378.36   32.80
  13  -1 -17  373.96   33.90
  14   2 -10   42.50   15.60
  14  -2 -10   89.29    9.20
  14  -2 -10   98.19   20.70
  12   2  -8   33.20   11.30
 -12   2   8   43.20   13.10
  12  -2  -8   30.30   11.10
  12  -2  -8   25.00    6.20
  10   2  -6  121.49   17.50
 -10   2   6  131.19   15.70
  10   2  -6  106.49    8.00
  10   2  -6  102.39    8.40
  10  -2  -6  116.09   17.50
  10  -2  -6  102.29   11.50
  -8   2   4   91.19   16.20
   8   2  -4  102.39    9.10
   8   2  -4   91.29    8.00
  -8   2   4   96.99   12.50
   8   2  -4   93.19   12.90
   8  -2  -4  102.79    9.90
   8  -2  -4  100.29   14.00
  -8  -2   4  103.39   14.20
   6   2  -2   16.50    4.30
  -6   2   2    7.70    3.80
   6   2  -2    5.00    4.00
  -6   2   2    2.00    4.50
   6   2  -2   10.50    3.40
   6  -2  -2   14.70    4.40
   6  -2  -2   10.30    5.00
  -6  -2   2    2.60    4.10
  -4   2   0  203.68   12.40
   4   2   0  186.78   12.20
  -4   2   0  221.98   13.70
   4   2   0  185.88   13.20
   4   2   0  187.78   11.70
   4  -2   0  177.88   12.80
  -4  -2   0  171.98   12.00
   4  -2   0  196.38   12.00
  -2   2  -2   24.40    4.10
   2   2   2   25.80    3.10
   2   2   2   30.20    3.80
  -2   2  -2   42.10    5.00
   2   2   2   32.80    4.20
   2  -2   2   26.70    4.40
  -2  -2  -2   20.90    3.50
   2  -2   2   23.80    3.70
   0   2  -4 1148.89   45.30
   0   2   4 1070.99   45.00
   0   2   4 1124.59   44.50
   0   2   4 1042.10   45.70
   0   2  -4 1126.99   44.40
   0   2  -4 1190.78   45.00
   0  -2   4 1117.09   45.10
   0  -2   4 1037.10   44.60
   0  -2  -4 1097.79   45.00
   0  -2   4 1122.49   44.40
   0  -2  -4 1089.99   46.00
   0  -2  -4 1051.29   44.40
   2   2  -6   22.90    2.80
  -2   2   6   20.10    3.10
  -2   2   6   33.80    4.60
   2   2  -6   27.70    3.80
  -2  -2   6   20.70    3.30
   2  -2  -6   27.90    3.80
  -2  -2   6   21.60    2.30
   2  -2  -6   29.90    4.40
  -4   2   8 1485.05   62.09
   4   2  -8 1515.35   63.99
  -4   2   8 1494.45   65.49
   4  -2  -8 1566.14   65.29
   4  -2  -8 1551.64   62.19
  -4  -2   8 1542.15   64.49
  -6   2  10  104.09   13.40
  -6   2  10  121.59    9.10
   6   2 -10  109.19   11.90
   6  -2 -10  104.99   12.60
  -6  -2  10  136.29   12.20
   6  -2 -10  127.09    8.90
  -8   2  12    6.30    8.00
  -8   2  12    5.50    4.20
   8   2 -12    6.40    6.40
  -8  -2  12   -3.80    5.70
   8  -2 -12    9.30    3.70
   8  -2 -12    4.90    5.70
  10   2 -14  152.28   19.30
 -10   2  14  129.99   12.80
  10  -2 -14  128.99   18.40
  10  -2 -14  140.79   10.50
  12   2 -16   12.70   10.40
  12  -2 -16   26.90   11.10
 -13   3   9  125.69   22.10
  13   3  -9  128.19   20.00
  13  -3  -9  146.59   14.40
  13  -3  -9  191.28   25.40
  11   3  -7  282.27   40.10
 -11   3   7  221.08   23.60
  11  -3  -7  242.78   22.80
  11  -3  -7  203.78   16.30
  -9   3   5   58.89   10.60
   9   3  -5   76.69    6.40
   9   3  -5   64.79   10.80
  -9   3   5   53.99   13.00
   9   3  -5   59.99    6.10
   9  -3  -5   63.79    9.50
   9  -3  -5   63.99   11.60
  -9  -3   5   78.19   16.30
   7   3  -3  169.08   10.30
   7   3  -3  161.98   10.60
   7   3  -3  173.08   14.40
  -7   3   3  154.88   15.50
  -7   3   3  130.29   13.00
   7  -3  -3  143.99   12.30
  -7  -3   3  141.09   13.70
   7  -3  -3  158.18   15.30
   5   3  -1   43.20    7.30
  -5   3   1   46.10    7.20
  -5   3   1   32.10    6.70
   5   3  -1   31.00    6.30
   5   3  -1   39.90    5.30
  -5  -3   1   40.00    6.80
   5  -3  -1   52.29    7.00
   5  -3  -1   37.90    7.20
  -3   3  -1    9.70    3.70
   3   3   1   25.90    4.00
   3   3   1   11.70    2.60
   3   3   1   16.40    3.70
  -3   3  -1   16.20    3.90
   3  -3   1    9.20    3.40
   3  -3   1   12.10    3.40
  -3  -3  -1   16.60    3.50
  -1   3  -3   37.50    3.70
   1   3   3   49.90    6.90
   1   3   3   51.59    5.40
   1   3   3   35.70    3.60
  -1   3  -3   38.70    4.70
  -1   3  -3   41.20    5.10
   1  -3   3   39.80    4.80
  -1  -3  -3   49.10    4.80
   1  -3   3   47.20    5.70
  -1  -3  -3   51.69    3.70
   1  -3   3   35.40    3.60
   1  -3   3   43.00    4.30
  -1  -3  -3   60.69    7.90
  -1   3   5  158.48    9.30
   1   3  -5  178.98   12.10
  -1   3   5  151.28   11.20
   1   3  -5  168.38    9.00
   1   3  -5  149.39    8.60
   1  -3  -5  177.28    9.50
  -1  -3   5  175.58    9.10
  -1  -3   5  166.88    8.50
   1  -3  -5  140.49    9.40
   1  -3  -5  159.38   11.50
  -3   3   7  581.24   27.60
  -3   3   7  600.74   29.10
   3   3  -7  609.34   24.90
   3   3  -7  657.53   27.80
  -3  -3   7  626.74   27.70
   3  -3  -7  623.34   28.90
   3  -3  -7  569.14   27.50
  -3  -3   7  599.84   24.50
   5   3  -9  143.29   11.50
  -5   3   9  146.79   13.00
  -5   3   9  142.89   10.40
   5  -3  -9  128.89    9.90
  -5  -3   9  151.88   12.00
   5  -3  -9  168.08   13.10
   7   3 -11  748.53   37.40
  -7   3  11  672.13   38.90
  -7   3  11  711.93   33.90
   7  -3 -11  770.82   39.20
  -7  -3  11  717.83   38.10
   7  -3 -11  703.63   33.40
   9   3 -13  116.79   15.50
   9  -3 -13  122.29   10.60
  -9  -3  13  132.29   17.40
   9  -3 -13   90.39   14.10
 -11   3  15   63.39   11.50
  11   3 -15   50.79   12.20
  11  -3 -15   48.40   13.30
  11  -3 -15   33.50    6.90
  13   3 -17   44.70   12.70
  13  -3 -17   77.49   18.90
  14   4 -10   21.40   11.80
  14  -4 -10   37.70   16.30
  14  -4 -10   22.70    8.00
 -12   4   8   96.99   17.40
  12   4  -8  113.79   18.60
  12  -4  -8   89.59   17.80
  12  -4  -8   86.69   12.50
  10   4  -6  477.35   30.00
  10   4  -6  421.66   18.30
 -10   4   6  453.65   29.20
  10   4  -6  414.66   18.20
  10  -4  -6  430.46   25.60
 -10  -4   6  441.66   30.80
  -8   4   4   73.69   11.10
   8   4  -4   90.99    7.00
   8   4  -4  101.09    8.00
  -8   4   4   50.99   11.10
   8   4  -4   82.99   12.20
   8  -4  -4   82.89   13.70
  -8  -4   4   85.79   12.90
   8  -4  -4  102.19   11.90
  -6   4   2  437.96   27.00
  -6   4   2  499.35   26.10
   6   4  -2  468.95   21.90
   6   4  -2  474.15   25.20
   6   4  -2  440.26   24.90
  -6  -4   2  439.86   25.10
   6  -4  -2  430.66   24.60
   6  -4  -2  463.75   27.10
  -4   4   0    9.20    5.00
  -4   4   0    4.50    3.20
   4   4   0    6.00    3.00
   4   4   0    6.20    2.80
  -4  -4   0    1.30    2.50
   4  -4   0    3.70    3.30
   4  -4   0    5.70    4.00
  -4  -4   0    1.00    2.30
  -2   4  -2    9.20    2.90
   2   4   2    5.90    2.10
   2   4   2    6.60    1.90
   2   4   2   11.00    4.80
   2   4   2    7.90    2.70
  -2   4  -2    5.60    3.00
   2  -4   2    8.50    3.00
  -2  -4  -2    9.60    3.00
   2  -4   2    6.10    3.00
  -2  -4  -2    5.00    4.20
   2  -4   2    4.10    2.90
   0   4  -4    9.50    1.80
   0   4   4    9.40    3.80
   0   4  -4   12.70    3.10
   0   4   4   10.20    2.20
   0   4  -4    5.20    2.90
   0   4   4    6.50    2.80
   0  -4   4   11.00    2.10
   0  -4   4   14.70    3.20
   0  -4  -4   10.80    2.50
   0  -4   4   11.60    4.30
   0  -4  -4    9.70    4.00
   0  -4  -4   13.90    3.40
   2   4  -6   37.40    4.30
  -2   4   6   33.00    4.60
   2   4  -6   29.40    3.90
  -2   4   6   27.10    4.50
  -2  -4   6   40.30    4.50
  -2  -4   6   38.20    3.80
   2  -4  -6   38.50    6.80
   2  -4  -6   39.50    5.20
   2  -4  -6   39.00    5.60
   4   4  -8 1081.19   42.80
  -4   4   8 1072.69   49.00
  -4   4   8 1096.29   47.30
   4   4  -8 1109.99   46.60
   4  -4  -8 1051.29   48.30
   4  -4  -8 1059.79   46.90
  -4  -4   8 1046.70   46.50
  -4  -4   8 1089.49   42.60
  -6   4  10  778.22   37.50
  -6   4  10  761.12   40.20
   6  -4 -10  758.22   39.40
  -6  -4  10  768.42   37.90
   6  -4 -10  761.92   36.00
  -8   4  12  544.85   28.70
  -8   4  12  506.15   34.00
   8   4 -12  563.14   31.50
   8  -4 -12  594.74   34.30
  -8  -4  12  508.35   31.70
   8  -4 -12  542.25   28.00
 -10   4  14   50.69    9.30
  10   4 -14   60.49   12.20
  10  -4 -14   73.09   13.10
  10  -4 -14   56.29    9.20
 -12   4  16  280.87   23.80
  12   4 -16  303.17   26.80
  12  -4 -16  271.17   27.40
  12  -4 -16  280.37   18.50
  13   5  -9   20.00    9.90
  13  -5  -9   -2.10   11.10
  13  -5  -9   26.80    8.40
  11   5  -7   24.50    9.30
 -11   5   7    2.80    9.70
  11  -5  -7   12.50    6.30
  11  -5  -7   13.30   11.30
   9   5  -5   85.69    6.80
   9   5  -5  125.59   15.30
  -9   5   5  118.49   15.70
   9   5  -5   85.79    7.10
   9  -5  -5  108.59   17.00
   9  -5  -5  112.49   13.10
  -9  -5   5   85.89   13.70
   7   5  -3   74.29    7.00
   7   5  -3   88.39   11.60
  -7   5   3   68.99   10.60
   7   5  -3   81.59   10.40
  -7   5   3   87.79   12.50
   7  -5  -3   88.59   11.30
   7  -5  -3   96.29   13.50
  -7  -5   3   98.79   12.50
  -5   5   1   32.00    6.50
   5   5  -1   37.20    5.40
   5   5  -1   38.00    6.20
  -5   5   1   18.80    5.40
   5  -5  -1   41.20    7.00
  -5  -5   1   34.70    6.40
  -5  -5   1   44.30    6.80
  -3   5  -1  159.68   12.60
   3   5   1  194.38   11.80
   3   5   1  177.08   10.20
  -3   5  -1  197.58   12.90
   3   5   1  187.48   10.00
   3   5   1  199.58   17.10
   3  -5   1  196.48   13.50
   3  -5   1  186.28   12.70
  -3  -5  -1  190.38   12.00
   3  -5   1  197.88   15.10
   1   5   3   44.70    8.40
  -1   5  -3   46.90    7.10
   1   5   3   35.40    3.70
  -1   5  -3   45.30    6.40
   1   5   3   54.19    6.80
   1  -5   3   49.10    4.90
  -1  -5  -3   56.39    9.90
   1  -5   3   55.59    7.00
  -1  -5  -3   44.60    3.70
   1  -5   3   50.99    4.50
   1  -5   3   51.59    7.50
  -1  -5  -3   37.70    5.60
   1   5  -5  100.39    7.70
  -1   5   5   82.79    6.60
   1   5  -5  100.59   12.50
  -1   5   5  101.89    8.40
  -1   5   5  106.19   10.60
   1   5  -5   92.49    5.80
  -1  -5   5  102.99   10.30
  -1  -5   5   98.59    7.50
   1  -5  -5  104.39   10.70
  -1  -5   5   85.79    5.50
   1  -5  -5   75.89    7.80
   1  -5  -5   82.89    6.80
   3   5  -7    6.60    2.50
  -3   5   7    2.10    2.90
   3   5  -7    5.00    2.60
  -3   5   7    3.80    3.80
  -3  -5   7    4.10    1.90
  -3  -5   7    2.20    2.30
   3  -5  -7   -1.10    3.90
   3  -5  -7    4.60    3.20
   3  -5  -7    1.70    2.70
  -5   5   9  725.73   34.20
   5   5  -9  734.93   33.00
   5   5  -9  668.73   28.00
  -5   5   9  667.53   35.90
  -5  -5   9  661.83   28.00
   5  -5  -9  672.93   35.00
   5  -5  -9  714.23   33.80
   7   5 -11    8.70    5.30
  -7   5  11   11.70    7.30
  -7   5  11    3.90    5.30
   7  -5 -11    7.40    6.20
   7  -5 -11   19.50    5.90
  -7  -5  11   21.40    7.10
   9   5 -13   48.70   10.30
  -9   5  13   39.10    9.20
   9  -5 -13   16.50    8.10
   9  -5 -13   42.60    7.90
  -9  -5  13   14.70    8.20
  11   5 -15   12.60    8.90
 -11   5  15   13.00    9.50
  11  -5 -15    9.40    6.90
  11  -5 -15   20.70    9.60
  13   5 -17   61.39   14.80
  13  -5 -17   52.99    9.40
  13  -5 -17   76.29   16.40
  12   6  -8    8.90    8.30
 -12   6   8    6.20   13.70
  12  -6  -8   24.80   12.20
  12  -6  -8    7.20    6.70
 -10   6   6  337.77   27.60
  10   6  -6  332.67   24.60
  10  -6  -6  379.46   24.60
 -10  -6   6  334.07   26.40
  10  -6  -6  350.86   28.10
  -8   6   4   -3.30    6.60
   8   6  -4   13.20    3.60
   8   6  -4    8.70    5.50
   8   6  -4   21.80    6.70
  -8   6   4   16.50    6.30
   8  -6  -4   14.80    7.80
  -8  -6   4   19.00    7.00
   8  -6  -4   14.80    6.40
   6   6  -2  239.68   15.20
  -6   6   2  214.08   16.70
  -6   6   2  201.48   17.50
   6   6  -2  205.68   13.00
  -6  -6   2  209.78   15.30
  -6  -6   2  214.28   15.10
   6  -6  -2  219.08   17.80
   6  -6  -2  217.88   16.40
   4   6   0   27.30    4.30
   4   6   0   30.00    4.80
  -4   6   0   23.30    5.80
  -4   6   0   26.30    6.20
   4   6   0   31.10    5.60
   4  -6   0   32.90    6.90
  -4  -6   0   32.30    5.60
   4  -6   0   22.40    5.50
   4  -6   0   43.70    9.70
  -2   6  -2   79.09   10.40
  -2   6  -2   63.39    8.30
   2   6   2   70.29   11.50
   2   6   2   76.99    5.10
  -2   6  -2   69.49    7.10
   2   6   2   78.19    7.50
   2   6   2   70.19    5.20
  -2  -6  -2   89.19   15.40
   2  -6   2   77.79   10.10
   2  -6   2   83.49    7.00
  -2  -6  -2   65.09    8.10
   2  -6   2   67.09    8.70
   0   6   4  391.66   17.20
   0   6   4  349.17   23.10
   0   6  -4  383.96   20.00
   0   6   4  388.96   20.50
   0   6  -4  395.26   23.70
   0  -6   4  369.16   19.80
   0  -6  -4  395.36   24.10
   0  -6   4  362.06   22.70
   0  -6   4  380.26   16.90
   0  -6  -4  375.66   17.30
   0  -6   4  362.76   16.70
   0  -6  -4  338.77   19.80
   2   6  -6   96.99   13.60
  -2   6   6  105.49    9.50
   2   6  -6   99.69    6.90
   2   6  -6  115.89    8.60
  -2   6   6   97.39    8.70
  -2  -6   6  111.19    6.40
   2  -6  -6  108.79    9.70
  -2  -6   6  115.99    8.50
   2  -6  -6   94.29    8.30
   2  -6  -6   80.69   11.90
   4   6  -8  331.37   17.30
  -4   6   8  309.57   19.60
   4   6  -8  339.87   16.30
  -4   6   8  296.87   20.10
   4  -6  -8  296.97   23.80
   4  -6  -8  342.17   20.00
  -4  -6   8  330.67   16.20
  -4  -6   8  348.17   17.60
   4  -6  -8  330.67   19.70
   6   6 -10  133.79   11.50
  -6   6  10  119.99   14.80
   6   6 -10  119.49    6.00
  -6   6  10  119.29   11.90
  -6  -6  10  131.19   13.70
   6  -6 -10  126.59   12.20
   6  -6 -10  110.69   14.10
   8   6 -12  247.88   18.70
  -8   6  12  232.18   18.70
  -8  -6  12  237.38   19.80
   8  -6 -12  252.67   21.40
   8  -6 -12  252.77   17.80
 -10   6  14   62.79   12.60
  10   6 -14   75.99   13.30
  10  -6 -14   68.29   10.90
  10  -6 -14   67.69   14.40
  12   6 -16   17.10    9.60
 -12   6  16  -23.30   11.90
  12  -6 -16   16.70    7.70
  12  -6 -16   20.40   12.30
  13   7  -9   62.89   14.40
  13  -7  -9   48.70   12.30
  13  -7  -9   65.29   17.00
  11   7  -7   22.10    8.80
 -11   7   7   28.20   13.10
  11  -7  -7   26.10   11.40
  11  -7  -7   11.50    7.70
  -9   7   5   96.39   17.00
   9   7  -5   78.69   11.90
   9   7  -5   89.99    9.30
   9   7  -5   90.49    7.20
  -9  -7   5   75.09   11.90
   9  -7  -5   62.99   11.40
   9  -7  -5   68.99   13.40
   7   7  -3  222.18   13.40
  -7   7   3  161.78   17.20
  -7   7   3  275.97   33.50
   7   7  -3  229.18   16.00
   7  -7  -3  201.38   18.70
  -7  -7   3  221.58   16.30
  -7  -7   3  227.08   16.20
   7  -7  -3  199.38   17.10
  -5   7   1   99.09   13.00
   5   7  -1   87.89    8.40
   5   7  -1   82.69    7.80
   5   7  -1   77.09   14.80
   5   7  -1   74.99    6.90
  -5   7   1   72.29   11.00
   5  -7  -1   68.29   10.10
   5  -7  -1   64.49   12.60
   5  -7  -1   73.79   10.10
  -5  -7   1   81.19    9.50
   3   7   1 1017.50   42.80
   3   7   1 1075.69   43.00
   3   7   1 1100.99   60.69
  -3   7  -1 1012.90   48.80
  -3   7  -1 1090.89   47.60
   3   7   1 1012.70   46.50
   3  -7   1 1110.99   49.50
   3  -7   1 1060.99   51.89
   3  -7   1 1038.50   46.90
  -3  -7  -1 1079.49   47.50
   1   7   3  385.26   16.60
  -1   7  -3  363.96   21.40
   1   7   3  355.76   25.50
   1   7   3  393.86   21.20
  -1   7  -3  393.66   24.60
   1  -7   3  338.47   23.40
  -1  -7  -3  398.76   21.60
   1  -7   3  388.16   18.40
   1  -7   3  408.56   18.20
   1  -7   3  399.56   22.00
  -1  -7  -3  384.56   16.80
  -1  -7  -3  392.56   26.20
   1   7  -5  146.49   15.70
  -1   7   5  153.78   15.10
   1   7  -5  160.98    7.70
   1   7  -5  156.88   11.60
  -1   7   5  148.89   10.00
  -1   7   5  155.28   12.20
  -1  -7   5  143.59   11.30
  -1  -7   5  167.28   20.00
  -1  -7   5  175.68    7.80
   1  -7  -5  149.99   15.20
   1  -7  -5  145.09    9.70
   1  -7  -5  160.98   12.30
  -3   7   7   -0.30    4.20
  -3   7   7    5.50    4.10
   3   7  -7    5.70    2.20
   3   7  -7    2.00    5.70
   3   7  -7    8.90    3.40
  -3  -7   7    5.80    3.00
   3  -7  -7    4.20    3.50
   3  -7  -7    4.40    4.90
  -3  -7   7    5.00    2.30
   3  -7  -7    3.80    5.70
   5   7  -9   83.09    6.80
   5   7  -9   80.79    8.90
  -5   7   9   93.99   12.60
  -5   7   9   71.99   11.00
  -5  -7   9   83.99    9.20
   5  -7  -9   64.99   10.10
  -5  -7   9   74.29    6.70
   5  -7  -9   76.19   10.30
   5  -7  -9   67.99   14.10
  -7   7  11   53.99   12.60
   7   7 -11   68.39    9.80
  -7   7  11   41.50    8.60
   7  -7 -11   43.20    9.30
  -7  -7  11   65.99    9.60
   7  -7 -11   51.09   11.00
   9   7 -13   10.30    6.50
  -9   7  13   15.90    8.10
   9  -7 -13    3.30    7.30
  -9  -7  13    3.60    8.70
   9  -7 -13    0.70    5.40
  11   7 -15   58.59   14.60
 -11   7  15   45.00   14.20
  11  -7 -15   38.70   10.30
  11  -7 -15   62.69   15.80
  12   8  -8   23.30   11.10
  12  -8  -8   30.50   10.20
  12  -8  -8   18.50   13.60
 -10   8   6   19.40   11.80
  10   8  -6   17.30    7.80
  10   8  -6   21.30    4.20
  10   8  -6   31.70    3.80
 -10  -8   6   10.30    8.70
  10  -8  -6    9.60    7.60
  10  -8  -6   17.70   10.10
   8   8  -4  286.97   37.80
   8   8  -4  277.07   18.00
   8   8  -4  255.27   14.90
  -8   8   4  241.18   23.30
   8   8  -4  216.68   19.60
   8   8  -4  266.97   18.40
  -8   8   4  270.57   25.20
   8  -8  -4  305.17   23.30
   8  -8  -4  239.28   20.20
   8  -8  -4  178.48   25.40
  -8  -8   4  239.78   18.60
   6   8  -2  178.18   26.60
   6   8  -2  181.18   12.40
   6   8  -2  193.98   14.80
  -6   8   2  178.18   16.40
   6   8  -2  171.18   12.60
  -6   8   2  175.38   16.40
  -6  -8   2  173.68   14.30
   6  -8  -2  173.78   16.40
   6  -8  -2  196.28   17.10
   6  -8  -2  208.88   24.20
   4   8   0 2140.59   87.79
   4   8   0 2072.79   99.49
  -4   8   0 2133.89   91.09
  -4   8   0 2070.69   89.39
   4   8   0 2093.59   83.49
   4   8   0 2159.58   83.69
  -4  -8   0 2123.29   88.39
   4  -8   0 2150.58   88.89
   4  -8   0 1974.40   90.29
   4  -8   0 2159.18   95.49
   2   8   2  758.92   30.20
  -2   8  -2  773.12   41.10
   2   8   2  781.72   44.60
   2   8   2  705.63   36.40
   2   8   2  726.03   30.30
  -2   8  -2  781.12   38.40
  -2  -8  -2  791.32   37.30
  -2  -8  -2  801.52   44.50
   2  -8   2  797.12   38.40
   2  -8   2  797.62   34.80
   2  -8   2  779.22   41.40
   0   8  -4   14.50    7.10
   0   8  -4   31.60    6.70
   0   8   4   35.80    9.10
   0   8   4   20.00    3.50
   0   8   4   27.40    6.50
   0  -8   4   22.80    7.50
   0  -8  -4   27.60    3.90
   0  -8  -4   32.90   10.00
   0  -8  -4   30.00    6.60
   0  -8   4   21.10    3.10
   0  -8   4   25.50    3.30
   0  -8   4   19.70    5.90
   2   8  -6  182.28    8.90
  -2   8   6  171.28   14.80
  -2   8   6  182.28   12.80
   2   8  -6  233.28   22.10
  -2   8   6  178.68   17.80
   2  -8  -6  193.08   18.40
   2  -8  -6  174.88   12.10
  -2  -8   6  181.48   13.00
  -2  -8   6  193.98    8.70
   2  -8  -6  204.08   15.20
   4   8  -8   97.19    8.80
   4   8  -8  109.49    8.20
  -4   8   8  117.59   14.30
   4   8  -8   70.49   15.70
  -4   8   8   90.09   11.60
   4  -8  -8  106.29   11.50
  -4  -8   8   94.09    8.90
   4  -8  -8  117.59   17.70
  -4  -8   8   99.69    7.90
   4  -8  -8  122.49   12.10
   6   8 -10   15.10    5.20
  -6   8  10   -1.40    5.70
   6   8 -10    8.80    3.00
   6   8 -10    9.40   11.20
  -6   8  10    6.30    6.80
  -6  -8  10   10.30    3.80
  -6  -8  10   12.10    5.30
   6  -8 -10    9.00    5.70
   6  -8 -10   11.60    6.70
   6  -8 -10    1.80    8.50
  -8   8  12   12.70    8.40
   8   8 -12   14.80    6.10
   8  -8 -12   22.80    9.90
   8  -8 -12   17.20    7.60
  -8  -8  12   22.90    8.10
  10   8 -14  359.76   25.60
 -10   8  14  315.77   27.80
  10  -8 -14  309.47   28.10
  10  -8 -14  294.97   23.40
 -10  -8  14  340.97   27.40
  12   8 -16    0.40    9.20
  12  -8 -16   11.90    8.50
  12  -8 -16   47.60   17.80
  13   9  -9   63.79   14.50
  13  -9  -9   51.09   17.50
  11   9  -7   -3.00    7.60
  11   9  -7    2.20    9.40
  11   9  -7    8.40   16.10
  11  -9  -7   -0.10    8.10
  11  -9  -7   12.60    9.80
   9   9  -5   21.10    7.90
   9   9  -5    8.10    6.60
   9   9  -5    7.20    3.80
   9   9  -5   14.70    6.60
   9   9  -5  -14.90   12.50
  -9   9   5   20.30   12.20
   9  -9  -5   -1.80    8.70
   9  -9  -5   15.20    7.90
   7   9  -3  358.46   20.20
   7   9  -3  350.96   19.80
  -7   9   3  314.37   25.10
  -7   9   3  347.77   25.70
   7   9  -3  340.17   19.50
   7   9  -3  372.96   35.50
  -7  -9   3  344.77   22.20
   7  -9  -3  378.56   31.40
   7  -9  -3  324.27   24.60
   7  -9  -3  330.67   24.60
   5   9  -1   32.20    4.80
   5   9  -1   28.60    4.90
   5   9  -1   30.30    6.60
  -5   9   1   17.80    7.90
  -5   9   1   18.30    7.50
   5   9  -1    6.70    8.70
  -5  -9   1   24.80    6.70
   5  -9  -1   14.40    6.60
   5  -9  -1   24.50   10.60
   5  -9  -1   28.20    7.20
   3   9   1 3944.61  154.98
  -3   9  -1 3915.61  157.58
   3   9   1 3724.33  165.38
  -3   9  -1 3784.62  156.68
   3  -9   1 3906.81  153.28
   3  -9   1 3945.31  157.28
  -3  -9  -1 3601.74  165.08
   3  -9   1 3825.92  161.48
  -3  -9  -1 3827.02  155.28
   1   9   3   66.29    9.80
  -1   9  -3   93.39   11.90
   1   9   3   70.09    4.80
   1   9   3   86.39   15.50
   1  -9   3   90.89   11.90
   1  -9   3   72.09    6.50
  -1  -9  -3   74.69    4.80
   1  -9   3   77.19    6.30
   1  -9   3   63.39   11.60
  -1  -9  -3   92.39   15.30
  -1  -9  -3   60.69    9.80
  -1   9   5  340.07   17.60
   1   9  -5  312.47   20.30
  -1   9   5  312.17   24.70
   1   9  -5  327.17   26.10
  -1   9   5  324.57   21.20
   1  -9  -5  328.97   21.40
   1  -9  -5  316.37   25.50
   1  -9  -5  370.76   17.70
  -1  -9   5  326.47   25.40
  -1  -9   5  334.97   20.40
  -3   9   7   51.99    9.40
   3   9  -7   50.29    7.40
  -3   9   7   59.19    8.40
   3   9  -7   62.29   14.90
   3   9  -7   51.69    4.90
  -3  -9   7   64.29    8.50
   3  -9  -7   57.99    8.40
   3  -9  -7   63.59   13.90
   3  -9  -7   65.09   10.80
  -3  -9   7   55.19    4.40
   5   9  -9    7.00    3.80
  -5   9   9    4.30    5.80
   5   9  -9   11.60   10.00
   5   9  -9    3.90    3.60
  -5   9   9   -2.10    4.90
   5  -9  -9   -1.70    8.00
   5  -9  -9    4.10    4.70
  -5  -9   9    5.80    3.60
   5  -9  -9   -3.20    5.20
  -5  -9   9    8.00    4.00
  -7   9  11  134.49   16.40
  -7   9  11  177.78   21.40
   7   9 -11  161.48   10.30
   7   9 -11  128.69   26.80
   7  -9 -11  161.38   18.10
   7  -9 -11  139.59   16.80
  -7  -9  11  156.98   14.30
  -7  -9  11  167.38   11.20
   9   9 -13   19.40    7.40
  -9   9  13   32.00   11.80
   9  -9 -13   31.90   11.70
  -9  -9  13   10.20    9.50
   9  -9 -13   26.80    8.80
  11   9 -15  279.67   25.30
  11  -9 -15  369.16   30.70
  11  -9 -15  290.87   24.90
  12  10  -8   29.60   22.10
  12 -10  -8   39.70   19.30
  12 -10  -8   30.50   11.60
  10  10  -6   36.00    9.30
  10  10  -6   34.60    5.80
  10  10  -6   34.60    7.70
  10  10  -6   50.29    9.90
  10  10  -6   26.00   19.40
  10 -10  -6   35.30   11.70
   8  10  -4   55.89   18.10
   8  10  -4   91.59   10.00
   8  10  -4   91.69   10.60
   8 -10  -4  103.69   15.40
   8 -10  -4   80.29   13.80
  -8 -10   4  102.59   13.80
   6  10  -2   16.10    4.10
   6  10  -2   18.00   12.50
  -6  10   2    5.40    7.40
  -6  10   2   12.60    8.10
   6  10  -2   11.80    4.90
   6  10  -2   17.10    4.30
   6 -10  -2   18.20    7.30
   6 -10  -2   19.40   10.60
   6 -10  -2   17.00    8.10
  -6 -10   2    6.70    5.20
  -4  10   0   21.30    8.40
  -4  10   0   15.20    6.10
   4  10   0   13.80    2.40
   4  10   0   14.70    6.00
   4  10   0   22.80   10.50
   4  10   0   13.80    1.90
  -4 -10   0   16.20    6.40
   4 -10   0   19.80    9.60
   4 -10   0    8.10    6.10
  -2  10  -2 1379.76   61.59
  -2  10  -2 1478.85   67.09
   2  10   2 1294.97   67.89
   2  10   2 1296.27   59.59
  -2 -10  -2 1271.97   68.39
   2 -10   2 1262.27   54.69
  -2 -10  -2 1234.18   59.29
   2 -10   2 1333.87   60.99
   2 -10   2 1270.57   65.19
   2 -10   2 1261.77   55.09
   0  10  -4   32.40    7.70
   0  10  -4   28.90   11.10
   0  10   4   15.10    3.30
   0  10   4   33.10    7.70
   0  10   4   40.80   10.70
   0 -10   4   24.50    8.70
   0 -10  -4   14.10    8.30
   0 -10   4   22.00    6.10
   0 -10   4   17.50    2.90
   0 -10  -4   27.40    4.30
   0 -10   4   20.20    3.30
   0 -10  -4   13.80    5.30
   2  10  -6  298.97   19.90
  -2  10   6  331.17   26.50
  -2  10   6  331.67   22.50
   2  10  -6  305.37   27.70
  -2  10   6  310.47   18.30
   2 -10  -6  280.07   26.60
   2 -10  -6  320.97   18.10
  -2 -10   6  324.67   20.30
   2 -10  -6  312.57   21.90
   4  10  -8   17.10    5.80
  -4  10   8   12.30    6.10
   4  10  -8   25.10    4.40
   4  10  -8   13.40    9.70
  -4  10   8   22.50    6.40
   4 -10  -8   33.60   14.30
  -4 -10   8   19.60    5.80
  -4 -10   8   15.80    3.20
   4 -10  -8    7.60    5.20
   4 -10  -8   11.90    5.80
   6  10 -10   20.80    5.60
  -6  10  10    7.00    6.90
   6  10 -10   18.30    5.30
   6  10 -10   34.20   15.80
  -6  10  10   27.50    9.10
  -6 -10  10   14.90    5.30
   6 -10 -10   10.30    7.10
   6 -10 -10   20.40    8.30
  -6 -10  10   10.30    4.90
   8  10 -12  100.39   25.90
   8  10 -12  134.39   12.90
   8  10 -12  115.29    8.00
   8 -10 -12   84.89   13.90
  -8 -10  12  126.19   14.40
  10  10 -14   65.29   12.10
  10  10 -14  103.09   32.20
  10 -10 -14   97.29   18.10
 -10 -10  14   75.09   14.30
  10 -10 -14   74.19   15.50
  12  10 -16  -15.40   27.90
  12  10 -16    6.40   10.90
  12 -10 -16    1.40   12.80
  12 -10 -16    1.60    9.50
  11  11  -7   12.50    9.40
  11  11  -7   17.90    9.10
  11  11  -7   10.30   21.20
  11 -11  -7   13.60    9.70
  11 -11  -7    9.30   11.90
   9  11  -5   20.50    7.10
   9  11  -5   34.30   12.10
   9  11  -5   30.40    7.10
   9  11  -5   37.20    7.20
   9  11  -5   45.60   20.80
   9 -11  -5   29.80   11.00
   9 -11  -5   41.60   10.10
   7  11  -3  215.18   35.60
  -7  11   3  204.18   20.20
   7  11  -3  203.08   13.00
   7  11  -3  183.28   15.50
   7  11  -3  200.98   13.20
   7 -11  -3  210.48   19.60
   7 -11  -3  210.38   20.40
  -7 -11   3  201.18   17.60
   5  11  -1  423.86   26.00
  -5  11   1  427.66   27.70
   5  11  -1  483.35   19.30
  -5  11   1  461.85   30.50
   5  11  -1  431.96   19.60
   5  11  -1  431.56   37.80
   5 -11  -1  410.46   34.40
   5 -11  -1  510.45   30.60
  -5 -11   1  466.05   27.60
   5 -11  -1  454.75   27.20
   3  11   1   11.30    5.50
  -3  11  -1   13.70    8.60
   3  11   1   14.10    9.10
  -3  11  -1   10.90    5.30
   3 -11   1    8.90    5.00
   3 -11   1   15.70    9.60
  -3 -11  -1   15.80    6.50
  -3 -11  -1   19.50   19.40
   3 -11   1   14.90    4.90
   3 -11   1   26.50    7.90
  -1  11  -3  251.47   19.40
  -1  11  -3  254.27   23.80
   1  11   3  251.57   19.40
   1  11   3  243.08   25.00
   1 -11   3  228.28   23.40
  -1 -11  -3  251.87   19.40
   1 -11   3  227.88   18.80
  -1 -11  -3  245.28   25.10
   1 -11   3  270.67   13.50
   1 -11   3  261.67   13.60
   1  11  -5   47.10   13.50
   1  11  -5   73.99   11.00
  -1  11   5   64.49   15.10
  -1  11   5   60.99    7.50
  -1  11   5   65.49   11.40
   1 -11  -5   59.29   11.20
  -1 -11   5   65.29   10.80
   1 -11  -5   69.59    7.70
   1 -11  -5   54.29   13.10
  -1 -11   5   98.69   16.50
  -3  11   7   28.10    6.80
  -3  11   7   49.99   10.10
   3  11  -7   14.70    5.40
   3  11  -7    9.90   11.60
   3 -11  -7   43.50    7.50
  -3 -11   7   23.70    6.70
   3 -11  -7   35.10   11.40
   3 -11  -7   39.40    9.60
   5  11  -9   23.10    6.60
  -5  11   9   12.20    8.20
   5  11  -9   17.80    4.10
  -5  11   9   15.40    7.70
   5  11  -9   27.20   12.00
   5 -11  -9   37.20   22.30
  -5 -11   9   25.70    6.90
  -5 -11   9   22.30    4.10
   5 -11  -9   19.70    6.90
   5 -11  -9   19.20    7.90
   7  11 -11   -2.70   17.50
   7  11 -11    9.60    5.00
   7  11 -11    6.90    4.90
  -7 -11  11   -6.10    5.10
   7 -11 -11    7.40    7.50
   7 -11 -11    3.60    6.80
  -7 -11  11   -2.70    4.60
   9  11 -13   41.80    9.60
   9  11 -13   24.10   19.90
  -9 -11  13   29.50   10.20
   9 -11 -13   53.79   12.70
   9 -11 -13   54.09   11.40
  11  11 -15   59.09   32.00
  11  11 -15   29.00   11.00
  11 -11 -15    8.90   12.40
  11 -11 -15   16.40   11.10
  10  12  -6    5.00    9.40
  10  12  -6   26.60   18.50
  10  12  -6   14.10   10.00
  10  12  -6    3.40    6.50
  10  12  -6    3.40    8.10
  10 -12  -6   20.40   11.40
  10 -12  -6   -6.00    8.70
   8  12  -4  313.77   23.70
   8  12  -4  309.57   18.70
   8  12  -4  308.27   21.10
   8  12  -4  293.37   40.90
   8 -12  -4  273.37   25.40
  -8 -12   4  351.86   24.50
   8 -12  -4  410.76   28.00
  -6  12   2  375.26   27.10
   6  12  -2  368.16   16.00
   6  12  -2  330.67   41.70
   6  12  -2  341.27   16.50
   6  12  -2  359.46   23.70
   6 -12  -2  379.76   27.60
   6 -12  -2  322.47   24.20
  -6 -12   2  344.27   23.90
   4  12   0   15.40   10.20
  -4  12   0   24.50    9.80
  -4  12   0   17.50    7.10
   4  12   0    6.60    5.90
   4 -12   0    1.90    5.10
   4 -12   0    6.40    5.60
   4 -12   0   29.30   12.30
  -4 -12   0    7.70    6.80
   2  12   2  182.78   26.80
  -2  12  -2  145.39   20.30
  -2  12  -2  191.58   18.50
   2  12   2  207.38   17.50
  -2 -12  -2  211.18   26.30
  -2 -12  -2  183.38   17.20
   2 -12   2  211.38   12.50
   2 -12   2  162.38   12.00
   2 -12   2  218.08   25.60
   2 -12   2  162.38   17.00
   0  12   4  316.67   27.30
   0  12  -4  257.47   20.20
   0  12  -4  220.88   27.30
   0  12   4  257.47   13.20
   0 -12  -4  248.18   13.30
   0 -12   4  263.27   20.30
   0 -12  -4  266.87   20.50
   0 -12  -4  228.88   28.40
   0 -12   4  219.58   25.80
   0 -12   4  237.58   11.30
  -2  12   6  225.68   23.70
   2  12  -6  194.08   26.50
   2  12  -6  214.98   17.70
  -2  12   6  200.28   14.60
  -2  12   6  183.38   18.30
   2 -12  -6  196.78   18.40
   2 -12  -6  197.68   13.60
   2 -12  -6  182.68   26.20
  -2 -12   6  189.58   16.40
  -4  12   8    2.10    8.90
   4  12  -8   17.10   12.10
   4  12  -8    3.10    5.50
  -4  12   8    0.70    5.90
   4 -12  -8   15.40    5.80
  -4 -12   8   11.30    5.90
   4 -12  -8   -2.80    5.80
   6  12 -10   95.89    9.50
  -6  12  10   92.59   15.90
   6  12 -10   65.99   19.60
   6  12 -10  115.49   12.90
   6 -12 -10  112.69   15.00
   6 -12 -10  119.79   17.20
   8  12 -12   -0.10    5.10
   8  12 -12    3.10   15.50
   8  12 -12    6.80    5.80
   8 -12 -12   -0.20    8.70
   8 -12 -12    4.70    8.10
  -8 -12  12    6.70    5.70
  -8 -12  12    4.10    7.00
  10  12 -14  141.29   37.30
  10  12 -14  193.78   19.10
  10 -12 -14  205.48   24.20
  10 -12 -14  196.48   23.60
 -10 -12  14  229.28   23.10
  11  13  -7   71.69   28.80
  11  13  -7   77.29   12.40
  11 -13  -7   96.79   19.00
  11 -13  -7  104.99   20.10
   9  13  -5   73.59   24.20
   9  13  -5   81.39   10.50
   9  13  -5   98.19   10.70
   9  13  -5   97.69   12.80
  -9 -13   5  123.19   16.70
   9 -13  -5   81.79   15.50
   9 -13  -5   81.39   16.40
   7  13  -3  172.98    9.10
   7  13  -3  142.79    9.20
   7  13  -3  150.08   16.40
   7  13  -3  175.58   31.70
   7 -13  -3  164.08   20.70
  -7 -13   3  155.58   17.90
   7 -13  -3  146.99   18.30
  -5  13   1   55.59   10.90
   5  13  -1   83.09   18.60
   5  13  -1   57.19   11.00
   5 -13  -1   35.10   10.90
   5 -13  -1   60.19   10.60
  -5 -13   1   49.80    9.80
   3  13   1    7.30    8.00
  -3  13  -1   11.60   10.50
   3  13   1    8.90   11.40
   3 -13   1   -4.10   10.40
   3 -13   1    4.30    6.00
   3 -13   1    7.20    4.50
   3 -13   1   14.40    4.80
  -3 -13  -1   11.70    7.10
  -1  13  -3   11.30    9.20
   1  13   3   12.20    8.30
   1  13   3   17.20   10.90
  -1  13  -3    6.10    7.30
   1 -13   3   12.30    3.50
   1 -13   3   11.50    7.40
  -1 -13  -3   18.10   11.40
  -1 -13  -3   11.60    6.80
   1 -13   3   17.70    4.10
   1 -13   3   22.80   11.00
  -1  13   5   -2.70    3.20
   1  13  -5   15.50   10.20
  -1  13   5    2.30    9.50
  -1  13   5    1.90    7.40
   1  13  -5   -4.10    7.30
   1 -13  -5  -13.60    9.30
  -1 -13   5   -9.60    8.50
   1 -13  -5    6.70    6.00
  -1 -13   5   -7.00    4.30
   1 -13  -5    0.50    3.40
  -3  13   7 1231.38   56.39
   3  13  -7 1235.78   72.39
   3  13  -7 1232.38   58.89
  -3 -13   7 1275.47   58.99
   3 -13  -7 1164.08   54.99
   3 -13  -7 1221.98   61.69
   5  13  -9   17.60    8.20
   5  13  -9    2.70   14.30
   5 -13  -9   34.00   10.50
   5 -13  -9   19.00    8.30
  -5 -13   9   14.80    6.40
   7  13 -11   53.89    9.00
   7  13 -11   49.20    7.00
   7  13 -11   48.70    6.00
   7  13 -11   20.60   19.70
   7 -13 -11   58.89   12.70
   7 -13 -11   29.90   10.30
  -7 -13  11   65.89   18.80
   9  13 -13    9.30    6.20
   9  13 -13   -4.20   19.80
   9  13 -13   -0.50    4.90
   9  13 -13   10.50    7.00
   9 -13 -13   17.50   11.00
   9 -13 -13    5.80   10.40
  10  14  -6  173.48   13.90
  10  14  -6  123.39   20.00
  10  14  -6   98.49   31.50
  10 -14  -6  141.49   21.30
  10 -14  -6  131.99   20.50
   8  14  -4  103.29   15.00
   8  14  -4   68.59   21.10
   8 -14  -4   99.99   16.50
  -8 -14   4  128.89   18.00
   8 -14  -4  101.59   18.40
  -6  14   2   -2.00    9.20
   6  14  -2   17.00   16.60
   6  14  -2  -12.70    6.90
  -6 -14   2    5.20    7.20
   6 -14  -2    3.10    7.20
   6 -14  -2   -1.80    7.40
   4  14   0    8.00    8.40
  -4 -14   0   11.40    7.60
   4 -14   0   26.20    7.40
   4 -14   0   19.60    6.70
   2  14   2   -9.40    9.20
   2  14   2   -3.50    6.00
  -2  14  -2    2.90    8.80
   2 -14   2    7.00    3.90
   2 -14   2    5.40    4.40
   2 -14   2   -4.70    5.80
   2 -14   2    6.40   13.20
  -2 -14  -2   -4.40    5.30
   0  14  -4  122.79   17.40
   0  14  -4   78.59   18.00
   0  14   4   88.09   18.20
   0 -14  -4   81.89    5.40
   0 -14  -4   93.39    6.30
   0 -14   4  115.09   22.00
   0 -14  -4   75.59   13.90
   0 -14   4   76.19   13.20
  -2  14   6  407.06   35.60
   2  14  -6  431.26   39.20
   2  14  -6  396.86   27.80
  -2  14   6  443.96   24.20
   2 -14  -6  492.15   31.50
   2 -14  -6  398.86   22.80
  -2 -14   6  394.16   28.00
  -4  14   8  393.06   26.90
   4  14  -8  433.56   30.90
   4  14  -8  389.66   40.40
  -4 -14   8  417.66   27.60
   4 -14  -8  457.95   31.60
   4 -14  -8  438.66   26.20
   6  14 -10   45.60    9.90
   6  14 -10   31.10   18.60
   6 -14 -10   29.50   12.10
  -6 -14  10   54.79   10.90
   6 -14 -10   30.40   10.10
   8  14 -12  121.99   14.10
   8  14 -12  106.19   32.40
   8  14 -12  108.09    9.00
   8  14 -12   82.29    9.40
   8 -14 -12   61.29   15.20
  -8 -14  12  131.59   17.30
   8 -14 -12  105.29   17.90
  10  14 -14   24.80   28.50
  10  14 -14   73.49   12.40
  10 -14 -14   43.10   15.10
  10 -14 -14   64.39   16.40
   9  15  -5  429.66   29.20
   9  15  -5  395.26   77.79
   9 -15  -5  380.76   32.50
   9 -15  -5  459.05   37.10
  -9 -15   5  477.45   33.40
   7  15  -3   21.70   18.00
   7  15  -3   40.50   11.60
   7 -15  -3   51.59   12.10
  -7 -15   3   70.59   14.20
   7 -15  -3   49.99   13.60
   5  15  -1   42.90   19.40
   5  15  -1   21.00   10.30
   5 -15  -1   29.00    9.40
   5 -15  -1   31.20    9.00
   5 -15  -1   19.40   10.00
  -5 -15   1   32.50   10.30
   3  15   1   67.79   21.00
  -3  15  -1   42.30   15.70
  -3 -15  -1   34.70   10.20
   3 -15   1   35.30    7.90
   3 -15   1   30.20   10.80
   3 -15   1   34.50    7.00
  -1  15  -3   37.20   15.40
   1  15   3   32.20   14.60
   1 -15   3   12.90    3.30
   1 -15   3   15.20    3.40
  -1 -15  -3   29.40   10.40
   1 -15   3   11.70    7.70
  -1  15   5  311.67   17.60
   1  15  -5  247.28   32.50
  -1 -15   5  288.37   24.40
   1 -15  -5  399.46   36.80
   1 -15  -5  358.56   18.20
  -3  15   7  203.78   17.10
   3  15  -7  170.58   19.40
   3  15  -7  229.58   53.59
   3 -15  -7  189.38   15.90
   3 -15  -7  205.68   23.90
  -3 -15   7  192.68   19.10
   5  15  -9   84.89   24.40
   5  15  -9  115.99   16.40
  -5  15   9  118.29   16.80
  -5 -15   9  114.99   15.70
   5 -15  -9  133.89   17.10
   5 -15  -9   87.89   16.90
   7  15 -11  130.49   15.70
   7  15 -11   96.29   27.50
   7 -15 -11  160.68   22.00
   7 -15 -11  172.98   20.90
  -7 -15  11  108.19   15.30
   9  15 -13    0.70   24.20
  -9 -15  13   27.40    9.70
   9 -15 -13   13.70   12.50
   9 -15 -13   29.90   12.70
   8  16  -4  130.29   35.70
   8  16  -4  111.69   16.50
   8 -16  -4  117.29   21.20
   8 -16  -4  112.89   18.50
  -8 -16   4  138.79   19.40
   6  16  -2  255.77   41.10
  -6 -16   2  248.58   25.10
   6 -16  -2  281.97   26.70
   6 -16  -2  280.77   22.60
   6 -16  -2  245.58   22.90
   4  16   0   11.90   13.30
   4 -16   0   13.80    9.30
  -4 -16   0   15.10    9.20
   4 -16   0   20.40    7.40
   4 -16   0   16.70    7.40
   2  16   2   22.60   13.00
  -2  16  -2   24.60   14.50
   2 -16   2   35.10    6.00
   2 -16   2   26.10    5.70
   2 -16   2   57.49   13.60
   0  16   4   12.70   10.00
   0  16  -4  -15.30   11.00
   0 -16   4    4.50    8.70
   0 -16  -4   -1.00    7.80
   2  16  -6   25.30   15.60
  -2  16   6   31.10   15.80
  -2  16   6   53.19    8.40
  -2 -16   6   26.90    9.90
   2 -16  -6   30.80    7.60
   2 -16  -6   50.19   13.40
  -4  16   8  154.58   17.50
   4  16  -8  161.68   31.80
  -4 -16   8  151.88   18.40
   4 -16  -8  164.88   15.90
   4 -16  -8  123.19   18.80
   6  16 -10  159.68   33.50
   6  16 -10  125.79   18.70
   6 -16 -10  209.18   20.30
  -6 -16  10  143.19   17.90
   6 -16 -10  184.58   25.00
   8 -16 -12    2.10   12.10
  -8 -16  12   34.10   11.20
   8 -16 -12   31.00   15.20
   7  17  -3   -3.90   20.30
  -7 -17   3   16.00   11.70
   7 -17  -3    3.90   12.20
   7 -17  -3    4.70   12.90
   5  17  -1   66.39   21.50
   5 -17  -1   29.70   12.50
   5 -17  -1   45.30   10.20
  -5 -17   1   50.49   12.00
   5 -17  -1   36.30   10.70
  -3  17  -1    9.90   14.80
   3  17   1   18.50   15.50
   3 -17   1   12.50    6.30
   3 -17   1    3.50    9.50
  -3 -17  -1   11.80    8.40
   3 -17   1    7.50    6.20
  -1  17  -3   20.90   14.10
   1  17   3    0.30   14.60
   1 -17   3   36.80   10.70
  -1 -17  -3    2.30    9.10
   1  17  -5   36.60   16.20
  -1  17   5   13.10   15.70
   1 -17  -5   34.00    4.40
  -1 -17   5   23.50   10.50
   1 -17  -5   29.00    5.00
   1 -17  -5   28.60   11.90
   3  17  -7   54.39   18.50
   3 -17  -7   28.70   11.20
   3 -17  -7   36.80    9.00
  -3 -17   7   62.79   16.30
   5  17  -9   35.10   23.10
  -5  17   9   28.50   14.20
  -5 -17   9   41.40   12.20
   5 -17  -9   40.80   10.90
   5 -17  -9   30.60   13.50
   7  17 -11   35.20   28.20
   7  17 -11   12.30   15.10
   7 -17 -11    4.50   10.60
   7 -17 -11   20.50   11.80
  -7 -17  11    6.90   10.60
   6  18  -2  189.48   50.99
   6 -18  -2   92.99   15.80
  -6 -18   2  109.09   19.50
   6 -18  -2   82.09   20.90
   4  18   0   36.90   20.30
   4 -18   0   54.59   15.20
  -4 -18   0   43.40   13.00
   4 -18   0   55.19   10.70
   4 -18   0   41.40    9.00
   2  18   2  -15.50   13.50
  -2  18  -2   -0.30   13.90
   2 -18   2    8.90    4.40
   2 -18   2   14.30    4.00
  -2 -18  -2    3.80   10.40
   2 -18   2   15.10   10.40
   0  18   4   74.29   22.10
   0  18  -4   98.29   26.30
   0 -18   4   89.99   17.90
   0 -18  -4  101.69   19.60
   2  18  -6   34.50   17.50
  -2  18   6   18.80   17.00
   2 -18  -6   10.80    6.90
   2 -18  -6   10.90    5.30
  -2 -18   6    4.80    8.70
   2 -18  -6   24.10   11.00
  -4  18   8   17.70   11.00
   4  18  -8   10.80   20.20
  -4 -18   8   13.20   10.70
   4 -18  -8    4.60   10.10
   4 -18  -8    6.90    8.50
   6  18 -10   -8.40   33.10
   6 -18 -10   10.60   11.70
   6 -18 -10    0.40   11.60
   5  19  -1   66.79   25.20
   5 -19  -1   31.60   14.80
  -5 -19   1   24.90   13.70
   5 -19  -1   24.50   13.00
   5 -19  -1    1.70    9.30
   3  19   1   26.70   19.80
  -3 -19  -1   36.40   12.50
   3 -19   1   25.00    7.00
   3 -19   1   24.60   13.50
   1  19   3   71.29   20.30
  -1  19  -3   45.70   20.30
   1 -19   3   74.59   17.40
  -1 -19  -3   61.69   16.00
  -1  19   5   24.00   20.00
   1  19  -5   68.29   20.70
   1 -19  -5   16.80   12.00
  -1 -19   5   13.20   11.30
   3  19  -7  -19.10   16.80
   3 -19  -7    3.40   10.90
  -3 -19   7    5.30   11.10
   3 -19  -7   -7.80    7.00
   5  19  -9   33.20   27.10
  -5 -19   9   11.50   11.40
   5 -19  -9   13.60   10.80
   5 -19  -9   -1.10   11.30
   4  20   0   -4.10   21.50
  -4 -20   0   22.50   14.00
   4 -20   0   15.90   10.10
   4 -20   0   -1.70   11.50
  -2  20  -2   56.99   23.00
  -2 -20  -2   50.79   16.80
   2 -20   2   76.39   26.10
   0  20   4   -3.40   19.20
   0  20  -4   10.30   20.10
   0 -20   4   26.40   13.70
   0 -20  -4  -13.60   10.70
  -2  20   6   38.50   22.80
   2  20  -6  -12.30   22.20
  -2 -20   6   63.59   15.10
   2 -20  -6   19.50   13.10
   4  20  -8   -3.00   24.50
   4 -20  -8   -7.90    9.80
  -4 -20   8   -0.50   11.80
   4 -20  -8    8.40   12.90
  -1  21  -3   59.19   25.20
   1  21   3    6.60   21.50
  -1 -21  -3   57.39   18.30
   1 -21   3   12.00   13.10
  12   0  -7   -4.10    9.40
  12   0  -7  -10.40    5.10
  12   0  -7    4.40    4.10
  10   0  -5    3.60    4.10
  10   0  -5   -0.60    6.10
  10   0  -5    5.00    8.10
   8   0  -3   11.70    4.30
  -8   0   3    7.40    7.00
  -8   0   3   20.90    7.10
   8   0  -3   12.30    6.00
  -6   0   1    2.50    4.00
  -6   0   1    1.20    3.30
   6   0  -1    3.50    2.90
   4   0   1   -1.70    2.20
   4   0   1    2.10    2.40
  -4   0  -1    3.80    2.80
  -4   0  -1   -1.60    2.20
   2   0   3    0.50    1.70
   2   0   3   -2.10    1.30
  -2   0  -3    2.90    3.10
  -2   0  -3   -1.00    1.10
   2   0   3   -2.00    1.10
   0   0   5    3.90    1.90
   0   0  -5    1.90    1.60
   0   0   5    2.10    2.20
   0   0   5    1.70    1.80
  -2   0   7    0.50    1.30
   2   0  -7    3.50    2.20
  -2   0   7    0.40    1.90
   2   0  -7    1.70    1.50
  -4   0   9    3.40    1.40
  -4   0   9    0.50    2.90
   4   0  -9    3.40    1.20
   4   0  -9    8.10    3.50
   6   0 -11    1.90    1.90
  -6   0  11    2.00    1.80
   6   0 -11    2.40    4.40
  -6   0  11    7.50    4.70
   8   0 -13    7.30    2.00
   8   0 -13    9.70    6.30
  -8   0  13    9.70    2.60
  -8   0  13    4.40    6.80
  10   0 -15    6.30    8.00
  12   0 -17   15.60   10.10
  13   1  -8  215.28   26.70
  13  -1  -8  203.98   14.60
  13  -1  -8  297.37   28.70
  11   1  -6   52.59   13.20
  11   1  -6   59.39    8.70
 -11   1   6   90.69   16.50
  11   1  -6   84.49    8.40
  11  -1  -6   52.29   12.00
  11  -1  -6   93.09   10.50
   9   1  -4  476.15   26.40
  -9   1   4  460.25   31.10
   9   1  -4  401.46   22.20
  -9   1   4  490.05   31.40
   9   1  -4  432.96   29.20
   9  -1  -4  457.35   30.20
  -9  -1   4  430.56   29.90
   9  -1  -4  458.75   24.20
   7   1  -2   39.20    7.50
   7   1  -2   39.00    5.90
  -7   1   2   35.60    8.00
  -7   1   2   25.80    7.60
   7   1  -2   35.80    8.00
  -7  -1   2   21.70    6.90
   7  -1  -2   31.50    6.10
   7  -1  -2   34.40    8.00
  -5   1   0  883.01   39.10
   5   1   0  777.32   37.20
   5   1   0  833.52   39.20
  -5   1   0  843.72   40.00
  -5  -1   0  807.52   40.50
   5  -1   0  797.42   39.50
   5  -1   0  882.91   37.70
  -5  -1   0  858.61   39.90
   3   1   2   18.40    4.40
  -3   1  -2   25.10    4.60
  -3   1  -2   22.20    4.20
   3   1   2   29.80    4.60
   3   1   2   31.70    5.80
   3   1   2   26.40    3.80
  -3  -1  -2   23.50    4.40
   3  -1   2   28.60    4.50
   3  -1   2   23.80    4.70
   1   1   4 1375.76   56.99
  -1   1  -4 1303.67   55.39
  -1   1  -4 1382.56   56.99
   1   1   4 1417.46   55.59
   1   1   4 1396.06   56.09
   1  -1   4 1386.26   57.09
   1  -1   4 1412.56   55.59
  -1  -1  -4 1403.76   55.59
  -1  -1  -4 1382.56   57.09
  -1  -1  -4 1406.66   56.39
  -1   1   6  267.37   12.70
   1   1  -6  213.08   11.90
   1   1  -6  240.38   13.10
  -1  -1   6  258.77   12.70
   1  -1  -6  224.58   11.70
  -1  -1   6  237.18   12.10
   1  -1  -6  238.78   12.30
  -3   1   8  311.07   17.40
  -3   1   8  314.47   15.00
   3   1  -8  350.16   17.40
   3  -1  -8  344.97   15.40
  -3  -1   8  306.17   14.60
  -3  -1   8  318.87   13.40
   3  -1  -8  306.27   17.20
  -3  -1   8  320.87   17.20
  -5   1  10   64.69    9.30
   5   1 -10   67.39    8.80
  -5   1  10   80.29    6.10
  -5  -1  10   82.49    9.80
   5  -1 -10   69.79    5.90
  -7   1  12    9.30    5.70
  -7   1  12    6.90    3.20
   7   1 -12    5.60    5.90
  -7  -1  12   -0.30    5.50
   7  -1 -12   11.60    6.20
   7  -1 -12    7.80    2.50
  -9   1  14    8.20    4.70
   9   1 -14    6.70    7.40
   9  -1 -14   11.10    3.40
  -9  -1  14   27.00   16.60
   9  -1 -14   10.40    6.60
  11   1 -16  229.38   23.70
  11  -1 -16  322.97   27.50
  13   1 -18   20.10   13.40
  14   2  -9  143.09   23.50
  14  -2  -9  106.69   11.10
  14  -2  -9  160.98   24.80
  12   2  -7   99.99   16.80
  12   2  -7   94.09    6.20
 -12   2   7   89.99   16.20
  12   2  -7  104.79    6.10
  12  -2  -7   87.59   17.00
  12  -2  -7  114.59   14.60
 -10   2   5 1327.57   61.79
  10   2  -5 1169.48   61.79
  10   2  -5 1264.07   52.39
  10   2  -5 1182.88   52.99
  10  -2  -5 1293.67   55.79
  10  -2  -5 1244.38   63.59
  -8   2   3  218.38   19.70
   8   2  -3  175.08   12.00
  -8   2   3  189.78   16.30
   8   2  -3  198.28   17.10
   8   2  -3  193.98   14.10
  -8  -2   3  178.18   16.90
   8  -2  -3  206.78   17.90
   8  -2  -3  173.88   13.60
   6   2  -1   51.89    7.90
  -6   2   1   53.29    8.10
   6   2  -1   70.49    7.80
   6   2  -1   53.49    8.40
  -6   2   1   49.20    8.70
   6  -2  -1   60.99    9.60
  -6  -2   1   75.79   10.40
   6  -2  -1   50.99    7.50
   4   2   1   19.90    4.50
   4   2   1   18.00    4.30
  -4   2  -1   19.70    5.00
   4   2   1    6.70    3.70
  -4   2  -1   11.30    3.70
  -4  -2  -1   27.60    5.30
   4  -2   1   18.80    4.60
   4  -2   1   16.80    4.40
   2   2   3    3.90    2.30
   2   2   3    0.00    1.40
   2   2   3    1.90    2.60
  -2   2  -3    1.50    1.90
  -2  -2  -3    1.40    2.10
  -2  -2  -3    1.80    1.20
   2  -2   3   -0.90    1.20
   2  -2   3   -0.40    1.60
   2  -2   3    1.90    2.20
   0   2  -5   91.99    6.40
   0   2   5   89.99    6.20
   0   2  -5   86.49    6.40
   0   2   5  103.49    7.20
   0   2  -5   98.49    6.30
   0  -2  -5   88.29    6.30
   0  -2   5   93.49    6.20
   0  -2   5   97.79    6.60
   0  -2  -5   91.89    7.20
   0  -2  -5   90.39    6.50
   2   2  -7   73.99    5.40
  -2   2   7   63.79    5.60
   2   2  -7   60.89    5.60
  -2   2   7   77.59    6.70
  -2  -2   7   76.29    6.00
  -2  -2   7   63.79    4.40
   2  -2  -7   66.59    5.50
   2  -2  -7   62.19    6.10
  -4   2   9 1787.22   74.59
  -4   2   9 1750.42   70.79
   4   2  -9 1751.12   72.79
   4  -2  -9 1713.53   73.69
   4  -2  -9 1708.73   70.59
  -4  -2   9 1772.22   73.19
  -6   2  11  222.58   12.80
  -6   2  11  211.88   17.60
   6   2 -11  242.88   16.40
  -6  -2  11  218.98   16.50
   6  -2 -11  211.98   16.50
   6  -2 -11  174.68   12.00
  -8   2  13   17.30    4.90
  -8   2  13    4.00    7.10
   8   2 -13   12.30    7.10
   8  -2 -13   20.30    7.80
   8  -2 -13   12.90    4.20
  10   2 -15  111.19   16.40
 -10   2  15  113.39   11.80
  10  -2 -15  147.09   19.30
  10  -2 -15  101.69    9.30
  12   2 -17   80.39   16.90
  12  -2 -17  112.19   19.70
 -13   3   8   20.10   15.90
  13   3  -8   18.60   12.40
  13  -3  -8   36.60   12.10
  13  -3  -8    1.40    6.50
  11   3  -6   14.30   10.30
  11   3  -6    5.80    2.70
  11   3  -6    7.90    2.90
 -11   3   6    5.20    9.30
  11  -3  -6    8.50    7.80
  11  -3  -6   -0.10    5.70
   9   3  -4  154.58   17.50
   9   3  -4  128.09    9.50
  -9   3   4  136.69   18.80
  -9   3   4  152.48   16.80
   9   3  -4  119.89    9.50
   9  -3  -4  137.99   19.50
  -9  -3   4  147.89   20.50
   9  -3  -4  113.89   15.80
  -7   3   2  177.08   17.10
  -7   3   2  187.88   15.60
   7   3  -2  201.78   16.30
   7   3  -2  216.28   13.40
   7   3  -2  222.88   14.00
   7  -3  -2  212.78   17.90
   7  -3  -2  214.08   15.10
  -7  -3   2  255.77   17.90
   5   3   0  108.39    9.70
  -5   3   0  105.79    9.70
   5   3   0   88.29    7.90
  -5   3   0   86.89   10.30
   5   3   0   91.09   11.40
   5  -3   0   86.99    8.90
  -5  -3   0   97.39    9.20
   5  -3   0  110.29   12.30
   3   3   2   90.99    6.50
  -3   3  -2   88.39    8.00
  -3   3  -2   78.59    7.90
   3   3   2   95.39    7.40
   3   3   2  100.29    7.40
  -3  -3  -2   99.69    8.30
   3  -3   2   78.79    7.90
   3  -3   2   89.09    7.80
  -1   3  -4  131.39    8.30
   1   3   4  124.49    8.40
  -1   3  -4  127.79    8.70
  -1   3  -4  126.89    7.50
   1   3   4  107.59    7.30
   1   3   4  111.69    9.60
   1  -3   4  129.39    7.50
   1  -3   4  125.29    8.20
   1  -3   4  141.99    8.90
  -1  -3  -4  133.39    7.50
  -1  -3  -4  138.89   10.80
  -1  -3  -4  109.79    8.10
  -1   3   6  253.67   13.80
   1   3  -6  270.87   13.70
   1   3  -6  287.07   13.60
  -1   3   6  284.77   14.60
  -1  -3   6  269.97   13.40
  -1  -3   6  270.17   13.30
   1  -3  -6  268.77   14.30
   1  -3  -6  268.17   13.90
   1  -3  -6  274.27   16.30
  -3   3   8  603.14   26.90
   3   3  -8  608.34   26.90
  -3   3   8  557.04   28.00
   3   3  -8  552.94   24.30
  -3  -3   8  579.44   26.60
   3  -3  -8  587.84   27.80
   3  -3  -8  597.54   26.80
  -3  -3   8  542.85   23.40
  -5   3  10    2.40    2.50
  -5   3  10    0.70    3.70
   5   3 -10    3.20    3.00
   5  -3 -10    0.00    2.50
  -5  -3  10   -2.50    3.00
   5  -3 -10    6.30    4.40
   7   3 -12 1088.49   50.99
  -7   3  12 1060.09   47.30
  -7   3  12 1012.70   53.59
   7  -3 -12 1165.58   53.39
   7  -3 -12 1047.40   46.90
  -7  -3  12 1067.29   51.89
  -9   3  14  101.29   18.20
   9   3 -14  137.59   17.40
  -9  -3  14  102.99   15.90
   9  -3 -14   89.59   14.10
   9  -3 -14  105.19   10.00
  11   3 -16   11.30    8.30
 -11   3  16    0.30    7.30
  11  -3 -16    4.40    4.70
  11  -3 -16    0.80    8.60
  13   3 -18   44.60   13.60
  13  -3 -18  106.99   20.10
  14   4  -9   22.80   12.90
  14  -4  -9   28.70   15.10
  14  -4  -9   23.70    8.50
  12   4  -7    8.40    9.60
 -12   4   7   -7.30   11.80
  12  -4  -7   27.80   12.10
  12  -4  -7   17.40    7.40
 -10   4   5   89.49   15.40
  10   4  -5   88.29    7.10
  10   4  -5   86.59   13.80
  10   4  -5   93.99    7.30
  10  -4  -5   82.69   11.20
 -10  -4   5   90.69   15.90
  -8   4   3  175.08   20.00
  -8   4   3  145.79   14.30
   8   4  -3  153.18   14.80
   8   4  -3  123.29   10.20
   8   4  -3  129.99    9.40
  -8  -4   3  111.79   14.10
   8  -4  -3  144.29   13.00
   8  -4  -3  123.99   15.60
   6   4  -1 3578.24  143.59
  -6   4   1 3440.46  144.29
  -6   4   1 3498.35  146.19
   6   4  -1 3518.05  145.19
   6   4  -1 3469.35  140.29
  -6  -4   1 3571.74  143.89
   6  -4  -1 3652.63  146.39
   6  -4  -1 3687.73  143.89
  -4   4  -1   43.80    7.30
   4   4   1   27.50    4.60
   4   4   1   23.40    4.70
  -4   4  -1   22.10    5.50
   4   4   1   20.50    4.00
   4  -4   1   20.20    5.20
   4  -4   1   23.20    5.70
  -4  -4  -1   17.90    4.70
   2   4   3  373.36   18.30
  -2   4  -3  342.77   18.80
   2   4   3  378.36   22.30
   2   4   3  366.56   16.40
   2  -4   3  341.97   17.20
   2  -4   3  330.17   17.80
  -2  -4  -3  372.16   18.40
   2  -4   3  329.57   18.50
  -2  -4  -3  355.36   16.10
   2  -4   3  366.06   19.40
  -2  -4  -3  351.06   22.20
   0   4  -5  100.79    9.20
   0   4   5  103.99    7.00
   0   4   5  110.09   10.30
   0   4  -5  128.29    7.00
   0   4  -5  106.39    8.10
   0   4   5  133.39    8.90
   0  -4   5  105.59    6.90
   0  -4   5  106.89    9.20
   0  -4   5  110.19    8.10
   0  -4  -5  123.29    7.50
   0  -4  -5  109.39   10.40
   0  -4  -5  119.09    8.60
   2   4  -7   51.89    5.00
  -2   4   7   47.50    5.90
   2   4  -7   63.89    5.50
  -2   4   7   53.69    6.30
   2  -4  -7   64.89    7.20
  -2  -4   7   45.70    4.50
   2  -4  -7   50.39    5.90
   2  -4  -7   63.39    9.20
  -2  -4   7   55.89    5.00
  -4   4   9   39.10    7.30
   4   4  -9   29.20    5.30
  -4   4   9   34.20    5.40
   4   4  -9   33.80    3.30
  -4  -4   9   33.60    2.90
  -4  -4   9   39.60    6.10
   4  -4  -9   26.60    6.00
   4  -4  -9   19.70    4.70
   6   4 -11  130.39   12.20
  -6   4  11  112.29   14.50
  -6   4  11  129.39   10.80
  -6  -4  11  149.19   12.90
   6  -4 -11  134.59   11.10
   6  -4 -11  129.89   14.60
   8   4 -13 1149.98   53.89
  -8   4  13 1030.20   49.90
  -8   4  13 1120.99   57.29
   8  -4 -13 1166.68   56.49
   8  -4 -13 1066.79   49.50
  -8  -4  13 1128.79   54.89
  10   4 -15   31.40   10.40
 -10   4  15   46.20    9.60
  10  -4 -15   49.40    8.40
  10  -4 -15   62.19   14.20
  12   4 -17   43.10   12.90
 -12   4  17   56.09   13.30
  12  -4 -17   56.09   14.60
  12  -4 -17   52.99    8.50
  13   5  -8   32.00   11.20
 -13   5   8   33.00   19.20
  13  -5  -8   32.50   15.00
  13  -5  -8   29.90    9.00
  11   5  -6   13.10    8.20
 -11   5   6   36.30   12.20
  11  -5  -6    9.90   10.30
  11  -5  -6   25.80    8.40
   9   5  -4  117.79    8.60
   9   5  -4  130.99   15.80
   9   5  -4  122.69    9.70
  -9   5   4  129.09   16.00
  -9  -5   4  115.59   14.90
   9  -5  -4  129.49   14.70
   9  -5  -4  148.09   19.40
   7   5  -2  913.21   42.50
   7   5  -2  854.41   41.50
  -7   5   2  850.81   44.60
  -7   5   2  787.92   42.40
   7   5  -2  863.11   37.70
   7  -5  -2  810.12   41.60
   7  -5  -2  862.91   44.40
  -7  -5   2  876.41   42.20
   5   5   0   88.09    8.10
   5   5   0  100.39    9.20
  -5   5   0  107.79   10.60
  -5   5   0  110.59   12.20
   5   5   0   85.19    7.80
  -5  -5   0   90.89    9.40
   5  -5   0   99.09   11.50
   3   5   2   29.60    4.30
   3   5   2   12.10    6.60
   3   5   2   30.40    4.10
   3   5   2   31.60    5.40
  -3   5  -2   25.40    5.00
  -3  -5  -2   25.40    4.70
   3  -5   2   34.60    6.30
   3  -5   2   28.20    5.60
   3  -5   2   23.80    6.00
   1   5   4   24.50    3.50
  -1   5  -4   27.80    5.80
   1   5   4   18.80    4.10
   1   5   4   34.00    7.10
  -1   5  -4   14.60    3.80
  -1  -5  -4   33.50    7.40
   1  -5   4   23.10    3.50
  -1  -5  -4   24.50    3.40
   1  -5   4   19.10    3.50
  -1  -5  -4   22.30    4.30
   1  -5   4   19.00    4.70
   1  -5   4   13.70    4.30
   1   5  -6  210.88   10.90
  -1   5   6  168.48   14.30
   1   5  -6  207.78   12.10
   1   5  -6  212.28   16.20
  -1   5   6  213.28   11.80
  -1   5   6  168.38   12.40
  -1  -5   6  229.08   12.40
   1  -5  -6  189.28   12.60
  -1  -5   6  196.58   10.30
   1  -5  -6  192.48   15.30
   1  -5  -6  214.48   11.70
   3   5  -8    0.90    1.90
   3   5  -8    4.30    2.70
  -3   5   8    4.90    3.90
  -3   5   8    6.10    3.60
  -3  -5   8    6.30    2.70
   3  -5  -8    0.40    4.20
   3  -5  -8    7.80    3.80
   3  -5  -8    8.50    4.00
  -3  -5   8    3.60    2.00
  -5   5  10  205.18   14.60
   5   5 -10  205.58   14.00
   5   5 -10  199.18    9.60
  -5   5  10  212.08   16.40
   5  -5 -10  222.48   14.70
  -5  -5  10  196.18   13.80
   5  -5 -10  182.98   15.10
  -5  -5  10  205.48    9.20
   7   5 -12  978.00   47.50
  -7   5  12  997.50   46.90
  -7   5  12  997.10   51.59
   7  -5 -12  971.10   49.99
   7  -5 -12 1021.20   49.40
  -7  -5  12 1019.60   48.80
   9   5 -14  112.39   14.60
  -9   5  14  115.19   13.80
  -9  -5  14  104.19   15.10
   9  -5 -14  107.39   12.40
  11   5 -16   51.39   12.30
 -11   5  16   37.30   10.70
  11  -5 -16   42.00    8.50
  11  -5 -16   38.10   13.50
  13   5 -18    3.60   10.50
  13  -5 -18   20.70   13.10
  13  -5 -18    1.90    7.60
  12   6  -7   61.49   13.20
 -12   6   7   81.39   18.90
  12  -6  -7  105.49   20.80
  12  -6  -7   84.49   12.90
  10   6  -5   41.50   10.40
  10   6  -5   36.70    4.60
  10   6  -5   31.40    4.70
 -10   6   5   37.10   11.60
 -10  -6   5   22.50    9.20
  10  -6  -5   36.20    9.30
  10  -6  -5   56.19   13.40
   8   6  -3  299.77   16.70
  -8   6   3  318.27   24.60
  -8   6   3  308.57   23.00
   8   6  -3  310.97   20.30
   8   6  -3  320.67   21.50
   8  -6  -3  299.17   24.00
  -8  -6   3  326.07   21.80
   8  -6  -3  296.77   21.40
  -6   6   1  516.95   29.90
   6   6  -1  480.85   24.40
   6   6  -1  519.05   25.50
  -6   6   1  439.36   27.90
   6   6  -1  518.75   26.20
  -6  -6   1  479.15   27.10
   6  -6  -1  522.85   29.90
   6  -6  -1  502.95   28.30
  -4   6  -1  301.17   19.90
  -4   6  -1  342.07   20.40
   4   6   1  343.67   18.30
   4   6   1  335.67   17.00
   4   6   1  334.87   16.50
   4  -6   1  341.37   23.00
   4  -6   1  305.47   20.00
   4  -6   1  311.47   19.60
  -4  -6  -1  330.07   18.80
  -2   6  -3  274.37   18.20
  -2   6  -3  283.97   17.20
   2   6   3  259.37   13.50
   2   6   3  236.68   19.70
   2   6   3  297.17   16.60
  -2  -6  -3  239.38   20.20
   2  -6   3  269.67   17.30
   2  -6   3  298.87   18.80
   2  -6   3  277.17   15.30
  -2  -6  -3  274.87   16.50
  -2  -6  -3  287.37   12.80
   2  -6   3  288.07   14.80
   0   6  -5   44.00    4.10
   0   6   5   56.09   10.20
   0   6  -5   40.40    7.80
   0   6   5   44.60    4.90
   0   6  -5   52.19    7.10
   0   6   5   72.79    8.60
   0  -6  -5   61.99   10.30
   0  -6  -5   54.99    5.70
   0  -6   5   49.40    8.40
   0  -6   5   40.90    4.10
   0  -6   5   49.50    6.70
   0  -6  -5   48.20    7.20
  -2   6   7  121.59    9.70
   2   6  -7  118.69    8.90
   2   6  -7  138.99   17.50
   2   6  -7  116.09    8.10
  -2   6   7  123.69   10.20
  -2  -6   7  117.89    7.30
   2  -6  -7  127.19    9.40
   2  -6  -7  126.29   10.40
  -2  -6   7  114.39    8.90
   2  -6  -7  118.19   14.60
  -4   6   9  485.65   28.50
   4   6  -9  519.25   25.60
  -4   6   9  570.34   28.80
   4   6  -9  555.04   24.50
   4  -6  -9  522.35   28.30
   4  -6  -9  533.15   33.80
  -4  -6   9  539.45   25.90
  -4  -6   9  581.14   24.60
  -6   6  11  342.97   24.30
   6   6 -11  317.27   19.90
  -6   6  11  328.07   21.20
   6  -6 -11  357.46   21.40
  -6  -6  11  298.47   20.00
   6  -6 -11  342.67   23.00
  -8   6  13   12.50    6.20
   8   6 -13    4.10    5.50
   8  -6 -13   13.70    7.70
   8  -6 -13   11.70    5.70
  -8  -6  13    0.20    5.70
 -10   6  15    9.50    9.30
  10   6 -15    9.50    7.90
  10  -6 -15   15.80    6.70
  10  -6 -15    4.80    9.30
 -12   6  17    9.30   12.40
  12   6 -17   35.00   11.60
  12  -6 -17   22.20    8.60
  12  -6 -17   19.50   11.30
  13   7  -8    8.40   10.80
  13  -7  -8   28.70   15.20
  13  -7  -8   26.70   10.50
 -11   7   6  214.28   23.60
  11   7  -6  189.58   20.40
  11  -7  -6  166.98   21.80
  11  -7  -6  206.18   19.40
   9   7  -4   14.60    7.60
   9   7  -4   22.30    6.00
   9   7  -4   14.90    4.10
   9  -7  -4    8.90    7.80
  -9  -7   4   -4.80    6.70
   9  -7  -4   16.30    6.80
  -7   7   2   51.49   12.00
   7   7  -2   45.80    6.90
   7   7  -2   43.40    7.50
   7   7  -2   18.60   10.10
   7   7  -2   44.00    8.10
  -7   7   2   73.29   12.30
   7  -7  -2   42.00    9.00
  -7  -7   2   56.89    9.30
   7  -7  -2   67.79   11.90
   5   7   0  104.59    8.90
  -5   7   0   85.99   11.90
   5   7   0   92.39    9.20
  -5   7   0  112.29   13.20
   5   7   0  110.79   18.40
   5   7   0  107.69    8.20
   5  -7   0   62.49   11.80
   5  -7   0  111.19   13.50
  -5  -7   0  106.59   10.30
   5  -7   0   78.29   10.60
   3   7   2 5596.34  210.68
   3   7   2 4742.23  231.58
  -3   7  -2 5389.16  214.78
   3   7   2 5598.84  210.58
  -3   7  -2 5549.65  216.98
   3  -7   2 5579.64  214.68
  -3  -7  -2 5621.14  215.38
   3  -7   2 5619.44  220.08
   3  -7   2 5228.58  219.78
   1   7   4  226.88   19.00
   1   7   4  245.68   15.20
  -1   7  -4  212.48   17.00
  -1   7  -4  215.78   15.10
   1   7   4  200.28   10.70
  -1  -7  -4  216.48   11.20
   1  -7   4  238.58   12.50
   1  -7   4  220.48   15.10
  -1  -7  -4  242.38   19.60
   1  -7   4  204.38   16.70
   1  -7   4  213.48   11.80
  -1  -7  -4  229.38   15.20
  -1   7   6  632.34   34.30
   1   7  -6  592.44   25.30
  -1   7   6  568.64   30.30
   1   7  -6  578.04   29.20
   1   7  -6  637.84   35.60
  -1   7   6  618.74   27.80
  -1  -7   6  597.24   25.30
   1  -7  -6  609.54   30.60
   1  -7  -6  653.33   27.90
  -1  -7   6  586.64   29.30
   1  -7  -6  581.44   34.50
  -3   7   8  118.49   11.40
   3   7  -8  128.39    8.60
   3   7  -8  127.09    9.50
  -3   7   8  140.49   11.70
   3   7  -8  151.98   23.00
   3  -7  -8  114.69   10.20
   3  -7  -8  115.79   15.70
  -3  -7   8  132.09    8.40
  -3  -7   8  120.59    9.30
  -5   7  10  619.14   33.10
   5   7 -10  661.43   28.00
  -5   7  10  583.14   33.70
   5   7 -10  587.84   29.50
  -5  -7  10  657.63   30.40
  -5  -7  10  651.73   27.80
   5  -7 -10  575.24   32.50
   5  -7 -10  561.84   38.60
   5  -7 -10  589.54   32.60
  -7   7  12   69.19   12.50
  -7   7  12   86.59   11.80
   7   7 -12   80.49   10.80
  -7  -7  12   78.19   11.20
   7  -7 -12   69.99   12.90
   7  -7 -12   86.99   11.40
   9   7 -14   14.10    6.60
  -9   7  14   21.40    9.80
  -9  -7  14   -3.50    8.10
   9  -7 -14    4.80    7.00
   9  -7 -14   12.00    8.50
  11   7 -16   45.10   11.80
 -11   7  16   23.20   12.50
  11  -7 -16   31.80   13.40
  11  -7 -16   24.40    9.40
  12   8  -7    8.00   10.10
  12  -8  -7   28.50   12.50
  12  -8  -7   27.20   10.60
  10   8  -5  117.69    9.80
 -10   8   5   90.29   16.40
  10   8  -5  106.69    8.40
  10   8  -5  127.39   15.80
  10   8  -5  115.79   14.90
  10  -8  -5  101.09   14.80
  10  -8  -5   87.79   15.60
   8   8  -3   46.50    8.60
   8   8  -3   43.50    6.60
  -8   8   3   48.50   13.90
   8   8  -3   42.20   10.90
  -8   8   3   61.89   11.70
   8   8  -3   19.20   13.70
   8   8  -3   51.29    8.50
   8  -8  -3   44.50    9.30
   8  -8  -3   28.60   10.00
   8  -8  -3   34.00   14.60
  -6   8   1   39.40    9.20
   6   8  -1   17.10    4.90
   6   8  -1   16.20    5.00
   6   8  -1   17.70    9.70
   6   8  -1   27.30    5.50
  -6   8   1   26.60    7.90
  -6  -8   1   16.10    5.70
   6  -8  -1   15.30    6.40
   6  -8  -1   22.70    7.80
   6  -8  -1   29.50   10.30
   4   8   1 2175.98   84.59
  -4   8  -1 2080.09   89.89
   4   8   1 2144.19  100.39
   4   8   1 2141.19   84.59
   4   8   1 2175.78   88.79
  -4   8  -1 2082.19   91.69
   4  -8   1 2137.39   91.39
  -4  -8  -1 2050.29   89.19
   4  -8   1 2072.89   89.49
   4  -8   1 2188.28   95.69
   2   8   3  330.97   14.30
   2   8   3  286.37   24.50
  -2   8  -3  319.67   20.60
   2   8   3  318.77   19.60
  -2   8  -3  346.47   23.00
   2  -8   3  341.57   23.40
   2  -8   3  318.37   17.60
   2  -8   3  329.67   17.10
  -2  -8  -3  295.37   24.90
   2  -8   3  362.76   21.20
  -2  -8  -3  311.77   19.70
   0   8   5   18.80    3.50
   0   8  -5   23.00    6.20
   0   8   5   13.20    5.10
   0   8  -5   21.40    7.10
   0  -8   5   26.50    5.80
   0  -8  -5   31.00    4.40
   0  -8   5   16.50    6.90
   0  -8  -5   13.10    7.10
   0  -8   5   28.70    4.00
   0  -8  -5   27.70    7.10
   0  -8   5   29.20    3.70
   2   8  -7  268.97   13.10
  -2   8   7  290.17   22.10
  -2   8   7  282.37   16.80
  -2   8   7  257.87   18.50
   2   8  -7  272.77   23.60
   2  -8  -7  289.47   18.90
  -2  -8   7  291.77   17.20
  -2  -8   7  266.97   12.70
   2  -8  -7  279.77   22.50
   2  -8  -7  304.07   16.70
   4   8  -9  915.31   54.69
   4   8  -9  919.11   39.10
   4   8  -9  932.91   40.10
  -4   8   9  848.92   43.30
  -4   8   9  858.21   44.00
   4  -8  -9  870.81   42.50
   4  -8  -9  931.01   51.29
  -4  -8   9  891.81   39.80
   4  -8  -9  894.11   44.10
  -4  -8   9  860.51   38.60
   6   8 -11   18.60    5.70
   6   8 -11   33.60    4.90
   6   8 -11   39.40   16.00
  -6   8  11   16.50    7.80
  -6   8  11   26.70   13.10
  -6  -8  11   35.80    5.20
   6  -8 -11   33.20    8.50
   6  -8 -11   39.20   12.10
   6  -8 -11   28.90    8.40
  -6  -8  11   19.80    6.20
   8   8 -13  114.69   13.50
  -8   8  13   97.89   16.20
  -8  -8  13   71.89   11.90
   8  -8 -13   69.99   12.50
   8  -8 -13   78.69   12.50
  10   8 -15  360.36   26.60
 -10   8  15  411.66   29.80
  10  -8 -15  363.56   25.60
  10  -8 -15  377.46   30.50
 -10  -8  15  315.67   32.20
  12   8 -17    8.60   10.80
  12  -8 -17   16.90   13.30
  12  -8 -17   15.70    8.60
  13   9  -8   31.50   12.90
  13   9  -8  -22.10   21.40
  13  -9  -8   37.80   14.60
  13  -9  -8   17.00   11.10
  11   9  -6   -5.80   17.30
  11   9  -6   61.89   11.50
  11   9  -6   55.89   12.10
  11  -9  -6   45.50   13.30
   9   9  -4    1.50    5.80
   9   9  -4   13.60    7.80
   9   9  -4    2.10    5.70
   9   9  -4    7.80    4.40
   9   9  -4   -3.90   10.70
   9  -9  -4    7.50    9.50
   9  -9  -4    7.70    7.00
  -7   9   2   85.59   13.80
  -7   9   2   78.39   14.50
   7   9  -2  103.49   10.20
   7   9  -2   99.59    9.70
   7   9  -2   91.59   10.60
   7   9  -2  114.19   21.60
   7  -9  -2  101.99   14.90
   7  -9  -2   89.49   14.00
   7  -9  -2  113.39   20.00
  -7  -9   2  110.69   13.60
   5   9   0   54.69    6.30
   5   9   0   51.29    8.00
  -5   9   0   37.30    9.30
   5   9   0   52.09   15.10
   5   9   0   55.29    6.50
  -5   9   0   31.70    8.80
   5  -9   0   33.30    7.50
  -5  -9   0   56.29    8.40
   5  -9   0   50.79   10.00
   5  -9   0   41.80   10.60
   3   9   2   79.39    5.10
  -3   9  -2   77.39   11.80
   3   9   2  100.49   11.30
  -3   9  -2   85.29   10.40
   3   9   2  114.69   18.20
   3   9   2   89.99    5.30
  -3  -9  -2   87.39   16.00
   3  -9   2   98.59   13.00
   3  -9   2   85.19    8.20
   3  -9   2   84.69   13.70
   3  -9   2   77.99    9.20
   1   9   4 1500.35   70.09
  -1   9  -4 1644.94   71.29
  -1   9  -4 1662.23   76.29
   1   9   4 1589.34   77.29
   1   9   4 1565.44   63.59
   1  -9   4 1582.64   70.79
   1  -9   4 1575.04   65.39
  -1  -9  -4 1650.23   63.89
  -1  -9  -4 1773.72   79.39
   1  -9   4 1564.34   74.79
  -1  -9  -4 1682.03   71.29
   1  -9   4 1563.64   65.09
  -1   9   6 4642.14  203.18
  -1   9   6 4626.44  192.78
  -1   9   6 5126.59  198.78
   1   9  -6 5034.80  196.98
   1   9  -6 5432.56  207.18
  -1  -9   6 5182.98  189.28
  -1  -9   6 4677.73  203.18
   1  -9  -6 4721.23  192.68
   1  -9  -6 4627.14  204.18
  -1  -9   6 5157.58  196.98
  -1  -9   6 5130.69  189.48
   1  -9  -6 4818.72  197.78
  -3   9   8   56.99   10.10
   3   9  -8   51.89    7.70
   3   9  -8   52.59   14.50
   3   9  -8   44.70    5.30
  -3   9   8   45.10    8.30
   3  -9  -8   24.10   10.70
   3  -9  -8   54.89    7.60
   3  -9  -8   34.00    7.60
  -3  -9   8   53.59    8.00
  -3  -9   8   45.50    4.80
   5   9 -10   35.10    6.30
  -5   9  10   31.00    8.30
  -5   9  10   44.20   10.40
   5   9 -10   27.80    5.70
   5   9 -10   27.30   13.30
   5  -9 -10   56.09    9.90
  -5  -9  10   34.50    5.90
   5  -9 -10   32.50   11.70
   5  -9 -10   31.80    8.40
  -5  -9  10   37.40    6.40
   7   9 -12   13.70    5.50
  -7   9  12   15.90   10.00
  -7   9  12   11.90    7.50
   7   9 -12   11.40    4.00
   7   9 -12   14.90   13.30
   7  -9 -12   12.90    7.40
   7  -9 -12   16.10    7.50
  -7  -9  12   14.90    6.80
  -7  -9  12   13.90    4.20
  -9   9  14   78.59   15.60
   9   9 -14  100.69   13.70
  -9  -9  14   86.89   14.50
   9  -9 -14   99.69   14.10
   9  -9 -14   76.69   14.20
  11   9 -16   60.89   15.70
  11  -9 -16   56.09   12.10
  11  -9 -16   70.49   16.10
  12  10  -7    2.60   25.20
  12  10  -7    0.00    9.60
  12 -10  -7   18.10   11.10
  12 -10  -7   24.90   13.30
  10  10  -5   14.60    8.00
  10  10  -5   12.20    7.60
  10  10  -5   13.30    5.00
  10  10  -5   19.60   17.00
  10  10  -5   25.00    8.50
  10 -10  -5   12.20    9.40
  10 -10  -5   16.90    9.90
   8  10  -3   87.39   10.20
   8  10  -3   78.49   10.00
   8  10  -3   62.79   20.70
  -8 -10   3   60.79   11.90
   8 -10  -3   61.29   12.20
   8 -10  -3   67.19   13.20
   6  10  -1   97.69    8.20
   6  10  -1   91.89   22.30
  -6  10   1   91.39   14.10
   6  10  -1   87.09   11.10
  -6  10   1   80.39   13.70
   6  10  -1   82.09    7.90
   6 -10  -1   96.09   18.40
   6 -10  -1   74.99   11.60
   6 -10  -1   68.39   12.20
  -6 -10   1   70.19   12.90
   4  10   1   15.20   10.00
   4  10   1   18.00    3.10
  -4  10  -1   13.70    6.10
   4  10   1   12.40    2.40
   4  10   1    7.70    5.40
  -4  10  -1   18.40    7.30
   4 -10   1    4.40    6.70
   4 -10   1   13.00    6.20
  -4 -10  -1   12.40    5.20
  -2  10  -3   83.89   13.00
  -2  10  -3   75.89   13.10
   2  10   3   87.99   11.50
   2  10   3   99.09   18.50
   2 -10   3   91.29    8.00
   2 -10   3   80.59    8.80
  -2 -10  -3   91.39   11.80
   2 -10   3   81.69   14.30
  -2 -10  -3   97.79   17.60
   2 -10   3   94.59   13.50
   0  10   5 2724.53  116.49
   0  10  -5 2686.63  122.29
   0  10   5 2771.62  109.59
   0  10   5 2776.32  123.89
   0  10  -5 2813.12  116.39
   0 -10  -5 2794.42  124.49
   0 -10  -5 2789.52  109.89
   0 -10   5 2783.72  122.19
   0 -10   5 2833.92  108.29
   0 -10  -5 2796.02  116.69
   0 -10   5 2716.63  115.79
   0 -10   5 2764.32  108.59
  -2  10   7  350.86   27.00
   2  10  -7  327.17   28.40
  -2  10   7  279.47   19.70
  -2  10   7  299.47   21.90
   2  10  -7  302.57   19.90
   2 -10  -7  308.67   17.90
   2 -10  -7  302.87   26.60
  -2 -10   7  287.37   19.50
   2 -10  -7  311.57   21.40
  -4  10   9   41.20    9.80
   4  10  -9   39.80   14.10
   4  10  -9   31.70    5.10
  -4  10   9   27.20    7.60
   4  10  -9   30.60    6.60
   4 -10  -9   27.70    6.80
   4 -10  -9   30.30    8.20
   4 -10  -9   22.30   10.30
  -4 -10   9   19.80    5.50
  -4 -10   9   26.30    3.90
   6  10 -11   21.40    5.90
   6  10 -11   24.40   16.00
   6  10 -11   20.10    5.70
  -6  10  11   21.30   10.10
  -6  10  11   25.60    9.50
   6 -10 -11   19.00    7.80
  -6 -10  11   24.80    6.10
   6 -10 -11   24.30    8.20
  -6 -10  11   16.70    5.60
   8  10 -13   67.89   23.40
   8  10 -13   63.49   10.00
  -8 -10  13   60.49   10.90
   8 -10 -13   45.00   10.20
   8 -10 -13   43.40   11.20
  10  10 -15   17.90    8.20
  10  10 -15   -4.70   21.20
  10 -10 -15   39.30   12.50
 -10 -10  15   39.00   12.30
  11  11  -6   -6.20    4.50
  11  11  -6   -5.70    8.70
  11  11  -6  -12.80   18.00
  11  11  -6    6.40    7.90
  11  11  -6   -2.50    3.80
  11 -11  -6   -0.90    8.00
  11 -11  -6    1.00   10.80
   9  11  -4  139.79   29.50
   9  11  -4   72.29    9.70
   9  11  -4   59.39   15.00
   9  11  -4   80.99   11.20
   9  11  -4   77.49   10.10
   9 -11  -4   70.59   14.00
   9 -11  -4   46.90   11.70
   7  11  -2   12.50    4.70
  -7  11   2   22.10    9.50
   7  11  -2   13.70    4.00
   7  11  -2   -0.40    9.80
   7  11  -2    9.90    5.20
   7 -11  -2   12.00    7.70
  -7 -11   2   16.80    7.30
   7 -11  -2   15.90    7.90
  -5  11   0  156.88   19.30
   5  11   0  130.39    8.10
   5  11   0  124.49    7.20
   5  11   0  134.49   24.40
  -5  11   0  138.09   16.00
   5  11   0  134.19   14.70
   5 -11   0  119.49   21.00
  -5 -11   0  135.09   15.20
   5 -11   0  100.29   15.30
   5 -11   0  141.69   15.30
   3  11   2   77.79   17.00
  -3  11  -2   60.39   12.30
   3  11   2   81.69   11.20
  -3 -11  -2   79.39   11.20
   3 -11   2   64.09    8.50
   3 -11   2   60.49   11.30
   3 -11   2   72.59   15.20
   3 -11   2   78.89    9.80
  -1  11  -4   43.60    9.70
   1  11   4   65.89    4.60
   1  11   4   59.49   10.40
  -1  11  -4   68.79   14.90
   1  11   4   74.79   15.50
  -1 -11  -4   84.29   12.10
  -1 -11  -4   64.19    4.40
   1 -11   4   93.29   16.10
   1 -11   4   61.89    6.20
  -1 -11  -4   91.79   18.30
   1 -11   4   58.39   10.90
   1 -11   4   73.99    6.50
   1  11  -6  178.28   15.70
   1  11  -6  251.07   23.80
  -1  11   6  179.28   16.50
  -1  11   6  118.69   18.30
  -1  11   6  154.78   11.90
   1 -11  -6  164.18   15.60
  -1 -11   6  183.48   22.80
   1 -11  -6  183.78   11.90
   1 -11  -6  176.68   23.40
  -1 -11   6  156.48   15.10
  -3  11   8  112.69   14.80
   3  11  -8   99.19   20.70
   3  11  -8  109.19   12.70
  -3  11   8   98.79   12.30
   3 -11  -8   92.69   17.60
  -3 -11   8  126.99   13.50
   3 -11  -8   82.69   12.70
  -5  11  10  242.28   22.40
   5  11 -10  263.97   17.90
   5  11 -10  265.87   33.30
   5  11 -10  240.28   15.00
  -5  11  10  302.27   21.80
   5 -11 -10  278.47   22.70
   5 -11 -10  291.67   20.80
  -5 -11  10  268.07   14.50
  -5 -11  10  276.47   18.30
   7  11 -12  152.38   12.30
   7  11 -12  200.88   33.20
   7  11 -12  172.18   14.10
  -7 -11  12  172.28   13.60
  -7 -11  12  190.98   14.90
   7 -11 -12  161.38   20.00
   7 -11 -12  189.08   19.30
   9  11 -14    9.10    7.40
   9  11 -14  -13.50   16.90
   9 -11 -14   15.20    9.40
   9 -11 -14   37.00   13.50
  -9 -11  14   10.60    8.80
  11  11 -16   18.90   26.50
  11  11 -16   14.70   10.10
  11 -11 -16    5.10   20.70
  11 -11 -16   13.00   11.20
  10  12  -5   18.50    9.20
  10  12  -5   40.80    8.30
  10  12  -5   55.89   10.40
  10  12  -5   66.89   14.10
  10  12  -5   49.60   24.90
  10 -12  -5   48.70   13.70
  10 -12  -5   40.20   12.70
   8  12  -3   39.40   18.40
   8  12  -3   47.50    7.70
   8  12  -3   53.39    9.60
   8 -12  -3   47.60   11.30
   8 -12  -3   20.20    9.90
  -8 -12   3   42.70   10.70
   6  12  -1   71.29    6.60
   6  12  -1   57.39   18.20
   6  12  -1   74.09   11.00
   6  12  -1   72.99    5.80
  -6  12   1   77.99   15.50
   6 -12  -1   65.19   12.50
  -6 -12   1   71.69   12.30
   6 -12  -1   89.69   13.60
   4  12   1   69.89   10.50
  -4  12  -1   70.09   13.00
   4  12   1   65.19   16.30
   4 -12   1   58.09    9.70
   4 -12   1   54.69   14.40
   4 -12   1   60.39    9.20
   4 -12   1   63.79   12.20
  -4 -12  -1   69.49   10.50
  -2  12  -3  305.27   27.10
   2  12   3  264.77   27.70
   2  12   3  278.87   21.30
  -2  12  -3  292.67   22.90
   2 -12   3  286.67   15.90
   2 -12   3  268.67   25.70
  -2 -12  -3  240.88   20.40
  -2 -12  -3  312.47   30.10
   2 -12   3  281.87   21.90
   2 -12   3  279.27   16.40
   0  12   5  386.06   28.50
   0  12  -5  343.87   29.90
   0  12   5  349.37   17.70
   0  12   5  347.47   30.50
   0  12  -5  371.46   25.20
   0 -12   5  372.36   25.00
   0 -12  -5  344.77   31.00
   0 -12   5  348.67   15.50
   0 -12  -5  355.86   18.00
   0 -12   5  348.87   29.30
   0 -12   5  363.56   16.00
   0 -12  -5  415.56   26.30
  -2  12   7  200.98   24.50
  -2  12   7  218.78   19.90
   2  12  -7  218.78   18.00
   2  12  -7  247.68   29.30
  -2  12   7  231.58   15.70
  -2 -12   7  214.68   17.60
   2 -12  -7  215.48   14.70
   2 -12  -7  201.98   18.50
   2 -12  -7  291.17   28.40
  -4  12   9  436.96   26.70
   4  12  -9  409.36   37.80
   4  12  -9  407.46   25.30
  -4  12   9  404.36   32.80
   4 -12  -9  422.66   25.10
  -4 -12   9  415.76   25.50
   4 -12  -9  430.36   29.20
   6  12 -11   21.50   17.40
  -6  12  11   49.80   12.10
   6  12 -11   21.20    6.60
   6  12 -11   36.20    6.60
   6 -12 -11   40.30   11.00
  -6 -12  11   41.60    8.60
  -6 -12  11   36.70    5.90
   6 -12 -11   32.70    9.60
   8  12 -13   53.89   23.60
   8  12 -13   20.50    5.90
  -8 -12  13   21.90    8.30
  -8 -12  13   25.60    6.50
   8 -12 -13   -1.70    8.60
   8 -12 -13   18.10   10.80
  10  12 -15   71.79   12.00
  10  12 -15   57.39   28.00
 -10 -12  15   50.69   19.60
  10 -12 -15   58.89   16.70
  10 -12 -15   35.20   12.40
  11  13  -6  161.58   17.00
  11  13  -6  117.99   14.30
  11  13  -6  151.28   37.20
  11 -13  -6  150.28   21.70
  11 -13  -6  102.79   20.20
   9  13  -4   16.00   17.30
   9  13  -4   16.30    6.60
   9  13  -4   18.20    8.50
   9  13  -4   23.60    7.00
   9 -13  -4   19.00    9.70
   9 -13  -4   35.10   12.00
  -9 -13   4   10.00    9.00
   7  13  -2   68.89    6.00
   7  13  -2   69.89    6.70
   7  13  -2   76.19   12.30
   7  13  -2   42.80   16.60
  -7 -13   2   66.19   12.00
   7 -13  -2   68.99   15.30
   7 -13  -2   63.09   12.40
  -5  13   0   -0.40    7.10
   5  13   0   -8.00    5.90
   5  13   0    1.00   11.80
   5 -13   0   17.10    7.80
   5 -13   0    4.20    5.70
   5 -13   0   -4.20    5.40
  -5 -13   0   -1.60    5.80
   3  13   2  166.78   25.00
   3  13   2  178.78   17.60
  -3  13  -2  161.48   22.20
   3 -13   2  226.08   20.00
   3 -13   2  176.18   13.70
  -3 -13  -2  177.08   17.50
   3 -13   2  156.48   12.80
   3 -13   2  221.08   27.10
   1  13   4   17.70    8.50
  -1  13  -4    5.60    8.00
   1  13   4   -3.80    9.10
  -1  13  -4   10.60   11.20
   1 -13   4    6.60    3.20
  -1 -13  -4    9.70    6.50
  -1 -13  -4   28.50   13.10
   1 -13   4   13.20    4.00
   1 -13   4    8.30    6.90
   1 -13   4  -10.30    9.80
  -1  13   6   16.60    8.70
  -1  13   6   10.60    4.30
   1  13  -6   15.00    8.30
  -1  13   6    6.40    7.90
   1  13  -6   18.40   11.90
   1 -13  -6    8.20   11.30
  -1 -13   6   13.50    7.40
   1 -13  -6    4.20    4.20
  -1 -13   6    4.50    9.70
   1 -13  -6   14.90    7.10
   3  13  -8 1082.69   66.59
  -3  13   8 1009.40   49.90
   3  13  -8 1068.39   52.59
   3 -13  -8 1146.29   55.89
   3 -13  -8 1048.50   49.10
  -3 -13   8 1035.20   51.99
   5  13 -10  103.79   22.50
  -5  13  10   72.99   13.80
   5  13 -10   77.69   12.00
   5 -13 -10  104.79   18.70
  -5 -13  10   82.79   12.00
   5 -13 -10  108.39   13.80
   7  13 -12   56.09   22.70
   7  13 -12  154.38   14.20
   7  13 -12  106.39   11.10
   7 -13 -12  131.19   18.10
  -7 -13  12  141.49   20.80
   7 -13 -12  183.68   22.60
   9  13 -14   79.89   27.50
   9  13 -14   54.19    7.10
   9  13 -14   57.39   10.30
  -9 -13  14   75.69   12.50
   9 -13 -14   62.19   15.20
   9 -13 -14   57.39   14.60
  10  14  -5   31.80    7.50
  10  14  -5   40.20   25.80
  10  14  -5   21.10   13.70
  10 -14  -5    4.30   10.00
  10 -14  -5   16.40   12.30
   8  14  -3   58.69   11.70
   8  14  -3   23.30   20.70
   8 -14  -3   36.10   12.10
   8 -14  -3   42.10   12.50
  -8 -14   3   42.60   11.80
   6  14  -1   37.50   17.40
   6  14  -1   26.30   10.00
  -6  14   1   28.40   10.90
   6 -14  -1   25.60    9.10
   6 -14  -1   14.40    8.60
  -6 -14   1   25.20    9.30
   6 -14  -1   26.20   10.80
   4  14   1   17.00    8.60
  -4 -14  -1   22.70    9.20
   4 -14   1    6.00    5.80
   4 -14   1   15.90    6.40
  -2  14  -3   21.40   12.20
   2  14   3   33.50   10.30
   2  14   3   24.40   13.20
   2 -14   3   24.10    5.70
  -2 -14  -3   15.90    8.60
   2 -14   3   16.20   12.40
   2 -14   3   34.90   10.50
   2 -14   3   23.70    5.30
   0  14   5   -0.20    2.90
   0  14   5   18.80   11.80
   0  14  -5    7.20    8.30
   0  14  -5   11.50   10.20
   0 -14  -5    4.40    3.00
   0 -14  -5   -1.10    5.50
   0 -14   5   -4.10    9.90
   0 -14   5   13.80    9.00
  -2  14   7   38.70    8.10
  -2  14   7   33.10   14.10
   2  14  -7   70.09   13.20
   2  14  -7   47.10   16.90
   2 -14  -7   58.79   12.50
   2 -14  -7   49.10    8.10
  -2 -14   7   48.20   11.10
   4  14  -9  122.49   15.90
  -4  14   9  119.09   15.20
   4  14  -9  132.99   26.70
   4 -14  -9  114.79   14.10
  -4 -14   9  156.08   17.30
   4 -14  -9  123.09   17.50
   6  14 -11   10.20    7.10
   6  14 -11   -1.30   14.30
  -6 -14  11    6.30    5.80
   6 -14 -11    4.70    6.90
   6 -14 -11   -0.60    8.90
   8  14 -13   69.79    9.00
   8  14 -13   77.49   11.20
   8  14 -13   80.69   28.90
   8  14 -13   86.79    8.60
   8 -14 -13   83.49   14.80
   8 -14 -13   49.80   13.80
  -8 -14  13  109.49   13.20
  10  14 -15    1.40    9.70
  10  14 -15   17.80   29.20
  10 -14 -15   -6.10   11.70
  10 -14 -15   -5.90   10.70
   9  15  -4  192.98   42.30
   9  15  -4  192.28   25.90
   9 -15  -4  232.28   28.00
   9 -15  -4  191.98   24.80
  -9 -15   4  202.88   23.30
   7  15  -2   58.89   22.00
   7  15  -2   77.79   14.00
   7 -15  -2   66.59   14.70
  -7 -15   2   77.89   14.90
   7 -15  -2   58.99   12.50
   5  15   0   30.00   13.50
   5  15   0   35.80   15.70
   5 -15   0   13.40    8.10
   5 -15   0   13.10    9.90
   5 -15   0   30.80    9.10
  -5 -15   0   14.50    8.80
  -3  15  -2   38.40   13.60
   3  15   2   50.19   18.50
   3 -15   2   53.09    8.60
   3 -15   2   68.29   14.40
   3 -15   2   55.19    8.30
  -3 -15  -2   52.39   11.30
  -1  15  -4   66.69   17.40
   1 -15   4   85.49    6.40
   1 -15   4   76.49   13.00
   1 -15   4   91.39    7.10
  -1 -15  -4   83.69   14.10
   1  15  -6   56.09   17.30
  -1  15   6   53.49   20.40
  -1  15   6   47.90    7.20
   1 -15  -6   52.09    7.50
  -1 -15   6   44.80   11.50
   3  15  -8   93.89   14.50
  -3  15   8   98.89   13.60
   3 -15  -8   55.09   12.00
   3 -15  -8  115.69   12.60
  -3 -15   8   94.69   14.40
   5  15 -10  143.49   17.70
  -5  15  10  139.69   18.10
   5  15 -10   74.79   26.30
  -5 -15  10  135.09   16.80
   5 -15 -10  155.48   20.70
   5 -15 -10  140.69   16.80
   7  15 -12   62.69   20.70
   7  15 -12   20.10   10.00
   7 -15 -12   49.80   13.30
   7 -15 -12   26.10   10.80
  -7 -15  12   46.40   10.90
   9  15 -14  125.29   34.40
   9 -15 -14  161.28   23.50
  -9 -15  14  135.49   14.20
   9 -15 -14  113.29   22.00
   8  16  -3   71.89   27.50
   8 -16  -3  101.69   20.10
   8 -16  -3   43.90   13.40
  -8 -16   3   53.09   14.40
   6  16  -1   14.80   19.70
  -6 -16   1   18.90   11.10
   6 -16  -1    0.80    9.40
   6 -16  -1   -8.90    7.30
   6 -16  -1    2.90   10.10
   4  16   1   22.60   16.60
   4 -16   1   17.10    7.40
  -4 -16  -1    3.70    9.10
   4 -16   1    9.90   10.00
   4 -16   1   15.60    6.90
  -2  16  -3  207.28   34.90
   2  16   3  291.37   38.30
   2 -16   3  248.78   14.80
  -2 -16  -3  219.28   27.60
   2 -16   3  241.88   14.80
   2 -16   3  219.88   22.80
   0  16   5   17.50   14.80
   0 -16   5   46.20   13.70
   0 -16  -5   35.50    9.90
  -2  16   7   20.30    7.10
   2  16  -7    2.10   12.90
  -2  16   7    3.30   13.60
  -2 -16   7   17.30    8.20
   2 -16  -7   11.80    5.80
   2 -16  -7    8.90   10.20
  -4  16   9   34.90   10.50
   4  16  -9    0.50   14.90
  -4 -16   9   23.10   10.00
   4 -16  -9   42.30   12.20
   4 -16  -9   55.29   10.60
   6  16 -11   30.30   12.30
   6  16 -11   22.70   20.20
   6 -16 -11   -2.00    9.20
  -6 -16  11   14.20    9.80
   6 -16 -11    1.50    8.50
   8 -16 -13   -6.10    9.90
   8 -16 -13    0.20   11.00
  -8 -16  13    0.60    8.90
   7  17  -2   50.09   27.40
   7 -17  -2   67.49   17.60
   7 -17  -2   90.39   17.60
   5  17   0   -5.90   18.10
   5 -17   0    1.00   12.80
  -5 -17   0    2.40    8.70
   5 -17   0    1.60    8.20
   5 -17   0    0.20    7.60
  -3  17  -2    9.30   13.30
   3  17   2    7.70   13.40
   3 -17   2   11.30    9.40
   3 -17   2   23.30    7.00
  -3 -17  -2   15.50    9.50
   1  17   4   90.79   22.50
  -1  17  -4   87.99   22.90
   1 -17   4   90.69   16.40
  -1 -17  -4   94.59   17.50
   1  17  -6  189.58   29.70
  -1  17   6   96.89   22.90
  -1 -17   6  180.08   22.70
   1 -17  -6  153.08    9.30
   1 -17  -6  152.98   10.80
   1 -17  -6  129.19   19.50
   3  17  -8  229.78   37.90
  -3  17   8  232.08   20.10
  -3 -17   8  254.47   36.00
   3 -17  -8  243.48   25.00
   3 -17  -8  242.58   19.00
   5  17 -10  -11.10   18.30
  -5  17  10   34.90   13.90
  -5 -17  10   -3.30    8.00
   5 -17 -10   12.00   11.20
   5 -17 -10   15.80    9.20
   7  17 -12   20.30   26.40
  -7 -17  12    4.10    9.20
   7 -17 -12   -3.80   13.50
   7 -17 -12   14.10   12.10
   6  18  -1    9.20   36.70
   6 -18  -1   -3.90   15.30
  -6 -18   1   20.30   12.80
   6 -18  -1   11.50   10.20
   4  18   1   16.50   18.90
   4 -18   1    6.30   11.60
   4 -18   1   16.50    8.40
  -4 -18  -1   13.70   11.60
   4 -18   1   16.10    7.70
   2  18   3   12.40   16.00
  -2  18  -3   28.00   16.10
   2 -18   3   15.70   11.30
  -2 -18  -3    1.70    9.20
   2 -18   3   15.00    4.80
   2 -18   3   10.40    3.60
   0  18   5   11.60   14.50
   0  18  -5   15.80   14.70
   0 -18  -5   41.20   15.00
   0 -18   5   25.50   11.90
   2  18  -7    5.00   16.80
  -2  18   7   54.59   19.20
   2 -18  -7   27.80   11.80
   2 -18  -7   30.90    7.90
  -2 -18   7   52.19   13.20
   4  18  -9   66.19   27.00
  -4  18   9   92.49   15.90
   4 -18  -9  107.79   21.20
   4 -18  -9   88.49   13.50
  -4 -18   9   67.59   13.40
  -6 -18  11   11.10   10.30
   6 -18 -11   -1.40   10.30
   5  19   0   67.09   24.90
   5 -19   0   24.40   12.60
  -5 -19   0   69.59   17.30
   5 -19   0   53.89   11.80
   5 -19   0   41.50   14.40
   3  19   2   86.19   23.20
  -3 -19  -2   61.59   16.80
   3 -19   2   86.39    9.90
   3 -19   2   68.19   18.20
   1  19   4  189.88   34.00
  -1  19  -4  230.88   35.40
   1 -19   4  242.18   29.10
  -1 -19  -4  267.77   25.70
  -1  19   6   44.90   19.10
   1  19  -6   82.09   22.30
   1 -19  -6   91.49   19.40
  -1 -19   6   62.09   16.20
   3  19  -8   50.79   24.00
   3 -19  -8   67.29   15.70
   3 -19  -8  101.59   11.70
   3 -19  -8   88.29   12.70
  -3 -19   8  109.69   18.70
   5  19 -10   38.30   31.30
   5 -19 -10   14.60   10.30
   5 -19 -10  -10.10   10.20
  -5 -19  10    7.00   10.20
   4  20   1   20.50   22.00
   4 -20   1   43.50   12.20
   4 -20   1   52.79   15.50
  -4 -20  -1   22.70   14.00
   2  20   3    6.80   22.20
  -2  20  -3    1.70   19.20
  -2 -20  -3   -5.70   10.80
   0  20  -5  164.38   31.90
   0 -20  -5  172.98   25.00
   0 -20   5  150.58   23.40
   2  20  -7    1.50   19.70
  -2  20   7   50.69   23.80
  -2 -20   7    5.90   12.10
   2 -20  -7    0.60   11.00
  -1  21  -4   66.69   25.80
   1  21   4   86.39   27.50
   1 -21   4   81.69   19.30
  -1 -21  -4   50.99   18.90
  12   0  -6  381.76   31.60
  12   0  -6  375.46   20.80
  10   0  -4  641.24   50.59
  10   0  -4  792.02   44.30
  10   0  -4  776.62   35.90
   8   0  -2  905.51   47.60
  -8   0   2  939.21   48.60
   8   0  -2  970.40   42.70
  -8   0   2  933.21   47.40
  -6   0   0   29.70    7.20
  -6   0   0   37.10    7.60
   6   0   0   28.50    8.70
   6   0   0   35.80    6.20
  -4   0  -2    6.20    3.40
   4   0   2   11.90    4.20
  -4   0  -2   13.90    3.90
   4   0   2   12.00    3.90
   2   0   4   -1.30    2.60
   2   0   4   -0.90    1.30
  -2   0  -4    2.20    2.80
  -2   0  -4    5.80    2.00
   0   0  -6  175.58   10.10
   0   0   6  164.68   10.00
  -2   0   8   74.89    5.20
   2   0  -8   71.69    5.50
   2   0  -8   77.59    6.70
  -2   0   8   69.19    6.60
   4   0 -10   30.60    3.70
  -4   0  10   35.30    3.70
   4   0 -10   25.00    5.30
  -4   0  10   26.30    5.20
   6   0 -12  670.93   28.00
  -6   0  12  650.13   35.30
  -6   0  12  667.43   27.80
   6   0 -12  656.23   34.50
   8   0 -14  442.36   28.40
  -8   0  14  429.56   29.10
  10   0 -16  102.09   15.90
  12   0 -18   11.30   10.40
  13   1  -7   40.00   13.90
  13   1  -7   43.70    5.70
  13   1  -7   35.90    5.10
  13  -1  -7   38.50   14.50
  13  -1  -7   42.60   10.20
  13  -1  -7   48.40    8.40
  11   1  -5  125.39   19.20
  11   1  -5   99.49   11.30
  11   1  -5   81.49    9.20
 -11   1   5   83.99   16.10
  11  -1  -5   98.99   17.00
  11  -1  -5   89.89   10.60
   9   1  -3 1733.13   77.39
   9   1  -3 1552.44   73.39
  -9   1   3 1685.63   78.69
   9   1  -3 1674.63   69.69
  -9   1   3 1711.13   76.79
   9  -1  -3 1650.33   70.99
  -9  -1   3 1671.93   77.99
   9  -1  -3 1586.14   76.89
  -7   1   1  628.64   34.40
  -7   1   1  630.94   33.10
   7   1  -1  567.44   32.50
   7   1  -1  620.24   29.60
   7   1  -1  622.74   33.50
  -7  -1   1  616.24   33.80
   7  -1  -1  610.24   34.00
   7  -1  -1  577.04   29.60
  -5   1  -1   38.20    7.10
   5   1   1   54.49    7.50
   5   1   1   47.20    7.50
  -5   1  -1   58.49    8.20
  -5  -1  -1   52.99    9.10
  -5  -1  -1   52.79    8.00
   5  -1   1   35.40    6.00
   5  -1   1   36.40    7.20
   3   1   3    1.40    3.00
  -3   1  -3    3.90    3.00
   3   1   3    4.10    2.90
   3   1   3    2.70    2.30
   3   1   3    1.90    1.70
   3  -1   3    2.90    2.70
   3  -1   3    3.70    2.50
   3  -1   3    4.60    2.50
  -1   1  -5  447.86   21.40
  -1   1  -5  511.95   23.60
   1   1   5  475.05   23.10
   1   1   5  482.55   21.60
   1   1   5  490.85   21.80
   1  -1   5  495.15   21.60
   1  -1   5  446.86   23.10
  -1  -1  -5  485.05   23.30
  -1  -1  -5  495.05   21.80
  -1  -1  -5  505.05   22.10
   1   1  -7  134.39    8.80
  -1   1   7  131.89    8.20
   1   1  -7  159.38   10.30
  -1   1   7  153.28    9.20
   1  -1  -7  143.29    9.00
   1  -1  -7  145.19    8.60
  -1  -1   7  129.89    8.60
  -1  -1   7  144.49    9.60
  -3   1   9 1750.92   70.89
  -3   1   9 1783.32   73.89
   3   1  -9 1766.32   73.29
  -3  -1   9 1765.02   69.39
  -3  -1   9 1732.93   71.19
   3  -1  -9 1757.02   70.99
   3  -1  -9 1798.12   73.79
  -3  -1   9 1885.51   73.79
   5   1 -11  224.38   15.40
  -5   1  11  217.58   11.70
  -5   1  11  214.28   16.10
   5  -1 -11  211.28   11.70
   5  -1 -11  218.98   15.50
  -5  -1  11  209.38   15.60
   7   1 -13   52.39    9.90
  -7   1  13   49.80   10.20
  -7   1  13   53.09    5.50
   7  -1 -13   58.99    6.00
  -7  -1  13   54.09   10.20
   7  -1 -13   62.19   11.00
  -9   1  15   19.60    4.70
   9   1 -15   16.50    8.80
   9  -1 -15   28.20    9.10
   9  -1 -15   27.10    4.10
  11   1 -17   12.80    9.40
  11  -1 -17   -2.30    9.00
  13   1 -19   94.59   20.10
  13  -1 -19  115.69   22.80
  14   2  -8   45.80   15.50
  14  -2  -8   66.09   18.60
  12   2  -6  152.18   21.90
  12   2  -6   83.59    7.30
 -12   2   6  127.39   17.30
  12   2  -6   74.09    7.70
  12  -2  -6   83.09   16.50
  12  -2  -6   83.89   10.70
  10   2  -4  677.13   33.70
  10   2  -4  696.43   32.30
  10   2  -4  672.03   40.90
 -10   2   4  728.43   41.10
  10  -2  -4  750.42   42.90
   8   2  -2  160.38   13.50
   8   2  -2  158.38   15.60
  -8   2   2  135.59   16.40
   8   2  -2  152.08   11.50
  -8   2   2  163.78   15.00
   8  -2  -2  162.38   16.10
  -8  -2   2  157.18   17.30
   8  -2  -2  159.18   13.10
   6   2   0   39.80    6.90
  -6   2   0   43.60    7.40
   6   2   0   37.20    7.50
   6   2   0   50.39    7.50
  -6   2   0   22.70    6.30
   6  -2   0   33.60    6.30
   6  -2   0   33.70    8.00
  -6  -2   0   39.80    8.00
  -4   2  -2  766.82   36.60
   4   2   2  779.12   36.20
   4   2   2  740.63   35.50
  -4   2  -2  792.02   36.30
   4   2   2  840.02   34.90
   4   2   2  747.03   38.50
   4  -2   2  771.12   35.60
  -4  -2  -2  771.02   35.60
   4  -2   2  778.02   36.60
   2   2   4   66.09    7.90
   2   2   4   61.59    6.20
  -2   2  -4   64.39    6.50
  -2   2  -4   62.79    5.60
   2   2   4   59.99    5.00
   2  -2   4   69.29    6.50
   2  -2   4   61.89    6.30
  -2  -2  -4   55.59    4.90
  -2  -2  -4   71.39    7.80
   2  -2   4   68.29    5.70
   0   2   6  342.17   16.50
   0   2  -6  325.27   15.70
   0   2   6  320.77   16.10
   0   2  -6  331.47   16.60
   0   2   6  331.07   16.70
   0  -2   6  311.97   16.20
   0  -2   6  341.67   16.30
   0  -2  -6  344.37   16.50
   0  -2  -6  324.47   16.90
   0  -2  -6  324.57   16.20
  -2   2   8    8.20    2.70
  -2   2   8   11.60    3.40
   2   2  -8    7.50    2.70
   2   2  -8    8.60    3.10
   2  -2  -8    8.70    2.80
  -2  -2   8    8.30    2.10
   2  -2  -8   10.30    3.60
  -2  -2   8   11.10    3.00
  -4   2  10 1683.53   66.89
   4   2 -10 1676.23   68.99
  -4   2  10 1598.04   70.29
   4  -2 -10 1626.14   69.69
   4  -2 -10 1592.14   66.59
   6   2 -12    3.20    4.50
  -6   2  12   11.50    5.80
  -6   2  12   13.00    3.70
   6  -2 -12    8.80    5.30
   6  -2 -12   15.90    3.90
  -6  -2  12   14.20    5.40
  -8   2  14  431.06   21.60
   8   2 -14  382.46   26.20
  -8   2  14  419.56   29.00
   8  -2 -14  395.36   26.80
   8  -2 -14  397.06   20.70
  -8  -2  14  410.16   28.00
 -10   2  16   14.70    5.30
  10  -2 -16   14.80    9.10
  10  -2 -16   18.50    4.90
  12   2 -18   21.40   11.60
  12  -2 -18   51.29   15.90
  13   3  -7   31.40   12.30
 -13   3   7   -1.60   16.40
  13  -3  -7   24.20    8.20
  13  -3  -7   40.50   12.50
 -11   3   5  197.38   22.80
  11   3  -5  191.68   12.20
  11   3  -5  207.58   23.40
  11   3  -5  209.38   12.30
  11  -3  -5  205.38   16.60
  11  -3  -5  214.88   21.50
  -9   3   3   49.30   12.60
   9   3  -3   35.00    6.10
   9   3  -3   35.30    6.40
  -9   3   3   62.89   11.20
   9   3  -3   60.09   11.20
  -9  -3   3   29.80   12.60
   9  -3  -3   40.00    8.00
   9  -3  -3   38.80   10.20
   7   3  -1  348.47   19.40
  -7   3   1  330.57   21.60
   7   3  -1  375.16   20.30
   7   3  -1  372.26   22.80
  -7   3   1  320.77   23.30
   7  -3  -1  309.27   20.10
   7  -3  -1  356.46   23.90
  -7  -3   1  332.87   22.00
   5   3   1  284.57   17.50
   5   3   1  286.37   16.50
  -5   3  -1  285.17   17.80
   5   3   1  318.17   20.80
  -5   3  -1  322.07   19.50
   5  -3   1  291.77   18.90
   5  -3   1  283.07   17.50
  -5  -3  -1  277.97   17.30
   3   3   3  614.34   28.60
  -3   3  -3  616.74   29.90
  -3   3  -3  658.33   30.30
   3   3   3  606.34   33.00
   3   3   3  592.24   28.90
   3   3   3  636.74   27.90
   3  -3   3  668.73   30.20
  -3  -3  -3  649.83   30.20
   3  -3   3  662.73   30.20
   3  -3   3  601.34   28.70
  -1   3  -5  151.88    9.30
   1   3   5  177.78   11.90
  -1   3  -5  155.38   10.30
   1   3   5  163.28   10.40
  -1   3  -5  173.48    9.50
   1   3   5  151.88    9.60
  -1  -3  -5  167.48    9.50
  -1  -3  -5  171.98   10.50
   1  -3   5  158.48    9.20
   1  -3   5  150.98   10.30
  -1  -3  -5  175.38   12.40
   1  -3   5  163.58    9.70
  -1   3   7  245.28   13.60
   1   3  -7  255.37   13.30
  -1   3   7  268.17   14.10
   1   3  -7  258.27   13.50
   1  -3  -7  246.58   13.90
  -1  -3   7  239.98   12.90
   1  -3  -7  242.98   15.50
  -1  -3   7  264.87   13.10
   1  -3  -7  248.98   13.60
  -3   3   9  290.87   15.70
  -3   3   9  288.37   18.70
   3   3  -9  310.37   16.20
   3   3  -9  270.07   14.10
  -3  -3   9  298.57   16.00
  -3  -3   9  283.67   13.00
   3  -3  -9  299.07   17.00
   3  -3  -9  291.97   15.80
   5   3 -11   31.30    6.30
  -5   3  11   22.80    4.70
  -5   3  11   34.10    7.40
  -5  -3  11   31.60    6.30
   5  -3 -11   29.20    6.50
   5  -3 -11   24.10    5.00
  -7   3  13    8.20    4.20
   7   3 -13   11.10    6.30
   7  -3 -13   17.00    4.80
  -7  -3  13   12.30    6.80
   7  -3 -13   12.00    6.90
  -9   3  15   14.80    7.00
   9   3 -15   16.90    7.60
  -9  -3  15   20.30    9.50
   9  -3 -15    6.20    6.20
   9  -3 -15   14.00    4.80
 -11   3  17   70.79   10.80
  11   3 -17   87.09   14.90
  11  -3 -17   72.19    8.80
  11  -3 -17   90.89   17.20
  13   3 -19  105.69   18.90
  13  -3 -19  125.09   23.00
  14   4  -8   67.09   16.90
  14  -4  -8   42.60   10.30
  14  -4  -8   40.70   16.20
 -12   4   6   23.00   14.40
  12   4  -6   19.50    9.80
  12  -4  -6   19.70   12.00
  12  -4  -6    2.50    6.70
 -10   4   4   43.70   11.20
  10   4  -4   50.89    6.30
  10   4  -4   64.69    7.10
  10   4  -4   56.69   12.60
  10  -4  -4   47.20   17.90
 -10  -4   4   36.90   12.30
  10  -4  -4   41.30    9.00
   8   4  -2   82.19    8.10
   8   4  -2   67.49   11.20
   8   4  -2   75.79    9.30
  -8   4   2   78.49   13.40
  -8   4   2   89.19   11.60
   8  -4  -2  108.09   15.80
   8  -4  -2   80.59   10.90
  -8  -4   2   64.09   12.10
   6   4   0   25.60    5.10
   6   4   0   24.90    7.30
   6   4   0   16.60    5.60
  -6   4   0   34.30    7.90
  -6   4   0   18.30    6.70
   6  -4   0   23.20    7.10
   6  -4   0   19.20    5.10
  -6  -4   0   26.90    6.70
  -4   4  -2  207.98   14.70
   4   4   2  206.98   13.10
   4   4   2  216.88   12.40
  -4   4  -2  226.28   16.60
   4   4   2  214.28   13.10
  -4  -4  -2  228.08   14.70
   4  -4   2  193.38   13.70
   4  -4   2  189.28   14.10
   2   4   4 1955.50   86.99
   2   4   4 2026.60   83.19
   2   4   4 2043.00   81.29
  -2   4  -4 2083.19   84.39
   2  -4   4 2009.80   83.19
  -2  -4  -4 2020.20   83.29
  -2  -4  -4 2050.59   87.99
   2  -4   4 2049.59   83.79
   2  -4   4 2018.40   81.99
  -2  -4  -4 2069.29   80.99
   2  -4   4 2166.18   84.39
   0   4  -6   75.59    5.90
   0   4   6   78.99    6.20
   0   4   6   76.89    7.00
   0   4  -6   78.79    6.90
   0   4   6   73.29    8.70
   0   4  -6   87.89    8.30
   0  -4  -6   69.19    6.90
   0  -4  -6   60.29    8.60
   0  -4   6   80.99    6.20
   0  -4  -6   77.59    6.30
   0  -4   6   74.99    7.70
   0  -4   6   83.99    7.00
   2   4  -8   42.90    5.40
  -2   4   8   45.90    6.40
  -2   4   8   32.50    5.40
   2   4  -8   38.80    4.90
   2  -4  -8   30.10    5.00
   2  -4  -8   38.00    7.50
  -2  -4   8   38.40    4.70
  -2  -4   8   38.90    4.60
   2  -4  -8   25.40    4.90
  -4   4  10   50.09    8.30
  -4   4  10   33.90    5.70
   4   4 -10   27.20    5.10
   4   4 -10   26.20    3.40
   4  -4 -10   20.30    5.60
  -4  -4  10   24.90    2.70
  -4  -4  10   24.30    5.10
   4  -4 -10   21.00    5.00
   6   4 -12  123.59   11.90
  -6   4  12  106.99   10.00
  -6   4  12  111.19   13.90
   6  -4 -12   93.09    9.70
   6  -4 -12   96.49   12.70
  -6  -4  12  120.09   13.40
  -8   4  14  368.96   22.50
   8   4 -14  389.56   24.90
  -8   4  14  414.06   40.00
   8  -4 -14  392.96   22.20
   8  -4 -14  392.86   26.80
  -8  -4  14  342.27   26.30
 -10   4  16   48.80    9.50
  10   4 -16   51.79   11.80
  10  -4 -16   49.30   12.20
  10  -4 -16   55.09    8.20
 -12   4  18   18.50   13.40
  12   4 -18    3.90    9.30
  12  -4 -18   24.00   13.70
  12  -4 -18   15.30    6.40
  13   5  -7   -0.60    9.00
 -13   5   7  -15.50   18.50
  13  -5  -7    8.20    7.40
  13  -5  -7  -11.50   10.40
 -11   5   5   21.40   13.30
  11   5  -5   31.50    4.10
  11   5  -5   48.30    4.70
  11   5  -5   56.79   12.70
  11  -5  -5   35.80   12.70
  11  -5  -5   43.30    9.20
   9   5  -3   18.50    7.90
  -9   5   3   31.20    9.90
   9   5  -3   14.30    4.70
   9   5  -3   21.60    4.60
   9  -5  -3   32.60   10.90
  -9  -5   3   33.20    8.40
   9  -5  -3   15.50    6.80
   7   5  -1   37.70    6.10
   7   5  -1   36.40    7.70
  -7   5   1   38.40    7.90
  -7   5   1   38.00    9.40
   7   5  -1   40.40    9.00
  -7  -5   1   28.00    7.00
   7  -5  -1   53.69   10.60
   7  -5  -1   29.00    7.30
   5   5   1  121.49    9.60
  -5   5  -1  130.99   12.20
   5   5   1  137.09   10.20
  -5   5  -1  136.79   12.50
   5   5   1  139.89   10.80
  -5  -5  -1  142.19   12.00
   5  -5   1  128.19   12.30
   3   5   3  359.56   18.30
   3   5   3  326.47   16.60
   3   5   3  328.47   16.00
  -3   5  -3  308.97   19.40
  -3   5  -3  314.27   18.40
   3   5   3  359.56   24.00
   3  -5   3  308.47   18.40
   3  -5   3  333.67   19.50
   3  -5   3  302.97   19.80
   3  -5   3  360.96   18.00
  -3  -5  -3  321.87   18.30
  -1   5  -5 1127.29   49.60
  -1   5  -5 1086.19   45.90
   1   5   5 1082.49   45.80
   1   5   5 1122.19   48.40
  -1   5  -5 1090.99   48.50
   1   5   5 1092.99   51.79
   1  -5   5 1066.69   49.10
  -1  -5  -5 1205.88   53.19
   1  -5   5 1125.59   46.00
   1  -5   5 1100.89   46.70
   1  -5   5 1124.19   48.70
  -1  -5  -5 1154.48   46.10
  -1  -5  -5 1086.29   48.40
  -1   5   7   58.89    8.90
   1   5  -7   68.79    6.20
   1   5  -7   79.89    6.90
  -1   5   7   77.69    6.70
   1   5  -7   73.49   10.70
  -1   5   7   66.09    7.90
   1  -5  -7   86.59    8.00
  -1  -5   7   90.59    7.30
   1  -5  -7   81.59    6.80
  -1  -5   7   75.89    5.90
   1  -5  -7   50.19    8.90
  -3   5   9    7.30    4.20
  -3   5   9   14.90    4.80
   3   5  -9    6.90    3.10
   3   5  -9    7.10    2.70
  -3  -5   9    5.80    2.90
   3  -5  -9    3.80    3.40
   3  -5  -9   15.10    6.00
  -3  -5   9    6.90    2.40
   3  -5  -9    2.70    3.40
  -5   5  11    9.60    4.60
   5   5 -11   12.90    2.80
  -5   5  11   13.30    5.80
   5   5 -11   15.10    5.00
  -5  -5  11    7.10    3.50
  -5  -5  11   12.50    1.90
   5  -5 -11    9.50    4.70
   5  -5 -11   13.90    5.30
  -7   5  13  284.97   18.70
   7   5 -13  258.57   19.10
  -7   5  13  303.97   23.80
  -7  -5  13  277.77   20.10
   7  -5 -13  278.07   21.60
   9   5 -15  274.97   21.40
  -9   5  15  262.07   19.60
   9  -5 -15  250.17   23.50
   9  -5 -15  300.57   19.20
  -9  -5  15  243.28   23.00
  11   5 -17   39.70   11.30
 -11   5  17   30.50    9.90
  11  -5 -17   48.30   13.40
  11  -5 -17   40.70    8.90
  13   5 -19  -12.70    9.80
  13  -5 -19    0.30   13.30
 -12   6   6   -5.90   14.30
  12   6  -6   23.60    9.00
  12  -6  -6   13.80    8.30
  12  -6  -6   -4.10   11.00
 -10   6   4   46.30   14.60
  10   6  -4   24.70    8.40
  10   6  -4   30.80    5.60
  10   6  -4   41.30    5.60
 -10  -6   4   48.50   11.20
  10  -6  -4   45.40   10.40
  10  -6  -4   36.10   10.70
  -8   6   2   14.10    8.20
   8   6  -2   15.30    6.20
  -8   6   2   12.50    7.60
   8   6  -2   13.80    6.30
   8   6  -2   15.70    4.50
  -8  -6   2    1.20    5.20
   8  -6  -2    8.40    6.20
   8  -6  -2    7.80    7.20
  -6   6   0   64.59   10.10
   6   6   0   86.49   10.10
  -6   6   0   83.99   12.20
   6   6   0   70.19    8.20
   6   6   0   74.19    8.90
   6  -6   0   84.89   11.60
   6  -6   0  101.39   13.30
  -6  -6   0   67.59    9.70
  -4   6  -2  332.57   19.90
  -4   6  -2  282.17   19.50
   4   6   2  328.77   16.80
   4   6   2  308.77   16.00
   4   6   2  349.96   18.60
   4  -6   2  276.67   19.10
   4  -6   2  320.77   19.40
  -4  -6  -2  298.67   18.40
   4  -6   2  322.17   22.10
   2   6   4  107.49    7.90
   2   6   4  118.79    9.80
   2   6   4  142.09   17.00
  -2   6  -4  117.99   11.20
  -2   6  -4  116.89   10.50
  -2  -6  -4  105.49    6.90
   2  -6   4  120.99   10.60
   2  -6   4  115.19    9.20
   2  -6   4  118.69   11.30
  -2  -6  -4  100.89   14.10
  -2  -6  -4  121.09   10.10
   2  -6   4  121.59    8.40
   0   6   6  332.17   16.60
   0   6  -6  323.87   18.80
   0   6   6  350.26   22.40
   0   6  -6  341.77   16.00
   0   6  -6  363.26   22.10
   0  -6  -6  346.47   17.10
   0  -6  -6  332.47   19.30
   0  -6   6  362.96   21.80
   0  -6   6  349.37   19.20
   0  -6   6  328.27   16.40
  -2   6   8   27.30    5.50
   2   6  -8   18.60    4.00
   2   6  -8   25.10    8.00
  -2   6   8   20.00    5.20
   2   6  -8   27.30    4.80
   2  -6  -8   23.60    7.40
  -2  -6   8   32.10    5.40
   2  -6  -8   29.20    5.80
   2  -6  -8   25.10    5.00
  -2  -6   8   34.70    4.30
   4   6 -10   34.40    5.80
  -4   6  10   28.10    7.00
   4   6 -10   33.60    4.70
  -4   6  10   37.80    7.40
  -4  -6  10   34.40    5.50
   4  -6 -10   40.40    7.10
  -4  -6  10   33.10    4.60
   4  -6 -10   40.60    7.40
   4  -6 -10   15.30    7.50
  -6   6  12  462.05   26.30
  -6   6  12  454.85   29.00
  -6  -6  12  445.76   25.40
   6  -6 -12  404.76   24.80
   6  -6 -12  482.35   27.80
  -8   6  14  261.57   19.70
   8   6 -14  279.57   20.80
   8  -6 -14  282.77   22.70
  -8  -6  14  283.07   21.90
   8  -6 -14  281.37   19.70
 -10   6  16  394.66   27.80
  10   6 -16  425.26   29.10
  10  -6 -16  420.96   32.00
  10  -6 -16  389.46   25.20
  12   6 -18   -0.70    9.30
 -12   6  18   -4.20   12.50
  12  -6 -18   15.50    8.30
  12  -6 -18   11.90   12.20
  13   7  -7   92.39   17.80
  13  -7  -7   56.79   18.10
  13  -7  -7   78.29   14.20
 -11   7   5   83.79   17.10
  11   7  -5   69.59    5.40
  11   7  -5   69.39    5.50
  11   7  -5   67.59   13.10
  11  -7  -5   64.59   14.50
  11  -7  -5   74.39   13.40
   9   7  -3    7.20    4.00
   9   7  -3   -1.70    4.90
   9   7  -3   13.20    7.00
   9   7  -3    5.80    5.40
  -9   7   3    7.10    9.00
   9  -7  -3   11.20    6.30
   9  -7  -3   -3.60    7.60
   7   7  -1  921.21   42.60
   7   7  -1  821.52   40.20
  -7   7   1  915.01   46.60
   7   7  -1  872.31   56.19
   7   7  -1  916.91   41.80
  -7   7   1  874.31   51.19
  -7  -7   1  872.51   44.40
   7  -7  -1  891.81   45.20
   7  -7  -1  955.90   47.30
  -5   7  -1   67.49   10.70
   5   7   1   62.29    7.80
   5   7   1   58.09   13.30
   5   7   1   68.79    6.80
  -5   7  -1   61.19   10.40
   5  -7   1   65.29   12.60
  -5  -7  -1   68.29    9.50
   5  -7   1   53.69    9.00
   5  -7   1   63.09   10.00
   3   7   3 3417.86  138.49
   3   7   3 3477.75  134.69
   3   7   3 3474.35  134.59
  -3   7  -3 3556.94  140.79
  -3  -7  -3 3380.86  147.59
   3  -7   3 3379.06  136.89
  -3  -7  -3 3441.86  138.79
   3  -7   3 3417.86  137.99
   3  -7   3 3389.66  142.79
   1   7   5  613.34   27.30
   1   7   5  636.04   36.10
   1   7   5  667.53   32.00
  -1   7  -5  656.63   32.00
  -1   7  -5  602.94   33.90
  -1  -7  -5  627.14   36.50
  -1  -7  -5  622.14   31.70
  -1  -7  -5  643.94   27.90
   1  -7   5  661.63   32.30
   1  -7   5  608.24   33.50
   1  -7   5  650.63   28.80
   1  -7   5  644.74   28.20
   1   7  -7  884.41   40.80
   1   7  -7  915.61   37.20
  -1   7   7  832.22   41.70
  -1   7   7  880.81   39.10
   1   7  -7  888.31   46.80
  -1   7   7  883.51   45.80
   1  -7  -7  902.71   42.30
   1  -7  -7  858.91   46.00
  -1  -7   7  932.11   41.00
  -1  -7   7  956.30   37.30
   1  -7  -7  892.71   39.20
   3   7  -9   47.60    6.30
  -3   7   9   47.10    7.20
  -3   7   9   34.90    7.60
   3   7  -9   40.10   13.00
   3   7  -9   48.90    6.10
   3  -7  -9   36.20    9.30
   3  -7  -9   33.40    6.70
  -3  -7   9   42.40    5.20
  -3  -7   9   34.40    5.40
   3  -7  -9   46.50    8.40
  -5   7  11   45.70   10.30
   5   7 -11   53.69    6.20
   5   7 -11   54.79    7.50
  -5   7  11   52.99    9.30
   5  -7 -11   33.20   10.30
   5  -7 -11   61.79    9.90
  -5  -7  11   55.49    6.10
   5  -7 -11   50.39    9.10
   7   7 -13  344.27   22.50
  -7   7  13  355.86   27.20
  -7   7  13  389.66   24.30
  -7  -7  13  350.26   23.00
   7  -7 -13  355.66   25.30
   7  -7 -13  366.56   23.80
   9   7 -15   23.00    8.20
  -9   7  15   41.50   10.80
  -9  -7  15   21.10    9.70
   9  -7 -15   42.80   11.00
   9  -7 -15   37.30    9.10
  11   7 -17  406.16   29.60
 -11   7  17  351.36   29.10
  11  -7 -17  364.56   25.50
  11  -7 -17  353.36   31.90
  12   8  -6    5.80    9.90
  12  -8  -6   -0.50   10.40
  12  -8  -6   -0.20    8.90
  10   8  -4   42.80   10.00
  10   8  -4   17.20    8.40
 -10   8   4   -4.00   10.60
  10   8  -4   28.80    7.20
  10   8  -4   24.00    5.20
  10  -8  -4   51.79   12.40
  10  -8  -4   31.50   10.20
  -8   8   2   27.00    7.70
   8   8  -2   12.80   10.00
   8   8  -2   19.70    6.30
  -8   8   2   14.90   10.30
   8   8  -2   18.60    6.90
   8   8  -2   22.40    9.80
   8  -8  -2   20.80    9.40
   8  -8  -2   16.30    6.90
   8  -8  -2   21.50   10.90
   6   8   0   20.30   10.10
  -6   8   0   57.19   11.60
   6   8   0   56.89    8.30
   6   8   0   38.10    6.50
   6   8   0   39.00    6.50
  -6   8   0   46.50    9.50
  -6  -8   0   45.20    8.90
   6  -8   0   56.39   10.90
   6  -8   0   22.00    8.50
   6  -8   0   32.80    8.60
  -4   8  -2   38.90    7.40
   4   8   2   56.19    6.00
  -4   8  -2   67.09   10.50
   4   8   2   39.00   11.70
   4   8   2   58.39    8.40
   4   8   2   58.69    6.20
   4  -8   2   54.19    9.10
   4  -8   2   46.40    9.80
   4  -8   2   41.70    7.80
  -4  -8  -2   57.69    9.40
  -2   8  -4   85.29   11.50
  -2   8  -4  101.39   13.50
   2   8   4   98.59    6.20
   2   8   4   90.39   14.60
   2   8   4   88.69   10.60
  -2  -8  -4   73.89   14.10
   2  -8   4   81.19    7.60
   2  -8   4   97.69   12.30
   2  -8   4  102.59   14.60
  -2  -8  -4  108.59   10.80
  -2  -8  -4  100.69    6.00
   2  -8   4  108.79    9.00
   0   8  -6   18.10    4.90
   0   8  -6   34.30    9.60
   0   8   6   11.50    5.00
   0   8   6   18.30    8.70
   0   8   6   18.70    3.70
   0  -8   6   10.60    4.60
   0  -8   6   19.30    3.60
   0  -8  -6   35.80   12.00
   0  -8   6   24.80    3.90
   0  -8  -6   15.30    3.80
   0  -8  -6   25.90    8.00
   0  -8   6   14.20    6.20
   2   8  -8  290.77   14.60
   2   8  -8  315.37   25.40
  -2   8   8  337.37   20.60
  -2   8   8  274.87   22.30
  -2   8   8  292.17   19.20
   2   8  -8  254.87   18.90
   2  -8  -8  281.87   23.20
   2  -8  -8  308.17   19.90
  -2  -8   8  297.37   14.00
  -2  -8   8  270.87   17.30
   2  -8  -8  299.97   17.40
  -4   8  10 1335.37   59.69
  -4   8  10 1278.77   59.99
   4   8 -10 1292.67   55.49
   4   8 -10 1321.17   54.99
   4   8 -10 1259.17   70.29
   4  -8 -10 1265.67   58.29
   4  -8 -10 1311.77   59.89
  -4  -8  10 1338.87   54.69
  -4  -8  10 1352.66   55.49
   4  -8 -10 1161.18   65.49
  -6   8  12  391.36   30.00
  -6   8  12  390.46   26.00
   6   8 -12  422.46   19.80
   6   8 -12  418.66   22.90
   6  -8 -12  396.46   25.50
  -6  -8  12  436.66   23.60
   6  -8 -12  396.16   26.00
  -6  -8  12  406.66   19.50
   6  -8 -12  312.47   30.50
   8   8 -14  314.97   22.10
  -8  -8  14  328.57   23.50
   8  -8 -14  300.27   22.70
   8  -8 -14  306.47   24.70
 -10   8  16   38.50   12.20
  10   8 -16   33.70   10.30
  10  -8 -16   15.40    8.00
  10  -8 -16   20.70   12.20
  12   8 -18    1.60    9.70
  12  -8 -18    9.70    8.80
  12  -8 -18   -9.20   12.20
  13   9  -7    3.50   11.90
  13   9  -7   15.40   23.50
  13  -9  -7   16.10    9.10
  13  -9  -7    4.30   11.70
  11   9  -5    0.60    8.00
  11   9  -5   21.70   20.30
  11   9  -5    0.20    3.80
  11   9  -5   -2.60    6.90
  11   9  -5   -0.30    3.40
  11  -9  -5  -15.50    9.30
  11  -9  -5    8.00   16.50
   9   9  -3   40.80   29.50
   9   9  -3   19.70    7.10
   9   9  -3   19.70   10.80
   9   9  -3   29.70    8.40
   9   9  -3   35.80    6.40
   9  -9  -3   37.40    9.90
   9  -9  -3   60.59   23.10
   7   9  -1   43.50   14.40
   7   9  -1   45.40    7.80
  -7   9   1   52.39   12.70
  -7   9   1   30.30    9.70
   7   9  -1   52.09    7.80
   7   9  -1   47.00    7.90
  -7  -9   1   40.50    9.60
   7  -9  -1   60.19   12.00
   7  -9  -1   44.50   13.10
   7  -9  -1   27.30    8.90
   5   9   1   25.80    4.70
  -5   9  -1   25.50    7.40
   5   9   1   21.90    4.40
  -5   9  -1   20.90    7.50
   5   9   1   23.10    6.00
   5   9   1    2.90    7.30
   5  -9   1   24.80    8.90
   5  -9   1   22.40    7.00
   5  -9   1    8.00    5.50
  -5  -9  -1   24.10    6.80
  -3   9  -3   61.69   11.80
   3   9   3   53.79    4.60
   3   9   3   74.39   10.20
   3   9   3   72.79   14.30
   3   9   3   55.59    5.30
  -3   9  -3   64.19   10.60
   3  -9   3   47.30    8.80
  -3  -9  -3   57.79   14.10
   3  -9   3   55.39   11.30
  -3  -9  -3   38.80    8.00
   3  -9   3   70.79    8.70
   3  -9   3   53.49    7.30
  -1   9  -5   48.60    8.50
  -1   9  -5   32.80    9.70
   1   9   5   37.50    4.30
   1   9   5   47.90   11.70
   1   9   5   43.50    8.00
   1  -9   5   38.40    8.20
   1  -9   5   53.79    6.00
  -1  -9  -5   43.20    5.10
  -1  -9  -5   23.50    6.60
  -1  -9  -5   39.20    9.70
   1  -9   5   32.20    9.90
   1  -9   5   41.70    5.70
  -1   9   7  213.68   20.20
  -1   9   7  216.28   16.20
  -1   9   7  196.38   12.90
   1   9  -7  215.78   15.60
   1   9  -7  235.18   24.20
  -1  -9   7  200.38   10.50
   1  -9  -7  182.48   12.70
   1  -9  -7  214.38   16.40
  -1  -9   7  212.38   15.40
  -1  -9   7  185.58   19.40
   1  -9  -7  206.68   20.70
  -1  -9   7  211.78   10.30
   3   9  -9  506.25   38.30
  -3   9   9  639.44   30.40
  -3   9   9  585.94   32.40
   3   9  -9  496.85   25.20
   3   9  -9  543.85   28.50
   3  -9  -9  542.75   28.70
   3  -9  -9  605.74   32.10
  -3  -9   9  545.65   28.30
   3  -9  -9  585.54   38.10
  -3  -9   9  567.34   24.60
  -5   9  11   50.79   10.50
  -5   9  11   73.39   12.00
   5   9 -11   55.99    7.60
   5   9 -11   53.49   14.50
   5   9 -11   58.49    8.00
  -5  -9  11   55.09    7.70
   5  -9 -11   73.99   16.30
  -5  -9  11   83.19    9.20
   5  -9 -11   49.10    9.70
   5  -9 -11   53.29    9.70
   7   9 -13  403.36   19.70
   7   9 -13  401.96   24.10
   7   9 -13  398.46   42.20
  -7   9  13  402.16   28.30
   7  -9 -13  463.05   29.30
  -7  -9  13  427.26   25.30
  -7  -9  13  414.96   19.40
   7  -9 -13  405.56   27.30
  -9   9  15   39.90   12.00
   9   9 -15   62.59   11.10
   9  -9 -15   43.70   10.30
   9  -9 -15   53.39   13.50
  11   9 -17   16.00   10.70
  11  -9 -17   11.30   12.00
  11  -9 -17   13.30    8.30
  12  10  -6  563.94   88.89
  12  10  -6  592.64   40.40
  12 -10  -6  472.55   39.00
  12 -10  -6  509.95   35.90
  10  10  -4    0.80    7.40
  10  10  -4  -11.70   15.90
  10  10  -4    1.30    7.30
  10  10  -4    8.50    7.30
  10 -10  -4    1.80    8.60
  10 -10  -4    9.30    9.90
   8  10  -2  394.36   23.70
   8  10  -2  407.46   50.99
   8  10  -2  421.76   23.90
   8 -10  -2  475.95   31.30
  -8 -10   2  409.26   28.20
   8 -10  -2  457.25   30.30
  -6  10   0   10.60    7.60
   6  10   0   21.00    4.50
  -6  10   0   18.20    9.50
   6  10   0    5.90   10.60
   6  10   0    6.10    3.80
   6  10   0    6.70    5.10
   6 -10   0    6.20    6.60
   6 -10   0   15.30    6.60
   6 -10   0   17.30   11.40
  -6 -10   0   16.10    7.00
   4  10   2   20.10    3.30
  -4  10  -2   18.50    7.90
   4  10   2   23.60    6.40
  -4  10  -2   14.20    6.10
   4  10   2   10.80    8.60
   4  10   2   17.70    3.50
   4 -10   2   19.90    5.80
   4 -10   2   21.70    7.40
  -4 -10  -2   27.30    7.50
   4 -10   2   16.50    7.90
   4 -10   2   22.90    8.50
  -2  10  -4   18.60    7.00
   2  10   4   16.30    6.10
  -2  10  -4   16.60    8.30
   2  10   4   13.00    2.10
   2  10   4   10.60    8.70
   2 -10   4   20.40    4.40
  -2 -10  -4   10.70    8.60
   2 -10   4   22.60    4.80
   2 -10   4   10.60    6.20
   2 -10   4    6.80    7.00
  -2 -10  -4   13.70    6.00
   0  10   6   43.10   11.00
   0  10  -6   53.19   10.00
   0  10   6   41.10    5.50
   0  10   6   28.60    7.60
   0  10  -6   75.09   14.40
   0 -10   6   38.50   10.70
   0 -10   6   46.00    5.40
   0 -10  -6   41.60   11.80
   0 -10  -6   48.70    9.10
   0 -10  -6   46.30    6.30
   0 -10   6   43.10    4.80
   0 -10   6   29.40    7.40
   2  10  -8 2333.27   97.29
   2  10  -8 2290.07   89.49
  -2  10   8 2396.66  106.29
  -2  10   8 2278.27   99.89
   2  10  -8 2357.76  108.39
  -2  10   8 2252.57   95.19
  -2 -10   8 2199.68   96.69
   2 -10  -8 2271.57  106.99
   2 -10  -8 2372.66   94.99
  -2 -10   8 2319.07   89.19
   2 -10  -8 2290.97   99.49
   4  10 -10    4.10    3.50
   4  10 -10   14.00    5.10
   4  10 -10    1.00    9.70
  -4  10  10   -0.80    7.50
  -4  10  10    2.40    5.20
   4 -10 -10   13.10    6.00
   4 -10 -10    4.50    8.30
  -4 -10  10   11.30    4.70
  -4 -10  10    2.20    2.70
   4 -10 -10   -4.10    4.60
   6  10 -12 1408.96   62.19
  -6  10  12 1456.95   69.89
  -6  10  12 1485.45   69.89
   6  10 -12 1472.25   85.59
   6  10 -12 1445.66   61.89
  -6 -10  12 1347.17   61.39
  -6 -10  12 1616.04   66.29
   6 -10 -12 1388.96   67.29
   6 -10 -12 1433.86   68.39
   8  10 -14    0.00    5.90
   8  10 -14    3.10   15.70
   8 -10 -14   14.10    8.90
   8 -10 -14   -0.80    6.70
  -8 -10  14    4.80    7.20
  10  10 -16   97.59   33.70
  10  10 -16  104.09   15.80
 -10 -10  16  125.39   18.40
  10 -10 -16  112.89   18.40
  11  11  -5   49.80   11.70
  11  11  -5   41.10    6.80
  11  11  -5   47.50   10.80
  11  11  -5   43.70    8.40
  11  11  -5   15.30   21.60
  11 -11  -5   43.30   12.00
  11 -11  -5   58.69   15.80
   9  11  -3   10.50    6.60
   9  11  -3   20.00   13.60
   9  11  -3    6.00    5.70
   9  11  -3   18.80    5.90
   9  11  -3   11.30   11.40
   9 -11  -3    0.10    8.00
   9 -11  -3   17.80   10.50
   7  11  -1   -4.30   11.60
   7  11  -1    4.00    3.60
   7  11  -1    3.80    3.70
   7  11  -1   -1.10    4.90
  -7  11   1    5.90    8.00
   7 -11  -1   -7.30    6.70
  -7 -11   1    2.10    7.10
   7 -11  -1    6.70    7.20
  -5  11  -1  141.39   18.70
   5  11   1  130.79   24.10
  -5  11  -1  133.09   15.90
   5  11   1  147.19   14.20
   5  11   1  130.59    8.80
   5  11   1  146.49    8.10
   5 -11   1  143.69   18.10
  -5 -11  -1  140.39   16.00
   5 -11   1  119.09   13.40
   5 -11   1  124.79   14.20
   3  11   3   99.29   12.90
  -3  11  -3   83.99   19.40
  -3  11  -3  103.89   16.40
   3  11   3   96.59   18.30
  -3 -11  -3  113.59   14.40
   3 -11   3  149.19   20.60
   3 -11   3  106.89    9.80
   3 -11   3  112.99   10.80
   3 -11   3  114.19   14.90
  -1  11  -5   22.30    7.90
   1  11   5   17.20    9.10
   1  11   5   17.10    6.60
  -1  11  -5   19.70   10.30
   1  11   5   16.80    3.10
  -1 -11  -5   17.60    9.40
   1 -11   5   16.60    3.60
   1 -11   5   15.60    8.20
  -1 -11  -5   13.20    7.00
   1 -11   5   17.40    4.10
   1 -11   5   15.80    7.00
  -1 -11  -5   16.30    3.10
   1  11  -7  446.86   35.30
   1  11  -7  439.96   28.20
  -1  11   7  512.95   25.00
  -1  11   7  475.95   34.70
  -1  11   7  552.04   31.10
   1 -11  -7  453.85   35.00
   1 -11  -7  491.65   24.50
  -1 -11   7  436.76   33.40
  -1 -11   7  509.75   28.80
   1 -11  -7  519.45   30.30
   3  11  -9  187.08   27.90
  -3  11   9  171.88   17.30
   3  11  -9  167.38    7.70
  -3  11   9  167.28   14.60
   3  11  -9  165.68   14.50
   3 -11  -9  159.08   16.20
   3 -11  -9  186.18   14.40
   3 -11  -9  175.48   24.20
  -3 -11   9  160.98   14.60
   5  11 -11  255.67   34.90
  -5  11  11  326.77   25.70
   5  11 -11  307.17   19.50
  -5  11  11  324.07   23.30
   5  11 -11  303.47   17.60
  -5 -11  11  303.87   19.70
  -5 -11  11  307.27   16.40
   5 -11 -11  286.27   23.50
   5 -11 -11  319.97   22.10
   7  11 -13   89.99   24.90
   7  11 -13  135.79   13.60
   7  11 -13  125.19   10.90
   7 -11 -13  163.78   19.50
  -7 -11  13  129.99   13.70
  -7 -11  13  157.18   12.10
   7 -11 -13  118.79   16.60
   9  11 -15   19.10    8.60
   9  11 -15    3.90   20.30
   9 -11 -15    5.70    8.80
   9 -11 -15   -3.60    7.70
  -9 -11  15   -6.60    8.70
  11  11 -17   24.00   10.30
  11  11 -17   10.40   23.40
  11 -11 -17   11.30   10.50
  11 -11 -17    5.30   15.10
  10  12  -4   33.60    8.20
  10  12  -4    9.20   16.60
  10  12  -4   18.10    9.20
  10  12  -4   29.90    8.40
  10  12  -4   23.80   15.80
  10 -12  -4   38.30   11.50
  10 -12  -4   20.40    9.50
   8  12  -2    7.80   16.10
   8  12  -2    6.70    5.00
   8  12  -2    2.10    6.60
   8 -12  -2   -0.50    7.90
   8 -12  -2    4.10    7.10
  -8 -12   2   -7.70    7.30
   6  12   0  141.09    9.50
   6  12   0  142.19    8.50
  -6  12   0  124.89   19.80
   6  12   0  140.39   26.30
   6  12   0  159.38   15.20
   6 -12   0  148.99   17.10
  -6 -12   0  140.19   16.30
   6 -12   0   91.99   21.50
   6 -12   0  126.49   17.90
   4  12   2   89.69   12.80
   4  12   2   65.99   15.70
  -4  12  -2   58.39   12.10
   4 -12   2   76.09   13.60
   4 -12   2   86.49   11.20
   4 -12   2   67.99   14.50
  -4 -12  -2   86.09   13.30
   4 -12   2   77.49    9.90
  -2  12  -4  168.38   21.50
  -2  12  -4  146.49   17.70
   2  12   4  180.98   16.90
   2  12   4  168.68   23.00
   2 -12   4  170.38   12.20
   2 -12   4  114.39   18.20
  -2 -12  -4  156.38   16.10
   2 -12   4  172.28   11.60
   2 -12   4  165.38   16.80
  -2 -12  -4  132.39   22.70
   0  12  -6  427.46   35.50
   0  12  -6  428.96   30.30
   0  12   6  571.34   32.50
   0  12   6  494.45   24.10
   0  12   6  581.34   39.10
   0 -12  -6  552.54   25.10
   0 -12   6  534.45   31.50
   0 -12   6  533.95   22.70
   0 -12  -6  559.04   32.50
   0 -12   6  511.65   36.50
   0 -12   6  523.05   22.10
   0 -12  -6  501.15   38.30
   2  12  -8   50.29   14.90
   2  12  -8   50.69   10.30
  -2  12   8   47.50    7.80
  -2  12   8   53.39   11.30
  -2  12   8   36.40   12.60
  -2 -12   8   40.10    8.90
   2 -12  -8   59.19   11.80
   2 -12  -8   58.19   14.00
   2 -12  -8   42.90    7.10
   4  12 -10  268.97   32.40
  -4  12  10  230.38   19.70
   4  12 -10  248.68   18.70
   4 -12 -10  255.37   19.00
   4 -12 -10  255.57   21.90
  -4 -12  10  275.17   19.40
   6  12 -12  188.18   14.80
  -6  12  12  209.88   20.70
   6  12 -12  149.88   12.60
   6  12 -12  248.48   59.99
  -6 -12  12  173.68   12.40
  -6 -12  12  159.58   14.50
   6 -12 -12  208.58   22.70
   6 -12 -12  144.29   17.30
   8  12 -14    5.80   18.30
   8  12 -14   -5.00    5.00
   8  12 -14    2.70    5.80
   8 -12 -14    2.40    7.80
  -8 -12  14    3.80    5.00
  -8 -12  14   -3.80    6.80
   8 -12 -14    1.80    8.90
  10  12 -16   -8.40    7.50
  10  12 -16  -29.00   19.60
  10 -12 -16   -8.00   11.10
  10 -12 -16    7.80    9.70
 -10 -12  16   -2.40   13.20
  11  13  -5   39.10   10.00
  11  13  -5   18.50   11.20
  11  13  -5   64.69   28.10
  11 -13  -5   42.30   15.10
  11 -13  -5   31.60   13.40
   9  13  -3   16.90   20.20
   9  13  -3   23.40    7.00
   9  13  -3   18.30    9.00
   9  13  -3   20.30    6.90
   9 -13  -3   32.10   12.00
   9 -13  -3   29.10   11.30
  -9 -13   3    3.70   10.10
   7  13  -1  239.48   20.70
   7  13  -1  227.28   32.50
   7  13  -1  246.38   12.90
   7  13  -1  268.77   14.00
   7 -13  -1  302.57   23.50
  -7 -13   1  248.88   21.80
   7 -13  -1  228.48   23.90
   5  13   1   12.00   12.10
   5 -13   1    0.30    5.30
   5 -13   1   10.20    7.20
   5 -13   1    4.10    6.80
  -5 -13  -1   -5.20    5.50
  -3  13  -3  104.59   19.00
   3  13   3   82.99   13.90
   3  13   3   68.59   19.20
   3 -13   3  101.69   10.70
   3 -13   3  103.69   20.10
   3 -13   3   76.79    9.90
  -3 -13  -3   97.79   14.20
   3 -13   3   61.79   12.30
  -1  13  -5  129.19   20.10
   1  13   5   93.09   14.30
   1  13   5   80.09   17.70
  -1  13  -5   96.29   14.20
   1 -13   5   90.79   14.20
  -1 -13  -5   63.49   18.00
  -1 -13  -5   94.19   13.40
   1 -13   5  101.69    8.10
   1 -13   5   67.09   17.70
   1 -13   5   99.29    7.80
  -1  13   7  219.28   27.40
   1  13  -7  252.97   24.80
   1  13  -7  310.47   30.20
  -1  13   7  235.28   21.90
  -1  13   7  226.88   14.70
   1 -13  -7  207.28   14.50
  -1 -13   7  226.28   27.90
   1 -13  -7  165.18   24.00
  -1 -13   7  259.77   20.20
   1 -13  -7  252.87   21.50
   3  13  -9   53.49   16.50
   3  13  -9   69.39   11.60
  -3  13   9   60.79    9.30
   3 -13  -9   38.20   11.00
   3 -13  -9   73.49   10.00
  -3 -13   9   43.00    9.30
   5  13 -11   82.29   12.10
   5  13 -11  107.49   24.70
  -5  13  11   96.49   15.30
   5 -13 -11   89.09   13.00
  -5 -13  11   90.29   12.70
   7  13 -13  402.46   24.30
   7  13 -13  273.87   41.70
   7  13 -13  375.76   22.40
  -7 -13  13  441.06   22.00
  -7 -13  13  409.36   24.60
   7 -13 -13  449.06   31.60
   9  13 -15   48.70   10.90
   9  13 -15   38.10   26.40
  -9 -13  15   37.10   11.80
   9 -13 -15   33.10   13.00
   9 -13 -15   38.10   11.90
  10  14  -4   15.00   14.80
  10  14  -4  -25.00   17.30
  10  14  -4   20.00    6.90
  10 -14  -4    6.30   11.60
  10 -14  -4    8.90    9.80
   8  14  -2   26.50    4.80
   8  14  -2   48.20   22.60
   8  14  -2   30.40    4.10
   8  14  -2   11.60   16.20
   8 -14  -2   38.30   11.90
  -8 -14   2   14.90    9.60
   8 -14  -2   15.70   10.00
   6  14   0   27.00   10.30
   6  14   0   54.99   18.10
   6 -14   0   19.00   10.20
  -6 -14   0   35.80   10.60
   6 -14   0   37.20   10.00
   6 -14   0   38.20   10.80
   4  14   2   10.30    8.90
   4 -14   2   19.20   15.40
   4 -14   2    8.30    5.70
   4 -14   2    4.30    5.80
  -4 -14  -2   17.60    8.10
   2  14   4  202.38   29.10
   2  14   4  239.58   22.10
  -2  14  -4  160.18   23.50
   2 -14   4  222.38   14.30
   2 -14   4  203.18   13.80
   2 -14   4  239.38   21.50
   2 -14   4  230.48   29.10
  -2 -14  -4  270.67   21.70
   0  14   6  221.18   12.50
   0  14  -6  226.28   21.40
   0  14  -6  257.57   31.20
   0  14   6  198.28   26.40
   0 -14   6  194.28   26.70
   0 -14   6  232.58   20.60
   0 -14  -6  221.88   12.80
   0 -14  -6  211.58   20.60
   2  14  -8   71.49   18.60
  -2  14   8   65.29    9.70
  -2  14   8   50.09   15.80
   2  14  -8   29.70    9.50
   2 -14  -8   39.70    7.60
  -2 -14   8   59.79   12.10
   2 -14  -8   48.70   12.40
   4  14 -10    8.20   14.80
  -4  14  10    9.20    7.60
   4  14 -10   10.90    8.00
  -4 -14  10   11.60    7.60
   4 -14 -10   16.30    9.40
   4 -14 -10   15.90    7.40
   6  14 -12   50.19   22.50
   6  14 -12   63.19   11.30
   6 -14 -12   44.90   12.30
   6 -14 -12   69.59   13.10
  -6 -14  12   56.89   10.60
   8  14 -14   19.80    5.20
   8  14 -14   13.40    6.80
   8  14 -14    9.70    7.90
   8  14 -14  -16.30   19.10
   8 -14 -14   24.60   10.10
  -8 -14  14    9.90    7.50
   8 -14 -14    8.90    9.10
   9  15  -3  114.99   33.90
   9  15  -3   31.40   11.70
   9 -15  -3   51.49   14.00
   9 -15  -3   68.59   17.10
  -9 -15   3   81.89   15.90
   7  15  -1    0.70   16.20
   7  15  -1    8.10   10.10
  -7 -15   1    2.80    9.10
   7 -15  -1   14.20   11.30
   7 -15  -1    2.10    8.40
   5  15   1  949.01   67.99
  -5 -15  -1 1048.10   54.79
   5 -15   1 1007.20   50.29
   5 -15   1 1085.79   57.79
   5 -15   1 1027.20   49.90
  -3  15  -3   44.60   15.20
   3  15   3   28.00   15.20
   3 -15   3   56.59   12.80
   3 -15   3   47.80    8.20
   3 -15   3   60.69    9.10
  -3 -15  -3   34.70   10.10
  -1  15  -5  162.58   25.90
   1  15   5  100.29   34.50
   1 -15   5   99.19    7.30
  -1 -15  -5  110.49   16.10
   1 -15   5  108.29    8.10
   1 -15   5  101.59   15.90
  -1  15   7   38.50   15.30
  -1  15   7   31.20    6.20
   1  15  -7   32.40   11.70
  -1 -15   7   25.80    9.00
   1 -15  -7   32.90    6.90
   1 -15  -7   31.00    9.80
  -3  15   9   18.40    8.40
   3  15  -9   19.50    9.60
  -3 -15   9   14.00    8.30
   3 -15  -9   29.20   10.40
   3 -15  -9   27.40    8.00
   5  15 -11   53.99   21.50
  -5  15  11   42.10   12.70
   5  15 -11   87.09   12.80
   5 -15 -11   73.89   15.90
   5 -15 -11   78.19   13.80
  -5 -15  11   69.99   13.20
   7  15 -13    7.10   17.70
   7  15 -13    2.60    9.30
   7 -15 -13    8.20    8.80
   7 -15 -13   -2.50   10.00
  -7 -15  13    7.40    6.70
   9  15 -15    7.70   27.60
   9 -15 -15   38.30   15.10
   9 -15 -15   35.90   14.70
  -9 -15  15   49.60   10.10
   8  16  -2   25.20   21.30
  -8 -16   2   10.80   12.10
   8 -16  -2   31.10   11.90
   8 -16  -2   12.30   12.50
   6  16   0  376.26   48.20
   6 -16   0  387.76   28.00
   6 -16   0  408.36   27.80
  -6 -16   0  384.36   30.40
   6 -16   0  397.46   33.00
   4  16   2  223.38   34.40
   4 -16   2  250.87   18.20
   4 -16   2  190.58   23.60
  -4 -16  -2  206.98   21.50
   4 -16   2  248.18   18.30
   2  16   4   59.69   19.00
   2 -16   4   99.99    9.40
   2 -16   4  105.79    9.90
  -2 -16  -4  114.39   17.40
   2 -16   4  117.29   19.20
   0  16   6   -3.20   12.40
   0 -16   6    7.60    8.20
   0 -16  -6   17.10   10.10
   2  16  -8   52.39   18.60
  -2  16   8   29.80    7.50
  -2  16   8   58.69   20.10
   2 -16  -8   39.30    8.30
   2 -16  -8   36.80   11.50
  -2 -16   8   43.50   11.80
  -4  16  10   42.00   10.60
   4  16 -10   47.60   19.40
   4 -16 -10   74.19   12.70
  -4 -16  10   56.49   12.30
   4 -16 -10   54.79   14.40
   6  16 -12   -0.90   10.00
   6  16 -12   32.70   22.50
  -6 -16  12    6.70    8.90
   6 -16 -12   -3.40    9.30
   6 -16 -12   -2.90    8.90
   8  16 -14  -20.10   25.50
   8 -16 -14  -17.90    9.90
  -8 -16  14    7.40    9.50
   8 -16 -14    3.00   10.90
   7  17  -1  -13.60   18.60
   7 -17  -1   15.10   11.40
  -7 -17   1    9.90   11.80
   5  17   1   36.50   21.30
   5 -17   1   22.30   14.50
  -5 -17  -1   30.90   11.40
   5 -17   1   30.00   12.50
   5 -17   1   31.00    9.60
   3  17   3  -11.10   13.20
  -3  17  -3   27.40   13.70
   3 -17   3    1.30    5.80
   3 -17   3   19.10   10.10
   3 -17   3    4.10    5.70
  -3 -17  -3   -2.90    7.50
   1  17   5    5.40   14.00
  -1  17  -5   41.90   18.50
  -1 -17  -5    7.20    9.70
   1 -17   5   33.00   11.60
  -1  17   7   21.80   14.40
   1  17  -7  -10.70   12.90
   1 -17  -7   14.00    9.00
   1 -17  -7    3.80    5.10
   1 -17  -7   11.00    4.20
  -1 -17   7    7.10    8.30
  -3  17   9   15.90    9.30
   3  17  -9   -6.20   13.50
  -3 -17   9   -1.60   11.30
   3 -17  -9    3.40    7.00
   3 -17  -9  -12.50    8.50
   5  17 -11   29.00   24.00
  -5  17  11   21.40   14.70
  -5 -17  11   26.90   11.30
   5 -17 -11   49.80   16.00
   5 -17 -11   39.60   11.40
  -7 -17  13    9.20    9.90
   7 -17 -13    3.10   12.50
   6 -18   0   57.49   28.30
   6 -18   0   60.59   13.30
  -6 -18   0   69.09   15.90
   4  18   2   11.70   19.60
   4 -18   2    5.30    7.80
  -4 -18  -2   -1.40    9.20
   4 -18   2   12.00    7.20
   4 -18   2   11.80   12.00
  -2  18  -4   31.30   18.50
   2  18   4   44.90   18.40
   2 -18   4   13.00   11.50
   2 -18   4   20.70    4.10
   2 -18   4   12.30    5.00
  -2 -18  -4   12.60   11.80
   0  18  -6  309.17   40.20
   0  18   6  249.28   35.80
   0 -18   6  283.17   27.10
   0 -18  -6  296.87   27.60
   2  18  -8  -19.50   14.10
  -2  18   8    4.50   13.80
  -2  18   8    9.50    7.70
   2 -18  -8   19.70   11.00
  -2 -18   8   24.00   10.60
   2 -18  -8   21.10    8.00
   2 -18  -8   16.40    6.20
   4  18 -10  619.54   58.59
   4 -18 -10  671.73   36.60
   4 -18 -10  621.64   44.30
  -4 -18  10  568.04   39.60
  -6 -18  12    9.40   10.50
   6 -18 -12   14.90   12.80
   6 -18 -12   13.00   10.90
   5  19   1    6.40   21.00
  -5 -19  -1   28.20   11.50
   5 -19   1   -7.90   11.60
   5 -19   1    1.70   12.70
   5 -19   1    3.20    8.50
   3  19   3    5.40   15.30
  -3 -19  -3   -3.80   11.30
   3 -19   3   10.40    6.40
   3 -19   3  -13.30   10.20
  -1  19  -5   49.80   22.60
   1  19   5   20.10   16.80
   1 -19   5   20.70   11.20
  -1 -19  -5   36.40   14.30
  -1  19   7   63.99   18.90
   1  19  -7  103.19   26.80
   1 -19  -7   56.09   15.40
  -1 -19   7  114.99   21.50
  -3  19   9  239.28   21.00
   3  19  -9  214.18   38.80
   3 -19  -9  245.78   19.80
  -3 -19   9  182.88   23.50
   3 -19  -9  226.68   30.50
   3 -19  -9  200.58   18.40
   5  19 -11  -25.50   24.00
   5 -19 -11   36.50   14.80
  -5 -19  11   15.00   13.00
   5 -19 -11   11.40   10.20
   4  20   2   -4.10   20.20
   4 -20   2    3.80   12.30
   4 -20   2   12.80   11.70
  -4 -20  -2   -2.50   12.20
   2  20   4    0.60   18.60
  -2  20  -4   21.10   18.40
  -2 -20  -4  -16.30   10.90
   0  20  -6    6.60   18.30
   0  20   6   52.79   33.10
   0 -20  -6    1.10   11.80
   0 -20   6  -12.80   10.90
  -2  20   8   21.60   20.20
   2  20  -8   -3.10   22.60
   2 -20  -8   50.99    7.30
  -2 -20   8   37.00   13.90
   2 -20  -8   53.79   16.10
  14   0  -7    0.10    4.70
  12   0  -5    4.30    4.90
  12   0  -5   21.80   12.30
  12   0  -5    3.10    7.20
  10   0  -3   17.00    9.10
  10   0  -3   -1.30    6.90
  10   0  -3    5.30    4.90
  -8   0   1   19.40    8.20
  -8   0   1    7.10    6.50
   8   0  -1   11.10    4.30
   8   0  -1   34.90    8.70
   6   0   1    4.50    4.60
  -6   0  -1   -6.20    3.60
  -6   0  -1   15.80    5.00
   6   0   1   -0.50    3.30
   4   0   3   -0.80    1.80
  -4   0  -3    0.60    3.10
   4   0   3   -1.20    2.60
   4   0   3    0.80    2.80
  -4   0  -3    0.60    2.80
   2   0   5    0.00    2.60
   2   0   5    1.20    1.70
  -2   0  -5    3.80    2.00
  -2   0  -5    2.10    3.00
   0   0   7    2.70    2.40
   0   0   7    4.50    2.30
   0   0  -7    2.10    2.20
   0   0   7    2.50    3.10
   2   0  -9    0.30    1.70
  -2   0   9    1.20    2.30
  -2   0   9   -1.30    1.50
   2   0  -9   -0.30    2.00
   4   0 -11   11.40    2.70
   4   0 -11   13.70    4.50
  -4   0  11    5.40    1.90
  -4   0  11    8.30    3.70
   6   0 -13   10.00    2.60
   6   0 -13    3.30    4.80
  -6   0  13    7.40    2.40
  -6   0  13    7.40    6.00
  -8   0  15   15.10    8.30
   8   0 -15   17.50    7.50
  10   0 -17    5.40    7.80
  12   0 -19  -12.60    9.50
  13   1  -6   89.59    9.10
  13   1  -6   95.39   18.00
  13   1  -6   73.29    7.90
  13  -1  -6   94.59   13.60
  13  -1  -6   77.19   18.00
 -11   1   4   48.60   13.70
  11   1  -4   33.80   12.60
  11   1  -4   48.30    7.60
  11  -1  -4   46.30   11.80
  -9   1   2  818.42   47.90
   9   1  -2  934.91   48.30
   9   1  -2  926.41   41.80
   9   1  -2  861.21   45.50
  -9   1   2  982.50   48.70
   9  -1  -2  899.61   42.70
  -9  -1   2  927.31   48.90
   9  -1  -2  890.31   48.10
   7   1   0   59.89    8.30
  -7   1   0   52.39   10.60
   7   1   0   39.30    9.30
   7   1   0   65.89   10.30
  -7  -1   0   56.09    9.80
   7  -1   0   70.09   11.10
   7  -1   0   75.69    9.30
  -5   1  -2 1292.27   57.09
   5   1   2 1280.27   56.19
  -5   1  -2 1197.48   56.39
   5   1   2 1192.98   57.49
   5   1   2 1209.38   55.99
  -5  -1  -2 1246.58   59.19
   5  -1   2 1357.06   57.29
  -5  -1  -2 1333.17   56.59
   5  -1   2 1295.27   55.39
  -3   1  -4   71.19    8.50
   3   1   4   73.79    7.20
   3   1   4   76.89   10.70
   3   1   4   69.99    6.00
   3   1   4   59.49    8.90
   3  -1   4   63.09    6.00
   3  -1   4   78.39    9.20
   3  -1   4   49.30    6.70
  -1   1  -6   13.00    4.00
   1   1   6   11.00    2.70
   1   1   6    7.40    3.10
  -1   1  -6    5.30    2.40
   1   1   6    7.70    2.30
   1  -1   6   12.50    2.80
  -1  -1  -6    8.60    2.80
  -1  -1  -6    5.00    2.40
   1  -1   6   12.20    4.00
  -1  -1  -6    9.50    2.40
   1   1  -8   13.30    3.20
  -1   1   8    8.90    2.90
   1   1  -8   18.90    4.90
  -1   1   8   14.60    3.00
  -1  -1   8   10.10    3.40
   1  -1  -8    7.80    2.50
  -1  -1   8   12.90    3.40
  -1  -1   8   15.20    3.50
   1  -1  -8    8.60    2.90
  -3   1  10 1036.90   43.30
  -3   1  10 1067.49   46.40
   3   1 -10 1130.39   46.20
  -3  -1  10 1013.10   45.60
  -3  -1  10  980.70   43.90
   3  -1 -10 1024.40   43.40
   3  -1 -10 1027.30   45.90
  -3  -1  10 1058.49   42.00
  -5   1  12  245.18   13.10
   5   1 -12  252.47   18.90
  -5   1  12  230.78   17.70
  -5  -1  12  256.67   11.80
   5  -1 -12  258.87   13.50
   5  -1 -12  270.47   17.90
  -5  -1  12  251.67   17.40
  -5  -1  12  248.38   10.80
  -7   1  14  105.19   15.20
  -7   1  14   97.79    7.30
   7   1 -14   77.59   11.90
  -7  -1  14   75.09   12.80
   7  -1 -14   80.19   12.50
   7  -1 -14   80.39    7.10
  -9   1  16  312.27   15.60
   9   1 -16  283.77   23.70
   9  -1 -16  287.57   14.90
   9  -1 -16  336.07   25.10
  11   1 -18   26.20   11.40
  11  -1 -18   29.60   11.00
  13  -1 -20   40.90   15.40
  14   2  -7    7.50   10.90
  14  -2  -7   19.10   13.20
  14  -2  -7    2.90    6.80
 -12   2   5  242.68   25.60
  12   2  -5  182.98   12.70
  12   2  -5  208.38   13.80
  12   2  -5  216.18   24.60
  12  -2  -5  167.58   22.50
  12  -2  -5  208.08   16.70
  10   2  -3    8.40    4.50
  10   2  -3   15.90    5.60
  10   2  -3   13.10    8.50
 -10   2   3    5.70    8.80
  10  -2  -3   15.50    6.20
  10  -2  -3   14.40    8.00
   8   2  -1    2.00    5.10
  -8   2   1    5.50    6.90
  -8   2   1    2.70    5.20
   8   2  -1    3.40    3.80
   8   2  -1    1.80    5.50
   8  -2  -1    2.60    3.30
   8  -2  -1    3.80    5.80
  -8  -2   1   -1.70    5.60
   6   2   1   22.20    6.10
   6   2   1   17.00    5.50
  -6   2  -1   18.00    5.70
   6   2   1   22.70    6.10
   6  -2   1   23.70    7.00
  -6  -2  -1   29.90    7.10
   6  -2   1   15.70    4.80
   4   2   3  471.65   22.60
   4   2   3  464.55   24.80
  -4   2  -3  430.36   24.30
  -4   2  -3  449.95   24.20
   4   2   3  448.96   23.60
   4   2   3  503.75   28.00
   4  -2   3  478.05   24.80
   4  -2   3  434.46   23.70
   2   2   5  140.69   11.10
  -2   2  -5  169.98   10.20
   2   2   5  161.38   11.30
  -2   2  -5  171.88   11.40
  -2  -2  -5  180.08   11.90
   2  -2   5  149.99   11.00
  -2  -2  -5  177.58    9.90
   2  -2   5  168.18   10.00
   0   2   7 1008.20   41.60
   0   2  -7  936.41   40.00
   0   2   7  963.80   41.40
   0   2  -7  951.60   41.10
   0   2  -7  965.60   41.80
   0   2   7  973.20   41.20
   0  -2  -7  995.60   41.40
   0  -2  -7  939.21   41.20
   0  -2   7  950.00   41.10
   0  -2  -7  983.80   41.70
   0  -2   7  950.80   41.60
   2   2  -9   93.39    7.70
  -2   2   9   85.19    7.60
  -2   2   9   79.39    6.50
   2   2  -9   91.99    7.40
   2  -2  -9  100.19    8.10
  -2  -2   9   78.39    6.00
  -2  -2   9   78.29    7.00
   2  -2  -9   69.99    6.50
  -4   2  11  432.86   20.90
  -4   2  11  420.86   24.00
   4   2 -11  411.26   22.80
   4  -2 -11  463.25   24.00
  -4  -2  11  446.26   17.60
  -4  -2  11  429.76   17.50
   4  -2 -11  424.86   21.10
  -4  -2  11  434.96   23.20
  -6   2  13   25.90    7.70
   6   2 -13    5.20    5.40
  -6   2  13   13.90    3.70
   6  -2 -13   14.10    4.10
  -6  -2  13    6.80    5.10
   6  -2 -13    6.10    5.10
  -8   2  15   37.40   11.10
   8   2 -15   28.20    8.40
  -8   2  15   28.30    5.90
  -8  -2  15   31.60    9.00
   8  -2 -15   38.00    6.00
   8  -2 -15   14.60    7.40
 -10   2  17   67.29    9.10
  10   2 -17   75.09   13.70
  10  -2 -17   60.99   13.10
  10  -2 -17   84.49    8.30
  12   2 -19    9.90   10.00
  12  -2 -19    0.50   11.30
  13   3  -6  143.49   21.70
 -13   3   6  186.38   26.40
  13  -3  -6  156.18   16.50
  13  -3  -6  146.19   21.90
  11   3  -4   17.80    8.30
 -11   3   4   -9.70   10.20
  11   3  -4    5.10    4.20
  11   3  -4    7.70    4.20
  11  -3  -4   -1.50    7.00
  11  -3  -4    3.80    5.20
  -9   3   2    4.70    8.70
   9   3  -2    5.10    6.40
   9   3  -2   10.00    4.70
  -9   3   2    2.20    6.30
   9   3  -2    0.50    3.70
  -9  -3   2    0.80    8.20
   9  -3  -2   21.50    8.60
   9  -3  -2    8.60    4.50
   7   3   0  168.98   14.90
   7   3   0  148.49   13.10
   7   3   0  150.28   12.60
  -7   3   0  140.69   13.90
  -7   3   0  181.78   16.20
   7  -3   0  172.78   13.90
  -7  -3   0  148.49   14.10
   7  -3   0  168.38   16.00
   5   3   2  220.68   14.50
  -5   3  -2  180.18   14.60
   5   3   2  202.38   13.80
   5   3   2  207.08   13.40
   5   3   2  219.38   17.70
   5  -3   2  192.58   14.10
   5  -3   2  198.48   15.30
  -3   3  -4  979.00   43.40
   3   3   4  945.21   41.70
   3   3   4  932.01   45.80
   3   3   4  954.20   42.50
   3   3   4  995.10   40.90
   3  -3   4  918.91   42.90
   3  -3   4  983.00   43.10
  -3  -3  -4  965.00   40.70
   3  -3   4  940.91   41.60
  -3  -3  -4  972.60   43.50
   1   3   6  173.08   11.30
  -1   3  -6  183.98   10.50
  -1   3  -6  178.48   10.00
   1   3   6  173.38   12.20
  -1   3  -6  195.38   11.80
   1   3   6  170.98   10.80
  -1  -3  -6  195.98   11.70
   1  -3   6  168.38   10.00
  -1  -3  -6  163.68   12.40
   1  -3   6  183.68   11.70
   1  -3   6  194.78   10.60
  -1  -3  -6  183.48   10.70
  -1   3   8    1.80    2.00
   1   3  -8    7.40    2.80
   1   3  -8    6.90    2.60
  -1   3   8    6.80    2.70
   1  -3  -8   -0.60    2.50
   1  -3  -8   11.60    3.50
   1  -3  -8    7.30    2.80
  -1  -3   8    0.00    1.70
  -1  -3   8    5.00    2.60
   3   3 -10   14.90    4.20
  -3   3  10   10.60    4.00
  -3   3  10   14.30    3.60
   3   3 -10   20.00    4.10
   3  -3 -10   13.90    3.80
  -3  -3  10   16.60    2.70
  -3  -3  10   12.10    3.60
   3  -3 -10   15.10    4.50
   5   3 -12  303.57   18.70
  -5   3  12  293.97   16.70
  -5   3  12  292.87   20.40
   5  -3 -12  306.97   19.80
  -5  -3  12  277.27   18.70
   5  -3 -12  310.27   17.00
   7   3 -14  323.47   21.80
  -7   3  14  306.67   18.00
  -7   3  14  297.77   23.90
   7  -3 -14  306.97   17.70
   7  -3 -14  299.67   22.50
  -7  -3  14  322.67   22.70
  -9   3  16   15.60    5.40
   9   3 -16   13.10    7.50
   9  -3 -16    3.90    6.70
   9  -3 -16   13.40    4.90
  11   3 -18   36.80   10.80
 -11   3  18   28.30    8.20
  11  -3 -18   38.70   12.10
  11  -3 -18   26.00    6.00
  13   3 -20   12.90   12.60
  13  -3 -20   21.50   14.10
  14   4  -7   89.29   19.20
  14  -4  -7   71.99   18.80
  14  -4  -7   85.49   13.20
  12   4  -5   36.30    4.30
  12   4  -5   42.10    4.60
  12   4  -5   30.30   11.60
 -12   4   5    2.10   12.40
  12  -4  -5   40.30    9.90
  12  -4  -5   27.00   11.90
 -10   4   3   41.30   12.00
  10   4  -3   46.20   11.00
  10   4  -3   34.50    6.20
  10   4  -3   47.30    7.30
  10  -4  -3   37.80    9.50
 -10  -4   3   20.80   10.40
   8   4  -1   21.90    6.10
   8   4  -1   21.60    7.90
   8   4  -1   15.20    4.60
  -8   4   1   18.60    8.20
  -8   4   1   39.20    8.50
  -8  -4   1   16.60    7.50
   8  -4  -1   35.90    7.90
   8  -4  -1    3.00    6.60
  -6   4  -1  312.47   21.00
   6   4   1  309.97   17.80
  -6   4  -1  267.67   18.90
   6   4   1  234.58   20.40
   6   4   1  292.77   17.00
   6   4   1  271.67   18.10
   6  -4   1  296.57   19.10
   6  -4   1  290.17   20.20
  -4   4  -3  306.67   20.40
  -4   4  -3  361.96   20.80
   4   4   3  322.97   17.90
   4   4   3  364.86   19.20
   4   4   3  355.56   19.30
   4   4   3  408.86   26.00
   4  -4   3  400.76   21.40
   4  -4   3  348.17   20.40
  -4  -4  -3  361.26   20.80
   2   4   5 1811.12   71.69
  -2   4  -5 1848.12   74.39
   2   4   5 1661.73   76.29
   2   4   5 1676.03   73.19
   2  -4   5 1733.13   73.19
   2  -4   5 1862.21   72.29
   2  -4   5 1797.32   73.09
  -2  -4  -5 1828.02   71.19
  -2  -4  -5 1754.32   77.59
   2  -4   5 1782.82   74.09
  -2  -4  -5 1721.43   73.39
   0   4   7 4912.11  186.18
   0   4   7 4489.95  184.08
   0   4  -7 4691.93  185.38
   0   4  -7 4772.22  184.08
   0   4  -7 5109.19  187.18
   0   4   7 4630.94  187.48
   0  -4   7 4745.02  184.28
   0  -4  -7 4555.24  184.48
   0  -4  -7 4806.82  188.58
   0  -4   7 4859.01  185.48
   0  -4  -7 4660.03  185.78
   0  -4   7 4549.04  185.88
   2   4  -9  532.55   24.50
  -2   4   9  547.05   26.00
   2   4  -9  494.95   24.40
  -2   4   9  517.35   25.80
   2  -4  -9  477.95   28.20
   2  -4  -9  523.65   25.70
  -2  -4   9  523.85   23.80
  -2  -4   9  544.15   24.50
   2  -4  -9  566.34   26.10
  -4   4  11  213.58   15.50
  -4   4  11  196.98   13.60
   4   4 -11  194.68   13.40
   4   4 -11  222.28   11.60
  -4  -4  11  216.88   13.90
  -4  -4  11  199.48    9.50
   4  -4 -11  181.38   13.20
  -6   4  13   53.89    8.10
  -6   4  13   32.60    8.90
   6   4 -13   51.69    8.90
   6  -4 -13   34.60    6.50
   6  -4 -13   56.79    9.60
  -6  -4  13   47.30    8.50
   8   4 -15   16.70    6.20
  -8   4  15    7.20    5.00
  -8  -4  15   14.30    8.80
   8  -4 -15   12.20    6.90
   8  -4 -15   14.80    5.50
 -10   4  17   11.80    6.50
  10   4 -17   18.70    7.50
  10  -4 -17   15.80    9.70
  10  -4 -17   12.00    5.60
  12   4 -19   39.90   13.60
  12  -4 -19   56.69    8.40
  12  -4 -19   33.40   15.00
  13   5  -6   13.20   10.30
 -13   5   6  -23.70   17.70
  13  -5  -6   11.10   12.90
  13  -5  -6   17.00    8.70
 -11   5   4   13.10   12.10
  11   5  -4   22.80    9.00
  11   5  -4    3.60    3.80
  11   5  -4    9.80    3.80
  11  -5  -4   14.10   10.20
  11  -5  -4    7.40    5.90
   9   5  -2   10.00    4.30
  -9   5   2   15.40    8.60
   9   5  -2   15.80    5.00
   9   5  -2   22.10    7.60
   9  -5  -2   17.70    7.20
   9  -5  -2   12.40    8.80
  -9  -5   2   14.90    8.10
  -7   5   0  119.49   15.70
   7   5   0  129.59   11.90
   7   5   0  156.68   14.00
   7   5   0  166.48   11.80
  -7   5   0  134.69   15.80
   7   5   0  136.39   16.70
   7  -5   0  141.39   13.60
   7  -5   0  161.68   15.70
   5   5   2   35.90    6.50
   5   5   2   34.60   10.20
   5   5   2   37.90    6.50
  -5   5  -2   46.10    8.50
  -5   5  -2   36.10    7.40
   5   5   2   38.50    6.00
   5  -5   2   28.40    6.80
  -5  -5  -2   26.40    6.50
   5  -5   2   34.00    8.90
  -3   5  -4   23.30    5.50
   3   5   4   15.10    3.30
   3   5   4   23.70    5.00
   3   5   4    7.90    5.40
   3   5   4   24.20    4.70
  -3  -5  -4   26.90    4.10
   3  -5   4   15.20    3.80
  -3  -5  -4   20.80    4.90
   3  -5   4   24.70    6.00
   3  -5   4   20.20    4.50
   3  -5   4   18.40    5.30
   1   5   6 1007.50   46.40
   1   5   6  958.70   40.60
  -1   5  -6  923.21   42.90
  -1   5  -6  953.60   40.40
   1   5   6  995.00   42.90
  -1   5  -6  914.41   42.70
   1  -5   6  984.00   40.50
  -1  -5  -6  953.40   42.80
  -1  -5  -6  968.60   40.70
   1  -5   6  836.92   42.40
   1  -5   6  943.11   42.80
  -1  -5  -6 1037.20   47.30
  -1   5   8  515.15   28.60
   1   5  -8  555.04   25.50
  -1   5   8  511.45   26.20
  -1   5   8  493.45   24.60
   1   5  -8  462.85   24.10
   1   5  -8  501.85   29.00
  -1  -5   8  609.14   25.70
   1  -5  -8  520.35   26.10
   1  -5  -8  523.35   29.20
   1  -5  -8  550.94   25.10
  -1  -5   8  501.15   23.70
  -3   5  10   50.79    7.50
   3   5 -10   76.39    8.10
   3   5 -10   70.19    6.30
  -3   5  10   76.09    9.20
  -3  -5  10   83.19    6.40
   3  -5 -10   77.29    9.30
   3  -5 -10   75.39   12.10
   3  -5 -10   58.59    8.10
  -3  -5  10   76.59    6.90
  -5   5  12  131.69   11.50
  -5   5  12  118.49   14.20
   5   5 -12  120.79   11.20
   5  -5 -12  152.08   13.70
  -5  -5  12  136.39    6.30
  -5  -5  12  122.79   11.40
   5  -5 -12  124.79   11.30
  -5  -5  12  138.49    6.70
  -7   5  14   10.70    8.30
   7   5 -14    4.00    4.90
  -7   5  14    2.00    4.60
   7  -5 -14    4.80    5.60
  -7  -5  14    2.70    6.00
   9   5 -16  186.88   18.30
  -9   5  16  185.08   15.90
   9  -5 -16  219.98   23.40
   9  -5 -16  164.58   14.60
  -9  -5  16  198.28   21.80
 -11   5  18  153.78   17.70
  11   5 -18  120.69   18.40
  11  -5 -18  145.59   21.70
  11  -5 -18  168.38   14.80
  12   6  -5   15.10    9.60
 -12   6   5    6.80   14.10
  12  -6  -5   12.40    7.30
  12  -6  -5    8.30   11.00
  10   6  -3   12.60    4.30
  10   6  -3   12.00    5.20
  10   6  -3    8.40    8.00
  10   6  -3   17.50    7.80
 -10   6   3   15.80   11.60
  10  -6  -3   13.80    6.80
  10  -6  -3   17.70    9.40
   8   6  -1   29.70    7.80
   8   6  -1   18.00    6.60
   8   6  -1   27.10    8.70
  -8   6   1   24.70    8.90
   8   6  -1   34.00    6.50
  -8   6   1   14.60    7.50
   8  -6  -1   35.60    8.70
   8  -6  -1   34.80    9.90
   6   6   1    8.20    4.20
  -6   6  -1   13.10    6.50
   6   6   1   15.40    4.60
   6   6   1   13.60   10.00
  -6   6  -1    9.80    6.40
   6   6   1   15.50    5.20
   6  -6   1   16.40    6.20
  -6  -6  -1    4.70    5.10
   6  -6   1    6.90    5.80
  -4   6  -3   68.39    9.60
  -4   6  -3   47.90    8.20
   4   6   3   53.49    7.50
   4   6   3   63.19    7.20
   4   6   3   56.39    6.20
   4  -6   3   45.40    8.40
   4  -6   3   70.29    8.60
  -4  -6  -3   56.49    8.60
   4  -6   3   58.19   10.50
   4  -6   3   29.40    8.20
  -2   6  -5   38.70    7.40
   2   6   5   25.60    6.20
   2   6   5   49.90    6.00
   2   6   5   35.10    8.20
  -2   6  -5   31.40    6.80
  -2  -6  -5   33.50    6.50
   2  -6   5   38.80    5.30
  -2  -6  -5   37.90    4.40
  -2  -6  -5   44.50   10.20
   2  -6   5   42.00    7.50
   2  -6   5   36.70    5.90
   2  -6   5   35.50    6.70
   0   6   7 1531.35   63.19
   0   6  -7 1637.24   69.29
   0   6   7 1614.44   66.69
   0   6  -7 1514.05   62.49
   0   6  -7 1584.04   65.79
   0   6   7 1549.14   69.69
   0  -6  -7 1513.75   66.19
   0  -6  -7 1603.44   74.69
   0  -6   7 1579.94   65.89
   0  -6   7 1509.35   62.99
   0  -6   7 1386.96   67.39
   0  -6  -7 1568.14   63.79
   2   6  -9  533.95   25.60
  -2   6   9  529.75   26.40
   2   6  -9  545.95   25.20
   2   6  -9  538.35   32.80
  -2   6   9  555.64   27.70
   2  -6  -9  509.25   26.00
  -2  -6   9  518.55   25.20
  -2  -6   9  511.15   23.70
   2  -6  -9  505.95   30.80
   2  -6  -9  495.75   27.00
  -4   6  11   46.40    8.50
  -4   6  11   34.50    6.70
   4   6 -11   56.69    6.30
   4   6 -11   30.40    6.00
  -4  -6  11   44.50    6.40
   4  -6 -11   34.10    6.80
   4  -6 -11   24.70    8.50
   4  -6 -11   44.10    7.70
  -4  -6  11   60.29    6.00
   6   6 -13   29.70    6.90
  -6   6  13   26.50    8.20
  -6   6  13   16.40    6.30
   6  -6 -13   24.80    8.60
  -6  -6  13   22.00    6.10
   6  -6 -13   32.60    7.40
  -8   6  15   43.40    9.80
   8   6 -15   50.29    9.90
  -8  -6  15   59.39   12.30
   8  -6 -15   50.39    9.40
   8  -6 -15   49.90   10.50
 -10   6  17  165.08   18.40
  10   6 -17  209.88   20.40
  10  -6 -17  199.68   17.10
  10  -6 -17  170.28   22.10
  12   6 -19   13.30   10.70
 -12   6  19  -16.40   13.10
  12  -6 -19   11.10    8.40
  13   7  -6   78.29   16.30
  13  -7  -6   85.89   20.30
  13  -7  -6   80.29   13.80
  11   7  -4   33.80    5.80
  11   7  -4   37.90    5.50
  11   7  -4   21.50    9.80
 -11   7   4   28.50   14.20
  11  -7  -4   39.60   10.30
  11  -7  -4   60.59   13.80
   9   7  -2  164.68   16.00
   9   7  -2  147.99   14.90
   9   7  -2  179.88   17.00
  -9   7   2  170.18   20.20
   9   7  -2  186.28   12.90
   9  -7  -2  209.68   24.00
   9  -7  -2  166.28   18.80
   7   7   0  533.05   28.80
  -7   7   0  518.45   35.80
   7   7   0  552.04   27.80
  -7   7   0  478.15   31.30
   7   7   0  575.34   42.30
   7   7   0  508.05   27.10
   7  -7   0  542.05   32.70
  -7  -7   0  522.55   30.60
   7  -7   0  493.35   30.70
   5   7   2   42.80   12.20
  -5   7  -2   16.40    5.90
   5   7   2   24.60    5.30
   5   7   2   29.60    5.10
  -5   7  -2   29.60    7.40
   5   7   2   29.40    6.20
   5  -7   2   17.40    6.10
  -5  -7  -2   24.10    6.60
   5  -7   2   36.60    7.60
   5  -7   2   30.10    9.00
   3   7   4 1409.56   57.69
   3   7   4 1411.36   61.39
   3   7   4 1422.56   57.89
  -3   7  -4 1336.37   62.59
   3  -7   4 1326.77   62.79
  -3  -7  -4 1460.55   61.99
   3  -7   4 1443.06   60.99
  -3  -7  -4 1510.05   70.49
   3  -7   4 1377.66   61.69
   3  -7   4 1355.56   64.49
   1   7   6  182.68   11.00
  -1   7  -6  230.68   14.90
  -1   7  -6  191.18   16.10
   1   7   6  197.78   17.80
   1   7   6  183.38   14.00
   1  -7   6  209.08   11.70
  -1  -7  -6  204.78   11.80
   1  -7   6  206.68   14.80
   1  -7   6  204.98   12.40
  -1  -7  -6  214.68   18.50
   1  -7   6  202.98   15.90
  -1  -7  -6  199.48   14.80
   1   7  -8  835.02   36.50
   1   7  -8  860.91   45.40
  -1   7   8  902.71   41.50
  -1   7   8  831.52   38.20
   1   7  -8  878.61   39.90
  -1   7   8  859.81   44.80
  -1  -7   8  832.12   39.60
   1  -7  -8  864.11   38.50
   1  -7  -8  841.12   45.10
   1  -7  -8  924.51   41.70
  -1  -7   8  883.41   36.60
  -3   7  10  600.24   32.00
   3   7 -10  624.54   29.70
   3   7 -10  637.34   30.20
  -3   7  10  650.73   33.30
  -3  -7  10  633.14   29.70
   3  -7 -10  666.33   38.60
   3  -7 -10  643.54   33.00
  -3  -7  10  642.54   28.80
   3  -7 -10  661.33   32.00
   5   7 -12  365.26   20.00
  -5   7  12  311.07   22.70
   5   7 -12  314.07   17.00
  -5   7  12  352.36   22.10
  -5  -7  12  339.17   19.40
   5  -7 -12  324.97   21.90
  -5  -7  12  326.57   16.30
   5  -7 -12  326.97   27.80
   5  -7 -12  329.17   21.50
   7   7 -14  185.98   16.00
  -7   7  14  201.28   17.30
  -7   7  14  198.38   19.80
   7  -7 -14  171.28   15.80
   7  -7 -14  146.39   17.30
  -7  -7  14  195.08   16.20
   9   7 -16    4.60    6.60
  -9   7  16    1.50    7.20
   9  -7 -16    2.20    6.00
  -9  -7  16    1.20    8.70
   9  -7 -16   12.50    8.50
 -11   7  18  254.77   26.20
  11   7 -18  290.77   25.50
  11  -7 -18  302.57   29.00
  11  -7 -18  304.57   22.70
  12   8  -5   35.30   12.50
  12  -8  -5   46.60   15.20
  10   8  -3   -6.70   14.60
  10   8  -3    7.20    7.50
  10   8  -3   17.00    6.80
  10   8  -3    7.40    4.50
  10   8  -3   21.40    7.20
  10  -8  -3    4.70    7.00
  10  -8  -3   -0.70    7.80
   8   8  -1    5.60    8.30
   8   8  -1   15.30    4.90
  -8   8   1   20.40    9.10
   8   8  -1   14.60    6.20
  -8   8   1   12.60    9.40
   8   8  -1    4.90    5.10
   8   8  -1    0.60    9.90
   8  -8  -1   13.20    7.00
   8  -8  -1    8.40    7.20
   8  -8  -1   -6.60    9.40
   6   8   1   23.80    5.30
   6   8   1   12.10    5.10
  -6   8  -1   23.50    8.40
   6   8   1   19.60    5.60
   6   8   1   26.20   11.30
  -6   8  -1   41.80   10.30
  -6  -8  -1   14.70    5.90
   6  -8   1   17.00    9.30
   6  -8   1   21.30    8.10
   6  -8   1   22.40    7.30
   4   8   3  475.55   33.70
   4   8   3  479.05   21.80
   4   8   3  467.05   21.80
  -4   8  -3  416.36   26.70
   4   8   3  440.96   25.10
  -4   8  -3  397.66   24.90
   4  -8   3  424.26   28.70
   4  -8   3  450.25   24.20
   4  -8   3  462.85   27.30
  -4  -8  -3  457.75   25.70
   4  -8   3  471.85   25.80
   2   8   5  112.69   16.40
  -2   8  -5  144.09   14.20
  -2   8  -5  119.29   12.00
   2   8   5  140.19   12.20
   2   8   5  161.08    9.10
   2  -8   5  152.28   14.90
  -2  -8  -5  150.88    8.30
   2  -8   5  144.09   10.80
  -2  -8  -5  143.59   19.10
   2  -8   5  127.29    9.70
   2  -8   5  130.39   12.90
  -2  -8  -5  126.99   12.40
   0   8   7  104.39   10.60
   0   8   7  104.49   14.30
   0   8  -7  103.99   10.30
   0   8  -7   94.89    6.90
   0   8  -7   73.39   12.40
   0   8   7   96.79    7.60
   0  -8  -7  109.69   12.40
   0  -8   7   94.19    7.50
   0  -8   7  102.09   14.50
   0  -8   7  119.99   12.70
   0  -8  -7   97.29   14.20
   0  -8  -7   87.89    7.70
   0  -8   7   93.99    7.40
  -2   8   9  183.08   18.10
   2   8  -9  148.69   10.10
   2   8  -9  140.29   12.20
  -2   8   9  185.58   14.60
  -2   8   9  176.58   12.90
   2   8  -9  178.48   21.90
  -2  -8   9  197.98   10.00
  -2  -8   9  165.08   12.60
   2  -8  -9  151.68   13.80
   2  -8  -9  159.68   12.30
   2  -8  -9  146.49   17.80
   4   8 -11  345.37   19.20
  -4   8  11  360.86   22.80
   4   8 -11  353.46   19.10
   4   8 -11  391.16   32.80
  -4   8  11  359.86   23.70
   4  -8 -11  348.37   22.90
  -4  -8  11  322.77   18.30
  -4  -8  11  359.06   18.90
   4  -8 -11  337.97   27.90
   4  -8 -11  336.27   21.60
  -6   8  13   38.50   10.80
   6   8 -13   37.70    7.70
   6   8 -13   47.70    6.00
  -6   8  13   41.00    9.30
   6  -8 -13   40.50    9.30
   6  -8 -13   55.39   11.40
  -6  -8  13   50.19    5.60
  -6  -8  13   33.10    7.00
   6  -8 -13   56.69   15.30
   8   8 -15   18.70    7.50
  -8  -8  15   19.40    8.70
   8  -8 -15   23.70   11.00
   8  -8 -15   30.90    8.60
 -10   8  17  207.78   22.20
  10   8 -17  227.28   23.50
  10  -8 -17  211.98   19.40
  10  -8 -17  171.48   23.20
  12   8 -19    5.40   11.20
  12  -8 -19    6.90   12.20
  12  -8 -19   10.50    9.40
  13   9  -6   25.10   22.50
  13   9  -6  -20.60   10.60
  13  -9  -6  -24.90    8.90
  13  -9  -6    3.70   12.10
  11   9  -4   69.89   12.90
  11   9  -4   51.79    6.80
  11   9  -4   38.30   10.40
  11   9  -4   48.60   23.60
  11   9  -4   38.50    7.20
  11  -9  -4   36.00   14.50
  11  -9  -4   46.70   11.50
   9   9  -2   -2.70    6.20
   9   9  -2    4.00    4.60
   9   9  -2   -0.60    5.10
   9   9  -2   -1.20    8.50
   9   9  -2   -0.80   11.40
   9  -9  -2    5.20    6.00
   7   9   0  539.85   27.50
  -7   9   0  537.05   33.80
   7   9   0  562.04   28.90
  -7   9   0  560.04   35.00
   7   9   0  555.14   28.30
   7   9   0  538.65   43.50
  -7  -9   0  579.24   32.30
   7  -9   0  482.15   32.10
   7  -9   0  496.55   37.60
   7  -9   0  503.55   32.60
  -5   9  -2   -2.50    4.90
   5   9   2    8.00    3.50
   5   9   2    8.60    3.50
  -5   9  -2   14.50    7.80
   5   9   2   10.10    7.70
   5   9   2   22.20    6.10
   5  -9   2    8.30    6.20
   5  -9   2    7.80    7.10
  -5  -9  -2   10.10    6.30
   5  -9   2    6.70    5.60
   3   9   4   37.80   12.10
  -3   9  -4   41.10   10.10
  -3   9  -4   29.40    7.50
   3   9   4   26.10    4.50
   3   9   4   37.40    4.50
   3   9   4   32.20    7.00
   3  -9   4   35.50    6.20
  -3  -9  -4   30.00    7.60
   3  -9   4   23.10    5.90
  -3  -9  -4   39.50   12.80
   3  -9   4   25.00    7.60
   3  -9   4   31.40    7.80
  -1   9  -6   52.89   12.00
   1   9   6   58.99    5.40
   1   9   6   64.79    9.60
  -1   9  -6   59.49    9.30
   1   9   6   47.70   11.40
   1  -9   6   56.49    6.70
   1  -9   6   59.49    9.30
  -1  -9  -6   62.19    6.10
  -1  -9  -6   61.09   10.10
   1  -9   6   48.10    6.20
   1  -9   6   65.09   11.80
  -1  -9  -6   78.49   14.60
   1   9  -8   12.10    4.70
  -1   9   8    9.20    7.20
   1   9  -8    8.70    2.70
  -1   9   8   11.30    5.30
  -1   9   8   14.60    4.30
  -1  -9   8    9.90    4.90
  -1  -9   8   12.50    6.80
   1  -9  -8    8.40    7.80
   1  -9  -8   11.10    4.40
   1  -9  -8    3.50    4.00
  -1  -9   8   12.70    2.90
   3   9 -10  316.17   19.10
   3   9 -10  302.37   16.90
  -3   9  10  357.96   23.00
  -3   9  10  324.27   20.10
   3   9 -10  292.07   27.60
  -3  -9  10  324.67   19.00
   3  -9 -10  311.37   21.80
   3  -9 -10  296.87   26.50
  -5   9  12   38.90    9.00
   5   9 -12   54.49   15.60
   5   9 -12   32.10    6.30
  -5   9  12   44.00   10.60
   5   9 -12   44.60    7.20
   5  -9 -12   30.10    8.20
   5  -9 -12   24.30    7.00
   5  -9 -12   30.20   11.30
  -5  -9  12   37.80    6.90
  -5  -9  12   34.10    5.80
  -7   9  14  619.64   36.90
   7   9 -14  651.83   53.19
   7   9 -14  619.94   27.50
   7   9 -14  570.84   32.20
  -7  -9  14  633.74   26.70
   7  -9 -14  662.73   37.70
   7  -9 -14  627.84   36.10
  -7  -9  14  619.44   33.40
  -9   9  16   12.30   10.00
   9   9 -16   15.50    7.80
   9  -9 -16   36.40    9.40
   9  -9 -16   16.50    9.20
  -9  -9  16   25.50   10.70
  11   9 -18   66.49   14.30
  11  -9 -18   33.50   13.70
  11  -9 -18   74.99   13.80
  12  10  -5    5.60   11.30
  12 -10  -5   11.40   12.40
  12 -10  -5   21.90   11.40
  10  10  -3    5.90    5.00
  10  10  -3   12.50    9.00
  10  10  -3   -5.90   13.80
  10  10  -3   -3.80    6.60
  10  10  -3    3.20    8.00
  10 -10  -3    5.40    7.90
  10 -10  -3   -4.10    9.70
   8  10  -1   10.00    7.10
   8  10  -1   14.90   13.70
   8  10  -1   20.00    6.70
   8  10  -1   11.00    5.50
   8 -10  -1   18.20    9.30
   8 -10  -1   18.00    8.20
  -8 -10   1   13.20    7.80
   6  10   1  104.29    9.30
  -6  10  -1  109.59   15.30
   6  10   1   91.09    8.50
  -6  10  -1  105.99   14.90
   6  10   1   92.49   11.70
   6  10   1  122.89   22.60
  -6 -10  -1   80.89   12.00
   6 -10   1   79.49   11.90
   6 -10   1  108.39   15.80
   4  10   3   41.60   13.50
   4  10   3   31.40    7.70
  -4  10  -3   22.10    8.60
   4  10   3   37.20    4.40
   4  10   3   34.60    4.90
   4 -10   3   27.20    9.30
   4 -10   3   23.20    5.90
   4 -10   3   35.30    7.70
  -4 -10  -3   29.90    8.30
   4 -10   3   35.60    9.50
  -2  10  -5   49.10   10.80
   2  10   5   61.39    5.00
   2  10   5   63.99   13.70
   2  10   5   67.69   11.00
  -2  10  -5   88.69   12.70
  -2 -10  -5   43.30   12.20
  -2 -10  -5   63.99    4.70
  -2 -10  -5   48.50    9.60
   2 -10   5   61.99    8.00
   2 -10   5   73.69    8.00
   2 -10   5   86.09   14.30
   2 -10   5   68.79   11.10
   0  10   7   78.19   14.70
   0  10   7   66.39    7.30
   0  10  -7   72.79   14.10
   0  10   7   45.30    9.20
   0  10  -7   49.50    9.00
   0 -10  -7   70.49    8.10
   0 -10   7   45.10   10.80
   0 -10  -7   83.49   12.20
   0 -10  -7   80.59   14.50
   0 -10   7   67.19    6.20
   0 -10   7   58.19   10.20
   0 -10   7   62.99    5.80
   2  10  -9  553.44   24.40
   2  10  -9  598.14   31.00
  -2  10   9  514.45   28.50
  -2  10   9  573.04   33.10
  -2  10   9  528.55   36.70
   2  10  -9  619.34   40.60
  -2 -10   9  608.64   30.90
   2 -10  -9  561.44   32.60
   2 -10  -9  584.44   28.90
   2 -10  -9  552.64   38.20
  -2 -10   9  593.34   24.20
   4  10 -11   80.79   18.20
  -4  10  11   69.59   11.30
   4  10 -11   90.99    9.50
   4  10 -11   73.99   10.20
  -4 -10  11   97.59   10.90
   4 -10 -11   79.99   11.50
   4 -10 -11   78.89   15.90
  -4 -10  11   78.99    7.20
   4 -10 -11   85.99   13.20
   6  10 -13  440.66   23.30
  -6  10  13  370.76   28.10
   6  10 -13  390.16   21.90
  -6  10  13  402.66   28.90
   6  10 -13  441.36   41.60
  -6 -10  13  396.46   21.80
   6 -10 -13  451.45   28.60
   6 -10 -13  388.36   27.00
  -6 -10  13  393.36   22.80
   8  10 -15  250.47   19.20
   8  10 -15  252.67   39.90
   8 -10 -15  228.28   22.10
   8 -10 -15  245.58   21.70
  -8 -10  15  231.38   20.10
  10  10 -17   79.19   13.50
  10  10 -17   73.79   26.90
  10 -10 -17   55.49   14.80
 -10 -10  17   66.59   14.60
  11  11  -4   14.40   20.50
  11  11  -4   50.49   11.10
  11  11  -4   35.50   11.40
  11  11  -4   26.10    9.10
  11 -11  -4   22.40   13.40
  11 -11  -4   19.80   10.80
   9  11  -2  149.69   22.40
   9  11  -2  188.18   14.60
   9  11  -2  140.09   29.70
   9  11  -2  141.59   14.20
   9  11  -2  191.38   15.90
   9 -11  -2  162.68   20.90
   9 -11  -2  116.69   17.90
   7  11   0    6.30    6.60
   7  11   0   15.40   13.10
   7  11   0    8.90    4.30
   7  11   0   11.50    4.30
  -7  11   0   28.30   10.10
  -7 -11   0   11.40    6.80
   7 -11   0   16.40    8.90
   7 -11   0   21.50    8.10
  -5  11  -2   41.00   10.80
   5  11   2   37.60    8.00
   5  11   2   29.80   12.90
   5  11   2   49.50    6.00
   5  11   2   54.49    5.30
   5 -11   2   50.69   10.10
   5 -11   2   57.99   17.00
   5 -11   2   39.80    8.30
  -5 -11  -2   47.20    9.80
   5 -11   2   46.90    9.60
  -3  11  -4   52.69   12.40
   3  11   4   75.79   10.60
  -3  11  -4   59.89   13.50
   3  11   4   54.19   13.90
   3 -11   4   58.39    8.40
  -3 -11  -4   89.69   12.90
  -3 -11  -4   52.29   17.50
   3 -11   4   55.89   12.30
   3 -11   4   56.19    8.80
   3 -11   4   74.69   12.70
  -1  11  -6   28.90    9.60
   1  11   6   25.40    4.20
   1  11   6   20.80    7.70
  -1  11  -6   33.20    8.50
   1  11   6   21.10    9.40
  -1 -11  -6   30.70    8.40
   1 -11   6   26.90    4.90
   1 -11   6   24.40    5.00
   1 -11   6   40.40    9.40
  -1 -11  -6   12.30   10.50
   1 -11   6   15.90    9.00
  -1 -11  -6   32.20    4.70
   1  11  -8  347.97   22.60
  -1  11   8  326.37   18.80
   1  11  -8  376.46   30.20
  -1  11   8  315.27   27.30
  -1  11   8  304.87   23.30
  -1 -11   8  304.97   27.20
  -1 -11   8  335.57   14.70
  -1 -11   8  369.86   23.00
  -1 -11   8  323.67   14.40
   1 -11  -8  283.37   28.20
   1 -11  -8  304.67   22.70
   1 -11  -8  335.77   18.80
  -3  11  10  165.18   18.70
   3  11 -10  206.78   16.00
   3  11 -10  177.08   26.60
  -3  11  10  180.28   15.60
   3  11 -10  177.38    9.40
  -3 -11  10  187.88    9.30
   3 -11 -10  170.48   17.40
   3 -11 -10  206.18   26.80
   3 -11 -10  192.28   15.10
  -3 -11  10  164.78   14.70
   5  11 -12   21.00   17.70
   5  11 -12   13.50    5.10
  -5  11  12   17.60    8.60
   5  11 -12   27.30    5.80
   5 -11 -12    8.50    6.30
   5 -11 -12   13.40    7.80
  -5 -11  12   10.40    5.40
  -5 -11  12   15.60    5.00
   7  11 -14  819.32   39.30
   7  11 -14  759.22   36.70
   7  11 -14  769.42   61.79
  -7 -11  14  790.12   36.70
   7 -11 -14  825.62   44.70
  -7 -11  14  793.02   38.70
   7 -11 -14  795.62   44.90
   9  11 -16   42.70   24.70
   9  11 -16   22.10    9.00
   9 -11 -16   61.59   13.80
   9 -11 -16   28.60   11.60
  -9 -11  16   22.30   10.40
  11  11 -18   27.70   28.10
  11  11 -18   30.10   11.70
  11 -11 -18   25.40   13.00
  11 -11 -18   14.30   11.80
  10  12  -3  180.18   23.80
  10  12  -3  190.38   34.90
  10  12  -3  155.18   16.50
  10  12  -3  151.48   15.00
  10  12  -3  166.68   16.30
  10 -12  -3  147.19   20.20
  10 -12  -3  152.48   22.00
   8  12  -1   11.60    6.00
   8  12  -1    0.80   13.90
   8  12  -1    5.10    5.20
   8 -12  -1   19.10    9.30
   8 -12  -1    4.30    9.30
  -8 -12   1   16.00    9.00
   6  12   1  160.08    9.40
   6  12   1  138.89   16.20
   6  12   1  143.69   24.20
   6  12   1  141.89   10.40
  -6  12  -1  142.19   20.20
  -6 -12  -1  152.98   17.80
   6 -12   1  120.69   17.10
   6 -12   1  149.09   15.70
   6 -12   1  187.18   26.20
   6 -12   1  155.28   17.20
  -4  12  -3   12.90    9.00
   4  12   3   23.50   12.30
   4  12   3   11.20    6.80
  -4 -12  -3   30.50    8.70
   4 -12   3   23.60    6.50
   4 -12   3   19.00    8.30
   4 -12   3   25.80    7.10
   2  12   5  403.96   29.40
   2  12   5  388.66   32.40
  -2  12  -5  321.77   28.00
  -2  12  -5  397.56   26.90
   2 -12   5  397.86   20.20
  -2 -12  -5  314.87   31.60
   2 -12   5  392.66   20.60
   2 -12   5  371.46   25.90
  -2 -12  -5  336.17   24.60
   2 -12   5  337.87   29.40
   0  12  -7  168.38   16.90
   0  12  -7  176.28   23.00
   0  12   7  140.29   21.10
   0  12   7  186.68   11.50
   0  12   7  158.78   18.10
   0 -12   7  205.98   25.10
   0 -12   7  170.28   16.60
   0 -12   7  172.38    9.60
   0 -12  -7  173.18   11.90
   0 -12  -7  187.58   17.40
   0 -12   7  162.98   10.00
   0 -12  -7  153.98   22.40
   2  12  -9   36.20    9.40
   2  12  -9   22.90   12.10
  -2  12   9   30.80    7.10
  -2  12   9   29.50   10.20
  -2  12   9   20.00    8.60
   2 -12  -9   14.00   11.50
   2 -12  -9   33.80   10.10
   2 -12  -9   31.80    7.10
  -2 -12   9   26.90    8.20
   4  12 -11  329.87   33.50
  -4  12  11  265.67   21.50
   4  12 -11  278.57   13.20
   4  12 -11  307.77   20.70
   4 -12 -11  307.37   21.10
  -4 -12  11  279.07   12.90
   4 -12 -11  296.37   23.50
  -4 -12  11  268.77   20.00
   6  12 -13  317.27   20.20
   6  12 -13  382.06   22.60
  -6  12  13  375.26   42.20
  -6 -12  13  349.37   19.10
   6 -12 -13  347.77   25.80
  -6 -12  13  332.57   21.40
   6 -12 -13  339.87   26.80
   8  12 -15   88.79   12.40
   8  12 -15  150.68   34.30
   8  12 -15  100.49    9.90
  -8 -12  15  119.99   13.40
  -8 -12  15   96.09    9.20
   8 -12 -15  100.39   16.70
   8 -12 -15   97.49   16.80
  10  12 -17    8.50    9.60
  10  12 -17   19.50   25.40
  10 -12 -17   22.20   11.30
 -10 -12  17    0.00   14.10
  10 -12 -17   21.10   12.90
  11  13  -4   80.39   26.00
  11  13  -4   51.39   10.90
  11 -13  -4    2.20   11.50
  11 -13  -4   58.19   16.70
   9  13  -2   -8.90   14.30
   9  13  -2   22.90    8.40
   9  13  -2   23.60    6.90
   9  13  -2   -2.50    6.20
  -9 -13   2   11.00   10.50
   9 -13  -2   24.10    9.60
   9 -13  -2   20.80   11.70
   7  13   0  168.18   31.20
   7  13   0  146.39   16.20
   7  13   0  132.29    8.90
   7  13   0  139.69   10.20
   7 -13   0  103.69   17.60
   7 -13   0  148.69   19.20
  -7 -13   0  162.88   18.20
   5  13   2  184.08   19.60
   5  13   2  141.09   24.70
   5 -13   2  144.09   14.70
  -5 -13  -2  182.78   19.50
   5 -13   2  104.09   20.40
   5 -13   2  172.78   16.30
   5 -13   2  157.98   20.10
  -3  13  -4  309.57   28.30
   3  13   4  404.66   26.70
   3  13   4  356.46   33.70
   3 -13   4  324.27   30.50
   3 -13   4  361.96   21.10
  -3 -13  -4  314.87   24.50
   3 -13   4  326.27   19.90
   3 -13   4  339.67   26.20
   1  13   6  168.28   25.00
   1  13   6  161.88    9.10
  -1  13  -6  159.08   18.70
  -1  13  -6  197.28   25.70
   1  13   6  202.88   19.10
  -1 -13  -6  165.78   19.60
  -1 -13  -6  183.58    8.90
   1 -13   6  164.08   19.00
   1 -13   6  158.68   11.20
  -1 -13  -6  171.98   24.60
   1 -13   6  160.38   10.80
   1  13  -8   61.79   11.60
   1  13  -8   47.70   14.70
  -1  13   8   43.80   12.00
  -1  13   8   33.00   11.80
  -1  13   8   42.20    7.30
   1 -13  -8   42.70   10.70
   1 -13  -8   45.10   16.10
  -1 -13   8   17.10   11.30
   1 -13  -8   29.60    6.30
  -1 -13   8   37.40    9.00
  -3  13  10  339.37   23.40
   3  13 -10  336.97   39.90
   3  13 -10  358.66   24.70
   3 -13 -10  387.26   27.20
   3 -13 -10  321.07   21.50
  -3 -13  10  391.56   25.20
   5  13 -12   84.89   11.30
   5  13 -12   57.09   19.70
  -5  13  12  106.69   15.70
  -5 -13  12   77.29   12.00
   5 -13 -12   81.29   13.30
   5 -13 -12   76.29   16.70
   7  13 -14   24.30    7.50
   7  13 -14   25.00    7.30
   7  13 -14   35.90   22.60
   7 -13 -14   22.30   10.10
  -7 -13  14   26.70    6.70
   7 -13 -14   41.60   12.10
  -7 -13  14   26.70    8.00
   9  13 -16  100.89   13.80
   9  13 -16   43.30   24.50
  -9 -13  16   76.29   14.00
   9 -13 -16   85.89   17.60
   9 -13 -16   57.99   13.80
  10  14  -3   12.80   15.20
  10  14  -3   12.30    6.50
  10  14  -3    5.90   20.60
  10 -14  -3   -1.10   12.20
  10 -14  -3   33.90   13.80
   8  14  -1   27.70    9.80
   8  14  -1   17.30    4.80
   8  14  -1   13.30    3.70
   8  14  -1   22.90   18.40
   8 -14  -1   20.60   10.60
   8 -14  -1    9.20    9.60
  -8 -14   1   21.70   10.90
   6  14   1   77.49   13.30
   6  14   1   54.89   19.40
   6 -14   1  112.49   17.80
   6 -14   1   71.29   12.40
   6 -14   1   97.69   13.80
  -6 -14  -1   75.29   14.10
   4  14   3   33.10   10.60
   4  14   3   19.50   15.40
   4 -14   3   10.70    6.40
   4 -14   3   19.60    6.90
   4 -14   3   17.10    8.80
  -4 -14  -3    7.90    7.20
  -2  14  -5  337.47   31.90
   2  14   5  328.87   34.00
   2 -14   5  407.36   29.30
   2 -14   5  387.06   20.90
  -2 -14  -5  397.06   28.10
   2 -14   5  404.56   34.70
   2 -14   5  413.76   21.10
   0  14  -7   60.99   15.10
   0  14   7   70.49    7.50
   0  14  -7   53.59   12.30
   0  14   7   77.29   18.20
   0 -14  -7   58.19    7.20
   0 -14   7   69.19   12.30
   0 -14  -7   36.30   10.30
   0 -14   7   46.10   16.20
   2  14  -9   15.70    8.60
  -2  14   9    0.10    5.00
   2  14  -9   -5.90   11.30
  -2  14   9    8.90   10.60
   2 -14  -9    2.90    5.10
   2 -14  -9    5.00    7.20
  -2 -14   9   10.00    7.40
   4  14 -11   19.00    8.60
  -4  14  11    7.60    8.10
   4  14 -11   -0.50   15.50
   4 -14 -11   15.80    9.50
  -4 -14  11   22.40    7.80
   4 -14 -11   19.50    6.40
   6  14 -13    1.50    7.30
   6  14 -13    1.20   15.20
   6 -14 -13    0.10    8.00
   6 -14 -13   -6.80    7.40
  -6 -14  13    3.80    6.70
   8  14 -15   16.70    6.90
   8  14 -15  -30.70   17.30
   8  14 -15   14.70    7.70
  -8 -14  15   -0.40    6.90
   8 -14 -15   17.40    9.80
   8 -14 -15   -4.10   10.70
   9  15  -2   24.10   22.30
   9  15  -2   36.90   10.70
  -9 -15   2   31.40   13.70
   9 -15  -2   40.20   13.70
   9 -15  -2   38.90   13.60
   7  15   0   -5.50   14.90
  -7 -15   0    8.60    8.20
   7 -15   0    8.60    8.30
   7 -15   0   18.00   11.50
   5  15   2  331.07   41.10
   5 -15   2  419.26   26.30
   5 -15   2  355.16   29.40
   5 -15   2  364.76   24.90
  -5 -15  -2  410.66   29.80
   3  15   4    2.80   11.30
  -3  15  -4    7.10   10.80
  -3 -15  -4    2.70    7.20
   3 -15   4    1.20    4.80
   3 -15   4    6.90    4.70
   3 -15   4    4.00    7.30
  -1  15  -6   29.40   13.70
   1  15   6   47.80   16.80
   1 -15   6   39.10    4.80
   1 -15   6   55.59    6.40
  -1 -15  -6   44.10   12.80
   1 -15   6   55.19   12.00
  -1  15   8  108.19   10.80
  -1  15   8   87.49   18.40
   1  15  -8  103.39   22.50
   1 -15  -8  106.29   17.40
   1 -15  -8  110.79   11.30
  -1 -15   8  141.69   18.30
   3  15 -10  109.19   16.80
  -3  15  10  138.79   15.30
   3 -15 -10  123.09   18.90
  -3 -15  10  112.09   16.30
   3 -15 -10  115.49   13.90
  -5  15  12   -2.30    9.60
   5  15 -12   18.90   15.60
   5  15 -12    2.20    8.60
   5 -15 -12   13.80    8.50
  -5 -15  12   12.20    8.20
   5 -15 -12    9.60    8.80
   7  15 -14   39.00   10.60
   7  15 -14   47.70   18.90
   7 -15 -14   34.10   12.60
  -7 -15  14   46.50   10.40
   7 -15 -14   29.60   12.00
   9  15 -16   36.20   26.00
   9 -15 -16   36.10   15.60
   9 -15 -16   49.10   15.10
   8  16  -1   26.00   20.60
   8 -16  -1   42.00   14.20
   8 -16  -1    5.00   10.80
  -8 -16   1   38.40   13.60
   6  16   1  124.69   29.10
  -6 -16  -1  173.68   21.70
   6 -16   1  186.68   23.60
   6 -16   1  167.78   18.80
   6 -16   1  150.68   17.80
   4  16   3  483.25   46.70
   4 -16   3  568.54   29.90
   4 -16   3  479.15   28.60
   4 -16   3  541.45   37.50
  -2  16  -5   22.00   18.80
   2  16   5    7.40   12.80
   2 -16   5    6.90    4.40
   2 -16   5    7.50    7.80
   2 -16   5    1.00    4.30
  -2 -16  -5   -5.10    7.90
   0  16   7    3.40   11.70
   0  16  -7    0.30   12.20
   0 -16  -7   20.50    3.60
   0 -16   7    2.50    7.20
   0 -16  -7   17.70   10.00
   2  16  -9   40.40   16.40
  -2  16   9   44.10   17.80
  -2  16   9   79.99   10.50
   2 -16  -9   65.59    9.70
   2 -16  -9   92.59   16.50
  -2 -16   9   66.99   13.00
   4  16 -11  -14.20   13.50
   4 -16 -11   -4.50    7.00
   4 -16 -11   26.80   12.50
  -4 -16  11   26.40    8.90
   6  16 -13   17.00   11.10
   6  16 -13   -4.30   18.70
   6 -16 -13   -0.50    8.40
  -6 -16  13   -5.00    7.90
   6 -16 -13    4.30    9.20
   8  16 -15   35.90   27.40
  -8 -16  15   33.40   10.90
   8 -16 -15   24.70   14.70
   8 -16 -15   59.39   15.40
   7  17   0    4.60   18.90
   7 -17   0   19.00   11.50
  -7 -17   0   10.60   10.90
   5  17   2  147.09   31.40
   5 -17   2  165.88   18.80
   5 -17   2  194.98   25.60
   5 -17   2  158.38   16.90
  -5 -17  -2  129.79   19.40
  -3  17  -4   46.90   17.90
   3  17   4   48.60   19.00
   3 -17   4   69.79    9.90
   3 -17   4   68.09    9.90
   3 -17   4  100.89   18.70
  -3 -17  -4   75.19   16.60
  -1  17  -6   16.30   14.30
   1  17   6   24.20   15.00
   1 -17   6   40.40   12.80
  -1 -17  -6   29.20   11.30
  -1  17   8   -1.40    4.90
  -1  17   8    5.60   14.40
   1  17  -8   -3.30   14.70
   1 -17  -8    0.30    4.60
  -1 -17   8   10.40    9.50
   1 -17  -8    4.20    8.60
   3  17 -10   26.00   20.30
  -3  17  10   10.20    9.40
   3 -17 -10   19.70   10.40
   3 -17 -10    9.90    7.40
   5  17 -12   17.30   20.20
   5 -17 -12    7.00    9.70
  -5 -17  12   12.60    9.70
   5 -17 -12   10.20   11.90
   7 -17 -14   44.70   26.10
   7 -17 -14   25.80   12.80
  -7 -17  14   29.20   11.30
  -6 -18  -1   83.39   16.60
   6 -18   1   42.30   12.50
   4  18   3   72.19   24.40
  -4 -18  -3   40.50   14.30
   4 -18   3   63.49   11.10
   4 -18   3   76.99   10.90
   4 -18   3   31.30   14.40
   2  18   5    1.10   13.00
  -2  18  -5    8.10   15.00
  -2 -18  -5   -1.80    9.30
   2 -18   5   -2.20    3.60
   2 -18   5    6.80   11.10
   2 -18   5    1.70    4.70
   0  18   7   34.50   20.70
   0  18  -7   13.60   16.00
   0 -18   7   12.60    9.20
   0 -18  -7   33.40   12.80
   2  18  -9   29.40   19.70
  -2  18   9   10.10   15.70
  -2  18   9   19.50    8.20
   2 -18  -9   42.10   13.90
  -2 -18   9   15.70   11.00
   2 -18  -9   18.30    8.00
  -4  18  11   29.70   12.90
   4  18 -11   65.49   25.20
   4 -18 -11   45.70   11.60
  -4 -18  11   22.10   10.90
   4 -18 -11   53.59   15.50
   6 -18 -13   -9.30   10.70
  -6 -18  13    0.30   10.60
   6 -18 -13    6.30   11.70
   5  19   2  137.39   31.20
   5 -19   2  150.38   16.90
  -5 -19  -2  190.98   25.70
   5 -19   2  176.58   21.80
   5 -19   2  130.79   22.10
   3  19   4   47.10   21.40
   3 -19   4   26.00    7.20
  -3 -19  -4   -3.20    9.60
   3 -19   4    4.30   12.00
   1  19   6   22.90   17.20
  -1  19  -6   38.10   19.70
   1 -19   6   10.70   11.50
  -1 -19  -6   -9.40   10.10
   1  19  -8   26.00   16.80
  -1  19   8   11.60   15.40
   1 -19  -8   -3.40   11.20
  -1 -19   8   -5.00   10.20
  -3  19  10   17.50   14.10
   3  19 -10    6.10   19.50
   3 -19 -10   12.20    9.30
  -3 -19  10   20.50   13.50
   5  19 -12   24.20   28.90
   5 -19 -12    6.70   14.10
  -5 -19  12    6.00   11.20
   5 -19 -12   14.10   11.40
   4  20   3   -8.80   20.00
  -4 -20  -3    5.20   12.50
   4 -20   3    7.50   14.60
   4 -20   3    4.20   10.90
  -2  20  -5    9.30   16.20
   2  20   5   16.40   18.30
  -2 -20  -5   21.60   13.20
   0  20   7  -17.90   17.70
   0  20  -7    2.00   18.40
   0 -20   7   14.30   13.50
   0 -20  -7    0.50   21.30
  -2  20   9   28.80   19.40
   2  20  -9   27.80   22.10
   2 -20  -9   15.40    6.90
   2 -20  -9    7.90   11.90
  -2 -20   9   12.80   11.50
  14   0  -6   25.50   14.80
  12   0  -4   14.10   11.10
  12   0  -4   -1.30    5.20
  12   0  -4    9.40    8.20
  10   0  -2   47.10    9.90
  10   0  -2   44.00   11.60
  10   0  -2   40.20    8.30
  -8   0   0   44.00   10.40
  -8   0   0   36.60    8.80
   8   0   0   34.10    8.90
   8   0   0   57.49    8.60
  -6   0  -2 3980.60  163.18
  -6   0  -2 3826.02  160.58
   6   0   2 3945.41  160.98
   6   0   2 4083.59  159.08
   4   0   4  161.68   12.80
  -4   0  -4  175.68   14.50
   4   0   4  153.78   12.10
   2   0   6  703.53   35.30
  -2   0  -6  707.73   35.60
  -2   0  -6  693.83   31.10
   0   0  -8   60.99    7.20
   0   0   8   49.50    6.70
   0   0   8   63.59    9.00
  -2   0  10   41.50    4.90
  -2   0  10   28.10    4.90
   2   0 -10   40.90    5.70
   2   0 -10   34.20    5.10
   4   0 -12  142.79    9.30
   4   0 -12  153.88   12.30
  -4   0  12  135.99   11.70
  -4   0  12  156.78    8.70
  -6   0  14   48.00   10.00
   6   0 -14   40.60    8.30
   6   0 -14   51.89    5.60
  -6   0  14   51.29    4.70
   8   0 -16  534.95   31.70
  -8   0  16  448.06   31.60
  10   0 -18  204.48   23.30
  12   0 -20   50.59   13.70
  13   1  -5   17.50    5.80
  13   1  -5   12.60    8.20
  13   1  -5   31.90   12.20
  13  -1  -5   13.30   12.30
  13  -1  -5    8.60    6.60
  13  -1  -5   24.80   10.00
 -11   1   3   77.39   15.40
  11   1  -3   65.49   11.40
  11   1  -3   89.19   15.90
  11   1  -3   78.29   10.30
  11  -1  -3   66.39   10.10
  11  -1  -3  119.29   18.00
   9   1  -1   41.20   10.10
   9   1  -1   30.90    6.90
  -9   1   1   32.50    9.60
   9   1  -1   36.30    7.90
  -9   1   1   21.50    8.10
   9  -1  -1   23.90    8.10
   9  -1  -1   28.40    6.60
  -9  -1   1   24.20    9.60
   7   1   1 1035.90   54.89
  -7   1  -1 1228.08   55.99
  -7   1  -1 1107.09   54.89
   7   1   1 1165.08   54.69
   7   1   1 1149.39   51.79
  -7  -1  -1 1126.69   54.59
   7  -1   1 1219.58   52.39
   7  -1   1 1133.79   55.19
  -5   1  -3 4507.55  175.78
   5   1   3 4311.27  174.68
   5   1   3 4157.08  173.58
  -5   1  -3 4571.24  174.78
   5   1   3 4286.07  172.18
   5   1   3 4102.09  175.88
   5  -1   3 4212.98  172.58
   5  -1   3 4415.86  173.58
  -5  -1  -3 4450.85  178.28
   5  -1   3 4454.65  174.68
   3   1   5  190.18   11.30
  -3   1  -5  179.08   13.60
   3   1   5  225.38   16.50
   3   1   5  182.08   13.80
   3  -1   5  169.08   12.40
  -3  -1  -5  189.88   11.50
   3  -1   5  168.78   11.00
   3  -1   5  179.28   13.30
   1   1   7   53.79    6.10
   1   1   7   48.10    6.50
   1   1   7   45.60    4.50
  -1   1  -7   40.50    6.50
  -1   1  -7   42.90    5.30
   1  -1   7   72.59    8.90
  -1  -1  -7   48.50    6.90
  -1  -1  -7   45.50    5.20
  -1  -1  -7   45.90    5.60
   1  -1   7   50.19    5.80
   1   1  -9    3.00    2.40
  -1   1   9    7.90    2.70
  -1   1   9    7.80    2.80
  -1  -1   9    9.70    3.20
  -1  -1   9    6.60    2.90
   1  -1  -9    2.70    2.40
  -1  -1   9    3.20    2.90
   1  -1  -9   11.50    3.00
  -3   1  11   87.69   10.50
  -3   1  11   80.09    6.50
   3   1 -11   84.39    8.30
  -3  -1  11   90.19    6.00
   3  -1 -11   84.69    6.90
  -3  -1  11   81.99    7.70
   3  -1 -11   93.39    9.00
  -3  -1  11   85.39    8.40
   5   1 -13   35.00    7.50
  -5   1  13   38.90    4.90
  -5   1  13   21.50    6.50
  -5  -1  13   30.70    2.90
  -5  -1  13   52.39    9.40
  -5  -1  13   30.20    4.20
   5  -1 -13   41.20    5.20
   5  -1 -13   23.50    6.30
  -7   1  15  705.93   29.90
   7   1 -15  673.23   36.60
   7  -1 -15  651.23   29.80
   7  -1 -15  669.43   37.00
  -7  -1  15  634.04   36.80
   9   1 -17   84.79   14.00
  -9   1  17   84.49    6.80
   9  -1 -17   73.19   13.00
   9  -1 -17   76.19    6.80
  11   1 -19    9.80    7.80
  11  -1 -19   18.90   11.70
  13   1 -21    5.20   11.60
  13  -1 -21    9.50   11.00
  14   2  -6   26.80   12.40
  14  -2  -6    1.10   12.60
  14  -2  -6   -3.20    6.70
  12   2  -4   35.20    6.30
  12   2  -4   27.60   11.50
 -12   2   4   19.90   14.20
  12   2  -4   28.00    7.30
  12  -2  -4   29.70    8.70
  12  -2  -4   18.50    9.30
 -10   2   2  106.99   17.20
  10   2  -2   89.09   10.80
  10   2  -2   98.99   16.30
  10  -2  -2  102.09   16.00
  10  -2  -2  118.59   13.40
  -8   2   0   -3.20    7.00
   8   2   0    1.90    3.70
   8   2   0    6.10    6.00
  -8   2   0   16.20    6.80
   8   2   0    5.60    5.20
   8  -2   0   10.60    7.00
   8  -2   0   16.70    5.90
  -8  -2   0    9.10    6.70
  -6   2  -2 2135.19   92.49
   6   2   2 2157.38   91.59
  -6   2  -2 2188.18   92.29
   6   2   2 2029.30   90.89
   6   2   2 2084.39   91.99
  -6  -2  -2 2185.48   91.49
   6  -2   2 2177.78   92.59
   6  -2   2 2236.28   90.59
  -4   2  -4   20.10    5.30
   4   2   4   12.40    5.40
   4   2   4   12.50    4.20
   4   2   4   14.20    5.40
   4   2   4   11.00    3.40
   4  -2   4   14.80    4.80
   4  -2   4   14.20    4.70
   2   2   6 1842.32   74.99
  -2   2  -6 1760.82   74.59
  -2   2  -6 1749.12   72.49
   2   2   6 1701.43   73.89
   2   2   6 1772.92   72.29
   2  -2   6 1933.51   75.19
  -2  -2  -6 1719.43   74.79
  -2  -2  -6 1746.33   72.09
   2  -2   6 1837.52   72.59
   0   2  -8  425.16   23.00
   0   2   8  446.26   22.40
   0   2   8  464.65   22.80
   0   2   8  471.55   22.30
   0  -2  -8  480.85   22.80
   0  -2  -8  466.55   22.70
   0  -2   8  517.75   23.60
   0  -2  -8  443.36   22.40
   0  -2   8  457.85   22.40
   2   2 -10   30.70    5.20
  -2   2  10   18.80    4.40
  -2   2  10   28.60    4.50
   2   2 -10   21.30    4.80
  -2  -2  10   15.40    3.90
   2  -2 -10   21.70    4.30
  -2  -2  10   28.00    4.40
   2  -2 -10   16.40    4.20
   4   2 -12   60.59    8.30
  -4   2  12   30.90    6.40
  -4   2  12   35.70    5.20
   4  -2 -12   33.50    5.40
  -4  -2  12   39.00    3.30
   4  -2 -12   56.99    8.80
  -4  -2  12   43.00    3.50
  -4  -2  12   42.40    6.90
   6   2 -14   13.30    5.90
  -6   2  14   16.30    4.10
  -6   2  14   34.70    8.90
  -6  -2  14   15.00    6.40
   6  -2 -14   17.20    6.60
   6  -2 -14   11.20    3.30
   8   2 -16  443.96   28.10
  -8   2  16  419.86   21.80
  -8   2  16  429.86   32.20
  -8  -2  16  418.56   29.00
   8  -2 -16  439.76   21.90
   8  -2 -16  387.96   27.90
 -10   2  18    1.30    4.80
  10   2 -18   11.30    7.70
  10  -2 -18    3.50    3.70
  10  -2 -18   11.60    8.40
  12   2 -20   64.89   14.60
  12  -2 -20   60.19   15.20
  13   3  -5   18.40    3.80
 -13   3   5  -17.20   15.30
  13   3  -5   22.30    4.40
  13   3  -5   36.80   13.70
  13  -3  -5   25.40   12.00
  13  -3  -5   18.60    7.80
  11   3  -3    1.80    5.10
  11   3  -3    9.30    7.80
 -11   3   3   11.30   10.70
  11   3  -3    8.30    4.70
  11  -3  -3   17.50    6.80
  11  -3  -3    9.90    8.40
   9   3  -1  778.52   37.70
  -9   3   1  813.02   43.00
   9   3  -1  745.63   36.90
   9   3  -1  769.42   42.20
  -9   3   1  734.13   43.80
   9  -3  -1  858.01   45.30
   9  -3  -1  782.52   39.50
  -9  -3   1  684.33   45.50
  -7   3  -1  140.79   13.40
   7   3   1  120.69   12.00
   7   3   1  124.09   12.10
   7   3   1  109.29   13.00
   7   3   1  107.49   13.40
  -7   3  -1  147.59   16.40
   7  -3   1  133.79   16.40
   7  -3   1  135.89   12.70
  -7  -3  -1  133.79   15.00
   5   3   3   15.10    4.90
  -5   3  -3   10.30    4.70
   5   3   3    4.00    5.90
  -5   3  -3    3.10    4.20
   5   3   3   24.70    6.00
   5  -3   3   11.30    4.80
   5  -3   3   10.90    5.00
   3   3   5 1396.76   58.39
  -3   3  -5 1475.05   61.69
   3   3   5 1402.16   60.69
   3   3   5 1384.66   63.19
  -3  -3  -5 1454.15   61.79
   3  -3   5 1399.06   59.19
   3  -3   5 1442.36   61.09
   3  -3   5 1360.36   60.99
  -3  -3  -5 1432.96   58.59
   1   3   7   63.69    6.40
  -1   3  -7   75.19    7.30
   1   3   7   58.09    7.30
  -1   3  -7   63.59    6.00
  -1   3  -7   69.29    5.20
   1   3   7   56.49    7.40
  -1  -3  -7   59.89    7.20
  -1  -3  -7   50.59    7.50
  -1  -3  -7   67.39    6.40
   1  -3   7   65.19    5.40
   1  -3   7   60.99    7.20
   1  -3   7   68.39    6.00
  -1   3   9  186.38   11.50
  -1   3   9  194.68   11.70
   1   3  -9  180.18   11.30
   1   3  -9  180.58   11.60
  -1  -3   9  168.68   10.90
   1  -3  -9  167.28   11.20
  -1  -3   9  166.68   10.70
   1  -3  -9  173.08   12.80
   1  -3  -9  152.18   10.90
   3   3 -11  101.09    8.70
  -3   3  11  101.79    9.90
   3   3 -11   98.89    8.90
  -3   3  11  110.69    8.90
  -3  -3  11  108.89    8.90
   3  -3 -11  102.79    9.70
  -3  -3  11  107.89    6.80
   3  -3 -11  112.69    9.00
  -5   3  13  251.57   18.30
  -5   3  13  216.08   13.80
  -5  -3  13  199.48   15.60
   5  -3 -13  240.98   14.50
   5  -3 -13  208.18   16.30
   7   3 -15   81.29   11.70
  -7   3  15   49.10    7.20
  -7   3  15   59.39   11.10
   7  -3 -15   44.10    9.30
   7  -3 -15   42.60    6.70
  -7  -3  15   73.99   11.40
  -9   3  17    6.80    4.80
   9   3 -17    7.10    6.70
   9  -3 -17    9.40    4.50
   9  -3 -17   22.70   14.30
 -11   3  19   21.40    8.10
  11   3 -19   11.70    9.10
  11  -3 -19   16.20   10.80
  11  -3 -19   14.70    5.30
  13   3 -21   10.60   22.20
  13  -3 -21    2.70   11.70
  14   4  -6   49.99   16.10
  14  -4  -6   57.69   18.10
  14  -4  -6   62.79   11.70
  12   4  -4  124.49    9.60
  12   4  -4  116.49    9.50
 -12   4   4   56.79   18.40
  12   4  -4  122.79   18.30
  12  -4  -4   96.09   14.00
  12  -4  -4   70.29   15.70
  10   4  -2   57.99    8.60
  10   4  -2   77.59   13.80
 -10   4   2   78.09   15.70
  10   4  -2   73.19    8.50
 -10  -4   2   35.30   11.50
  10  -4  -2   80.69   18.80
  10  -4  -2   68.09   11.10
   8   4   0  197.08   14.30
   8   4   0  153.28   16.00
   8   4   0  184.38   14.70
   8   4   0  181.98   15.20
  -8   4   0  186.28   17.40
  -8   4   0  201.68   18.30
   8  -4   0  204.18   16.50
  -8  -4   0  182.18   17.20
   8  -4   0  197.98   19.10
   6   4   2   39.40    6.60
  -6   4  -2   39.50    8.70
   6   4   2   29.50    6.50
   6   4   2   23.80    6.20
   6   4   2   11.20    7.20
  -6   4  -2   46.60    8.90
   6  -4   2   36.10    8.40
   6  -4   2   34.90    7.00
   4   4   4   72.39    8.50
   4   4   4   86.19    9.80
   4   4   4   57.79    6.80
  -4   4  -4   74.59   10.00
   4   4   4   69.89   11.70
   4  -4   4   57.99    8.40
   4  -4   4   82.19   10.40
   4  -4   4   88.39    9.70
  -4  -4  -4   65.39    9.00
   2   4   6   32.20    5.70
  -2   4  -6   46.10    7.00
  -2   4  -6   26.60    4.60
   2   4   6   41.30    5.70
   2   4   6   27.00    6.10
   2  -4   6   26.30    4.60
  -2  -4  -6   28.70    4.60
   2  -4   6   28.60    5.40
   2  -4   6   30.80    5.20
  -2  -4  -6   35.70    7.00
  -2  -4  -6   25.90    5.00
   0   4  -8 4957.80  194.08
   0   4   8 4770.82  196.88
   0   4   8 4884.51  194.18
   0   4  -8 5198.88  196.28
   0   4   8 5155.58  195.98
   0   4  -8 5058.59  195.38
   0  -4  -8 4746.33  194.38
   0  -4   8 5005.00  194.38
   0  -4  -8 4912.91  197.98
   0  -4   8 4914.71  194.98
   0  -4  -8 5135.19  195.78
  -2   4  10 3545.45  141.99
   2   4 -10 3679.53  140.99
  -2   4  10 3478.55  141.79
   2   4 -10 3703.63  140.59
   2  -4 -10 3590.44  141.79
   2  -4 -10 3401.26  145.19
  -2  -4  10 3492.95  140.29
   2  -4 -10 3494.55  141.69
  -2  -4  10 3594.14  139.59
  -4   4  12  874.21   42.00
   4   4 -12  818.82   37.10
   4   4 -12  899.51   39.70
  -4   4  12  845.52   41.60
   4  -4 -12  991.40   42.10
   4  -4 -12  820.62   39.00
  -4  -4  12  767.42   38.80
  -4  -4  12  866.51   34.80
   6   4 -14  161.28   14.40
  -6   4  14  171.18   12.90
  -6   4  14  172.38   16.10
   6  -4 -14  161.68   12.90
   6  -4 -14  171.68   15.90
  -6  -4  14  183.18   15.20
  -8   4  16   24.10    6.70
   8   4 -16   28.20    8.30
  -8  -4  16   46.30    9.40
   8  -4 -16   31.00    9.70
   8  -4 -16   37.30    6.70
 -10   4  18   61.19    9.60
  10   4 -18   63.99   20.10
  10  -4 -18   59.49   12.90
  10  -4 -18   60.79    8.70
  12   4 -20    9.50   10.80
 -12   4  20   -1.90   11.20
  12  -4 -20    4.90    5.80
  12  -4 -20   16.10   12.60
  13   5  -5  112.39   19.20
 -13   5   5  110.29   24.80
  13  -5  -5  108.59   21.30
  13  -5  -5  145.09   16.80
  11   5  -3  210.18   13.30
 -11   5   3  201.08   26.30
  11   5  -3  172.98   20.80
  11   5  -3  194.48   14.00
  11  -5  -3  202.68   18.30
  11  -5  -3  220.08   25.10
   9   5  -1   55.89    8.00
  -9   5   1   44.50   10.50
   9   5  -1   55.29    9.50
   9   5  -1   52.49   10.40
   9   5  -1   51.99   10.10
   9  -5  -1   70.79   12.20
   9  -5  -1   66.79   13.90
   7   5   1   34.20    9.50
  -7   5  -1   16.50    7.30
   7   5   1   39.70    7.30
   7   5   1   25.20    6.80
   7   5   1   35.70    6.40
  -7   5  -1   33.70    8.70
   7  -5   1   27.60    8.10
   7  -5   1   35.90    8.30
   5   5   3    0.00    5.90
  -5   5  -3    0.20    4.40
  -5   5  -3    3.30    3.70
   5   5   3    3.60    3.10
   5   5   3    0.70    2.90
   5   5   3    5.50    3.80
  -5  -5  -3    5.30    4.10
   5  -5   3    4.70    4.30
   5  -5   3   -1.70    4.50
   3   5   5   18.40    3.90
   3   5   5   10.10    5.10
  -3   5  -5   15.20    5.30
   3   5   5   19.60    5.10
   3  -5   5   14.90    3.60
  -3  -5  -5   14.00    4.60
   3  -5   5   16.60    4.80
   3  -5   5   19.00    4.80
  -3  -5  -5   10.20    3.10
   3  -5   5   15.50    5.20
  -1   5  -7  596.44   29.10
   1   5   7  605.84   32.00
   1   5   7  583.44   27.30
  -1   5  -7  607.74   27.10
  -1   5  -7  615.44   29.50
   1   5   7  604.34   29.40
   1  -5   7  591.04   27.00
  -1  -5  -7  565.94   27.30
   1  -5   7  597.74   29.30
   1  -5   7  556.84   28.80
  -1  -5  -7  622.14   32.90
  -1  -5  -7  599.34   29.30
  -1   5   9 2161.68   89.09
   1   5  -9 2151.68   89.59
  -1   5   9 1985.10   84.29
  -1   5   9 2068.19   88.79
   1   5  -9 2202.88   85.09
   1   5  -9 2080.19   84.29
   1  -5  -9 2004.40   84.39
  -1  -5   9 2086.89   84.49
  -1  -5   9 1993.50   83.29
   1  -5  -9 2021.30   85.79
   1  -5  -9 2038.20   89.39
   3   5 -11  476.25   23.30
   3   5 -11  466.45   24.30
  -3   5  11  513.55   26.50
  -3   5  11  481.55   25.60
   3  -5 -11  489.65   25.70
   3  -5 -11  506.95   26.10
  -3  -5  11  495.95   24.10
   3  -5 -11  479.35   30.10
  -3  -5  11  501.95   22.70
  -5   5  13  117.69   11.30
   5   5 -13  106.99   10.90
  -5   5  13  109.49   13.30
  -5  -5  13  117.39    6.00
   5  -5 -13  106.49   10.90
   5  -5 -13  117.49   14.00
  -5  -5  13  133.09    6.70
  -5  -5  13  122.49   11.20
  -7   5  15    2.90    8.10
   7   5 -15    5.90    5.70
  -7   5  15    2.20    4.80
   7  -5 -15   16.70    5.30
   7  -5 -15    2.90    5.90
  -7  -5  15    1.30    6.00
  -9   5  17    4.00    6.10
   9   5 -17    6.60    6.90
   9  -5 -17   13.80    9.00
  -9  -5  17    1.60    9.60
   9  -5 -17    8.20    5.40
  11   5 -19   87.79   15.40
 -11   5  19   61.69   12.20
  11  -5 -19   52.79   14.10
  11  -5 -19   64.49   10.20
 -12   6   4  389.96   34.70
  12   6  -4  332.17   16.40
  12   6  -4  346.77   16.70
  12   6  -4  347.87   28.40
  12  -6  -4  398.46   27.00
  12  -6  -4  384.16   33.30
 -10   6   2   23.50   12.00
  10   6  -2   24.00    5.50
  10   6  -2    4.50    8.10
  10   6  -2   27.30    8.80
  10   6  -2   33.10    7.70
  10  -6  -2   30.20    9.30
  10  -6  -2   22.90   11.20
  -8   6   0   19.30    8.00
   8   6   0   21.20    7.50
   8   6   0   20.50    6.60
   8   6   0   33.20    9.70
  -8   6   0   53.49   11.70
   8  -6   0   24.30    9.30
   8  -6   0   11.40    6.30
  -6   6  -2   40.50    9.20
   6   6   2   68.99   10.40
   6   6   2   69.59    9.50
   6   6   2   45.30   12.20
  -6   6  -2   68.69   12.00
   6   6   2   69.89    8.30
   6  -6   2   46.90    9.60
   6  -6   2   65.79   11.90
  -6  -6  -2   63.79   10.30
  -4   6  -4   48.40    8.30
   4   6   4   51.09    6.30
   4   6   4   70.49    8.10
   4   6   4   60.19    9.90
   4  -6   4   58.39   10.30
   4  -6   4   53.29    8.50
  -4  -6  -4   51.79    8.20
   4  -6   4   53.29    7.80
   4  -6   4   42.60    9.80
  -2   6  -6    1.40    3.20
  -2   6  -6   -1.30    3.30
   2   6   6    7.20    3.40
   2   6   6   -2.60    4.40
   2   6   6    5.40    2.50
   2  -6   6    1.90    3.10
   2  -6   6    2.20    2.70
  -2  -6  -6    0.40    2.80
  -2  -6  -6    0.80    1.80
   2  -6   6    0.10    3.40
  -2  -6  -6   -1.00    4.70
   2  -6   6    0.80    2.70
   0   6  -8  197.08   13.00
   0   6  -8  175.48   14.30
   0   6  -8  165.48   10.20
   0   6   8  141.79   12.20
   0   6   8  164.98   10.80
   0   6   8  195.38   15.30
   0  -6   8  159.58   10.60
   0  -6   8  176.38   12.60
   0  -6  -8  139.99   14.30
   0  -6  -8  165.08   12.60
   0  -6   8  172.68   13.90
   0  -6  -8  149.69   10.90
  -2   6  10   94.39    9.60
  -2   6  10   97.49   11.60
   2   6 -10   94.99    8.80
   2   6 -10  103.69    8.80
   2   6 -10  119.49   15.90
   2  -6 -10   78.79   11.80
  -2  -6  10   86.69    7.40
   2  -6 -10  102.09    9.90
   2  -6 -10   93.29    9.00
  -2  -6  10   93.69    8.50
  -4   6  12  554.24   31.60
   4   6 -12  581.14   27.10
   4   6 -12  605.44   29.00
  -4   6  12  587.84   30.90
  -4  -6  12  567.74   28.40
   4  -6 -12  597.64   31.20
  -4  -6  12  599.14   26.30
   4  -6 -12  599.94   36.70
   6   6 -14  581.74   31.10
  -6   6  14  552.54   31.30
   6  -6 -14  653.13   34.60
  -6  -6  14  603.94   31.50
   6  -6 -14  565.14   31.20
   8   6 -16   35.70    8.90
  -8   6  16   29.30    8.60
  -8  -6  16   22.20   10.70
   8  -6 -16   33.60    9.70
   8  -6 -16   26.00    7.60
 -10   6  18   80.99   11.80
  10   6 -18   82.29   14.50
  10  -6 -18   85.39   16.00
  10  -6 -18   76.09   11.60
 -12   6  20  149.39   21.70
  12   6 -20  111.89   18.50
  12  -6 -20  117.89   14.30
  12  -6 -20  138.69   23.00
  13   7  -5  511.35   36.60
  13  -7  -5  533.35   47.00
  11   7  -3   87.69    9.60
  11   7  -3   79.99    8.10
  11   7  -3   62.99   13.40
  11  -7  -3   58.29   11.80
  11  -7  -3   86.99   16.80
   9   7  -1  352.26   24.70
   9   7  -1  358.66   23.80
   9   7  -1  374.26   21.20
   9   7  -1  400.26   26.60
  -9   7   1  344.07   27.50
   9  -7  -1  380.96   26.60
   9  -7  -1  402.16   29.20
   7   7   1   80.09   10.50
  -7   7  -1   79.29   18.30
   7   7   1   94.09   10.80
   7   7   1   66.69   17.20
  -7   7  -1   87.89   12.80
   7   7   1   81.69   12.70
   7  -7   1   95.49   13.60
  -7  -7  -1  115.59   15.30
   7  -7   1  116.59   15.90
   5   7   3  290.37   16.20
  -5   7  -3  292.37   20.90
   5   7   3  256.27   25.20
  -5   7  -3  310.07   20.60
   5   7   3  282.07   16.80
   5   7   3  262.97   17.50
   5  -7   3  293.57   22.20
  -5  -7  -3  256.87   18.90
   5  -7   3  284.47   18.80
   5  -7   3  285.57   19.90
   5  -7   3  298.37   20.60
   3   7   5  615.54   28.20
   3   7   5  648.74   31.50
  -3   7  -5  598.64   32.50
   3  -7   5  581.14   30.30
  -3  -7  -5  619.04   27.10
   3  -7   5  567.34   32.10
  -3  -7  -5  624.24   37.80
  -3  -7  -5  616.64   31.50
   3  -7   5  631.04   31.30
  -1   7  -7   17.80    6.10
   1   7   7   35.80    9.50
   1   7   7   28.70    4.60
  -1   7  -7   30.30    6.40
   1   7   7   39.70    7.40
   1  -7   7   38.50    5.30
   1  -7   7   18.70    4.50
   1  -7   7   34.70    7.20
  -1  -7  -7   31.70    8.50
   1  -7   7   26.50    6.70
  -1  -7  -7   28.00    4.80
  -1  -7  -7   22.40    6.10
   1   7  -9 1398.46   64.09
   1   7  -9 1287.97   54.69
  -1   7   9 1312.77   58.99
  -1   7   9 1272.67   56.09
  -1   7   9 1357.86   63.29
  -1  -7   9 1355.26   57.69
   1  -7  -9 1344.47   60.99
   1  -7  -9 1332.87   63.69
  -1  -7   9 1273.47   54.39
   1  -7  -9 1307.17   56.29
  -3   7  11  420.26   23.90
   3   7 -11  412.26   21.90
  -3   7  11  424.16   24.60
   3   7 -11  409.46   21.60
   3  -7 -11  409.56   28.90
   3  -7 -11  411.86   23.70
  -3  -7  11  439.46   20.90
  -3  -7  11  407.36   21.20
   3  -7 -11  402.56   24.40
   5   7 -13   15.60    5.50
  -5   7  13   10.00    5.80
  -5   7  13    8.10    6.30
   5   7 -13   11.70    4.10
  -5  -7  13   14.30    3.50
  -5  -7  13   11.50    5.20
   5  -7 -13    7.50    5.20
   5  -7 -13    6.70    5.50
   5  -7 -13    1.10    8.30
   7   7 -15  212.18   16.60
  -7   7  15  219.18   18.60
  -7   7  15  173.28   22.80
   7  -7 -15  185.98   16.40
   7  -7 -15  164.28   19.00
  -7  -7  15  231.88   18.10
   9   7 -17  119.59   16.30
  -9   7  17  140.19   17.30
   9  -7 -17  109.09   14.10
   9  -7 -17  142.89   20.00
  -9  -7  17  117.39   17.20
  11   7 -19  183.18   22.20
 -11   7  19  220.08   23.20
  11  -7 -19  228.68   19.80
  11  -7 -19  212.98   26.10
  12   8  -4   23.70    3.90
  12   8  -4   54.79   23.90
  12   8  -4   19.00    3.80
  12   8  -4   17.70   10.30
  12  -8  -4   50.99   15.50
  12  -8  -4   30.20   11.10
  10   8  -2   65.19   12.30
  10   8  -2   62.29   19.90
  10   8  -2   91.09   10.80
  10   8  -2   86.99   13.30
  10   8  -2   74.59   12.40
  10  -8  -2   76.09   13.50
  10  -8  -2  104.79   17.90
   8   8   0   14.20    5.40
   8   8   0   18.00    6.30
   8   8   0   33.80   14.70
  -8   8   0   41.00   10.10
  -8   8   0   24.40   10.40
   8   8   0   36.30    6.80
   8   8   0   27.40    9.30
   8  -8   0   25.80    9.30
   8  -8   0   28.90   12.90
   8  -8   0   35.80   10.00
   6   8   2   17.00    5.20
  -6   8  -2   28.60    7.30
   6   8   2   37.90    7.10
   6   8   2   26.20    6.20
  -6   8  -2   24.20    9.10
   6   8   2   25.70   10.20
   6  -8   2   14.10    8.30
   6  -8   2   21.20    7.10
   6  -8   2   16.00    7.20
  -6  -8  -2   20.10    6.50
   4   8   4   53.49    6.80
   4   8   4   71.59   13.80
   4   8   4   51.99    8.30
   4   8   4   67.59    6.60
  -4   8  -4   63.89   10.90
   4  -8   4   68.89   12.10
   4  -8   4   35.30    8.60
  -4  -8  -4   62.79    9.60
   4  -8   4   52.69    8.60
   4  -8   4   72.19    9.20
  -2   8  -6  106.69   14.10
  -2   8  -6  123.79   12.20
   2   8   6   85.19   14.70
   2   8   6  118.59    8.40
   2   8   6  139.09   12.20
  -2  -8  -6  119.99    7.90
  -2  -8  -6  117.59   16.70
   2  -8   6  127.59   14.30
   2  -8   6  132.49   13.80
   2  -8   6  121.69   10.20
   2  -8   6  129.59    9.50
   0   8   8   45.30    5.90
   0   8   8   51.69   11.30
   0   8  -8   41.30    7.50
   0   8   8   42.20    7.90
   0   8  -8   36.30    9.40
   0   8  -8   46.00    5.50
   0  -8  -8   47.00    6.70
   0  -8   8   46.80    9.90
   0  -8  -8   45.60    8.30
   0  -8   8   56.49    8.80
   0  -8   8   59.49    6.50
   0  -8  -8   69.89   13.70
  -2   8  10  211.88   15.60
  -2   8  10  170.08   17.80
   2   8 -10  145.39   19.80
   2   8 -10  200.48   13.80
   2   8 -10  155.28   11.10
  -2   8  10  158.38   12.80
  -2  -8  10  190.48   10.80
   2  -8 -10  211.88   13.90
   2  -8 -10  198.38   19.60
   2  -8 -10  161.68   14.50
  -2  -8  10  162.88   13.00
  -4   8  12   67.39   11.10
   4   8 -12   83.19    9.20
   4   8 -12   91.29   10.00
  -4   8  12   62.59   10.40
   4   8 -12   90.39   18.10
   4  -8 -12   72.59   15.70
  -4  -8  12   88.89    9.20
   4  -8 -12   57.19    9.50
   4  -8 -12   64.89    9.90
  -4  -8  12   84.99    8.10
   6   8 -14    5.50    3.70
  -6   8  14    2.10    6.40
  -6   8  14   -0.70    6.50
   6  -8 -14  -10.20    8.30
   6  -8 -14    3.10    5.50
   6  -8 -14    9.20    6.40
  -6  -8  14    5.70    3.00
  -6  -8  14    5.60    5.30
   8   8 -16   17.60    7.50
  -8   8  16   29.90   10.70
   8  -8 -16   28.90    8.90
   8  -8 -16   41.10   12.60
  -8  -8  16   27.30    9.10
 -10   8  18   33.80   12.90
  10   8 -18   59.89   12.10
  10  -8 -18   43.20   14.10
  10  -8 -18   46.70   10.40
  12   8 -20   -9.90   10.70
  12  -8 -20   -2.20    8.30
  12  -8 -20   -2.10   10.40
  13   9  -5  -12.20   10.20
  13   9  -5    1.40   22.40
  13  -9  -5    7.10   10.00
  13  -9  -5    3.80   13.20
  11   9  -3    8.20    5.10
  11   9  -3    4.80    7.50
  11   9  -3   -0.70   15.30
  11   9  -3   -5.90    5.90
  11   9  -3  -12.80    7.90
  11  -9  -3   -1.90   11.00
  11  -9  -3   20.70    8.90
   9   9  -1   57.29    9.50
   9   9  -1   64.79   21.10
   9   9  -1   67.49   16.30
   9   9  -1   57.19   11.50
   9   9  -1   66.19    9.70
   9  -9  -1   53.59   12.70
   7   9   1   89.09   10.10
   7   9   1  103.89   11.30
  -7   9  -1   87.09   14.20
  -7   9  -1   86.09   15.20
   7   9   1  112.39   21.60
   7   9   1  100.89   11.70
   7  -9   1   65.29   15.70
   7  -9   1   78.49   13.20
   7  -9   1   77.29   12.80
  -7  -9  -1   85.09   12.80
  -5   9  -3    1.70    6.00
   5   9   3    5.80    3.30
   5   9   3    2.40    3.20
   5   9   3    6.10    7.70
   5   9   3   11.20    6.10
   5  -9   3    3.60    4.90
   5  -9   3   12.90    6.80
   5  -9   3    2.40    5.40
  -5  -9  -3   -2.60    4.20
   5  -9   3    2.90    6.90
   3   9   5  122.99    8.50
   3   9   5   99.39   16.70
  -3   9  -5  145.79   14.10
   3   9   5  115.39   12.00
   3   9   5  116.79    8.70
   3  -9   5  110.59   10.90
   3  -9   5  111.19   14.00
  -3  -9  -5  134.89   13.30
  -3  -9  -5  129.29   20.30
   3  -9   5  138.99   16.70
   3  -9   5  124.49   10.20
  -1   9  -7   57.19   11.90
   1   9   7   56.99   10.10
   1   9   7   31.90   10.30
   1   9   7   47.80    5.70
  -1   9  -7   33.80    7.20
  -1  -9  -7   42.20    6.10
  -1  -9  -7   32.40   10.10
   1  -9   7   36.10    5.60
   1  -9   7   33.80    8.70
  -1  -9  -7   75.59   11.10
   1  -9   7   52.89    9.40
   1  -9   7   44.20    5.80
  -1   9   9   32.50    9.10
  -1   9   9   44.40    6.80
   1   9  -9   29.90    6.90
   1   9  -9   36.60    4.90
  -1   9   9   23.60    7.20
  -1  -9   9   19.60    7.30
  -1  -9   9   37.80    8.50
  -1  -9   9   46.60    5.50
   1  -9  -9   22.30    9.60
   1  -9  -9   40.80    8.10
   1  -9  -9   32.00    5.80
  -3   9  11    3.30    4.30
   3   9 -11   14.70    4.70
   3   9 -11   11.30    3.80
  -3   9  11   22.20    7.80
   3   9 -11   -0.10    8.90
  -3  -9  11   15.60    3.50
   3  -9 -11   12.40    9.20
   3  -9 -11   12.30    5.40
   3  -9 -11   11.30    5.80
  -3  -9  11    6.70    4.40
  -5   9  13    2.80    5.90
   5   9 -13    5.90    9.80
   5   9 -13    1.30    4.00
  -5   9  13  -12.10    4.90
   5   9 -13   -9.20    2.90
   5  -9 -13    2.30    4.50
   5  -9 -13   -3.90    5.30
  -5  -9  13   -3.60    3.40
   5  -9 -13    9.70   10.20
   7   9 -15   21.50    7.60
  -7   9  15   25.40    8.80
   7   9 -15   24.80   15.70
   7   9 -15   15.90    4.10
   7  -9 -15   23.10   10.00
  -7  -9  15   26.30    7.60
   7  -9 -15   23.70    7.60
   9   9 -17   59.19   11.00
  -9   9  17   54.29   16.20
   9  -9 -17   52.19   10.60
   9  -9 -17   83.29   15.00
  -9  -9  17   74.39   14.90
  11   9 -19   11.20    9.80
  11  -9 -19   14.40   11.00
  11  -9 -19   25.60   10.50
  12  10  -4    2.60   10.20
  12  10  -4   12.90    4.70
  12 -10  -4   37.80   14.40
  12 -10  -4   13.90    9.90
  10  10  -2   39.10   10.20
  10  10  -2   21.10   17.60
  10  10  -2   31.50    9.20
  10  10  -2   28.40    7.70
  10 -10  -2   10.80    8.70
  10 -10  -2   33.80   12.40
   8  10   0  539.05   28.80
   8  10   0  608.24   75.49
   8  10   0  503.05   27.70
   8  10   0  519.75   28.70
  -8 -10   0  508.65   32.60
   8 -10   0  461.85   33.00
   8 -10   0  500.35   33.60
  -6  10  -2    0.60    7.20
   6  10   2    8.70    9.90
  -6  10  -2   -4.90    6.20
   6  10   2    2.60    3.70
   6  10   2    2.20    3.30
   6  10   2   -1.90    5.00
   6 -10   2    8.30    6.30
  -6 -10  -2   11.20    6.60
   6 -10   2   -4.90    8.20
   6 -10   2    1.50    6.30
   6 -10   2   -4.10    5.90
   4  10   4  998.60   45.50
   4  10   4 1124.39   51.79
  -4  10  -4  953.70   56.69
   4  10   4 1156.38   62.69
   4  10   4 1096.59   45.00
   4 -10   4 1023.70   56.29
  -4 -10  -4 1125.19   52.69
   4 -10   4 1121.49   49.50
   4 -10   4 1096.59   50.59
   4 -10   4 1113.49   53.89
   2  10   6   82.09   16.20
   2  10   6   58.39   10.70
  -2  10  -6   65.09   11.30
  -2  10  -6   64.49   13.30
   2  10   6   63.59    5.60
   2 -10   6   46.50   11.20
  -2 -10  -6   51.29    9.50
   2 -10   6   65.69    8.20
   2 -10   6   69.79   11.40
   2 -10   6   80.59    8.70
  -2 -10  -6   65.69    5.30
  -2 -10  -6   84.49   17.10
   0  10   8    5.50    5.50
   0  10  -8   10.40    6.10
   0  10  -8    2.80    7.80
   0  10   8   10.70    7.00
   0  10   8   13.20    4.10
   0 -10  -8   13.70    4.40
   0 -10   8    0.80    6.80
   0 -10   8   11.50    6.20
   0 -10   8    7.90    3.30
   0 -10  -8   10.10    5.10
   0 -10  -8   10.60    7.00
   0 -10   8   11.80    3.60
  -2  10  10   57.49   11.10
   2  10 -10   77.99   10.40
   2  10 -10   75.19   15.90
  -2  10  10   56.79   12.40
   2  10 -10   58.49    5.60
  -2  10  10   68.29    9.50
   2 -10 -10   76.79   16.20
   2 -10 -10   63.89   10.50
  -2 -10  10   59.99    5.40
  -2 -10  10   66.39    9.50
   2 -10 -10   59.69    8.40
  -4  10  12   22.00    8.00
   4  10 -12   23.60    5.80
  -4  10  12   35.00    9.70
   4  10 -12   14.50    5.10
   4  10 -12   17.30   11.60
  -4 -10  12   15.90    4.00
   4 -10 -12   14.80    6.00
  -4 -10  12   13.10    5.10
   4 -10 -12   28.40   11.20
   4 -10 -12   12.70    5.90
  -6  10  14  516.65   32.70
  -6  10  14  432.06   31.50
   6  10 -14  445.46   43.20
   6  10 -14  463.35   26.20
   6  10 -14  451.05   24.90
   6 -10 -14  492.05   31.20
  -6 -10  14  506.25   24.90
   6 -10 -14  549.74   31.70
  -6 -10  14  488.55   26.30
   8  10 -16   10.70    6.60
   8  10 -16   -1.10   15.80
   8 -10 -16   12.70    8.80
  -8 -10  16   13.10    8.50
   8 -10 -16    8.40    8.10
  10  10 -18  306.17   47.80
  10  10 -18  527.35   32.40
  10 -10 -18  484.55   36.60
  10 -10 -18  461.15   36.00
  11  11  -3   40.10   11.20
  11  11  -3   51.49   23.00
  11  11  -3   63.19   12.20
  11  11  -3   63.09    8.80
  11  11  -3   47.10   11.80
  11 -11  -3   58.39   16.70
  11 -11  -3   54.39   13.70
   9  11  -1   -2.10    6.00
   9  11  -1   11.10   11.70
   9  11  -1    1.20    5.80
   9  11  -1    3.80   16.20
   9 -11  -1   -5.60    8.80
   9 -11  -1   13.70    8.80
  -7  11  -1    3.30    8.00
   7  11   1   -0.80    5.40
   7  11   1   -4.90    3.60
   7  11   1   -0.30   10.80
   7  11   1    9.00    4.90
   7 -11   1    5.70    6.40
   7 -11   1    0.80    6.30
   7 -11   1    0.90   11.20
   7 -11   1   10.50    7.90
  -7 -11  -1   12.40    7.20
   5  11   3    0.60    5.30
   5  11   3   24.30    4.80
   5  11   3   17.10   11.20
   5  11   3   14.10    3.80
  -5  11  -3    9.10    7.20
   5 -11   3   13.60   10.70
   5 -11   3    8.90    7.20
   5 -11   3   15.00    5.70
   5 -11   3   11.30    6.80
  -5 -11  -3    6.80    6.40
   3  11   5   74.09    5.30
  -3  11  -5   83.79   15.60
   3  11   5  110.09   18.80
   3  11   5   64.69    5.30
  -3  11  -5   88.79   14.20
   3  11   5   71.59   11.30
   3 -11   5   66.89   13.10
   3 -11   5   87.39   10.00
   3 -11   5   77.29   10.10
   3 -11   5   60.69   13.40
  -3 -11  -5   78.09   18.70
  -3 -11  -5   83.89   13.00
   1  11   7  135.29   19.90
  -1  11  -7   90.29   13.30
   1  11   7  145.99   16.40
  -1  11  -7  112.39   18.10
   1  11   7  118.89    8.30
  -1 -11  -7  112.99    8.60
   1 -11   7  110.79   16.70
   1 -11   7  125.19    9.30
   1 -11   7  112.69   15.10
  -1 -11  -7  113.09   15.40
   1 -11   7  112.09    9.20
  -1 -11  -7  123.69   21.70
   1  11  -9   42.10    8.90
  -1  11   9   33.30   10.90
  -1  11   9   37.80    7.60
   1  11  -9   38.70   13.20
  -1 -11   9   36.70    4.30
  -1 -11   9   37.80   12.30
   1 -11  -9   26.90    8.50
   1 -11  -9   34.40    6.70
  -1 -11   9   38.10    4.50
  -1 -11   9   34.60    8.60
   3  11 -11   12.80   11.20
  -3  11  11   17.30    8.10
  -3  11  11    6.90    5.70
   3  11 -11   15.50    3.50
   3  11 -11   13.20    5.90
   3 -11 -11   12.80    5.20
   3 -11 -11   24.00   11.00
  -3 -11  11   15.30    5.60
   3 -11 -11    3.80    5.80
  -3 -11  11   14.20    3.10
  -5  11  13  350.96   26.30
   5  11 -13  363.46   22.10
   5  11 -13  428.56   39.30
   5  11 -13  363.46   21.10
  -5  11  13  358.36   27.60
   5 -11 -13  382.96   25.40
  -5 -11  13  373.56   21.80
   5 -11 -13  346.07   26.00
  -5 -11  13  360.26   19.60
   7  11 -15   13.50    6.40
   7  11 -15   12.50   15.00
   7  11 -15   24.30    5.90
   7 -11 -15    3.50    6.60
   7 -11 -15   -3.90    5.90
  -7 -11  15   15.10    5.80
  -7 -11  15    5.40    6.40
   9  11 -17   63.49   27.50
   9  11 -17   32.80    9.90
   9 -11 -17   25.80   11.60
  -9 -11  17   32.20   11.80
   9 -11 -17   37.80   10.90
  11  11 -19  -16.80   27.20
  11 -11 -19   18.60   11.60
  11 -11 -19   30.30   13.30
  10  12  -2   23.90    8.70
  10  12  -2   27.60   14.20
  10  12  -2    6.80    6.70
  10  12  -2   44.10   21.80
  10  12  -2   13.70    8.90
  10 -12  -2    8.00    9.50
  10 -12  -2   10.20   11.10
   8  12   0    7.40    5.00
   8  12   0    2.80    6.80
   8  12   0    4.40   15.70
   8  12   0   -7.20    4.80
   8 -12   0   12.00    8.10
   8 -12   0    3.50    8.80
  -8 -12   0    5.60    7.30
   6  12   2   30.30   14.10
   6  12   2   33.20    7.90
   6  12   2   18.30    4.70
   6  12   2   29.40    4.70
   6 -12   2   30.50   10.30
   6 -12   2   21.50    7.70
   6 -12   2   33.10   13.00
   6 -12   2   25.30    7.40
  -6 -12  -2    7.80    6.90
  -4  12  -4   12.10    9.30
   4  12   4    7.60    8.10
   4  12   4   15.40    7.30
   4 -12   4    6.10   10.50
   4 -12   4   -0.70    3.80
   4 -12   4   17.60    8.20
   4 -12   4    4.40    5.30
  -4 -12  -4   19.00    7.10
  -2  12  -6  635.54   37.80
  -2  12  -6  605.34   40.90
   2  12   6  557.94   39.60
   2  12   6  690.23   44.90
   2  12   6  651.63   27.10
   2 -12   6  690.43   38.20
  -2 -12  -6  659.03   46.50
   2 -12   6  646.94   41.60
   2 -12   6  669.73   32.40
  -2 -12  -6  687.93   37.60
   2 -12   6  650.53   31.60
   0  12   8   15.10   10.30
   0  12  -8   14.80    7.30
   0  12   8    6.80    7.60
   0  12  -8   13.30    9.70
   0  12   8   13.10    4.40
   0 -12   8    7.60    8.80
   0 -12  -8   -8.00    8.40
   0 -12  -8   13.10    4.80
   0 -12   8   10.10    7.20
   0 -12   8   13.70    3.70
   0 -12  -8    5.20    6.10
   0 -12   8   10.90    3.10
  -2  12  10  490.15   28.10
  -2  12  10  509.05   32.80
   2  12 -10  535.05   40.50
  -2  12  10  536.25   38.60
   2  12 -10  580.94   31.80
   2 -12 -10  513.05   32.50
  -2 -12  10  496.35   30.20
   2 -12 -10  523.55   27.80
   2 -12 -10  514.55   40.60
   4  12 -12  657.43   28.70
   4  12 -12  688.13   50.39
  -4  12  12  664.33   37.10
   4  12 -12  619.64   34.80
  -4 -12  12  650.83   28.20
   4 -12 -12  706.53   40.00
  -4 -12  12  668.73   35.00
   4 -12 -12  665.53   36.10
   6  12 -14  154.78   14.70
   6  12 -14  171.38   14.20
   6 -12 -14  182.78   21.40
  -6 -12  14  155.38   12.70
  -6 -12  14  174.78   14.50
   6 -12 -14  134.99   16.80
   8  12 -16  107.59   10.20
   8  12 -16   77.19   28.50
   8  12 -16   89.29   12.60
   8 -12 -16   85.59   15.10
  -8 -12  16   91.49   12.30
  -8 -12  16  113.29    9.00
   8 -12 -16   81.59   15.20
  10  12 -18   59.39   32.20
  10  12 -18   22.90   10.20
  10 -12 -18   18.80   11.30
 -10 -12  18   -2.60   14.50
  10 -12 -18    2.80   11.40
  11  13  -3   10.90    8.60
  11  13  -3    3.30   12.40
  11  13  -3    5.70   23.60
  11 -13  -3   35.40   14.40
  11 -13  -3    3.70   10.10
   9  13  -1  315.77   44.40
   9  13  -1  346.97   26.90
   9  13  -1  397.66   22.80
   9  13  -1  405.06   23.50
   9 -13  -1  477.35   33.60
  -9 -13   1  434.56   31.90
   9 -13  -1  448.46   33.50
   7  13   1    4.50   12.70
   7  13   1   19.10    4.40
   7  13   1   15.80    9.90
   7  13   1   22.60    4.90
   7 -13   1   32.20   10.40
  -7 -13  -1   12.90    8.50
   7 -13   1   22.90    9.30
   5  13   3   38.30   15.70
   5  13   3   22.20    9.10
   5 -13   3   18.00   11.70
   5 -13   3   18.30    6.80
  -5 -13  -3    8.00    8.20
   5 -13   3    9.40    7.40
   5 -13   3   14.80    6.70
   3  13   5  207.58   27.90
  -3  13  -5  261.27   25.40
   3  13   5  255.67   21.20
   3 -13   5  236.78   21.80
   3 -13   5  221.68   26.30
   3 -13   5  225.88   16.10
  -3 -13  -5  238.68   21.00
   3 -13   5  233.48   16.50
   1  13   7   24.10    4.00
  -1  13  -7    9.20    8.10
   1  13   7    8.60    9.90
   1  13   7    4.70    7.70
  -1  13  -7   27.80   10.20
   1 -13   7   13.60    4.00
  -1 -13  -7   26.00   13.00
  -1 -13  -7   27.40    9.80
  -1 -13  -7   24.50    3.90
   1 -13   7   11.50    6.60
   1 -13   7   21.70    5.10
   1  13  -9  487.95   31.30
  -1  13   9  489.25   37.90
  -1  13   9  538.55   29.20
   1  13  -9  470.45   38.10
  -1 -13   9  467.55   30.20
   1 -13  -9  520.75   26.30
   1 -13  -9  472.05   31.60
  -1 -13   9  445.96   36.90
  -3  13  11  100.19   13.00
   3  13 -11   91.59   20.70
   3  13 -11  111.69   13.80
  -3 -13  11   74.29   12.20
   3 -13 -11  113.69   17.00
   3 -13 -11  100.69   12.80
   5  13 -13  771.22   33.10
   5  13 -13  812.72   60.19
   5  13 -13  779.92   41.20
  -5  13  13  810.52   44.30
  -5 -13  13  784.52   32.80
   5 -13 -13  812.42   42.70
  -5 -13  13  781.52   40.50
   5 -13 -13  767.72   46.00
   7  13 -15    6.00    6.00
   7  13 -15    2.70    6.80
   7  13 -15   13.30   18.40
  -7 -13  15    8.70    7.20
   7 -13 -15    4.50    8.20
  -7 -13  15    8.10    6.20
   7 -13 -15    3.70    7.90
   9  13 -17   57.79   11.60
   9  13 -17   34.60   24.30
   9 -13 -17   42.60   15.40
   9 -13 -17   62.19   15.60
  -9 -13  17   43.90   13.00
  10  14  -2   60.59   10.10
  10  14  -2   90.89   21.40
  10  14  -2   63.59   28.30
  10 -14  -2   70.59   17.90
  10 -14  -2   85.99   17.80
   8  14   0  127.59   10.40
   8  14   0  103.59   24.10
   8  14   0  141.29    9.20
   8  14   0  124.09   16.90
   8 -14   0  136.89   21.80
   8 -14   0  140.69   19.70
  -8 -14   0  133.19   18.10
   6  14   2   48.20   10.80
   6  14   2   46.60   17.90
   6 -14   2   29.10   10.80
  -6 -14  -2   27.10    9.70
   6 -14   2   31.90    9.60
   6 -14   2   37.50    9.40
   4  14   4   48.20   19.10
   4  14   4   39.20    9.90
   4 -14   4   36.40   12.00
   4 -14   4   41.40    8.60
  -4 -14  -4   42.40   11.30
   4 -14   4   34.40    8.00
  -2  14  -6   30.10   11.90
   2  14   6   38.50   14.60
  -2 -14  -6   34.70   10.40
   2 -14   6   46.60   11.30
   2 -14   6   39.40    7.30
   2 -14   6   68.19   15.60
   0  14  -8  197.78   22.00
   0  14  -8  255.27   30.20
   0  14   8  225.78   13.70
   0  14   8  248.98   29.30
   0 -14  -8  214.68   14.10
   0 -14   8  197.48    9.90
   0 -14   8  206.78   20.10
   0 -14   8  246.18   10.60
   0 -14  -8  211.18   20.70
   0 -14   8  244.18   29.50
  -2  14  10  439.56   25.40
   2  14 -10  441.96   39.20
   2  14 -10  460.65   30.10
  -2  14  10  408.06   41.40
  -2 -14  10  426.06   28.60
   2 -14 -10  395.26   31.20
   4  14 -12   11.30   15.00
   4  14 -12    6.90    8.10
  -4  14  12    3.40    8.70
  -4 -14  12   10.30    7.10
   4 -14 -12    1.70    7.40
   4 -14 -12   19.60    7.80
   6  14 -14   17.00   16.60
   6  14 -14   31.80    3.20
   6  14 -14   43.50    9.50
   6 -14 -14   41.80   12.00
   6 -14 -14   25.50    9.70
  -6 -14  14   28.00    8.90
   8  14 -16   20.20    8.00
   8  14 -16   29.30   22.80
  -8 -14  16   25.50    8.00
   8 -14 -16   25.90   11.90
   8 -14 -16   27.00   10.40
   9  15  -1   21.40   24.10
   9  15  -1   79.69   14.60
   9 -15  -1   89.19   16.40
  -9 -15   1   95.39   17.50
   9 -15  -1  122.59   19.70
   7  15   1   92.09   23.50
   7 -15   1  128.19   16.80
   7 -15   1  112.99   19.40
  -7 -15  -1  114.29   17.70
   5  15   3   39.90   16.00
   5 -15   3   35.20   11.80
  -5 -15  -3   34.20   10.90
   5 -15   3   36.70   10.30
   5 -15   3   39.90   10.30
   3  15   5    1.10   10.90
  -3  15  -5   13.00   10.40
  -3 -15  -5   17.00    8.20
   3 -15   5    5.50    7.60
   3 -15   5    3.40    5.10
   3 -15   5   10.70    5.90
   1  15   7   57.39   15.50
  -1  15  -7   87.89   18.30
   1 -15   7   53.89   12.70
   1 -15   7   85.19    7.80
  -1 -15  -7   61.09   15.30
   1 -15   7   73.79    6.70
   1  15  -9  638.14   46.20
  -1  15   9  505.15   42.70
   1 -15  -9  514.55   36.20
   1 -15  -9  545.55   28.40
  -1 -15   9  539.55   34.70
  -3  15  11  122.19   14.90
   3  15 -11  106.59   14.90
  -3 -15  11   80.09   13.50
   3 -15 -11   84.09   14.10
   3 -15 -11  124.59   14.10
   5  15 -13  145.89   16.90
  -5  15  13   82.09   16.10
   5  15 -13  109.89   25.80
   5 -15 -13  164.98   18.50
   5 -15 -13  116.69   18.50
  -5 -15  13  126.49   16.00
   7  15 -15    3.10    9.60
   7  15 -15   24.50   22.20
  -7 -15  15   -4.50    7.40
   7 -15 -15    3.50   10.00
   7 -15 -15   -1.60    8.80
   8  16   0   87.09   25.70
   8 -16   0   93.99   17.80
   8 -16   0   89.59   18.70
  -8 -16   0   88.49   16.10
   6  16   2   -7.80   15.00
   6 -16   2   34.80   11.60
   6 -16   2   40.00   13.90
  -6 -16  -2   36.80   12.90
   6 -16   2   47.40   11.90
   4  16   4  121.99   26.20
   4 -16   4   89.79   16.80
  -4 -16  -4  102.69   17.90
   4 -16   4   90.49   12.10
   4 -16   4   86.39   12.00
  -2  16  -6   61.29   18.40
   2  16   6   36.40   14.90
   2 -16   6   58.69    7.40
   2 -16   6   69.49   13.50
  -2 -16  -6   52.79   13.80
   2 -16   6   58.39    7.90
   0  16   8   93.29   20.30
   0  16  -8   87.99   21.70
   0  16   8   84.49    8.00
   0 -16   8  108.79   16.60
   0 -16  -8   97.39    7.90
   0 -16  -8  108.19   18.30
  -2  16  10    0.20    6.60
  -2  16  10   17.30   13.60
   2  16 -10    8.80   12.30
  -2 -16  10   -0.10    7.10
   2 -16 -10   16.80    9.20
  -4  16  12   99.89   16.30
   4  16 -12  115.39   29.20
  -4 -16  12  127.69   17.70
   4 -16 -12  116.89   15.60
   4 -16 -12  113.49   18.60
   6  16 -14   44.60   13.10
   6  16 -14   64.49   25.00
  -6 -16  14   16.70    9.20
   6 -16 -14   13.30   10.30
   6 -16 -14   17.80   12.10
   8  16 -16   18.20   26.80
   8 -16 -16    8.90   12.60
   8 -16 -16   16.80   18.60
  -8 -16  16  -13.10    9.20
   7  17   1    0.80   19.00
  -7 -17  -1   12.80   11.00
[truncated: 936,180 more chars]
