# Supplementary material for: Selenium(IV) Polybromide Complexes: Structural Diversity Driven by Halogen and Chalcogen Bonding
Source: Molecules. 2022 Aug 22;27(16):5355. doi: 10.3390/molecules27165355 (PMC9415170; doi:10.3390/molecules27165355)
Supplement: Supplementary file 1 [file molecules-27-05355-s001.zip › 2.cif]

 
data_2

_audit_creation_method           SHELXL-2017/1
_shelx_SHELXL_version_number     2017/1
_chemical_name_systematic        ?
_chemical_name_common            ?
_chemical_melting_point          ?
_chemical_formula_moiety         ?
_chemical_formula_sum            'C12 H16 Br8 N2 Se'
_chemical_formula_weight         906.51

loop_
_atom_type_symbol
_atom_type_description
_atom_type_scat_dispersion_real
_atom_type_scat_dispersion_imag
_atom_type_scat_source
C C 0.0033 0.0016 'International Tables Vol C Tables 4.2.6.8 and 6.1.1.4'
H H 0.0000 0.0000 'International Tables Vol C Tables 4.2.6.8 and 6.1.1.4'
Br Br -0.2901 2.4595 'International Tables Vol C Tables 4.2.6.8 and 6.1.1.4'
N N 0.0061 0.0033 'International Tables Vol C Tables 4.2.6.8 and 6.1.1.4'
Se Se -0.0929 2.2259 'International Tables Vol C Tables 4.2.6.8 and 6.1.1.4'

_space_group_crystal_system      monoclinic
_space_group_IT_number           15
_space_group_name_H-M_alt        'C 2/c'
_space_group_name_Hall           '-C 2yc'

_shelx_space_group_comment       
;
The symmetry employed for this shelxl refinement is uniquely defined
by the following loop, which should always be used as a source of
symmetry information in preference to the above space-group names.
They are only intended as comments.
;

loop_
_space_group_symop_operation_xyz
'x, y, z'
'-x, y, -z+1/2'
'x+1/2, y+1/2, z'
'-x+1/2, y+1/2, -z+1/2'
'-x, -y, -z'
'x, -y, z-1/2'
'-x+1/2, -y+1/2, -z'
'x+1/2, -y+1/2, z-1/2'

_cell_length_a                   17.7961(15)
_cell_length_b                   7.4754(6)
_cell_length_c                   17.6525(17)
_cell_angle_alpha                90
_cell_angle_beta                 100.133(5)
_cell_angle_gamma                90
_cell_volume                     2311.7(4)
_cell_formula_units_Z            4
_cell_measurement_temperature    150(2)
_cell_measurement_reflns_used    4858
_cell_measurement_theta_min      2.3251
_cell_measurement_theta_max      26.9796

_exptl_crystal_description       prism
_exptl_crystal_colour            dark-red
_exptl_crystal_density_meas      ?
_exptl_crystal_density_method    ?
_exptl_crystal_density_diffrn    2.605
_exptl_crystal_F_000             1664
_exptl_transmission_factor_min   ?
_exptl_transmission_factor_max   ?
_exptl_crystal_size_max          0.100
_exptl_crystal_size_mid          0.080
_exptl_crystal_size_min          0.080
_exptl_absorpt_coefficient_mu    15.451
_shelx_estimated_absorpt_T_min   0.307
_shelx_estimated_absorpt_T_max   0.371
_exptl_absorpt_correction_type   multi-scan
_exptl_absorpt_correction_T_min  0.5397
_exptl_absorpt_correction_T_max  0.7455
_exptl_absorpt_process_details   
;
 SADABS 2016/2: Krause, L., Herbst-Irmer, R., Sheldrick G.M. & Stalke D.,
 J. Appl. Cryst. 48 (2015) 3-10
;
_exptl_absorpt_special_details   ?
_diffrn_ambient_temperature      150(2)
_diffrn_radiation_wavelength     0.71073
_diffrn_radiation_type           MoK\a
_diffrn_source                   'Incoatec IuS3.0 microfocus X-ray tube'
_diffrn_measurement_device_type  'Bruker D8 Venture diffractometer'
_diffrn_measurement_method       '\w and \f scans'
_diffrn_detector_area_resol_mean 7.41
_diffrn_reflns_number            13577
_diffrn_reflns_av_unetI/netI     0.0312
_diffrn_reflns_av_R_equivalents  0.0429
_diffrn_reflns_limit_h_min       -22
_diffrn_reflns_limit_h_max       22
_diffrn_reflns_limit_k_min       -9
_diffrn_reflns_limit_k_max       9
_diffrn_reflns_limit_l_min       -22
_diffrn_reflns_limit_l_max       22
_diffrn_reflns_theta_min         2.325
_diffrn_reflns_theta_max         27.140
_diffrn_reflns_theta_full        25.500
_diffrn_measured_fraction_theta_max 0.998
_diffrn_measured_fraction_theta_full 0.999
_diffrn_reflns_Laue_measured_fraction_max 0.998
_diffrn_reflns_Laue_measured_fraction_full 0.999
_diffrn_reflns_point_group_measured_fraction_max 0.998
_diffrn_reflns_point_group_measured_fraction_full 0.999
_reflns_number_total             2561
_reflns_number_gt                1919
_reflns_threshold_expression     'I > 2\s(I)'
_reflns_Friedel_coverage         0.000
_reflns_Friedel_fraction_max     .
_reflns_Friedel_fraction_full    .

_reflns_special_details          
;
 Reflections were merged by SHELXL according to the crystal
 class for the calculation of statistics and refinement.
 
 _reflns_Friedel_fraction is defined as the number of unique
 Friedel pairs measured divided by the number that would be
 possible theoretically, ignoring centric projections and
 systematic absences.
;
_computing_data_collection       'APEX3 (Bruker-AXS, 2016)'
_computing_cell_refinement       'SAINT (Bruker-AXS, 2016)'
_computing_data_reduction        'SAINT (Bruker-AXS, 2016)'
_computing_structure_solution    'SHELXT 2014/5 (Sheldrick, 2014)'
_computing_structure_refinement  'SHELXL-2017/1 (Sheldrick, 2017)'
_computing_molecular_graphics    ?
_computing_publication_material  ?
_refine_special_details          ?
_refine_ls_structure_factor_coef Fsqd
_refine_ls_matrix_type           full
_refine_ls_weighting_scheme      calc
_refine_ls_weighting_details     
'w=1/[\s^2^(Fo^2^)+(0.0488P)^2^+18.2931P] where P=(Fo^2^+2Fc^2^)/3'
_atom_sites_solution_primary     ?
_atom_sites_solution_secondary   ?
_atom_sites_solution_hydrogens   mixed
_refine_ls_hydrogen_treatment    constr
_refine_ls_extinction_method     none
_refine_ls_extinction_coef       .
_refine_ls_number_reflns         2561
_refine_ls_number_parameters     124
_refine_ls_number_restraints     36
_refine_ls_R_factor_all          0.0657
_refine_ls_R_factor_gt           0.0464
_refine_ls_wR_factor_ref         0.1250
_refine_ls_wR_factor_gt          0.1162
_refine_ls_goodness_of_fit_ref   1.093
_refine_ls_restrained_S_all      1.099
_refine_ls_shift/su_max          0.000
_refine_ls_shift/su_mean         0.000

loop_
_atom_site_label
_atom_site_type_symbol
_atom_site_fract_x
_atom_site_fract_y
_atom_site_fract_z
_atom_site_U_iso_or_equiv
_atom_site_adp_type
_atom_site_occupancy
_atom_site_site_symmetry_order
_atom_site_calc_flag
_atom_site_refinement_flags_posn
_atom_site_refinement_flags_adp
_atom_site_refinement_flags_occupancy
_atom_site_disorder_assembly
_atom_site_disorder_group
Br1 Br 0.09188(4) 0.80943(9) 0.15293(5) 0.0590(2) Uani 1 1 d . . . . .
Br2 Br 0.08268(5) 0.55287(10) 0.32947(4) 0.0611(2) Uani 1 1 d . . . . .
Br5A Br -0.09169(13) 1.0361(4) 0.15904(14) 0.0528(6) Uani 0.5 1 d . . P . .
Br5B Br -0.06812(14) 1.0510(4) 0.18872(14) 0.0558(6) Uani 0.5 1 d . . P . .
Se1 Se 0.000000 0.81389(11) 0.250000 0.0506(3) Uani 1 2 d S T P . .
N1 N 0.0984(5) 0.3357(8) 0.1460(5) 0.0776(19) Uani 1 1 d . U . . .
H1 H 0.081165 0.381344 0.185648 0.093 Uiso 1 1 d R U . . .
C7 C 0.2176(8) 0.3394(16) 0.2211(8) 0.113(4) Uani 1 1 d . . . . .
H7A H 0.270680 0.309281 0.218245 0.170 Uiso 1 1 calc R U . . .
H7B H 0.201302 0.270877 0.262630 0.170 Uiso 1 1 calc R U . . .
H7C H 0.213801 0.467615 0.231324 0.170 Uiso 1 1 calc R U . . .
C8 C 0.1716(7) 0.2979(11) 0.1523(7) 0.087(2) Uani 1 1 d . U . . .
C9 C 0.1993(7) 0.2187(11) 0.0915(6) 0.087(2) Uani 1 1 d . U . . .
H9 H 0.251665 0.188527 0.094816 0.104 Uiso 1 1 calc R U . . .
C10 C 0.1483(7) 0.1880(13) 0.0285(7) 0.096(3) Uani 1 1 d . U . . .
H10 H 0.165741 0.133071 -0.013786 0.115 Uiso 1 1 calc R U . . .
C11 C 0.0704(8) 0.2306(14) 0.0197(8) 0.108(3) Uani 1 1 d . U . . .
H11 H 0.036810 0.205610 -0.027182 0.130 Uiso 1 1 calc R U . . .
C12 C 0.0460(8) 0.3027(12) 0.0752(7) 0.100(3) Uani 1 1 d . U . . .
H12 H -0.006307 0.334926 0.070546 0.120 Uiso 1 1 calc R U . . .
Br7 Br 0.29754(8) 0.82437(17) 0.04332(9) 0.0562(4) Uani 0.5 1 d . . P . .
Br8 Br 0.20686(10) 0.7472(2) 0.04250(10) 0.0706(5) Uani 0.5 1 d . . P . .

loop_
_atom_site_aniso_label
_atom_site_aniso_U_11
_atom_site_aniso_U_22
_atom_site_aniso_U_33
_atom_site_aniso_U_23
_atom_site_aniso_U_13
_atom_site_aniso_U_12
Br1 0.0685(5) 0.0467(4) 0.0764(5) 0.0131(3) 0.0531(4) 0.0080(3)
Br2 0.0708(5) 0.0560(4) 0.0633(5) -0.0019(3) 0.0305(4) -0.0008(3)
Br5A 0.0522(13) 0.0412(8) 0.0668(16) 0.0181(11) 0.0154(10) 0.0082(9)
Br5B 0.0550(14) 0.0513(11) 0.0650(15) 0.0249(12) 0.0211(10) 0.0295(11)
Se1 0.0584(6) 0.0290(4) 0.0752(7) 0.000 0.0416(5) 0.000
N1 0.102(5) 0.048(3) 0.105(5) -0.014(3) 0.079(4) -0.002(3)
C7 0.149(11) 0.081(7) 0.120(10) -0.019(7) 0.051(9) -0.008(7)
C8 0.122(6) 0.047(4) 0.109(6) 0.005(4) 0.068(5) 0.000(4)
C9 0.137(6) 0.050(4) 0.093(5) 0.012(4) 0.077(5) 0.020(4)
C10 0.134(7) 0.070(5) 0.105(6) 0.031(5) 0.077(5) 0.034(5)
C11 0.148(7) 0.073(5) 0.119(6) 0.025(5) 0.069(6) 0.018(5)
C12 0.134(6) 0.063(5) 0.122(6) 0.012(5) 0.076(5) 0.006(5)
Br7 0.0542(8) 0.0382(7) 0.0674(9) -0.0105(6) -0.0134(7) 0.0104(5)
Br8 0.0836(11) 0.0608(9) 0.0795(11) 0.0220(8) 0.0480(9) 0.0216(8)

_geom_special_details            
;
 All esds (except the esd in the dihedral angle between two l.s. planes)
 are estimated using the full covariance matrix.  The cell esds are taken
 into account individually in the estimation of esds in distances, angles
 and torsion angles; correlations between esds in cell parameters are only
 used when they are defined by crystal symmetry.  An approximate (isotropic)
 treatment of cell esds is used for estimating esds involving l.s. planes.
;

loop_
_geom_bond_atom_site_label_1
_geom_bond_atom_site_label_2
_geom_bond_distance
_geom_bond_site_symmetry_2
_geom_bond_publ_flag
Br1 Se1 2.5684(6) . ?
Br2 Se1 2.6858(10) . ?
Br5A Br5B 0.621(3) . ?
Br5A Se1 2.660(2) . ?
Br5B Se1 2.306(2) . ?
N1 C8 1.318(13) . ?
N1 C12 1.443(15) . ?
N1 H1 0.8805 . ?
C7 C8 1.375(16) . ?
C7 H7A 0.9800 . ?
C7 H7B 0.9800 . ?
C7 H7C 0.9800 . ?
C8 C9 1.391(12) . ?
C9 C10 1.326(16) . ?
C9 H9 0.9500 . ?
C10 C11 1.404(16) . ?
C10 H10 0.9500 . ?
C11 C12 1.262(14) . ?
C11 H11 0.9500 . ?
C12 H12 0.9500 . ?
Br7 Br8 1.596(2) 7_565 ?
Br7 Br8 1.711(2) . ?
Br7 Br7 2.351(3) 7_565 ?
Br8 Br8 2.328(3) 7_565 ?

loop_
_geom_angle_atom_site_label_1
_geom_angle_atom_site_label_2
_geom_angle_atom_site_label_3
_geom_angle
_geom_angle_site_symmetry_1
_geom_angle_site_symmetry_3
_geom_angle_publ_flag
Br5B Br5A Se1 49.5(5) . . ?
Br5A Br5B Se1 118.6(5) . . ?
Br5B Se1 Br5B 79.57(14) 2 . ?
Br5B Se1 Br1 92.34(7) 2 2 ?
Br5B Se1 Br1 88.81(7) . 2 ?
Br5B Se1 Br1 88.81(7) 2 . ?
Br5B Se1 Br1 92.34(7) . . ?
Br1 Se1 Br1 178.51(5) 2 . ?
Br5B Se1 Br5A 11.82(10) 2 2 ?
Br5B Se1 Br5A 91.11(8) . 2 ?
Br1 Se1 Br5A 90.02(6) 2 2 ?
Br1 Se1 Br5A 90.91(6) . 2 ?
Br5B Se1 Br5A 91.11(8) 2 . ?
Br5B Se1 Br5A 11.82(10) . . ?
Br1 Se1 Br5A 90.91(6) 2 . ?
Br1 Se1 Br5A 90.02(6) . . ?
Br5A Se1 Br5A 102.74(12) 2 . ?
Br5B Se1 Br2 96.83(7) 2 . ?
Br5B Se1 Br2 176.08(7) . . ?
Br1 Se1 Br2 89.81(3) 2 . ?
Br1 Se1 Br2 89.11(3) . . ?
Br5A Se1 Br2 85.23(6) 2 . ?
Br5A Se1 Br2 172.00(6) . . ?
Br5B Se1 Br2 176.08(7) 2 2 ?
Br5B Se1 Br2 96.83(7) . 2 ?
Br1 Se1 Br2 89.11(3) 2 2 ?
Br1 Se1 Br2 89.81(3) . 2 ?
Br5A Se1 Br2 172.00(6) 2 2 ?
Br5A Se1 Br2 85.23(6) . 2 ?
Br2 Se1 Br2 86.81(4) . 2 ?
C8 N1 C12 121.0(8) . . ?
C8 N1 H1 119.6 . . ?
C12 N1 H1 119.4 . . ?
C8 C7 H7A 109.5 . . ?
C8 C7 H7B 109.5 . . ?
H7A C7 H7B 109.5 . . ?
C8 C7 H7C 109.5 . . ?
H7A C7 H7C 109.5 . . ?
H7B C7 H7C 109.5 . . ?
N1 C8 C7 116.9(10) . . ?
N1 C8 C9 120.4(12) . . ?
C7 C8 C9 122.7(12) . . ?
C10 C9 C8 115.9(11) . . ?
C10 C9 H9 122.0 . . ?
C8 C9 H9 122.0 . . ?
C9 C10 C11 124.8(11) . . ?
C9 C10 H10 117.6 . . ?
C11 C10 H10 117.6 . . ?
C12 C11 C10 118.7(14) . . ?
C12 C11 H11 120.7 . . ?
C10 C11 H11 120.7 . . ?
C11 C12 N1 119.1(12) . . ?
C11 C12 H12 120.4 . . ?
N1 C12 H12 120.4 . . ?
Br8 Br7 Br8 89.44(9) 7_565 . ?
Br8 Br7 Br7 46.71(8) 7_565 7_565 ?
Br8 Br7 Br7 42.74(8) . 7_565 ?
Br7 Br8 Br7 90.56(9) 7_565 . ?
Br7 Br8 Br8 47.30(8) 7_565 7_565 ?
Br7 Br8 Br8 43.25(8) . 7_565 ?

_refine_diff_density_max         1.202
_refine_diff_density_min         -1.398
_refine_diff_density_rms         0.132

_shelx_res_file                  
;
TITL 1_a.res in P-1                   New: C2/c
    1_a_pl.res
    created by SHELXL-2017/1 at 14:48:25 on 24-May-2022
CELL  0.71073   17.7961    7.4754   17.6525    90.000   100.133    90.000
ZERR        4    0.0015    0.0006    0.0017     0.000     0.005     0.000
LATT   7
SYMM             - X ,              Y ,    0.50000 - Z
SFAC  C  H Br  N Se
UNIT 48 64 32 8 4

LIST 4 ! automatically inserted. Change 6 to 4 for CHECKCIF!!
TEMP  -123
L.S. 10
FMAP 2
PLAN -20
ACTA 51
BOND $H
SIMU 0.01 0.02 n1 c8 c9 c10 c11 c12
OMIT 0
OMIT -4 0 6
OMIT -4 0 4
SIZE 0.1 0.08 0.08
WGHT    0.048800   18.293100
FVAR       0.15770
BR1   3    0.091877    0.809426    0.152929    11.00000    0.06850    0.04666 =
         0.07638    0.01314    0.05309    0.00800
BR2   3    0.082678    0.552870    0.329466    11.00000    0.07078    0.05598 =
         0.06326   -0.00191    0.03047   -0.00079
BR5A  3   -0.091692    1.036054    0.159039    10.50000    0.05220    0.04122 =
         0.06678    0.01809    0.01542    0.00823
BR5B  3   -0.068117    1.050963    0.188720    10.50000    0.05502    0.05132 =
         0.06503    0.02493    0.02110    0.02954
SE1   5    0.000000    0.813891    0.250000    10.50000    0.05837    0.02897 =
         0.07525    0.00000    0.04158    0.00000
N1    4    0.098415    0.335704    0.146028    11.00000    0.10172    0.04828 =
         0.10484   -0.01441    0.07866   -0.00186
AFIX   3
H1    2    0.081165    0.381344    0.185648    11.00000   -1.20000
AFIX   0
C7    1    0.217649    0.339405    0.221069    11.00000    0.14880    0.08128 =
         0.12013   -0.01934    0.05104   -0.00832
AFIX 137
H7A   2    0.270680    0.309281    0.218245    11.00000   -1.50000
H7B   2    0.201302    0.270877    0.262630    11.00000   -1.50000
H7C   2    0.213801    0.467615    0.231324    11.00000   -1.50000
AFIX   0
C8    1    0.171567    0.297920    0.152313    11.00000    0.12245    0.04707 =
         0.10948    0.00453    0.06780   -0.00019
C9    1    0.199329    0.218729    0.091453    11.00000    0.13660    0.05031 =
         0.09323    0.01213    0.07687    0.02027
AFIX  43
H9    2    0.251665    0.188527    0.094816    11.00000   -1.20000
AFIX   0
C10   1    0.148314    0.187967    0.028474    11.00000    0.13411    0.06953 =
         0.10511    0.03147    0.07733    0.03428
AFIX  43
H10   2    0.165741    0.133071   -0.013786    11.00000   -1.20000
AFIX   0
C11   1    0.070424    0.230580    0.019666    11.00000    0.14845    0.07343 =
         0.11885    0.02538    0.06866    0.01809
AFIX  43
H11   2    0.036810    0.205610   -0.027182    11.00000   -1.20000
AFIX   0
C12   1    0.045952    0.302742    0.075247    11.00000    0.13367    0.06285 =
         0.12182    0.01154    0.07561    0.00566
AFIX  43
H12   2   -0.006307    0.334926    0.070546    11.00000   -1.20000
AFIX   0
BR7   3    0.297537    0.824373    0.043322    10.50000    0.05425    0.03815 =
         0.06744   -0.01053   -0.01336    0.01036
BR8   3    0.206859    0.747221    0.042502    10.50000    0.08358    0.06076 =
         0.07952    0.02200    0.04798    0.02165

HKLF 4 1 -1.0000 -2.00  0.00 -1.00  0.00  0.00  0.00  0.0000 -1.0000


REM  1_a.res in P-1                   New: C2/c
REM R1 =  0.0464 for    1919 Fo > 4sig(Fo)  and  0.0657 for all    2561 data
REM    124 parameters refined using     36 restraints

END

WGHT      0.0466     18.8020

REM Highest difference peak  1.202,  deepest hole -1.398,  1-sigma level  0.132
Q1    1   0.0746  0.6523  0.3287  11.00000  0.05    1.20
Q2    1   0.0988  0.2816  0.0848  11.00000  0.05    1.06
Q3    1  -0.0289  0.8605  0.2323  11.00000  0.05    0.93
Q4    1   0.2377  0.2855  0.1754  11.00000  0.05    0.81
Q5    1   0.2684  0.7792  0.0643  11.00000  0.05    0.80
Q6    1   0.0111  0.7533  0.2241  11.00000  0.05    0.68
Q7    1   0.0622  0.8545  0.1319  11.00000  0.05    0.62
Q8    1   0.0946  0.7227  0.1346  11.00000  0.05    0.58
Q9    1   0.1636  0.3274  0.2059  11.00000  0.05    0.57
Q10   1   0.3191  0.8348  0.0564  11.00000  0.05    0.57
Q11   1   0.2949  0.8325  0.0169  11.00000  0.05    0.55
Q12   1   0.0180  0.2707  0.0276  11.00000  0.05    0.49
Q13   1   0.3107  0.7459  0.0441  11.00000  0.05    0.48
Q14   1   0.1086  0.8460  0.1691  11.00000  0.05    0.47
Q15   1   0.1090  0.5583  0.3397  11.00000  0.05    0.45
Q16   1   0.0961  0.8235  0.1792  11.00000  0.05    0.41
Q17   1   0.0801  0.9683  0.1592  11.00000  0.05    0.37
Q18   1   0.0589  0.4805  0.3422  11.00000  0.05    0.37
Q19   1   0.2300  0.3288  0.2431  11.00000  0.05    0.36
Q20   1   0.0583  0.7867  0.3245  11.00000  0.05    0.36
;
_shelx_res_checksum              49735

_shelx_hkl_file                  
;
   0   0  -2 1534.35   66.19
   0   0  -2 1416.26   62.49
   0   0   2 1346.97   65.29
   0   0   2 1400.46   62.49
   0   0  -3   -0.20    0.70
   0   0  -3    0.80    0.70
   0   0   3   -0.40    0.70
   0   0   3   -0.30    0.60
   0   0  -4  449.95   19.20
   0   0  -4  468.55   19.50
   0   0   4  430.66   19.20
   0   0   4  475.95   19.50
   0   0  -5   -2.00    1.00
   0   0  -5    1.10    1.20
   0   0   5    1.10    1.10
   0   0   5    1.30    1.30
   0   0  -6 4489.65  191.38
   0   0  -6 4053.99  199.98
   0   0   6 4532.25  191.08
   0   0   6 4323.87  200.38
   0   0  -7   -0.60    1.30
   0   0  -7    0.90    1.70
   0   0   7   -0.30    1.60
   0   0   7    1.10    1.60
   0   0  -8  630.84   29.00
   0   0   8  693.03   28.50
   0   0  -9    0.40    2.20
   0   0  -9   -1.10    2.00
   0   0   9   -0.10    2.00
   0   0   9    0.00    2.10
   0   0 -10 2735.53  137.19
   0   0 -10 2594.34  151.18
   0   0  10 2891.61  153.38
   0   0  10 2759.82  136.69
   0   0 -11    1.30    2.90
   0   0 -11    0.50    2.60
   0   0  11    3.00    2.70
   0   0  11    3.70    2.80
   0   0 -12  492.75   23.60
   0   0 -12  522.65   24.70
   0   0  12  549.45   24.50
   0   0  12  493.75   23.60
   0   0 -13   -1.90    3.00
   0   0 -13    1.00    3.50
   0   0  13    1.10    2.90
   0   0  13   -2.10    2.90
   0   0 -14  299.77   16.10
   0   0 -14  306.47   17.20
   0   0  14  284.87   16.50
   0   0  14  306.67   15.90
   0   0 -15    0.00    3.60
   0   0 -15    1.20    4.00
   0   0  15    3.00    3.70
   0   0  15   -0.10    3.70
   0   0 -16   80.29    9.10
   0   0  16   68.39    7.30
   0   0 -17    8.20    5.20
   0   0  17    4.50    4.20
   0   0 -18   11.10    6.10
   0   0  18   11.90    5.00
   0   0 -19   -1.90    5.50
   0   0  19    1.10    4.40
   0   0 -20    4.90    6.10
   0   0  20   17.80    5.80
   0   0 -21    3.50    6.70
   0   0  21    7.80    5.60
   0   0 -22    7.80    7.30
   0   0  22    3.60    5.20
   1   0 -22    4.80    6.90
  -1   0  21    4.60    4.80
   1   0 -21    0.00    6.50
  -1   0  20   40.30    6.60
   1   0 -20   26.00    8.00
  -1   0  19   20.20    5.80
   1   0 -19   33.90    8.00
  -1   0  18   27.40    5.60
   1   0 -18   33.40    7.80
  -1   0  17    5.50    4.30
   1   0 -17    0.60    5.00
  -1   0  16   22.10    4.90
   1   0 -16   10.20    6.80
   1   0 -16   18.90    4.60
  -1   0  15   15.70    4.10
  -1   0  15   13.90    5.00
   1   0 -15    6.60    3.90
   1   0 -15   16.00    5.40
  -1   0  14   56.39    6.00
  -1   0  14   71.59    8.20
   1   0 -14   49.80    5.90
   1   0 -14   52.89    7.40
  -1   0  13  193.08   11.90
  -1   0  13  171.88   10.30
   1   0 -13  163.58   11.70
   1   0 -13  180.08   10.70
  -1   0  12    5.10    3.30
  -1   0  12    3.00    2.80
   1   0 -12    4.20    3.40
   1   0 -12    6.30    2.80
  -1   0  11   22.20    4.50
  -1   0  11    7.60    2.80
   1   0 -11   10.00    3.10
   1   0 -11   12.10    3.50
  -1   0  10   54.79    4.90
  -1   0  10   38.70    5.10
   1   0 -10   44.30    5.40
   1   0 -10   45.80    4.60
  -1   0   9 1865.71   75.19
   1   0  -9 1728.53   74.99
   1   0  -9 1817.42   74.19
  -1   0   8  409.46   18.20
  -1   0   8  403.36   19.20
   1   0  -8  424.66   18.40
   1   0  -8  405.56   19.20
  -1   0   7   56.59    4.80
  -1   0   7   55.49    3.90
   1   0  -7   53.19    4.00
   1   0  -7   54.59    4.60
  -1   0   6    4.70    1.80
  -1   0   6    4.00    1.40
   1   0  -6    6.20    1.50
   1   0  -6    5.30    1.90
  -1   0   5  559.24   24.30
  -1   0   5  567.84   23.50
   1   0  -5  572.24   23.60
   1   0  -5  550.04   24.30
  -1   0   4  130.29    6.10
  -1   0   4  127.09    6.80
   1   0  -4  134.59    6.20
   1   0  -4  127.59    6.70
  -1   0   3 1240.48   64.09
  -1   0   3 1111.59   54.19
   1   0  -3 1143.59   54.69
   1   0  -3 1298.47   64.69
  -1   0   2   15.90    1.20
  -1   0   2   15.60    1.70
   1   0  -2   13.10    1.50
   1   0  -2   17.80    1.30
  -1   0   1   68.29    3.30
  -1   0   1   65.89    3.10
   1   0  -1   65.49    3.10
   1   0  -1   66.09    3.20
  -1   0   0  163.78    6.90
  -1   0   0  158.38    6.80
   1   0   0  166.08    6.90
   1   0   0  155.08    6.70
  -1   0  -1 2658.73  120.39
  -1   0  -1 2896.21  117.59
  -1   0  -1 2936.11  119.89
   1   0   1 2824.22  117.29
  -1   0  -2  409.06   24.20
  -1   0  -2  378.76   21.90
   1   0   2  407.36   22.50
   1   0   2  398.76   23.90
  -1   0  -3   49.30    2.80
  -1   0  -3   46.90    3.00
   1   0   3   50.39    3.20
   1   0   3   47.50    2.80
  -1   0  -4    4.30    1.30
  -1   0  -4    4.60    1.30
   1   0   4    4.10    1.40
   1   0   4    5.40    1.30
  -1   0  -5  119.49    6.00
  -1   0  -5  111.19    6.10
   1   0   5  120.29    6.30
   1   0   5  106.89    5.90
  -1   0  -6   29.50    3.10
  -1   0  -6   32.40    3.30
   1   0   6   21.00    2.90
   1   0   6   27.50    3.00
  -1   0  -7    6.30    2.20
  -1   0  -7    6.30    1.90
   1   0   7    4.10    1.80
   1   0   7    6.90    2.00
  -1   0  -8   14.70    2.90
  -1   0  -8   13.80    2.70
   1   0   8   12.60    2.70
  -1   0  -9    1.20    2.20
   1   0   9    2.70    2.00
   1   0   9    2.70    2.30
  -1   0 -10   -1.00    2.20
  -1   0 -10   -0.30    2.20
   1   0  10    2.00    2.50
   1   0  10    4.10    2.60
  -1   0 -11 1489.95   61.39
  -1   0 -11 1410.66   61.69
   1   0  11 1484.05   61.69
   1   0  11 1459.65   61.39
  -1   0 -12    1.80    3.00
  -1   0 -12    5.50    3.50
   1   0  12   -3.00    3.00
   1   0  12    1.70    2.70
  -1   0 -13    2.00    3.60
  -1   0 -13    3.10    3.50
   1   0  13   -2.00    2.70
   1   0  13    0.80    3.20
  -1   0 -14    3.20    4.00
  -1   0 -14    6.90    3.50
   1   0  14    4.70    3.60
  -1   0 -15   11.10    4.80
  -1   0 -15    4.00    4.60
   1   0  15   13.80    4.40
   1   0  15   11.90    4.50
  -1   0 -16   24.00    6.30
   1   0  16   34.80    6.20
  -1   0 -17   10.70    5.80
   1   0  17   10.30    4.80
  -1   0 -18   14.30    6.20
   1   0  18   19.80    5.40
  -1   0 -19   10.00    6.00
   1   0  19    9.80    5.30
  -1   0 -20    9.90    6.70
   1   0  20    7.50    5.60
  -1   0 -21    6.30    6.90
  -2   0  22    8.80    5.50
   2   0 -22    5.90    7.10
  -2   0  21    5.00    5.20
  -2   0  20    7.60    5.20
   2   0 -20   14.50    7.00
  -2   0  19   20.20    5.40
   2   0 -19   22.60    7.30
  -2   0  18   55.19    7.00
   2   0 -18   87.19   10.60
  -2   0  17    8.60    5.50
   2   0 -17   12.10    5.80
  -2   0  16    2.50    3.60
   2   0 -16    3.20    4.70
   2   0 -16   -2.00    3.40
  -2   0  15   76.99    7.00
   2   0 -15   80.19    9.00
   2   0 -15   93.19    8.30
  -2   0  14  542.35   25.90
  -2   0  14  618.64   28.30
   2   0 -14  579.04   26.50
   2   0 -14  537.35   27.80
  -2   0  13  108.39    7.60
  -2   0  13  103.19    9.60
   2   0 -13  107.19    8.00
   2   0 -13   84.49    8.60
  -2   0  12    8.50    3.80
  -2   0  12    8.00    2.90
   2   0 -12   11.80    3.30
   2   0 -12   12.60    4.50
  -2   0  11  280.07   15.20
  -2   0  11  259.67   13.30
   2   0 -11  276.67   13.80
   2   0 -11  268.97   14.90
  -2   0  10  382.36   18.10
  -2   0  10  447.56   20.30
   2   0 -10  393.36   18.50
   2   0 -10  390.86   19.70
  -2   0   9 1389.36   56.19
  -2   0   9 1345.97   57.19
   2   0  -9 1358.96   55.89
   2   0  -9 1284.37   56.99
  -2   0   8 5178.08  226.08
  -2   0   8 4789.42  249.78
   2   0  -8 5359.66  251.57
   2   0  -8 5472.85  237.28
  -2   0   7 2500.75  115.79
  -2   0   7 2288.67  136.59
   2   0  -7 2450.55  118.39
   2   0  -7 2825.72  139.69
  -2   0   6  513.25   22.00
  -2   0   6  471.45   20.50
   2   0  -6  481.15   20.70
   2   0  -6  469.75   21.60
  -2   0   5  147.99    7.10
  -2   0   5  143.19    8.10
   2   0  -5  151.38    7.20
   2   0  -5  143.39    8.00
  -2   0   4 1703.53   77.39
   2   0  -4 1613.54   88.29
   2   0  -4 1670.23   78.79
   2   0  -4 1701.93   90.89
  -2   0   3 3647.03  160.98
   2   0  -3 3935.01  171.18
   2   0  -3 3827.12  172.38
   2   0  -3 3784.82  162.78
  -2   0   2 3780.02  160.48
   2   0  -2 3878.41  161.98
   2   0  -2 3784.22  168.58
   2   0  -2 3675.63  166.28
  -2   0   1  559.14   23.60
  -2   0   1  595.04   23.60
   2   0  -1  553.04   23.60
   2   0  -1  567.54   23.60
  -2   0   0 1005.90   49.00
  -2   0   0  942.41   49.40
   2   0   0  980.80   47.40
   2   0   0  992.80   50.49
  -2   0  -1  224.58   10.20
  -2   0  -1  222.18    9.60
   2   0   1  226.48    9.60
   2   0   1  232.58   10.30
  -2   0  -2 6431.46  278.17
  -2   0  -2 7200.68  285.97
  -2   0  -2 6676.53  283.17
   2   0   2 6738.03  278.27
  -2   0  -3 4851.41  197.78
  -2   0  -3 4687.93  201.78
   2   0   3 4570.94  197.08
   2   0   3 4531.55  201.68
  -2   0  -4 2340.47  110.19
  -2   0  -4 2324.27  106.29
   2   0   4 2291.67  110.29
   2   0   4 2312.17  106.29
  -2   0  -5  343.17   14.80
  -2   0  -5  333.17   15.20
   2   0   5  332.77   15.40
   2   0   5  335.27   14.70
  -2   0  -6  277.37   13.00
  -2   0  -6  281.77   13.40
   2   0   6  286.37   13.00
   2   0   6  294.47   13.60
  -2   0  -7   55.69    4.80
  -2   0  -7   51.29    4.30
   2   0   7   61.09    5.00
   2   0   7   56.99    4.30
  -2   0  -8   63.79    5.60
  -2   0  -8   57.19    4.80
   2   0   8   54.09    5.30
   2   0   8   68.09    4.90
  -2   0  -9  110.29    7.10
  -2   0  -9   97.59    7.00
   2   0   9  107.29    7.50
   2   0   9  101.09    6.80
  -2   0 -10  358.96   17.10
  -2   0 -10  322.47   16.90
   2   0  10  353.96   17.50
   2   0  10  368.26   17.00
  -2   0 -11   10.30    3.20
  -2   0 -11    8.40    3.10
   2   0  11    6.60    2.90
   2   0  11    3.60    3.10
  -2   0 -12  107.99   12.30
  -2   0 -12   91.79    7.60
   2   0  12   63.39    7.30
   2   0  12   79.09    6.90
  -2   0 -13  122.09    9.40
  -2   0 -13  128.89    9.30
   2   0  13  126.49    9.80
   2   0  13  133.29    9.20
  -2   0 -14   12.20    4.30
  -2   0 -14    5.10    2.70
   2   0  14    4.70    4.10
   2   0  14   10.90    4.00
  -2   0 -15    2.60    4.00
   2   0  15    4.30    4.00
   2   0  15   -3.00    3.30
  -2   0 -16   22.40    5.70
   2   0  16   20.10    5.30
   2   0  16   15.40    5.30
  -2   0 -17   20.60    6.10
   2   0  17   16.60    5.30
  -2   0 -18    0.50    4.90
   2   0  18   11.30    5.40
  -2   0 -19   -2.80    5.40
   2   0  19   -0.20    5.40
  -2   0 -20   -1.70    5.80
   2   0  20    3.10    5.40
  -2   0 -21    3.10    6.20
   2   0  21   -0.40    5.10
  -3   0  21   12.70    5.30
   3   0 -21   14.00    7.40
  -3   0  20   13.70    5.40
   3   0 -20   13.60    7.20
  -3   0  19    0.00    4.10
   3   0 -19    4.70    6.40
  -3   0  18   29.60    5.70
   3   0 -18   38.30    8.00
  -3   0  17    3.90    4.20
   3   0 -17   11.80    5.80
  -3   0  16   80.69    7.70
   3   0 -16   81.69    9.80
   3   0 -16   83.19    8.30
  -3   0  15   12.30    3.70
   3   0 -15    8.50    4.90
   3   0 -15   17.20    4.50
  -3   0  14   -3.50    4.30
  -3   0  14    1.10    2.90
   3   0 -14    2.90    3.70
   3   0 -14    2.60    4.20
  -3   0  13   91.19    9.30
  -3   0  13   82.69    6.90
   3   0 -13   84.69    8.70
   3   0 -13   88.09    7.60
  -3   0  12   74.59    6.10
  -3   0  12   71.59    9.40
   3   0 -12   73.79    8.20
   3   0 -12   80.29    6.80
  -3   0  11   65.59    7.20
  -3   0  11   50.19    4.90
   3   0 -11   62.09    7.20
   3   0 -11   62.69    6.00
  -3   0  10  227.68   11.40
   3   0 -10  228.38   11.80
   3   0 -10  224.98   13.20
  -3   0   9    9.80    2.40
   3   0  -9   10.80    3.30
   3   0  -9   11.30    2.70
  -3   0   8  507.15   22.00
   3   0  -8  517.75   23.70
   3   0  -8  482.85   23.30
   3   0  -8  515.85   22.30
  -3   0   7  750.52   31.50
   3   0  -7  762.02   32.90
   3   0  -7  763.12   33.20
   3   0  -7  728.43   31.90
  -3   0   6  581.64   24.30
   3   0  -6  573.14   25.50
   3   0  -6  568.54   26.30
   3   0  -6  557.94   24.50
  -3   0   5    5.90    1.60
   3   0  -5    7.30    2.20
   3   0  -5    8.20    2.20
   3   0  -5    8.90    2.00
  -3   0   4   73.19    4.40
   3   0  -4   71.99    5.20
   3   0  -4   80.09    4.80
   3   0  -4   72.99    5.10
  -3   0   3  298.17   13.10
   3   0  -3  293.57   13.50
   3   0  -3  301.37   13.70
   3   0  -3  291.67   13.30
  -3   0   2   65.89    4.20
   3   0  -2   85.09    4.80
   3   0  -2   76.79    4.60
   3   0  -2   68.59    4.50
  -3   0   1   89.29    5.10
  -3   0   1   91.09    5.10
   3   0  -1   97.19    4.90
   3   0  -1   88.09    5.20
  -3   0   0  477.05   21.20
  -3   0   0  518.95   21.40
   3   0   0  494.45   21.50
   3   0   0  497.55   20.70
  -3   0  -1   20.90    2.00
  -3   0  -1   19.10    2.70
   3   0   1   20.60    1.80
   3   0   1   24.80    2.90
  -3   0  -2  457.35   20.10
  -3   0  -2  485.55   20.90
  -3   0  -2  519.85   21.20
   3   0   2  472.55   20.00
  -3   0  -3 1065.59   43.80
  -3   0  -3  998.70   43.30
  -3   0  -3 1029.60   42.50
   3   0   3 1072.89   42.50
  -3   0  -4 1824.52   75.19
  -3   0  -5   23.30    3.30
  -3   0  -5   17.90    2.30
   3   0   5   20.80    2.20
  -3   0  -6   17.20    2.30
  -3   0  -6    9.40    2.50
   3   0   6   17.00    3.10
   3   0   6    9.60    2.00
  -3   0  -7   71.69    4.90
  -3   0  -7   63.69    5.60
   3   0   7   66.09    4.70
   3   0   7   74.99    6.00
  -3   0  -8   22.70    3.90
  -3   0  -8   21.50    3.00
   3   0   8   18.90    2.90
   3   0   8   15.90    3.50
  -3   0  -9   44.80    5.00
  -3   0  -9   52.99    4.90
   3   0   9   49.90    5.50
   3   0   9   54.89    4.90
  -3   0 -10  100.39    7.40
  -3   0 -10  112.39    7.90
   3   0  10  112.99    8.50
   3   0  10  103.39    7.10
  -3   0 -11    3.20    3.10
  -3   0 -11    3.60    3.00
   3   0  11    4.30    3.50
   3   0  11    3.50    2.70
  -3   0 -12   15.90    4.20
  -3   0 -12   12.80    3.80
   3   0  12   15.80    3.60
   3   0  12    6.30    4.00
  -3   0 -13   97.09    8.50
   3   0  13   84.99    8.50
   3   0  13  106.59    8.00
  -3   0 -14  115.99    9.50
   3   0  14  112.59   10.10
   3   0  14  116.99    8.90
  -3   0 -15   18.90    5.00
   3   0  15   21.00    4.70
   3   0  15   12.40    5.40
  -3   0 -16   21.90    5.60
   3   0  16   21.00    6.00
   3   0  16   24.50    6.00
  -3   0 -17   -0.40    4.60
   3   0  17   12.80    6.10
  -3   0 -18   -7.40    4.50
   3   0  18   -5.70    4.90
  -3   0 -19   -7.40    4.80
   3   0  19    1.70    5.60
  -3   0 -20    2.60    5.80
   3   0  20    9.50    6.50
  -4   0  20   -1.30    4.30
   4   0 -20    0.10    6.70
  -4   0  19   15.00    5.20
   4   0 -19   21.10    7.60
  -4   0  18    6.40    4.60
   4   0 -18   12.60    6.30
  -4   0  17  311.67   16.60
   4   0 -17  294.57   19.50
  -4   0  16   57.89    6.40
   4   0 -16   55.19    8.60
  -4   0  15  142.49    9.70
   4   0 -15  141.29   12.30
   4   0 -15  153.38   10.50
  -4   0  14    8.70    3.40
   4   0 -14   12.10    4.10
  -4   0  13   34.00    4.60
   4   0 -13   35.30    6.20
   4   0 -13   36.90    5.30
   4   0 -13   31.50    5.80
  -4   0  12   28.80    4.10
   4   0 -12   30.30    4.70
   4   0 -12   20.60    5.10
   4   0 -12   37.20    5.90
  -4   0  11 1015.00   41.30
   4   0 -11  923.71   43.10
   4   0 -11  999.80   41.90
   4   0 -11  927.11   43.20
  -4   0  10   27.40    3.70
   4   0 -10   28.00    5.00
   4   0 -10   26.30    4.00
   4   0 -10   27.50    4.80
  -4   0   9    2.50    2.20
   4   0  -9    5.50    3.00
   4   0  -9    3.90    2.50
   4   0  -9    4.20    3.30
  -4   0   8  235.58   11.40
   4   0  -8  228.98   11.90
   4   0  -8  228.68   13.00
   4   0  -8  235.08   12.80
  -4   0   7  755.42   32.40
   4   0  -7  793.12   33.90
   4   0  -7  776.42   34.00
   4   0  -7  747.73   32.90
  -4   0   6  209.78   10.50
   4   0  -6  237.18   11.80
   4   0  -6  217.18   11.90
   4   0  -6  205.48   10.90
  -4   0   5 4495.05  196.28
   4   0  -5 4217.78  213.48
   4   0  -5 4469.95  201.58
   4   0  -5 4598.34  213.88
  -4   0   4   25.70    3.00
   4   0  -4   35.90    3.90
   4   0  -4   30.80    3.70
  -4   0   3 1405.86   58.19
   4   0  -3 1419.76   58.69
   4   0  -3 1414.26   58.49
   4   0  -3 1427.36   58.69
  -4   0   2   65.49    4.70
   4   0  -2   72.49    4.70
   4   0  -2   71.59    5.00
   4   0  -2   70.09    5.10
  -4   0   1  434.36   19.00
  -4   0   1  429.86   19.00
   4   0  -1  424.96   18.50
  -4   0   0   22.00    3.00
  -4   0   0   26.10    2.80
   4   0   0   27.30    2.50
   4   0   0   22.40    3.30
  -4   0  -1   42.70    4.20
  -4   0  -1   42.50    3.30
   4   0   1   34.90    2.80
  -4   0  -2  512.05   22.00
  -4   0  -2  520.55   23.00
  -4   0  -2  540.25   23.40
   4   0   2  514.55   21.80
  -4   0  -3  220.58   10.50
  -4   0  -3  243.48   11.80
  -4   0  -3  244.68   12.10
   4   0   3  231.28   10.40
  -4   0  -4   26.70    2.60
  -4   0  -4   22.50    3.50
  -4   0  -4   31.60    4.40
   4   0   4   26.80    2.50
  -4   0  -5  406.26   19.80
  -4   0  -5  419.56   19.40
  -4   0  -5  408.46   18.00
   4   0   5  423.26   17.90
  -4   0  -6    3.20    2.70
  -4   0  -6    2.90    1.70
  -4   0  -6    0.90    3.10
   4   0   6    2.60    1.70
  -4   0  -7  226.78   12.60
  -4   0  -7  250.17   13.70
  -4   0  -7  238.08   11.60
   4   0   7  246.48   11.60
  -4   0  -8  143.69    8.00
  -4   0  -8  138.49   10.00
  -4   0  -8  130.49    9.10
   4   0   8  151.88    8.10
  -4   0  -9   49.40    5.40
  -4   0  -9   44.20    7.00
   4   0   9   47.70    4.60
  -4   0 -10    5.60    3.40
  -4   0 -10    5.00    2.80
   4   0  10    6.20    3.50
   4   0  10    7.00    2.60
  -4   0 -11  105.89    8.00
  -4   0 -11  133.59    9.20
   4   0  11  114.49    7.90
   4   0  11  109.09    9.40
  -4   0 -12    5.90    3.20
   4   0  12    3.50    4.40
   4   0  12    6.70    3.20
  -4   0 -13    8.60    3.70
   4   0  13    0.90    4.20
   4   0  13    4.10    3.10
  -4   0 -14    3.60    3.70
   4   0  14   -1.70    4.30
   4   0  14   -2.50    2.80
  -4   0 -15   17.10    4.90
   4   0  15   22.00    4.50
   4   0  15   25.00    6.10
  -4   0 -16   14.70    5.10
   4   0  16   12.90    5.60
   4   0  16    8.90    6.00
  -4   0 -17   -5.10    4.10
   4   0  17   -0.90    4.90
  -4   0 -18   -2.80    4.70
  -4   0 -19   -2.30    4.70
   4   0  19    0.60    5.60
  -5   0  19   11.80    5.00
   5   0 -19    0.10    6.60
  -5   0  18   15.60    4.70
   5   0 -18   18.20    7.60
  -5   0  17   22.90    4.90
   5   0 -17   24.40    7.10
  -5   0  16  131.19    9.60
   5   0 -16  114.39   12.10
  -5   0  15    8.50    3.90
   5   0 -15    3.20    5.30
  -5   0  14   52.89    5.80
   5   0 -14   45.80    7.40
   5   0 -14   46.80    6.10
  -5   0  13    3.00    3.20
   5   0 -13    4.50    3.50
  -5   0  12    2.70    3.00
   5   0 -12   -1.40    3.70
   5   0 -12   -0.20    3.10
   5   0 -12   -0.60    3.40
  -5   0  11   25.80    4.00
   5   0 -11   28.50    5.20
   5   0 -11   37.40    5.10
   5   0 -11   31.20    6.00
  -5   0  10  180.18   10.10
   5   0 -10  180.48   12.10
   5   0 -10  195.58   12.10
   5   0 -10  171.18   10.70
  -5   0   9    5.00    2.60
   5   0  -9    0.80    3.50
   5   0  -9    7.50    3.80
   5   0  -9    6.90    3.10
  -5   0   8   91.69    6.50
   5   0  -8  105.79    8.00
   5   0  -8   92.59    8.10
   5   0  -8   87.99    7.10
  -5   0   7  437.16   19.30
   5   0  -7  409.46   20.60
   5   0  -7  419.36   19.90
   5   0  -7  430.66   20.60
  -5   0   6  804.22   33.90
   5   0  -6  826.92   35.00
   5   0  -6  769.32   34.50
   5   0  -6  780.42   35.10
  -5   0   5   28.50    3.60
   5   0  -5   52.29    5.10
   5   0  -5   41.60    4.80
   5   0  -5   35.90    4.60
  -5   0   4  252.87   12.30
   5   0  -4  235.08   12.80
   5   0  -4  249.38   12.90
   5   0  -4  271.47   12.80
  -5   0   3  168.98    8.60
   5   0  -3  145.99    8.90
   5   0  -3  136.89    8.60
   5   0  -3  158.58    8.50
  -5   0   2    3.00    2.30
   5   0  -2    7.20    2.50
   5   0  -2    3.90    2.00
   5   0  -2    2.80    2.50
  -5   0   1    5.30    2.40
   5   0  -1    2.80    1.70
   5   0  -1    1.20    2.40
   5   0  -1   -1.10    1.80
  -5   0   0  375.46   17.20
  -5   0   0  363.46   16.50
   5   0   0  352.16   17.40
   5   0   0  363.56   15.90
  -5   0  -1    4.60    1.90
  -5   0  -1    1.80    2.50
  -5   0  -1    3.60    2.50
   5   0   1    6.10    1.60
  -5   0  -2  110.59    7.50
  -5   0  -2  101.69    6.10
  -5   0  -2  105.69    7.30
   5   0   2  106.49    5.60
  -5   0  -3   81.59    5.30
  -5   0  -3   90.99    7.20
  -5   0  -3   99.69    7.20
   5   0   3   90.49    5.00
  -5   0  -4  315.37   16.10
  -5   0  -4  301.47   14.00
  -5   0  -4  313.07   15.70
   5   0   4  319.77   13.80
  -5   0  -5   83.19    7.50
  -5   0  -5   72.89    4.90
  -5   0  -5   64.69    6.40
   5   0   5   80.19    4.70
  -5   0  -6  392.16   18.10
  -5   0  -6  402.56   19.90
  -5   0  -6  434.76   20.70
   5   0   6  413.96   18.00
  -5   0  -7   63.69    7.30
  -5   0  -7   78.89    5.40
  -5   0  -7  101.39    8.30
   5   0   7   77.29    5.30
  -5   0  -8   26.50    4.80
  -5   0  -8   18.50    3.10
  -5   0  -8   19.30    5.20
   5   0   8   21.10    3.20
  -5   0  -9   20.20    4.60
  -5   0  -9   12.50    5.10
   5   0   9   19.40    3.10
  -5   0 -10   58.59    5.50
   5   0  10   52.89    5.10
  -5   0 -11    5.70    3.10
  -5   0 -11   -2.00    4.30
   5   0  11    6.50    2.90
  -5   0 -12   15.90    5.90
  -5   0 -12   17.50    4.00
   5   0  12   13.40    3.50
  -5   0 -13   15.60    5.80
  -5   0 -13   17.70    4.30
   5   0  13   21.30    4.00
  -5   0 -14    4.40    5.70
  -5   0 -14    0.90    3.50
   5   0  14    0.10    3.00
  -5   0 -15   -2.30    3.60
  -5   0 -15   -0.20    5.80
   5   0  15   -4.80    2.50
  -5   0 -16    5.90    4.20
  -5   0 -16    8.80    6.10
  -5   0 -17    1.20    6.30
  -5   0 -17    1.70    4.00
  -6   0  17    9.00    4.40
   6   0 -17   -1.30    6.30
  -6   0  16  113.69    9.20
   6   0 -16   99.89   11.40
  -6   0  15  120.39    9.40
   6   0 -15  102.39   11.10
  -6   0  14   64.69    6.40
   6   0 -14   34.50    7.20
  -6   0  13  214.18   12.30
   6   0 -13  197.08   14.50
   6   0 -13  216.98   13.20
  -6   0  12   11.30    3.80
   6   0 -12    5.00    5.50
   6   0 -12    6.00    3.70
  -6   0  11   83.19    6.90
   6   0 -11   68.99    8.20
   6   0 -11   79.89    8.60
   6   0 -11   62.09    6.80
  -6   0  10    1.70    2.90
   6   0 -10    0.90    3.60
   6   0 -10    2.50    4.30
   6   0 -10    1.60    3.20
  -6   0   9   58.89    5.60
   6   0  -9   50.39    6.80
   6   0  -9   38.90    5.60
  -6   0   8  134.39    8.60
   6   0  -8  133.49   10.20
   6   0  -8  128.79    9.30
   6   0  -8  150.78   10.20
  -6   0   7  136.79    8.30
   6   0  -7  110.99    8.80
   6   0  -7  115.39    9.30
   6   0  -7  137.19    9.30
  -6   0   6  241.18   12.80
   6   0  -6  230.48   13.60
   6   0  -6  270.27   13.80
   6   0  -6  270.77   14.20
  -6   0   5   26.80    3.90
   6   0  -5   20.20    4.10
   6   0  -5   23.50    4.30
   6   0  -5   21.00    4.10
  -6   0   4    4.80    2.90
   6   0  -4   10.60    3.00
   6   0  -4    7.20    3.20
   6   0  -4    8.10    3.40
  -6   0   3  121.99    7.80
   6   0  -3  113.29    8.30
   6   0  -3  111.19    7.70
   6   0  -3  115.09    7.30
  -6   0   2  119.09    7.80
   6   0  -2  119.19    8.40
   6   0  -2  106.09    7.30
   6   0  -2  112.69    7.00
  -6   0   1  415.26   19.00
   6   0  -1  393.56   17.70
   6   0  -1  372.76   19.40
   6   0  -1  413.96   18.50
  -6   0   0   14.80    3.60
  -6   0   0   22.30    4.10
   6   0   0   12.40    2.40
   6   0   0   14.70    2.90
  -6   0  -1  138.09    9.00
  -6   0  -1  122.49    8.80
   6   0   1  129.49    6.80
  -6   0  -2    6.20    2.30
  -6   0  -2    4.60    3.50
  -6   0  -2   13.30    3.80
   6   0   2   10.80    2.00
  -6   0  -3   90.49    5.90
  -6   0  -3  106.09   12.00
  -6   0  -3  101.99    8.30
   6   0   3   95.79    5.40
  -6   0  -4  349.57   16.90
  -6   0  -4  429.36   19.80
  -6   0  -4  399.46   19.30
   6   0   4  374.56   16.60
  -6   0  -5   13.70    2.60
  -6   0  -5   17.90    4.60
  -6   0  -5   13.80    4.50
   6   0   5   15.20    2.40
  -6   0  -6    4.00    3.60
  -6   0  -6    3.00    2.00
  -6   0  -6    8.30    4.60
   6   0   6    4.60    1.90
  -6   0  -7   28.50    5.70
  -6   0  -7   22.80    3.20
   6   0   7   20.30    2.80
  -6   0  -8   60.19    5.10
  -6   0  -8   65.79    8.10
   6   0   8   55.69    4.70
  -6   0  -9    6.70    5.00
  -6   0  -9    0.80    2.40
   6   0   9    4.70    2.40
  -6   0 -10   20.00    3.60
  -6   0 -10   12.70    5.90
   6   0  10   27.60    3.70
  -6   0 -11    5.80    5.60
  -6   0 -11    3.90    2.90
   6   0  11    4.40    2.60
  -6   0 -12    8.70    3.40
  -6   0 -12    8.80    5.90
   6   0  12    8.70    3.00
  -6   0 -13   24.20    7.40
  -6   0 -13   35.60    5.00
   6   0  13   22.80    4.10
  -6   0 -14   10.20    6.20
  -6   0 -14    6.10    3.90
   6   0  14    7.80    3.30
  -6   0 -15    9.00    4.00
  -6   0 -15    4.50    6.60
   6   0  15    6.50    3.50
  -7   0  14   18.30    4.80
   7   0 -14   21.10    6.90
  -7   0  13   40.20    5.70
   7   0 -13   36.00    7.60
  -7   0  12   28.60    5.20
   7   0 -12   36.10    7.10
  -7   0  11    2.10    3.50
   7   0 -11    4.40    4.80
  -7   0  10    0.00    3.30
   7   0 -10    0.90    3.50
   7   0 -10    3.40    4.50
  -7   0   9   -2.60    3.00
   7   0  -9   -1.50    3.30
   7   0  -9    1.40    4.00
   7   0  -9    3.10    3.60
  -7   0   8   42.50    5.20
   7   0  -8   40.10    5.80
   7   0  -8   36.60    5.90
   7   0  -8   55.89    7.10
  -7   0   7   26.00    4.50
   7   0  -7   15.70    4.40
   7   0  -7   26.40    5.10
   7   0  -7   22.10    4.50
  -7   0   6   -4.30    2.90
   7   0  -6    3.10    3.20
   7   0  -6    2.00    3.60
   7   0  -6    0.90    3.30
  -7   0   5  278.77   14.20
   7   0  -5  275.77   15.20
   7   0  -5  270.07   14.80
   7   0  -5  263.87   14.10
  -7   0   4   42.70    5.30
   7   0  -4   53.79    6.00
   7   0  -4   47.70    6.20
   7   0  -4   54.69    5.30
  -7   0   3  108.19    7.90
   7   0  -3   89.69    6.60
   7   0  -3   99.69    7.50
   7   0  -3  109.59    8.50
  -7   0   2   76.79    7.10
   7   0  -2   83.89    6.50
   7   0  -2   83.89    5.80
  -7   0   1   73.69    7.00
  -7   0   1   80.79    7.50
   7   0  -1   72.19    5.90
   7   0  -1   83.29    5.40
  -7   0   0    3.50    3.60
  -7   0   0    4.70    3.90
   7   0   0   -0.50    1.70
   7   0   0    5.40    2.50
  -7   0  -1    5.60    3.80
  -7   0  -1    4.50    3.80
   7   0   1    8.70    2.50
   7   0   1    4.60    1.90
  -7   0  -2   41.40    6.10
  -7   0  -2   44.70    6.30
   7   0   2   45.20    4.00
   7   0   2   38.80    3.40
  -7   0  -3   38.10    6.10
   7   0   3   34.80    3.50
   7   0   3   35.10    3.00
   7   0   4    0.30    1.50
  -7   0  -5  113.89    6.50
  -7   0  -5  127.89   10.70
   7   0   5  119.89    6.10
  -7   0  -6    2.40    1.90
  -7   0  -6    4.60    4.80
   7   0   6    7.50    1.90
  -7   0  -7   11.00    5.50
  -7   0  -7    3.70    2.10
   7   0   7    4.30    1.90
  -7   0  -8   24.90    6.70
  -7   0  -8   24.80    3.30
   7   0   8   32.40    3.30
  -7   0  -9   24.30    7.00
  -7   0  -9   16.10    2.90
   7   0   9   27.50    3.20
  -7   0 -10   -1.00    2.20
  -7   0 -10    0.90    5.30
  -7   0 -11    1.80    3.30
  -7   0 -11    2.30    5.60
   7   0  11    4.20    2.40
  -7   0 -12    5.60    7.10
  -7   0 -12    7.40    2.70
   7   0  12   -1.30    3.60
  -8   0  10   22.40    4.80
   8   0 -10   22.80    5.90
  -8   0   9   31.90    5.30
   8   0  -9   35.50    6.40
  -8   0   8   52.49    7.30
   8   0  -8   56.59    7.10
   8   0  -8   60.99    6.80
   8   0  -7    8.80    4.20
   8   0  -7    9.90    4.20
  -8   0   6   -1.90    3.80
   8   0  -6    0.40    3.50
   8   0  -6    5.60    3.20
  -8   0   5   -3.00    3.50
   8   0  -5    0.00    3.30
   8   0  -5    3.00    2.90
  -8   0   4   87.89    8.60
   8   0  -4   97.99    7.70
   8   0  -4  103.89    7.10
   8   0  -3  115.19    7.30
   8   0  -3  118.69    8.10
  -8   0   2    0.60    5.00
   8   0  -2   -0.60    2.00
   8   0  -2    0.90    2.60
  -8   0   1   29.60    5.30
   8   0  -1   26.00    3.10
   8   0  -1   24.50    3.50
  -8   0   0   -0.60    3.80
   8   0   0    4.10    2.20
   8   0   0    4.10    1.90
  -8   0  -1    8.30    4.40
   8   0   1    0.00    1.50
   8   0   1   -0.60    1.70
  -8   0  -2   10.00    4.70
   8   0   2    5.80    1.30
   8   0   2    5.10    1.40
  -8   0  -3   31.20    6.30
  -8   0  -4   -6.40    4.20
  -8   0  -5   57.89    8.20
  -8   0  -6  136.69   12.20
  -8   0  -7    2.20    5.70
  -8   0  -8   13.80    6.30
  -9   1  -2    4.60    4.90
  -9   1  -1   -2.90    4.40
  -9   1   0    9.50    4.90
  -9   1   1    0.20    4.10
  -9   1   2   -3.30    4.40
   9  -1  -3   10.00    2.00
  -9   1   3    7.60    4.70
   9  -1  -4   31.80    3.60
  -9   1   4   41.60    6.20
  -8   1  -9   13.90    6.80
  -8   1  -8  100.59   11.20
  -8   1  -7   30.70    7.40
  -8   1  -6   38.30    7.40
  -8   1  -5   28.60    6.60
  -8   1  -4  111.09   10.60
  -8   1  -3    7.80    4.90
  -8   1  -2   83.09    8.60
  -8   1  -1   37.00    6.20
  -8   1   0   72.19    7.80
   8  -1  -1   99.59    5.00
   8  -1  -1  101.29    5.00
  -8   1   1   99.39    8.70
   8  -1  -2   14.30    2.40
   8  -1  -2   12.00    2.20
  -8   1   2   12.70    4.30
   8  -1  -3    1.10    2.00
   8  -1  -3    1.90    2.30
  -8   1   3    1.30    3.80
   8  -1  -4  103.19    6.90
  -8   1   4  114.59    9.10
   8  -1  -5   14.90    3.80
   8  -1  -5    8.60    3.10
  -8   1   5    7.30    4.20
   8  -1  -6  440.36   21.60
   8  -1  -6  482.75   21.60
  -8   1   6  443.36   22.10
   8  -1  -7   45.70    6.10
   8  -1  -7   45.80    5.60
  -8   1   7   44.40    6.20
   8  -1  -8    6.00    4.10
   8  -1  -8   16.00    4.60
  -8   1   8    9.00    4.30
   8  -1  -9   10.20    4.10
   8  -1  -9   -5.60    3.70
  -8   1   9    8.80    4.30
   8  -1 -10   -1.90    4.10
  -8   1  10    0.90    3.90
   8  -1 -11   36.10    6.50
  -8   1  11   28.30    5.40
  -7   1 -13    7.90    6.70
  -7   1 -13   -2.00    2.60
  -7   1 -12   19.90    2.90
  -7   1 -12   18.70    7.00
  -7   1 -11   -2.90    5.70
  -7   1 -11    1.70    1.80
  -7   1 -10    3.70    5.90
  -7   1 -10    1.50    1.50
  -7   1  -9   14.10    6.20
  -7   1  -8   15.70    5.90
  -7   1  -7   87.99    9.30
  -7   1  -6    0.00    4.30
  -7   1  -5    4.60    4.50
  -7   1  -3  254.27   15.10
  -7   1  -2   21.10    4.80
  -7   1  -2   16.50    4.70
  -7   1  -1    2.30    3.60
  -7   1  -1   -2.70    3.50
   7  -1   0    0.70    1.30
   7  -1   0    4.00    1.30
  -7   1   0    1.00    3.30
   7  -1  -1    9.90    1.90
   7  -1  -1   13.40    4.20
   7  -1  -1    2.70    1.80
  -7   1   1    9.30    3.90
   7  -1  -2   -4.60    3.00
   7  -1  -2   -0.10    1.90
   7  -1  -2   -1.30    1.70
  -7   1   2   -4.80    3.00
   7  -1  -3  113.19    7.20
   7  -1  -3  122.99    7.10
   7  -1  -3  117.99    9.30
  -7   1   3  126.19    8.80
   7  -1  -4   11.00    3.20
   7  -1  -4    5.80    3.40
   7  -1  -4    9.40    2.80
  -7   1   4    7.00    3.50
   7  -1  -5   -1.40    2.50
   7  -1  -5    2.70    3.30
   7  -1  -5    5.70    2.90
  -7   1   5    2.30    3.30
   7  -1  -6   25.60    5.00
   7  -1  -6   33.50    4.80
   7  -1  -6   32.30    4.80
  -7   1   6   23.10    4.40
   7  -1  -7  302.57   17.30
   7  -1  -7  309.87   16.70
   7  -1  -7  354.86   17.00
  -7   1   7  323.47   16.50
   7  -1  -8    8.80    3.80
   7  -1  -8    4.90    3.70
   7  -1  -8    9.70    4.10
  -7   1   8    4.50    3.40
   7  -1  -9    1.50    3.60
   7  -1  -9    5.70    3.70
  -7   1   9    5.10    3.70
   7  -1 -10    2.70    4.10
   7  -1 -10    2.50    3.60
  -7   1  10   -0.90    3.70
   7  -1 -11   -1.00    4.30
  -7   1  11    1.30    3.60
   7  -1 -12   -2.40    4.50
  -7   1  12    2.00    3.70
   7  -1 -13   10.50    5.60
  -7   1  13   12.30    4.50
   7  -1 -14    3.70    5.50
  -7   1  14    9.90    4.70
   7  -1 -15    2.00    5.50
  -7   1  15    7.20    4.70
   6  -1  16   17.20    5.20
  -6   1 -16   26.60    7.20
  -6   1 -16   13.20    4.40
   6  -1  15   48.80    5.60
  -6   1 -15   44.60    5.80
   6  -1  14   -2.40    2.60
  -6   1 -14   -3.30    2.90
  -6   1 -14   -1.30    5.40
   6  -1  13   30.00    4.20
  -6   1 -13   24.60    4.20
  -6   1 -13   45.50    7.90
   6  -1  12   -1.20    2.30
  -6   1 -12    8.40    6.00
  -6   1 -12    2.20    2.60
  -6   1 -11    0.70    5.00
  -6   1 -11   -1.80    2.20
   6  -1  10   -0.50    2.00
  -6   1 -10    3.10    2.20
  -6   1 -10   -1.60    4.60
   6  -1   9  187.98    8.90
  -6   1  -9  161.68    8.70
  -6   1  -9  170.58   12.90
   6  -1   8   40.50    3.40
  -6   1  -8   44.10    7.10
  -6   1  -8   39.60    3.50
   6  -1   7   82.29    4.40
  -6   1  -7   73.69    4.50
  -6   1  -7   90.89    8.60
   6  -1   6  349.47   14.70
  -6   1  -6  379.26   18.50
  -6   1  -6  336.57   14.80
  -6   1  -6  361.16   19.10
  -6   1  -5  185.98   11.60
  -6   1  -5  191.78   12.40
  -6   1  -4   82.79    8.10
  -6   1  -4   96.79    8.40
  -6   1  -3  726.73   32.90
   6  -1   2  317.87   14.20
   6  -1   2  329.47   14.10
  -6   1  -2  392.16   17.90
  -6   1  -2  398.26   17.70
   6  -1   1  722.63   30.00
   6  -1   1  719.33   29.80
  -6   1  -1  759.02   32.70
   6  -1   0    1.00    1.50
   6  -1   0    2.10    1.30
   6  -1   0   -1.10    3.00
  -6   1   0    5.70    3.20
   6  -1  -1   61.89    6.30
   6  -1  -1   58.69    4.20
   6  -1  -1   55.09    3.80
  -6   1   1   44.60    5.20
   6  -1  -2  113.19    6.90
   6  -1  -2  122.09    8.70
   6  -1  -2  130.59    6.80
  -6   1   2  117.99    8.20
   6  -1  -3  335.17   15.70
   6  -1  -3  327.27   17.00
   6  -1  -3  342.87   15.60
  -6   1   3  344.97   16.50
   6  -1  -4  128.39    9.00
   6  -1  -4  138.19    8.10
   6  -1  -4  129.49    8.00
  -6   1   4  128.79    8.40
   6  -1  -5   25.40    4.00
   6  -1  -5   34.00    5.10
   6  -1  -5   36.10    4.50
  -6   1   5   28.80    4.20
   6  -1  -6    4.30    2.80
   6  -1  -6    5.00    3.20
   6  -1  -6    2.30    2.90
  -6   1   6    0.60    2.60
   6  -1  -7   23.80    4.70
   6  -1  -7   27.20    4.50
   6  -1  -7   30.60    4.80
  -6   1   7   24.60    4.10
   6  -1  -8  247.08   13.90
   6  -1  -8  236.28   13.90
   6  -1  -8  250.47   14.00
  -6   1   8  252.47   13.10
   6  -1  -9  291.07   16.10
   6  -1  -9  286.37   16.10
   6  -1  -9  285.47   15.70
  -6   1   9  298.97   15.00
   6  -1 -10    1.80    3.60
   6  -1 -10    5.20    3.60
   6  -1 -10    4.70    4.10
  -6   1  10    4.00    3.20
   6  -1 -11   92.89    8.70
   6  -1 -11   88.29    8.60
   6  -1 -11   75.99    8.40
  -6   1  11   97.49    7.70
   6  -1 -12   -3.80    4.10
  -6   1  12    6.70    3.70
   6  -1 -13    8.30    5.30
  -6   1  13    7.10    5.30
   6  -1 -14   32.20    7.20
  -6   1  14   31.80    5.40
   6  -1 -15   -2.80    5.30
  -6   1  15    2.20    4.00
   6  -1 -16    3.90    5.80
  -6   1  16    9.80    4.70
   6  -1 -17   -4.60    5.50
  -6   1  17    0.90    4.20
  -5   1 -18    4.90    4.50
  -5   1 -18    3.60    6.00
   5  -1  17    2.90    3.50
  -5   1 -17    3.70    4.10
   5  -1  16   -0.80    3.10
  -5   1 -16   -4.00    5.00
  -5   1 -16   -0.20    3.70
   5  -1  15   72.99    6.90
  -5   1 -15   43.60    6.10
  -5   1 -15   40.20    8.10
   5  -1  14   69.99    6.60
  -5   1 -14   45.10    7.60
  -5   1 -14   48.70    5.90
   5  -1  13    6.90    3.10
  -5   1 -13    9.90    3.50
  -5   1 -13    7.00    5.70
   5  -1  12    6.80    2.80
  -5   1 -12    4.60    2.90
  -5   1 -12   11.00    5.60
   5  -1  11    2.60    2.40
  -5   1 -11   -0.20    4.40
  -5   1 -11    6.20    2.80
   5  -1  10   79.19    8.30
  -5   1 -10   62.99    8.20
  -5   1 -10   81.69    5.80
   5  -1   9    0.20    1.90
  -5   1  -9    0.10    3.30
  -5   1  -9    1.30    2.00
  -5   1  -9    0.50    3.80
   5  -1   8   -1.30    1.60
  -5   1  -8    5.00    3.20
  -5   1  -8    0.90    3.90
  -5   1  -8   -0.60    1.70
   5  -1   7   78.39    4.70
  -5   1  -7   76.79    4.70
  -5   1  -7   71.29    7.70
  -5   1  -7   74.59    7.50
   5  -1   6    1.60    1.30
  -5   1  -6    0.40    1.30
  -5   1  -6    1.00    2.90
  -5   1  -6   -2.60    3.10
   5  -1   5  221.88    9.70
  -5   1  -5  221.18    9.80
  -5   1  -5  205.58   12.60
  -5   1  -5  239.78   12.40
   5  -1   4  533.25   21.70
  -5   1  -4  532.05   24.30
  -5   1  -4  516.45   21.90
  -5   1  -4  546.55   24.80
   5  -1   3    0.50    0.80
  -5   1  -3    2.30    2.90
  -5   1  -3    4.80    2.60
   5  -1   2   73.69    3.50
   5  -1   2   73.69    3.70
  -5   1  -2   77.99    6.70
   5  -1   1   97.79    7.30
   5  -1   1  109.69    5.00
   5  -1   1  101.39    5.10
  -5   1  -1  117.69    7.50
   5  -1   0  102.79    5.00
   5  -1   0   94.99    7.00
   5  -1   0   98.19    5.20
  -5   1   0   95.69    6.80
   5  -1  -1   21.20    2.50
   5  -1  -1   20.50    3.60
   5  -1  -1   22.60    2.30
  -5   1   1   22.50    3.60
   5  -1  -2    1.60    1.60
   5  -1  -2    3.10    2.40
   5  -1  -2    1.70    1.60
  -5   1   2   -1.30    2.00
   5  -1  -3   12.50    3.00
   5  -1  -3   12.20    2.50
   5  -1  -3   18.30    2.80
  -5   1   3   13.30    2.80
   5  -1  -4    1.90    2.10
   5  -1  -4    4.10    2.50
   5  -1  -4    1.70    2.10
  -5   1   4   -0.40    2.00
   5  -1  -5  141.39    8.70
   5  -1  -5  157.58    8.90
   5  -1  -5  159.68    9.20
  -5   1   5  140.59    8.40
   5  -1  -6  245.48   13.10
   5  -1  -6  239.48   13.00
   5  -1  -6  255.97   13.00
  -5   1   6  253.17   12.50
   5  -1  -7    4.30    2.80
   5  -1  -7    4.00    2.90
   5  -1  -7    4.60    2.90
  -5   1   7    5.90    2.50
   5  -1  -8  163.98   10.30
   5  -1  -8  188.78   10.90
   5  -1  -8  178.08   10.90
  -5   1   8  177.08    9.90
   5  -1  -9  246.78   13.30
   5  -1  -9  242.18   13.90
   5  -1  -9  253.07   13.90
  -5   1   9  239.08   12.70
   5  -1 -10   36.40    5.40
   5  -1 -10   36.50    5.70
   5  -1 -10   31.30    4.90
  -5   1  10   30.50    4.20
   5  -1 -11   -2.80    2.90
   5  -1 -11   -1.50    3.60
  -5   1  11   -2.40    2.80
   5  -1 -12    3.90    4.20
   5  -1 -12   11.20    4.20
   5  -1 -12    6.90    3.80
  -5   1  12    9.10    3.80
   5  -1 -13   15.40    4.50
   5  -1 -13    5.50    4.60
  -5   1  13    8.90    3.70
   5  -1 -14    2.70    5.00
  -5   1  14   -2.50    3.30
   5  -1 -15   -0.80    5.00
  -5   1  15    5.20    4.10
   5  -1 -16   41.70    7.70
  -5   1  16   43.60    6.10
   5  -1 -17   15.70    6.70
  -5   1  17    8.10    4.60
   5  -1 -18   24.70    7.70
  -5   1  18    5.50    4.60
   5  -1 -19   16.30    7.40
  -5   1  19   21.60    5.50
   4  -1  19   -3.10    5.00
  -4   1 -19    4.00    5.40
   4  -1  18    2.00    5.30
  -4   1 -18   -3.90    4.30
   4  -1  17    6.90    5.60
  -4   1 -17    6.10    4.80
   4  -1  16    1.90    4.80
   4  -1  16    4.60    3.50
  -4   1 -16    2.40    4.30
   4  -1  15   25.20    6.00
   4  -1  15   38.10    6.10
  -4   1 -15   30.00    5.40
   4  -1  14   30.30    4.80
   4  -1  14   19.30    5.20
  -4   1 -14   23.70    4.80
   4  -1  13  444.46   20.50
   4  -1  13  409.16   22.00
  -4   1 -13  414.66   20.60
   4  -1  12   15.40    4.60
   4  -1  12   25.30    4.20
  -4   1 -12   21.30    4.20
   4  -1  11  509.15   23.00
  -4   1 -11  509.45   23.10
  -4   1 -11  499.75   24.30
   4  -1  10   69.59    5.50
  -4   1 -10   66.99    5.50
  -4   1 -10   61.49    6.30
  -4   1 -10   62.69    7.40
   4  -1   9  125.39    7.50
  -4   1  -9  126.69    7.40
  -4   1  -9  145.29    9.10
  -4   1  -9  132.99    9.80
   4  -1   8   20.80    2.80
  -4   1  -8   15.50    4.10
  -4   1  -8   14.00    3.60
  -4   1  -8   19.40    2.70
   4  -1   7   84.59    5.10
  -4   1  -7   83.19    6.60
  -4   1  -7   78.59    7.30
  -4   1  -7   86.19    5.00
   4  -1   6    5.10    1.50
  -4   1  -6    0.20    2.70
  -4   1  -6    2.30    2.50
  -4   1  -6    4.00    1.40
   4  -1   5 1292.97   53.29
  -4   1  -5 1274.17   53.19
  -4   1  -5 1373.76   55.59
  -4   1  -5 1320.07   54.99
   4  -1   4  489.85   20.10
  -4   1  -4  463.45   21.80
  -4   1  -4  530.65   22.50
  -4   1  -4  470.45   20.00
   4  -1   3  174.78    7.30
  -4   1  -3  166.58    7.40
  -4   1  -3  167.18    9.20
  -4   1  -3  174.88    9.70
   4  -1   2    1.10    0.60
   4  -1   2    0.70    2.00
  -4   1  -2    5.20    2.30
   4  -1   1  633.44   27.40
   4  -1   1  624.94   25.50
   4  -1   1  622.34   25.60
   4  -1   0    1.60    1.00
   4  -1   0    2.70    2.10
   4  -1   0    6.80    1.30
  -4   1   0    2.60    1.90
   4  -1  -1 2270.37  104.59
   4  -1  -1 2155.78  113.79
   4  -1  -1 2357.96  107.09
  -4   1   1 2264.57  111.59
   4  -1  -2  192.58    9.00
   4  -1  -2  184.58    8.90
   4  -1  -2  183.78    9.70
  -4   1   2  181.28    9.40
   4  -1  -3  305.47   13.30
   4  -1  -3  280.07   13.60
   4  -1  -3  275.07   13.10
  -4   1   3  276.47   13.20
   4  -1  -4  201.78   10.40
   4  -1  -4  210.28   10.50
   4  -1  -4  213.78   10.70
   4  -1  -5   13.60    2.80
   4  -1  -5   14.10    2.80
   4  -1  -5    7.80    2.50
  -4   1   5   16.50    2.60
   4  -1  -6  201.28   10.70
   4  -1  -6  215.78   11.20
   4  -1  -6  210.58   11.20
  -4   1   6  208.78   10.50
   4  -1  -7   86.89    6.40
   4  -1  -7   95.79    7.00
  -4   1   7   92.89    6.00
   4  -1  -8    4.00    2.50
   4  -1  -8    4.80    2.80
  -4   1   8    3.50    2.30
   4  -1  -9   41.30    5.30
   4  -1  -9   51.79    5.20
  -4   1   9   33.10    5.40
  -4   1   9   44.20    4.50
   4  -1 -10  113.99    8.20
   4  -1 -10  113.49    8.90
  -4   1  10  131.19    9.80
  -4   1  10  119.79    7.60
   4  -1 -11   -1.10    3.70
   4  -1 -11    4.90    3.30
  -4   1  11    4.80    4.10
  -4   1  11    0.30    2.70
   4  -1 -12   27.10    5.50
   4  -1 -12   32.40    4.90
  -4   1  12   20.50    5.40
  -4   1  12   19.30    4.00
   4  -1 -13   12.10    4.90
   4  -1 -13    5.70    3.70
  -4   1  13    8.50    4.80
  -4   1  13    5.60    3.40
   4  -1 -14    9.20    4.00
  -4   1  14   14.20    4.00
   4  -1 -15   50.29    8.00
  -4   1  15   48.80    6.20
   4  -1 -16    1.50    5.20
  -4   1  16    8.70    4.20
   4  -1 -17  103.39   11.20
   4  -1 -18   11.00    6.50
  -4   1  18    0.30    4.10
   4  -1 -19    7.20    6.60
  -4   1  19   18.70    5.70
   4  -1 -20    0.90    6.20
  -4   1  20   12.30    5.50
   3  -1  20   -1.70    6.10
  -3   1 -20   -3.10    5.30
   3  -1  19   15.20    5.90
  -3   1 -19   10.50    6.00
   3  -1  18   21.10    6.30
  -3   1 -18   37.00    7.40
   3  -1  17   14.20    5.70
  -3   1 -17   18.30    5.50
   3  -1  16    0.10    4.60
   3  -1  16    2.80    3.50
  -3   1 -16   -5.90    3.70
   3  -1  15    0.30    5.50
   3  -1  15    4.70    4.70
  -3   1 -15    6.90    4.20
   3  -1  14   -4.10    6.10
   3  -1  14    4.90    3.30
  -3   1 -14    4.00    3.80
   3  -1  13   50.19    5.90
   3  -1  13   64.59    7.40
  -3   1 -13   47.40    6.10
  -3   1 -13   64.69    6.80
   3  -1  12  310.17   15.20
   3  -1  12  285.57   16.00
  -3   1 -12  302.07   15.40
  -3   1 -12  280.07   15.50
   3  -1  11   47.00    5.90
   3  -1  11   58.39    5.50
  -3   1 -11   65.19    6.50
  -3   1 -11   53.59    5.50
   3  -1  10  190.58   11.10
   3  -1  10  186.98   10.10
  -3   1 -10  186.98   10.90
  -3   1 -10  176.48   11.00
   3  -1   9   38.70    5.10
   3  -1   9   42.90    4.20
  -3   1  -9   39.90    4.20
  -3   1  -9   35.50    4.80
   3  -1   8   11.80    2.40
   3  -1   8   14.10    3.20
  -3   1  -8   13.80    3.00
  -3   1  -8   21.20    2.90
   3  -1   7   -0.30    1.40
  -3   1  -7    1.80    2.00
  -3   1  -7    0.20    1.50
   3  -1   6   13.40    2.00
  -3   1  -6   12.80    3.10
  -3   1  -6   12.10    2.50
  -3   1  -6   14.60    1.90
   3  -1   5   25.50    2.30
  -3   1  -5   24.80    2.20
  -3   1  -5   22.90    3.10
   3  -1   4   21.60    1.90
  -3   1  -4   21.60    1.80
  -3   1  -4   20.20    3.30
  -3   1  -4   27.20    3.20
   3  -1   3   29.10    1.80
  -3   1  -3   32.70    3.60
  -3   1  -3   25.40    2.90
  -3   1  -3   29.50    1.70
   3  -1   2 1463.25   62.09
   3  -1   2 1621.94   79.99
  -3   1  -2 1428.96   62.89
  -3   1  -2 1453.75   78.79
   3  -1   1  623.14   25.00
   3  -1   1  615.84   25.10
   3  -1   1  628.24   26.50
  -3   1  -1  610.54   26.40
   3  -1   0  455.75   18.30
   3  -1   0  449.16   18.40
   3  -1   0  428.96   19.40
  -3   1   0  445.96   19.40
   3  -1  -1    9.90    1.40
   3  -1  -1   10.30    1.90
   3  -1  -1   11.10    1.50
  -3   1   1    7.10    1.70
   3  -1  -2    1.30    1.30
   3  -1  -2    2.40    1.20
   3  -1  -2    2.00    1.20
  -3   1   2    2.50    1.40
   3  -1  -3   68.19    4.40
   3  -1  -3   67.89    4.50
  -3   1   3   65.99    4.30
  -3   1   3   70.79    4.70
   3  -1  -4  145.79    7.70
   3  -1  -4  145.99    7.60
  -3   1   4  142.59    7.30
  -3   1   4  143.39    7.90
   3  -1  -5   14.10    2.20
   3  -1  -5   18.00    2.90
  -3   1   5   18.80    2.90
  -3   1   5   12.80    2.10
   3  -1  -6   69.39    4.90
   3  -1  -6   75.59    5.50
  -3   1   6   69.99    5.70
  -3   1   6   69.09    4.70
   3  -1  -7   63.29    4.90
  -3   1   7   64.99    6.20
   3  -1  -8  941.71   38.90
   3  -1  -8  908.81   37.90
  -3   1   8  811.62   38.80
  -3   1   8  902.51   37.60
   3  -1  -9  383.76   19.60
   3  -1  -9  434.36   19.10
  -3   1   9  410.56   18.60
  -3   1   9  399.16   20.10
   3  -1 -10  187.38   11.80
   3  -1 -10  202.68   11.00
  -3   1  10  205.38   12.20
  -3   1  10  197.68   10.50
   3  -1 -11   72.49    7.30
   3  -1 -11   82.99    6.80
  -3   1  11   80.09    6.30
  -3   1  11   93.89    8.60
   3  -1 -12   70.69    8.00
   3  -1 -12   84.79    7.10
  -3   1  12   99.59   10.00
  -3   1  12   77.19    6.70
   3  -1 -13   21.10    7.30
   3  -1 -13   16.20    5.20
  -3   1  13   17.80    4.00
  -3   1  13   20.60    5.20
   3  -1 -14    4.20    3.80
   3  -1 -14    5.10    4.40
  -3   1  14    5.70    3.60
  -3   1  14    5.60    4.60
   3  -1 -15   24.90    6.30
   3  -1 -15   24.70    5.10
  -3   1  15   21.80    4.60
   3  -1 -16    1.90    5.00
  -3   1  16    3.20    4.00
   3  -1 -17   -5.10    4.60
  -3   1  17    6.90    4.40
   3  -1 -18   14.10    6.30
  -3   1  18   18.40    5.50
   3  -1 -19   57.59    9.10
  -3   1  19   39.70    6.80
   3  -1 -20   -3.80    5.90
  -3   1  20    3.30    4.90
   3  -1 -21    6.50    7.10
  -3   1  21    4.40    4.90
   2  -1  21    4.40    7.60
  -2   1 -21    0.40    6.00
   2  -1  20   23.50    6.50
  -2   1 -20   25.70    7.30
   2  -1  19   31.90    6.60
  -2   1 -19   17.90    6.80
   2  -1  18   29.80    6.30
  -2   1 -18   35.20    7.10
   2  -1  17    4.40    4.60
  -2   1 -17    9.30    6.60
   2  -1  16   18.40    4.60
   2  -1  16   16.50    4.90
  -2   1 -16   13.90    5.40
   2  -1  15    8.30    3.80
   2  -1  15    7.50    4.30
  -2   1 -15    3.70    4.10
   2  -1  14   29.00    5.00
   2  -1  14   26.70    5.00
  -2   1 -14   17.60    4.60
  -2   1 -14   17.60    4.30
   2  -1  13   86.79    7.40
   2  -1  13   73.59    7.20
  -2   1 -13   90.19    7.50
  -2   1 -13   72.89    7.40
   2  -1  12  244.08   13.30
   2  -1  12  252.47   13.80
  -2   1 -12  247.78   13.50
  -2   1 -12  244.58   13.70
   2  -1  11   92.19    6.90
   2  -1  11   91.59    7.40
  -2   1 -11  100.09    7.20
  -2   1 -11   92.09    7.30
   2  -1  10  617.84   27.60
   2  -1  10  640.54   28.00
  -2   1 -10  616.04   27.90
  -2   1 -10  618.44   27.80
   2  -1   9  846.22   35.90
  -2   1  -9  826.32   35.60
  -2   1  -9  809.92   35.60
   2  -1   8  544.35   24.00
   2  -1   8  533.35   23.50
  -2   1  -8  540.65   23.70
  -2   1  -8  528.25   23.80
   2  -1   7  317.27   15.40
   2  -1   7  296.07   13.90
  -2   1  -7  313.67   14.30
  -2   1  -7  286.57   13.90
   2  -1   6 1124.89   46.90
   2  -1   5  452.95   19.30
   2  -1   5  449.76   19.90
  -2   1  -5  466.15   19.90
  -2   1  -5  450.75   19.30
   2  -1   4  521.35   21.50
  -2   1  -4  515.45   22.10
  -2   1  -4  504.75   21.40
  -2   1  -4  521.95   22.50
   2  -1   3   59.09    2.90
  -2   1  -3   55.09    3.60
  -2   1  -3   60.39    4.10
  -2   1  -3   55.19    2.80
   2  -1   2 1752.42   82.39
   2  -1   2 1737.73   71.09
  -2   1  -2 1704.03   82.69
  -2   1  -2 1629.04   70.19
   2  -1   1  199.38    9.10
  -2   1  -1  192.98    9.10
   2  -1   0 1536.75   72.99
   2  -1   0 1489.45   65.49
  -2   1   0 1552.84   72.99
   2  -1  -1  196.18    8.50
   2  -1  -1  188.68    8.90
  -2   1   1  195.28    8.90
  -2   1   1  203.68    8.70
   2  -1  -2 1776.82   79.89
   2  -1  -2 1643.34   77.19
  -2   1   2 1493.75   78.99
  -2   1   2 1608.44   76.19
   2  -1  -3   58.09    3.60
   2  -1  -3   53.09    3.60
  -2   1   3   62.49    3.90
  -2   1   3   56.79    3.50
   2  -1  -4  503.45   21.60
   2  -1  -4  501.75   22.00
  -2   1   4  541.75   22.20
  -2   1   4  495.25   21.50
   2  -1  -5  448.86   20.10
   2  -1  -5  461.35   19.70
  -2   1   5  450.15   20.20
  -2   1   5  457.95   19.50
   2  -1  -6 1182.48   48.40
  -2   1   6 1129.69   48.50
   2  -1  -7  297.17   13.90
  -2   1   7  285.57   13.00
  -2   1   7  254.77   13.70
   2  -1  -8  613.64   25.90
   2  -1  -8  561.74   24.90
  -2   1   8  534.75   25.70
   2  -1  -9  854.11   35.00
   2  -1  -9  776.32   35.60
  -2   1   9  816.42   34.50
  -2   1   9  796.82   35.70
   2  -1 -10  642.54   28.20
   2  -1 -10  636.94   29.10
  -2   1  10  633.34   29.00
  -2   1  10  625.44   27.70
   2  -1 -11  100.99    7.30
   2  -1 -11   93.19    8.10
  -2   1  11   92.29    6.80
  -2   1  11  104.19    8.00
   2  -1 -12  242.08   13.20
   2  -1 -12  269.67   14.50
  -2   1  12  247.38   12.80
  -2   1  12  213.08   13.70
   2  -1 -13   76.59    8.30
   2  -1 -13   94.79    7.80
  -2   1  13   92.39    8.90
  -2   1  13   92.69    7.30
   2  -1 -14   25.80    4.80
   2  -1 -14   29.20    6.20
  -2   1  14   23.90    5.20
  -2   1  14   20.30    4.20
   2  -1 -15   12.60    5.00
   2  -1 -15   11.30    4.10
  -2   1  15    5.80    3.70
   2  -1 -16   19.50    5.80
   2  -1 -17    0.60    4.90
  -2   1  17    4.70    4.20
   2  -1 -18   41.20    7.80
  -2   1  18   26.80    5.60
   2  -1 -19   28.70    7.50
  -2   1  19   30.20    6.30
   2  -1 -20   36.40    8.50
  -2   1  20   32.10    6.40
   2  -1 -21    0.80    6.20
  -2   1  21   -0.40    4.90
   1  -1  22    9.50    5.80
   1  -1  21    8.70    5.50
  -1   1 -21   -2.80    6.60
   1  -1  20   22.90    6.20
  -1   1 -20   37.40    8.30
   1  -1  19   22.10    5.70
  -1   1 -19   24.10    6.90
   1  -1  18   21.00    5.60
  -1   1 -18   20.40    6.40
   1  -1  17    0.50    4.20
  -1   1 -17   -0.10    5.10
   1  -1  16   29.00    5.60
   1  -1  16   19.00    4.80
  -1   1 -16   17.90    5.40
   1  -1  15   19.90    5.10
   1  -1  15   13.90    4.30
  -1   1 -15   10.60    4.20
  -1   1 -15    8.30    4.60
   1  -1  14   58.29    6.50
   1  -1  14   64.79    7.40
  -1   1 -14   64.09    7.40
  -1   1 -14   62.99    6.50
   1  -1  13  172.28   10.90
   1  -1  13  173.98   10.50
  -1   1 -13  165.98   11.10
  -1   1 -13  155.28   10.30
   1  -1  12    3.70    2.90
   1  -1  12    2.60    2.90
  -1   1 -12    3.60    3.30
  -1   1 -12   -1.30    2.70
   1  -1  11   24.40    4.00
   1  -1  11    9.30    3.00
  -1   1 -11   11.50    3.30
  -1   1 -11    6.90    3.20
   1  -1  10   50.09    5.40
   1  -1  10   43.10    4.70
  -1   1 -10   57.49    5.40
  -1   1 -10   48.40    5.20
   1  -1   9 1873.21   77.39
  -1   1  -9 1870.91   77.09
   1  -1   8  397.96   18.40
   1  -1   8  392.16   18.60
  -1   1  -8  413.76   18.80
  -1   1  -8  424.76   18.50
   1  -1   7   60.59    4.60
   1  -1   7   58.79    4.60
  -1   1  -7   57.79    4.30
  -1   1  -7   64.19    4.70
   1  -1   6    5.30    1.80
   1  -1   6    2.80    1.50
  -1   1  -6    4.10    1.70
  -1   1  -6    2.90    1.50
   1  -1   5  517.65   22.90
   1  -1   5  557.64   23.10
  -1   1  -5  555.84   23.10
  -1   1  -5  533.75   22.90
   1  -1   4  123.49    6.10
   1  -1   4  120.49    6.10
  -1   1  -4  126.69    6.10
  -1   1  -4  119.89    6.10
   1  -1   3 1031.50   52.69
   1  -1   3 1077.29   51.99
  -1   1  -3 1030.70   51.49
  -1   1  -3 1052.59   53.29
  -1   1  -2   16.70    1.30
  -1   1  -2   18.90    1.80
  -1   1  -2   15.80    1.20
   1  -1   1   67.79    3.00
   1  -1   1   68.59    3.40
  -1   1  -1   66.09    3.40
  -1   1  -1   69.39    3.00
   1  -1   0  162.88    7.30
   1  -1   0  170.88    7.00
  -1   1   0  168.48    7.30
  -1   1   0  168.48    7.00
   1  -1  -1 3011.10  125.89
   1  -1  -1 2712.93  125.79
  -1   1   1 2945.31  125.59
  -1   1   1 3248.97  127.19
   1  -1  -2  402.46   16.90
   1  -1  -2  394.66   16.90
  -1   1   2  409.66   17.00
  -1   1   2  411.26   16.90
   1  -1  -3   41.20    2.80
   1  -1  -3   47.40    3.00
  -1   1   3   42.90    2.70
  -1   1   3   49.00    3.10
   1  -1  -4    2.70    1.20
   1  -1  -4    4.60    1.40
  -1   1   4    5.60    1.50
  -1   1   4    2.20    1.10
   1  -1  -5  120.29    6.20
   1  -1  -5  121.59    6.60
  -1   1   5  119.09    6.50
  -1   1   5  116.79    6.10
   1  -1  -6   25.10    3.10
   1  -1  -6   25.30    2.80
  -1   1   6   30.30    3.30
  -1   1   6   24.30    2.60
   1  -1  -7    3.20    2.00
   1  -1  -7    5.30    1.90
  -1   1   7    3.40    2.20
  -1   1   7    4.60    1.70
   1  -1  -8   15.70    2.90
  -1   1   8    9.30    2.40
  -1   1   8   16.00    3.20
   1  -1  -9   -0.80    2.30
   1  -1  -9    0.80    2.10
  -1   1   9    2.60    2.00
  -1   1   9    0.20    2.10
   1  -1 -10    4.10    2.90
   1  -1 -10    1.70    2.40
  -1   1  10    1.80    2.50
  -1   1  10    1.00    2.30
   1  -1 -11 1521.45   63.69
   1  -1 -11 1468.75   64.49
  -1   1  11 1494.95   63.49
  -1   1  11 1603.24   64.69
   1  -1 -12    3.50    2.80
   1  -1 -12    1.50    3.40
  -1   1  12    6.00    3.10
  -1   1  12    4.90    3.50
   1  -1 -13    1.40    3.00
   1  -1 -13    0.00    3.40
  -1   1  13   -0.60    2.90
   1  -1 -14    2.90    4.00
   1  -1 -14    8.80    3.90
  -1   1  14    6.00    3.90
  -1   1  14    5.60    3.70
   1  -1 -15    9.90    4.20
   1  -1 -15   10.90    4.80
  -1   1  15   10.40    4.00
   1  -1 -16   34.10    7.00
   1  -1 -17   15.50    6.20
  -1   1  17   10.70    4.80
   1  -1 -18   20.60    6.60
  -1   1  18   15.30    5.00
   1  -1 -19    3.70    5.80
  -1   1  19    8.20    5.50
   1  -1 -20   10.10    7.10
  -1   1  20   11.50    5.70
  -1   1  21    2.00    5.20
   0  -1  22   -3.70    5.00
   0   1 -22  -16.50    5.40
   0  -1  21   -3.50    4.60
   0   1 -21   -7.40    5.60
   0  -1  20    8.50    5.00
   0   1 -20   -2.00    5.80
   0  -1  19   -4.10    4.00
   0   1 -19    3.90    5.60
   0  -1  18   62.89    7.10
   0   1 -18   71.39    9.30
   0   1 -17  -11.60    4.20
   0  -1  16  330.17   17.60
   0   1 -16  340.27   19.60
   0   1 -16  348.97   18.10
   0  -1  15    0.00    3.20
   0  -1  15   -3.30    3.40
   0   1 -15    1.70    3.40
   0   1 -15    0.10    4.30
   0  -1  14    1.80    3.00
   0   1 -14   -2.20    3.40
   0   1 -14    2.30    3.10
   0  -1  13    0.40    3.30
   0  -1  13    2.50    2.90
   0   1 -13   -1.20    2.80
   0   1 -13    0.30    3.20
   0  -1  12  229.08   12.80
   0  -1  12  200.08   11.50
   0   1 -12  220.68   12.90
   0   1 -12  212.48   11.70
   0  -1  11   -2.80    2.20
   0  -1  11    1.40    2.60
   0   1 -11    1.40    2.70
   0   1 -11    0.00    2.20
   0  -1  10  369.06   18.40
   0  -1  10  398.36   17.60
   0   1 -10  367.66   18.60
   0   1 -10  379.16   17.70
   0  -1   9   -2.00    1.70
   0  -1   9    3.00    2.20
   0   1  -9   -1.40    1.80
   0   1  -9    1.50    2.60
   0  -1   8   69.39    4.80
   0  -1   8   63.79    7.70
   0   1  -8   69.69    5.60
   0   1  -8   68.59    4.90
   0  -1   7    0.50    1.30
   0  -1   7    0.40    1.70
   0   1  -7    1.10    1.70
   0   1  -7   -1.30    1.30
   0  -1   6   65.19    4.50
   0  -1   6   58.49    3.80
   0   1  -6   51.99    3.70
   0   1  -6   60.09    4.40
   0  -1   5   -0.20    1.00
   0  -1   5    0.40    1.40
   0   1  -5   -0.60    1.20
   0   1  -5    0.70    1.00
   0  -1   4  191.08    8.30
   0   1  -4  187.18    8.30
   0   1  -4  179.58    8.90
   0  -1   3    8.20    1.40
   0  -1   3   -0.30    0.50
   0   1  -3   -0.80    0.80
   0   1  -3   -0.60    0.50
   0  -1   2 4143.09  177.58
   0  -1   2 4278.87  170.18
   0   1  -2 4028.10  177.18
   0   1  -2 4220.98  170.28
   0  -1   1    0.50    0.20
   0  -1   1   -0.30    0.40
   0   1  -1    1.00    0.50
   0  -1   0 1329.47   62.89
   0  -1   0 1477.65   58.59
   0   1   0 1397.76   63.09
   0  -1  -1    0.40    0.40
   0  -1  -1   -0.20    0.40
   0   1   1    0.60    0.50
   0   1   1    0.00    0.40
   0  -1  -2 3967.30  164.68
   0  -1  -2 3570.04  167.28
   0   1   2 4427.06  169.48
   0   1   2 3773.72  164.78
   0  -1  -3    0.30    0.90
   0  -1  -3    0.30    0.90
   0   1   3   -0.20    0.90
   0   1   3    0.40    0.90
   0  -1  -4 2662.73  123.59
   0  -1  -4 2634.64  117.89
   0   1   4 2573.04  122.49
   0   1   4 2639.54  118.59
   0  -1  -5    0.90    1.30
   0  -1  -5   -1.60    1.10
   0   1   5   -1.90    1.10
   0   1   5    0.20    1.30
   0  -1  -6 2376.66  115.69
   0  -1  -6 2411.36  123.49
   0   1   6 2504.65  117.79
   0   1   6 2510.85  124.19
   0  -1  -7    0.10    1.70
   0  -1  -7    0.40    1.90
   0   1   7   -0.70    1.50
   0   1   7   -0.60    1.70
   0  -1  -8  107.89    6.90
   0  -1  -8  101.79    6.40
   0   1   8   95.39    6.50
   0  -1  -9    0.60    2.40
   0  -1  -9   -1.50    1.90
   0   1   9   -2.00    1.90
   0   1   9   -0.60    1.90
   0  -1 -10  649.83   29.30
   0  -1 -10  665.23   29.90
   0   1  10  704.63   29.90
   0   1  10  640.04   29.30
   0  -1 -11   -3.50    2.60
   0  -1 -11   -0.90    2.80
   0   1  11   -0.60    2.60
   0   1  11    1.50    2.80
   0  -1 -12 1834.52   76.39
   0  -1 -12 1835.62   77.19
   0   1  12 1871.01   76.99
   0   1  12 1776.32   76.19
   0  -1 -13    0.00    3.50
   0   1  13    4.40    3.20
   0   1  13    3.30    3.30
   0  -1 -14    2.90    3.70
   0  -1 -14   11.30    4.80
   0   1  14   10.40    4.20
   0   1  14    4.80    3.70
   0  -1 -15   -2.70    3.80
   0   1  15   -2.60    3.40
   0   1  15    0.80    3.80
   0  -1 -16   54.79    8.10
   0   1  16   38.80    6.30
   0  -1 -17   -4.70    4.80
   0   1  17   -2.70    4.40
   0  -1 -18   12.80    6.00
   0   1  18    3.00    5.00
   0  -1 -19   -0.40    5.70
   0   1  19   -0.70    4.80
   0  -1 -20    5.20    6.40
   0   1  20    0.40    5.00
   0  -1 -21    4.70    7.40
  -1  -1  22    8.90    5.30
   1   1 -22    3.00    6.90
  -1  -1  21   -3.70    4.50
   1   1 -21    3.90    6.40
  -1  -1  20   19.70    5.50
   1   1 -20   19.90    7.70
  -1  -1  19   13.50    4.70
   1   1 -19   22.90    7.10
  -1  -1  18    0.00    3.70
   1   1 -18    1.10    5.60
  -1  -1  17   93.79    8.20
   1   1 -17   96.69   10.70
  -1  -1  16   10.60    4.00
   1   1 -16   24.70    5.00
  -1  -1  15   64.49    6.30
  -1  -1  15   70.39    8.30
   1   1 -15   46.80    7.20
  -1  -1  14   44.20    6.70
  -1  -1  14   43.10    5.20
   1   1 -14   34.40    6.00
   1   1 -14   47.90    5.80
  -1  -1  13  115.79    7.60
  -1  -1  13  107.29    9.00
   1   1 -13  113.89    9.20
   1   1 -13  102.89    7.80
  -1  -1  12   21.10    4.40
  -1  -1  12   15.10    3.20
   1   1 -12   17.30    3.40
   1   1 -12   10.60    3.90
  -1  -1  11   85.99    7.30
  -1  -1  11   75.49    5.80
   1   1 -11   85.59    8.00
   1   1 -11   82.69    6.20
  -1  -1  10  158.28   10.10
  -1  -1  10  170.88    9.30
   1   1 -10  154.98   10.20
   1   1 -10  157.58    8.90
  -1  -1   9   77.99    5.30
  -1  -1   9   81.89    6.60
   1   1  -9   77.69    5.40
   1   1  -9   78.79    6.50
  -1  -1   8  177.68   10.10
  -1  -1   8  181.98    8.70
   1   1  -8  169.18   10.00
   1   1  -8  174.48    8.90
   1   1  -7 1227.78   49.30
   1   1  -7 1164.78   50.29
  -1  -1   6  180.18    8.30
   1   1  -6  186.78    9.70
   1   1  -6  183.88    8.50
   1   1  -6  171.28    9.40
  -1  -1   5  461.25   19.60
   1   1  -5  498.35   19.70
   1   1  -5  468.85   20.70
   1   1  -5  449.86   20.80
  -1  -1   4    9.70    1.10
   1   1  -4    8.80    1.10
   1   1  -4    5.20    1.60
  -1  -1   3 1235.68   53.19
  -1  -1   3 1191.58   65.49
   1   1  -3 1186.48   65.49
   1   1  -3 1233.78   53.49
  -1  -1   2    1.70    1.00
  -1  -1   2    1.10    0.40
   1   1  -2    1.70    0.50
   1   1  -2    1.60    1.00
  -1  -1   1 1249.18   64.19
  -1  -1   1 1375.96   56.19
   1   1  -1 1273.17   64.29
   1   1  -1 1348.07   56.49
  -1  -1   0  200.48    8.30
   1   1   0  197.98    8.30
   1   1   0  186.98    8.60
  -1  -1  -1   47.30    2.70
  -1  -1  -1   52.09    2.90
   1   1   1   50.59    2.80
   1   1   1   43.40    2.80
  -1  -1  -2  157.28    7.20
  -1  -1  -2  145.19    7.10
   1   1   2  158.58    7.20
   1   1   2  161.88    7.30
  -1  -1  -3 3049.09  141.49
  -1  -1  -3 3414.06  145.39
   1   1   3 3151.98  142.89
   1   1   3 3340.37  145.29
  -1  -1  -4  634.84   26.10
  -1  -1  -4  632.94   26.20
   1   1   4  612.44   26.00
   1   1   4  600.14   26.20
  -1  -1  -5  187.18    9.30
  -1  -1  -5  192.58    9.30
   1   1   5  211.88    9.30
   1   1   5  171.48    9.30
  -1  -1  -6    4.90    1.80
  -1  -1  -6    2.10    1.80
   1   1   6    0.50    1.90
   1   1   6    4.00    1.70
  -1  -1  -7   27.60    3.40
  -1  -1  -7   35.60    3.70
   1   1   7   24.90    3.20
   1   1   7   34.20    3.90
  -1  -1  -8   68.79    5.60
  -1  -1  -8   75.19    5.60
   1   1   8   71.09    6.00
   1   1   8   72.99    5.40
  -1  -1  -9  183.28    9.90
  -1  -1  -9  179.08   10.10
   1   1   9  183.58   10.20
   1   1   9  158.98    9.60
  -1  -1 -10   19.20    3.70
  -1  -1 -10   12.10    3.30
   1   1  10   18.90    3.70
   1   1  10   19.80    4.00
  -1  -1 -11    5.80    2.90
  -1  -1 -11    5.60    3.20
   1   1  11   10.90    3.60
   1   1  11    0.00    2.60
  -1  -1 -12    1.00    2.80
  -1  -1 -12    2.50    3.30
   1   1  12    4.80    3.40
   1   1  12    3.10    3.00
  -1  -1 -13  228.08   13.80
  -1  -1 -13  230.98   13.20
   1   1  13  239.08   13.50
   1   1  13  221.08   13.30
  -1  -1 -14  125.99    9.50
  -1  -1 -14  116.79   10.30
   1   1  14  148.79   10.40
   1   1  14  151.18   10.20
  -1  -1 -15   -0.70    4.20
   1   1  15    1.90    3.70
   1   1  15    0.30    6.70
  -1  -1 -16   32.00    7.20
   1   1  16   39.80    6.60
  -1  -1 -17   10.50    5.80
   1   1  17   10.30    5.10
  -1  -1 -18    5.90    6.00
   1   1  18    7.70    5.40
  -1  -1 -19   -2.60    5.20
   1   1  19    0.00    5.10
  -1  -1 -20   -0.30    6.00
   1   1  20    3.20    5.30
  -1  -1 -21   -3.80    6.50
   1   1  21   -4.20    5.30
  -2  -1  22    3.30    4.80
   2   1 -22   11.00    7.60
  -2  -1  21   -4.50    4.00
  -2  -1  20    3.70    4.60
   2   1 -20   -1.10    6.00
  -2  -1  19   -0.60    4.00
   2   1 -19    0.50    5.60
  -2  -1  18   12.70    4.50
   2   1 -18   15.90    5.80
  -2  -1  17    4.30    3.60
   2   1 -17    8.20    4.20
   2   1 -17    8.50    5.30
  -2  -1  16    2.10    3.30
   2   1 -16    5.60    3.80
   2   1 -16    6.20    4.80
  -2  -1  15   -1.90    2.80
   2   1 -15    2.90    3.60
   2   1 -15   -0.50    4.00
  -2  -1  14   15.30    3.60
   2   1 -14   18.20    4.20
   2   1 -14    5.10    4.20
   2   1 -14    7.80    4.40
  -2  -1  13   50.19    5.10
   2   1 -13   54.19    6.90
   2   1 -13   58.59    5.70
   2   1 -13   54.79    7.30
  -2  -1  12   17.50    3.20
   2   1 -12   16.00    4.50
   2   1 -12   25.00    3.90
   2   1 -12   15.90    4.20
  -2  -1  11   44.10    4.30
   2   1 -11   27.10    4.90
   2   1 -11   44.40    5.70
   2   1 -11   40.60    4.40
  -2  -1  10  971.50   39.60
   2   1 -10  963.30   41.50
   2   1 -10  928.51   41.60
   2   1 -10  911.51   39.80
  -2  -1   9  939.31   39.50
   2   1  -9  956.80   39.80
   2   1  -9  988.20   41.70
   2   1  -9  915.21   41.20
  -2  -1   8  488.05   22.00
   2   1  -8  569.34   24.10
   2   1  -8  507.65   22.30
   2   1  -8  514.95   23.70
  -2  -1   7  205.18    9.60
   2   1  -7  214.48   11.40
   2   1  -7  206.08    9.80
   2   1  -7  202.58   10.90
  -2  -1   6  143.99    6.90
   2   1  -6  148.39    8.60
   2   1  -6  143.79    7.00
   2   1  -6  140.49    8.30
  -2  -1   5   24.80    2.10
   2   1  -5   25.10    2.20
   2   1  -5   27.90    3.40
   2   1  -5   27.40    3.60
   2   1  -4 1081.09   44.00
  -2  -1   3  494.65   21.70
  -2  -1   3  495.55   20.60
   2   1  -3  493.15   20.70
   2   1  -3  514.15   21.60
  -2  -1   2 1533.05   79.49
  -2  -1   2 1514.25   67.29
   2   1  -2 1553.04   78.29
   2   1  -2 1363.86   67.79
  -2  -1   1  754.02   31.50
  -2  -1   1  760.52   31.00
   2   1  -1  752.82   31.40
   2   1  -1  757.22   31.10
  -2  -1   0  837.82   42.40
  -2  -1   0  796.92   42.40
  -2  -1   0  853.01   47.40
   2   1   0  777.12   46.00
  -2  -1  -1 2661.53  119.69
  -2  -1  -1 2594.34  121.59
  -2  -1  -1 2768.92  119.09
   2   1   1 2656.33  121.39
  -2  -1  -2 2914.91  132.89
  -2  -1  -2 2811.62  130.09
   2   1   2 2907.81  130.79
   2   1   2 3042.90  132.39
  -2  -1  -3 1825.12   88.49
  -2  -1  -3 1796.12   86.89
   2   1   3 1765.62   87.69
   2   1   3 1692.23   86.69
  -2  -1  -4 2742.83  133.89
  -2  -1  -4 2960.60  133.89
   2   1   4 2772.82  133.09
   2   1   4 3004.90  135.29
  -2  -1  -5 1340.87   56.29
   2   1   5 1351.26   55.89
  -2  -1  -6   11.10    2.50
  -2  -1  -6   13.00    2.40
   2   1   6    6.60    3.70
   2   1   6   11.50    2.20
  -2  -1  -7   94.39    6.00
  -2  -1  -7   91.69    6.20
   2   1   7   83.59    6.50
  -2  -1  -8  959.30   39.70
   2   1   8  922.11   39.20
   2   1   8  885.61   39.80
  -2  -1  -9  443.66   21.10
  -2  -1  -9  473.75   21.40
   2   1   9  448.86   20.90
   2   1   9  462.85   21.70
  -2  -1 -10  110.49    7.70
  -2  -1 -10   91.49    7.30
   2   1  10   95.39    8.00
   2   1  10  106.09    7.30
  -2  -1 -11    3.30    3.20
  -2  -1 -11    3.70    2.90
   2   1  11    3.40    2.70
   2   1  11    3.30    3.60
  -2  -1 -12   24.70    4.60
  -2  -1 -12   30.30    5.00
   2   1  12   31.50    5.00
   2   1  12   39.10    6.00
  -2  -1 -13   11.30    4.10
  -2  -1 -13   17.10    4.40
   2   1  13   12.70    4.00
   2   1  13    2.70    3.90
  -2  -1 -14  202.68   13.40
   2   1  14  217.58   13.00
  -2  -1 -15  121.39   10.60
   2   1  15  110.19   10.20
   2   1  15  123.49    9.70
  -2  -1 -16   24.40    6.10
   2   1  16   11.90    5.40
  -2  -1 -17    2.80    4.70
   2   1  17   -5.30    4.60
  -2  -1 -18    6.00    5.50
   2   1  18    2.50    5.20
  -2  -1 -19   -0.90    5.30
   2   1  19   -5.50    5.30
  -2  -1 -20    0.80    6.10
   2   1  20   -5.20    5.40
  -3  -1  21   11.30    4.80
   3   1 -21   -6.50    6.40
  -3  -1  20   -6.50    3.80
   3   1 -20    5.00    6.20
  -3  -1  19    1.00    4.00
   3   1 -19    0.90    5.60
  -3  -1  18   57.89    6.50
   3   1 -18   46.60    8.80
  -3  -1  17   20.10    4.60
   3   1 -17   13.90    6.20
   3   1 -17   13.50    4.80
  -3  -1  16  169.88   11.00
   3   1 -16  194.58   14.20
   3   1 -16  190.58   11.90
  -3  -1  15   31.20    4.70
   3   1 -15   31.70    6.70
   3   1 -15   26.30    5.20
  -3  -1  14   25.00    4.10
   3   1 -14   28.60    4.80
   3   1 -14   21.50    6.00
  -3  -1  13   24.10    3.70
   3   1 -13   13.60    4.90
   3   1 -13   25.20    5.30
   3   1 -13   19.00    3.90
  -3  -1  12    1.30    2.40
   3   1 -12    4.10    3.90
   3   1 -12    6.20    3.50
   3   1 -12    1.10    2.50
  -3  -1  11   19.70    3.20
   3   1 -11   22.00    5.00
   3   1 -11   26.00    3.70
   3   1 -11   22.70    4.80
  -3  -1  10   95.49    6.00
   3   1 -10   95.09    8.10
   3   1 -10   82.29    7.30
   3   1 -10   88.29    6.20
  -3  -1   9  113.19    6.60
   3   1  -9  122.59    8.80
   3   1  -9  113.39    6.90
   3   1  -9  121.79    8.40
  -3  -1   8  365.66   15.90
   3   1  -8  364.16   16.20
   3   1  -8  349.67   17.60
   3   1  -8  343.97   17.80
  -3  -1   7    0.40    1.40
   3   1  -7    2.30    1.60
   3   1  -7   -2.00    2.40
   3   1  -7   -1.00    2.10
  -3  -1   6  935.11   38.80
   3   1  -6  941.91   40.50
   3   1  -6  954.60   39.20
  -3  -1   5  430.16   18.80
   3   1  -5  464.75   21.20
   3   1  -5  447.56   19.10
   3   1  -5  435.36   20.50
  -3  -1   4   86.89    6.20
  -3  -1   4   92.69    4.90
   3   1  -4   94.29    6.20
   3   1  -4   91.79    5.20
  -3  -1   3    0.50    1.70
  -3  -1   3    1.50    1.10
   3   1  -3    0.70    1.40
   3   1  -3   -0.70    1.50
  -3  -1   2  120.69    6.20
  -3  -1   2  122.19    7.00
   3   1  -2  138.59    6.90
   3   1  -2  115.89    6.40
  -3  -1   1   11.30    1.80
  -3  -1   1   11.00    2.20
   3   1  -1   11.50    2.00
   3   1  -1    8.90    1.90
  -3  -1   0  317.07   14.00
  -3  -1   0  308.27   13.90
  -3  -1   0  307.47   14.10
   3   1   0  324.87   14.00
  -3  -1  -1   19.10    2.40
  -3  -1  -1   20.60    2.60
  -3  -1  -1   26.70    2.80
   3   1   1   19.10    2.30
  -3  -1  -2  453.75   20.50
  -3  -1  -2  482.85   20.80
  -3  -1  -2  508.55   21.10
   3   1   2  469.25   20.40
  -3  -1  -3   43.10    4.30
  -3  -1  -3   33.90    3.50
  -3  -1  -3   37.70    3.30
   3   1   3   38.00    3.20
  -3  -1  -4  180.48    9.40
  -3  -1  -4  214.68   10.10
   3   1   4  196.08    9.40
  -3  -1  -5  113.89    6.60
  -3  -1  -5  116.09    7.20
   3   1   5  116.19    6.50
   3   1   5  122.99    7.30
  -3  -1  -6  300.77   14.70
  -3  -1  -6  304.27   14.10
   3   1   6  282.97   14.60
   3   1   6  306.47   14.00
  -3  -1  -7   82.09    6.10
  -3  -1  -7  102.19    6.80
   3   1   7   85.09    5.90
   3   1   7  107.29    7.30
  -3  -1  -8   63.49    5.60
  -3  -1  -8   52.89    5.50
   3   1   8   63.99    6.50
   3   1   8   62.29    5.20
  -3  -1  -9   18.50    3.70
  -3  -1  -9   16.40    3.40
   3   1   9   17.20    3.90
   3   1   9   24.90    3.80
  -3  -1 -10   66.59    6.30
  -3  -1 -10   76.39   10.20
   3   1  10   69.99    6.00
   3   1  10   74.29    7.40
  -3  -1 -11   15.80    4.30
  -3  -1 -11   15.50    3.80
   3   1  11   11.40    4.30
   3   1  11   15.20    3.60
  -3  -1 -12   32.60    5.30
  -3  -1 -12   40.00    5.60
   3   1  12   39.00    5.20
   3   1  12   39.60    6.30
  -3  -1 -13   61.19    7.30
   3   1  13   70.99    8.00
   3   1  13   60.59    7.70
  -3  -1 -14    9.60    4.30
   3   1  14   12.40    4.10
   3   1  14    8.40    5.00
  -3  -1 -15   46.90    6.90
   3   1  15   39.10    6.10
   3   1  15   42.40    7.40
  -3  -1 -16    7.40    4.90
   3   1  16   13.50    5.70
  -3  -1 -17   -1.70    4.40
   3   1  17    3.30    6.10
  -3  -1 -18    6.30    5.40
   3   1  18    2.80    6.30
  -3  -1 -19    8.00    5.80
   3   1  19    6.80    6.40
  -4  -1  20    4.20    4.40
   4   1 -20   -1.40    6.30
  -4  -1  19    6.30    4.40
   4   1 -19   10.40    6.90
  -4  -1  18   11.70    4.30
   4   1 -18   27.20    7.30
  -4  -1  17   59.99    6.50
   4   1 -17   52.49    8.50
  -4  -1  16    7.50    3.60
   4   1 -16    3.70    3.50
   4   1 -16    3.70    5.20
  -4  -1  15  106.39    8.00
   4   1 -15  105.59   10.70
   4   1 -15  111.89    8.70
  -4  -1  14   -1.20    2.80
   4   1 -14    0.90    4.30
   4   1 -14    4.40    3.40
  -4  -1  13   96.69    7.00
   4   1 -13   92.79    9.80
   4   1 -13   91.69    7.50
  -4  -1  12   29.40    4.10
   4   1 -12   37.40    5.90
   4   1 -12   25.10    4.20
   4   1 -12   31.00    6.10
  -4  -1  11  150.48    8.80
   4   1 -11  174.88   11.80
   4   1 -11  152.58    9.40
   4   1 -11  167.48   11.20
  -4  -1  10   70.29    5.50
   4   1 -10   83.59    7.90
   4   1 -10   79.29    6.10
   4   1 -10   72.99    7.90
  -4  -1   9   11.00    2.50
   4   1  -9   15.40    4.00
   4   1  -9   14.00    4.20
   4   1  -9   10.00    2.90
  -4  -1   8  146.59    7.90
   4   1  -8  151.78    8.50
   4   1  -8  151.78   10.20
   4   1  -8  153.38    9.90
  -4  -1   7 1646.84   68.19
   4   1  -7 1700.13   70.39
   4   1  -7 1667.93   69.99
  -4  -1   6    3.50    1.90
   4   1  -6   11.60    3.20
   4   1  -6    6.20    2.20
   4   1  -6    6.20    3.20
  -4  -1   4  203.58   10.00
   4   1  -4  211.48   10.50
   4   1  -4  221.48   11.20
  -4  -1   3  264.17   13.60
  -4  -1   3  288.37   12.50
   4   1  -3  260.97   12.80
  -4  -1   2  216.58    9.80
  -4  -1   2  195.78   10.40
   4   1  -2  197.98   10.00
   4   1  -2  182.68    9.90
  -4  -1   1  383.96   18.30
  -4  -1   1  405.86   17.90
   4   1  -1  417.66   18.00
  -4  -1   0  219.88   11.40
  -4  -1   0  239.88   11.40
   4   1   0  241.78   11.10
  -4  -1  -1 2204.88   89.99
  -4  -1  -2   30.60    3.60
  -4  -1  -2   18.10    3.50
  -4  -1  -2   15.80    2.60
   4   1   2   12.90    2.30
  -4  -1  -3   72.99    5.80
  -4  -1  -3   59.29    4.70
  -4  -1  -3   74.19    5.60
   4   1   3   72.39    4.70
  -4  -1  -4    2.90    2.70
  -4  -1  -4    2.30    1.80
  -4  -1  -4   -1.00    2.20
   4   1   4    2.20    1.80
  -4  -1  -5 1021.70   44.60
  -4  -1  -5 1076.49   45.40
  -4  -1  -5 1129.59   46.20
   4   1   5 1058.49   44.50
  -4  -1  -6  270.67   14.80
  -4  -1  -6  281.47   14.10
  -4  -1  -6  294.57   15.60
   4   1   6  349.17   15.10
  -4  -1  -7  786.72   34.90
  -4  -1  -7  771.62   34.20
   4   1   7  766.92   33.10
  -4  -1  -8   26.50    4.60
  -4  -1  -8   18.00    3.40
   4   1   8   23.60    3.50
  -4  -1  -9  128.09    8.30
  -4  -1  -9  119.99    8.80
   4   1   9  128.29    8.00
   4   1   9  113.09    9.20
  -4  -1 -10    2.80    2.80
  -4  -1 -10    1.80    3.20
   4   1  10    0.60    2.50
   4   1  10    1.30    3.70
  -4  -1 -11  131.89    9.10
   4   1  11  127.89    8.60
   4   1  11  126.99   10.40
  -4  -1 -12   14.30    4.20
   4   1  12    9.80    4.80
   4   1  12   16.60    3.90
  -4  -1 -13   -2.30    3.30
   4   1  13    0.60    4.60
   4   1  13   -0.80    3.40
  -4  -1 -14    1.60    3.70
   4   1  14   -2.80    4.50
   4   1  14   -2.00    2.90
  -4  -1 -15    4.60    4.20
   4   1  15   -7.30    4.50
  -4  -1 -16    7.30    4.80
   4   1  16    8.50    5.80
  -4  -1 -17   11.70    5.20
   4   1  17   -3.50    5.60
  -4  -1 -18    2.00    5.00
   4   1  18    4.80    5.80
  -5  -1  18    1.10    3.90
   5   1 -18   -5.90    5.60
  -5  -1  17    8.80    4.00
   5   1 -17   -2.10    5.50
  -5  -1  16   18.30    4.20
   5   1 -16   13.40    6.70
   5   1 -16   22.30    5.60
  -5  -1  15   90.89    7.90
   5   1 -15   94.19   10.90
   5   1 -15  112.69    9.30
  -5  -1  14  188.78   11.00
   5   1 -14  191.68   14.40
   5   1 -14  191.78   13.30
  -5  -1  13   10.00    3.40
   5   1 -13   10.60    5.40
   5   1 -13    9.40    3.70
  -5  -1  12    9.90    3.20
   5   1 -12   12.00    3.60
   5   1 -12    2.80    4.70
  -5  -1  11    0.10    2.40
   5   1 -11    1.30    4.10
   5   1 -11    0.00    2.70
   5   1 -11   -2.60    3.40
  -5  -1  10   -0.10    2.30
   5   1 -10    2.10    3.70
   5   1 -10    3.20    3.40
   5   1 -10   -0.10    2.60
  -5  -1   9   28.20    3.60
   5   1  -9   26.50    4.20
   5   1  -9   28.10    5.40
   5   1  -9   29.00    5.50
  -5  -1   8   18.00    3.00
   5   1  -8   19.60    4.40
   5   1  -8   22.80    4.90
   5   1  -8   20.50    3.50
  -5  -1   7   23.10    3.20
   5   1  -7   14.60    4.20
   5   1  -7   17.40    3.40
   5   1  -7   20.40    4.40
  -5  -1   6  144.79    8.00
   5   1  -6  155.58   10.10
   5   1  -6  133.39    8.60
   5   1  -6  147.99    9.50
  -5  -1   5  261.77   12.50
   5   1  -5  259.07   13.00
   5   1  -5  266.57   13.70
   5   1  -5  255.57   14.20
  -5  -1   4  633.14   26.80
   5   1  -4  552.24   27.00
   5   1  -4  643.14   27.70
   5   1  -4  655.73   28.30
  -5  -1   3    6.00    2.20
   5   1  -3    5.70    2.70
   5   1  -3    9.50    2.80
  -5  -1   2   26.90    4.10
  -5  -1   2   21.10    3.20
   5   1  -2   23.80    3.70
   5   1  -2   24.60    3.50
  -5  -1   1   24.40    3.50
  -5  -1   1   29.30    3.90
  -5  -1   1   28.20    3.70
   5   1  -1   25.00    3.70
  -5  -1   0    4.50    2.50
  -5  -1   0    4.30    2.50
  -5  -1   0    7.70    2.60
   5   1   0    4.30    2.10
  -5  -1  -1   12.80    3.20
  -5  -1  -1   11.10    2.70
  -5  -1  -1   16.30    3.40
   5   1   1   12.00    2.50
  -5  -1  -2   24.00    4.00
  -5  -1  -2   24.40    3.80
  -5  -1  -2   23.60    3.30
   5   1   2   21.10    2.90
  -5  -1  -3   88.09    7.30
  -5  -1  -3   86.19    6.10
  -5  -1  -3   92.49    7.10
   5   1   3   89.09    5.70
  -5  -1  -4  166.88    9.70
  -5  -1  -4  194.68   11.30
  -5  -1  -4  187.58   10.90
   5   1   4  202.98    9.70
  -5  -1  -5   42.60    5.60
  -5  -1  -5   47.10    4.70
  -5  -1  -5   53.19    5.60
   5   1   5   49.30    4.50
  -5  -1  -6  284.77   15.70
  -5  -1  -6  243.18   14.80
  -5  -1  -6  307.67   16.70
   5   1   6  297.37   13.60
  -5  -1  -7   11.80    4.30
  -5  -1  -7    6.40    2.70
  -5  -1  -7   15.10    4.00
   5   1   7   12.20    2.80
  -5  -1  -8   12.30    3.20
  -5  -1  -8   14.80    4.80
  -5  -1  -8   18.30    4.40
   5   1   8   10.90    3.00
  -5  -1  -9   66.89    8.20
  -5  -1  -9   71.89    6.40
   5   1   9   81.99    6.40
  -5  -1 -10   -1.00    4.30
  -5  -1 -10    3.60    3.10
   5   1  10    3.60    2.70
  -5  -1 -11   22.10    6.10
  -5  -1 -11   31.30    4.90
   5   1  11   34.80    4.60
  -5  -1 -12   17.50    6.00
  -5  -1 -12   19.50    4.60
   5   1  12   11.70    3.70
  -5  -1 -13    6.00    5.60
  -5  -1 -13    4.00    3.60
   5   1  13    1.60    2.90
  -5  -1 -14    6.90    4.20
  -5  -1 -14   -2.80    5.20
   5   1  14   -0.90    3.00
  -5  -1 -15   -2.10    4.60
  -5  -1 -16   -3.70    4.20
  -6  -1  16    7.50    4.10
   6   1 -16   15.10    7.00
  -6  -1  15  116.99    8.60
   6   1 -15   88.99   10.90
  -6  -1  14  134.59    9.10
   6   1 -14  105.59   11.60
   6   1 -14  117.29    9.40
  -6  -1  13  289.77   14.70
   6   1 -13  295.07   18.40
   6   1 -13  270.97   15.50
  -6  -1  12   53.19    5.50
   6   1 -12   55.09    8.40
   6   1 -12   48.30    6.00
  -6  -1  11    2.70    2.90
   6   1 -11    1.00    3.20
  -6  -1  10   16.20    3.40
   6   1 -10   18.80    4.90
   6   1 -10   13.20    5.20
   6   1 -10   20.60    4.20
  -6  -1   9  264.37   13.10
   6   1  -9  268.47   15.30
   6   1  -9  264.77   15.80
   6   1  -9  242.38   13.80
  -6  -1   8    2.50    2.70
   6   1  -8    2.10    4.20
   6   1  -8    0.90    2.90
  -6  -1   7  284.67   14.30
   6   1  -7  269.07   14.80
   6   1  -7  311.47   16.10
   6   1  -7  320.47   16.70
  -6  -1   6   57.89    5.20
   6   1  -6   60.99    6.30
   6   1  -6   47.70    6.40
   6   1  -6   46.20    5.40
  -6  -1   5   81.99    6.40
   6   1  -5   81.59    7.00
   6   1  -5   93.99    7.40
   6   1  -5   82.59    7.90
  -6  -1   4  370.36   17.10
   6   1  -4  379.36   18.60
   6   1  -4  378.76   17.80
   6   1  -4  323.67   17.50
  -6  -1   3  906.61   38.80
   6   1  -3  909.31   39.10
   6   1  -3  915.01   39.90
  -6  -1   2  179.68    9.80
  -6  -1   2  182.98   10.20
   6   1  -2  149.88   10.20
   6   1  -2  158.08    9.40
  -6  -1   1  441.16   21.70
  -6  -1   1  470.15   21.40
  -6  -1   1  486.75   21.70
   6   1  -1  456.35   20.80
  -6  -1   0   74.29    6.60
  -6  -1   0   59.89    6.00
   6   1   0   67.09    5.30
  -6  -1  -1    2.90    2.60
  -6  -1  -1    4.10    3.30
  -6  -1  -1   -0.40    3.00
   6   1   1    8.80    2.40
  -6  -1  -2   45.40    5.50
  -6  -1  -2   50.19    5.90
  -6  -1  -2   44.30    5.00
   6   1   2   48.30    4.40
  -6  -1  -3  179.08   10.20
  -6  -1  -3  205.88   13.40
  -6  -1  -3  177.98   11.40
   6   1   3  182.28    9.50
  -6  -1  -4   72.79    6.90
  -6  -1  -4   63.09    5.60
  -6  -1  -4   58.39    6.70
   6   1   4   51.99    4.80
  -6  -1  -5   33.40    5.40
  -6  -1  -5   37.70    6.10
   6   1   5   44.30    4.20
  -6  -1  -6   39.20    6.40
  -6  -1  -6   52.39    7.00
  -6  -1  -6   37.80    4.50
   6   1   6   42.60    4.20
  -6  -1  -7   29.90    4.10
   6   1   7   26.20    3.60
  -6  -1  -8   -0.60    2.60
  -6  -1  -8    2.70    4.70
   6   1   8   -2.70    2.10
  -6  -1  -9   55.29    5.80
  -6  -1  -9   62.99    8.40
   6   1   9   56.59    5.50
  -6  -1 -10    0.50    2.90
  -6  -1 -10    0.60    5.00
   6   1  10    3.30    2.70
  -6  -1 -11   15.10    6.40
  -6  -1 -11    8.20    3.60
   6   1  11    9.30    3.40
  -6  -1 -12    2.30    3.40
  -6  -1 -12    1.70    5.70
   6   1  12    2.20    3.00
  -6  -1 -13    1.60    3.40
  -6  -1 -13   -8.20    5.00
   6   1  13   -5.80    2.30
  -6  -1 -14   -6.50    6.20
  -6  -1 -14   -1.70    3.50
   6   1  14    3.60    3.30
  -7  -1  14   -3.70    3.70
   7   1 -14    0.20    5.60
  -7  -1  13  100.09    8.20
   7   1 -13   89.29    9.40
   7   1 -13   99.59   10.70
  -7  -1  12   37.60    4.90
   7   1 -12   21.30    4.70
   7   1 -12   52.19    8.70
  -7  -1  11   68.89    6.20
   7   1 -11   64.89    8.80
   7   1 -11   69.29    7.10
  -7  -1  10    4.10    3.20
   7   1 -10    4.30    3.20
   7   1 -10    1.10    4.90
  -7  -1   9    0.40    3.00
   7   1  -9   -1.50    4.30
  -7  -1   8    4.10    3.10
   7   1  -8    0.20    2.80
   7   1  -8    2.60    3.40
   7   1  -8    0.00    4.20
  -7  -1   7    5.10    3.20
   7   1  -7    3.00    3.20
   7   1  -7   -0.50    2.90
   7   1  -7    1.90    4.00
  -7  -1   6   12.20    3.50
   7   1  -6    6.10    4.30
   7   1  -6   10.70    3.80
   7   1  -6    3.10    3.30
  -7  -1   5   -0.70    2.80
   7   1  -5    5.30    3.90
   7   1  -5    4.10    3.20
   7   1  -5    6.20    3.30
  -7  -1   4   28.90    4.70
  -7  -1   4   32.40    4.50
   7   1  -4   30.50    5.30
   7   1  -4   28.30    4.40
  -7  -1   3  167.38   10.40
  -7  -1   3  163.08    9.90
   7   1  -3  157.78    9.60
   7   1  -3  153.18   10.60
  -7  -1   2   40.90    5.20
  -7  -1   2   51.59    6.80
   7   1  -2   40.50    4.80
   7   1  -2   64.19    6.50
  -7  -1   1  165.38   10.40
  -7  -1   1  172.98   10.80
   7   1  -1  164.58    9.30
   7   1  -1  162.68   10.40
  -7  -1   0    0.40    3.30
  -7  -1   0    1.40    3.20
   7   1   0   -0.70    3.10
   7   1   0   -0.60    2.20
  -7  -1  -1    1.00    3.60
  -7  -1  -1   -6.10    3.00
   7   1   1   -2.60    2.00
  -7  -1  -2   27.20    5.70
  -7  -1  -2   31.30    5.40
  -7  -1  -2   26.20    5.20
   7   1   2   33.20    3.70
  -7  -1  -3    1.70    3.90
   7   1   3    0.90    2.10
   7   1   4   13.00    2.80
  -7  -1  -5   17.30    5.50
   7   1   5   18.90    3.10
  -7  -1  -6   47.00    7.10
  -7  -1  -6   38.80    5.10
   7   1   6   36.80    4.00
  -7  -1  -7   19.60    3.60
  -7  -1  -7   23.70    6.10
   7   1   7   17.30    3.20
  -7  -1  -8   29.50    7.10
  -7  -1  -8   20.70    3.70
   7   1   8   25.00    3.50
  -7  -1  -9   12.20    6.10
  -7  -1  -9    4.30    3.00
   7   1   9    9.60    2.90
  -7  -1 -10   16.00    6.30
  -7  -1 -10   12.10    3.60
   7   1  10   10.40    3.00
  -8  -1   9    4.10    3.70
   8   1  -9    9.00    5.30
   8   1  -9    2.30    4.20
  -8  -1   8    1.00    3.50
   8   1  -8    5.20    3.30
   8   1  -8    0.60    5.10
  -8  -1   7    3.60    3.50
   8   1  -7   -4.50    4.30
   8   1  -7    2.00    3.40
   8   1  -7    3.40    3.10
  -8  -1   6   22.10    4.70
  -8  -1   6   17.90    4.40
   8   1  -6   20.70    5.50
   8   1  -6   14.30    4.20
  -8  -1   5   81.69    7.20
  -8  -1   5   83.49    7.80
   8   1  -5   82.39    8.40
   8   1  -5   79.79   10.80
  -8  -1   4   32.00    5.30
  -8  -1   4   33.10    5.00
   8   1  -4   24.50    4.30
   8   1  -4   27.40    5.20
  -8  -1   3   -2.00    3.50
   8   1  -3    8.20    3.20
   8   1  -3    3.70    3.70
  -8  -1   2   22.40    4.80
   8   1  -2   24.90    4.70
   8   1  -2   23.90    3.70
   8   1  -1   -1.50    2.30
   8   1  -1    5.80    3.30
  -8  -1   0   60.59    7.00
   8   1   0   70.19    6.40
   8   1   0   64.59    5.30
  -8  -1  -1   23.60    5.20
   8   1   1   25.00    3.30
  -8  -1  -2   23.20    5.30
   8   1   2   19.20    3.70
   8   1   2   26.20    3.70
  -8  -1  -3   21.40    5.60
   8   1   3   32.10    4.00
  -8  -1  -4   15.00    5.40
   8   1   4   14.60    2.70
  -8  -1  -5    6.60    5.30
  -9   2  -5   24.10    7.10
  -9   2  -4   -2.00    5.30
  -9   2  -3   53.29    8.00
  -9   2  -2    2.30    4.90
  -9   2  -1   13.50    5.40
  -9   2   0    2.40    4.70
  -9   2   1   25.70    5.80
  -9   2   2   29.00    6.20
  -9   2   3   31.80    6.10
   9  -2  -4    1.20    1.50
   9  -2  -4    3.70    1.60
  -9   2   4    3.50    4.50
   9  -2  -5   37.60    3.80
  -9   2   5   42.10    6.40
   9  -2  -6    4.10    2.80
  -9   2   6   -3.00    4.30
  -8   2 -10   18.90   11.90
  -8   2  -9   27.30    7.40
  -8   2  -8   -3.20    5.30
  -8   2  -7   34.10    7.20
  -8   2  -6   85.69   10.30
  -8   2  -5    5.70    5.50
  -8   2  -4   -4.40    4.20
  -8   2  -3   38.80    6.90
  -8   2  -2    7.30    4.50
  -8   2  -1   91.89    9.20
  -8   2   0    7.10    4.50
  -8   2   1    5.30    4.50
   8  -2  -2    0.90    1.00
  -8   2   2   -0.60    3.60
   8  -2  -3   32.60    3.00
   8  -2  -3   32.70    3.00
  -8   2   3   32.30    5.70
   8  -2  -4  363.26   15.90
   8  -2  -4  328.27   15.80
  -8   2   4  359.46   18.40
   8  -2  -5   68.49    5.70
  -8   2   5   61.39    7.10
   8  -2  -6  153.48    9.70
   8  -2  -6  174.88   10.00
  -8   2   6  167.58   11.20
   8  -2  -7   -0.40    2.90
   8  -2  -7   -1.00    3.10
  -8   2   7    8.30    4.30
   8  -2  -8  124.89    9.00
   8  -2  -8  114.29    8.70
  -8   2   8   78.49    8.10
   8  -2  -9   85.09    7.90
   8  -2  -9   78.59    8.10
  -8   2   9   79.89    8.10
   8  -2 -10   28.70    5.70
   8  -2 -10   37.20    6.20
  -8   2  10   32.90    5.60
   8  -2 -11   17.40    5.20
  -8   2  11   15.60    5.10
   8  -2 -12   56.59    7.80
  -8   2  12   53.39    7.10
  -7   2 -14    7.20    6.70
  -7   2 -14   15.10    2.70
  -7   2 -13    5.00    7.80
  -7   2 -13   10.30    2.10
  -7   2 -13   10.20    2.10
  -7   2 -12   20.90    7.20
  -7   2 -12   13.90    1.60
  -7   2 -12   15.30    1.70
  -7   2 -11    0.20    5.80
  -7   2 -10    1.70    5.60
  -7   2  -9   15.80    6.10
  -7   2  -8   53.99    8.00
  -7   2  -7   50.19    7.90
  -7   2  -6   36.70    7.10
  -7   2  -5  210.78   14.00
  -7   2  -4   41.70    7.30
  -7   2  -3  131.99   10.30
  -7   2  -2  117.09    9.60
   7  -2   1  153.48   11.00
  -7   2  -1  163.68   10.80
   7  -2   0    3.70    3.50
  -7   2   0    2.90    3.50
   7  -2  -1    9.30    1.20
   7  -2  -1   10.90    1.30
   7  -2  -1    9.90    4.20
  -7   2   1    4.10    3.50
   7  -2  -2   10.60    4.30
   7  -2  -2   19.40    2.40
   7  -2  -2   22.90    2.40
  -7   2   2   12.80    4.00
   7  -2  -3   81.99    5.40
   7  -2  -3   86.29    5.30
   7  -2  -3   95.29    8.50
  -7   2   3   79.29    7.40
   7  -2  -4   11.40    2.80
   7  -2  -4    8.00    3.70
   7  -2  -4   15.40    3.00
  -7   2   4   12.70    4.10
   7  -2  -5  127.29    7.90
   7  -2  -5  105.69    9.30
  -7   2   5  115.49    8.70
   7  -2  -6   33.90    4.50
   7  -2  -6   31.80    4.60
   7  -2  -6   21.20    5.00
  -7   2   6   32.50    5.00
   7  -2  -7   58.29    6.10
   7  -2  -7   35.60    5.10
  -7   2   7   44.00    5.60
   7  -2  -8  128.59    9.60
   7  -2  -8  141.29    9.70
  -7   2   8  130.09   10.50
   7  -2  -9  233.88   15.60
   7  -2  -9  198.48   12.90
  -7   2   9  216.88   12.80
   7  -2 -10   -1.30    3.80
   7  -2 -10   -3.50    3.00
  -7   2  10   -2.20    3.40
   7  -2 -11   -0.70    4.30
  -7   2  11    3.50    4.00
   7  -2 -12    1.10    4.60
  -7   2  12   10.10    4.30
   7  -2 -13   14.70    5.50
  -7   2  13    1.50    4.10
   7  -2 -14   12.10    5.80
  -7   2  14   11.80    4.70
   7  -2 -15    7.00    5.80
  -7   2  15   11.80    5.10
  -6   2 -16    4.50    3.30
  -6   2 -16    0.80    2.70
  -6   2 -16   -5.70    5.30
  -6   2 -15    1.60    3.10
  -6   2 -15   -2.90    2.30
  -6   2 -15   -4.40    5.50
  -6   2 -14    9.30    3.10
  -6   2 -14    1.40    5.30
  -6   2 -14    8.60    3.00
  -6   2 -13   38.60    4.40
  -6   2 -13   18.00    6.40
  -6   2 -12   20.20    3.30
  -6   2 -12   19.60    3.00
  -6   2 -12   16.20    6.20
  -6   2 -11   18.30    2.90
  -6   2 -11   18.00    2.70
  -6   2 -11   11.40    5.50
  -6   2 -10    1.30    1.80
  -6   2 -10   -1.00    1.50
  -6   2 -10    9.10    5.10
  -6   2  -9   56.99    3.50
  -6   2  -9   54.79    3.30
  -6   2  -9   58.29    7.60
  -6   2  -8   54.19   11.60
  -6   2  -7    3.80    4.20
  -6   2  -6    0.00    3.40
  -6   2  -6   -2.50    3.80
  -6   2  -5  343.17   18.20
  -6   2  -5  337.07   17.60
  -6   2  -4  299.87   16.60
  -6   2  -4  321.77   16.40
  -6   2  -3 1159.88   51.09
  -6   2  -3 1208.58   51.09
   6  -2   2  165.58   10.90
  -6   2  -2  173.18   10.80
   6  -2   1  109.29    8.50
  -6   2  -1  124.19    8.70
   6  -2   0   20.00    4.20
  -6   2   0   19.10    4.00
   6  -2  -1  233.48   10.30
   6  -2  -1  227.98   10.30
   6  -2  -1  248.68   13.30
  -6   2   1  253.97   13.00
   6  -2  -2    9.00    2.00
   6  -2  -2   10.50    3.50
   6  -2  -2    6.40    1.80
  -6   2   2   11.20    3.50
   6  -2  -3  902.61   36.10
   6  -2  -3  842.72   37.80
   6  -2  -3  837.12   35.80
  -6   2   3  832.82   37.00
   6  -2  -4  251.17   11.80
   6  -2  -4  211.98   11.30
   6  -2  -4  214.58   12.90
  -6   2   4  241.88   12.50
   6  -2  -5    2.50    2.60
   6  -2  -5    3.10    3.10
   6  -2  -5    5.60    2.60
  -6   2   5    4.00    3.00
   6  -2  -6  160.78    9.30
   6  -2  -6  117.39    8.40
   6  -2  -6  163.78   15.10
  -6   2   6  132.69    8.80
   6  -2  -7  815.82   34.80
   6  -2  -7  789.02   34.40
   6  -2  -7  739.63   35.00
  -6   2   7  775.42   34.30
   6  -2  -8  108.49    8.50
   6  -2  -8  105.39    8.50
   6  -2  -8  127.69    9.40
  -6   2   8  122.39    8.30
   6  -2  -9  635.24   29.30
   6  -2  -9  618.34   29.30
   6  -2  -9  623.64   29.50
  -6   2   9  651.03   28.70
   6  -2 -10  203.58   12.90
   6  -2 -10  212.48   13.10
   6  -2 -10  207.58   12.80
  -6   2  10  202.18   12.00
   6  -2 -11   26.70    5.70
   6  -2 -11   35.90    5.90
  -6   2  11   26.30    4.90
   6  -2 -12   21.40    5.70
  -6   2  12   14.20    4.40
   6  -2 -13   48.50    7.30
  -6   2  13   57.99    6.40
   6  -2 -14    9.80    5.50
  -6   2  14   16.60    4.70
   6  -2 -15   66.99    9.30
  -6   2  15   55.49    7.30
   6  -2 -16    1.60    5.50
  -6   2  16    3.50    4.60
   6  -2 -17    3.50    5.90
  -6   2  17    6.10    4.90
  -5   2 -18    9.80    4.70
  -5   2 -18   -3.60    5.50
  -5   2 -17   13.70    4.60
  -5   2 -17   12.30    6.30
  -5   2 -16   -3.90    3.20
  -5   2 -16   -3.60    4.90
  -5   2 -15    8.50    5.50
  -5   2 -15    7.00    3.50
  -5   2 -14    1.70    3.00
  -5   2 -14    4.10    5.20
  -5   2 -13    7.70    3.20
  -5   2 -13    8.40    5.50
  -5   2 -12  168.88    9.80
  -5   2 -12  164.68   13.00
  -5   2 -11    3.70    4.30
  -5   2 -11    1.20    2.20
  -5   2 -10  206.98   10.30
  -5   2 -10  216.58   14.10
  -5   2  -9   13.40    4.30
  -5   2  -9   16.80    2.40
  -5   2  -9   12.20    4.60
  -5   2  -8   23.10    5.40
  -5   2  -8   27.90    2.60
  -5   2  -8   32.10    5.20
  -5   2  -7    1.10    1.20
  -5   2  -7   -0.90    3.30
  -5   2  -7    1.80    1.00
  -5   2  -6   14.40    3.50
  -5   2  -6   16.20    4.50
  -5   2  -5   -2.70    2.30
  -5   2  -5    3.30    3.10
  -5   2  -4  100.89    7.30
  -5   2  -4  108.19    8.00
   5  -2   3  110.29    7.90
  -5   2  -3  110.89    7.90
   5  -2   2  602.14   28.00
  -5   2  -2  645.84   28.10
   5  -2   1   63.19    6.00
  -5   2  -1   57.99    5.70
   5  -2   0  596.84   24.60
   5  -2   0  595.84   24.60
   5  -2   0  601.04   27.20
  -5   2   0  651.23   27.20
   5  -2  -1   31.70    2.50
   5  -2  -1   44.50    5.00
   5  -2  -1   37.10    2.70
  -5   2   1   39.80    4.40
   5  -2  -2   60.39    3.90
   5  -2  -2   64.19    5.90
   5  -2  -2   58.59    4.10
  -5   2   2   55.29    5.20
   5  -2  -3   25.90    4.00
   5  -2  -3   35.60    3.60
   5  -2  -3   35.70    3.40
  -5   2   3   34.60    4.20
   5  -2  -4    0.60    1.80
   5  -2  -4    1.80    2.30
   5  -2  -4   -0.70    1.90
  -5   2   4    1.30    2.40
   5  -2  -5    1.50    2.40
   5  -2  -5    4.00    2.30
   5  -2  -5   -0.90    2.40
  -5   2   5    1.30    2.20
   5  -2  -6  130.79    8.10
   5  -2  -6  111.99    7.70
   5  -2  -6  127.69    8.30
  -5   2   6  119.29    7.70
   5  -2  -7   52.69    5.60
   5  -2  -7   68.49    6.40
  -5   2   7   57.69    5.60
   5  -2  -8  265.77   14.00
   5  -2  -8  279.47   14.20
  -5   2   8  246.98   14.60
  -5   2   8  248.28   13.30
   5  -2  -9    9.00    3.60
   5  -2  -9    7.80    3.60
  -5   2   9    5.60    4.00
  -5   2   9    9.30    3.00
   5  -2 -10  244.48   13.70
   5  -2 -10  244.48   14.10
  -5   2  10  230.08   12.80
  -5   2  10  248.88   14.80
   5  -2 -11   22.90    5.40
   5  -2 -11   27.00    5.10
  -5   2  11   24.10    4.60
  -5   2  11   26.00    5.40
   5  -2 -12   54.09    6.20
   5  -2 -12   46.30    6.60
  -5   2  12   50.89    7.30
  -5   2  12   39.80    5.20
   5  -2 -13   -0.40    4.50
  -5   2  13   -0.60    3.80
   5  -2 -14   -0.20    4.70
  -5   2  14    3.40    3.80
   5  -2 -15   12.00    5.70
  -5   2  15   18.70    4.90
   5  -2 -16    3.70    5.60
  -5   2  16    3.60    4.50
   5  -2 -17   -3.70    5.30
  -5   2  17   -2.20    4.30
   5  -2 -18   13.80    6.60
  -5   2  18    9.60    4.90
   5  -2 -19    6.60    6.90
  -5   2  19    1.80    4.80
  -4   2 -20    7.70    5.60
  -4   2 -19   -0.80    4.60
  -4   2 -18   -0.30    5.20
  -4   2 -17   28.80    6.20
   4  -2  16    8.00    3.70
  -4   2 -16    5.50    4.50
   4  -2  15   23.10    4.50
  -4   2 -15   23.50    5.10
   4  -2  14    9.20    3.50
  -4   2 -14    3.20    3.50
   4  -2  13  120.59    8.40
  -4   2 -13  115.09    8.60
   4  -2  12   14.00    3.30
  -4   2 -12    2.70    1.50
  -4   2 -12    7.30    3.20
  -4   2 -12    4.20    4.20
   4  -2  11  876.11   36.40
  -4   2 -11  811.62   38.40
  -4   2 -11  868.01   37.40
  -4   2 -11  809.02   37.30
   4  -2  10   85.29    6.10
  -4   2 -10   75.69    8.00
  -4   2 -10   81.59    7.10
  -4   2 -10   92.69    6.20
   4  -2   9  161.08    8.60
  -4   2  -9  154.28    9.80
  -4   2  -9  163.98   11.00
  -4   2  -9  162.48    8.50
   4  -2   8   50.39    3.90
  -4   2  -8   31.60    5.10
  -4   2  -8   41.60    3.60
  -4   2  -8   41.00    5.00
  -4   2  -7 1146.29   48.50
  -4   2  -7 1099.29   45.80
  -4   2  -7 1119.99   47.60
  -4   2  -6  131.89    6.00
  -4   2  -6  124.59    6.20
  -4   2  -6  128.59    8.00
  -4   2  -6  131.59    8.70
  -4   2  -5  804.02   34.30
  -4   2  -5  797.32   32.20
  -4   2  -5  780.32   32.10
  -4   2  -5  806.62   34.90
  -4   2  -4   58.09    5.10
  -4   2  -4   70.99    5.90
   4  -2   3    9.90    2.70
  -4   2  -3   14.00    3.20
   4  -2   2    8.10    2.60
  -4   2  -2    7.60    2.60
   4  -2   1 5962.50  267.37
  -4   2  -1 6119.19  267.67
   4  -2   0  722.23   28.60
   4  -2   0  679.23   30.40
   4  -2   0  724.13   28.50
  -4   2   0  678.33   30.30
   4  -2  -1 5559.34  242.48
   4  -2  -1 5994.50  245.38
   4  -2  -1 5810.32  257.17
  -4   2   1 5853.91  255.57
   4  -2  -2    8.60    2.50
   4  -2  -2    5.10    1.40
  -4   2   2    8.50    2.40
   4  -2  -3   17.80    2.40
   4  -2  -3   20.10    3.20
  -4   2   3   14.20    2.80
  -4   2   3   17.60    2.70
   4  -2  -4   61.79    5.20
   4  -2  -4   64.49    4.70
  -4   2   4   65.89    5.20
  -4   2   4   62.49    4.80
   4  -2  -5  803.82   33.60
   4  -2  -5  773.12   33.30
  -4   2   5  707.13   33.60
  -4   2   5  829.52   33.30
   4  -2  -6  140.49    8.40
   4  -2  -6  135.69    8.30
  -4   2   6  142.09    8.80
  -4   2   6  143.89    8.10
   4  -2  -7 1130.49   47.20
   4  -2  -7 1076.39   47.30
  -4   2   7 1118.09   46.80
  -4   2   7 1132.09   47.90
   4  -2  -8   39.00    4.60
   4  -2  -8   51.69    5.50
  -4   2   8   46.20    5.60
  -4   2   8   29.90    3.90
   4  -2  -9  175.48   10.30
   4  -2  -9  172.98   10.70
  -4   2   9  167.48   11.00
  -4   2   9  169.58    9.60
   4  -2 -10  101.29    8.20
   4  -2 -10   91.19    7.40
  -4   2  10  103.69    8.50
  -4   2  10   76.39    6.60
   4  -2 -11  852.51   39.10
   4  -2 -11  881.61   43.60
  -4   2  11  878.81   37.80
  -4   2  11  870.51   39.60
   4  -2 -12   18.70    4.90
   4  -2 -12   10.50    3.90
  -4   2  12   21.10    5.20
  -4   2  12    7.40    3.50
   4  -2 -13  112.49    9.30
   4  -2 -13  123.69   10.40
  -4   2  13  119.49    8.80
  -4   2  13  120.49   10.50
   4  -2 -14    7.20    4.90
  -4   2  14    6.50    3.90
   4  -2 -15   10.90    5.50
  -4   2  15   17.90    4.60
   4  -2 -16    1.10    5.20
  -4   2  16    4.60    4.10
   4  -2 -17   24.00    7.30
  -4   2  17   24.40    5.60
   4  -2 -18   -5.80    5.70
  -4   2  18    2.00    4.40
   4  -2 -19   -3.40    5.90
  -4   2  19    1.90    4.60
   4  -2 -20   -1.80    6.40
  -4   2  20   -4.50    5.10
   3  -2  21   -1.60    5.00
  -3   2 -21    1.80    6.00
   3  -2  20    0.60    5.20
  -3   2 -20    0.90    5.40
   3  -2  19   52.39    8.00
  -3   2 -19   56.39    8.70
   3  -2  18    9.80    5.20
  -3   2 -18    7.70    5.40
   3  -2  17   -0.80    4.00
   3  -2  17   -0.20    3.40
  -3   2 -17   12.60    5.60
   3  -2  16    1.60    3.90
   3  -2  16   -0.90    3.30
  -3   2 -16    3.10    4.30
   3  -2  15   17.80    5.00
   3  -2  15   19.20    4.50
  -3   2 -15   20.50    5.00
   3  -2  14   10.10    4.20
   3  -2  14    2.30    3.20
  -3   2 -14    1.20    3.60
   3  -2  13   15.50    3.90
   3  -2  13   18.40    4.70
  -3   2 -13   25.40    4.50
  -3   2 -13   17.90    4.20
   3  -2  12   84.59    6.80
  -3   2 -12   78.59    7.10
  -3   2 -12   79.69    7.30
   3  -2  11   90.29    7.70
   3  -2  11   80.69    6.30
  -3   2 -11   66.69    6.30
  -3   2 -11   82.99    6.90
   3  -2  10  181.08   11.20
   3  -2  10  210.78   10.70
  -3   2 -10  190.58   11.00
  -3   2 -10  200.68   10.80
   3  -2   9  398.06   18.40
  -3   2  -9  391.36   18.90
  -3   2  -9  420.66   18.60
   3  -2   8  912.91   37.70
  -3   2  -8  885.41   37.60
  -3   2  -8  876.31   39.10
  -3   2  -8  900.91   38.40
  -3   2  -7   59.79    5.00
  -3   2  -7   47.20    5.10
  -3   2  -7   63.49    4.30
  -3   2  -6   78.79    4.60
  -3   2  -6   81.69    4.70
  -3   2  -6   73.79    5.40
  -3   2  -6   77.49    6.10
  -3   2  -5   19.90    1.90
  -3   2  -5   14.00    1.70
  -3   2  -5   17.20    2.70
  -3   2  -4  144.79    6.20
  -3   2  -4  137.39    6.20
  -3   2  -4  140.79    7.60
  -3   2  -4  142.69    8.00
   3  -2   3   68.79    4.80
  -3   2  -3   59.49    4.70
   3  -2   2    0.60    1.50
  -3   2  -2   -0.10    1.60
   3  -2   1    9.40    0.90
   3  -2   1   12.50    2.30
  -3   2  -1   11.10    2.10
   3  -2   0  439.86   18.30
   3  -2   0  451.25   19.60
  -3   2   0  452.45   19.60
  -3   2   0  446.46   18.50
   3  -2  -1  610.04   26.60
   3  -2  -1  623.44   25.70
  -3   2   1  609.04   26.50
  -3   2   1  651.93   26.00
   3  -2  -2 1637.04   76.29
   3  -2  -2 1524.35   79.59
  -3   2   2 1419.26   78.39
  -3   2   2 1533.35   78.09
   3  -2  -3   29.00    2.80
   3  -2  -3   29.20    3.10
  -3   2   3   41.60    3.50
  -3   2   3   23.70    2.70
   3  -2  -4   19.70    3.10
   3  -2  -4   18.70    2.50
  -3   2   4   22.40    2.70
  -3   2   4   18.80    2.70
   3  -2  -5   31.60    3.50
   3  -2  -5   26.40    3.30
  -3   2   5   23.90    2.90
  -3   2   5   33.20    3.80
   3  -2  -6   19.80    3.10
   3  -2  -6   15.50    3.00
  -3   2   6   11.20    3.20
  -3   2   6   12.10    2.40
   3  -2  -7   -1.20    1.90
   3  -2  -7   -1.00    2.00
  -3   2   7   -0.50    1.90
  -3   2   7    0.80    2.30
   3  -2  -8   14.40    3.20
   3  -2  -8   15.40    3.40
  -3   2   8   15.10    3.00
  -3   2   8   20.10    3.90
   3  -2  -9   27.50    4.50
   3  -2  -9   38.70    4.60
  -3   2   9   27.90    3.80
  -3   2   9   50.39    5.80
   3  -2 -10  190.48   10.50
   3  -2 -10  158.88   10.90
  -3   2  10  180.78   10.10
  -3   2  10  186.58   11.40
   3  -2 -11   57.89    6.20
   3  -2 -11   65.29    7.00
  -3   2  11   65.79    6.00
  -3   2  11   63.39    6.90
   3  -2 -12  276.97   16.30
  -3   2  12  307.57   15.30
  -3   2  12  305.27   16.80
   3  -2 -13   62.09    7.00
   3  -2 -13   40.20    6.60
  -3   2  13   51.59    6.00
  -3   2  13   54.69    7.10
   3  -2 -14    8.80    4.70
   3  -2 -14   -3.70    3.50
  -3   2  14    4.30    3.70
   3  -2 -15    3.10    4.70
  -3   2  15    3.80    4.40
   3  -2 -16   -2.90    4.70
  -3   2  16    1.80    4.10
   3  -2 -17   18.00    6.40
  -3   2  17   15.50    5.10
   3  -2 -18   31.00    7.60
  -3   2  18   34.10    6.70
   3  -2 -19    8.20    6.80
  -3   2  19   13.50    5.40
   3  -2 -20   -2.50    7.10
  -3   2  20   -5.40    4.90
   2  -2  22   10.60    5.80
  -2   2 -22   11.30    7.30
   2  -2  21   18.10    6.30
  -2   2 -21   18.20    7.50
   2  -2  20   -1.00    5.10
  -2   2 -20   14.00    6.50
   2  -2  19   19.70    5.70
  -2   2 -19   22.50    7.00
   2  -2  18   64.29    8.10
  -2   2 -18   69.19    9.40
   2  -2  17   12.90    4.90
  -2   2 -17   10.70    5.30
   2  -2  16    1.90    5.40
   2  -2  16    4.50    4.10
  -2   2 -16    4.40    4.40
   2  -2  15  100.39    8.80
  -2   2 -15   93.49    9.40
  -2   2 -15   89.39    8.60
   2  -2  14  615.94   28.30
   2  -2  14  582.24   27.90
  -2   2 -14  594.14   28.00
  -2   2 -14  611.04   28.80
   2  -2  13  105.69    8.40
   2  -2  13  118.69    8.60
  -2   2 -13  122.39    8.50
  -2   2 -13  100.59    8.80
   2  -2  12   11.50    3.60
   2  -2  12   10.00    3.40
  -2   2 -12   11.50    3.30
  -2   2 -12   11.70    3.70
   2  -2  11  250.97   13.50
   2  -2  11  253.27   13.60
  -2   2 -11  281.57   14.10
  -2   2 -11  251.27   13.40
   2  -2  10  446.16   19.80
   2  -2  10  426.76   19.70
  -2   2 -10  382.16   19.30
   2  -2   9 1346.17   56.59
   2  -2   9 1363.46   56.59
  -2   2  -9 1364.36   56.49
  -2   2  -9 1336.57   56.69
   2  -2   8 5126.59  235.78
  -2   2  -8 5225.38  235.18
  -2   2  -8 5437.46  244.38
   2  -2   7 2419.16  121.39
  -2   2  -7 2460.45  120.99
  -2   2  -7 2563.64  127.49
  -2   2  -6  498.85   21.10
  -2   2  -6  463.75   21.20
  -2   2  -6  498.05   21.20
  -2   2  -5  142.39    6.90
  -2   2  -5  139.39    7.70
  -2   2  -5  130.49    7.00
  -2   2  -5  146.69    7.30
  -2   2  -4 1639.94   84.49
  -2   2  -4 1659.63   80.09
  -2   2  -4 1619.54   77.89
  -2   2  -4 1614.34   80.59
   2  -2   3 3690.93  165.48
  -2   2  -3 3813.62  167.48
  -2   2  -3 3748.82  158.78
   2  -2   2 3615.14  150.38
   2  -2   2 3523.75  157.58
  -2   2  -2 3637.24  149.59
  -2   2  -2 3535.65  158.28
   2  -2   1  599.54   25.20
  -2   2  -1  596.74   25.20
  -2   2  -1  598.64   24.30
   2  -2   0 1047.10   54.99
   2  -2   0 1102.49   50.29
  -2   2   0 1021.20   54.19
  -2   2   0 1022.50   50.19
   2  -2  -1  220.98    9.90
   2  -2  -1  243.38   10.40
  -2   2   1  227.18   10.00
  -2   2   1  224.38   10.30
   2  -2  -2 6555.34  281.67
   2  -2  -2 6750.72  281.87
  -2   2   2 6406.86  282.77
  -2   2   2 7075.39  281.97
   2  -2  -3 5160.58  221.58
   2  -2  -3 4804.72  217.18
  -2   2   3 5420.46  224.18
  -2   2   3 4912.81  216.88
   2  -2  -4 2632.74  125.29
   2  -2  -4 2449.16  119.19
  -2   2   4 2982.60  129.99
  -2   2   4 2297.67  116.79
   2  -2  -5  343.47   15.00
   2  -2  -5  332.17   15.30
  -2   2   5  324.27   14.80
  -2   2   5  328.67   15.30
   2  -2  -6  271.17   13.10
   2  -2  -6  280.17   13.50
  -2   2   6  296.87   13.80
  -2   2   6  277.17   13.00
   2  -2  -7   54.89    4.50
  -2   2   7   62.29    5.60
  -2   2   7   53.29    4.40
   2  -2  -8   64.89    5.60
   2  -2  -8   64.19    5.30
  -2   2   8   59.79    5.00
  -2   2   8   72.09    5.90
   2  -2  -9  127.69    7.60
   2  -2  -9  107.59    7.90
  -2   2   9  120.99    7.40
  -2   2   9  113.79    8.20
   2  -2 -10  327.67   17.80
   2  -2 -10  356.46   17.40
  -2   2  10  392.86   18.40
  -2   2  10  363.16   17.10
   2  -2 -11    4.70    3.10
   2  -2 -11    1.50    3.20
  -2   2  11    8.60    3.20
  -2   2  11    6.70    3.60
   2  -2 -12   74.19    7.60
   2  -2 -12   75.09    7.30
  -2   2  12   82.79    6.90
  -2   2  12   80.89    8.00
   2  -2 -13  134.29    9.40
   2  -2 -13  114.19    9.80
  -2   2  13  130.39    8.90
  -2   2  13  128.89    9.90
   2  -2 -14   12.90    4.60
   2  -2 -14   20.10    5.60
  -2   2  14   17.90    4.90
  -2   2  14   10.20    3.80
   2  -2 -15    2.30    4.60
  -2   2  15   -5.10    5.10
   2  -2 -16   16.70    6.10
  -2   2  16   24.00    5.70
   2  -2 -17   14.90    6.30
  -2   2  17   10.50    4.70
   2  -2 -18    1.40    5.50
  -2   2  18    2.80    4.60
   2  -2 -19    1.80    5.90
  -2   2  19   -2.90    4.90
   2  -2 -20   10.30    6.80
  -2   2  20    4.80    5.60
   2  -2 -21    3.30    6.80
  -2   2  21   -6.20    5.10
   1  -2  22    3.70    5.10
  -1   2 -22    4.90    6.50
   1  -2  21   -3.60    4.60
  -1   2 -21    8.20    6.90
   1  -2  20   10.90    5.10
  -1   2 -20   17.70    6.80
   1  -2  19   15.10    5.10
  -1   2 -19   14.40    6.70
   1  -2  18    3.60    4.10
  -1   2 -18   -9.70    4.30
   1  -2  16   14.10    4.70
  -1   2 -16   19.90    5.40
  -1   2 -16   16.30    4.50
   1  -2  15   53.49    6.30
  -1   2 -15   53.99    7.30
  -1   2 -15   84.09    7.60
   1  -2  14   47.80    5.70
   1  -2  14   52.79    6.80
  -1   2 -14   43.90    6.40
  -1   2 -14   42.00    5.40
   1  -2  13  115.59    8.90
   1  -2  13  115.59    8.10
  -1   2 -13  115.09    8.10
  -1   2 -13   96.79    8.80
   1  -2  12   15.60    3.80
   1  -2  12   12.60    3.40
  -1   2 -12   11.00    3.90
  -1   2 -12   17.30    3.80
   1  -2  11   73.89    6.20
   1  -2  11   92.19    7.10
  -1   2 -11   75.19    6.20
  -1   2 -11   84.19    7.70
   1  -2  10  153.18    8.90
  -1   2 -10  154.98    8.80
  -1   2 -10  164.38    9.90
   1  -2   9   72.89    5.60
  -1   2  -9   77.39    5.50
  -1   2  -9   86.49    6.40
   1  -2   8  180.08    9.30
  -1   2  -8  183.68    9.90
  -1   2  -8  187.68    9.40
  -1   2  -8  180.88   10.00
  -1   2  -7 1210.28   50.49
   1  -2   6  167.08    8.20
  -1   2  -6  167.08    8.80
  -1   2  -6  158.78    8.50
  -1   2  -6  175.18    8.20
   1  -2   5  445.66   18.90
  -1   2  -5  439.16   19.20
  -1   2  -5  426.76   19.40
  -1   2  -5  455.25   19.00
   1  -2   4    6.70    1.50
  -1   2  -4   10.30    1.70
  -1   2  -4    9.00    1.50
  -1   2  -4   10.00    1.70
   1  -2   3 1190.48   62.29
   1  -2   3 1224.08   59.59
  -1   2  -3 1228.58   62.39
  -1   2  -3 1250.67   60.19
   1  -2   2    2.90    0.90
   1  -2   2    0.60    0.80
  -1   2  -2    2.20    0.90
  -1   2  -2    0.60    0.80
   1  -2   1 1339.27   58.69
   1  -2   1 1170.68   59.29
  -1   2  -1 1225.38   59.79
  -1   2  -1 1256.87   58.49
   1  -2   0  200.38    8.90
   1  -2   0  203.68    9.00
  -1   2   0  206.28    8.90
  -1   2   0  208.08    9.00
   1  -2  -1   43.00    2.80
   1  -2  -1   55.49    3.10
  -1   2   1   49.99    2.90
  -1   2   1   51.99    3.00
   1  -2  -2  154.78    7.30
   1  -2  -2  164.68    7.60
  -1   2   2  161.28    7.40
   1  -2  -3 3168.78  138.49
  -1   2   3 3126.49  138.69
  -1   2   3 3166.28  144.49
   1  -2  -4  548.15   25.80
   1  -2  -4  635.04   25.80
  -1   2   4  621.04   25.70
  -1   2   4  639.84   26.00
   1  -2  -5  219.48   10.10
   1  -2  -5  191.48    9.60
  -1   2   5  203.18    9.90
  -1   2   5  189.28    9.60
   1  -2  -6    2.60    1.70
   1  -2  -6    2.90    1.80
  -1   2   6    1.90    1.60
  -1   2   6    5.30    2.20
   1  -2  -7   25.10    3.50
   1  -2  -7   33.10    3.50
  -1   2   7   32.60    4.00
  -1   2   7   27.30    3.70
   1  -2  -8   77.49    6.00
   1  -2  -8   78.99    5.60
  -1   2   8   69.69    5.80
  -1   2   8   73.09    5.50
   1  -2  -9  181.48    9.70
   1  -2  -9  167.18   10.10
  -1   2   9  182.98    9.70
  -1   2   9  157.48    9.90
   1  -2 -10   14.30    3.20
   1  -2 -10   13.70    3.80
  -1   2  10   16.70    3.40
  -1   2  10   15.90    3.60
   1  -2 -11    7.10    3.00
   1  -2 -11   12.20    3.80
  -1   2  11    0.50    2.70
  -1   2  11    5.00    3.10
   1  -2 -12    7.60    3.70
   1  -2 -12    0.50    2.80
  -1   2  12    3.40    3.30
  -1   2  12    2.60    3.10
   1  -2 -13  212.38   12.90
   1  -2 -13  244.18   14.20
  -1   2  13  214.28   13.00
  -1   2  13  233.88   13.80
   1  -2 -14  125.99    9.50
   1  -2 -14  136.39   10.80
  -1   2  14  126.19    9.50
  -1   2  14  118.39    9.90
   1  -2 -16   37.30    6.90
  -1   2  16   40.20    6.50
   1  -2 -17    9.40    6.00
  -1   2  17    6.50    4.90
   1  -2 -18    2.20    5.40
  -1   2  18    9.80    4.80
   1  -2 -19   -6.80    5.60
  -1   2  19   -0.30    5.00
   1  -2 -20    3.50    6.90
  -1   2  20   -1.10    5.20
   1  -2 -21   -3.50    6.50
  -1   2  21   -7.70    5.40
   0  -2  22   37.30    6.80
   0   2 -22   21.10   12.80
   0  -2  21   -7.80    4.20
   0   2 -21   -5.70    6.10
   0  -2  20    4.20    4.60
   0   2 -20   -3.50    6.00
   0  -2  19    1.70    4.20
   0   2 -19   -3.00    5.20
   0  -2  18  152.98   11.20
   0   2 -18  168.28   13.70
   0  -2  17    1.60    3.70
   0   2 -17    0.50    3.50
   0   2 -17   -3.90    4.60
   0  -2  16  712.03   32.60
   0   2 -16  708.23   32.90
   0   2 -16  761.02   35.20
   0  -2  15    1.60    3.00
   0   2 -15    4.00    4.10
   0   2 -15   -1.40    3.40
   0   2 -15    3.30    3.40
   0  -2  14  139.29    9.00
   0   2 -14  145.69   10.90
   0   2 -14  136.09    9.20
   0  -2  13   -2.40    2.40
   0   2 -13   -0.50    2.90
   0   2 -13   -2.30    3.10
   0   2 -13    1.40    2.70
   0  -2  12 1367.26   57.09
   0   2 -12 1355.26   58.99
   0   2 -12 1382.16   57.29
   0   2 -12 1359.26   58.69
   0  -2  11    1.20    2.10
   0   2 -11    2.10    2.90
   0   2 -11   -0.70    2.20
   0   2 -11   -2.00    2.50
   0  -2  10 1074.79   46.00
   0   2 -10 1106.79   46.20
   0   2 -10 1129.09   47.80
   0   2 -10 1102.09   47.40
   0  -2   9    1.60    1.70
   0   2  -9   -0.30    1.70
   0   2  -9    0.60    2.20
   0   2  -9    1.60    2.20
   0  -2   8   85.99    5.30
   0   2  -8   89.99    5.40
   0   2  -8   96.99    6.40
   0   2  -8   75.99    6.30
   0  -2   7   -1.20    1.10
   0   2  -7   -2.10    1.50
   0   2  -7   -1.10    1.20
   0   2  -7   -2.90    1.70
   0  -2   6 9003.00  370.76
   0   2  -6 8928.31  392.06
   0   2  -6 8953.50  387.36
   0   2  -6 8968.90  371.36
   0  -2   5   -0.10    1.50
   0  -2   5    4.90    1.10
   0   2  -5   -0.50    0.90
   0   2  -5    0.20    1.40
   0  -2   4 9672.53  392.96
   0  -2   4 9357.66  407.36
   0   2  -4 9606.74  408.26
   0   2  -4 9999.00  393.66
   0  -2   3    0.30    1.10
   0   2  -3    0.30    1.10
   0   2  -3    0.00    0.50
   0   2  -3    0.50    0.60
   0  -2   2  115.99    5.00
   0  -2   2  116.89    5.80
   0   2  -2  114.49    5.90
   0   2  -2  118.89    5.00
   0  -2   1   -0.20    0.80
   0  -2   1    0.70    0.40
   0   2  -1    1.50    1.00
   0   2  -1    0.70    0.40
   0  -2   0  593.34   30.10
   0  -2   0  619.34   37.80
   0   2   0  641.74   30.90
   0   2   0  727.23   39.40
   0  -2  -1    2.00    1.00
   0  -2  -1    0.40    0.70
   0   2   1   -0.80    0.80
   0   2   1    0.70    0.80
   0  -2  -2 1589.44   72.49
   0  -2  -2 1519.75   78.99
   0   2   2 1660.63   73.79
   0   2   2 1529.85   78.39
   0  -2  -3    0.00    1.00
   0  -2  -3    0.40    1.10
   0   2   3    0.40    1.10
   0   2   3    0.20    1.10
   0  -2  -4   84.89    5.10
   0  -2  -4   83.59    4.80
   0   2   4   84.49    5.00
   0   2   4   86.09    5.00
   0  -2  -5   -0.10    1.50
   0  -2  -5   -0.80    1.50
   0   2   5   -0.10    1.50
   0   2   5    0.50    1.50
   0  -2  -6 1511.75   81.29
   0  -2  -6 1727.83   91.19
   0   2   6 1411.46   94.09
   0   2   6 1517.35   82.39
   0  -2  -7    1.00    1.80
   0   2   7   -0.40    1.80
   0  -2  -8  149.59    8.90
   0  -2  -8  164.98    9.50
   0   2   8  154.98    9.10
   0   2   8  178.48    9.40
   0  -2  -9    0.90    2.20
   0  -2  -9   -0.40    2.30
   0   2   9    0.70    2.50
   0   2   9    3.20    2.50
   0  -2 -10  284.67   15.60
   0  -2 -10  316.67   15.30
   0   2  10  303.37   15.50
   0   2  10  303.07   15.20
   0  -2 -11    1.80    3.20
   0  -2 -11    1.70    2.80
   0   2  11    1.60    2.80
   0   2  11    4.20    3.20
   0  -2 -12    2.50    3.70
   0  -2 -12    2.80    3.50
   0   2  12    1.80    3.10
   0   2  12   -2.90    3.00
   0  -2 -13   -1.10    3.70
   0  -2 -13    0.00    3.10
   0   2  13   -1.90    3.30
   0   2  13    0.40    3.20
   0  -2 -14    1.60    1.80
   0  -2 -14   10.40    4.80
   0   2  14    5.10    3.90
   0   2  14    4.40    3.80
   0   2  15   -0.70    3.90
   0  -2 -16   -1.60    4.50
   0   2  16   -2.00    4.10
   0  -2 -17   -1.10    5.00
   0   2  17    0.40    4.50
   0  -2 -18    3.40    6.00
   0   2  18    2.30    5.20
   0  -2 -19   -2.40    5.40
   0   2  19   -1.40    5.00
   0  -2 -20    8.70    6.90
   0   2  20    1.10    5.80
   0  -2 -21   -4.50    5.90
   0   2  21    0.00    5.80
  -1  -2  22   -1.70    4.30
   1   2 -22   -3.40    6.20
  -1  -2  21    5.20    4.40
   1   2 -21    7.20    6.50
  -1  -2  20    3.40    4.20
   1   2 -20   -0.90    5.60
  -1  -2  19    9.10    4.40
   1   2 -19    4.60    5.60
  -1  -2  18    9.40    4.00
   1   2 -18    6.60    5.50
  -1  -2  17  129.39    9.70
   1   2 -17  168.88   13.10
   1   2 -17  156.38   10.50
  -1  -2  16    3.30    3.20
   1   2 -16    2.70    3.40
   1   2 -16   -1.30    4.70
  -1  -2  15  266.47   14.10
   1   2 -15  297.67   17.20
   1   2 -15  264.97   14.50
   1   2 -15  269.37   16.20
  -1  -2  14    8.70    3.10
   1   2 -14    9.60    3.30
   1   2 -14    3.30    3.60
   1   2 -14    4.90    4.50
  -1  -2  13   24.40    3.80
   1   2 -13   23.90    5.30
   1   2 -13   36.30    5.90
   1   2 -13   21.10    4.00
  -1  -2  12   28.90    3.70
   1   2 -12   36.50    4.30
   1   2 -12   30.90    5.50
   1   2 -12   30.40    5.10
   1   2 -11  329.07   16.90
   1   2 -11  301.37   17.10
   1   2 -11  336.07   15.50
  -1  -2  10   -0.50    1.70
   1   2 -10    4.40    2.80
   1   2 -10    0.30    1.80
   1   2 -10    3.50    2.60
  -1  -2   9   63.89    4.40
   1   2  -9   57.19    4.50
   1   2  -9   69.99    5.90
   1   2  -9   67.99    6.70
  -1  -2   8  125.19    6.60
   1   2  -8  124.39    6.80
   1   2  -8  139.49    8.70
   1   2  -8  134.39    8.20
  -1  -2   7  722.73   29.90
   1   2  -7  730.43   30.10
   1   2  -7  686.23   31.70
   1   2  -7  751.72   31.70
  -1  -2   6  271.87   11.90
  -1  -2   6  258.27   13.50
   1   2  -6  287.67   13.60
   1   2  -6  288.57   12.10
  -1  -2   5 1447.46   67.69
  -1  -2   5 1523.25   87.89
   1   2  -5 1580.54   88.79
   1   2  -5 1579.14   68.79
  -1  -2   4   29.50    1.70
  -1  -2   4   23.30    2.90
   1   2  -4   30.70    1.70
   1   2  -4   34.80    3.50
  -1  -2   3  322.97   12.60
  -1  -2   3  307.27   14.10
   1   2  -3  307.07   12.60
   1   2  -3  303.07   14.10
  -1  -2   2   43.40    3.30
   1   2  -2   47.20    3.40
  -1  -2   1  513.15   20.70
   1   2  -1  527.65   21.80
   1   2  -1  499.05   20.70
  -1  -2   0  132.69    6.60
  -1  -2   0  126.59    5.70
   1   2   0  128.39    6.50
   1   2   0  128.69    5.80
  -1  -2  -1   78.29    3.90
  -1  -2  -1   68.79    4.30
   1   2   1   76.29    4.00
  -1  -2  -2  126.29    6.50
  -1  -2  -2  130.29    6.10
   1   2   2  116.99    6.20
  -1  -2  -3  638.54   26.90
  -1  -2  -3  661.83   27.30
   1   2   3  640.54   27.20
   1   2   3  629.74   27.10
  -1  -2  -4   13.80    2.30
  -1  -2  -4   21.60    2.70
   1   2   4   16.70    2.50
   1   2   4   16.90    2.50
  -1  -2  -5  889.31   38.30
  -1  -2  -5  923.81   38.20
   1   2   5  911.81   38.40
   1   2   5  920.61   38.30
  -1  -2  -6    1.60    1.80
  -1  -2  -6    2.20    1.80
   1   2   6   -0.40    2.00
   1   2   6    4.20    1.90
  -1  -2  -7  249.68   12.20
  -1  -2  -7  243.48   12.30
   1   2   7  257.67   12.70
   1   2   7  231.48   12.10
  -1  -2  -8   17.60    3.40
  -1  -2  -8   24.60    3.70
   1   2   8   28.30    4.20
   1   2   8   25.30    3.80
  -1  -2  -9   21.20    4.00
  -1  -2  -9   20.70    3.50
   1   2   9   16.40    3.90
   1   2   9   31.90    4.40
  -1  -2 -10   66.89    6.20
  -1  -2 -10   38.50    5.10
   1   2  10   55.39    5.90
   1   2  10   55.39    5.90
  -1  -2 -11    3.70    2.90
  -1  -2 -11    0.20    3.10
   1   2  11   -2.40    3.10
   1   2  11   -0.70    2.70
  -1  -2 -12   79.09    7.90
  -1  -2 -12   96.79    7.90
   1   2  12   92.69    7.80
   1   2  12  111.99    8.80
  -1  -2 -13   -1.80    3.20
  -1  -2 -13    1.30    3.80
   1   2  13    3.50    3.30
   1   2  13    5.80    4.30
  -1  -2 -14   43.90    6.60
   1   2  14   51.39    9.50
   1   2  14   51.79    6.60
   1   2  15    3.30    4.60
  -1  -2 -16   30.80    6.70
   1   2  16   32.20    6.90
  -1  -2 -17    5.10    5.20
   1   2  17    7.70    5.20
  -1  -2 -18   12.00    6.10
   1   2  18   -0.50    4.70
  -1  -2 -19    3.80    6.00
   1   2  19    2.20    5.80
  -1  -2 -20   15.60    7.30
   1   2  20   15.70    6.50
  -2  -2  22    2.80    4.40
   2   2 -22   -4.90    6.20
  -2  -2  21    8.10    4.70
   2   2 -21   13.20    8.50
  -2  -2  20   53.49    6.70
   2   2 -20   62.99   10.40
  -2  -2  19   26.60    4.90
   2   2 -19   21.90    6.90
  -2  -2  18   27.40    4.90
   2   2 -18    6.90    5.60
  -2  -2  17   -4.90    3.10
   2   2 -17    0.70    4.90
   2   2 -17    6.70    3.90
  -2  -2  16   22.10    4.20
   2   2 -16   19.90    6.10
   2   2 -16   23.90    4.90
  -2  -2  15  426.06   19.50
   2   2 -15  383.66   19.80
   2   2 -15  437.96   29.70
  -2  -2  14  686.33   30.20
   2   2 -14  713.83   30.90
   2   2 -14  672.43   33.30
   2   2 -14  683.83   32.60
  -2  -2  13  338.37   15.80
   2   2 -13  344.67   18.20
   2   2 -13  338.07   16.30
   2   2 -13  303.57   18.40
  -2  -2  12  563.74   24.10
   2   2 -12  547.15   24.50
   2   2 -12  546.35   26.90
   2   2 -12  526.45   26.20
  -2  -2  11  125.59    7.10
   2   2 -11  120.39    7.40
   2   2 -11  118.29    9.50
   2   2 -11  122.89    9.10
  -2  -2  10   -0.10    1.70
   2   2 -10    0.80    1.90
   2   2 -10   -3.60    2.50
   2   2 -10   -1.60    3.00
  -2  -2   9  309.37   13.80
   2   2  -9  291.27   16.00
   2   2  -9  314.27   14.00
   2   2  -9  308.77   15.90
  -2  -2   8  545.35   22.60
   2   2  -8  546.15   24.80
   2   2  -8  517.65   24.90
   2   2  -8  531.65   22.80
  -2  -2   7  249.78   10.70
   2   2  -7  207.38   12.80
   2   2  -7  252.27   10.90
   2   2  -7  245.28   12.80
  -2  -2   6  517.85   21.60
   2   2  -6  515.05   21.80
   2   2  -6  540.95   23.70
  -2  -2   5   49.99    2.80
  -2  -2   5   60.29    5.20
   2   2  -5   57.19    4.80
   2   2  -5   45.40    2.90
  -2  -2   4  320.97   12.80
  -2  -2   4  282.57   14.50
   2   2  -4  313.27   14.60
   2   2  -4  308.17   13.00
  -2  -2   3  198.98    8.40
  -2  -2   3  203.08   10.20
   2   2  -3  200.98   10.00
   2   2  -3  197.28    8.60
  -2  -2   2  595.94   23.60
  -2  -2   2  572.44   23.60
  -2  -2   2  548.85   24.90
   2   2  -2  586.64   24.90
  -2  -2   1 1036.40   40.60
  -2  -2   1  981.80   40.60
  -2  -2   1  977.20   41.60
  -2  -2   0 1189.78   48.50
  -2  -2  -1   36.90    2.90
  -2  -2  -1   30.10    3.10
   2   2   1   44.10    3.40
   2   2   1   38.50    2.80
  -2  -2  -2  479.95   20.60
  -2  -2  -2  473.65   21.00
   2   2   2  480.25   20.70
   2   2   2  493.15   20.90
  -2  -2  -3  404.46   18.00
  -2  -2  -3  402.76   17.70
   2   2   3  410.16   17.90
   2   2   3  401.06   17.90
  -2  -2  -4    6.80    1.90
  -2  -2  -4    8.70    2.20
   2   2   4    9.00    2.10
   2   2   4    7.90    2.30
  -2  -2  -5   50.39    4.40
  -2  -2  -5   46.50    4.30
   2   2   5   49.80    4.90
   2   2   5   58.49    5.10
  -2  -2  -6   19.90    3.30
   2   2   6   26.30    3.30
   2   2   6   35.40    4.30
  -2  -2  -7    9.60    2.80
  -2  -2  -7    4.40    2.50
   2   2   7    8.20    3.10
   2   2   7   11.30    2.80
  -2  -2  -8   40.80    4.60
  -2  -2  -8   39.20    4.50
   2   2   8   31.50    4.60
   2   2   8   39.80    4.40
  -2  -2  -9    7.10    3.00
  -2  -2  -9   15.10    3.80
   2   2   9   21.70    4.40
   2   2   9   17.30    3.60
  -2  -2 -10    8.80    3.40
  -2  -2 -10    8.00    3.30
   2   2  10    6.60    3.10
   2   2  10    2.50    3.70
  -2  -2 -11   20.50    4.40
  -2  -2 -11   30.00    4.70
   2   2  11   20.30    4.90
   2   2  11   24.90    4.50
  -2  -2 -12   18.50    4.50
  -2  -2 -12   21.20    4.70
   2   2  12   15.10    4.70
   2   2  12   24.20    5.20
  -2  -2 -13   54.19    7.00
   2   2  13   53.39    7.20
   2   2  13   61.89    6.80
  -2  -2 -14   48.20    7.10
   2   2  14   54.99    6.90
   2   2  14   43.60    7.00
  -2  -2 -15    0.50    4.50
   2   2  15    5.10    5.00
  -2  -2 -16    1.10    4.90
   2   2  16    1.00    5.30
  -2  -2 -17   -1.80    5.00
   2   2  17   -1.30    4.90
  -2  -2 -18    1.00    5.20
   2   2  18    8.80    5.70
  -2  -2 -19   11.60    6.60
   2   2  19   -2.90    5.90
  -3  -2  21   -0.40    4.00
   3   2 -21   -5.60    5.80
  -3  -2  20    4.80    4.20
   3   2 -20   -2.90   10.00
  -3  -2  19   46.00    6.00
   3   2 -19   52.49    9.60
  -3  -2  18    0.40    3.50
   3   2 -18   -0.40    5.60
  -3  -2  17   -0.10    3.20
   3   2 -17    0.80    5.00
   3   2 -17   -0.30    3.40
  -3  -2  16   12.90    3.60
   3   2 -16   12.30    6.10
   3   2 -16   17.50    4.50
  -3  -2  15    2.90    3.00
   3   2 -15    7.70    3.40
   3   2 -15    4.20    4.90
  -3  -2  14  373.86   17.00
   3   2 -14  303.27   23.10
   3   2 -14  360.16   17.50
  -3  -2  13  299.97   14.60
   3   2 -13  305.17   15.10
   3   2 -13  315.27   17.40
   3   2 -13  289.97   17.70
  -3  -2  12   39.20    4.00
   3   2 -12   32.60    5.60
   3   2 -12   36.70    6.70
   3   2 -12   37.30    4.30
  -3  -2  11   22.70    3.10
   3   2 -11   18.50    4.80
   3   2 -11   16.80    5.20
   3   2 -11   27.90    3.60
  -3  -2  10   -0.30    1.80
   3   2 -10   -1.20    1.80
   3   2 -10    3.40    3.80
   3   2 -10    0.10    2.90
  -3  -2   9   86.79    5.30
   3   2  -9   92.29    5.60
   3   2  -9   74.09    7.60
   3   2  -9  100.39    7.90
  -3  -2   8   65.49    4.20
   3   2  -8   60.59    6.80
   3   2  -8   81.09    7.30
   3   2  -8   64.39    4.50
  -3  -2   7   11.10    1.80
   3   2  -7   11.00    3.20
   3   2  -7   10.30    3.60
   3   2  -7   15.00    2.20
  -3  -2   6   77.49    4.20
  -3  -2   6   80.09    6.60
   3   2  -6   70.29    4.50
   3   2  -6   87.49    6.60
  -3  -2   5    8.40    1.50
  -3  -2   5    7.60    2.90
   3   2  -5    9.80    3.00
   3   2  -5    9.90    1.80
   3   2  -4 1673.63   67.99
   3   2  -4 1604.94   66.39
  -3  -2   3  514.45   23.40
  -3  -2   3  517.05   21.60
   3   2  -3  500.05   21.90
   3   2  -3  554.84   23.30
  -3  -2   2  215.98    9.70
  -3  -2   2  223.78    9.80
  -3  -2   2  208.68   11.00
  -3  -2   1   14.70    2.60
  -3  -2   1   17.90    2.20
  -3  -2   1   18.70    2.10
   3   2  -1   19.20    2.90
  -3  -2   0  217.38    9.90
  -3  -2   0  192.18   10.50
  -3  -2   0  221.88   10.00
   3   2   0  210.18   10.40
  -3  -2  -1   40.50    4.00
  -3  -2  -1   42.40    3.60
  -3  -2  -1   42.00    3.80
   3   2   1   48.20    4.20
  -3  -2  -2  157.78    8.70
  -3  -2  -2  180.18    8.90
  -3  -2  -2  166.38    8.50
   3   2   2  164.98    8.60
  -3  -2  -3   48.80    4.30
  -3  -2  -3   31.40    3.90
  -3  -2  -4   68.49    5.10
  -3  -2  -4   60.99    4.90
   3   2   4   67.39    5.00
   3   2   4   64.89    5.60
  -3  -2  -5    4.70    2.20
   3   2   5    5.40    2.40
   3   2   5    4.80    2.20
  -3  -2  -6  442.46   20.10
  -3  -2  -6  446.96   20.20
   3   2   6  424.06   19.80
   3   2   6  438.26   20.50
  -3  -2  -7   87.99    6.80
  -3  -2  -7   86.49    6.60
   3   2   7   81.89    7.10
   3   2   7   94.19    6.50
  -3  -2  -8   33.40    4.50
  -3  -2  -8   42.80    5.20
   3   2   8   20.20    4.30
   3   2   8   33.10    4.30
  -3  -2  -9    0.80    3.00
  -3  -2  -9    2.90    2.80
   3   2   9    2.00    3.40
   3   2   9    7.50    2.90
  -3  -2 -10   41.00    5.20
  -3  -2 -10   40.00    5.60
   3   2  10   40.60    5.90
   3   2  10   46.00    5.30
  -3  -2 -11   40.20    5.80
  -3  -2 -11   43.70    5.80
   3   2  11   35.60    5.80
   3   2  11   54.29    6.00
  -3  -2 -12   68.09    7.50
   3   2  12   75.29    7.10
  -3  -2 -13   10.10    4.40
   3   2  13   14.90    4.20
   3   2  13   21.00    5.80
  -3  -2 -14    2.00    4.40
   3   2  14    1.00    4.70
  -3  -2 -15    5.80    4.60
   3   2  15    8.30    5.40
  -3  -2 -16    5.30    5.10
   3   2  16    7.50    5.70
  -3  -2 -17    3.30    5.20
   3   2  17   -0.10    5.60
  -3  -2 -18    8.00    5.90
   3   2  18    6.00    6.40
  -4  -2  20    8.00    4.20
   4   2 -20   21.70    7.90
  -4  -2  19   -0.40    3.40
   4   2 -19   -5.30    9.20
  -4  -2  18    0.70    3.40
   4   2 -18    2.80    6.10
  -4  -2  17   32.80    4.90
   4   2 -17   29.90    5.20
   4   2 -17   24.60    7.40
  -4  -2  16   -0.80    3.10
   4   2 -16    1.90    4.00
   4   2 -16    6.50    5.30
  -4  -2  15   42.10    4.90
   4   2 -15   45.70    5.60
   4   2 -15   26.40    7.40
  -4  -2  14   69.59    5.80
   4   2 -14   72.59    6.50
   4   2 -14   56.39    8.20
  -4  -2  13  139.89    8.30
   4   2 -13  157.48    9.10
   4   2 -13   99.99   14.70
  -4  -2  12    4.20    2.40
   4   2 -12    0.50    2.50
   4   2 -12    9.30    4.40
   4   2 -12    6.80    4.90
  -4  -2  11  273.07   12.60
   4   2 -11  278.37   15.60
   4   2 -11  220.58   15.40
   4   2 -11  273.67   13.30
  -4  -2  10   20.70    2.90
   4   2 -10   30.80    6.10
   4   2 -10   25.60    5.10
   4   2 -10   24.30    3.50
  -4  -2   9  405.56   17.40
   4   2  -9  400.06   18.70
   4   2  -9  382.36   20.00
   4   2  -9  386.06   20.60
  -4  -2   8   13.30    2.20
   4   2  -8    9.00    2.50
   4   2  -8   17.20    4.30
   4   2  -8   14.60    4.40
  -4  -2   7  289.37   12.60
   4   2  -7  268.77   15.40
   4   2  -7  290.67   15.20
   4   2  -7  270.57   13.10
  -4  -2   6   94.99    5.20
   4   2  -6   90.39    7.30
   4   2  -6   89.59    5.80
  -4  -2   5   58.39    6.30
  -4  -2   5   56.49    4.00
   4   2  -5   65.29    4.50
   4   2  -5   72.69    6.50
  -4  -2   4  232.88   12.40
  -4  -2   4  227.58   10.30
   4   2  -4  219.58   10.80
   4   2  -4  220.48   12.00
  -4  -2   3   92.39    5.40
  -4  -2   3   86.99    6.90
  -4  -2   3   91.49    5.20
   4   2  -3   89.69    6.60
  -4  -2   2   35.70    3.40
  -4  -2   2   33.00    4.30
  -4  -2   2   37.90    3.30
   4   2  -2   42.40    4.60
  -4  -2   1  210.78   12.10
  -4  -2   1  208.08   10.20
  -4  -2   1  220.98   10.30
   4   2  -1  204.98   10.80
  -4  -2   0   69.39    5.00
  -4  -2   0   67.99    4.90
   4   2   0   66.59    5.20
  -4  -2  -1    7.70    3.00
  -4  -2  -1    7.70    2.40
  -4  -2  -1    9.90    2.60
   4   2   1   11.90    2.60
  -4  -2  -2   23.10    3.20
  -4  -2  -2   33.30    4.40
   4   2   2   23.10    3.20
  -4  -2  -3   95.99    6.50
  -4  -2  -3   88.19    6.30
  -4  -2  -3   95.59    6.90
   4   2   3   90.69    6.10
  -4  -2  -4  242.58   12.50
  -4  -2  -4  242.18   13.00
  -4  -2  -4  238.78   12.30
   4   2   4  244.48   12.10
  -4  -2  -5  322.97   16.50
  -4  -2  -5  375.46   17.60
  -4  -2  -5  361.16   16.90
   4   2   5  341.27   16.40
  -4  -2  -6   -0.60    3.30
  -4  -2  -6    1.10    2.60
  -4  -2  -6   -3.40    2.20
   4   2   6    1.30    2.30
  -4  -2  -7  489.65   23.70
  -4  -2  -7  534.25   24.20
   4   2   7  540.05   23.70
  -4  -2  -8   -0.90    2.80
  -4  -2  -8   -0.50    2.80
   4   2   8    2.60    3.40
   4   2   8   -3.00    2.30
  -4  -2  -9   -0.20    3.00
  -4  -2  -9    7.40    3.80
   4   2   9    9.00    3.10
   4   2   9    1.00    3.40
  -4  -2 -10   32.60    5.10
   4   2  10   39.20    6.10
   4   2  10   41.80    5.20
  -4  -2 -11   -0.30    3.40
   4   2  11   -3.10    3.90
   4   2  11   -6.80    3.00
  -4  -2 -12    3.30    4.00
   4   2  12   -2.00    2.90
   4   2  12   -1.00    4.00
  -4  -2 -13    5.80    4.20
   4   2  13    4.80    3.40
   4   2  13    4.70    5.10
  -4  -2 -14    6.00    7.70
   4   2  14   10.80    5.80
  -4  -2 -15    1.00    4.50
   4   2  15   -1.50    5.50
  -4  -2 -16   -2.50    4.40
   4   2  16   -5.10    5.20
  -4  -2 -17    5.30    5.00
   4   2  17    9.50    6.10
  -5  -2  18    7.20    4.70
   5   2 -18    3.40   11.80
  -5  -2  17    2.50    3.50
   5   2 -17   -0.60    3.50
   5   2 -17    9.50    6.40
  -5  -2  16    3.90    3.40
   5   2 -16    7.30    6.00
   5   2 -16    4.80    3.40
  -5  -2  15   12.00    3.60
   5   2 -15   14.00    6.30
   5   2 -15   10.50    3.70
  -5  -2  14    5.00    2.90
   5   2 -14   10.30    5.80
   5   2 -14    4.90    3.30
  -5  -2  13   98.69    6.80
   5   2 -13   78.79    7.10
   5   2 -13   83.49    9.90
  -5  -2  12  266.37   12.90
   5   2 -12  278.77   17.20
   5   2 -12  242.68   13.50
  -5  -2  11   11.10    2.80
   5   2 -11   19.10    3.50
   5   2 -11   12.20    5.10
  -5  -2  10   82.39    5.70
   5   2 -10   83.79    8.30
   5   2 -10   88.69    9.30
   5   2 -10   75.09    6.40
  -5  -2   9    2.80    2.50
   5   2  -9    4.50    3.60
   5   2  -9    4.50    2.60
   5   2  -9   -1.00    4.00
  -5  -2   8    1.80    2.00
   5   2  -8    2.60    2.30
   5   2  -8    3.70    4.30
  -5  -2   7   20.50    2.80
   5   2  -7   21.80    4.90
   5   2  -7   16.50    2.90
   5   2  -7   20.10    4.60
  -5  -2   6    9.60    2.30
   5   2  -6   10.00    3.50
   5   2  -6    8.00    2.90
   5   2  -6   21.10    5.00
  -5  -2   5    7.80    2.20
   5   2  -5    3.60    3.10
   5   2  -5    6.50    3.80
  -5  -2   4    0.40    1.90
  -5  -2   4   -0.60    3.10
   5   2  -4    2.20    2.90
  -5  -2   3   39.90    5.30
  -5  -2   3   57.39    4.70
  -5  -2   3   51.89    4.30
   5   2  -3   40.50    5.00
  -5  -2   2  473.35   20.50
  -5  -2   2  454.45   20.90
  -5  -2   2  442.16   21.70
   5   2  -2  459.25   21.10
  -5  -2   1   10.00    3.40
  -5  -2   1   21.80    3.50
  -5  -2   1   16.60    3.10
   5   2  -1   14.60    3.20
  -5  -2   0  185.08    9.80
  -5  -2   0  179.08   10.50
  -5  -2   0  165.78    9.70
   5   2   0  180.78    9.80
  -5  -2  -1   10.90    3.00
  -5  -2  -1    5.30    2.90
  -5  -2  -1    7.10    2.90
   5   2   1    9.20    2.70
  -5  -2  -2   28.40    4.10
  -5  -2  -2   31.40    4.20
  -5  -2  -2   23.30    4.00
   5   2   2   24.20    3.60
  -5  -2  -3    6.40    2.90
  -5  -2  -3    8.70    3.10
  -5  -2  -3    9.80    3.40
   5   2   3    5.60    2.60
  -5  -2  -4    3.30    3.20
  -5  -2  -4   -0.60    2.50
  -5  -2  -4    7.50    3.20
   5   2   4    2.30    2.40
  -5  -2  -5   14.20    4.10
  -5  -2  -5   23.10    4.20
  -5  -2  -5   21.60    3.90
   5   2   5   18.50    3.50
  -5  -2  -6    3.30    3.10
  -5  -2  -6    0.70    3.90
  -5  -2  -6    5.00    2.90
   5   2   6    1.50    2.40
  -5  -2  -7   47.00    5.40
  -5  -2  -7   52.69    6.90
  -5  -2  -7   37.30    5.20
   5   2   7   40.20    4.70
  -5  -2  -8   47.60    5.70
  -5  -2  -8   57.89    7.50
  -5  -2  -8   58.49    8.00
   5   2   8   60.39    5.70
  -5  -2  -9   15.40    6.30
  -5  -2  -9   18.40    4.20
   5   2   9   18.20    3.80
  -5  -2 -10    2.30    3.40
  -5  -2 -10    3.40    4.90
   5   2  10    1.10    2.80
  -5  -2 -11    7.00    5.40
  -5  -2 -11    0.30    3.60
   5   2  11   12.90    3.70
  -5  -2 -12    3.00    5.30
  -5  -2 -12    0.80    3.70
   5   2  12    4.60    3.30
  -5  -2 -13   -1.60    3.70
  -5  -2 -14    4.10    4.50
  -5  -2 -15   16.50    5.60
  -6  -2  16   -0.60    3.10
   6   2 -16   -4.90    3.20
   6   2 -16    7.40    6.60
  -6  -2  15   11.30    3.50
   6   2 -15   17.80    4.00
   6   2 -15    6.80    6.30
  -6  -2  14    2.00    3.00
   6   2 -14   -1.50    5.60
   6   2 -14   -3.60    2.80
  -6  -2  13   -1.40    2.80
   6   2 -13    6.90    5.80
   6   2 -13    8.70    3.20
  -6  -2  12   38.20    4.50
   6   2 -12   34.60    7.00
   6   2 -12   42.30    5.10
  -6  -2  11   -0.80    2.60
   6   2 -11    4.70    5.30
   6   2 -11   -1.90    2.60
  -6  -2  10   34.50    4.10
   6   2 -10   38.10    4.70
   6   2 -10   42.70    8.40
  -6  -2   9   18.80    3.20
   6   2  -9   18.60    5.70
   6   2  -9   27.80    4.00
  -6  -2   8    1.60    2.30
   6   2  -8    6.00    3.90
   6   2  -8   -1.40    2.30
   6   2  -8    0.90    4.50
  -6  -2   7    0.00    2.30
   6   2  -7    4.20    4.60
   6   2  -7    1.30    3.30
   6   2  -7   10.00    2.90
  -6  -2   6   -2.60    2.20
   6   2  -6    4.00    4.30
   6   2  -6    2.20    2.50
  -6  -2   5  179.98    9.40
  -6  -2   5  176.68    9.80
   6   2  -5  176.68   11.10
   6   2  -5  160.58   11.90
  -6  -2   4   22.30    3.70
  -6  -2   4   21.30    3.40
   6   2  -4    8.70    3.70
  -6  -2   3  428.66   19.70
  -6  -2   3  435.96   20.10
  -6  -2   3  398.66   21.50
   6   2  -3  478.15   21.00
  -6  -2   2  163.18   11.30
  -6  -2   2  194.48   10.50
  -6  -2   2  185.28   10.10
   6   2  -2  185.38   10.70
  -6  -2   1  101.19    7.70
  -6  -2   1  114.39    8.70
  -6  -2   1  115.19    7.60
   6   2  -1  111.59    7.80
  -6  -2   0  184.48   10.20
  -6  -2   0  155.88    9.70
  -6  -2   0  163.18   10.60
   6   2   0  161.68    9.60
  -6  -2  -1   35.50    5.00
  -6  -2  -1   29.40    4.70
  -6  -2  -1   42.20    5.10
   6   2   1   29.50    4.10
  -6  -2  -2    1.10    3.20
  -6  -2  -2    1.70    3.10
  -6  -2  -2    1.50    2.90
   6   2   2    0.20    2.50
  -6  -2  -3  152.28    9.80
  -6  -2  -3  155.28   10.30
   6   2   3  150.98    9.00
  -6  -2  -4    4.80    3.30
  -6  -2  -4    2.80    3.80
  -6  -2  -4    6.80    3.30
   6   2   4    2.80    2.60
  -6  -2  -5   -2.00    3.10
  -6  -2  -5   -1.00    2.70
  -6  -2  -5    5.60    4.20
   6   2   5    2.00    2.50
  -6  -2  -6   13.20    3.80
  -6  -2  -6   21.50    5.10
   6   2   6   20.80    3.70
  -6  -2  -7   41.60    6.70
  -6  -2  -7   41.80    5.40
   6   2   7   42.30    4.90
  -6  -2  -8    6.50    5.00
  -6  -2  -8    2.70    3.30
   6   2   8   -0.40    2.70
  -6  -2  -9   63.09    8.50
  -6  -2  -9   54.39    6.30
   6   2   9   57.89    6.00
  -6  -2 -10   17.40    6.20
  -6  -2 -10   19.40    4.50
  -6  -2 -11    7.40    3.90
  -6  -2 -11    6.80    5.80
   6   2  11    1.70    3.00
  -6  -2 -12   -1.80    5.50
  -6  -2 -12   -1.20    3.40
   6   2  12   -1.40    2.80
  -7  -2  12    3.00    3.00
   7   2 -12    1.50    5.70
   7   2 -12   -1.30    2.80
  -7  -2  11   85.69    6.70
   7   2 -11   72.39    9.50
   7   2 -11   71.79    6.80
  -7  -2  10   22.00    3.70
   7   2 -10   29.50    7.00
   7   2 -10   19.50    3.80
  -7  -2   9   65.09    5.60
   7   2  -9   71.89    6.50
   7   2  -9   63.89    8.80
  -7  -2   8    2.30    2.70
   7   2  -8    3.80    2.80
  -7  -2   7   12.20    3.50
  -7  -2   7    9.10    3.10
   7   2  -7   11.70    5.10
  -7  -2   6    6.00    3.20
  -7  -2   6    5.40    3.00
   7   2  -6   11.40    4.00
   7   2  -6   13.40    5.30
  -7  -2   5    3.50    2.90
  -7  -2   5   -3.80    2.80
   7   2  -5   12.00    4.90
   7   2  -5    0.00    3.10
  -7  -2   4    9.80    3.50
  -7  -2   4    8.50    3.20
   7   2  -4    5.20    4.40
  -7  -2   3   11.40    3.60
  -7  -2   3   14.80    3.70
   7   2  -3   12.40    4.80
   7   2  -3   19.90    4.00
  -7  -2   2    2.80    3.30
  -7  -2   2    3.80    3.00
   7   2  -2    5.50    3.00
  -7  -2   1   30.10    5.30
  -7  -2   1   37.00    5.20
  -7  -2   1   35.60    4.90
   7   2  -1   34.80    4.60
  -7  -2   0    0.60    3.60
  -7  -2   0    3.20    3.20
  -7  -2   0    1.70    3.20
   7   2   0   -0.20    2.50
  -7  -2  -1   66.89    6.50
  -7  -2  -1   61.09    6.60
  -7  -2  -1   53.09    6.40
   7   2   1   53.69    5.50
  -7  -2  -2    2.40    3.30
  -7  -2  -2    3.60    3.40
  -7  -2  -2    1.70    3.80
   7   2   2   -4.10    2.10
  -7  -2  -3    0.40    3.00
  -7  -2  -3    0.70    3.80
   7   2   3    2.70    2.60
  -7  -2  -4    7.70    3.60
  -7  -2  -4    6.50    5.20
   7   2   4    7.30    2.90
  -7  -2  -5   -2.20    3.00
  -7  -2  -5   -8.80    3.70
   7   2   5   -0.10    2.60
  -7  -2  -6    9.80    3.70
  -7  -2  -6    1.10    4.60
   7   2   6    4.10    2.70
  -7  -2  -7    0.10    4.70
  -7  -2  -7   -0.60    2.80
   7   2   7    0.50    2.50
  -7  -2  -8   19.10    4.20
  -7  -2  -8   18.70    6.50
   7   2   8   12.70    3.40
  -8  -2   5   22.30    4.10
  -8  -2   5   33.80    4.80
   8   2  -5   15.90    5.40
   8   2  -5   18.50    5.70
  -8  -2   4   38.80    5.20
  -8  -2   4   33.60    4.80
   8   2  -4   25.20    5.80
   8   2  -4   30.70    4.90
  -8  -2   3    5.80    3.50
  -8  -2   3    5.50    3.60
   8   2  -3    7.10    4.50
   8   2  -3   -0.60    3.00
  -8  -2   2   10.50    3.90
  -8  -2   2   17.10    4.40
   8   2  -2   11.60    4.90
  -8  -2   1   41.80    5.60
   8   2  -1   38.00    4.90
   8   2  -1   52.79    6.70
   8   2   0   76.49    6.70
   8   2   0   81.29    7.90
  -8  -2  -1   35.80    5.70
   8   2   1   33.90    7.00
   8   2   1   38.20    5.90
  -9   3  -5   47.80    8.70
  -9   3  -4    4.40    5.80
  -9   3  -3   -2.70    5.10
  -9   3  -2    2.40    4.80
  -9   3  -1   23.00    6.40
  -9   3   0   18.20    5.80
  -9   3   1    3.60    4.50
  -9   3   2    0.40    4.60
  -9   3   3    1.80    4.30
  -9   3   4    4.30    4.90
   9  -3  -5   29.60    3.10
   9  -3  -5   37.50    3.30
  -9   3   5   35.60    6.60
   9  -3  -6   32.20    3.90
  -9   3   6   34.70    6.30
   9  -3  -7   19.30    3.80
   9  -3  -7   19.50    4.70
  -9   3   7   16.30    5.30
  -8   3 -11   19.10    7.40
  -8   3 -10   15.30    7.10
  -8   3  -9   48.40    9.00
  -8   3  -8    3.60    5.60
  -8   3  -7   13.60    6.40
  -8   3  -6   79.39    9.20
  -8   3  -5   26.80    6.30
  -8   3  -4    1.30    4.80
  -8   3  -3  109.09   10.00
  -8   3  -2   76.09    8.20
  -8   3  -1    3.50    4.40
  -8   3   0  165.18   11.90
  -8   3   1   49.50    6.80
  -8   3   2   91.49    8.30
   8  -3  -3   32.60    2.70
   8  -3  -3   32.80    2.70
  -8   3   3   26.30    5.40
   8  -3  -4   -1.70    1.70
   8  -3  -4    0.00    1.90
  -8   3   4    5.50    4.30
   8  -3  -5    5.60    2.70
   8  -3  -5    9.00    2.70
  -8   3   5    7.20    4.50
   8  -3  -6   61.99    5.70
   8  -3  -6   44.50    4.80
  -8   3   6   37.40    5.90
   8  -3  -7   72.39    6.80
   8  -3  -7   54.49    5.90
  -8   3   7   80.89    8.00
   8  -3  -8    5.00    3.50
   8  -3  -8    4.40    3.50
  -8   3   8    4.90    4.40
   8  -3  -9   20.80    4.70
   8  -3  -9   26.80    5.00
  -8   3   9   21.50    4.90
   8  -3 -10   -1.80    3.70
   8  -3 -10    2.10    3.60
  -8   3  10   10.30    4.60
   8  -3 -11   17.50    6.10
  -8   3  11   11.80    5.10
   8  -3 -12   -6.30    4.30
  -8   3  12    3.60    4.80
  -7   3 -15    5.30    6.70
  -7   3 -14   -9.50    5.30
  -7   3 -14    4.00    1.50
  -7   3 -14   -0.20    1.40
  -7   3 -13    7.50    6.60
  -7   3 -12    3.50    6.20
  -7   3 -11   58.49    9.40
  -7   3 -10    0.20    5.10
  -7   3  -9    8.40    5.70
  -7   3  -8    2.60    4.90
  -7   3  -7    0.70    4.80
  -7   3  -6    3.10    4.40
  -7   3  -5    3.00    4.50
  -7   3  -4   21.90    5.60
  -7   3  -2   58.39    7.20
  -7   3  -1  190.48   12.10
  -7   3   0   14.00    4.10
   7  -3  -1   17.60    4.90
  -7   3   1   21.10    4.80
   7  -3  -2    5.20    1.50
   7  -3  -2    6.20    1.40
   7  -3  -2    5.50    3.90
  -7   3   2    5.90    3.70
   7  -3  -3    9.40    2.00
   7  -3  -3   10.10    2.30
  -7   3   3    6.20    4.00
   7  -3  -4   -0.40    1.90
   7  -3  -4    0.20    2.20
  -7   3   4   -1.80    3.20
   7  -3  -5    3.80    2.50
   7  -3  -5    9.00    3.10
  -7   3   5    3.30    3.60
   7  -3  -6   36.20    4.40
   7  -3  -6   29.00    4.50
   7  -3  -7   68.59    6.50
   7  -3  -7   90.09    7.60
  -7   3   7   68.79    7.20
   7  -3  -8   25.90    4.70
   7  -3  -8   22.10    4.50
  -7   3   8   19.20    4.80
   7  -3  -9   99.59    8.70
   7  -3  -9  105.29    8.90
  -7   3   9  111.29    9.10
   7  -3 -10   10.00    4.40
   7  -3 -10    7.80    3.80
  -7   3  10    7.20    4.30
   7  -3 -11   42.20    6.50
  -7   3  11   49.10    6.60
   7  -3 -12   31.80    6.40
  -7   3  12   38.10    6.10
   7  -3 -13    7.60    5.00
  -7   3  13    1.80    4.60
   7  -3 -14    7.20    5.50
  -7   3  14   13.50    5.10
   7  -3 -15   -9.30    4.90
  -7   3  15   -4.00    4.50
  -6   3 -17    7.80    3.80
  -6   3 -17    3.40    5.90
  -6   3 -16   10.00    3.60
  -6   3 -16   12.00    3.40
  -6   3 -15    7.80    3.20
  -6   3 -15    7.30    2.90
  -6   3 -15    3.60    5.60
  -6   3 -14    1.00    2.30
  -6   3 -14    4.80    2.70
  -6   3 -14    2.30    5.70
  -6   3 -13   94.99   10.80
  -6   3 -13   76.19    5.70
  -6   3 -13   80.09    5.90
  -6   3 -12   28.30    3.30
  -6   3 -12   24.30    6.60
  -6   3 -12   23.20    3.00
  -6   3 -11   10.80    2.10
  -6   3 -11   19.50    5.90
  -6   3 -11   11.60    2.20
  -6   3 -10  146.29    6.70
  -6   3 -10  148.19    6.70
  -6   3 -10  157.68   12.40
  -6   3  -9  148.59   12.00
  -6   3  -7  321.77   18.10
  -6   3  -6   -0.50    4.00
  -6   3  -6    2.00    3.60
  -6   3  -5  167.38   10.90
  -6   3  -5  183.28   11.80
  -6   3  -4   -2.20    3.20
   6  -3   3    1.90    3.00
  -6   3  -3   -1.10    3.00
   6  -3   2   19.40    4.20
  -6   3  -2   25.20    4.70
  -6   3  -1   46.00    5.70
   6  -3   0  205.48   12.80
  -6   3   0  181.48   11.10
   6  -3  -1   47.60    6.30
   6  -3  -1   34.20    2.30
   6  -3  -1   38.80    2.50
  -6   3   1   34.30    4.70
   6  -3  -2   22.50    5.00
   6  -3  -2   26.80    2.50
   6  -3  -2   31.30    3.00
  -6   3   2   17.50    3.90
   6  -3  -3    2.00    2.00
   6  -3  -3    1.90    1.80
  -6   3   3    4.90    3.00
   6  -3  -4    0.00    2.10
   6  -3  -4    1.30    2.00
   6  -3  -4   -2.10    2.80
  -6   3   4    1.10    2.80
   6  -3  -5  171.48   10.90
   6  -3  -5  161.38    9.20
   6  -3  -5  192.18   10.00
  -6   3   5  154.18   10.20
   6  -3  -6    4.90    3.50
   6  -3  -6    1.10    2.60
   6  -3  -6   -0.10    2.40
  -6   3   6   -1.10    3.10
   6  -3  -7  316.27   16.80
   6  -3  -7  309.27   15.80
  -6   3   7  317.37   16.10
   6  -3  -8  107.19    8.60
   6  -3  -8   86.79    7.80
  -6   3   8   92.19    7.70
   6  -3  -9  141.39   10.40
  -6   3   9  185.08   11.90
  -6   3   9  154.68   10.30
   6  -3 -10  131.99   10.40
  -6   3  10  163.78   11.80
   6  -3 -11    8.30    4.50
  -6   3  11   18.90    5.40
  -6   3  11   12.80    4.20
   6  -3 -12   40.40    6.70
  -6   3  12   22.60    5.10
   6  -3 -13   95.89   10.00
  -6   3  13   86.89    8.40
   6  -3 -14   -2.50    5.00
  -6   3  14   -8.60    4.10
   6  -3 -15    1.90    5.40
  -6   3  15    0.50    4.60
   6  -3 -16    8.30    6.10
  -6   3  16    4.30    4.90
   6  -3 -17    6.80    6.40
  -6   3  17    5.70    5.30
  -5   3 -19    2.70    4.30
  -5   3 -19   -2.70    5.10
  -5   3 -18   -1.80    9.60
  -5   3 -18    9.60    4.60
  -5   3 -18   14.50    4.40
  -5   3 -17    1.00    4.10
  -5   3 -17   -0.30    5.20
  -5   3 -17    0.50    3.10
  -5   3 -16    1.80    3.10
  -5   3 -16    0.10    5.20
  -5   3 -16    9.80    4.10
  -5   3 -15   18.20    6.40
  -5   3 -15   14.40    3.90
  -5   3 -15   17.70    4.40
  -5   3 -14   -0.90    3.00
  -5   3 -14   -3.20    4.50
  -5   3 -14    3.90    3.00
  -5   3 -13    1.50    2.50
  -5   3 -13    7.80    4.80
  -5   3 -13    3.60    2.80
  -5   3 -12   55.69    8.10
  -5   3 -12   53.29    5.40
  -5   3 -12   57.99    5.30
  -5   3 -11   24.00    3.30
  -5   3 -11   22.10    3.50
  -5   3 -10  227.18   11.00
  -5   3 -10  233.58   11.30
  -5   3 -10  232.88   14.60
  -5   3  -9    7.90    1.80
  -5   3  -9   19.10    4.30
  -5   3  -9   10.60    2.20
  -5   3  -9    6.40    4.10
  -5   3  -8  254.07   11.30
  -5   3  -8  259.97   14.00
  -5   3  -8  254.07   11.10
  -5   3  -8  266.77   15.00
  -5   3  -7   59.89    7.00
  -5   3  -7   57.79    9.40
  -5   3  -6  113.19    8.20
  -5   3  -6  128.89    9.30
  -5   3  -5    5.50    3.30
  -5   3  -5   -1.20    2.30
   5  -3   4    1.60    2.60
  -5   3  -4    2.80    2.90
   5  -3   3   32.50    4.60
  -5   3  -3   27.00    4.20
   5  -3   2   51.09    5.30
  -5   3  -2   50.19    5.40
   5  -3   1   42.30    4.90
  -5   3  -1   34.30    4.40
   5  -3   0  623.44   25.40
   5  -3   0  601.64   28.00
   5  -3   0  641.74   25.50
  -5   3   0  632.44   27.90
   5  -3  -1   61.69    3.60
   5  -3  -1   47.40    3.10
   5  -3  -1   61.99    6.00
  -5   3   1   47.00    4.90
   5  -3  -2  585.84   24.70
   5  -3  -2  595.54   26.60
  -5   3   2  587.74   25.40
  -5   3   2  589.84   26.30
   5  -3  -3  100.29    5.90
   5  -3  -3  108.19    7.50
  -5   3   3  108.69    7.20
  -5   3   3  100.99    6.60
   5  -3  -4  105.29    7.50
   5  -3  -4  101.49    6.20
  -5   3   4   95.49    6.80
  -5   3   4  100.79    7.00
   5  -3  -5   -0.90    2.00
   5  -3  -5    2.60    2.70
  -5   3   5    0.80    2.50
  -5   3   5    2.90    2.60
   5  -3  -6   15.90    3.60
   5  -3  -6   12.70    3.10
  -5   3   6   15.50    3.70
  -5   3   6   11.00    3.30
   5  -3  -7   -0.30    2.70
   5  -3  -7   -0.40    2.60
  -5   3   7    2.90    2.90
  -5   3   7    0.10    2.90
   5  -3  -8   22.50    4.20
   5  -3  -8   21.20    6.60
  -5   3   8   22.70    4.10
  -5   3   8   21.00    4.50
   5  -3  -9   13.20    4.10
   5  -3  -9   17.60    4.20
  -5   3   9   18.30    4.90
  -5   3   9   11.70    3.80
   5  -3 -10  232.38   13.40
   5  -3 -10  236.18   13.70
  -5   3  10  219.78   12.60
  -5   3  10  220.48   14.00
   5  -3 -11   -1.80    3.80
   5  -3 -11    5.00    5.00
  -5   3  11   -0.80    3.10
  -5   3  11    4.50    4.10
   5  -3 -12  188.88   13.00
  -5   3  12  203.28   13.50
  -5   3  12  166.88   13.50
   5  -3 -13    0.10    5.10
  -5   3  13    6.10    4.00
   5  -3 -14    4.70    4.90
  -5   3  14   10.20    4.60
   5  -3 -15    0.10    4.90
  -5   3  15    3.60    4.40
   5  -3 -16   -1.30    5.50
  -5   3  16   -5.50    4.10
   5  -3 -17   -0.90    5.60
  -5   3  17    5.60    5.00
   5  -3 -18    1.00    6.00
  -5   3  18    0.40    4.60
  -4   3 -20   17.70    6.40
  -4   3 -20   14.20    6.60
  -4   3 -19    5.20    5.30
  -4   3 -19    8.20    6.00
  -4   3 -18    1.00    5.30
  -4   3 -18    6.30    5.00
  -4   3 -17  101.19   11.10
  -4   3 -17   99.99    9.90
  -4   3 -17  119.09   10.40
  -4   3 -16   -3.50    4.90
  -4   3 -16    2.50    4.40
  -4   3 -15   60.99    8.50
  -4   3 -15   54.89    6.70
  -4   3 -15   51.49    6.60
  -4   3 -14   17.50    4.40
  -4   3 -14   15.30    3.90
  -4   3 -14   10.10    5.00
  -4   3 -13    5.60    3.30
  -4   3 -13    1.20    4.30
  -4   3 -13    5.00    3.00
  -4   3 -12   27.10    6.00
  -4   3 -12   24.90    4.20
  -4   3 -12   28.10    4.90
  -4   3 -12   34.30    4.60
  -4   3 -11    3.10    4.10
  -4   3 -11   -0.30    2.50
  -4   3 -11    2.80    3.10
  -4   3 -11   -1.20    2.30
  -4   3 -10  115.89    7.20
  -4   3 -10  113.09    7.20
  -4   3 -10  115.99    9.30
  -4   3  -9   41.20    4.00
  -4   3  -9   43.10    4.20
  -4   3  -9   54.49    5.90
  -4   3  -9   53.89    6.80
  -4   3  -8    5.30    2.60
  -4   3  -8    4.00    1.80
  -4   3  -8    5.20    3.50
  -4   3  -8    3.70    1.90
  -4   3  -7   87.09    5.00
  -4   3  -7   94.79    5.10
  -4   3  -7   88.69    6.70
  -4   3  -7   86.69    7.40
  -4   3  -6  207.78    9.20
  -4   3  -6  201.68    9.20
  -4   3  -6  205.38   11.00
  -4   3  -6  221.48   12.00
  -4   3  -5   14.20    3.40
  -4   3  -5   14.20    1.20
  -4   3  -5   15.50    1.30
   4  -3   4  228.98   11.80
  -4   3  -4  220.28   11.90
   4  -3   3  258.37   13.20
  -4   3  -3  275.57   13.50
   4  -3   2  176.48    9.80
  -4   3  -2  186.98   10.00
   4  -3   1 2191.28   95.19
   4  -3   1 2261.97  117.09
  -4   3  -1 2239.88   98.09
  -4   3  -1 2394.56  117.89
   4  -3   0    2.10    1.00
   4  -3   0    2.70    2.10
  -4   3   0    4.20    1.20
  -4   3   0    2.80    2.00
   4  -3  -1  638.94   25.90
   4  -3  -1  617.14   27.30
  -4   3   1  652.83   27.30
  -4   3   1  594.44   26.20
   4  -3  -2   -0.40    2.00
   4  -3  -2    0.50    1.30
  -4   3   2   -0.20    1.80
  -4   3   2    2.30    1.60
   4  -3  -3  168.68    8.20
   4  -3  -3  163.98    9.10
  -4   3   3  161.78    8.90
  -4   3   3  159.98    8.70
   4  -3  -4  480.35   21.00
   4  -3  -4  477.25   21.70
  -4   3   4  482.85   21.50
  -4   3   4  475.75   21.50
   4  -3  -5 1319.47   54.59
   4  -3  -5 1268.57   54.09
  -4   3   5 1318.57   54.29
   4  -3  -6    3.30    2.50
   4  -3  -6    5.20    2.40
  -4   3   6    9.40    3.00
  -4   3   6   -0.20    2.20
   4  -3  -7   91.79    6.80
   4  -3  -7   73.49    6.50
  -4   3   7   94.69    6.60
  -4   3   7   97.09    7.20
   4  -3  -8   18.00    3.60
   4  -3  -8   16.80    3.80
  -4   3   8   15.40    3.40
  -4   3   8   23.50    4.40
   4  -3  -9  125.19    8.90
   4  -3  -9  133.89    9.30
  -4   3   9  139.79    8.60
  -4   3   9  138.99    9.70
   4  -3 -10   71.49    7.10
   4  -3 -10   80.19    7.60
  -4   3  10   85.59    8.20
  -4   3  10   65.89    6.40
   4  -3 -11  539.95   25.10
   4  -3 -11  504.75   25.50
  -4   3  11  508.55   24.40
  -4   3  11  561.84   26.40
   4  -3 -12   33.70    6.00
   4  -3 -12   19.20    4.70
  -4   3  12   26.30    5.40
  -4   3  12   10.10    3.80
   4  -3 -13  446.66   23.20
   4  -3 -14   30.70    6.50
  -4   3  14   15.10    4.60
   4  -3 -15   30.60    7.10
  -4   3  15   28.90    5.60
   4  -3 -16   -4.90    5.00
  -4   3  16    0.70    4.30
   4  -3 -17    5.40    6.10
  -4   3  17    3.90    4.80
   4  -3 -18    0.90    6.00
  -4   3  18    3.60    4.70
   4  -3 -19   -9.30    7.20
  -4   3  19   -5.00    4.30
   3  -3  21    8.70    6.00
  -3   3 -21    0.30    5.60
   3  -3  20    3.80    4.80
  -3   3 -20   16.40    6.40
   3  -3  19   -9.50    4.10
  -3   3 -19    1.40    5.10
   3  -3  18   37.00    6.70
  -3   3 -18   34.30    6.80
   3  -3  17   -2.10    3.90
  -3   3 -17    5.30    4.70
  -3   3 -17    7.10    4.20
   3  -3  16   66.09    7.70
  -3   3 -16   81.49    8.90
  -3   3 -16   81.49    8.50
  -3   3 -15    9.00    4.10
  -3   3 -15   16.50    4.90
   3  -3  14   -1.40    3.30
  -3   3 -14    3.10    3.40
  -3   3 -14    0.40    2.90
  -3   3 -14    4.00    3.80
  -3   3 -13   83.19    7.90
  -3   3 -13   80.29    7.40
  -3   3 -13   83.99    7.70
  -3   3 -12   79.19    7.30
  -3   3 -12   80.19    7.40
  -3   3 -11   45.90    5.10
  -3   3 -11   46.90    5.30
  -3   3 -11   54.49    5.50
  -3   3 -11   41.50    5.80
  -3   3 -10  214.68   11.70
  -3   3 -10  209.98   11.50
  -3   3 -10  225.38   11.90
  -3   3 -10  224.08   12.90
  -3   3  -9   15.00    3.10
  -3   3  -9    9.30    3.40
  -3   3  -9   14.30    2.90
  -3   3  -9   11.90    3.00
  -3   3  -8  506.05   22.60
  -3   3  -8  499.65   23.70
  -3   3  -8  501.65   22.30
  -3   3  -8  523.25   23.00
  -3   3  -7  724.73   32.60
  -3   3  -7  766.02   31.50
  -3   3  -7  714.03   31.80
  -3   3  -7  749.82   31.30
  -3   3  -6  573.24   24.90
  -3   3  -6  583.84   24.10
  -3   3  -6  552.14   25.40
  -3   3  -6  561.64   24.30
  -3   3  -5    7.00    1.50
  -3   3  -5    7.20    1.70
  -3   3  -5    4.80    2.20
   3  -3   4   77.19    5.20
  -3   3  -4   70.29    3.80
  -3   3  -4   74.49    5.40
   3  -3   3  302.57   14.10
   3  -3   3  304.67   12.70
  -3   3  -3  293.67   12.60
  -3   3  -3  292.37   14.10
   3  -3   2   68.99    3.60
  -3   3  -2   74.69    3.60
  -3   3  -2   66.99    4.90
   3  -3   1   91.69    5.70
   3  -3   1   90.79    4.50
  -3   3  -1   96.09    5.80
  -3   3  -1   94.99    4.60
   3  -3   0  476.85   21.50
   3  -3   0  491.95   20.40
  -3   3   0  488.15   20.50
  -3   3   0  501.25   21.40
   3  -3  -1   19.00    2.00
  -3   3   1   12.00    2.20
  -3   3   1   21.90    2.20
   3  -3  -2  482.75   21.20
   3  -3  -2  471.15   20.60
  -3   3   2  483.55   21.10
  -3   3   2  499.75   20.90
   3  -3  -3 1153.58   45.40
   3  -3  -3 1102.79   45.80
  -3   3   3 1084.39   45.50
  -3   3   3 1048.80   45.60
   3  -3  -4 1940.71   99.99
   3  -3  -4 1819.42   96.49
  -3   3   4 1957.10  103.49
  -3   3   4 1814.82   95.59
   3  -3  -5   21.70    3.20
   3  -3  -5   19.80    2.80
  -3   3   5   12.70    3.10
  -3   3   5   17.30    2.70
   3  -3  -6   13.20    2.80
  -3   3   6   11.20    2.70
  -3   3   6   12.60    2.60
   3  -3  -7   80.09    6.00
   3  -3  -7   64.49    5.60
  -3   3   7   75.89    6.10
  -3   3   7   69.69    5.50
   3  -3  -8   18.00    3.40
   3  -3  -8   20.60    3.80
  -3   3   8   26.10    4.40
  -3   3   8   23.90    3.70
   3  -3  -9   60.89    5.90
   3  -3  -9   69.29    6.70
  -3   3   9   64.89    6.70
  -3   3   9   62.59    5.80
   3  -3 -10  122.89    8.40
   3  -3 -10   95.99    8.40
  -3   3  10  123.99    9.00
  -3   3  10  118.29    7.90
   3  -3 -11    4.80    3.40
   3  -3 -11    4.80    3.70
  -3   3  11    1.50    2.90
  -3   3  11    2.70    3.70
   3  -3 -12   11.50    4.50
   3  -3 -12    7.30    4.00
  -3   3  12    9.30    4.10
  -3   3  12   13.10    4.00
   3  -3 -13  105.39    9.80
   3  -3 -13   91.59    9.10
  -3   3  13  104.59    8.40
  -3   3  13  103.79    9.60
   3  -3 -14  125.19   11.20
  -3   3  14  103.79    9.00
   3  -3 -15   23.50    6.40
  -3   3  15   20.50    5.20
   3  -3 -16   21.30    6.60
  -3   3  16   12.10    5.00
   3  -3 -17    4.60    5.70
  -3   3  17   12.30    5.10
   3  -3 -18   -3.90    5.80
  -3   3  18    5.00    5.10
   3  -3 -19    3.70    6.60
  -3   3  19    3.40    5.50
   3  -3 -20   -7.10    6.10
  -3   3  20   -2.40    5.40
   2  -3  22   -1.90    5.50
  -2   3 -22   -1.70    6.00
   2  -3  21   -7.00    4.10
  -2   3 -21    0.70    6.20
   2  -3  20    1.30    4.50
  -2   3 -20    2.80    6.00
   2  -3  19   -2.00    4.40
  -2   3 -19    4.20    5.60
   2  -3  18   12.70    5.00
  -2   3 -18   18.30    6.20
   2  -3  17    9.30    4.60
  -2   3 -17    3.70    4.80
   2  -3  16    5.90    4.00
  -2   3 -16    3.80    4.00
  -2   3 -16    2.40    4.40
   2  -3  15    3.10    3.50
  -2   3 -15   -0.30    4.10
  -2   3 -15   -0.90    3.10
   2  -3  14   13.20    3.80
  -2   3 -14   13.60    4.60
  -2   3 -14   25.90    4.60
  -2   3 -14   10.00    4.20
   2  -3  13   59.69    6.40
  -2   3 -13   72.79    6.80
  -2   3 -13   64.29    7.00
  -2   3 -13   66.79    7.50
   2  -3  12   13.90    3.50
  -2   3 -12   17.10    3.50
  -2   3 -12   22.30    4.40
  -2   3 -12   14.30    4.00
   2  -3  11   41.20    4.50
  -2   3 -11   29.00    4.60
  -2   3 -11   33.10    4.30
  -2   3 -11   40.40    4.90
   2  -3  10  887.01   38.90
  -2   3 -10  911.21   39.40
  -2   3 -10  942.91   39.80
  -2   3 -10  903.91   38.90
  -2   3  -9  916.11   38.30
  -2   3  -9  902.31   39.00
  -2   3  -9  881.51   39.60
  -2   3  -8  489.55   22.10
  -2   3  -8  495.95   22.40
  -2   3  -8  534.25   22.80
  -2   3  -8  481.25   22.80
  -2   3  -7  204.08   10.30
  -2   3  -7  191.98   10.70
  -2   3  -7  207.28   10.40
  -2   3  -7  222.08   10.80
  -2   3  -6  158.48    8.30
  -2   3  -6  150.78    7.70
  -2   3  -6  134.59    7.60
  -2   3  -6  145.59    8.00
   2  -3   5   19.60    2.40
  -2   3  -5   26.80    2.80
  -2   3  -5   22.60    3.00
  -2   3  -5   20.60    2.50
   2  -3   4 1078.59   44.10
  -2   3  -4 1052.19   44.30
   2  -3   3  513.85   21.40
   2  -3   3  497.45   21.00
  -2   3  -3  495.25   21.50
  -2   3  -3  489.65   21.00
   2  -3   2 1540.35   74.79
   2  -3   2 1568.14   76.79
  -2   3  -2 1508.95   74.39
  -2   3  -2 1550.64   77.79
   2  -3   1  757.02   31.30
   2  -3   1  748.43   31.70
  -2   3  -1  776.22   31.40
  -2   3  -1  759.72   31.80
   2  -3   0  934.71   50.29
   2  -3   0  879.41   50.29
  -2   3   0  908.01   50.59
  -2   3   0  911.51   50.19
   2  -3  -1 2676.33  125.29
   2  -3  -1 2679.93  126.69
  -2   3   1 2724.33  125.39
  -2   3   1 2972.20  128.19
   2  -3  -2 3047.30  136.59
   2  -3  -2 2892.71  138.59
  -2   3   2 2938.81  135.99
  -2   3   2 3195.48  140.69
   2  -3  -3 1790.82   89.59
   2  -3  -3 1796.32   93.79
  -2   3   3 1981.40   96.59
  -2   3   3 1757.22   88.99
   2  -3  -4 3214.68  143.19
   2  -3  -4 2587.44  145.79
  -2   3   4 2912.51  141.89
  -2   3   4 2902.21  134.19
   2  -3  -5 1366.26   56.39
   2  -3  -6    8.20    2.30
  -2   3   6   10.00    2.50
  -2   3   6   18.70    3.10
   2  -3  -7   88.49    6.40
   2  -3  -7   82.79    6.00
  -2   3   7   86.39    5.90
  -2   3   7   82.99    6.20
   2  -3  -8  960.50   40.10
   2  -3  -8  944.21   40.60
  -2   3   8  913.11   40.40
  -2   3   8  927.71   39.80
   2  -3  -9  456.15   21.00
   2  -3  -9  428.36   21.30
  -2   3   9  452.95   20.80
  -2   3   9  464.45   21.60
   2  -3 -10   92.39    7.10
   2  -3 -10   94.39    7.70
  -2   3  10   84.89    6.90
  -2   3  10   97.49    7.60
   2  -3 -11    0.30    2.90
   2  -3 -11    3.00    3.50
  -2   3  11    1.00    3.00
  -2   3  11   -4.80    2.70
   2  -3 -12   28.40    5.40
   2  -3 -12   33.70    4.80
  -2   3  12   24.60    4.40
  -2   3  12   32.20    5.30
   2  -3 -13   12.80    4.90
   2  -3 -13   13.70    4.40
  -2   3  13    8.70    4.20
  -2   3  13   10.60    4.10
  -2   3  14  191.48   18.40
   2  -3 -15  118.09   11.00
  -2   3  15   80.29    8.10
   2  -3 -16   21.30    6.70
  -2   3  16   15.90    5.10
   2  -3 -17    1.40    5.30
  -2   3  17   -1.30    4.60
   2  -3 -18    5.70    6.00
  -2   3  18    3.40    5.30
   2  -3 -19   -7.10    5.60
  -2   3  19    9.60    5.90
   2  -3 -20    6.60    6.40
  -2   3  20   -2.90    5.30
   1  -3  22    6.70    5.00
  -1   3 -22   -9.40    5.80
   1  -3  21   13.70    5.50
  -1   3 -21   14.10    6.90
   1  -3  20    6.40    4.50
  -1   3 -20   11.30    6.40
   1  -3  19   11.10    4.50
  -1   3 -19    8.60    6.20
   1  -3  18    6.70    4.20
  -1   3 -18    0.10    4.90
   1  -3  17  152.78   10.60
  -1   3 -17  144.09   14.60
   1  -3  16    3.30    3.40
  -1   3 -16   -0.10    3.60
  -1   3 -16   -2.70    3.90
  -1   3 -16    2.20    3.50
   1  -3  15  247.78   13.90
  -1   3 -15  261.87   16.00
  -1   3 -15  260.77   15.50
   1  -3  14    9.80    3.50
  -1   3 -14   11.80    3.70
  -1   3 -14    0.40    3.90
  -1   3 -14   16.00    4.60
   1  -3  13   28.70    4.10
  -1   3 -13   28.40    5.00
  -1   3 -13   27.20    4.20
  -1   3 -13   27.40    5.30
   1  -3  12   38.50    4.70
  -1   3 -12   44.80    5.10
  -1   3 -12   35.20    5.50
  -1   3 -12   48.40    5.80
   1  -3  11  345.47   16.00
  -1   3 -11  345.17   16.00
  -1   3 -11  331.47   16.90
  -1   3 -11  305.57   17.20
   1  -3  10   -1.30    1.90
  -1   3 -10    0.30    2.70
  -1   3 -10    1.40    1.90
  -1   3 -10    3.10    2.40
   1  -3   9   62.49    4.80
  -1   3  -9   62.19    5.90
  -1   3  -9   58.89    4.80
  -1   3  -9   70.99    6.20
   1  -3   8  127.69    6.90
  -1   3  -8  124.49    8.10
  -1   3  -8  130.59    7.90
  -1   3  -8  118.29    6.90
  -1   3  -7  717.83   29.70
  -1   3  -7  672.03   30.80
  -1   3  -7  721.33   30.60
   1  -3   6  281.27   13.30
  -1   3  -6  275.47   12.90
  -1   3  -6  281.27   13.30
  -1   3  -6  279.07   12.60
   1  -3   5 1542.25   84.09
  -1   3  -5 1495.75   73.19
  -1   3  -5 1491.25   75.89
  -1   3  -5 1555.04   84.89
   1  -3   4   21.80    2.50
  -1   3  -4   25.70    2.40
  -1   3  -4   31.40    3.00
   1  -3   3  315.77   14.20
   1  -3   3  322.77   13.80
  -1   3  -3  324.97   14.30
  -1   3  -3  319.27   13.90
   1  -3   2   41.80    3.20
   1  -3   2   55.09    3.10
  -1   3  -2   54.19    3.50
  -1   3  -2   48.90    3.00
   1  -3   1  562.74   23.10
   1  -3   1  537.75   23.40
  -1   3  -1  566.44   23.50
   1  -3   0  136.89    6.70
   1  -3   0  135.09    6.30
  -1   3   0  130.29    6.30
  -1   3   0  134.59    6.70
   1  -3  -1   75.79    4.10
   1  -3  -1   68.59    4.40
  -1   3   1   71.59    4.10
  -1   3   1   77.49    4.40
   1  -3  -2  118.59    6.00
   1  -3  -2  115.29    6.30
  -1   3   2  123.39    6.40
  -1   3   2  118.09    6.00
   1  -3  -3  689.23   27.60
   1  -3  -3  665.83   27.10
  -1   3   3  624.94   27.10
  -1   3   3  599.14   27.30
   1  -3  -4   21.10    2.50
   1  -3  -4   21.10    2.80
  -1   3   4   17.60    2.40
  -1   3   4   15.40    2.50
   1  -3  -5 1009.00   40.10
  -1   3   5  913.61   39.90
  -1   3   5  922.91   39.60
   1  -3  -6    1.90    1.90
   1  -3  -6    1.00    1.70
  -1   3   6    4.00    2.10
   1  -3  -7  244.88   12.60
   1  -3  -7  276.97   13.30
  -1   3   7  239.08   12.60
  -1   3   7  268.07   13.10
   1  -3  -8   17.90    3.20
   1  -3  -8   17.00    3.50
  -1   3   8   20.50    3.60
  -1   3   8   22.60    3.60
   1  -3  -9   26.20    3.90
   1  -3  -9   20.40    4.10
  -1   3   9   25.60    4.40
  -1   3   9   24.00    3.80
   1  -3 -10   47.50    5.70
   1  -3 -10   50.89    5.40
  -1   3  10   51.49    5.70
  -1   3  10   50.09    5.90
   1  -3 -11   -0.60    3.00
   1  -3 -11    2.50    2.90
  -1   3  11    4.40    3.10
  -1   3  11    3.50    3.00
   1  -3 -12   73.59    7.90
   1  -3 -12   95.99    7.80
  -1   3  12   95.39    8.10
  -1   3  12   92.99    8.10
   1  -3 -13    2.50    4.00
   1  -3 -13    2.70    3.30
  -1   3  13   -0.10    3.60
  -1   3  13    2.80    3.60
   1  -3 -14   43.50    8.00
  -1   3  14   37.90    8.50
   1  -3 -15    3.70    4.70
  -1   3  15   -3.40    4.10
   1  -3 -16   38.50    7.10
  -1   3  16   26.30    5.90
   1  -3 -17   11.60    5.90
  -1   3  17   -1.00    4.70
   1  -3 -18    2.40    5.70
  -1   3  18   10.00    5.50
   1  -3 -19    0.20    5.70
  -1   3  19    3.20    5.10
   1  -3 -20    3.80    6.90
  -1   3  20    7.20    6.20
   0  -3  22    3.40    4.50
   0   3 -22   15.90    8.60
   0  -3  21    5.00    4.30
   0   3 -21   -7.30    5.30
   0  -3  20   -1.40    3.90
   0   3 -20    0.00    5.40
   0  -3  19    1.30    3.70
   0   3 -19    2.40    5.70
   0  -3  18  128.99    9.50
   0   3 -18  105.09   11.30
   0  -3  17   -4.10    3.10
   0   3 -17    2.20    3.50
   0   3 -17   -3.90    4.50
   0  -3  16  132.89    9.60
   0   3 -16  151.98   12.50
   0   3 -16  149.49   11.50
   0  -3  15   -0.20    2.80
   0   3 -15    0.30    4.10
   0   3 -15    5.20    3.80
   0   3 -15    2.70    3.20
   0  -3  14   15.20    3.40
   0   3 -14   18.70    5.50
   0   3 -14   24.10    5.00
   0   3 -14   19.50    4.10
   0  -3  13    1.20    2.40
   0   3 -13   -1.60    2.50
   0   3 -13   -2.50    2.90
   0   3 -13   -5.50    3.20
   0  -3  12  569.14   25.80
   0   3 -12  617.94   28.20
   0   3 -12  579.24   27.60
   0   3 -12  585.34   26.00
   0   3 -11    1.50    3.10
   0   3 -11    4.10    3.00
   0   3 -11    2.00    2.20
   0  -3  10  359.06   16.50
   0   3 -10  356.46   16.70
   0   3 -10  382.86   18.70
   0   3 -10  362.56   18.10
   0  -3   9   -1.00    1.50
   0   3  -9   -0.90    1.60
   0   3  -9    0.20    2.50
   0   3  -9    1.30    2.50
   0  -3   8  529.15   22.30
   0   3  -8  520.65   22.40
   0   3  -8  487.65   24.00
   0   3  -8  548.95   23.90
   0  -3   7    2.60    1.30
   0  -3   7    1.00    2.00
   0   3  -7    1.20    1.30
   0   3  -7    0.30    1.90
   0  -3   6 7127.29  322.67
   0  -3   6 7330.27  301.07
   0   3  -6 7319.77  326.17
   0   3  -6 7311.07  302.07
   0  -3   5    0.20    1.60
   0   3  -5   -3.00    1.40
   0   3  -5    6.00    1.20
   0   3  -5   -0.40    0.80
   0  -3   4 6401.56  286.17
   0   3  -4 6320.17  266.37
   0   3  -4 6703.83  287.57
   0   3  -4 6627.54  267.37
   0  -3   3    0.60    1.40
   0   3  -3    0.60    1.50
   0   3  -3    1.40    0.60
   0  -3   2  672.93   27.30
   0  -3   1    1.40    0.60
   0  -3   1    0.20    1.20
   0   3  -1    2.20    1.30
   0   3  -1   -0.50    0.60
   0  -3   0 5016.60  226.98
   0  -3   0 5032.10  212.68
   0   3   0 5400.06  228.68
   0   3   0 5178.18  214.18
   0  -3  -1    0.40    0.80
   0  -3  -1    1.20    1.30
   0   3   1    0.20    1.20
   0   3   1   -0.50    1.00
   0  -3  -2 1531.65   86.99
   0  -3  -2 1693.03   76.89
   0   3   2 1660.53   78.49
   0   3   2 1632.24   86.99
   0  -3  -3   -0.30    1.40
   0  -3  -3    0.90    1.10
   0   3   3   -2.00    1.20
   0   3   3    9.40    2.10
   0  -3  -4 1556.64   92.79
   0  -3  -4 1776.92   85.39
   0   3   4 1805.42   87.89
   0  -3  -5    2.10    1.80
   0  -3  -5    0.10    1.70
   0   3   5   -0.30    1.80
   0   3   5    1.60    1.80
   0  -3  -6 3082.29  145.99
   0  -3  -6 3132.49  157.38
   0   3   6 3102.39  156.88
   0  -3  -7   -2.90    1.90
   0  -3  -7   -0.80    2.10
   0   3   7   -0.80    2.10
   0   3   7   -0.70    2.10
   0  -3  -8  952.80   41.00
   0  -3  -8  954.90   41.50
   0   3   8 1020.30   41.50
   0   3   8  924.31   41.30
   0  -3  -9   -2.60    2.10
   0  -3  -9   -0.60    2.80
   0   3   9    1.40    2.80
   0   3   9    0.70    2.70
   0  -3 -10   37.10    5.20
   0  -3 -10   38.20    4.80
   0   3  10   26.40    4.60
   0   3  10   40.50    5.20
   0  -3 -11    1.80    3.40
   0  -3 -11    1.80    2.80
   0   3  11    3.90    3.60
   0   3  11    1.50    3.10
   0  -3 -12  185.48   12.20
   0  -3 -12  187.28   11.40
   0   3  12  168.88   11.60
   0   3  12  196.28   12.00
   0  -3 -13    0.40    3.20
   0  -3 -13   -1.50    3.80
   0   3  13   -5.30    3.30
   0   3  13   -2.20    3.30
   0   3  14    7.70    4.50
   0  -3 -15    3.20    4.60
   0   3  15   -2.80    4.30
   0  -3 -16    1.90    5.00
   0   3  16   -1.10    4.80
   0  -3 -17   -5.80    5.20
   0   3  17    2.10    5.30
   0  -3 -18   20.20    7.50
   0   3  18   16.30    6.30
   0  -3 -19   -0.20    6.20
   0   3  19    2.50    5.60
   0  -3 -20    8.80    7.10
   0   3  20    8.20    6.10
  -1  -3  22    1.30    4.30
   1   3 -22   -1.70    6.20
  -1  -3  21    2.70    4.10
   1   3 -21   -6.30    6.20
  -1  -3  20   38.90    6.10
   1   3 -20   20.00    7.10
   1   3 -19   13.70    6.60
  -1  -3  18    7.50    3.90
   1   3 -18   10.70    4.20
   1   3 -18    3.50    5.40
  -1  -3  17   16.00    4.10
   1   3 -17   20.00    6.40
   1   3 -17   23.00    4.70
  -1  -3  16    8.90    3.40
   1   3 -16   -1.80    4.50
   1   3 -16   16.50    4.00
  -1  -3  15   81.09    6.70
   1   3 -15   82.09    7.00
   1   3 -15   68.49    8.50
  -1  -3  14  200.98   10.90
   1   3 -14  214.48   14.00
   1   3 -14  199.08   13.20
   1   3 -14  196.68   11.30
  -1  -3  13  553.74   24.30
   1   3 -13  527.05   26.60
   1   3 -13  593.84   27.60
   1   3 -13  535.15   24.60
  -1  -3  12   39.20    5.00
   1   3 -12   30.60    5.60
   1   3 -12   37.90    4.20
   1   3 -12   35.60    5.50
  -1  -3  11    8.80    2.30
   1   3 -11    7.00    3.50
   1   3 -11    5.40    3.20
   1   3 -11    7.60    2.90
  -1  -3  10   -1.10    1.60
   1   3 -10    4.40    3.50
   1   3 -10    0.50    1.80
   1   3 -10   -0.10    2.50
  -1  -3   9  141.99    7.20
   1   3  -9  145.89    9.30
   1   3  -9  152.08    9.80
   1   3  -9  135.69    7.30
  -1  -3   8    7.60    1.60
   1   3  -8    4.40    2.60
   1   3  -8    6.10    1.60
  -1  -3   7   85.29    6.70
  -1  -3   7   91.39    4.70
   1   3  -7   94.79    4.80
   1   3  -7   89.69    6.70
  -1  -3   6   31.00    2.10
  -1  -3   6   39.30    5.10
   1   3  -6   28.20    3.90
   1   3  -6   30.50    2.10
  -1  -3   5  708.53   31.70
   1   3  -5  752.12   29.60
   1   3  -5  732.03   31.70
  -1  -3   4  458.45   21.40
   1   3  -4  509.25   23.30
  -1  -3   3 1688.03   93.39
   1   3  -3 1636.44   92.69
  -1  -3   2   35.20    3.60
   1   3  -2   41.50    3.90
  -1  -3   1   41.50    3.70
  -1  -3   1   47.10    2.30
   1   3  -1   51.69    3.90
   1   3  -1   43.90    2.50
  -1  -3   0   74.99    3.80
  -1  -3   0   68.99    4.90
   1   3   0   83.19    5.00
   1   3   0   78.09    4.00
  -1  -3  -1    0.60    1.60
  -1  -3  -1    0.40    1.00
   1   3   1    0.80    1.20
   1   3   1    1.00    1.40
  -1  -3  -2   44.90    4.00
  -1  -3  -2   49.00    3.30
   1   3   2   46.30    3.60
   1   3   2   49.10    4.00
  -1  -3  -3    9.10    1.90
  -1  -3  -3    8.20    2.20
   1   3   3    6.70    2.00
   1   3   3   10.00    2.10
  -1  -3  -4    1.20    1.90
  -1  -3  -4    0.60    1.60
   1   3   4   -1.30    1.60
   1   3   4   -3.00    1.60
  -1  -3  -5  709.43   31.70
  -1  -3  -5  762.32   31.20
   1   3   5  752.12   31.60
   1   3   5  708.03   31.60
  -1  -3  -6    6.00    2.40
  -1  -3  -6    5.50    2.60
   1   3   6    7.20    2.60
   1   3   6    8.10    2.60
  -1  -3  -7  431.96   20.10
  -1  -3  -7  441.96   19.60
   1   3   7  438.96   20.00
   1   3   7  398.06   19.90
  -1  -3  -8    0.10    2.50
  -1  -3  -8    3.20    2.90
   1   3   8    2.40    3.10
   1   3   8    0.30    2.30
  -1  -3  -9    1.80    3.00
  -1  -3  -9    3.20    2.80
   1   3   9   -0.10    2.40
   1   3   9    1.80    3.00
  -1  -3 -10  118.09    8.90
  -1  -3 -10  113.29    8.30
   1   3  10  124.19    9.20
   1   3  10  120.89    8.60
  -1  -3 -11    0.70    3.20
  -1  -3 -11   -0.30    3.20
   1   3  11    0.30    3.70
  -1  -3 -12   19.20    4.70
  -1  -3 -12   21.90    4.90
   1   3  12   24.70    5.50
   1   3  12   25.50    5.00
  -1  -3 -13   40.50    6.80
   1   3  13   59.79    7.90
   1   3  13   47.40    6.60
  -1  -3 -14   13.80    5.30
   1   3  14   15.80    5.40
  -1  -3 -15   12.60    5.50
   1   3  15   24.80    6.00
  -1  -3 -16    8.10    5.40
   1   3  16    9.50    5.40
  -1  -3 -17    1.30    5.30
   1   3  17   -7.40    5.00
  -1  -3 -18   21.80    7.40
   1   3  18    7.30    5.90
  -1  -3 -19    7.50    6.40
   1   3  19   -0.60    5.60
  -2  -3  21    3.60    4.00
   2   3 -21   -0.30    6.00
  -2  -3  20   14.40    4.50
   2   3 -20   17.60    7.60
  -2  -3  19   11.80    4.20
   2   3 -19   25.00    7.10
  -2  -3  18   29.80    5.00
   2   3 -18   42.70    8.50
   2   3 -18   44.40    5.80
  -2  -3  17   17.20    4.00
   2   3 -17    7.60    6.00
  -2  -3  16  207.48   11.50
   2   3 -16  216.38   12.20
   2   3 -16  196.78   15.00
  -2  -3  15  225.28   12.10
   2   3 -15  224.98   12.60
   2   3 -15  258.87   16.20
  -2  -3  14  562.84   24.90
   2   3 -14  540.45   25.30
   2   3 -14  600.64   29.00
  -2  -3  13  739.33   31.60
   2   3 -13  715.83   34.30
   2   3 -13  747.43   35.00
   2   3 -13  741.73   31.90
  -2  -3  12  638.24   27.40
   2   3 -12  623.14   27.70
   2   3 -12  652.83   31.00
   2   3 -12  647.64   30.30
  -2  -3  11   17.90    2.70
   2   3 -11   12.90    4.50
   2   3 -11   11.10    3.90
   2   3 -11   19.60    3.00
  -2  -3  10  323.67   14.10
   2   3 -10  306.47   17.10
   2   3 -10  304.17   16.70
   2   3 -10  320.47   14.30
  -2  -3   9  559.84   22.90
   2   3  -9  520.15   25.90
   2   3  -9  542.85   25.60
   2   3  -9  539.75   23.00
  -2  -3   8 1399.66   57.49
  -2  -3   8 1459.95   60.59
   2   3  -8 1393.96   57.59
   2   3  -8 1436.96   60.29
  -2  -3   7  497.25   20.20
  -2  -3   7  489.65   23.00
   2   3  -7  475.85   20.30
   2   3  -7  492.65   22.90
  -2  -3   6  158.38    9.40
  -2  -3   6  144.99    6.50
   2   3  -6  150.88    6.70
   2   3  -6  168.18    9.50
  -2  -3   5   69.49    6.00
  -2  -3   5   80.29    3.20
   2   3  -5   72.59    5.90
   2   3  -5   69.99    3.40
  -2  -3   4 1236.78   53.59
   2   3  -4 1315.67   53.69
  -2  -3   3 3341.27  133.99
  -2  -3   3 3069.09  133.89
   2   3  -3 3597.54  166.98
  -2  -3   2 5427.66  251.07
  -2  -3   2 5303.57  223.78
  -2  -3   2 5372.76  223.68
   2   3  -2 5896.11  253.47
  -2  -3   1 1155.18   46.80
  -2  -3   1 1175.18   46.90
  -2  -3   1 1131.49   48.30
   2   3  -1 1159.18   48.30
  -2  -3   0  130.49    7.60
  -2  -3   0  128.39    6.40
   2   3   0  149.99    7.80
  -2  -3  -1   49.20    3.40
  -2  -3  -1   56.29    4.90
   2   3   1   49.70    4.30
   2   3   1   46.40    3.40
  -2  -3  -2   91.19    5.30
  -2  -3  -2   90.89    6.80
   2   3   2   98.29    5.50
   2   3   2   89.29    5.90
  -2  -3  -3  292.97   13.20
  -2  -3  -3  282.67   13.80
   2   3   3  277.27   13.50
   2   3   3  296.77   13.90
  -2  -3  -4  726.03   31.20
  -2  -3  -4  745.73   31.80
   2   3   4  700.13   31.40
   2   3   4  751.62   31.60
  -2  -3  -5  202.48   10.30
  -2  -3  -5  208.78   10.90
   2   3   5  197.28   10.70
   2   3   5  189.78   10.50
  -2  -3  -6    1.70    2.40
  -2  -3  -6   -1.10    2.00
   2   3   6    2.30    2.20
   2   3   6    0.20    2.50
  -2  -3  -7  171.58   10.20
  -2  -3  -7  167.78    9.80
   2   3   7  170.38   10.40
   2   3   7  183.58   10.10
  -2  -3  -8  287.47   14.50
  -2  -3  -8  280.47   14.80
   2   3   8  270.17   15.00
   2   3   8  302.17   14.80
  -2  -3  -9   18.10    4.00
  -2  -3  -9   14.70    3.70
   2   3   9   11.80    3.90
   2   3   9   21.40    4.20
  -2  -3 -10   30.60    5.10
  -2  -3 -10   46.00    5.50
   2   3  10   34.40    5.50
   2   3  10   47.60    5.60
  -2  -3 -11   60.59    6.90
  -2  -3 -11   75.49    7.30
   2   3  11   68.29    7.20
   2   3  11   63.69    7.60
  -2  -3 -12   35.40    6.20
   2   3  12   42.00    5.80
   2   3  12   44.60    6.80
  -2  -3 -13   -0.90    4.10
   2   3  13    0.10    4.50
  -2  -3 -14   11.80    5.00
   2   3  14   18.40    6.20
  -2  -3 -15   -0.10    4.50
   2   3  15    6.60    5.40
  -2  -3 -16   -0.70    4.90
   2   3  16   -0.30    5.30
  -2  -3 -17    4.10    5.40
   2   3  17    4.80    5.90
  -2  -3 -18   -0.90    5.80
   2   3  18   -7.70   10.00
  -3  -3  20   12.80    4.30
   3   3 -20   15.10    7.40
  -3  -3  19    2.00    3.40
   3   3 -19    4.70    6.10
  -3  -3  18   29.20    4.70
   3   3 -18   20.80    7.70
   3   3 -18   31.40    5.00
  -3  -3  17    4.40    3.30
   3   3 -17   12.00    3.80
   3   3 -17   -2.30    5.60
  -3  -3  16    1.00    2.70
   3   3 -16    6.60    5.50
   3   3 -16   -2.60    2.80
  -3  -3  15   35.80    4.30
   3   3 -15   34.70    4.70
   3   3 -15   33.60    7.10
  -3  -3  14   62.09    5.20
   3   3 -14   61.89    5.60
   3   3 -14   46.00    8.10
  -3  -3  13    5.80    2.50
   3   3 -13    8.10    5.00
   3   3 -13    9.90    2.90
  -3  -3  12  528.25   22.90
   3   3 -12  555.74   26.40
   3   3 -12  523.15   23.30
   3   3 -12  506.45   26.60
  -3  -3  11  171.78    8.80
   3   3 -11  173.18    9.10
   3   3 -11  187.68   12.80
   3   3 -11  188.28   12.10
  -3  -3  10   68.59    4.40
   3   3 -10   65.49    4.60
   3   3 -10   53.49    7.10
  -3  -3   9    6.40    1.70
   3   3  -9    3.30    3.60
   3   3  -9    5.20    1.80
   3   3  -9    5.30    3.60
  -3  -3   8   61.29    3.70
   3   3  -8   67.59    6.80
   3   3  -8   62.59    4.00
  -3  -3   7   74.39    4.00
  -3  -3   7   83.89    7.80
   3   3  -7   84.49    7.10
   3   3  -7   74.49    4.30
  -3  -3   6    8.00    1.30
  -3  -3   6    4.70    2.90
   3   3  -6    3.90    3.00
   3   3  -6    9.60    1.50
  -3  -3   5   88.99    4.40
  -3  -3   5   99.69    7.40
  -3  -3   5   91.29    4.30
   3   3  -5   91.79    7.00
  -3  -3   4   50.29    3.00
  -3  -3   4   51.79    5.50
   3   3  -4   59.49    5.60
  -3  -3   3   22.00    4.00
  -3  -3   3   25.80    2.10
  -3  -3   3   27.80    2.20
   3   3  -3   28.30    4.00
  -3  -3   2 1173.88   47.90
  -3  -3   2 1216.98   47.90
  -3  -3   2 1121.89   49.80
   3   3  -2 1196.48   49.70
  -3  -3   1  293.07   12.90
  -3  -3   1  261.77   14.20
  -3  -3   1  303.67   12.90
   3   3  -1  307.47   14.40
  -3  -3   0   88.39    6.70
  -3  -3   0   97.09    5.60
  -3  -3   0  112.39    5.70
   3   3   0  113.19    6.90
  -3  -3  -1   79.19    5.10
  -3  -3  -1   76.69    4.80
  -3  -3  -1   65.09    5.60
   3   3   1   71.39    5.60
  -3  -3  -2   12.50    2.30
  -3  -3  -2   11.10    2.80
  -3  -3  -2   10.60    2.50
   3   3   2   13.90    3.00
  -3  -3  -3   74.19    5.20
  -3  -3  -3   72.09    5.80
   3   3   3   64.39    5.10
   3   3   3   64.89    5.50
  -3  -3  -4    3.10    2.20
  -3  -3  -4    5.40    2.70
   3   3   4    1.60    2.20
   3   3   4    3.50    2.30
  -3  -3  -5   -2.00    2.10
  -3  -3  -5    0.10    2.30
   3   3   5   -0.60    2.30
   3   3   5    0.30    2.50
  -3  -3  -6    1.10    2.50
  -3  -3  -6   -0.20    2.70
   3   3   6    2.60    2.90
   3   3   6    4.00    2.60
  -3  -3  -7   38.10    4.80
  -3  -3  -7   41.50    5.20
   3   3   7   37.50    4.70
   3   3   7   31.50    5.00
  -3  -3  -8  164.58    9.90
  -3  -3  -8  156.28   10.20
   3   3   8  169.18   10.00
   3   3   8  138.39   10.20
  -3  -3  -9  207.08   12.40
  -3  -3  -9  200.58   12.00
   3   3   9  228.38   12.20
   3   3   9  191.28   12.60
  -3  -3 -10    1.70    3.60
  -3  -3 -10    2.10    3.50
   3   3  10    6.60    4.20
   3   3  10    8.70    3.70
  -3  -3 -11    1.00    3.60
   3   3  11    6.10    3.70
   3   3  11   -1.30    4.10
  -3  -3 -12    1.10    3.90
   3   3  12   -0.30    3.20
   3   3  12    4.70    4.50
  -3  -3 -13   -5.20    3.70
   3   3  13   -1.60    4.30
  -3  -3 -14    6.20    4.70
   3   3  14    1.40    5.20
  -3  -3 -15    1.60    4.70
   3   3  15    0.50    5.20
  -3  -3 -16   -1.60    5.00
   3   3  16    3.60    5.40
  -3  -3 -17    0.80    4.90
   3   3  17    1.00    6.80
  -4  -3  19   -0.30    3.20
   4   3 -19   -3.60    6.30
  -4  -3  18   -5.20    2.90
   4   3 -18    2.00    6.20
   4   3 -18   -0.30    3.10
  -4  -3  17  218.78   12.00
   4   3 -17  209.18   16.80
   4   3 -17  219.28   12.50
  -4  -3  16   53.69    5.20
   4   3 -16   52.09    5.60
   4   3 -16   37.70    7.80
  -4  -3  15   53.49    5.00
   4   3 -15   56.49    5.70
   4   3 -15   49.40    8.40
  -4  -3  14    2.00    2.40
   4   3 -14   -0.10    2.50
   4   3 -14   -1.50    4.90
  -4  -3  13  219.18   10.70
   4   3 -13  203.08   11.20
   4   3 -13  218.28   15.10
  -4  -3  12    0.50    2.10
   4   3 -12    3.70    2.50
   4   3 -12    5.00    5.80
  -4  -3  11 1507.15   60.49
   4   3 -11 1435.76   60.99
   4   3 -11 1496.05   64.99
  -4  -3  10   90.19    5.50
   4   3 -10  130.09   11.30
   4   3 -10   81.19    5.80
   4   3 -10  112.39    9.20
  -4  -3   9  974.70   39.70
   4   3  -9  995.80   43.30
   4   3  -9  962.10   43.80
   4   3  -9  933.71   40.10
  -4  -3   8    1.70    1.50
   4   3  -8    4.70    4.20
   4   3  -8    0.50    1.60
  -4  -3   7  199.68   12.70
  -4  -3   7  215.98    9.10
   4   3  -7  175.18    9.40
   4   3  -7  216.08   12.40
  -4  -3   6   68.49    7.30
  -4  -3   6   54.49    3.40
   4   3  -6   52.09    6.10
   4   3  -6   50.79    3.90
  -4  -3   5  519.75   21.90
  -4  -3   5  527.75   21.80
  -4  -3   5  500.75   24.70
   4   3  -5  533.85   24.60
  -4  -3   4   37.50    5.30
  -4  -3   4   37.40    3.00
  -4  -3   4   38.50    3.30
   4   3  -4   49.90    5.60
  -4  -3   3  158.08   10.10
  -4  -3   3  165.18    7.90
  -4  -3   3  158.58    7.60
   4   3  -3  156.48    9.80
  -4  -3   2   33.00    4.80
  -4  -3   2   34.80    3.20
  -4  -3   2   34.00    3.10
   4   3  -2   32.20    4.30
  -4  -3   1  456.35   19.60
  -4  -3   1  439.56   21.30
  -4  -3   1  456.95   19.60
   4   3  -1  442.06   20.90
  -4  -3   0   82.09    6.90
  -4  -3   0   92.69    5.80
  -4  -3   0   88.99    5.70
   4   3   0   95.99    6.80
  -4  -3  -1  852.81   35.10
  -4  -3  -1  817.02   36.10
  -4  -3  -1  807.02   34.90
   4   3   1  829.22   35.80
  -4  -3  -2   33.90    4.10
  -4  -3  -2   33.10    4.50
  -4  -3  -2   37.70    4.10
   4   3   2   37.30    4.40
  -4  -3  -3   80.49    6.10
  -4  -3  -3   89.19    6.70
  -4  -3  -3   86.59    7.00
   4   3   3   91.59    6.70
  -4  -3  -4    0.00    2.70
  -4  -3  -4   -1.20    2.30
  -4  -3  -4    2.60    2.70
   4   3   4    1.50    2.60
  -4  -3  -5   47.80    5.40
  -4  -3  -5   49.70    5.10
  -4  -3  -5   64.69    6.50
   4   3   5   44.30    5.00
  -4  -3  -6    2.60    3.00
  -4  -3  -6    1.90    2.80
   4   3   6    4.40    2.90
  -4  -3  -7   27.80    4.70
  -4  -3  -7   48.10    6.70
   4   3   7   35.30    5.10
   4   3   7   34.50    4.80
  -4  -3  -8   13.60    3.80
  -4  -3  -8   15.80    4.20
   4   3   8   17.50    4.40
   4   3   8   19.20    4.00
  -4  -3  -9   39.20    5.70
  -4  -3  -9   34.50    5.60
   4   3   9   30.00    5.60
   4   3   9   24.10    4.70
  -4  -3 -10    2.30    3.80
   4   3  10    5.40    3.30
   4   3  10   -1.80    4.00
  -4  -3 -11    6.10    4.30
   4   3  11    1.90    3.50
   4   3  11    1.90    4.30
   4   3  12    1.70    4.50
  -4  -3 -13   -0.40    4.20
   4   3  13   -2.70    4.60
  -4  -3 -14   -4.40    4.20
   4   3  14   -3.30    5.10
  -4  -3 -15    0.00    4.90
   4   3  15    1.30    5.50
   4   3  16   -7.90    5.20
  -5  -3  17    1.40    2.90
   5   3 -17   -0.70    3.40
  -5  -3  16   27.70    4.10
   5   3 -16   34.40    4.70
   5   3 -16   35.70    8.00
  -5  -3  15    2.60    2.80
   5   3 -15   -2.20    2.60
   5   3 -15    2.90    5.80
  -5  -3  14    0.30    2.40
   5   3 -14    5.10    2.80
   5   3 -14   -4.70    5.20
  -5  -3  13    5.40    2.60
   5   3 -13    6.00    2.90
   5   3 -13   13.90    6.20
  -5  -3  12  124.39    9.20
   5   3 -12  102.89   11.40
   5   3 -12   87.19    6.60
  -5  -3  11   73.69    5.10
   5   3 -11   56.59    8.70
   5   3 -11   69.09    6.00
  -5  -3  10  297.87   12.70
   5   3 -10  254.47   13.10
  -5  -3   9   12.50    2.30
   5   3  -9    6.60    4.70
   5   3  -9    8.90    2.50
   5   3  -9   16.30    5.60
  -5  -3   8   55.39    4.00
   5   3  -8   53.79    7.00
   5   3  -8   46.50    4.30
   5   3  -8   54.99    7.50
  -5  -3   7    2.70    1.70
   5   3  -7    5.60    3.60
   5   3  -7    2.20    4.40
  -5  -3   6   55.69    4.30
  -5  -3   6   56.89    4.00
  -5  -3   6   47.50    6.90
   5   3  -6   50.89    6.60
  -5  -3   5    3.10    1.80
  -5  -3   5    0.70    3.60
  -5  -3   5    0.50    1.90
   5   3  -5    2.00    3.20
  -5  -3   4    2.00    3.40
  -5  -3   4    6.30    2.20
  -5  -3   4    9.00    2.10
   5   3  -4    4.50    3.30
  -5  -3   3   -0.90    3.30
  -5  -3   3   -1.20    2.00
  -5  -3   3   -0.30    1.80
   5   3  -3   -0.60    2.80
  -5  -3   2  129.09    6.90
  -5  -3   2  123.89    9.20
  -5  -3   2  103.09    8.70
   5   3  -2  109.09    8.20
  -5  -3   1    3.40    2.40
  -5  -3   1    7.80    3.70
  -5  -3   1    7.50    2.60
   5   3  -1    8.40    3.40
  -5  -3   0  333.87   18.00
  -5  -3   0  360.06   16.70
  -5  -3   0  382.76   16.80
   5   3   0  353.16   17.60
  -5  -3  -1   11.20    3.10
  -5  -3  -1   10.90    3.00
  -5  -3  -1    8.00    3.50
   5   3   1    9.70    3.20
  -5  -3  -2  168.48    9.80
  -5  -3  -2  168.98    9.50
  -5  -3  -2  146.19   10.10
   5   3   2  165.38    9.80
  -5  -3  -3   13.90    3.30
  -5  -3  -3   16.30    3.70
  -5  -3  -3    7.90    3.50
   5   3   3    8.70    3.20
  -5  -3  -4   32.30    4.90
  -5  -3  -4   40.20    5.30
  -5  -3  -4   38.30    4.70
   5   3   4   33.80    4.60
  -5  -3  -5   16.20    4.40
  -5  -3  -5    4.50    3.40
  -5  -3  -5   14.00    3.80
   5   3   5   15.80    3.70
  -5  -3  -6   -4.40    2.90
  -5  -3  -6    0.30    3.80
  -5  -3  -6   -6.10    2.70
   5   3   6   -2.40    2.70
  -5  -3  -7    9.60    4.00
  -5  -3  -7   14.10    5.00
  -5  -3  -7   17.80    4.10
   5   3   7   15.40    3.90
  -5  -3  -8   -0.60    4.20
  -5  -3  -8    1.20    3.50
   5   3   8    0.60    3.00
  -5  -3  -9   -2.40    3.30
  -5  -3  -9    2.10    4.70
   5   3   9    2.10    3.10
  -5  -3 -10    3.10    4.00
  -5  -3 -10    8.30    5.40
   5   3  10    3.70    3.40
  -5  -3 -11   -2.30    5.00
  -5  -3 -12   13.20    4.70
  -5  -3 -12   10.20    5.90
  -5  -3 -13    1.90    4.50
  -6  -3  14   16.60    3.30
   6   3 -14   17.70    3.70
   6   3 -14   11.30    6.80
  -6  -3  13   94.49    6.20
   6   3 -13   79.99   10.50
   6   3 -13   74.39    6.40
  -6  -3  12    2.50    2.40
   6   3 -12    3.70    2.40
   6   3 -12   -3.50    5.40
   6   3 -11    1.40    2.40
   6   3 -11   -0.40    5.50
  -6  -3  10  107.79    6.30
   6   3 -10   99.59    6.60
   6   3 -10   87.99   10.70
  -6  -3   9  142.79    7.80
   6   3  -9  166.58   13.10
  -6  -3   8   67.39    4.90
   6   3  -8   78.79   13.80
  -6  -3   7  326.37   14.70
   6   3  -7  330.27   19.30
  -6  -3   6   62.69    5.20
  -6  -3   6   59.39    4.70
   6   3  -6   64.59    7.30
   6   3  -6   52.79    8.00
  -6  -3   5   33.10    6.20
  -6  -3   5   45.50    4.30
  -6  -3   5   38.00    3.80
   6   3  -5   39.10    5.80
  -6  -3   4    0.30    3.70
  -6  -3   4    6.30    2.70
   6   3  -4    3.60    3.40
  -6  -3   3   -1.70    2.30
  -6  -3   3    0.90    2.40
  -6  -3   3    1.00    3.60
   6   3  -3    0.50    3.20
  -6  -3   2   23.40    3.60
  -6  -3   2   27.50    3.90
  -6  -3   2   30.60    5.60
   6   3  -2   17.30    4.90
  -6  -3   1   14.10    3.10
  -6  -3   1   11.20    4.40
  -6  -3   1   17.80    3.40
   6   3  -1   13.90    3.80
  -6  -3   0   29.30    4.10
  -6  -3   0   24.80    4.00
  -6  -3   0   20.20    4.80
   6   3   0   22.60    4.20
  -6  -3  -1    5.70    3.30
  -6  -3  -1    6.80    3.90
  -6  -3  -1    0.90    2.80
   6   3   1    2.00    2.90
  -6  -3  -2   13.90    4.30
  -6  -3  -2   13.30    4.00
  -6  -3  -2   20.90    3.90
   6   3   2   18.60    3.90
  -6  -3  -3   28.30    5.00
  -6  -3  -3   17.20    4.30
   6   3   3   18.40    4.00
  -6  -3  -4    4.40    3.90
  -6  -3  -4   -0.30    2.80
  -6  -3  -4   -1.00    3.10
   6   3   4    0.00    2.90
  -6  -3  -5   12.10    3.80
  -6  -3  -5    4.60    3.60
  -6  -3  -5    5.70    4.10
   6   3   5    5.80    3.70
  -6  -3  -6   14.10    4.30
  -6  -3  -6   18.50    6.00
   6   3   6   18.10    4.00
  -6  -3  -7   15.60    5.30
  -6  -3  -7   19.80    4.80
   6   3   7   18.60    4.10
  -6  -3  -8    8.70    5.10
  -6  -3  -8    7.90    4.10
   6   3   8    3.00    3.30
  -6  -3  -9    5.00    5.40
  -6  -3  -9    5.30    3.80
   6   3   9   -0.60    3.00
  -6  -3 -10   -0.20    5.50
  -7  -3  10    4.00    2.50
  -7  -3  10   -0.70    3.30
   7   3 -10   12.40    6.30
  -7  -3   9  143.89    8.00
  -7  -3   9  129.29    7.60
   7   3  -9  115.99   12.20
  -7  -3   8   30.60    3.60
  -7  -3   8   41.20    4.30
   7   3  -8   41.00    7.70
  -7  -3   7   50.79    4.70
  -7  -3   7   41.00    4.10
   7   3  -7   43.20    7.70
  -7  -3   6    6.10    2.90
  -7  -3   6    4.90    2.60
   7   3  -6   11.70    5.60
  -7  -3   5   18.40    3.30
  -7  -3   5   28.20    3.90
   7   3  -5   12.00    5.50
  -7  -3   4   20.90    3.70
  -7  -3   4   11.00    3.10
   7   3  -4   17.20    6.10
  -7  -3   3   16.20    3.50
  -7  -3   3   17.40    3.50
   7   3  -3   14.50    4.20
  -7  -3   2   12.00    3.40
  -7  -3   2   13.90    4.70
  -7  -3   2   14.90    3.50
   7   3  -2    6.80    3.70
  -7  -3   1    1.50    2.80
  -7  -3   1    1.70    4.00
  -7  -3   1   -1.40    2.90
   7   3  -1    6.00    3.30
  -7  -3   0    9.30    4.30
  -7  -3   0   -1.50    3.30
  -7  -3   0    4.50    3.90
   7   3   0   14.70    3.90
  -7  -3  -1   24.50    4.30
  -7  -3  -1   15.40    4.80
  -7  -3  -1   22.40    4.50
   7   3   1   21.10    4.30
  -7  -3  -2   32.70    5.20
  -7  -3  -2   16.50    4.00
  -7  -3  -2   28.10    5.40
   7   3   2   31.60    4.60
  -7  -3  -3    6.50    4.00
  -7  -3  -3    4.30    4.10
   7   3   3    6.40    3.30
  -7  -3  -4   18.10    5.00
  -7  -3  -4   12.90    4.50
   7   3   4   20.40    4.10
  -7  -3  -5   28.50    5.70
  -7  -3  -5   10.40    4.30
   7   3   5   15.10    3.70
  -7  -3  -6    0.90    4.60
  -7  -3  -6   -0.60    3.40
   7   3   6   -7.00    2.40
  -9   4  -7    7.20    6.30
  -9   4  -6    6.60    6.90
  -9   4  -5   13.80    6.80
  -9   4  -4   12.40    6.20
  -9   4  -3   19.90    6.40
  -9   4  -2   39.30    7.20
  -9   4  -1   59.49    8.50
  -9   4   0    5.70    5.10
  -9   4   1   63.49    8.10
  -9   4   2    3.60    5.10
  -9   4   3    4.60    4.90
  -9   4   4   12.20    5.30
   9  -4  -5    9.70    2.00
   9  -4  -5   13.90    2.30
  -9   4   5    8.30    5.10
   9  -4  -6    0.50    2.70
   9  -4  -6    3.10    2.40
  -9   4   6    2.20    4.70
   9  -4  -7    2.20    2.80
   9  -4  -7    4.10    3.20
  -9   4   7    5.60    5.00
  -8   4 -12   48.30    9.40
  -8   4 -11   46.60    9.10
  -8   4 -10   46.20    8.70
  -8   4  -9    8.90    6.70
  -8   4  -8    5.20    5.80
  -8   4  -7   18.90    6.90
  -8   4  -6   55.09    8.20
  -8   4  -5  150.18   12.50
  -8   4  -4   -0.30    4.90
  -8   4  -3   -1.40    4.20
  -8   4  -2  156.78   12.10
  -8   4  -1   28.20    6.00
  -8   4   0  599.24   28.90
  -8   4   1   28.40    5.40
  -8   4   2  151.18   11.30
   8  -4  -3    1.40    1.30
   8  -4  -3    3.30    1.40
  -8   4   3   -5.50    3.80
   8  -4  -4    7.40    2.10
   8  -4  -4    8.60    2.40
  -8   4   4    6.70    4.50
   8  -4  -5  117.39    7.40
   8  -4  -5  146.89    8.30
  -8   4   5  134.19   10.50
   8  -4  -6   84.79    6.70
   8  -4  -6   61.79    5.50
  -8   4   6   59.29    7.30
   8  -4  -7   18.70    3.80
   8  -4  -7   19.90    4.30
  -8   4   7   14.70    5.00
   8  -4  -8    5.70    3.50
   8  -4  -8    3.40    3.40
  -8   4   8    0.80    4.30
   8  -4  -9    3.80    3.70
   8  -4  -9    8.50    3.80
  -8   4   9    6.40    4.80
   8  -4 -10   62.89    7.10
   8  -4 -10   57.29    6.80
  -8   4  10   52.09    7.30
   8  -4 -11   37.40    6.30
  -8   4  11   39.50    6.70
   8  -4 -12   62.49    8.00
  -8   4  12   60.29    8.00
  -7   4 -15    0.60    1.60
  -7   4 -15   -0.40    6.30
  -7   4 -14    3.60    6.30
  -7   4 -13    3.90    6.30
  -7   4 -12   37.20    8.50
  -7   4 -11   38.60    8.10
  -7   4 -10    8.10    5.60
  -7   4  -9   93.99   10.20
  -7   4  -8   28.00    6.40
  -7   4  -7   75.29    9.30
  -7   4  -6   30.10    6.80
  -7   4  -5    8.20    4.70
  -7   4  -4   -3.30    3.60
  -7   4  -3    7.60    4.40
  -7   4  -2    5.60    4.50
  -7   4   0   33.60    8.70
  -7   4   1  139.39   13.50
   7  -4  -2   55.09    3.40
   7  -4  -2   57.29    3.70
   7  -4  -3  115.99    6.70
   7  -4  -3  148.99    7.50
  -7   4   3  153.28   15.40
   7  -4  -4   21.40    3.50
   7  -4  -4   18.60    2.80
  -7   4   4   12.60    4.10
   7  -4  -5   -2.70    2.30
  -7   4   5   -0.80    3.60
   7  -4  -6    4.00    2.90
   7  -4  -6    6.00    2.90
  -7   4   6    3.00    3.60
   7  -4  -7    4.30    3.10
   7  -4  -7    8.60    3.50
  -7   4   7    0.30    3.80
   7  -4  -8    5.50    3.50
   7  -4  -8    2.00    3.30
  -7   4   8    2.40    3.60
   7  -4  -9    5.60    3.80
  -7   4   9    7.50    4.30
   7  -4 -10    4.10    4.20
  -7   4  10   -0.40    3.90
   7  -4 -11   58.49    7.30
  -7   4  11   39.00    6.30
   7  -4 -12   10.70    5.00
  -7   4  12    5.20    4.60
   7  -4 -13   13.20    5.40
  -7   4  13   14.60    5.40
   7  -4 -14    1.00    5.00
  -7   4  14   -7.00    4.70
   7  -4 -15    0.80    5.40
  -6   4 -17   -5.60    5.20
  -6   4 -17    2.90    3.30
  -6   4 -17    5.60    3.00
  -6   4 -16    6.90    2.80
  -6   4 -16    0.70    3.10
  -6   4 -16    2.50    6.90
  -6   4 -15   50.19    5.30
  -6   4 -15   53.19    8.70
  -6   4 -15   46.80    5.20
  -6   4 -14    2.00    5.50
  -6   4 -14   12.60    3.10
  -6   4 -13   59.89    5.00
  -6   4 -13   74.99    9.90
  -6   4 -13   61.59    5.00
  -6   4 -12   20.60    2.80
  -6   4 -12   20.70    2.70
  -6   4 -12   13.80    6.10
  -6   4 -11   19.10    6.50
  -6   4 -11   21.10    2.30
  -6   4 -11   22.10    2.40
  -6   4 -10  188.78   13.90
  -6   4  -9  626.54   30.70
  -6   4  -8  100.99   10.90
  -6   4  -7  757.62   35.30
  -6   4  -6  130.79    9.40
  -6   4  -6  135.29   10.50
  -6   4  -5   11.40    4.60
   6  -4   4  234.38   13.60
  -6   4  -4  235.58   13.90
   6  -4   3  854.31   37.90
  -6   4  -3  840.62   37.90
   6  -4   2   20.10    4.50
  -6   4  -2   16.60    4.40
   6  -4   1  230.58   13.30
  -6   4  -1  246.78   13.50
   6  -4   0   13.20    3.90
  -6   4   0   19.60    4.40
   6  -4  -1  125.29    6.10
   6  -4  -1  116.99    5.80
   6  -4  -1  117.69    8.80
  -6   4   1  115.99    8.60
   6  -4  -2  173.88   10.80
   6  -4  -2  150.18    7.80
  -6   4   2  183.98   10.50
   6  -4  -3 1099.09   48.40
   6  -4  -3 1102.49   46.10
  -6   4   3 1121.69   47.10
  -6   4   3 1147.99   48.10
   6  -4  -4  275.47   14.70
   6  -4  -4  255.77   12.50
  -6   4   4  250.57   14.00
  -6   4   4  263.37   14.00
   6  -4  -5  310.37   16.70
   6  -4  -5  332.87   15.40
  -6   4   5  304.07   16.20
  -6   4   5  312.27   16.10
   6  -4  -6    3.50    2.70
   6  -4  -6   -1.30    2.90
  -6   4   6    1.40    3.00
  -6   4   6   -0.50    3.10
   6  -4  -7    1.00    2.90
  -6   4   7    6.80    3.60
  -6   4   7    5.40    3.40
   6  -4  -8   25.30    4.60
  -6   4   8   31.50    5.40
  -6   4   8   32.20    6.10
   6  -4  -9   60.49    6.60
  -6   4   9   45.70    5.80
  -6   4   9   68.79    7.60
   6  -4 -10    0.50    3.60
  -6   4  10   -0.40    3.70
  -6   4  10   -1.40    3.70
   6  -4 -11   20.00    5.00
  -6   4  11   27.20    5.40
  -6   4  11   22.30    5.60
   6  -4 -12   17.30    5.50
  -6   4  12   14.40    4.80
   6  -4 -13   27.30    6.30
  -6   4  13   30.50    5.90
   6  -4 -14    5.90    5.20
  -6   4  14   11.60    5.00
   6  -4 -15    9.00    5.70
  -6   4  15   -0.20    4.50
   6  -4 -16    5.90    6.20
  -6   4  16   -1.30    4.60
  -5   4 -19   12.30    5.20
  -5   4 -19   18.70    6.70
  -5   4 -18   15.10    5.20
  -5   4 -18   14.90    4.50
  -5   4 -18   16.90    7.40
  -5   4 -17   11.60    4.40
  -5   4 -17    4.20    4.00
  -5   4 -17    3.00    5.70
  -5   4 -16   49.10    6.00
  -5   4 -16   37.50    7.60
  -5   4 -16   50.49    6.50
  -5   4 -15    5.10    5.50
  -5   4 -15    5.90    3.20
  -5   4 -15    5.20    3.70
  -5   4 -14    5.30    2.90
  -5   4 -14    0.70    3.20
  -5   4 -14   12.50    5.90
  -5   4 -13    9.80    3.50
  -5   4 -13   11.20    5.00
  -5   4 -13    8.50    3.10
  -5   4 -12    8.50    3.10
  -5   4 -12    9.90    6.70
  -5   4 -12    3.20    2.80
  -5   4 -11   -1.90    2.00
  -5   4 -11    4.10    2.40
  -5   4 -10   38.90    3.80
  -5   4 -10   26.10    5.60
  -5   4 -10   40.40    6.20
  -5   4 -10   33.10    3.60
  -5   4  -9  253.57   15.00
  -5   4  -9  236.88   11.40
  -5   4  -9  259.17   13.90
  -5   4  -9  245.08   11.40
  -5   4  -8  171.68   10.90
  -5   4  -8  171.78   12.00
  -5   4  -8  177.88    8.10
  -5   4  -8  176.48    8.20
  -5   4  -7    6.60    3.80
  -5   4  -7    5.00    3.00
  -5   4  -7    4.60    1.10
  -5   4  -7    5.70    1.10
  -5   4  -6  246.98   13.90
  -5   4  -6  237.08   13.00
  -5   4  -5  136.99    9.50
   5  -4   4    8.50    2.90
  -5   4  -4    5.30    3.10
   5  -4   3    8.00    3.00
  -5   4  -3   11.50    3.30
   5  -4   2    0.30    2.50
  -5   4  -2    4.20    2.90
   5  -4   1   18.90    1.60
   5  -4   1   22.10    3.70
  -5   4  -1   20.20    3.70
  -5   4  -1   18.10    1.80
   5  -4   0  101.09    7.40
   5  -4   0   97.29    5.00
  -5   4   0  104.09    5.50
  -5   4   0   96.99    7.20
   5  -4  -1  114.69    5.70
   5  -4  -1  116.19    7.70
  -5   4   1  105.69    6.20
  -5   4   1  103.19    7.50
   5  -4  -2   80.59    6.90
   5  -4  -2   68.89    4.40
  -5   4   2   65.49    4.90
  -5   4   2   61.49    5.80
   5  -4  -3    1.50    2.60
   5  -4  -3    0.80    1.80
  -5   4   3   -0.90    1.90
  -5   4   3    0.80    2.50
   5  -4  -4  541.45   24.30
   5  -4  -4  498.25   22.80
  -5   4   4  530.65   23.80
   5  -4  -5  217.58   12.00
   5  -4  -5  193.88   10.80
  -5   4   5  201.78   11.50
  -5   4   5  239.08   11.90
   5  -4  -6    0.30    2.30
  -5   4   6    4.40    2.80
  -5   4   6    2.30    2.90
   5  -4  -7   91.29    7.50
   5  -4  -7   81.19    6.80
  -5   4   7   91.49    8.10
  -5   4   7   89.79    7.20
   5  -4  -8    1.10    3.10
   5  -4  -8    0.60    3.00
  -5   4   8    1.10    3.10
  -5   4   8    1.50    3.40
   5  -4  -9    1.00    3.50
   5  -4  -9    2.00    3.60
  -5   4   9   -4.10    2.90
  -5   4   9   -1.90    3.20
   5  -4 -10   98.59    8.30
  -5   4  10   72.49    7.00
  -5   4  10   90.69    8.80
   5  -4 -11    9.30    4.30
  -5   4  11    0.90    4.10
  -5   4  11    5.90    3.70
   5  -4 -12   11.60    5.00
  -5   4  12    9.20    4.30
   5  -4 -13   15.20    5.50
  -5   4  13    6.00    4.40
   5  -4 -14   43.80    7.50
  -5   4  14   53.39    7.10
   5  -4 -15   59.99    9.00
  -5   4  15   71.39    7.90
   5  -4 -16    5.40    5.90
  -5   4  16   -0.90    4.40
   5  -4 -17   -8.50    5.40
  -5   4  17    5.80    5.20
   5  -4 -18    8.90    7.20
  -5   4  18   -3.50    4.60
  -4   4 -20   -7.60    4.70
  -4   4 -20   -2.40    5.20
  -4   4 -19   14.20    6.50
  -4   4 -19   18.70    6.10
  -4   4 -18    0.50    4.60
  -4   4 -18    5.20    5.80
  -4   4 -17  290.47   18.60
  -4   4 -17  304.37   17.10
  -4   4 -17  292.87   17.60
  -4   4 -16   70.89    9.30
  -4   4 -16   63.59    7.90
  -4   4 -15  154.28   11.20
  -4   4 -15  155.78   12.60
  -4   4 -15  164.48   10.90
  -4   4 -14    8.10    3.90
  -4   4 -14    7.70    3.40
  -4   4 -14    9.00    4.90
  -4   4 -13   42.30    5.40
  -4   4 -13   33.90    5.20
  -4   4 -13   36.00    6.80
  -4   4 -12   25.50    5.80
  -4   4 -12   33.50    5.00
  -4   4 -12   28.10    4.90
  -4   4 -12   32.20    4.40
  -4   4 -11  930.01   40.20
  -4   4 -11  888.41   41.50
  -4   4 -11  968.70   41.10
  -4   4 -11  951.90   42.20
  -4   4 -10   33.90    4.20
  -4   4 -10   29.70    3.90
  -4   4 -10   28.60    5.20
  -4   4  -9    7.90    2.40
  -4   4  -9    4.90    3.50
  -4   4  -9    6.40    2.90
  -4   4  -9    3.80    2.40
  -4   4  -8  241.38   12.60
  -4   4  -8  220.78   11.60
  -4   4  -8  237.28   11.30
  -4   4  -8  248.68   13.60
  -4   4  -7  737.23   32.00
  -4   4  -7  755.92   33.10
  -4   4  -7  779.32   34.00
  -4   4  -7  760.42   31.70
  -4   4  -6  228.88   10.30
  -4   4  -6  213.48    9.90
  -4   4  -6  204.48   11.40
  -4   4  -6  214.08   12.20
   4  -4   5 4273.77  201.08
  -4   4  -5 4085.49  187.98
  -4   4  -5 4417.66  205.28
  -4   4  -5 4276.57  182.88
   4  -4   4   20.70    3.60
   4  -4   4   28.30    2.50
  -4   4  -4   24.60    3.90
  -4   4  -4   28.40    2.30
   4  -4   3 1392.76   58.89
   4  -4   3 1445.46   57.19
  -4   4  -3 1414.36   57.09
  -4   4  -3 1387.16   59.09
   4  -4   2   62.99    3.70
   4  -4   2   68.89    5.50
  -4   4  -2   57.69    5.40
  -4   4  -2   73.89    3.80
   4  -4   1  430.06   18.30
   4  -4   1  446.26   20.10
  -4   4  -1  428.46   18.50
  -4   4  -1  442.16   20.00
   4  -4   0   28.60    2.50
   4  -4   0   23.50    3.60
  -4   4   0   26.50    2.60
  -4   4   0   27.70    3.80
   4  -4  -1   43.40    4.50
   4  -4  -1   39.20    3.20
  -4   4   1   40.90    4.40
  -4   4   1   44.80    3.60
   4  -4  -2  539.75   23.60
   4  -4  -2  526.85   22.50
  -4   4   2  521.35   23.40
  -4   4   2  513.65   22.80
   4  -4  -3  220.28   11.60
   4  -4  -3  217.88   10.80
  -4   4   3  227.58   11.50
  -4   4   3  229.48   11.30
   4  -4  -4   22.30    3.10
   4  -4  -4   18.30    3.20
  -4   4   4   23.20    3.50
  -4   4   4   27.30    4.10
   4  -4  -5  429.66   19.40
   4  -4  -5  427.26   19.80
  -4   4   5  403.16   19.40
  -4   4   5  422.06   19.60
   4  -4  -6    4.20    2.60
   4  -4  -6    3.20    2.50
  -4   4   6   -0.90    2.30
  -4   4   6    0.50    2.30
   4  -4  -7  255.07   13.30
   4  -4  -7  249.08   13.30
  -4   4   7  247.58   13.10
  -4   4   7  258.77   13.70
   4  -4  -8  138.59    9.30
   4  -4  -8  140.99    9.40
  -4   4   8  147.09    9.70
  -4   4   8  141.39    8.90
   4  -4  -9   39.90    5.50
   4  -4  -9   53.49    6.10
  -4   4   9   49.10    5.40
  -4   4   9   49.30    6.20
   4  -4 -10    3.90    3.70
   4  -4 -10    7.80    4.10
  -4   4  10    2.40    3.00
   4  -4 -11  153.08   13.30
   4  -4 -11  112.49    9.70
  -4   4  11  124.79   10.20
  -4   4  11  133.59    9.30
   4  -4 -12    7.00    4.60
  -4   4  12    4.80    4.10
  -4   4  12    5.50    4.80
   4  -4 -13    3.60    4.70
  -4   4  13    6.80    4.00
   4  -4 -14    1.30    4.70
  -4   4  14    2.00    4.10
   4  -4 -15   22.60    6.20
  -4   4  15   35.30    6.30
   4  -4 -16    5.90    5.70
  -4   4  16    8.80    4.70
   4  -4 -17   -5.50    5.30
  -4   4  17    5.00    4.80
   4  -4 -18   -0.80    5.70
  -4   4  18    0.40    4.80
   4  -4 -19   -3.00    6.20
  -4   4  19   -7.90    4.30
  -3   4 -21   13.60    6.80
  -3   4 -20    2.90    5.90
  -3   4 -19   -5.50    5.10
  -3   4 -18   46.90    8.10
  -3   4 -17   16.10    5.50
  -3   4 -17   11.50    4.60
  -3   4 -16  200.98   13.70
  -3   4 -16  180.68   13.50
  -3   4 -16  210.18   13.40
  -3   4 -15   32.70    6.10
  -3   4 -15   22.00    5.00
  -3   4 -15   30.60    6.40
  -3   4 -14   26.10    5.70
  -3   4 -14   25.00    5.50
  -3   4 -14   27.20    4.80
  -3   4 -14   30.30    5.20
  -3   4 -13   12.70    4.20
  -3   4 -13   16.50    4.80
  -3   4 -13   23.70    4.50
  -3   4 -13   19.70    4.20
  -3   4 -12   -0.70    3.40
  -3   4 -12    0.10    3.10
  -3   4 -12    4.50    3.10
  -3   4 -12    1.40    2.80
  -3   4 -11   22.70    4.80
  -3   4 -11   26.90    4.30
  -3   4 -11   16.10    3.80
  -3   4 -11   18.50    4.10
  -3   4 -10  108.09    7.40
  -3   4 -10   99.09    8.10
  -3   4 -10   98.79    7.10
  -3   4  -9  112.29    7.40
  -3   4  -9  112.99    8.30
  -3   4  -9  107.29    7.50
  -3   4  -9  111.99    8.00
  -3   4  -8  347.97   17.50
  -3   4  -8  354.36   16.90
  -3   4  -8  357.36   16.60
  -3   4  -8  362.66   16.80
  -3   4  -7    2.60    1.90
  -3   4  -7    0.40    1.70
  -3   4  -7    2.10    2.60
  -3   4  -7    0.90    2.00
  -3   4  -6  951.40   40.90
  -3   4  -6  956.00   40.30
  -3   4  -6  952.90   39.70
   3  -4   5  439.36   20.00
   3  -4   5  440.56   19.30
  -3   4  -5  436.56   20.30
  -3   4  -5  456.05   19.20
   3  -4   4   95.39    5.90
   3  -4   4   84.59    5.00
  -3   4  -4   89.49    4.90
  -3   4  -4   76.99    6.50
   3  -4   3    0.50    1.20
   3  -4   3    0.20    1.60
  -3   4  -3    1.30    2.00
  -3   4  -3    0.20    1.10
   3  -4   2  119.39    6.10
   3  -4   2  124.79    7.00
  -3   4  -2  125.29    6.20
  -3   4  -2  115.49    7.00
   3  -4   1   11.10    1.80
   3  -4   1   12.90    2.40
  -3   4  -1   10.30    2.40
  -3   4  -1    9.00    1.70
   3  -4   0  334.87   15.00
   3  -4   0  329.37   14.30
  -3   4   0  305.37   14.90
  -3   4   0  323.77   14.40
   3  -4  -1   21.30    2.80
   3  -4  -1   20.00    2.40
  -3   4   1   26.80    2.80
   3  -4  -2  461.85   20.70
   3  -4  -2  476.65   20.40
  -3   4   2  475.75   20.70
  -3   4   2  456.65   20.40
   3  -4  -3   40.30    4.00
   3  -4  -3   46.20    3.80
  -3   4   3   36.20    3.70
  -3   4   3   32.00    3.60
   3  -4  -4  208.68   10.50
   3  -4  -4  197.48   10.30
  -3   4   4  197.58   10.40
  -3   4   4  209.88   10.50
   3  -4  -5  123.59    7.50
   3  -4  -5  116.19    7.30
  -3   4   5  122.69    7.60
  -3   4   5  122.29    7.40
   3  -4  -6  285.17   14.30
   3  -4  -6  297.07   14.20
  -3   4   6  282.97   14.00
  -3   4   6  284.47   14.40
   3  -4  -7  104.99    7.00
   3  -4  -7  104.49    7.30
  -3   4   7  103.19    7.00
  -3   4   7   83.69    7.00
   3  -4  -8   60.29    6.10
   3  -4  -8   68.09    6.40
  -3   4   8   64.79    5.80
  -3   4   8   70.39    6.60
   3  -4  -9   14.30    4.00
   3  -4  -9   22.60    4.30
  -3   4   9   17.20    3.70
  -3   4   9   17.90    4.10
   3  -4 -10   60.59    6.70
   3  -4 -10   76.39    7.20
  -3   4  10   65.39    6.30
  -3   4  10   73.39    7.20
   3  -4 -11   10.60    4.30
   3  -4 -11   13.40    3.80
  -3   4  11   15.10    4.00
  -3   4  11   19.30    4.70
   3  -4 -12   23.60    5.50
  -3   4  12   43.10    6.70
  -3   4  12   34.40    5.20
   3  -4 -13   68.99   12.80
  -3   4  13   63.69    7.10
   3  -4 -14    9.30    5.20
  -3   4  14   10.80    4.30
   3  -4 -15   41.80    7.80
  -3   4  15   44.70    6.60
   3  -4 -16   23.00    6.40
  -3   4  16   14.70    5.20
   3  -4 -17    0.20    5.30
  -3   4  17   -5.80    4.10
   3  -4 -18    2.30    6.20
  -3   4  18    0.90    4.90
   3  -4 -19    3.50    6.20
  -3   4  19    5.30    6.00
   2  -4  22    6.20    4.90
  -2   4 -22   -1.30    6.40
   2  -4  21    3.60    4.90
  -2   4 -21    2.10    6.20
   2  -4  20   40.20    6.40
  -2   4 -20   61.79    9.60
   2  -4  19   19.90    5.20
  -2   4 -19   30.50    7.10
   2  -4  18   16.40    4.80
  -2   4 -18   15.00    6.30
   2  -4  17    1.90    3.80
  -2   4 -17    8.60    6.20
   2  -4  16   26.90    5.10
  -2   4 -16   20.60    4.70
  -2   4 -16   30.20    6.00
  -2   4 -16   28.10    6.60
   2  -4  15  415.76   20.30
  -2   4 -15  414.06   20.30
  -2   4 -15  382.26   21.80
  -2   4 -15  419.66   21.60
   2  -4  14  732.13   33.00
  -2   4 -14  729.83   34.10
  -2   4 -14  755.42   34.90
  -2   4 -13  323.77   18.10
  -2   4 -13  339.37   17.80
  -2   4 -13  336.87   16.70
  -2   4 -12  542.95   24.60
  -2   4 -12  528.65   25.40
  -2   4 -12  538.15   25.90
  -2   4 -11  127.69    8.80
  -2   4 -11  132.39    9.30
  -2   4 -11  131.29    9.00
  -2   4 -11  134.19    8.30
  -2   4 -10    2.70    2.20
  -2   4 -10   -0.70    2.70
  -2   4 -10    1.00    2.60
  -2   4 -10   -0.60    2.40
  -2   4  -9  305.47   15.20
  -2   4  -9  318.27   15.10
  -2   4  -9  308.47   14.40
  -2   4  -9  267.57   15.20
  -2   4  -8  548.85   23.90
  -2   4  -8  547.05   25.50
  -2   4  -8  553.74   24.50
  -2   4  -8  530.15   24.80
   2  -4   7  243.78   12.30
  -2   4  -7  251.57   12.20
  -2   4  -7  252.17   11.80
  -2   4  -7  229.68   12.10
   2  -4   6  519.35   22.30
  -2   4  -6  490.35   21.80
  -2   4  -6  482.35   22.20
  -2   4  -6  525.75   22.30
   2  -4   5   50.09    4.10
   2  -4   5   56.39    4.20
  -2   4  -5   51.29    4.10
  -2   4  -5   53.49    4.60
   2  -4   4  304.87   14.10
   2  -4   4  320.67   14.10
  -2   4  -4  311.07   14.20
  -2   4  -4  304.67   14.10
   2  -4   3  194.78    9.40
   2  -4   3  195.68    9.40
  -2   4  -3  195.18    9.60
  -2   4  -3  197.38    9.40
   2  -4   2  569.34   24.20
   2  -4   2  572.84   24.20
  -2   4  -2  578.44   24.20
  -2   4  -2  551.74   24.20
   2  -4   1 1021.70   43.00
  -2   4  -1 1058.79   43.10
   2  -4   0 1135.09   62.79
   2  -4   0 1181.98   67.19
  -2   4   0 1201.88   63.39
  -2   4   0 1205.38   67.69
   2  -4  -1   38.10    3.60
   2  -4  -1   48.10    3.50
  -2   4   1   44.70    3.60
  -2   4   1   33.60    3.20
   2  -4  -2  493.95   21.60
   2  -4  -2  486.35   21.80
  -2   4   2  524.35   21.90
  -2   4   2  491.95   21.60
   2  -4  -3  364.26   17.10
  -2   4   3  393.76   17.00
   2  -4  -4    6.70    1.90
   2  -4  -4    6.50    2.20
  -2   4   4    7.10    2.20
  -2   4   4    8.70    2.30
   2  -4  -5   46.60    4.60
   2  -4  -5   54.89    4.50
  -2   4   5   50.99    4.80
  -2   4   5   47.40    4.30
   2  -4  -6   24.60    3.70
   2  -4  -6   26.70    3.60
  -2   4   6   27.60    4.00
  -2   4   6   23.40    3.30
   2  -4  -7    6.70    3.00
   2  -4  -7   11.00    3.00
  -2   4   7    7.90    2.90
  -2   4   7    6.70    2.60
   2  -4  -8   47.70    5.10
   2  -4  -8   33.50    4.70
  -2   4   8   42.30    4.90
  -2   4   8   50.09    5.60
   2  -4  -9    5.20    3.10
   2  -4  -9   13.20    4.00
  -2   4   9    8.10    3.10
  -2   4   9   20.80    4.30
   2  -4 -10    6.40    3.60
   2  -4 -10    2.50    3.30
  -2   4  10    5.20    3.10
  -2   4  10   11.40    4.00
   2  -4 -11   23.50    4.70
   2  -4 -11   23.60    5.00
  -2   4  11   25.70    5.00
  -2   4  11   25.00    4.40
   2  -4 -12   14.10    4.70
   2  -4 -12   18.20    4.50
  -2   4  12   16.20    4.80
  -2   4  12   12.20    4.10
   2  -4 -14   59.99    8.20
  -2   4  14   42.70    6.20
   2  -4 -15   12.40    5.60
  -2   4  15   -6.00    3.70
   2  -4 -16    9.50    5.50
  -2   4  16   -3.80    4.40
   2  -4 -17    2.30    5.90
  -2   4  17    9.20    5.40
   2  -4 -18   -2.50    5.60
  -2   4  18   -2.10    4.90
   2  -4 -19   -1.20    6.20
  -2   4  19    1.40    5.40
   1  -4  22    5.80    4.70
   1  -4  21    6.20    4.40
  -1   4 -21   -0.30    5.80
   1  -4  20   35.20    6.00
  -1   4 -20   37.60    8.20
   1  -4  19    7.80    4.20
  -1   4 -19   11.30    6.20
  -1   4 -18   18.70    6.60
   1  -4  17    8.80    4.00
  -1   4 -17   28.90    7.00
  -1   4 -17   20.30    4.70
   1  -4  16   10.90    3.90
  -1   4 -16    9.80    5.20
  -1   4 -16   12.10    3.90
   1  -4  15   85.39    7.20
  -1   4 -15   85.39    8.90
  -1   4 -15   77.99    7.00
  -1   4 -15   85.99    9.70
   1  -4  14  215.38   11.60
  -1   4 -14  181.48   13.40
  -1   4 -14  225.88   13.50
  -1   4 -14  207.78   11.80
   1  -4  13  556.84   25.00
  -1   4 -13  568.54   25.30
  -1   4 -13  566.84   26.80
  -1   4 -13  521.55   27.00
   1  -4  12   39.30    4.40
  -1   4 -12   37.40    5.50
  -1   4 -12   51.09    5.00
  -1   4 -12   42.60    6.30
   1  -4  11    8.50    2.50
  -1   4 -11    8.70    2.60
  -1   4 -11    8.10    3.90
  -1   4 -11    7.50    3.20
  -1   4 -10    0.70    2.80
  -1   4 -10   -1.80    1.90
  -1   4 -10    0.60    2.80
  -1   4  -9  143.09    9.70
  -1   4  -9  159.88    8.80
  -1   4  -9  142.69    8.60
  -1   4  -9  154.98    9.40
   1  -4   8    7.20    2.70
  -1   4  -8    6.00    2.20
  -1   4  -8   10.70    2.90
  -1   4  -8    9.10    2.00
   1  -4   7   95.99    6.60
  -1   4  -7   93.99    6.60
  -1   4  -7   94.99    5.50
  -1   4  -7   96.69    5.90
   1  -4   6   22.90    3.40
  -1   4  -6   33.90    2.90
  -1   4  -6   29.10    4.20
  -1   4  -6   35.00    3.20
  -1   4  -5  661.53   29.10
  -1   4  -5  726.33   30.00
  -1   4  -5  700.23   28.90
   1  -4   4  470.25   20.20
   1  -4   4  469.25   21.00
  -1   4  -4  489.75   21.10
  -1   4  -4  476.85   20.30
   1  -4   3 1599.24   88.29
   1  -4   3 1672.53   77.89
  -1   4  -3 1662.83   90.79
  -1   4  -3 1627.74   77.69
   1  -4   2   31.70    3.30
   1  -4   2   35.10    2.60
  -1   4  -2   32.10    3.20
  -1   4  -2   33.20    2.60
   1  -4   1   41.60    2.90
   1  -4   1   40.70    3.50
  -1   4  -1   43.90    3.00
  -1   4  -1   42.20    3.60
   1  -4   0   72.69    4.20
   1  -4   0   73.09    4.80
  -1   4   0   80.49    4.40
  -1   4   0   73.69    4.80
   1  -4  -1    0.80    1.50
   1  -4  -1    0.60    1.10
  -1   4   1   -1.50    1.30
  -1   4   1    1.20    1.30
   1  -4  -2   49.10    4.10
   1  -4  -2   47.90    3.50
  -1   4   2   51.39    3.70
   1  -4  -3   11.30    2.40
   1  -4  -3    8.80    1.90
  -1   4   3   10.30    2.20
  -1   4   3    9.30    2.50
   1  -4  -4    1.60    1.90
   1  -4  -4    0.60    1.60
  -1   4   4    0.20    1.70
  -1   4   4    1.30    1.90
   1  -4  -5  784.42   33.50
   1  -4  -5  780.42   32.90
  -1   4   5  755.52   33.40
  -1   4   5  771.72   33.00
   1  -4  -6    7.60    2.80
   1  -4  -6    8.80    2.50
  -1   4   6    8.40    2.70
  -1   4   6    8.60    2.80
   1  -4  -7  440.26   20.00
   1  -4  -7  435.56   20.70
  -1   4   7  443.46   20.70
  -1   4   7  431.86   20.20
   1  -4  -8    1.50    2.80
   1  -4  -8    1.40    2.30
  -1   4   8   -1.60    2.30
  -1   4   8    1.80    2.60
   1  -4  -9    0.90    2.50
   1  -4  -9    4.40    3.30
  -1   4   9    0.60    2.90
  -1   4   9    3.50    3.00
   1  -4 -10  127.69    9.30
   1  -4 -10  130.49    8.60
  -1   4  10  119.69    8.80
  -1   4  10  107.99   12.90
   1  -4 -11   -3.30    2.80
   1  -4 -11    3.50    3.70
  -1   4  11    4.30    3.60
  -1   4  11    0.90    3.30
   1  -4 -12   18.30    5.10
   1  -4 -12   25.60    5.00
  -1   4  12   16.50    4.50
  -1   4  12   28.90    5.30
   1  -4 -13   30.80    9.70
   1  -4 -14   27.10    6.40
  -1   4  14   19.70    5.30
   1  -4 -15   20.50    6.20
  -1   4  15   26.10    6.00
   1  -4 -16   11.70    6.20
  -1   4  16    5.30    5.30
   1  -4 -17    7.10    6.20
  -1   4  17    1.00    5.20
   1  -4 -18   18.80    7.20
  -1   4  18    9.00    5.70
   1  -4 -19    3.90    6.30
  -1   4  19    2.50    5.70
   0  -4  22   93.49    9.20
   0   4 -22  101.79   12.90
   0  -4  21    0.80    4.00
   0   4 -21   -6.80    5.70
   0  -4  20   23.70    5.20
   0   4 -20   23.20    7.50
   0  -4  19   -1.60    4.50
   0   4 -19    1.50    5.90
   0  -4  18   57.49    6.30
   0   4 -18   62.59    6.80
   0   4 -18   53.09    8.70
   0  -4  17   -0.60    3.20
   0   4 -17    3.10    3.40
   0   4 -17    1.90    5.10
   0  -4  16   36.60    5.20
   0   4 -16   49.00    5.90
   0   4 -16   38.20    7.40
   0  -4  15   -0.80    2.70
   0   4 -15   -1.80    3.90
   0   4 -15   -1.50    4.30
   0   4 -15    0.10    2.90
   0  -4  14   23.30    3.90
   0   4 -14   21.30    3.90
   0   4 -14   21.90    5.30
   0   4 -14   26.60    6.10
   0  -4  13   -1.40    2.20
   0   4 -13   -1.50    2.40
   0   4 -13   -2.80    3.10
   0   4 -13    2.00    3.90
   0  -4  12  634.64   27.80
   0   4 -12  642.74   30.10
   0   4 -12  651.73   30.70
   0   4 -12  636.24   28.00
   0  -4  11    0.10    1.80
   0   4 -11    1.80    2.10
   0   4 -11    5.60    3.30
   0   4 -11    0.60    3.30
   0  -4  10  580.64   25.50
   0   4 -10  620.64   25.80
   0   4 -10  606.54   27.70
   0   4 -10  576.44   28.10
   0  -4   9   -1.80    2.50
   0   4  -9    1.40    2.50
   0   4  -9    1.60    1.60
   0  -4   8 1153.08   50.29
   0   4  -8 1229.38   50.49
   0   4  -8 1148.39   48.60
   0   4  -8 1191.18   48.40
   0  -4   7   -1.40    1.90
   0   4  -7   -0.60    1.20
   0   4  -7    0.70    1.20
   0   4  -7   -0.90    2.00
   0  -4   6  399.46   19.00
   0   4  -6  406.26   17.20
   0   4  -6  400.66   19.00
   0   4  -6  411.26   17.10
   0   4  -5    0.60    0.90
   0   4  -5    0.50    0.90
   0   4  -5    0.40    1.80
   0  -4   4   14.40    2.80
   0   4  -4   12.00    1.30
   0   4  -4    9.70    2.60
   0   4  -4   13.00    1.30
   0  -4   3    1.40    0.80
   0  -4   3    0.00    1.80
   0   4  -3   -0.60    1.50
   0   4  -3    2.30    0.80
   0  -4   2   34.00    3.70
   0  -4   2   44.00    2.50
   0   4  -2   47.50    4.90
   0   4  -2   41.30    2.50
   0  -4   1    1.60    1.60
   0  -4   1   -0.10    0.80
   0   4  -1    0.90    1.80
   0   4  -1    0.70    0.90
   0  -4   0 1346.27   83.59
   0  -4   0 1476.05   68.29
   0   4   0 1519.05   85.89
   0   4   0 1521.75   70.19
   0  -4  -1   -1.30    1.60
   0  -4  -1    0.50    1.00
   0   4   1   -0.40    1.50
   0   4   1    1.50    1.30
   0  -4  -2  300.37   13.10
   0   4   2  289.67   13.40
   0  -4  -3   -0.50    1.30
   0  -4  -3    0.90    2.00
   0   4   3   -2.10    1.50
   0   4   3    0.80    1.90
   0  -4  -4  381.56   18.70
   0   4   4  427.36   18.40
   0  -4  -5   -0.20    1.70
   0  -4  -5    4.60    2.40
   0   4   5   -0.80    2.20
   0   4   5   -1.40    2.00
   0  -4  -6 1261.67   53.09
   0  -4  -6 1280.17   52.19
   0   4   6 1197.98   52.49
   0   4   6 1272.17   52.99
   0  -4  -7    2.60    2.60
   0  -4  -7   -0.90    2.00
   0   4   7   -3.90    2.20
   0   4   7    1.50    2.60
   0  -4  -8  195.38   10.80
   0  -4  -8  194.78   11.50
   0   4   8  220.48   11.70
   0   4   8  183.78   11.30
   0  -4  -9    0.70    2.90
   0  -4  -9    1.50    2.60
   0   4   9   -3.70    3.10
   0   4   9    0.60    2.80
   0  -4 -10  125.19    9.50
   0  -4 -10  122.79    9.40
   0   4  10  116.39    9.10
   0   4  10  131.89    9.40
   0  -4 -11    2.10    3.50
   0  -4 -11   -6.70    2.60
   0   4  11    2.40    3.80
   0   4  11   -2.30    3.10
   0  -4 -12    0.20    3.40
   0  -4 -12    0.00    3.80
   0   4  12    4.20    4.30
   0   4  12    1.20    4.00
   0  -4 -13   -2.60    3.90
   0   4  13   -4.00    4.20
   0  -4 -14   11.20    5.00
   0   4  14   10.80    5.10
   0  -4 -15   -3.20    5.00
   0   4  15   -2.30    4.40
   0  -4 -16   18.10    6.60
   0   4  16   22.20    6.30
   0  -4 -17    4.70    5.90
   0   4  17   -1.20    5.10
   0  -4 -18   -2.70    5.90
   0   4  18    6.10    5.80
   0  -4 -19    5.00    6.60
   0   4  19   -9.30    5.00
  -1  -4  21   51.69    6.30
   1   4 -21   43.70   10.10
  -1  -4  20   -3.50    3.30
   1   4 -20    1.40    6.40
  -1  -4  19    1.30    3.20
   1   4 -19   -3.60    3.40
   1   4 -19    6.10    6.10
  -1  -4  18    3.50    3.30
   1   4 -18    6.50    6.00
   1   4 -18    4.50    3.30
  -1  -4  17   68.49    6.40
   1   4 -17   51.19    8.70
   1   4 -17   66.39    6.60
  -1  -4  16   24.10    4.00
   1   4 -16   13.40    3.80
   1   4 -16   20.60    6.40
  -1  -4  15   32.90    4.30
   1   4 -15   39.00    4.70
   1   4 -15   36.90    7.00
  -1  -4  14   48.00    4.80
   1   4 -14   51.19    5.20
   1   4 -14   55.09    7.80
  -1  -4  13   79.39    6.90
   1   4 -13   91.59    9.20
   1   4 -13   90.69    9.70
   1   4 -13   82.19    6.20
  -1  -4  12  139.79    7.60
   1   4 -12  133.19   11.00
   1   4 -12  139.59   10.20
  -1  -4  11 1097.89   44.50
   1   4 -11 1096.59   47.50
   1   4 -11 1065.19   44.70
   1   4 -11 1039.00   47.80
  -1  -4  10   11.10    2.00
   1   4 -10   13.70    4.10
   1   4 -10   12.00    2.20
   1   4 -10    9.10    4.30
  -1  -4   9    5.00    1.50
  -1  -4   9    4.50    3.20
   1   4  -9    5.50    1.60
   1   4  -9    9.10    3.50
  -1  -4   8   20.60    4.20
   1   4  -8   22.70    2.20
   1   4  -8   29.80    4.50
  -1  -4   7  136.79    8.80
   1   4  -7  131.79    6.10
   1   4  -7  132.99    6.00
   1   4  -7  145.39    8.90
  -1  -4   6   -1.60    2.20
   1   4  -6    6.90    2.60
  -1  -4   5  120.49    7.80
   1   4  -5  114.89    7.70
  -1  -4   4   -0.10    2.00
   1   4  -4    3.10    2.30
  -1  -4   3   62.09    5.10
   1   4  -3   64.69    5.30
  -1  -4   2  225.88   11.90
  -1  -4   2  238.28    9.70
   1   4  -2  247.48   12.10
   1   4  -2  235.08    9.80
  -1  -4   1 2060.89  112.69
  -1  -4   1 2055.79   87.49
   1   4  -1 2190.08  113.99
   1   4  -1 1919.01   89.29
  -1  -4   0    6.90    2.40
  -1  -4   0    9.00    1.30
   1   4   0    9.70    2.40
   1   4   0   10.00    1.70
  -1  -4  -1   19.80    3.20
  -1  -4  -1   26.00    2.30
   1   4   1   23.70    3.30
   1   4   1   27.60    2.70
  -1  -4  -2   30.80    4.10
  -1  -4  -2   36.00    3.00
   1   4   2   34.50    3.50
   1   4   2   35.90    4.10
  -1  -4  -3   57.99    4.20
  -1  -4  -3   63.79    5.30
   1   4   3   59.49    4.80
   1   4   3   70.29    5.40
  -1  -4  -4   28.20    3.30
  -1  -4  -4   24.50    3.80
   1   4   4   22.20    3.40
   1   4   4   27.90    3.90
  -1  -4  -5    2.10    1.90
  -1  -4  -5    6.10    2.80
   1   4   5    3.70    2.50
   1   4   5    4.70    2.50
  -1  -4  -6    6.00    2.40
  -1  -4  -6    3.70    2.70
   1   4   6   11.30    3.00
   1   4   6    5.20    2.80
  -1  -4  -7   26.50    4.00
  -1  -4  -7   22.80    4.20
   1   4   7   28.30    4.30
   1   4   7   24.70    4.20
  -1  -4  -8  165.88   10.60
  -1  -4  -8  174.68    9.90
   1   4   8  169.58   10.40
   1   4   8  165.78   10.60
  -1  -4  -9  172.68   10.40
  -1  -4  -9  174.98   11.20
   1   4   9  172.88   12.20
   1   4   9  170.98   11.30
  -1  -4 -10   63.99    6.40
  -1  -4 -10   60.39    6.80
   1   4  10   77.79    7.70
   1   4  10   69.19    7.00
  -1  -4 -11   53.89    6.00
  -1  -4 -11   38.60    6.50
   1   4  11   50.59    6.70
   1   4  11   59.39    6.80
  -1  -4 -12   20.70    5.10
   1   4  12   19.70    5.50
  -1  -4 -13   30.60    6.30
   1   4  13   25.60    6.20
  -1  -4 -14    6.90    5.20
   1   4  14   10.60    5.50
  -1  -4 -15    3.20    5.30
   1   4  15   11.20    5.90
  -1  -4 -16   27.30    7.20
   1   4  16   30.50    7.10
  -1  -4 -17   13.90    6.70
   1   4  17   -1.90    5.20
  -1  -4 -18    3.60    6.30
   1   4  18    0.50    6.20
  -2  -4  21   19.90    4.60
   2   4 -21   20.70    7.70
  -2  -4  20   41.30    5.50
  -2  -4  19   39.60    5.30
   2   4 -19   43.10    9.30
   2   4 -19   36.90    5.50
  -2  -4  18   58.29    6.00
   2   4 -18   73.09   10.80
  -2  -4  17    5.00    3.10
   2   4 -17    6.10    3.30
   2   4 -17   -0.50    5.40
  -2  -4  16    0.60    2.70
   2   4 -16   -1.60    2.70
   2   4 -16    6.40    5.30
  -2  -4  15   17.50    3.30
   2   4 -15   23.90    3.90
   2   4 -15    9.40    5.60
  -2  -4  14  113.49    7.20
   2   4 -14  126.79   11.90
   2   4 -14  112.99    7.50
  -2  -4  13    8.90    2.60
   2   4 -13    9.50    3.60
   2   4 -13    7.40    5.10
  -2  -4  12   35.40    3.40
   2   4 -12   33.70    3.50
   2   4 -12   34.90    5.80
   2   4 -12   18.90    5.50
  -2  -4  11    3.60    1.80
   2   4 -11    2.60    4.10
   2   4 -11    5.50    1.90
   2   4 -11   13.80    4.50
  -2  -4  10    2.30    1.40
   2   4 -10    2.70    1.50
  -2  -4   9   -0.10    1.10
  -2  -4   9    0.80    3.40
   2   4  -9    3.00    3.00
   2   4  -9    0.30    1.10
  -2  -4   8  182.38   11.30
   2   4  -8  183.38   11.30
   2   4  -8  175.08    7.60
  -2  -4   7   97.39    7.90
   2   4  -7  104.19    8.00
  -2  -4   6   41.40    5.40
   2   4  -6   50.99    5.70
  -2  -4   5  308.77   16.10
   2   4  -5  328.67   16.20
   2   4  -4 1563.14   65.49
  -2  -4   3  660.03   30.30
   2   4  -3  713.13   30.50
  -2  -4   2  620.44   27.40
  -2  -4   2  595.24   24.70
  -2  -4   2  605.94   24.70
   2   4  -2  637.94   27.30
  -2  -4   1  798.92   30.80
  -2  -4   1  759.22   30.60
  -2  -4   1  694.83   32.60
   2   4  -1  731.63   32.70
  -2  -4   0  389.76   17.80
  -2  -4   0  380.86   15.80
   2   4   0  377.96   17.60
   2   4   0  344.57   15.80
  -2  -4  -1    9.20    2.90
  -2  -4  -1   14.10    2.00
   2   4   1   12.50    2.20
   2   4   1   11.30    2.90
  -2  -4  -2  775.72   34.00
  -2  -4  -2  772.52   32.40
   2   4   2  775.82   32.80
   2   4   2  787.02   33.80
  -2  -4  -3  333.37   16.60
  -2  -4  -3  344.07   15.40
   2   4   3  337.87   15.80
   2   4   3  336.27   16.40
  -2  -4  -4  138.99    8.00
  -2  -4  -4  153.68    9.20
   2   4   4  129.59   11.30
   2   4   4  161.08    9.10
  -2  -4  -5    0.90    2.20
  -2  -4  -5    0.00    2.50
   2   4   5    1.70    2.50
   2   4   5    1.80    2.50
  -2  -4  -6   43.00    4.60
  -2  -4  -6   46.50    5.60
   2   4   6   47.50    5.50
   2   4   6   62.49    6.10
  -2  -4  -7    1.60    3.20
  -2  -4  -7   -0.60    2.50
   2   4   7   -0.80    2.70
   2   4   7   -3.90    2.80
  -2  -4  -8  107.29    8.50
  -2  -4  -8  109.69    7.70
   2   4   8   75.29    7.70
   2   4   8  116.79    8.30
  -2  -4  -9  212.78   12.40
  -2  -4  -9  183.68   13.10
   2   4   9  162.48   11.80
   2   4   9  182.28   11.50
  -2  -4 -10  171.38   11.00
  -2  -4 -10  188.48   12.00
   2   4  10  164.18   11.90
   2   4  10  176.38   11.30
  -2  -4 -11   10.50    4.50
   2   4  11    2.60    4.20
  -2  -4 -12   27.50    6.00
   2   4  12   21.90    5.80
  -2  -4 -13    5.90    4.80
   2   4  13   -1.40    4.50
  -2  -4 -14    1.20    4.60
   2   4  14    4.10    5.30
  -2  -4 -15   -3.80    4.80
   2   4  15   -0.80    5.50
  -2  -4 -16    1.50    5.40
   2   4  16   -1.60    5.50
  -2  -4 -17   -0.40    5.30
   2   4  17   -0.30    9.30
  -3  -4  20   32.70    5.00
   3   4 -20   23.60    8.10
   3   4 -20   26.10    5.20
  -3  -4  19   30.30    4.60
   3   4 -19   13.30   11.70
   3   4 -19   32.10    4.60
  -3  -4  18   14.10    3.70
   3   4 -18    3.80    6.60
   3   4 -18   13.70    3.60
  -3  -4  17   21.30    3.80
   3   4 -17   18.90    3.80
   3   4 -17   19.20    7.50
  -3  -4  16   30.40    4.00
   3   4 -16   27.40    4.10
   3   4 -16   31.30    7.70
  -3  -4  15   10.60    2.80
   3   4 -15   10.40    5.70
   3   4 -15   18.00    3.50
  -3  -4  14    1.40    2.20
   3   4 -14   -1.10    2.20
   3   4 -14   -0.30    5.30
  -3  -4  13   26.40    3.10
   3   4 -13   31.30    7.10
   3   4 -13   25.60    3.30
  -3  -4  12  171.68    8.20
   3   4 -12  160.78    8.50
  -3  -4  11    1.00    1.50
   3   4 -11    0.00    4.10
   3   4 -11    2.70    1.70
   3   4 -11    3.00    4.20
  -3  -4  10  338.07   13.90
   3   4 -10  330.47   18.80
   3   4 -10  357.06   18.30
   3   4 -10  296.97   14.00
  -3  -4   9  169.98   11.90
  -3  -4   9  174.68    7.30
   3   4  -9  159.28    7.50
   3   4  -9  176.08   11.60
  -3  -4   8  189.68   12.90
   3   4  -8  259.27   17.40
  -3  -4   7    3.60    3.30
   3   4  -7    5.60    3.40
  -3  -4   6   14.00    3.90
   3   4  -6    8.70    3.40
  -3  -4   5   36.40    5.50
   3   4  -5   41.90    5.30
  -3  -4   4   10.90    3.50
   3   4  -4   18.70    4.20
  -3  -4   3   40.00    2.10
  -3  -4   3   36.60    5.10
  -3  -4   3   41.40    2.10
   3   4  -3   37.20    4.90
  -3  -4   2   91.49    4.30
  -3  -4   2   81.49    4.20
  -3  -4   2   81.59    6.90
   3   4  -2   83.19    6.80
  -3  -4   1   22.00    2.20
  -3  -4   1   20.70    2.20
  -3  -4   1   16.60    3.50
   3   4  -1   19.60    3.90
  -3  -4   0  214.38    9.80
  -3  -4   0  206.38    9.60
  -3  -4   0  191.68   11.50
   3   4   0  211.18   11.50
  -3  -4  -1   73.99    6.70
  -3  -4  -1   88.89    5.50
  -3  -4  -1   75.79    5.00
   3   4   1   87.29    6.60
  -3  -4  -2  279.77   14.40
  -3  -4  -2  282.37   14.00
   3   4   2  265.07   14.10
  -3  -4  -3   24.30    3.30
  -3  -4  -3   22.80    4.20
   3   4   3   22.00    3.40
   3   4   3   25.30    4.00
  -3  -4  -4   43.40    4.30
  -3  -4  -4   36.70    4.90
   3   4   4   36.10    4.50
   3   4   4   43.70    5.30
  -3  -4  -5   19.70    3.50
  -3  -4  -5   15.90    4.00
   3   4   5   16.10    3.60
   3   4   5   13.60    3.70
  -3  -4  -6   28.00    4.90
  -3  -4  -6   35.80    4.60
   3   4   6   24.00    4.30
   3   4   6   27.40    4.50
  -3  -4  -7   77.59    7.80
  -3  -4  -7   90.59    7.40
   3   4   7   82.39    7.80
  -3  -4  -8   18.10    4.70
  -3  -4  -8   15.30    4.70
   3   4   8   11.40    3.80
   3   4   8   10.50    4.20
  -3  -4  -9   17.50    4.30
  -3  -4  -9   17.50    4.80
   3   4   9   15.20    4.30
   3   4   9   14.80    4.60
  -3  -4 -10   13.70    4.90
   3   4  10   18.70    5.20
  -3  -4 -11   18.90    5.20
   3   4  11   12.50    5.20
  -3  -4 -12   21.20    5.80
   3   4  12   27.40    6.50
  -3  -4 -13   14.30    5.70
   3   4  13   15.30    6.00
  -3  -4 -14    0.50    5.00
   3   4  14   -4.40    5.10
  -3  -4 -15    0.70    5.30
   3   4  15    1.70    5.40
  -3  -4 -16    3.10    5.40
   3   4  16    5.70    8.40
  -4  -4  18   -4.70    2.60
   4   4 -18    7.00    6.60
   4   4 -18   -5.90    2.50
  -4  -4  17    1.50    2.70
   4   4 -17   -0.40    2.50
   4   4 -17   -2.80    5.80
  -4  -4  16    0.70    2.50
   4   4 -16    2.60    6.10
   4   4 -16   -2.70    2.30
   4   4 -15   -3.60    2.20
   4   4 -15   -3.80    5.20
  -4  -4  14    6.00    2.20
   4   4 -14    5.10    5.80
  -4  -4  13  129.99    6.70
   4   4 -13  110.89    7.00
   4   4 -13  139.49   13.30
  -4  -4  12   49.90    3.70
   4   4 -12   42.30    7.50
   4   4 -12   46.50    3.90
  -4  -4  11  650.43   25.40
   4   4 -11  642.74   31.20
   4   4 -11  556.94   25.60
  -4  -4  10    5.20    1.30
   4   4 -10    4.00    1.40
  -4  -4   9  244.88   10.10
  -4  -4   8    5.80    4.20
   4   4  -8   -0.70    3.70
  -4  -4   7    3.00    3.80
   4   4  -7    4.00    3.80
  -4  -4   6  141.89   10.60
   4   4  -6  145.09   10.40
  -4  -4   5  804.42   31.50
  -4  -4   5  751.52   31.50
  -4  -4   5  793.72   35.80
  -4  -4   4    3.80    1.20
  -4  -4   4    3.40    1.10
  -4  -4   4    2.90    3.70
   4   4  -4    3.90    3.40
  -4  -4   3   15.00    1.90
  -4  -4   3   19.00    4.60
  -4  -4   3   13.90    1.80
   4   4  -3   16.50    4.10
  -4  -4   2   63.39    7.00
  -4  -4   2   70.09    4.30
  -4  -4   2   72.49    4.40
   4   4  -2   67.99    7.00
  -4  -4   1  610.24   25.90
  -4  -4   1  598.74   28.30
  -4  -4   1  617.34   25.80
   4   4  -1  618.94   28.10
  -4  -4   0   51.39    4.30
  -4  -4   0   40.50    5.60
  -4  -4   0   48.40    4.10
   4   4   0   46.00    5.40
  -4  -4  -1  627.94   27.30
  -4  -4  -1  666.63   27.60
  -4  -4  -1  612.24   29.10
   4   4   1  636.34   28.90
  -4  -4  -2   25.70    4.70
  -4  -4  -2   27.60    3.60
  -4  -4  -2   26.70    3.80
   4   4   2   36.10    5.00
  -4  -4  -3  323.47   17.00
  -4  -4  -3  323.07   16.10
  -4  -4  -3  318.67   15.60
   4   4   3  355.96   16.90
  -4  -4  -4   39.50    5.40
  -4  -4  -4   52.99    5.20
  -4  -4  -4   51.09    5.70
   4   4   4   43.40    5.40
  -4  -4  -5  136.09    9.40
  -4  -4  -5  132.89    8.50
  -4  -4  -5  113.89    9.20
  -4  -4  -6   12.40    4.00
  -4  -4  -6   13.30    3.70
   4   4   6   11.80    3.90
  -4  -4  -7    2.80    3.30
  -4  -4  -7    4.40    3.70
   4   4   7   10.60    4.10
   4   4   7   10.40    3.80
  -4  -4  -8    3.30    3.30
  -4  -4  -8   -0.40    3.50
   4   4   8    1.60    3.70
   4   4   8    0.60    3.20
  -4  -4  -9   -0.70    3.60
  -4  -4 -10    1.00    3.90
   4   4  10    7.60    4.70
  -4  -4 -11    0.20    4.40
   4   4  11   -1.80    4.10
  -4  -4 -12    4.00    4.80
   4   4  12    1.20    4.80
  -4  -4 -13    7.60    5.40
   4   4  13    0.50    5.50
  -4  -4 -14   -1.80    4.80
   4   4  14   -0.50    5.30
  -5  -4  15    0.90    2.10
   5   4 -15    0.30    2.60
   5   4 -15   -5.60    5.70
  -5  -4  14    3.60    2.00
   5   4 -14    1.30    2.00
   5   4 -14    3.50    5.80
  -5  -4  13   -0.60    1.70
   5   4 -13    5.10    5.90
   5   4 -13    0.60    1.70
  -5  -4  12   -1.10    1.50
   5   4 -12    1.10    5.30
   5   4 -12    0.00    1.60
  -5  -4  11   -0.30    1.30
   5   4 -11    0.40    5.40
  -5  -4  10  115.49    5.20
  -5  -4  10  110.49    5.20
   5   4 -10  107.19   11.10
  -5  -4   9  102.49    4.50
   5   4  -9   91.39   10.60
  -5  -4   8   71.89    3.40
  -5  -4   7    3.00    1.10
  -5  -4   7    0.50    4.20
  -5  -4   7    0.60    1.00
  -5  -4   6   50.69    3.10
  -5  -4   6   57.09    7.70
  -5  -4   6   49.40    2.90
   5   4  -6   56.39    7.10
  -5  -4   5    8.60    1.70
  -5  -4   5    9.20    4.50
  -5  -4   5    5.50    1.40
   5   4  -5   10.20    4.20
  -5  -4   4   -1.20    1.50
  -5  -4   4    1.30    1.50
  -5  -4   4    0.80    3.70
   5   4  -4   -1.20    3.20
  -5  -4   3   13.20    4.60
  -5  -4   3   12.10    2.10
  -5  -4   3    9.30    2.10
   5   4  -3   13.50    4.10
  -5  -4   2    2.80    3.80
  -5  -4   2    4.20    2.00
  -5  -4   2    5.30    2.10
   5   4  -2    3.80    3.50
  -5  -4   1    4.50    2.10
  -5  -4   1   -1.20    3.40
   5   4  -1    2.20    3.30
  -5  -4   0  156.28    8.50
  -5  -4   0  151.98   10.80
   5   4   0  150.38   10.20
  -5  -4  -1   24.50    3.70
  -5  -4  -1   26.10    3.60
  -5  -4  -1   13.40    4.40
   5   4   1   26.00    4.80
  -5  -4  -2    6.20    3.80
  -5  -4  -2    8.70    3.20
  -5  -4  -2    9.00    3.00
   5   4   2    7.90    3.50
  -5  -4  -3   10.00    3.60
  -5  -4  -3    7.50    3.10
  -5  -4  -3    0.00    3.50
   5   4   3    8.50    3.70
  -5  -4  -4   29.20    5.40
  -5  -4  -4   34.10    4.70
  -5  -4  -4   30.90    4.90
   5   4   4   33.60    4.90
  -5  -4  -5   51.29    6.70
  -5  -4  -5   77.79    7.30
  -5  -4  -5   59.29    6.60
   5   4   5   66.39    6.70
  -5  -4  -6   25.90    4.40
  -5  -4  -6   30.00    5.50
  -5  -4  -6   16.10    4.70
   5   4   6   21.70    4.70
  -5  -4  -7   -2.90    3.80
  -5  -4  -7   -2.40    3.40
  -5  -4  -8    3.00    4.60
  -5  -4  -9    0.40    4.00
  -5  -4  -9   -5.20    4.50
  -5  -4 -10    7.00    4.60
  -5  -4 -10    4.80    5.30
  -5  -4 -11   13.50    5.30
  -5  -4 -11   14.40    6.00
  -6  -4  13   41.40    2.60
   6   4 -13   65.39    9.60
   6   4 -12    6.70    6.50
  -6  -4  11   -0.30    0.40
   6   4 -11   -8.00    5.40
   6   4 -10   13.50    6.50
   6   4  -9  300.17   19.30
  -6  -4   8  226.08    9.30
  -6  -4   8  211.68    9.30
   6   4  -8  203.48   16.00
  -6  -4   7  243.78   10.90
  -6  -4   7  254.67   10.80
   6   4  -7  270.07   17.30
  -6  -4   6   34.70    6.90
  -6  -4   6   36.90    3.00
  -6  -4   6   37.00    3.00
  -6  -4   5   13.50    2.20
  -6  -4   5   16.80    5.70
  -6  -4   5   15.00    2.20
  -6  -4   4   38.00    3.40
  -6  -4   4   45.90    3.70
  -6  -4   3  107.99   10.70
  -6  -4   3  129.19    6.90
  -6  -4   2    3.20    4.50
  -6  -4   2   13.30    2.80
  -6  -4   1   82.19    6.10
  -6  -4   1   85.19    6.20
  -6  -4   1   69.49    8.30
   6   4  -1  103.89    8.40
  -6  -4   0    5.30    2.90
  -6  -4   0   -4.50    3.30
  -6  -4   0    3.30    2.70
   6   4   0   -0.10    3.30
  -6  -4  -1   37.20    4.40
  -6  -4  -1   29.90    5.60
  -6  -4  -1   27.80    4.40
   6   4   1   23.70    4.70
  -6  -4  -2   16.80    3.60
  -6  -4  -2   14.50    4.70
  -6  -4  -2   12.10    3.90
   6   4   2    7.40    3.70
  -6  -4  -3   63.09    7.60
  -6  -4  -3   64.59    6.70
   6   4   3   57.19    6.90
  -6  -4  -4   -0.80    2.90
  -6  -4  -4   -2.50    3.50
  -6  -4  -4    6.80    4.00
  -6  -4  -5   56.09    8.50
  -6  -4  -5   44.00    6.30
  -6  -4  -6   23.40    5.30
  -6  -4  -6   36.00    6.10
  -6  -4  -7   -3.10    4.10
  -6  -4  -7   -0.70    4.00
  -6  -4  -8    2.60    4.20
  -6  -4  -8    2.50    4.90
  -7  -4   6   -1.30    1.50
   7   4  -6   -0.20    5.30
  -7  -4   5    7.20    3.00
  -7  -4   5    4.60    2.00
  -7  -4   4    1.50    2.20
  -7  -4   4    0.00    2.10
  -7  -4   4   -1.70    4.10
  -7  -4   3    0.10    2.30
  -7  -4   3    3.70    2.40
  -7  -4   3   -4.40    4.20
  -7  -4   2    4.10    4.60
  -7  -4   2    9.00    2.70
  -7  -4   2    2.90    2.70
  -7  -4   1    9.90    5.00
  -7  -4   1    5.80    2.70
  -7  -4   1    6.90    3.00
  -7  -4   0    5.20    2.90
  -7  -4   0    9.80    3.50
  -7  -4   0    8.50    4.70
  -7  -4  -1    4.40    3.30
  -7  -4  -1    4.20    4.30
  -9   5  -7   -1.10    6.10
  -9   5  -6    0.80    6.00
  -9   5  -4    5.10    5.70
  -9   5  -3   -3.30    5.20
  -9   5  -2   -2.30    5.60
  -9   5  -1   62.59    8.20
  -9   5   0    6.60    5.30
  -9   5   1   51.59    7.80
  -9   5   2   36.70    6.80
  -9   5   3   16.80    5.90
  -9   5   4    8.00    5.40
   9  -5  -5   14.00    2.50
   9  -5  -5   11.50    2.30
  -9   5   5   17.60    5.60
   9  -5  -6   12.70    3.10
  -9   5   6   10.70    5.30
   9  -5  -7   -0.20    2.70
  -9   5   7   -9.60    7.70
  -8   5 -12    2.70    6.80
  -8   5 -11   14.40    7.50
  -8   5 -10    2.20    7.10
  -8   5  -9   26.70    7.70
  -8   5  -8   -0.70    5.80
  -8   5  -7   59.69    9.00
  -8   5  -6   49.50    7.90
  -8   5  -5    3.60    5.10
  -8   5  -4   10.40    5.50
  -8   5  -3   37.60    6.60
  -8   5  -2  124.19   11.50
  -8   5  -1   54.39    7.60
  -8   5   0  163.48   12.00
  -8   5   1    0.90    4.20
  -8   5   2   93.49    9.20
   8  -5  -3  109.49    5.90
   8  -5  -3  123.39    6.20
  -8   5   3  125.19   10.20
   8  -5  -4    1.60    2.40
   8  -5  -4    0.60    2.00
  -8   5   4    2.50    4.20
   8  -5  -5   43.40    4.80
  -8   5   5   33.60    6.30
   8  -5  -6   74.19    6.20
   8  -5  -6   91.49    7.10
  -8   5   6   71.19    8.10
   8  -5  -7    4.90    3.20
   8  -5  -7    4.30    3.30
  -8   5   7    6.50    4.30
   8  -5  -8   -3.50    3.10
   8  -5  -8   -0.80    3.30
  -8   5   8    6.10    4.80
   8  -5  -9   29.10    5.20
   8  -5  -9   52.09    6.50
  -8   5   9   28.10    6.10
   8  -5 -10   28.60    5.30
  -8   5  10   35.00    6.70
   8  -5 -11   15.60    5.10
  -8   5  11   20.20    9.40
  -7   5 -15   17.30    7.50
  -7   5 -15    7.10    1.70
  -7   5 -14    6.20    7.00
  -7   5 -13    8.60    6.70
  -7   5 -12    3.40    6.20
  -7   5 -11    4.60    6.00
  -7   5 -10   -8.90    4.60
  -7   5  -9  207.28   15.10
  -7   5  -8  122.39   11.30
  -7   5  -7   45.20    7.40
  -7   5  -6   20.50    5.70
  -7   5  -5  116.99   10.70
  -7   5  -4    9.30    4.70
  -7   5  -3   97.39    9.20
  -7   5  -2   13.10    4.60
  -7   5  -1   12.30    4.70
  -7   5   0    9.90    4.30
   7  -5  -1  143.59    6.80
   7  -5  -1  155.58    7.00
  -7   5   1  169.48   10.90
   7  -5  -2  120.89    6.20
   7  -5  -2  121.69    6.70
  -7   5   2  104.89    9.30
   7  -5  -3  108.59    6.40
  -7   5   3  113.79    9.20
   7  -5  -4   43.20    4.10
  -7   5   4   49.50    5.40
  -7   5   4   32.90    5.50
   7  -5  -5  198.18   10.90
  -7   5   5  238.78   13.30
  -7   5   5  208.08   12.20
   7  -5  -6   33.80    4.40
  -7   5   6   26.00    4.90
  -7   5   6   33.90    5.80
   7  -5  -7   38.90    5.00
  -7   5   7   45.20    6.50
  -7   5   7   37.50    5.90
   7  -5  -8   54.19    6.10
  -7   5   8   48.80    6.70
  -7   5   8   43.60    6.80
   7  -5  -9    4.20    3.80
  -7   5   9   11.40    4.50
  -7   5   9   20.90    5.40
   7  -5 -10    1.00    3.70
  -7   5  10   -0.70    4.20
  -7   5  10    2.00    4.40
   7  -5 -11    2.80    4.30
  -7   5  11   -1.70    4.60
   7  -5 -12   14.50    5.30
  -7   5  12   16.10    5.40
   7  -5 -13    8.60    5.20
  -7   5  13    1.10    4.80
   7  -5 -14   16.90    6.00
  -7   5  14    4.20    5.20
  -6   5 -17    3.60    3.50
  -6   5 -17    3.90    2.80
  -6   5 -17   -2.30    5.30
  -6   5 -16    2.90    6.20
  -6   5 -16    0.00    2.50
  -6   5 -16    2.50    3.30
  -6   5 -15   -2.60    5.60
  -6   5 -15    1.60    2.50
  -6   5 -15   -2.20    2.70
  -6   5 -14   34.70    7.90
  -6   5 -14   36.70    4.30
  -6   5 -13   17.20    6.60
  -6   5 -13   12.80    3.00
  -6   5 -13   12.70    2.70
  -6   5 -12    3.30    2.10
  -6   5 -12    0.90    5.50
  -6   5 -12    2.90    2.10
  -6   5 -11  109.29   11.00
  -6   5 -11   88.49    5.30
  -6   5 -11   90.69    5.20
  -6   5 -10    0.20    1.20
  -6   5 -10    1.40    1.20
  -6   5 -10   -0.70    4.80
  -6   5  -9  274.97   16.90
  -6   5  -8  243.28   15.30
  -6   5  -7   33.60    9.40
  -6   5  -6    3.70    4.00
   6  -5   5   34.60    5.40
  -6   5  -5   43.50    6.60
   6  -5   4  124.59    9.40
  -6   5  -4  135.79    9.90
   6  -5   3  348.27   17.90
  -6   5  -3  338.27   17.90
  -6   5  -2  124.89    9.10
   6  -5   1   56.09    6.30
   6  -5   1   56.99    3.10
  -6   5  -1   50.69    6.40
  -6   5  -1   58.79    3.40
   6  -5   0    1.60    1.30
   6  -5   0    4.60    3.50
  -6   5   0   -0.30    3.20
  -6   5   0    0.10    1.60
   6  -5  -1  722.63   30.10
   6  -5  -1  725.23   32.90
  -6   5   1  701.03   32.40
  -6   5   1  735.53   30.80
   6  -5  -2  368.36   18.10
   6  -5  -2  336.17   15.60
  -6   5   2  331.27   16.30
  -6   5   2  371.36   18.00
   6  -5  -3  772.92   33.20
   6  -5  -3  693.83   30.80
  -6   5   3  717.43   31.80
  -6   5   3  732.13   32.60
   6  -5  -4   78.49    7.40
  -6   5   4   72.79    6.90
  -6   5   4   62.99    6.30
   6  -5  -5  189.18   10.20
  -6   5   5  205.98   11.40
  -6   5   5  159.58   11.10
   6  -5  -6  359.46   17.00
  -6   5   6  346.77   17.90
  -6   5   6  341.27   19.20
   6  -5  -7   84.49    7.30
  -6   5   7   81.89    7.90
  -6   5   7   78.69    7.40
   6  -5  -8   47.70    5.90
  -6   5   8   39.60    6.30
  -6   5   8   47.40    6.30
   6  -5  -9  190.68   11.90
  -6   5   9  190.98   12.10
  -6   5   9  177.08   12.40
   6  -5 -10   -1.70    3.60
  -6   5  10    4.10    3.90
  -6   5  10   -2.00    4.10
   6  -5 -11   -2.90    4.10
  -6   5  11    0.80    4.10
   6  -5 -12    3.00    4.40
  -6   5  12   -1.90    4.40
   6  -5 -13   25.40    6.40
  -6   5  13   33.00    6.40
   6  -5 -14    8.10    5.60
  -6   5  14   -5.70    4.80
   6  -5 -15   61.69    9.00
  -6   5  15   45.60    7.80
   6  -5 -16   27.60    7.70
  -6   5  16   18.60    6.10
  -5   5 -19   -3.50    5.80
  -5   5 -19    7.20    5.30
  -5   5 -18   12.50    4.20
  -5   5 -18   20.80    7.60
  -5   5 -18    7.70    4.90
  -5   5 -17   25.30    5.60
  -5   5 -17   16.00    4.40
  -5   5 -17   15.20    6.80
  -5   5 -16  137.79    9.60
  -5   5 -16  116.69   12.00
  -5   5 -16  118.79   10.00
  -5   5 -15    5.10    5.50
  -5   5 -15    4.70    3.70
  -5   5 -15    9.70    3.60
  -5   5 -14   49.60    8.40
  -5   5 -14   63.59    6.60
  -5   5 -14   56.79    5.90
  -5   5 -13   -0.60    4.50
  -5   5 -13    4.70    2.80
  -5   5 -13    2.30    3.20
  -5   5 -12    1.50    4.60
  -5   5 -12   -1.20    2.30
  -5   5 -11   31.30    4.00
  -5   5 -11   26.40    4.00
  -5   5 -10  158.88    8.90
  -5   5 -10  173.38    9.30
  -5   5 -10  160.98   15.10
  -5   5 -10  167.58   12.20
  -5   5  -9    4.80    2.00
  -5   5  -9    3.90    3.50
  -5   5  -9    2.70    3.90
  -5   5  -9    1.60    2.20
  -5   5  -8   86.19    5.40
  -5   5  -8   96.69    7.80
  -5   5  -8   80.79    8.30
  -5   5  -8  103.59    6.00
  -5   5  -7  384.06   16.80
  -5   5  -7  382.16   17.20
  -5   5  -7  417.96   19.40
  -5   5  -7  393.06   20.10
   5  -5   6  788.92   38.60
  -5   5  -6  763.72   34.70
  -5   5  -6  760.12   31.90
  -5   5  -6  761.12   31.50
   5  -5   5   24.80    4.30
  -5   5  -5   37.60    5.50
  -5   5  -5   36.00    3.10
  -5   5  -5   34.10    2.60
   5  -5   4  240.48   13.20
  -5   5  -4  237.58   13.50
  -5   5  -4  247.98   10.70
   5  -5   3  162.68    9.60
   5  -5   3  151.88    7.10
  -5   5  -3  144.29    7.00
  -5   5  -3  140.09    9.60
   5  -5   2    5.40    1.50
   5  -5   2    8.10    3.00
  -5   5  -2    6.40    1.60
  -5   5  -2    7.40    3.00
   5  -5   1    3.30    1.50
   5  -5   1    2.00    2.80
  -5   5  -1    2.30    1.60
  -5   5  -1    2.20    2.80
   5  -5   0  366.06   16.20
   5  -5   0  380.56   18.20
  -5   5   0  372.56   16.60
  -5   5   0  371.36   18.10
   5  -5  -1   11.70    3.20
   5  -5  -1    5.90    1.90
  -5   5   1    6.80    2.20
  -5   5   1    7.00    3.20
   5  -5  -2  108.79    7.60
   5  -5  -2  100.29    6.10
  -5   5   2   97.49    6.50
  -5   5   2  104.29    7.60
   5  -5  -3   79.39    6.90
   5  -5  -3   83.19    5.70
  -5   5   3   97.59    7.10
  -5   5   3   84.39    6.20
   5  -5  -4  299.57   14.70
   5  -5  -4  351.66   20.60
  -5   5   4  292.17   15.50
  -5   5   4  314.17   15.30
   5  -5  -5   68.59    6.70
   5  -5  -5   84.79    6.30
  -5   5   5   82.99    7.30
  -5   5   5   74.59    6.60
   5  -5  -6  420.36   19.60
   5  -5  -6  418.36   20.40
  -5   5   6  411.96   20.20
  -5   5   6  412.26   20.10
   5  -5  -7   98.69    8.50
   5  -5  -7   71.79    6.70
  -5   5   7   74.79    7.30
  -5   5   7   75.49    7.60
   5  -5  -8   18.90    4.40
  -5   5   8   14.10    3.90
  -5   5   8   25.70    4.90
   5  -5  -9   19.10    4.60
  -5   5   9   11.50    4.50
   5  -5 -10   61.39    7.20
  -5   5  10   58.29    6.60
  -5   5  10   59.49    7.60
   5  -5 -11    5.60    4.30
  -5   5  11    3.20    3.80
   5  -5 -12   17.40    5.40
  -5   5  12   12.50    4.90
   5  -5 -13   20.70    6.20
  -5   5  13   25.10    5.80
   5  -5 -14   -3.80    4.70
  -5   5  14    3.70    4.70
   5  -5 -15    2.30    5.50
  -5   5  15   -3.40    4.20
   5  -5 -16   -1.30    5.30
  -5   5  16    8.20    5.40
  -5   5  17   -4.30    5.00
  -4   5 -20   -1.40    5.10
  -4   5 -19    9.50    6.30
  -4   5 -19   16.40    6.00
  -4   5 -18    4.90    6.00
  -4   5 -17   47.00    6.70
  -4   5 -17   74.19    8.70
  -4   5 -17   49.30    8.30
  -4   5 -16    2.70    4.80
  -4   5 -16    6.00    4.40
  -4   5 -16    9.30    3.90
  -4   5 -15   97.29   10.20
  -4   5 -15  133.39   10.40
  -4   5 -15  116.59    9.20
  -4   5 -14   -0.90    3.00
  -4   5 -14    2.40    4.40
  -4   5 -14    3.20    3.80
  -4   5 -13   99.49    9.50
  -4   5 -13  101.69    8.80
  -4   5 -13   81.99    7.60
  -4   5 -12   22.70    4.70
  -4   5 -12   32.90    5.20
  -4   5 -12   30.10    4.50
  -4   5 -12   31.70    6.10
  -4   5 -11  137.99    9.00
  -4   5 -11  149.39    9.80
  -4   5 -11  136.69   10.60
  -4   5 -11  151.78    9.70
  -4   5 -10   63.39    7.00
  -4   5 -10   73.89    6.00
  -4   5 -10   77.09    6.60
  -4   5 -10   57.09    8.50
  -4   5  -9    7.80    3.00
  -4   5  -9   10.50    3.10
  -4   5  -9   10.90    2.80
  -4   5  -9   13.00    4.40
  -4   5  -8  154.78    8.40
  -4   5  -8  147.79   10.30
  -4   5  -8  152.68    9.00
  -4   5  -8  156.38    9.30
  -4   5  -7 1625.14   66.19
  -4   5  -7 1591.74   65.09
  -4   5  -7 1591.44   66.89
  -4   5  -7 1537.35   65.59
   4  -5   6    9.00    3.00
   4  -5   6    7.20    2.20
  -4   5  -6    8.30    3.30
  -4   5  -6    4.20    1.90
   4  -5   5 3389.66  138.09
   4  -5   4  220.78   10.50
   4  -5   4  221.48   11.80
  -4   5  -4  228.58   10.40
  -4   5  -4  208.78   12.00
   4  -5   3  260.87   13.20
   4  -5   3  254.17   11.90
  -4   5  -3  258.07   11.90
  -4   5  -3  272.27   13.60
   4  -5   2  197.28    9.40
   4  -5   2  187.08   10.70
  -4   5  -2  199.58    9.50
  -4   5  -2  205.68   10.90
   4  -5   1  380.36   17.20
   4  -5   1  413.46   18.60
  -4   5  -1  381.96   17.30
  -4   5  -1  406.76   18.60
   4  -5   0  232.78   12.40
   4  -5   0  236.38   11.30
  -4   5   0  229.98   12.30
  -4   5   0  263.07   11.70
   4  -5  -1 2207.18   92.79
  -4   5   1 2308.07   92.09
   4  -5  -2   17.90    2.80
   4  -5  -2   21.50    3.50
  -4   5   2   20.70    3.60
   4  -5  -3   65.49    5.60
   4  -5  -3   70.39    5.80
  -4   5   3   54.59    5.20
  -4   5   3   66.79    5.30
   4  -5  -4    5.00    2.60
   4  -5  -4   -1.30    2.10
  -4   5   4    3.40    2.70
  -4   5   4    1.70    2.30
   4  -5  -5 1084.09   46.30
   4  -5  -5 1043.30   45.90
  -4   5   5 1143.69   46.40
  -4   5   5 1064.59   46.10
   4  -5  -6  321.67   15.80
   4  -5  -6  306.77   15.80
  -4   5   6  296.07   15.60
  -4   5   6  332.57   16.20
   4  -5  -7  766.82   34.20
   4  -5  -7  779.22   34.50
  -4   5   7  768.42   34.10
  -4   5   7  787.92   34.70
   4  -5  -8   16.20    3.90
   4  -5  -8   22.60    4.30
  -4   5   8   23.10    4.50
  -4   5   8   14.70    4.00
   4  -5  -9  152.38    9.80
   4  -5  -9  137.89    9.90
  -4   5   9  117.49    9.00
  -4   5   9  123.29   13.20
   4  -5 -10    4.80    3.70
  -4   5  10    0.20    3.50
  -4   5  10    3.40    3.50
   4  -5 -11  135.59   10.50
  -4   5  11  134.69    9.70
  -4   5  11  116.29   12.50
   4  -5 -12    4.10    4.50
  -4   5  12    4.80    4.10
   4  -5 -13   -2.10    4.50
  -4   5  13   -1.30    3.70
   4  -5 -14    0.80    5.10
  -4   5  14    5.10    4.50
   4  -5 -15    1.80    5.40
  -4   5  15   -0.60    4.30
   4  -5 -16    4.40    6.10
  -4   5  16    6.10    5.40
   4  -5 -17   13.10    6.50
  -4   5  17    9.00    6.90
   4  -5 -18    1.80    6.20
  -4   5  18    7.10    5.70
  -3   5 -21   -1.40    5.50
  -3   5 -21   -0.40    5.50
  -3   5 -20    2.10    5.60
  -3   5 -20    1.90    5.30
  -3   5 -19   51.39    7.90
  -3   5 -19   65.69    9.50
  -3   5 -18   -2.20    5.00
  -3   5 -18   -4.60    4.50
  -3   5 -17    1.90    4.60
  -3   5 -17   -0.50    4.50
  -3   5 -16    7.60    5.00
  -3   5 -16   15.20    5.30
  -3   5 -16    7.80    4.20
  -3   5 -15    2.30    4.30
  -3   5 -15    2.90    4.30
  -3   5 -15    2.40    3.50
  -3   5 -14  360.36   20.00
  -3   5 -14  379.46   18.90
  -3   5 -14  376.86   19.50
  -3   5 -14  377.06   20.30
  -3   5 -13  265.07   16.20
  -3   5 -13  288.57   16.40
  -3   5 -13  288.17   15.80
  -3   5 -13  308.27   15.30
  -3   5 -12   31.40    5.40
  -3   5 -12   26.80    5.10
  -3   5 -12   36.90    5.20
  -3   5 -12   37.60    5.00
  -3   5 -11   17.40    4.50
  -3   5 -11   28.60    4.40
  -3   5 -11   21.40    3.90
  -3   5 -11   28.90    4.90
  -3   5 -10    0.80    2.40
  -3   5 -10    2.40    2.60
  -3   5 -10   -0.60    3.00
  -3   5 -10   -0.40    2.80
  -3   5  -9   94.59    6.80
  -3   5  -9   92.69    7.30
  -3   5  -9   91.19    7.20
  -3   5  -9   83.89    6.30
  -3   5  -8   65.49    5.40
  -3   5  -8   58.69    5.40
  -3   5  -8   65.19    6.50
   3  -5   7   10.30    2.70
  -3   5  -7    8.40    2.50
  -3   5  -7   12.10    2.60
  -3   5  -7   18.00    3.70
   3  -5   6   71.89    5.70
   3  -5   6   73.89    5.50
  -3   5  -6   81.29    6.20
  -3   5  -6   77.09    5.40
   3  -5   5   11.80    2.40
   3  -5   5    4.40    2.40
  -3   5  -5    7.20    2.80
  -3   5  -5    8.00    2.20
   3  -5   4 1634.44   67.69
   3  -5   4 1609.44   67.29
  -3   5  -4 1680.63   67.39
  -3   5  -4 1642.04   67.99
   3  -5   3  538.75   22.60
   3  -5   3  478.75   21.90
  -3   5  -3  503.55   22.10
  -3   5  -3  512.75   22.60
   3  -5   2  205.68   10.20
   3  -5   2  218.78   10.80
  -3   5  -2  208.58   10.30
  -3   5  -2  218.18   10.90
   3  -5   1   25.40    3.30
   3  -5   1   31.80    3.20
  -3   5  -1   20.90    2.70
  -3   5  -1   20.50    3.20
   3  -5   0  201.88   10.20
   3  -5   0  205.98   10.60
  -3   5   0  208.78   10.40
  -3   5   0  220.88   10.80
   3  -5  -1   40.40    3.90
   3  -5  -1   39.00    3.80
  -3   5   1   38.40    4.00
   3  -5  -2  161.78    8.90
   3  -5  -2  168.78    8.90
  -3   5   2  163.98    8.90
  -3   5   2  158.78    8.90
   3  -5  -3   35.30    4.00
   3  -5  -3   37.40    4.20
  -3   5   3   45.40    4.30
  -3   5   3   44.60    4.50
   3  -5  -4   72.79    5.40
   3  -5  -4   62.19    5.30
  -3   5   4   61.79    5.30
  -3   5   4   55.99    5.30
   3  -5  -5    5.60    2.60
   3  -5  -5    8.40    2.90
  -3   5   5    8.10    2.70
  -3   5   5    8.60    2.90
   3  -5  -6  416.76   20.70
   3  -5  -6  438.96   20.60
  -3   5   6  469.95   21.10
  -3   5   6  449.66   20.60
   3  -5  -7   96.19    7.30
   3  -5  -7   79.49    6.80
  -3   5   7   97.79    7.10
  -3   5   7   81.49    7.20
   3  -5  -8   37.50    5.40
   3  -5  -8   23.20    5.80
  -3   5   8   25.20    4.30
  -3   5   8   44.50    5.60
   3  -5  -9    1.30    3.30
   3  -5  -9    0.00    3.10
  -3   5   9    3.70    4.20
  -3   5   9   -0.90    2.90
   3  -5 -10   38.60    5.90
   3  -5 -10   43.20    6.10
  -3   5  10   55.99    6.90
  -3   5  10   55.79    6.40
   3  -5 -11   47.80    6.90
  -3   5  11   36.70    5.70
  -3   5  11   53.69    7.10
   3  -5 -12   66.39    8.10
  -3   5  12   78.19    7.80
   3  -5 -13   13.90    5.70
  -3   5  13   19.40    4.90
   3  -5 -14    9.00    5.30
  -3   5  14    6.50    4.20
   3  -5 -15   -0.50    5.40
  -3   5  15    1.80    4.30
   3  -5 -16   10.20    6.30
  -3   5  16   11.90    5.00
   3  -5 -17    1.90    6.00
  -3   5  17    3.60    5.30
   3  -5 -18    5.70    6.70
  -3   5  18    1.90    5.60
  -2   5 -21   -5.40    5.50
  -2   5 -20   19.40    6.70
  -2   5 -19   15.60    6.30
  -2   5 -18   43.40    8.10
  -2   5 -17   22.40    6.50
  -2   5 -16  199.58   13.50
  -2   5 -16  192.68   19.40
  -2   5 -16  204.98   14.70
  -2   5 -16  222.58   12.80
  -2   5 -15  227.98   15.60
  -2   5 -15  266.17   15.50
  -2   5 -15  246.28   13.70
  -2   5 -15  239.08   14.70
  -2   5 -14  568.84   28.20
  -2   5 -14  558.84   25.80
  -2   5 -14  539.65   26.70
  -2   5 -14  583.14   27.60
  -2   5 -13  744.93   33.70
  -2   5 -13  722.83   32.20
  -2   5 -13  705.53   33.10
  -2   5 -13  738.73   34.30
  -2   5 -12  672.13   30.20
  -2   5 -12  638.04   28.70
  -2   5 -12  669.73   30.80
  -2   5 -12  611.54   29.50
  -2   5 -11   18.50    4.30
  -2   5 -11   21.60    3.40
  -2   5 -11   16.40    4.50
  -2   5 -11   24.70    4.40
  -2   5 -10  340.37   16.60
  -2   5 -10  305.67   15.90
  -2   5 -10  309.37   15.30
  -2   5 -10  334.27   17.10
   2  -5   9  564.04   25.10
  -2   5  -9  546.55   24.90
  -2   5  -9  528.45   23.90
  -2   5  -9  530.35   24.40
   2  -5   8 1444.86   59.49
  -2   5  -8 1364.96   58.39
  -2   5  -8 1352.46   58.99
  -2   5  -8 1500.45   59.59
   2  -5   7  510.55   22.80
  -2   5  -7  496.55   21.60
  -2   5  -7  518.55   22.60
  -2   5  -7  457.15   22.00
   2  -5   6  160.58    8.80
  -2   5  -6  140.99    8.30
  -2   5  -6  155.98    8.70
   2  -5   5   69.09    4.80
   2  -5   5   61.09    5.10
  -2   5  -5   74.39    5.10
  -2   5  -5   68.59    5.30
   2  -5   4 1219.78   50.59
   2  -5   4 1218.08   50.09
  -2   5  -4 1200.48   50.29
   2  -5   3 3131.79  154.28
   2  -5   3 3251.17  146.69
  -2   5  -3 3184.98  164.78
  -2   5  -3 3199.78  147.79
   2  -5   2 5204.58  234.88
   2  -5   2 5535.55  245.18
  -2   5  -2 5547.34  236.58
   2  -5   1 1196.08   47.60
   2  -5   1 1104.39   47.80
  -2   5  -1 1177.58   48.90
  -2   5  -1 1122.19   47.60
   2  -5   0  135.09    8.00
   2  -5   0  141.79    7.80
  -2   5   0  154.08    7.90
  -2   5   0  129.79    7.50
   2  -5  -1   35.60    3.50
   2  -5  -1   43.90    4.70
  -2   5   1   54.99    4.70
  -2   5   1   49.60    4.20
   2  -5  -2   93.69    5.70
   2  -5  -2   90.49    6.20
  -2   5   2   91.69    6.20
   2  -5  -3  273.77   13.80
   2  -5  -3  301.57   13.30
  -2   5   3  255.67   13.50
  -2   5   3  280.37   13.30
   2  -5  -4  735.73   32.70
   2  -5  -4  729.83   32.10
  -2   5   4  789.32   32.90
  -2   5   4  748.13   32.20
   2  -5  -5  210.08   10.60
   2  -5  -5  206.68   11.10
  -2   5   5  200.68   10.60
  -2   5   5  188.68   10.90
   2  -5  -6    0.60    2.60
   2  -5  -6   -0.30    2.10
  -2   5   6    0.90    2.50
  -2   5   6    4.40    2.80
   2  -5  -7  182.88   10.30
   2  -5  -7  176.68   10.80
  -2   5   7  176.78   10.40
  -2   5   7  190.28   10.90
   2  -5  -8  306.17   15.30
   2  -5  -8  295.57   15.70
  -2   5   8  283.07   15.30
  -2   5   8  320.87   16.00
   2  -5  -9   17.70    4.40
   2  -5  -9   13.70    4.40
  -2   5   9   19.00    4.20
  -2   5   9   20.20    4.60
   2  -5 -10   45.40    6.10
   2  -5 -10   34.20    5.20
  -2   5  10   51.29    6.50
  -2   5  10   32.10    5.00
   2  -5 -11   67.09    7.80
   2  -5 -11   82.59    8.40
  -2   5  11   65.59    9.20
  -2   5  11   66.59    7.40
   2  -5 -12   30.60    6.10
  -2   5  12   34.10    5.80
   2  -5 -13   -1.10    4.20
  -2   5  13   -3.00    3.90
   2  -5 -14   16.20    5.60
  -2   5  14   15.20    4.90
   2  -5 -15   -2.10    5.00
  -2   5  15    3.70    4.80
   2  -5 -16    0.90    5.70
  -2   5  16    4.80    5.00
   2  -5 -17    0.30    5.60
  -2   5  17    0.10    5.30
   2  -5 -18   -5.30    5.90
  -2   5  18    4.40    5.70
   1  -5  21   66.59    7.80
  -1   5 -21   73.69   11.00
   1  -5  20    3.40    3.90
  -1   5 -20    1.30    6.30
   1  -5  19   -0.40    3.50
  -1   5 -19   13.40    6.60
   1  -5  18    5.60    3.80
  -1   5 -18    5.90    5.60
   1  -5  17   63.69    6.60
  -1   5 -17   69.39    9.80
  -1   5 -17   67.89    6.90
  -1   5 -16   23.50    5.70
  -1   5 -16   28.40    7.10
  -1   5 -15   41.80    7.40
  -1   5 -15   36.70    7.10
  -1   5 -15   39.20    5.00
  -1   5 -14   56.29    8.00
  -1   5 -14   40.60    6.30
  -1   5 -14   61.99    5.90
  -1   5 -13   85.09    9.20
  -1   5 -13   80.09    6.60
  -1   5 -13   74.19    7.90
  -1   5 -13   88.49    7.60
  -1   5 -12  123.39    8.60
  -1   5 -12  151.48   10.20
  -1   5 -12  137.49   10.70
  -1   5 -12  127.79    8.00
  -1   5 -11 1156.28   49.10
  -1   5 -11 1142.19   49.60
  -1   5 -11 1092.79   47.50
  -1   5 -11 1096.39   46.90
   1  -5  10   10.90    3.80
  -1   5 -10   17.10    4.10
  -1   5 -10   16.30    2.80
  -1   5 -10   10.90    2.90
   1  -5   9    5.90    3.10
  -1   5  -9    8.70    2.10
  -1   5  -9    2.00    2.80
  -1   5  -9    4.00    2.20
   1  -5   8   14.60    3.30
  -1   5  -8   14.30    3.40
  -1   5  -8   18.30    2.50
  -1   5  -8   21.20    3.00
   1  -5   7  126.89    8.40
  -1   5  -7  136.19    7.40
  -1   5  -7  144.49    8.70
  -1   5  -7  140.79    7.10
   1  -5   6    3.40    2.40
  -1   5  -6    3.70    2.40
  -1   5  -6    4.70    1.40
  -1   5  -6    1.90    1.60
   1  -5   5  116.19    7.30
   1  -5   5  115.99    6.10
  -1   5  -5  108.69    6.10
  -1   5  -5  116.29    7.40
   1  -5   4    0.00    1.20
   1  -5   4    3.20    2.10
  -1   5  -4    1.30    1.30
  -1   5  -4    1.70    2.10
   1  -5   3   72.39    4.10
   1  -5   3   56.99    4.90
  -1   5  -3   59.29    4.90
  -1   5  -3   61.19    4.00
   1  -5   2  220.78   11.50
   1  -5   2  235.78   10.50
  -1   5  -2  234.98   10.50
  -1   5  -2  215.98   11.50
   1  -5   1 1990.40   94.39
   1  -5   1 2048.40  111.39
  -1   5  -1 2040.00   95.59
  -1   5  -1 1992.70  110.79
   1  -5   0    8.20    2.50
   1  -5   0    9.30    1.70
  -1   5   0    7.80    2.30
  -1   5   0    6.70    1.80
   1  -5  -1   28.20    3.50
   1  -5  -1   23.80    2.50
  -1   5   1   15.90    2.40
  -1   5   1   14.50    2.80
   1  -5  -2   33.80    3.30
   1  -5  -2   29.80    3.70
  -1   5   2   28.00    4.00
  -1   5   2   34.50    3.50
   1  -5  -3   68.29    5.60
   1  -5  -3   66.29    4.70
  -1   5   3   70.39    5.60
  -1   5   3   59.99    4.90
   1  -5  -4   20.20    3.50
   1  -5  -4   20.50    2.90
  -1   5   4   24.60    3.60
  -1   5   4   32.90    4.30
   1  -5  -5    3.80    2.10
   1  -5  -5    2.60    2.50
  -1   5   5    3.40    2.50
  -1   5   5    2.30    2.50
   1  -5  -6    5.60    2.40
   1  -5  -6    6.30    3.00
  -1   5   6   10.20    3.30
  -1   5   6    4.90    2.80
   1  -5  -7   26.30    4.00
   1  -5  -7   22.70    4.40
  -1   5   7   23.70    4.20
  -1   5   7   22.50    4.30
   1  -5  -8  170.38    9.80
   1  -5  -8  156.48   10.50
  -1   5   8  167.58   10.60
  -1   5   8  162.78   10.10
   1  -5  -9  170.18   11.30
   1  -5  -9  187.68   11.80
  -1   5   9  180.08   11.20
  -1   5   9  170.38   11.00
   1  -5 -10   69.59    6.50
   1  -5 -10   58.99    7.00
  -1   5  10   56.19    6.40
  -1   5  10   74.69    7.50
   1  -5 -11   44.30    6.60
   1  -5 -11   49.50    6.00
  -1   5  11   42.50    6.30
   1  -5 -12   14.80    4.90
  -1   5  12   10.10    5.00
   1  -5 -13   28.00    6.30
  -1   5  13   16.20    5.30
   1  -5 -14    0.80    4.90
  -1   5  14   14.10    5.50
   1  -5 -15   10.30    5.70
  -1   5  15   -0.20    5.10
   1  -5 -16   33.90    7.50
  -1   5  16   33.20    7.00
   1  -5 -17   10.30    6.30
  -1   5  17    5.20    5.80
   1  -5 -18    1.10    6.10
  -1   5  18    3.20    6.00
   0  -5  21   -2.20    3.60
   0  -5  20   77.19    7.60
   0   5 -20   75.39   11.50
   0  -5  19   -0.80    3.10
   0   5 -19    2.20    5.90
   0  -5  18   87.69    7.70
   0   5 -18   88.89   10.80
   0   5 -18  103.19    8.10
   0  -5  17   -3.30    2.70
   0   5 -17   -3.70    3.00
   0   5 -17   -3.90    5.00
   0  -5  16  739.93   32.30
   0   5 -16  749.73   32.60
   0   5 -16  706.03   36.00
   0  -5  15    0.60    2.70
   0   5 -15   -1.50    4.60
   0   5 -15    0.20    2.70
   0  -5  14   73.09    6.00
   0   5 -14   59.69    8.30
   0   5 -14   74.59    6.30
   0   5 -13   -0.20    4.10
   0   5 -13    0.50    3.50
   0   5 -13    4.70    2.60
   0   5 -12 1103.59   49.90
   0   5 -12 1115.79   46.70
   0   5 -12 1129.99   49.50
   0   5 -11    0.50    2.10
   0   5 -11   -1.20    2.00
   0   5 -11   -0.20    3.30
   0  -5   9   -1.80    2.60
   0   5  -9   -0.50    2.80
   0   5  -9   -0.10    1.60
   0   5  -9   -0.50    1.60
   0  -5   8   99.49    7.60
   0   5  -8   97.09    5.50
   0   5  -8   96.99    5.40
   0   5  -8  104.39    7.80
   0  -5   7    2.70    2.70
   0   5  -7    0.40    1.20
   0   5  -7    0.40    2.30
   0   5  -7    1.10    1.20
   0  -5   6 1399.46   60.19
   0   5  -6 1395.56   57.89
   0   5  -6 1417.56   57.89
   0   5  -6 1521.65   60.49
   0  -5   5    2.80    2.60
   0   5  -5    1.50    0.90
   0   5  -5   -0.50    0.90
   0   5  -5   -0.50    2.20
   0  -5   4  926.81   41.30
   0   5  -4  961.10   39.30
   0   5  -4 1021.20   41.70
   0  -5   3   -0.40    0.90
   0  -5   3   -1.90    1.90
   0   5  -3    1.60    2.20
   0   5  -3    0.40    1.00
   0  -5   2   45.80    2.80
   0  -5   2   34.70    4.00
   0   5  -2   37.60    2.80
   0   5  -2   45.30    4.50
   0  -5   1    1.60    2.00
   0  -5   1   -0.40    1.00
   0   5  -1   -3.00    1.90
   0   5  -1   -0.20    1.20
   0  -5   0 3527.85  179.38
   0  -5   0 3868.41  155.68
   0   5   0 3558.34  157.98
   0   5   0 3329.67  177.68
   0  -5  -1   -2.00    1.20
   0  -5  -1    1.30    2.30
   0   5   1   -1.70    1.50
   0   5   1    0.70    2.10
   0  -5  -2  488.65   20.90
   0  -5  -2  490.45   22.30
   0   5   2  489.05   22.20
   0   5   2  478.95   21.30
   0  -5  -3   -2.10    1.50
   0  -5  -3    0.80    2.30
   0   5   3   -3.20    1.90
   0   5   3   -1.30    1.90
   0  -5  -4  222.88   10.90
   0  -5  -4  209.08   12.00
   0   5   4  229.48   12.10
   0   5   4  227.48   11.60
   0  -5  -5   -1.20    1.90
   0  -5  -5   -0.60    2.70
   0   5   5    0.50    2.40
   0   5   5   -0.30    2.30
   0  -5  -6    2.70    2.30
   0  -5  -6    5.50    3.20
   0   5   6   15.70    3.40
   0   5   6    3.50    2.80
   0  -5  -7    0.30    3.00
   0  -5  -7    2.40    2.50
   0   5   7   -3.10    2.40
   0   5   7   -5.00    2.60
   0  -5  -8   56.79    5.60
   0  -5  -8   46.50    5.70
   0   5   8   46.60    6.00
   0   5   8   43.80    5.60
   0  -5  -9   -1.70    3.40
   0   5   9   -1.30    3.50
   0   5   9    3.00    3.50
   0  -5 -10  131.69    9.10
   0  -5 -10  125.19   10.00
   0   5  10  129.29   10.00
   0   5  10  131.59    9.80
   0  -5 -11   -1.60    3.40
   0   5  11    4.30    4.20
   0  -5 -12   10.60    5.00
   0   5  12   12.50    5.10
   0  -5 -13   -5.10    4.10
   0   5  13   -1.70    4.60
   0  -5 -14   22.00    6.10
   0   5  14   35.30    7.00
   0  -5 -15   -8.00    4.30
   0   5  15   -4.70    5.10
   0  -5 -16   10.00    6.30
   0   5  16   15.00    6.80
   0  -5 -17    2.70    6.10
   0   5  17   -1.10    5.80
   0  -5 -18    3.10    6.50
   0   5  18    9.80    6.60
  -1  -5  21   34.60    5.40
   1   5 -21   26.50    8.50
  -1  -5  20   16.80    4.20
   1   5 -20   10.40    8.30
  -1  -5  19   46.10    5.60
   1   5 -19   41.30    8.60
   1   5 -19   49.20    5.80
  -1  -5  18   23.30    4.20
   1   5 -18   22.70    7.00
   1   5 -18   20.90    4.10
  -1  -5  17   -1.40    2.70
   1   5 -17    4.10    5.80
   1   5 -17   -1.30    2.70
  -1  -5  16    0.40    2.50
   1   5 -16    2.10    5.10
   1   5 -16   -5.00    2.40
  -1  -5  15  150.28    8.60
   1   5 -15  148.49    8.90
   1   5 -15  149.79   12.90
   1   5 -14    3.40    5.10
   1   5 -14    2.30    2.40
  -1  -5  13  249.48   11.60
   1   5 -13  239.18   15.70
   1   5 -13  227.28   12.80
   1   5 -12   42.70    6.60
   1   5 -12   34.60    6.30
   1   5 -12   33.00    3.40
   1   5 -11  133.99    7.40
   1   5 -11  158.48   10.80
   1   5 -11  136.69    7.20
  -1  -5  10   72.69    7.70
   1   5 -10   83.89    8.10
   1   5 -10   58.69    4.20
   1   5 -10   69.29    4.20
  -1  -5   9  892.11   40.90
   1   5  -9  939.11   37.50
   1   5  -9  904.91   37.50
   1   5  -9  944.11   41.10
  -1  -5   8   49.70    6.10
   1   5  -8   44.40    2.40
   1   5  -8   45.90    2.30
   1   5  -8   64.79    6.80
  -1  -5   7   -1.10    2.70
   1   5  -7    2.30    2.80
  -1  -5   6    1.80    2.80
   1   5  -6    6.50    3.00
  -1  -5   5  263.67   14.00
   1   5  -5  266.37   14.20
  -1  -5   4   -0.90    2.50
   1   5  -4    2.10    2.80
  -1  -5   3  371.46   18.40
   1   5  -3  397.76   18.60
  -1  -5   2   15.10    1.30
  -1  -5   2    8.50    2.90
   1   5  -2   16.10    3.30
   1   5  -2   13.50    1.40
  -1  -5   1   53.29    3.00
  -1  -5   1   51.59    5.50
   1   5  -1   70.69    6.20
   1   5  -1   51.49    3.40
  -1  -5   0   23.60    4.00
  -1  -5   0   17.80    1.90
   1   5   0   21.40    2.50
   1   5   0   16.20    3.30
  -1  -5  -1 1405.16   56.99
  -1  -5  -1 1424.76   58.99
   1   5   1 1323.17   57.39
   1   5   1 1455.25   58.99
  -1  -5  -2   21.60    2.60
  -1  -5  -2   25.60    4.10
   1   5   2   25.00    3.80
   1   5   2   25.30    3.20
  -1  -5  -3   11.20    3.20
  -1  -5  -3    9.30    3.20
   1   5   3   13.50    3.20
   1   5   3   12.10    2.90
  -1  -5  -4    5.50    3.20
  -1  -5  -4   21.60    3.00
   1   5   4   16.80    3.30
   1   5   4   17.00    3.70
  -1  -5  -5    7.00    3.30
  -1  -5  -5    3.00    2.30
   1   5   5    2.50    2.90
   1   5   5    3.00    2.80
  -1  -5  -6   80.79    5.90
  -1  -5  -6   64.09    6.90
   1   5   6   68.69    6.80
   1   5   6   94.49    7.60
  -1  -5  -7    1.30    3.50
  -1  -5  -7    1.80    2.60
   1   5   7    7.50    3.50
   1   5   7    2.40    3.40
  -1  -5  -8   38.70    4.90
  -1  -5  -8   33.90    5.50
   1   5   8   27.80    5.10
   1   5   8   38.20    5.80
  -1  -5  -9   14.90    4.70
  -1  -5  -9   22.90    4.30
   1   5   9   17.60    4.50
   1   5   9   20.60    4.90
  -1  -5 -10   25.20    4.80
  -1  -5 -10   19.90    5.00
   1   5  10   19.50    5.10
  -1  -5 -11  106.19   10.10
   1   5  11  105.79   10.40
  -1  -5 -12    0.40    4.20
   1   5  12   -1.50    4.70
  -1  -5 -13    4.70    4.70
   1   5  13   -3.90    4.80
  -1  -5 -14   32.80    7.10
   1   5  14   23.50    6.30
  -1  -5 -15   11.10    6.00
   1   5  15    5.70    6.00
  -1  -5 -16    3.30    5.90
   1   5  16    7.00    6.20
  -1  -5 -17   -1.90    6.20
   1   5  17   -2.30    5.60
  -2  -5  20   79.29    6.90
   2   5 -20   82.59    7.30
   2   5 -20   77.79   11.20
  -2  -5  19  147.99    9.50
   2   5 -19  152.08   12.50
   2   5 -19  138.29   16.60
  -2  -5  18  235.28   12.40
   2   5 -18  255.97   18.10
   2   5 -18  219.98   12.50
  -2  -5  17   57.29    5.30
   2   5 -17   57.49    5.70
   2   5 -17   60.89    9.90
  -2  -5  16    6.70    2.70
   2   5 -16    3.20    2.60
   2   5 -16   15.30    6.40
  -2  -5  15   83.09    5.80
   2   5 -15   88.09    6.10
   2   5 -15   66.59    9.70
  -2  -5  14  491.35   20.30
   2   5 -14  431.36   25.30
   2   5 -14  457.25   20.50
  -2  -5  13  201.58    9.30
   2   5 -13  184.78    9.40
   2   5 -13  187.68   14.10
   2   5 -12   58.69    4.00
   2   5 -12   60.19   11.30
   2   5 -11    7.40    1.50
   2   5 -11    8.10    1.60
  -2  -5  10   19.90    5.00
   2   5 -10   20.00    5.10
  -2  -5   9  317.77   18.20
   2   5  -9  364.96   18.60
  -2  -5   8 1130.19   51.49
   2   5  -8 1235.68   51.79
  -2  -5   7  899.41   40.70
   2   5  -7  932.91   42.40
  -2  -5   6  534.85   26.00
   2   5  -6  567.94   26.20
  -2  -5   5   36.10    5.40
   2   5  -5   44.20    5.80
  -2  -5   4    1.00    2.90
   2   5  -4    1.80    2.90
  -2  -5   3   -0.70    2.70
   2   5  -3   -0.30    2.70
  -2  -5   2    3.30    2.80
   2   5  -2   -1.90    2.50
  -2  -5   1   -2.20    2.50
  -2  -5   1    1.80    1.20
  -2  -5   1    0.70    1.00
   2   5  -1    0.50    2.80
  -2  -5   0  213.28   12.10
  -2  -5   0  214.18    9.60
   2   5   0  211.68    9.80
   2   5   0  219.28   12.00
  -2  -5  -1    2.80    1.50
  -2  -5  -1    7.90    3.20
   2   5   1    7.40    3.10
   2   5   1    5.80    1.90
  -2  -5  -2  107.69    5.70
  -2  -5  -2   98.19    7.60
   2   5   2   90.09    7.30
   2   5   2   92.19    6.20
  -2  -5  -3   96.09    7.80
  -2  -5  -3   96.49    6.00
   2   5   3  102.29    7.00
   2   5   3  109.39    7.90
  -2  -5  -4   13.80    2.80
  -2  -5  -4    5.20    3.50
   2   5   4   15.40    3.30
   2   5   4   13.70    3.60
  -2  -5  -5   10.40    2.90
  -2  -5  -5   10.30    3.60
   2   5   5   13.20    3.50
  -2  -5  -6   10.20    3.10
  -2  -5  -6    9.30    3.80
   2   5   6   10.60    3.80
   2   5   6   11.70    3.70
  -2  -5  -7   28.50    5.20
  -2  -5  -7   35.90    4.70
   2   5   7   29.90    5.00
   2   5   7   27.50    4.90
  -2  -5  -8   67.99    7.90
   2   5   8   70.69    7.30
   2   5   8   76.39    7.90
  -2  -5  -9   -1.40    3.80
  -2  -5  -9   -2.00    3.00
   2   5   9    3.40    4.10
  -2  -5 -10    9.40    4.70
   2   5  10    9.40    4.50
  -2  -5 -11   -0.60    4.20
   2   5  11    2.80    4.60
  -2  -5 -12   14.10    5.70
   2   5  12   11.80    5.60
  -2  -5 -13   10.20    5.40
   2   5  13    1.50    5.50
  -2  -5 -14   -2.50    4.90
   2   5  14   -5.20    4.90
  -2  -5 -15    3.70    5.50
   2   5  15   16.60    6.70
  -2  -5 -16    0.60    5.80
   2   5  16    5.60    9.30
  -3  -5  19   10.90    3.50
   3   5 -19   13.70    7.70
  -3  -5  18   89.69    6.60
   3   5 -18   82.39    6.60
   3   5 -18   85.49   15.20
  -3  -5  17   34.60    3.80
   3   5 -17   26.20    3.80
   3   5 -17   27.30    8.10
  -3  -5  16   10.90    2.60
   3   5 -16    3.10    2.50
   3   5 -16    9.80    6.40
  -3  -5  15    1.40    1.90
   3   5 -15    0.30    2.00
   3   5 -15    0.30    5.50
  -3  -5  14   21.70    2.40
   3   5 -14   19.70    2.60
   3   5 -14   16.30    6.40
   3   5 -13   87.19   10.30
   3   5 -13   70.79    4.30
   3   5 -12    4.60    5.20
  -3  -5  10  313.97   20.00
  -3  -5   9   -3.20    3.80
  -3  -5   8  229.38   14.40
   3   5  -8  241.98   14.40
  -3  -5   7  168.18   12.20
   3   5  -7  211.58   12.60
  -3  -5   6  142.49   10.70
   3   5  -6  161.18   10.80
  -3  -5   5    3.20    3.40
   3   5  -5    8.50    4.00
  -3  -5   4   20.80    4.60
   3   5  -4   24.90    4.80
  -3  -5   3   97.89    8.30
  -3  -5   2   32.10    2.00
  -3  -5   2   36.90    2.00
  -3  -5   2   28.00    4.80
   3   5  -2   32.50    5.60
  -3  -5   1    3.70    3.20
  -3  -5   1   13.60    1.70
  -3  -5   1   15.40    1.90
   3   5  -1   13.60    3.80
  -3  -5   0  188.98    8.70
  -3  -5   0  192.28   11.40
  -3  -5   0  169.68    8.40
   3   5   0  168.28   11.50
  -3  -5  -1    1.00    1.70
  -3  -5  -1    0.60    2.00
  -3  -5  -1   -2.80    2.80
  -3  -5  -2   18.80    2.80
  -3  -5  -2   25.70    4.90
   3   5   2   21.20    5.00
  -3  -5  -3  137.39    9.70
  -3  -5  -3  132.69    7.70
   3   5   3  124.59    7.90
   3   5   3  144.79    9.50
  -3  -5  -4  144.49    8.50
  -3  -5  -4  153.28   10.40
   3   5   4  162.88   10.20
   3   5   4  133.29    8.90
  -3  -5  -5   10.90    4.20
  -3  -5  -5   11.60    3.20
   3   5   5   17.00    4.40
   3   5   5   11.50    3.50
  -3  -5  -6   31.60    4.40
  -3  -5  -6   24.30    5.20
   3   5   6   31.50    5.10
   3   5   6   24.70    4.70
  -3  -5  -7    3.40    3.80
   3   5   7   -2.00    3.50
  -3  -5  -8    6.20    5.80
  -3  -5  -8    1.70    3.10
   3   5   8    0.40    3.70
  -3  -5  -9    0.80    4.20
   3   5   9    7.40    4.50
  -3  -5 -10   17.00    5.60
   3   5  10   17.80    5.20
  -3  -5 -11   11.80    5.50
   3   5  11    9.40    5.30
  -3  -5 -12    2.60    5.20
   3   5  12   -1.30    4.90
  -3  -5 -13    4.70    5.60
   3   5  13    3.80    5.30
  -3  -5 -14   12.70    6.40
   3   5  14    9.80    6.20
  -4  -5  17  221.18   10.20
   4   5 -17  192.28   17.30
   4   5 -16   14.50    6.80
   4   5 -16   10.70    2.20
   4   5 -15  175.98    8.10
   4   5 -15  159.18   15.20
   4   5 -14   28.00    8.30
   4   5 -13    3.40    5.80
   4   5 -12   13.80    6.80
   4   5 -11   49.30    8.60
  -4  -5   9   -2.00    4.50
  -4  -5   8   85.39    9.10
  -4  -5   6   -1.70    3.90
  -4  -5   5   72.19    8.20
   4   5  -5   85.89    8.70
  -4  -5   4   -0.50    3.60
   4   5  -4    2.10    3.40
  -4  -5   3   85.99    8.70
   4   5  -3   98.29    8.50
  -4  -5   2   19.20    5.10
  -4  -5   2   27.50    2.20
  -4  -5   2   26.50    2.10
   4   5  -2   26.00    5.00
  -4  -5   1   28.40    2.70
  -4  -5   1   19.50    4.90
  -4  -5   1   28.70    2.60
   4   5  -1   23.30    4.80
  -4  -5   0   20.90    5.00
  -4  -5   0   26.90    3.00
  -4  -5   0   25.80    2.80
   4   5   0   22.90    4.60
  -4  -5  -1  226.38   10.90
  -4  -5  -1  229.18   11.30
  -4  -5  -1  211.18   13.60
   4   5   1  245.88   13.50
  -4  -5  -2   39.60    4.00
  -4  -5  -2   41.80    4.50
  -4  -5  -2   38.10    6.10
   4   5   2   43.20    5.80
  -4  -5  -3   -2.10    2.60
  -4  -5  -3    2.10    2.50
  -4  -5  -3    1.40    3.60
   4   5   3   -7.10    2.70
  -4  -5  -4   -1.20    3.10
  -4  -5  -4    1.30    2.50
  -4  -5  -4   -3.10    3.40
   4   5   4    1.00    3.10
  -4  -5  -5   11.80    4.50
  -4  -5  -5   17.00    4.30
  -4  -5  -5   25.00    4.10
  -4  -5  -6   12.00    3.80
  -4  -5  -6   20.00    5.50
  -4  -5  -7    3.30    3.30
  -4  -5  -7    3.90    4.00
   4   5   7    2.70    3.70
  -4  -5  -8   -2.60    4.00
   4   5   8    2.60    4.00
  -4  -5  -9    0.50    4.30
   4   5   9    5.30    4.30
  -4  -5 -10   -1.40    4.50
   4   5  10    6.50    4.80
  -4  -5 -11   11.50    5.30
   4   5  11   -2.50    4.60
  -4  -5 -12    6.90    5.30
   4   5  12    5.10    5.10
   5   5 -14    7.40    6.80
   5   5 -13    5.00    6.40
   5   5 -12    9.60    6.50
   5   5 -11   13.10    6.20
   5   5 -10   15.00    6.70
  -5  -5   8  101.39   10.80
  -5  -5   7   50.69    7.80
  -5  -5   6  114.39   10.80
  -5  -5   5    3.20    4.60
  -5  -5   4   58.99    8.10
  -5  -5   3   14.00    1.40
  -5  -5   3    9.60    4.70
  -5  -5   3   12.10    1.40
  -5  -5   2    0.70    4.60
  -5  -5   2    1.90    1.60
  -5  -5   2    4.20    1.60
  -5  -5   1    1.60    1.90
  -5  -5   1    2.60    1.90
  -5  -5   0   13.20    2.60
  -5  -5   0   18.80    3.00
  -5  -5  -1    3.50    2.30
  -5  -5  -1   -6.20    6.10
  -5  -5  -1   -3.20    2.40
  -5  -5  -2   39.50    6.50
  -5  -5  -2   32.10    4.10
  -5  -5  -2   43.70    4.80
  -5  -5  -3   44.00    5.10
  -5  -5  -3   37.70    4.50
  -5  -5  -3   39.00    6.30
  -5  -5  -4    0.20    2.70
  -5  -5  -4   -3.30    3.10
  -5  -5  -4    0.10    3.90
  -5  -5  -5    1.80    4.30
  -5  -5  -5    8.60    4.00
  -5  -5  -5   12.00    3.50
  -5  -5  -6   15.30    4.90
  -5  -5  -6    7.60    3.70
  -5  -5  -6   10.20    4.80
  -5  -5  -7   10.50    4.80
  -5  -5  -8    0.80    4.10
  -5  -5  -8    2.60    4.70
  -5  -5  -9   11.70    5.60
  -5  -5  -9   16.30    5.40
   6   5 -10   -0.30    6.10
   6   5  -9   21.60    7.50
  -6  -5   7   31.50    7.50
  -6  -5   6  104.69   11.10
  -6  -5   5   10.50    5.40
  -6  -5   4    1.50    4.60
  -6  -5   3   14.80    1.70
  -6  -5   3   18.00    5.90
  -6  -5   3   11.80    1.70
  -6  -5   2   -0.40    1.70
  -6  -5   2    4.10    4.60
  -6  -5   2   -2.80    1.70
  -6  -5   1    5.80    4.60
  -6  -5   1    1.80    2.20
  -6  -5   1    1.50    3.20
  -6  -5   0    0.20    2.40
  -6  -5   0    8.80    2.50
  -6  -5   0    1.60    4.60
  -6  -5  -1    2.30    4.50
  -6  -5  -1    5.80    3.00
  -6  -5  -1    9.30    2.80
  -6  -5  -2   22.50    3.70
  -6  -5  -2   22.30    5.70
  -6  -5  -2   20.30    4.10
  -6  -5  -3   44.20    7.20
  -6  -5  -3   57.99    6.00
  -6  -5  -4   29.50    4.60
  -6  -5  -4   32.80    5.30
  -6  -5  -4   27.70    5.90
  -9   6  -7   17.50    7.40
  -9   6  -6   22.90    7.30
  -9   6  -5   33.00    7.40
  -9   6  -4   -6.20    6.60
  -9   6  -3    3.20    9.10
  -9   6  -2    2.40    5.40
  -9   6  -1    0.20    4.60
  -9   6   0   10.50    5.80
  -9   6   1   18.50    6.00
  -9   6   2   11.40    5.40
  -9   6   3    8.90    6.20
   9  -6  -4   15.90    1.90
   9  -6  -4   22.40    2.20
   9  -6  -5   41.50    5.60
   9  -6  -5   35.10    3.60
  -9   6   5   33.30    7.00
   9  -6  -6    3.40    2.70
  -9   6   6    1.60    5.30
  -8   6 -12   33.20    8.40
  -8   6 -11   14.10    6.70
  -8   6  -9   68.09    9.60
  -8   6  -8   78.19    9.70
  -8   6  -7    0.90    5.50
  -8   6  -6  196.58   14.90
  -8   6  -5   51.69    8.00
  -8   6  -4  320.07   18.90
  -8   6  -3   32.10    6.80
  -8   6  -2   -1.80    4.60
  -8   6  -1   -2.20    4.40
  -8   6   0    6.60    4.60
  -8   6   1   82.09    8.60
   8  -6  -2    5.60    1.60
   8  -6  -2    5.90    1.70
  -8   6   2   10.80    4.90
   8  -6  -3   27.10    3.10
   8  -6  -3   44.30    4.00
  -8   6   3   33.70    6.40
   8  -6  -4    0.50    2.60
   8  -6  -4    2.10    2.20
  -8   6   4    4.70    4.50
   8  -6  -5    1.30    2.50
  -8   6   5    0.90    4.50
   8  -6  -6   89.29    6.90
  -8   6   6   82.59    7.90
  -8   6   6   82.89    9.00
   8  -6  -7   25.60    4.50
  -8   6   7   46.90    6.10
  -8   6   7   13.70    5.20
   8  -6  -8    1.80    3.40
  -8   6   8    3.60    4.80
  -8   6   8   -5.10    3.20
   8  -6  -9   28.10    5.10
  -8   6   9   28.80    5.80
  -8   6   9   12.30    5.80
   8  -6 -10   13.20    4.80
  -8   6  10   14.20    6.10
  -7   6 -15    9.30    2.10
  -7   6 -15    5.90    6.50
  -7   6 -14    1.80    6.30
  -7   6 -13   -3.20    5.80
  -7   6 -12   -6.30    5.20
  -7   6 -11    0.20    5.40
  -7   6 -10   -1.40    5.20
  -7   6  -9   -0.30    5.00
  -7   6  -8    0.50    4.70
  -7   6  -7  303.87   18.30
  -7   6  -6   24.40    6.00
  -7   6  -5    5.40    4.90
  -7   6  -4    9.60    4.40
  -7   6  -3  118.99    9.90
  -7   6  -2    1.10    4.10
  -7   6  -1    7.30    4.30
   7  -6   0    4.50    1.50
  -7   6   0    3.10    1.70
  -7   6   0    1.00    3.90
   7  -6  -1   -1.80    1.60
  -7   6   1   -2.60    2.00
  -7   6   1    2.60    3.90
   7  -6  -2   13.00    2.50
  -7   6   2   17.70    3.30
  -7   6   2    7.40    4.20
   7  -6  -3  211.68   10.80
  -7   6   3  200.28   11.50
  -7   6   3  233.88   13.40
   7  -6  -4    4.80    2.70
  -7   6   4    3.70    4.10
  -7   6   4    1.40    2.90
   7  -6  -5    3.50    2.80
  -7   6   5    5.80    4.30
  -7   6   5    4.50    3.30
   7  -6  -6   -2.90    2.60
  -7   6   6    5.60    3.40
  -7   6   6    4.30    4.20
   7  -6  -7   97.69    8.00
  -7   6   7  113.59    9.20
  -7   6   7  117.79    9.70
   7  -6  -8   18.10    4.40
  -7   6   8   19.20    4.80
  -7   6   8   20.20    5.50
   7  -6  -9   23.30    5.00
  -7   6   9   13.50    4.80
  -7   6   9   11.00    4.80
   7  -6 -10    3.80    5.90
  -7   6  10   -0.10    4.80
   7  -6 -11    1.10    4.10
  -7   6  11    8.70    5.20
   7  -6 -12   24.70    6.10
  -7   6  12   17.60    7.10
   7  -6 -13   10.20    5.50
  -7   6  13    1.10    5.40
  -6   6 -17   -3.20    3.40
  -6   6 -17   12.10    6.80
  -6   6 -16   98.79    8.60
  -6   6 -16  102.99    7.80
  -6   6 -16  110.99   12.40
  -6   6 -15  116.19   12.50
  -6   6 -15  113.19    8.30
  -6   6 -15   98.39    7.50
  -6   6 -14   60.19    5.50
  -6   6 -14   51.19    5.70
  -6   6 -14   59.69    9.20
  -6   6 -13  198.58   15.40
  -6   6 -13  211.48   11.70
  -6   6 -13  203.78   11.30
  -6   6 -12    9.20    5.60
  -6   6 -12    7.10    2.40
  -6   6 -12   10.50    2.90
  -6   6 -11   67.39    9.10
  -6   6 -11   70.99    5.00
  -6   6 -11   79.49    5.60
  -6   6 -10    0.00    1.60
  -6   6 -10   -1.20    4.70
  -6   6 -10   -0.50    1.90
  -6   6  -9   48.30    3.50
  -6   6  -9   55.19    7.60
  -6   6  -9   53.09    3.90
  -6   6  -8  112.39   10.30
  -6   6  -8  115.99    5.70
  -6   6  -8  118.99    5.90
  -6   6  -7  128.69   10.60
  -6   6  -7  119.89    5.80
  -6   6  -7  119.99    5.60
  -6   6  -6  226.08    9.70
  -6   6  -6  222.48    9.80
  -6   6  -6  275.77   19.70
  -6   6  -5   14.90    1.80
  -6   6  -5   18.70    4.80
  -6   6  -5   19.00    1.70
  -6   6  -4    8.00    1.50
  -6   6  -4    9.00    4.30
   6  -6   3  116.89    8.90
   6  -6   3  113.69    5.70
  -6   6  -3  112.59    9.10
  -6   6  -3  108.59    5.80
   6  -6   2  106.09    5.60
  -6   6  -2   97.49    5.80
  -6   6  -2  110.89    8.90
   6  -6   1  389.66   17.20
   6  -6   1  421.36   20.10
  -6   6  -1  415.36   17.70
  -6   6  -1  361.46   19.80
   6  -6   0   16.90    4.30
   6  -6   0   17.00    2.50
  -6   6   0   14.30    3.90
  -6   6   0    7.80    2.50
   6  -6  -1  124.99    7.00
  -6   6   1  125.09    7.60
  -6   6   1  114.19    9.10
   6  -6  -2   10.90    2.70
  -6   6   2   10.90    3.80
  -6   6   2   12.70    3.10
   6  -6  -3   98.99    6.60
  -6   6   3   99.69    8.40
  -6   6   3   87.99    7.10
   6  -6  -4  350.96   16.80
  -6   6   4  358.86   17.70
   6  -6  -5    8.00    3.10
  -6   6   5   11.00    3.90
  -6   6   5   13.20    4.00
   6  -6  -6    2.50    2.90
  -6   6   6    3.40    3.40
  -6   6   6    5.40    3.80
   6  -6  -7   19.80    4.30
  -6   6   7    9.50    4.10
  -6   6   7   21.60    4.90
   6  -6  -8   71.79    7.20
  -6   6   8   79.69    8.10
  -6   6   8   63.99    7.20
   6  -6  -9    3.40    3.80
  -6   6   9    4.00    4.10
  -6   6   9    3.50    4.10
   6  -6 -10   31.00    6.30
  -6   6  10   16.10    5.10
   6  -6 -11    8.30    4.80
  -6   6  11   -1.60    4.30
   6  -6 -12    8.00    4.90
  -6   6  12   -3.20    4.70
   6  -6 -13   24.90    6.50
  -6   6  13   29.60    6.70
   6  -6 -14   -2.00    5.00
   6  -6 -15    1.00    5.50
  -6   6  15   -1.00    4.90
  -5   6 -18    3.90    5.60
  -5   6 -18   -1.10    4.50
  -5   6 -17    5.40    4.70
  -5   6 -17    3.60    3.40
  -5   6 -17    5.20    5.90
  -5   6 -16   21.90    5.40
  -5   6 -16   20.50    7.10
  -5   6 -16   20.60    5.30
  -5   6 -15   94.39   10.60
  -5   6 -15   89.19    8.60
  -5   6 -15   79.69    7.80
  -5   6 -14  189.08   12.00
  -5   6 -14  178.48   14.00
  -5   6 -14  182.08   11.20
  -5   6 -13    4.40    3.00
  -5   6 -13   14.70    5.80
  -5   6 -13    8.10    3.80
  -5   6 -12    9.80    5.30
  -5   6 -12   16.50    3.50
  -5   6 -12    8.90    3.70
  -5   6 -11    0.00    2.40
  -5   6 -11    2.10    4.40
  -5   6 -11    1.20    2.90
  -5   6 -10   -2.40    4.00
  -5   6 -10   -1.00    2.60
  -5   6 -10    1.10    2.60
  -5   6  -9   28.30    4.10
  -5   6  -9   24.90    5.50
  -5   6  -9   25.10    4.50
  -5   6  -9   26.50    3.50
  -5   6  -8   19.10    4.20
  -5   6  -8   23.10    3.10
  -5   6  -8   19.60    3.60
  -5   6  -8   20.10    5.10
  -5   6  -7   18.80    5.00
  -5   6  -7   16.00    3.10
  -5   6  -7   22.80    3.00
   5  -6   6  133.59    9.40
   5  -6   6  144.89    7.90
  -5   6  -6  141.39   10.00
  -5   6  -6  137.89    7.40
   5  -6   5  258.37   12.10
   5  -6   5  262.97   14.10
  -5   6  -5  252.97   14.30
  -5   6  -5  245.48   11.80
   5  -6   4  645.54   26.80
  -5   6  -4  617.84   26.60
  -5   6  -4  612.14   28.80
   5  -6   3    7.20    2.10
   5  -6   3    4.20    3.30
  -5   6  -3    1.30    2.90
  -5   6  -3    4.40    1.90
   5  -6   2   21.20    2.80
   5  -6   2   19.90    4.50
  -5   6  -2   18.30    4.00
  -5   6  -2   19.60    2.80
   5  -6   1   35.30    5.60
   5  -6   1   28.00    3.20
  -5   6  -1   31.50    3.40
  -5   6  -1   19.00    4.20
   5  -6   0    2.40    2.00
  -5   6   0    2.40    3.00
  -5   6   0    7.80    2.40
   5  -6  -1   10.10    2.50
   5  -6  -1   11.10    4.10
  -5   6   1   14.00    3.50
  -5   6   1   14.80    2.90
   5  -6  -2   19.60    3.30
   5  -6  -2   20.20    3.90
  -5   6   2   23.70    3.70
  -5   6   2   24.40    4.40
   5  -6  -3   86.79    7.30
   5  -6  -3   93.19    6.50
  -5   6   3   80.99    6.70
  -5   6   3   92.39    7.50
   5  -6  -4  171.68   10.10
   5  -6  -4  177.38   11.10
  -5   6   4  175.68   10.60
  -5   6   4  203.48   11.30
   5  -6  -5   50.49    5.90
   5  -6  -5   35.20    4.60
  -5   6   5   53.59    6.00
  -5   6   5   45.80    5.50
   5  -6  -6  264.07   14.40
  -5   6   6  295.27   15.30
   5  -6  -7    7.50    3.50
  -5   6   7   16.20    4.30
  -5   6   7   10.20    6.10
   5  -6  -8   13.80    4.20
  -5   6   8   18.00    4.40
  -5   6   8    9.40    4.00
   5  -6  -9   67.19    7.30
  -5   6   9   82.39    7.90
  -5   6   9   68.19    7.10
   5  -6 -10   -2.00    3.90
  -5   6  10    3.70    4.20
   5  -6 -11   35.00    6.50
  -5   6  11   29.30    5.90
   5  -6 -12   16.00    5.30
  -5   6  12   19.40    5.70
   5  -6 -13    1.80    4.60
  -5   6  13   -4.00    4.40
   5  -6 -14   -2.70    5.10
  -5   6  14   -4.30    4.10
   5  -6 -15    1.60    5.30
  -5   6  15   -0.30    7.80
   5  -6 -16   -1.50    6.20
  -5   6  16   -2.80    4.90
  -4   6 -20   15.20    8.20
  -4   6 -20   18.50    6.70
  -4   6 -19   -2.20    5.10
  -4   6 -19   -5.40    4.60
  -4   6 -18   -0.60    4.90
  -4   6 -18    2.40    5.30
  -4   6 -17   12.00    5.70
  -4   6 -17   22.50    6.40
  -4   6 -16    1.30    4.50
  -4   6 -16    1.90    3.60
  -4   6 -16    4.20    5.20
  -4   6 -15   39.20    6.70
  -4   6 -15   32.00    6.60
  -4   6 -15   35.90    6.40
  -4   6 -14   59.99    7.80
  -4   6 -14   76.99    8.10
  -4   6 -14   66.09    7.20
  -4   6 -13  143.79   11.40
  -4   6 -13  139.69   10.70
  -4   6 -13  141.39    9.90
  -4   6 -12   10.90    3.70
  -4   6 -12    6.80    3.70
  -4   6 -12    5.20    3.90
  -4   6 -12    6.20    4.20
  -4   6 -11  247.18   14.80
  -4   6 -11  275.17   14.60
  -4   6 -11  288.77   16.00
  -4   6 -11  267.67   14.20
  -4   6 -10   26.00    4.70
  -4   6 -10   14.30    3.80
  -4   6 -10   26.20    5.30
  -4   6 -10   22.30    3.90
  -4   6  -9  380.96   19.40
  -4   6  -9  406.56   18.60
  -4   6  -9  358.26   18.60
  -4   6  -9  370.16   18.00
  -4   6  -8   10.90    3.30
  -4   6  -8   16.90    4.40
  -4   6  -8   13.30    3.00
   4  -6   7  294.37   14.10
  -4   6  -7  285.17   15.20
  -4   6  -7  273.27   13.80
   4  -6   6   81.39    6.20
   4  -6   6   92.89    7.10
  -4   6  -6   96.99    6.80
  -4   6  -6  103.89    7.80
   4  -6   5   61.29    5.90
   4  -6   5   57.79    4.90
  -4   6  -5   49.50    5.50
  -4   6  -5   59.79    4.80
   4  -6   4  219.98   11.90
   4  -6   4  220.68   11.10
  -4   6  -4  229.98   11.10
  -4   6  -4  218.88   12.20
   4  -6   3   74.89    6.40
   4  -6   3   81.69    5.70
  -4   6  -3   98.39    7.00
  -4   6  -3   98.89    5.90
   4  -6   2   45.30    5.00
   4  -6   2   27.70    3.30
  -4   6  -2   26.80    3.80
  -4   6  -2   30.80    4.10
   4  -6   1  228.88   11.60
   4  -6   1  200.68   10.50
  -4   6  -1  201.88   10.60
  -4   6  -1  212.28   11.50
   4  -6   0   63.99    5.20
   4  -6   0   77.29    6.10
  -4   6   0   59.99    5.70
  -4   6   0   73.19    5.40
   4  -6  -1    5.20    2.60
   4  -6  -1    2.50    2.20
  -4   6   1    7.80    2.90
  -4   6   1   12.90    2.90
   4  -6  -2   21.90    3.50
   4  -6  -2   36.20    4.50
  -4   6   2   25.40    3.80
  -4   6   2   29.80    4.30
   4  -6  -3   94.69    6.90
   4  -6  -3   84.49    6.50
  -4   6   3   79.69    6.50
  -4   6   3   90.39    6.90
   4  -6  -4  244.08   13.10
   4  -6  -4  255.57   13.00
  -4   6   4  245.88   13.10
  -4   6   4  241.88   13.10
   4  -6  -5  372.16   18.70
   4  -6  -5  338.67   16.90
  -4   6   5  338.37   17.00
  -4   6   5  327.97   17.00
   4  -6  -6    4.40    3.00
   4  -6  -6    2.30    2.80
  -4   6   6    3.50    3.30
  -4   6   6   -3.50    2.90
   4  -6  -7  508.25   24.10
   4  -6  -7  528.15   24.30
  -4   6   7  491.65   23.90
  -4   6   7  517.05   24.50
   4  -6  -8   -1.20    3.30
   4  -6  -8   -4.70    3.10
  -4   6   8   -0.50    3.20
  -4   6   8   -0.60    3.20
   4  -6  -9    7.50    4.10
  -4   6   9    5.10    3.70
   4  -6 -10   33.00    6.10
  -4   6  10   33.90    5.60
   4  -6 -11   -0.90    4.20
  -4   6  11   -3.60    3.70
   4  -6 -12   -1.20    4.50
  -4   6  12   -1.40    4.10
   4  -6 -13   10.80    5.30
  -4   6  13    1.20    4.40
   4  -6 -14    3.30    5.60
  -4   6  14   -0.70    4.70
   4  -6 -15   -1.60    5.10
  -4   6  15    0.90    4.50
   4  -6 -16    5.50    6.20
   4  -6 -17    4.80    6.30
  -4   6  17   -6.00    5.10
  -3   6 -20   18.60    6.50
  -3   6 -20   17.60    7.10
  -3   6 -19   -5.60    4.80
  -3   6 -19    4.90    5.10
  -3   6 -18   19.70    6.60
  -3   6 -18   22.60    5.90
  -3   6 -17    4.90    5.10
  -3   6 -17    4.10    5.30
  -3   6 -16   -5.70    4.20
  -3   6 -16   -3.40    4.20
  -3   6 -15   42.40    7.20
  -3   6 -15   41.50    6.50
  -3   6 -15   38.40    6.40
  -3   6 -14   58.49    7.70
  -3   6 -14   61.99    6.60
  -3   6 -14   50.29    6.80
  -3   6 -14   53.69    6.60
  -3   6 -13    6.50    3.10
  -3   6 -13    8.10    4.20
  -3   6 -13    8.00    4.40
  -3   6 -13    7.20    3.70
  -3   6 -12  519.25   24.80
  -3   6 -12  477.35   25.20
  -3   6 -12  508.75   23.70
  -3   6 -12  540.95   24.80
  -3   6 -11  192.08   11.50
  -3   6 -11  173.08   11.50
  -3   6 -11  191.48   12.10
  -3   6 -11  180.18   10.70
  -3   6 -10   62.09    6.90
  -3   6 -10   84.49    7.30
  -3   6 -10   67.79    6.90
  -3   6 -10   76.69    6.60
   3  -6   9    3.60    2.90
  -3   6  -9    8.60    3.50
  -3   6  -9    5.00    2.80
  -3   6  -9   10.40    2.90
   3  -6   8   73.29    6.40
  -3   6  -8   73.49    6.50
  -3   6  -8   63.69    5.40
  -3   6  -8   57.19    5.80
   3  -6   7   81.19    6.30
  -3   6  -7   77.19    6.20
  -3   6  -7   82.39    7.00
   3  -6   6    4.90    2.40
   3  -6   6    7.40    2.80
  -3   6  -6    9.40    2.90
  -3   6  -6    6.80    2.80
   3  -6   5   89.39    6.30
   3  -6   5   87.49    7.30
  -3   6  -5   94.09    6.30
  -3   6  -5   79.49    6.30
   3  -6   4   48.00    4.70
  -3   6  -4   37.80    4.30
  -3   6  -4   63.79    5.30
   3  -6   3   30.60    3.70
  -3   6  -3   28.80    3.80
  -3   6  -3   34.80    4.00
   3  -6   2 1192.28   49.30
   3  -6   2 1114.69   50.09
  -3   6  -2 1212.28   49.40
  -3   6  -2 1178.08   49.30
   3  -6   1  304.57   14.60
   3  -6   1  301.67   14.60
  -3   6  -1  298.17   14.60
  -3   6  -1  310.27   14.70
   3  -6   0   96.99    6.80
   3  -6   0  105.79    6.80
  -3   6   0  105.69    6.90
  -3   6   0  109.39    6.90
   3  -6  -1   81.09    5.80
   3  -6  -1   75.59    5.90
  -3   6   1   82.69    6.00
  -3   6   1   74.79    5.90
   3  -6  -2   10.30    3.00
   3  -6  -2    6.20    2.40
  -3   6   2    4.40    2.50
  -3   6   2    8.90    2.80
   3  -6  -3   70.09    5.60
   3  -6  -3   56.69    5.60
  -3   6   3   67.79    5.90
  -3   6   3   72.59    5.80
   3  -6  -4    2.70    2.50
   3  -6  -4    4.10    2.60
  -3   6   4   -0.30    2.60
  -3   6   4    3.00    2.50
   3  -6  -5   -0.90    2.20
   3  -6  -5   -2.50    2.50
  -3   6   5   -0.80    2.50
  -3   6   5    2.70    3.00
   3  -6  -6    2.20    2.80
   3  -6  -6    1.20    2.80
  -3   6   6   -0.50    2.80
  -3   6   6    2.00    3.10
   3  -6  -7   46.70    5.40
   3  -6  -7   35.30    5.40
  -3   6   7   26.10    4.60
  -3   6   7   45.20    6.40
   3  -6  -8  167.28   11.10
   3  -6  -8  174.88   10.60
  -3   6   8  159.78   11.00
  -3   6   8  168.28   10.70
   3  -6  -9  229.68   13.70
   3  -6  -9  221.48   12.90
  -3   6   9  214.78   13.60
  -3   6   9  221.88   13.00
   3  -6 -10    1.10    4.20
  -3   6  10   -1.50    5.60
   3  -6 -11   -1.30    4.30
  -3   6  11    1.30    3.90
   3  -6 -12    5.10    4.70
  -3   6  12   -1.00    3.90
   3  -6 -13    3.40    5.40
  -3   6  13   -0.10    3.90
   3  -6 -14    5.30    5.60
  -3   6  14    2.20    4.40
   3  -6 -15    8.00    6.00
  -3   6  15    1.60    4.80
   3  -6 -16   -1.20    5.60
  -3   6  16   -2.90    5.00
   3  -6 -17    3.30    6.20
  -3   6  17    0.20    5.10
  -2   6 -21   14.30    5.90
  -2   6 -21   16.90    7.60
  -2   6 -20   41.60    9.10
  -2   6 -20   42.30    7.60
  -2   6 -19   33.50    6.70
  -2   6 -19   22.20    7.30
  -2   6 -18   47.90    7.50
  -2   6 -18   65.09    9.60
  -2   6 -17    6.30    4.50
  -2   6 -17    0.50    5.20
  -2   6 -16    2.60    3.00
  -2   6 -16   -0.50    3.90
  -2   6 -16    2.50    5.20
  -2   6 -15   23.30    4.30
  -2   6 -15   10.10    4.40
  -2   6 -15   14.00    5.60
  -2   6 -14  117.89    9.40
  -2   6 -14  124.19    9.90
  -2   6 -14  119.19   11.10
  -2   6 -14  103.09    8.00
  -2   6 -13    8.80    3.90
  -2   6 -13   10.30    3.80
  -2   6 -13   10.50    4.90
  -2   6 -13    9.70    3.20
  -2   6 -12   21.30    4.30
  -2   6 -12   23.30    5.60
  -2   6 -12   34.10    4.20
  -2   6 -12   38.60    5.70
  -2   6 -11    5.90    3.50
  -2   6 -11    6.70    3.10
  -2   6 -11    5.30    2.40
   2  -6  10   11.40    3.80
  -2   6 -10    4.60    3.10
  -2   6 -10    5.10    2.40
  -2   6 -10    1.70    2.70
   2  -6   9   -1.60    2.60
  -2   6  -9    1.90    2.90
  -2   6  -9   -0.80    2.30
  -2   6  -9    0.40    1.90
   2  -6   8  171.38   10.50
  -2   6  -8  171.88   10.50
  -2   6  -8  174.08    9.20
  -2   6  -8  177.28    9.70
   2  -6   7   99.89    7.30
  -2   6  -7  102.79    7.50
  -2   6  -7  100.59    6.10
  -2   6  -7   98.89    7.30
   2  -6   6   57.99    4.70
   2  -6   6   48.90    5.10
  -2   6  -6   57.89    5.80
  -2   6  -6   51.29    4.60
   2  -6   5  305.17   15.30
   2  -6   5  320.37   15.20
  -2   6  -5  315.17   15.50
  -2   6  -5  306.57   14.60
   2  -6   4 1477.35   63.09
  -2   6  -4 1477.05   62.39
  -2   6  -4 1598.04   63.39
   2  -6   3  633.04   28.50
  -2   6  -3  661.73   28.80
  -2   6  -3  658.43   28.00
   2  -6   2  615.64   27.40
   2  -6   2  633.64   26.80
  -2   6  -2  600.44   26.80
  -2   6  -2  643.54   27.60
   2  -6   1  766.22   33.60
   2  -6   1  774.22   32.90
  -2   6  -1  780.02   33.70
  -2   6  -1  780.32   32.90
   2  -6   0  388.86   18.20
   2  -6   0  378.46   17.40
  -2   6   0  398.56   18.20
  -2   6   0  380.96   18.10
   2  -6  -1   16.40    3.30
   2  -6  -1   12.50    2.50
  -2   6   1   16.80    3.50
  -2   6   1   14.00    2.80
   2  -6  -2  767.22   32.70
   2  -6  -2  758.82   33.50
  -2   6   2  781.92   32.90
  -2   6   2  753.82   33.50
   2  -6  -3  333.17   17.20
   2  -6  -3  358.36   16.50
  -2   6   3  390.56   17.60
  -2   6   3  340.87   16.60
   2  -6  -4  133.19    8.20
   2  -6  -4  147.59    9.10
  -2   6   4  138.89    8.50
  -2   6   4  148.19    9.20
   2  -6  -5   -0.90    2.20
   2  -6  -5   -3.70    2.60
  -2   6   5   -1.30    2.40
  -2   6   5    1.90    2.70
   2  -6  -6   44.50    4.80
   2  -6  -6   32.40    4.80
  -2   6   6   43.20    5.00
  -2   6   6   41.10    5.50
   2  -6  -7   -0.80    2.50
   2  -6  -7    2.30    3.30
  -2   6   7   -0.90    3.00
  -2   6   7    0.60    2.90
   2  -6  -8  110.39    8.20
   2  -6  -8  106.09    9.00
  -2   6   8  118.09    9.00
  -2   6   8  113.29    8.60
   2  -6  -9  171.08   11.80
   2  -6  -9  184.38   11.20
  -2   6   9  175.18   11.50
  -2   6   9  192.18   12.10
  -2   6  10  163.98   11.10
   2  -6 -11    8.00    4.50
  -2   6  11   -0.70    3.80
   2  -6 -12   19.60    5.80
  -2   6  12   17.30    5.00
   2  -6 -13    5.00    5.20
  -2   6  13    2.50    4.50
   2  -6 -14    5.30    5.50
  -2   6  14   -0.20    4.40
   2  -6 -15    6.50    5.70
  -2   6  15    6.30    5.60
   2  -6 -16   -2.10    5.80
  -2   6  16   -2.60    5.80
   2  -6 -17   -5.90    5.90
  -2   6  17   14.30    6.40
  -1   6 -21   36.30    6.80
  -1   6 -20   27.40    6.00
  -1   6 -20   12.90    7.00
  -1   6 -19   43.10    8.80
  -1   6 -19   34.80    6.40
  -1   6 -18   11.90    6.20
  -1   6 -18   27.70    5.90
  -1   6 -18   28.40    4.70
  -1   6 -17    2.50    5.20
  -1   6 -17    1.40    3.10
  -1   6 -17    0.40    3.90
  -1   6 -16   -3.20    2.80
  -1   6 -16    0.90    4.80
  -1   6 -16   -1.00    3.40
  -1   6 -15  158.48    9.50
  -1   6 -15  134.99   10.10
  -1   6 -15  149.49   12.80
  -1   6 -14    0.50    4.60
  -1   6 -14    6.70    2.90
  -1   6 -14    2.00    3.10
  -1   6 -13  222.08   11.90
  -1   6 -13  238.48   15.20
  -1   6 -13  248.98   14.60
  -1   6 -13  218.08   12.50
  -1   6 -12   29.20    4.30
  -1   6 -12   37.00    6.00
  -1   6 -12   45.00    4.50
  -1   6 -12   43.10    7.10
   1  -6  11  135.59   10.00
  -1   6 -11  123.29    8.00
  -1   6 -11  128.49    7.60
   1  -6  10   66.59    7.40
  -1   6 -10   70.29    5.90
  -1   6 -10   77.69    7.70
  -1   6 -10   74.29    6.50
   1  -6   9  883.21   39.00
  -1   6  -9  838.72   37.00
  -1   6  -9  873.21   36.70
  -1   6  -9  923.71   39.20
   1  -6   8   35.70    5.00
  -1   6  -8   45.80    4.10
  -1   6  -8   48.30    5.70
  -1   6  -8   47.10    3.90
   1  -6   7   -1.10    2.40
  -1   6  -7    2.40    1.50
  -1   6  -7    2.80    1.70
  -1   6  -7   -4.00    2.30
   1  -6   6    6.90    3.10
  -1   6  -6    8.90    2.00
  -1   6  -6    7.10    1.70
  -1   6  -6    9.80    3.20
   1  -6   5  239.28   13.10
   1  -6   5  252.67   11.60
  -1   6  -5  253.47   11.60
  -1   6  -5  263.67   13.50
   1  -6   4    1.50    2.30
   1  -6   4   -0.30    1.30
  -1   6  -4    0.10    2.20
  -1   6  -4    0.90    1.50
   1  -6   3  360.96   17.80
   1  -6   3  375.56   16.40
  -1   6  -3  387.26   18.10
  -1   6  -3  371.46   16.40
   1  -6   2   19.40    3.50
   1  -6   2    9.90    2.00
  -1   6  -2    8.60    2.90
  -1   6  -2   14.00    2.20
   1  -6   1   39.90    4.70
   1  -6   1   49.20    3.70
  -1   6  -1   51.59    4.00
  -1   6  -1   49.99    5.00
   1  -6   0   13.50    2.30
   1  -6   0   23.90    3.90
  -1   6   0   15.60    2.60
  -1   6   0   21.00    3.70
   1  -6  -1 1448.06   61.59
   1  -6  -1 1488.35   60.19
  -1   6   1 1433.76   60.39
  -1   6   1 1495.65   61.59
   1  -6  -2   24.40    3.00
   1  -6  -2   28.60    4.40
  -1   6   2   19.90    3.60
  -1   6   2   26.20    3.80
   1  -6  -3   11.00    2.40
   1  -6  -3    6.60    3.00
  -1   6   3    9.70    3.20
  -1   6   3   11.30    2.80
   1  -6  -4   14.70    2.70
   1  -6  -4   14.90    3.60
  -1   6   4   16.40    3.80
  -1   6   4   13.50    3.30
   1  -6  -5    0.70    2.90
   1  -6  -5    4.60    2.30
  -1   6   5    5.20    3.10
  -1   6   5   -2.40    2.50
   1  -6  -6   92.59    8.10
   1  -6  -6   66.29    5.90
  -1   6   6   65.19    8.00
  -1   6   6   73.39    6.50
   1  -6  -7    5.60    3.50
   1  -6  -7    8.70    3.20
  -1   6   7    5.30    3.50
  -1   6   7    0.30    3.10
   1  -6  -8   23.60    5.00
   1  -6  -8   31.60    5.40
  -1   6   8   27.00    4.70
  -1   6   8   35.60    5.70
   1  -6  -9   13.10    3.90
   1  -6  -9   17.60    4.80
  -1   6   9   30.20    5.30
   1  -6 -10   20.80    5.40
   1  -6 -10   30.60    6.50
  -1   6  10   16.70    4.60
   1  -6 -11   95.49    9.40
  -1   6  11   84.89    8.30
   1  -6 -12    3.00    4.50
  -1   6  12   -5.00    4.10
   1  -6 -13    4.10    5.50
  -1   6  13    4.80    5.20
   1  -6 -14   24.60    6.80
  -1   6  14   43.90    7.60
   1  -6 -15   11.20    6.50
  -1   6  15    8.60    5.90
   1  -6 -16   -9.30    4.80
  -1   6  16    0.20    5.60
   1  -6 -17    6.20    6.60
  -1   6  17    5.80    6.20
   0   6 -21    0.50    4.10
   0   6 -21   -2.80    6.20
   0   6 -20   -3.50    6.60
   0   6 -20   -0.90    4.70
   0   6 -19   -0.70    2.90
   0   6 -19   -1.20    6.20
   0   6 -19   -2.90    3.70
   0   6 -18    8.50    4.10
   0   6 -18    7.30    6.30
   0   6 -18   12.10    4.50
   0   6 -17    3.50    3.00
   0   6 -17   -4.10    4.90
   0   6 -17    1.60    3.50
   0   6 -16    2.60    3.30
   0   6 -16    6.20    3.10
   0   6 -16    4.40    5.40
   0   6 -15    4.10    2.60
   0   6 -15   -0.10    2.90
   0   6 -15   -5.40    4.80
   0   6 -14    7.00    2.60
   0   6 -14    1.20    2.60
   0   6 -14   -2.50    4.40
   0   6 -13   -2.40    4.60
   0   6 -13    1.30    2.30
   0   6 -12 1078.39   47.30
   0   6 -12 1173.78   47.20
   0   6 -12 1150.58   50.49
   0  -6  11   -2.00    3.50
   0   6 -11    2.20    3.80
   0   6 -11    1.70    1.90
   0   6 -11   -1.40    1.80
   0  -6  10  859.81   38.60
   0   6 -10  891.81   38.80
   0   6 -10  817.52   35.50
   0   6 -10  851.51   35.40
   0  -6   9    0.20    3.40
   0   6  -9    0.50    1.50
   0   6  -9    1.00    1.50
   0  -6   8  176.88   10.70
   0   6  -8  151.68    7.40
   0   6  -8  158.98   10.40
   0   6  -8  149.19    7.30
   0  -6   7    0.00    2.90
   0   6  -7   -0.10    1.20
   0   6  -7    1.00    1.10
   0   6  -7    1.80    2.80
   0  -6   6  864.31   40.50
   0   6  -6 1007.50   41.10
   0   6  -6  919.61   37.70
   0   6  -6  927.21   37.70
   0  -6   5    0.30    2.60
   0   6  -5   -0.50    0.90
   0   6  -5    0.10    1.00
   0   6  -5   -0.60    2.80
   0  -6   4 1443.06   60.89
   0  -6   4 1455.25   58.19
   0   6  -4 1472.25   60.99
   0   6  -4 1398.56   58.19
   0  -6   3    0.60    1.10
   0  -6   3   -2.00    2.40
   0   6  -3   -2.10    1.20
   0   6  -3   -1.70    2.40
   0  -6   2  801.72   35.70
   0  -6   2  858.91   33.60
   0   6  -2  771.12   35.70
   0   6  -2  814.32   33.70
   0  -6   1    1.60    1.30
   0  -6   1   -0.90    2.50
   0   6  -1   -0.80    1.50
   0   6  -1   -2.50    2.40
   0  -6   0 1150.48   46.10
   0  -6   0 1095.29   48.10
   0   6   0 1147.69   48.20
   0   6   0 1098.39   46.40
   0  -6  -1   -0.70    1.50
   0  -6  -1   -1.30    2.60
   0   6   1   -1.00    1.90
   0   6   1    0.40    2.50
   0  -6  -2 1844.72   74.69
   0  -6  -2 1878.41   76.59
   0   6   2 1770.92   75.09
   0  -6  -3   -0.30    2.60
   0  -6  -3    2.60    1.90
   0   6   3    0.60    2.70
   0   6   3   -1.10    2.20
   0  -6  -4   22.70    4.60
   0  -6  -4   20.40    3.00
   0   6   4   22.30    3.90
   0   6   4   14.20    3.80
   0  -6  -5   -2.80    3.10
   0  -6  -5   -2.40    2.00
   0   6   5   -0.90    2.90
   0   6   5    1.60    2.70
   0  -6  -6  339.77   16.30
   0  -6  -6  354.36   18.10
   0   6   6  326.27   17.10
   0   6   6  340.47   17.60
   0  -6  -7    1.50    2.70
   0  -6  -7   -2.90    3.50
   0   6   7    3.40    3.60
   0   6   7   -3.40    3.20
   0  -6  -8   15.60    4.90
   0  -6  -8   13.00    4.20
   0   6   8    5.80    4.10
   0  -6  -9   -1.60    3.80
   0  -6  -9   -5.10    2.70
   0   6   9    0.90    4.00
   0  -6 -10    9.50    4.60
   0   6  10    4.20    4.50
   0  -6 -11    2.10    4.40
   0   6  11    3.30    4.60
   0  -6 -12   63.29    8.30
   0   6  12   71.39    8.70
   0  -6 -13   -2.90    4.80
   0   6  13    3.40    5.40
   0  -6 -14    9.10    5.90
   0   6  14   13.70    5.90
   0  -6 -15    4.60    5.80
   0   6  15   -2.50    5.60
   0  -6 -16   -4.50    5.10
   0   6  16    0.00    7.90
   1   6 -20   34.80    9.40
   1   6 -20   38.80    5.10
   1   6 -19   41.10   10.30
   1   6 -19   63.79    6.20
   1   6 -18   26.10    7.90
   1   6 -18   42.70    4.90
   1   6 -18   39.20    5.40
   1   6 -17   46.10    8.90
   1   6 -17   60.79    6.10
   1   6 -17   53.09    5.30
   1   6 -16    2.30    2.50
   1   6 -16   -4.10    5.30
   1   6 -16   -1.90    2.70
   1   6 -15   -3.20    2.00
   1   6 -15    1.40    5.70
   1   6 -14   11.70    5.70
   1   6 -14    6.30    2.40
   1   6 -14   10.40    2.70
   1   6 -13  117.99    7.00
   1   6 -13  133.29    7.10
   1   6 -13  153.08   12.40
   1   6 -12    5.30    1.90
   1   6 -12    6.90    1.90
  -1  -6  11  289.27   16.60
   1   6 -11  267.67   12.20
   1   6 -11  293.87   12.20
  -1  -6  10   77.29    8.40
   1   6 -10   59.29    7.20
  -1  -6   9   92.69    8.90
   1   6  -9  102.89    8.50
  -1  -6   8   37.50    5.70
   1   6  -8   36.80    5.50
  -1  -6   7  401.66   20.90
   1   6  -7  435.16   21.20
  -1  -6   6   24.70    4.70
  -1  -6   5    8.50    3.60
   1   6  -5   15.90    4.00
  -1  -6   4    6.50    3.20
   1   6  -4    8.20    3.50
  -1  -6   3  139.59    9.40
   1   6  -3  135.99    9.20
  -1  -6   2   21.40    4.20
  -1  -6   2   24.00    1.90
   1   6  -2   21.30    4.30
   1   6  -2   24.50    2.00
  -1  -6   1  277.27   15.30
  -1  -6   1  313.17   12.60
   1   6  -1  280.07   15.40
   1   6  -1  287.37   12.90
  -1  -6   0   18.40    2.10
  -1  -6   0   22.40    4.20
   1   6   0   19.40    4.30
   1   6   0   15.60    2.60
  -1  -6  -1   42.00    3.30
  -1  -6  -1   48.00    5.90
   1   6   1   32.40    3.80
   1   6   1   42.60    5.70
  -1  -6  -2    2.50    3.10
  -1  -6  -2    1.50    3.00
   1   6   2    4.40    2.40
  -1  -6  -3  145.59   10.00
  -1  -6  -3  139.59    7.70
   1   6   3  143.09    8.60
   1   6   3  156.48    9.90
  -1  -6  -4  113.59    6.90
  -1  -6  -4  112.99    8.70
   1   6   4  115.59    8.70
   1   6   4  116.79    7.90
  -1  -6  -5   -5.00    2.00
  -1  -6  -5    4.60    3.60
   1   6   5    2.10    3.10
   1   6   5    2.00    3.10
  -1  -6  -6   16.90    4.50
  -1  -6  -6   13.90    3.30
   1   6   6   17.70    4.20
   1   6   6   15.20    4.20
  -1  -6  -7   62.19    7.40
  -1  -6  -7   55.99    5.50
   1   6   7   49.10    6.30
  -1  -6  -8    4.70    3.10
  -1  -6  -8    0.70    4.10
   1   6   8   10.10    4.40
  -1  -6  -9   51.99    7.40
  -1  -6  -9   45.40    5.70
   1   6   9   41.10    6.50
  -1  -6 -10    5.40    4.90
   1   6  10   13.90    9.60
  -1  -6 -11    2.00    4.80
   1   6  11    8.80    5.20
  -1  -6 -12   29.00    7.10
   1   6  12   36.30    7.30
  -1  -6 -13   19.60    7.00
   1   6  13   15.30    6.60
  -1  -6 -14    3.70    5.50
   1   6  14   -6.10    5.10
  -1  -6 -15   -0.30    6.50
   1   6  15   -3.00    5.40
   2   6 -19   75.69   11.30
   2   6 -18   56.59    5.10
   2   6 -18   50.69    5.40
   2   6 -17   37.80    4.60
   2   6 -17   35.50    8.40
   2   6 -17   37.40    4.00
   2   6 -16    0.80    2.30
   2   6 -16   -0.50    1.90
   2   6 -16    0.30    5.40
   2   6 -15   22.70    3.00
   2   6 -15   27.70    2.90
   2   6 -15   20.20    6.90
   2   6 -14   78.19    4.50
   2   6 -14   78.49    4.50
   2   6 -14   95.39   10.80
   2   6 -13  115.59   12.00
  -2  -6  11    3.20    4.30
  -2  -6  10  312.37   18.00
  -2  -6   9  512.65   27.40
  -2  -6   8  918.71   44.30
   2   6  -8 1102.19   49.60
  -2  -6   7  674.73   32.40
   2   6  -7  707.73   32.60
  -2  -6   6  506.85   26.00
   2   6  -6  579.94   26.60
  -2  -6   5   85.59    8.20
   2   6  -5   85.69    8.30
  -2  -6   4   32.20    5.50
   2   6  -4   47.10    6.40
  -2  -6   3   97.49    8.30
   2   6  -3   96.49    8.30
  -2  -6   2  712.03   33.30
   2   6  -2  751.32   33.40
  -2  -6   1  277.27   11.90
  -2  -6   1  273.77   15.20
  -2  -6   1  270.27   11.70
   2   6  -1  282.87   15.30
  -2  -6   0   -0.10    1.30
  -2  -6   0   -1.90    2.90
   2   6   0    0.70    1.50
   2   6   0   -2.30    3.00
  -2  -6  -1   63.99    7.20
  -2  -6  -1   72.19    4.50
   2   6   1   70.79    7.20
   2   6   1   72.19    4.90
  -2  -6  -2   79.49    7.80
   2   6   2   77.19    5.90
   2   6   2   93.19    7.90
  -2  -6  -3   39.90    4.00
  -2  -6  -3   45.00    6.30
   2   6   3   48.10    4.90
   2   6   3   53.49    6.50
  -2  -6  -4  238.78   14.40
  -2  -6  -4  249.18   12.10
   2   6   4  234.88   12.90
   2   6   4  252.77   14.30
  -2  -6  -5  108.69    9.50
  -2  -6  -5  125.89    7.60
   2   6   5  110.49    8.50
  -2  -6  -6   27.90    4.00
   2   6   6   26.80    4.90
  -2  -6  -7    3.70    4.00
   2   6   7   -2.30    3.50
  -2  -6  -8   31.90    4.60
  -2  -6  -8   24.80    5.60
   2   6   8   14.00    4.90
  -2  -6  -9    4.10    4.80
   2   6   9   12.00    5.00
  -2  -6 -10    8.70    4.90
   2   6  10    7.20    4.80
  -2  -6 -11    1.20    5.10
   2   6  11    6.60    5.30
  -2  -6 -12   -0.90    4.80
   2   6  12   -0.70    5.10
  -2  -6 -13   13.40    6.40
   2   6  13    5.50    5.80
  -2  -6 -14    2.90    5.50
   2   6  14    4.50    5.80
   3   6 -17    1.10    1.60
   3   6 -17    2.80    1.60
   3   6 -17    8.50    7.20
   3   6 -16  118.39   13.50
   3   6 -15   15.20    7.00
   3   6 -14   -3.10    5.70
   3   6 -13    9.50    6.20
  -3  -6  11   20.70    6.20
  -3  -6  10    4.60    4.90
  -3  -6   9   52.89    7.40
  -3  -6   8  272.97   16.60
  -3  -6   7   -1.70    4.00
  -3  -6   5   20.30    5.10
  -3  -6   4    9.40    4.40
  -3  -6   3   16.60    4.80
   3   6  -3   13.90    6.10
  -3  -6   2    1.10    3.60
   3   6  -2    5.10    3.80
  -3  -6   1    9.30    4.20
  -3  -6   1   13.30    1.50
  -3  -6   1   15.20    1.70
   3   6  -1   12.50    4.30
  -3  -6   0   16.60    2.30
  -3  -6   0   13.00    4.30
  -3  -6   0   16.80    2.10
   3   6   0   11.40    4.80
  -3  -6  -1   76.49    5.30
  -3  -6  -1   72.49    4.70
  -3  -6  -1   73.69    8.10
  -3  -6  -2  107.39    6.50
  -3  -6  -2  107.89    9.50
  -3  -6  -2  127.69    7.50
  -3  -6  -3   46.90    4.20
   3   6   3   38.20    4.30
  -3  -6  -4   -1.40    2.30
  -3  -6  -4    1.20    3.90
   3   6   4    0.80    2.80
  -3  -6  -5   33.60    4.30
  -3  -6  -5   35.00    6.20
   3   6   5   32.20    4.80
  -3  -6  -6   13.60    5.10
  -3  -6  -6   11.70    3.40
   3   6   6   17.90    4.50
  -3  -6  -7    4.50    4.30
  -3  -6  -7    1.90    2.90
   3   6   7    0.20    3.60
  -3  -6  -8    9.80    5.00
  -3  -6  -8   11.60    4.20
   3   6   8    7.40    4.50
  -3  -6  -9    7.60    4.90
   3   6   9    5.20    4.50
  -3  -6 -10    5.00    5.00
   3   6  10    1.80    4.50
  -3  -6 -11    8.10    5.30
   3   6  11   -6.30    4.50
  -3  -6 -12   -8.00    4.90
   3   6  12    0.20    5.00
   4   6 -15  371.56   23.80
   4   6 -14    7.40    6.80
   4   6 -13   -1.90    5.50
   4   6 -12    4.80    6.00
  -4  -6  10   58.39    9.10
  -4  -6   9  155.98   13.00
  -4  -6   8    6.70    5.10
  -4  -6   7  131.59   11.60
  -4  -6   6    0.00    4.40
  -4  -6   5  505.05   25.90
  -4  -6   4   55.59    8.00
  -4  -6   3  160.28   12.10
  -4  -6   2    2.10    4.40
  -4  -6   1   19.70    1.80
  -4  -6   1    9.00    4.80
  -4  -6   1   12.50    1.50
  -4  -6   0   28.50    2.70
  -4  -6   0   29.20    3.00
  -4  -6   0   21.70    5.30
  -4  -6  -1   94.69    9.20
  -4  -6  -1   89.89    6.00
  -4  -6  -2    0.30    2.50
  -4  -6  -2    6.20    4.50
  -4  -6  -2   -2.00    2.00
  -4  -6  -3   12.10    3.50
  -4  -6  -3    9.70    2.80
  -4  -6  -3    5.10    4.40
  -4  -6  -4    2.50    3.40
  -4  -6  -4    6.80    2.90
  -4  -6  -4    1.00    4.30
  -4  -6  -5    5.80    4.80
  -4  -6  -5    5.20    3.10
  -4  -6  -5   -0.50    3.50
  -4  -6  -6    7.40    4.60
  -4  -6  -6   16.90    3.80
  -4  -6  -6   14.80    4.70
  -4  -6  -7    4.10    3.80
  -4  -6  -7    2.10    4.70
  -4  -6  -8    2.90    4.80
   4   6   8    4.40    4.20
  -4  -6  -9   -0.30    4.80
   4   6   9   11.00    4.80
  -4  -6 -10    5.50    5.40
   4   6  10    7.00    4.70
   5   6 -11   -1.00    6.10
  -5  -6   9    6.10    5.80
  -5  -6   8   -2.40    5.10
  -5  -6   7    7.40    5.20
  -5  -6   6   99.09   10.60
  -5  -6   5   24.30    6.60
  -5  -6   4   88.69    9.90
  -5  -6   3    5.80    4.80
  -5  -6   2    5.00    5.00
  -5  -6   1    4.30    4.90
  -5  -6   1    7.20    1.40
  -5  -6   1    6.50    1.40
  -5  -6   0    4.60    4.60
  -5  -6   0    2.50    1.70
  -5  -6   0    1.50    1.90
  -5  -6  -1   12.50    5.50
  -5  -6  -1   11.80    2.50
  -5  -6  -1   19.50    3.10
  -5  -6  -2    9.90    2.60
  -5  -6  -2   10.80    3.20
  -5  -6  -2    4.70    4.70
  -5  -6  -3    3.80    2.70
  -5  -6  -3    7.90    4.90
  -5  -6  -3   10.30    3.50
  -5  -6  -4   17.70    4.10
  -5  -6  -4   18.20    5.70
  -5  -6  -4    9.40    3.20
  -5  -6  -5   -3.00    3.50
  -5  -6  -5    0.80    3.00
  -5  -6  -5    5.70    5.00
  -5  -6  -6    4.50    4.70
  -5  -6  -6    7.40    4.30
  -9   7  -6   11.50    6.40
  -9   7  -5   45.60    8.80
  -9   7  -4    6.00    5.90
  -9   7  -3   36.80    8.00
  -9   7  -2   14.40    6.30
  -9   7  -1   23.00    6.30
  -9   7   0    1.60    5.20
  -9   7   1    8.90    5.80
  -9   7   2    6.50    5.30
  -9   7   3   61.99    8.80
   9  -7  -4    4.60    2.10
   9  -7  -4   -0.30    3.10
  -9   7   4    1.30    5.20
   9  -7  -5   24.70    3.60
  -9   7   5   28.30    6.50
  -8   7 -11   28.00    8.10
  -8   7 -10    0.50    6.00
  -8   7  -9    4.20    6.80
  -8   7  -8   10.50    6.90
  -8   7  -7   37.00    7.90
  -8   7  -6  420.56   23.60
  -8   7  -5    1.40    5.00
  -8   7  -4  104.59   10.60
  -8   7  -3   -2.60    5.20
  -8   7  -2   15.50    5.50
  -8   7  -1   87.59    9.40
  -8   7   0   60.99    8.10
   8  -7  -1   35.80    3.10
  -8   7   1   34.70    6.40
   8  -7  -2   70.99    4.90
  -8   7   2   58.99    5.30
  -8   7   2   60.19    8.00
   8  -7  -3    8.90    2.70
  -8   7   3    1.10    2.60
  -8   7   3    7.40    5.10
   8  -7  -4  104.59    7.20
  -8   7   4  111.39    8.20
  -8   7   4  102.19   10.10
   8  -7  -5   30.00    4.30
  -8   7   5   34.80    5.20
  -8   7   5   26.10    6.30
   8  -7  -6   36.20    4.90
  -8   7   6   29.80    5.30
  -8   7   6   38.60    6.90
   8  -7  -7   30.20    5.00
  -8   7   7   39.50    7.00
  -8   7   7   40.00    6.00
   8  -7  -8  102.69    8.70
  -8   7   8   87.79   10.00
  -8   7   8  104.69    9.70
   8  -7  -9   10.90    4.30
  -8   7   9    4.20    5.50
  -7   7 -14   22.60    2.80
  -7   7 -14   24.10    7.90
  -7   7 -13   31.80    2.70
  -7   7 -13   33.90    2.80
  -7   7 -13   28.20    8.00
  -7   7 -12   32.30    7.60
  -7   7 -11   -2.60    5.40
  -7   7 -10    2.50    5.70
  -7   7  -9    1.80    5.30
  -7   7  -8   42.00    7.50
  -7   7  -7   12.60    5.90
  -7   7  -6   13.00    5.60
  -7   7  -5  273.97   16.70
  -7   7  -4   34.20    6.50
  -7   7  -3   90.29    4.50
  -7   7  -3  112.59   10.40
   7  -7   2   76.99    4.40
  -7   7  -2   73.19    4.70
  -7   7  -2   61.79    8.10
   7  -7   1   80.09    4.90
  -7   7  -1   72.79    5.30
  -7   7  -1   74.09    8.00
   7  -7   0    0.10    1.80
  -7   7   0    0.90    2.20
  -7   7   0    1.10    4.00
   7  -7  -1    4.80    2.40
  -7   7   1    5.00    4.30
   7  -7  -2   41.90    4.90
  -7   7   2   34.70    6.00
  -7   7   2   46.90    5.20
   7  -7  -3   31.20    4.10
  -7   7   3   34.70    4.90
  -7   7   3   38.10    6.30
   7  -7  -4    1.10    2.70
  -7   7   4    4.50    3.30
  -7   7   4    6.10    4.20
   7  -7  -5  115.09    8.30
  -7   7   5  111.69    9.00
  -7   7   5  127.49   10.40
   7  -7  -6    4.60    3.40
  -7   7   6    7.20    4.30
  -7   7   6   -2.40    3.30
   7  -7  -7    0.20    3.40
  -7   7   7    5.90    4.00
  -7   7   7    4.00    4.50
   7  -7  -8   24.10    4.90
  -7   7   8   28.40    6.40
  -7   7   8   32.50    6.00
   7  -7  -9   17.20    4.90
  -7   7   9   18.80    5.80
   7  -7 -10   -0.70    4.00
  -7   7  10    8.30    5.50
   7  -7 -11    0.90    4.60
  -7   7  11    2.40    5.30
   7  -7 -12    1.90    4.80
  -7   7  12   -3.20    5.00
  -6   7 -16    9.10    8.40
  -6   7 -16    3.70    3.10
  -6   7 -16    1.90    3.70
  -6   7 -15   82.99   10.90
  -6   7 -15  103.49    8.60
  -6   7 -15  105.49    7.90
  -6   7 -14  123.19    8.30
  -6   7 -14  114.79    8.90
  -6   7 -14  137.09   13.50
  -6   7 -13  282.17   14.90
  -6   7 -13  297.87   18.70
  -6   7 -13  278.17   14.30
  -6   7 -12   53.29    6.20
  -6   7 -12   50.29    8.40
  -6   7 -12   56.89    5.20
  -6   7 -11    1.20    2.70
  -6   7 -11    0.60    5.00
  -6   7 -10    7.70    5.20
  -6   7 -10   17.40    3.00
  -6   7 -10    8.60    3.10
  -6   7  -9  224.18   11.90
  -6   7  -9  248.88   15.60
  -6   7  -9  233.38   11.30
  -6   7  -8    0.90    1.80
  -6   7  -8    2.50    4.40
  -6   7  -8   -0.40    2.30
  -6   7  -7  244.08   13.00
  -6   7  -7  311.47   16.80
  -6   7  -7  276.67   12.60
  -6   7  -6   51.99    7.10
  -6   7  -6   45.30    4.00
   6  -7   5   90.29    5.80
  -6   7  -5   92.09    8.80
  -6   7  -5   77.49    5.40
   6  -7   4  350.56   15.40
  -6   7  -4  319.07   15.20
   6  -7   3  892.71   36.70
  -6   7  -3  851.41   36.70
   6  -7   2  149.88    8.10
  -6   7  -2  135.09    8.20
  -6   7  -2  194.68   17.20
   6  -7   1  443.26   19.80
   6  -7   0   55.49    5.00
  -6   7   0   63.89    5.60
   6  -7  -1    3.00    2.50
  -6   7   1    2.70    2.80
  -6   7   1    3.20    3.70
   6  -7  -2   47.10    4.80
  -6   7   2   41.70    5.90
  -6   7   2   49.99    5.50
   6  -7  -3  179.58   10.20
  -6   7   3  171.68   11.60
  -6   7   3  179.38   10.80
   6  -7  -4   44.20    5.20
  -6   7   4   43.00    6.00
  -6   7   4   57.59    6.10
   6  -7  -5   32.00    4.90
  -6   7   5   32.20    5.40
  -6   7   5   37.20    5.60
   6  -7  -6   41.30    5.30
  -6   7   6   43.40    6.40
   6  -7  -7   25.60    4.90
  -6   7   7   17.60    5.00
  -6   7   7   22.30    4.90
   6  -7  -8   -0.70    3.50
  -6   7   8   -5.70    3.90
  -6   7   8   -0.50    3.90
   6  -7  -9   44.30    7.30
  -6   7   9   47.80    7.00
   6  -7 -10    0.00    3.90
  -6   7  10    4.70    4.80
   6  -7 -11   11.50    5.30
  -6   7  11    7.10    4.80
   6  -7 -12   -2.70    4.60
  -6   7  12    4.10    5.30
   6  -7 -13   -3.00    5.00
  -6   7  13    6.70    5.50
   6  -7 -14    0.30    5.40
  -6   7  14   -2.30    5.30
  -5   7 -18    8.50    6.10
  -5   7 -18   10.70    5.20
  -5   7 -17   11.50    6.30
  -5   7 -17    8.60    3.90
  -5   7 -17   17.70    5.20
  -5   7 -16    9.60    6.10
  -5   7 -16    8.40    4.80
  -5   7 -16    4.70    3.30
  -5   7 -15   17.30    6.30
  -5   7 -15    5.30    4.40
  -5   7 -15   18.90    5.00
  -5   7 -14    8.30    3.60
  -5   7 -14   11.20    5.70
  -5   7 -14    9.40    4.40
  -5   7 -13   77.89    8.20
  -5   7 -13   92.59    7.80
  -5   7 -13  103.69   10.80
  -5   7 -12  268.57   16.70
  -5   7 -12  265.27   14.40
  -5   7 -12  271.57   15.30
  -5   7 -11    7.90    3.90
  -5   7 -11    9.70    3.40
  -5   7 -11   20.30    5.90
  -5   7 -10   88.79    6.90
  -5   7 -10   87.69    7.80
  -5   7  -9   -0.70    2.80
  -5   7  -9    3.90    4.20
  -5   7  -9    1.20    2.50
  -5   7  -8    2.30    3.40
  -5   7  -8    3.50    3.90
  -5   7  -8   -1.30    2.10
   5  -7   7   12.50    3.10
   5  -7   7   23.30    4.70
  -5   7  -7   20.80    3.40
  -5   7  -7   18.40    4.50
   5  -7   6   13.10    3.10
   5  -7   6   11.30    3.80
  -5   7  -6    9.50    2.70
  -5   7  -6   14.60    4.50
   5  -7   5    7.80    3.50
   5  -7   5    3.20    2.50
  -5   7  -5   -0.60    3.30
  -5   7  -5    3.50    2.30
   5  -7   4   -2.20    2.60
   5  -7   4    0.20    2.30
  -5   7  -4    0.30    3.40
  -5   7  -4    1.70    2.20
   5  -7   3   42.90    4.50
   5  -7   3   52.29    6.00
  -5   7  -3   51.79    4.80
  -5   7  -3   45.50    5.70
   5  -7   2  459.25   21.90
  -5   7  -2  447.16   21.90
  -5   7  -2  449.66   20.60
   5  -7   1   12.60    2.90
   5  -7   1   14.80    3.90
  -5   7  -1   12.60    4.00
  -5   7  -1   20.10    3.40
   5  -7   0  189.68   11.20
   5  -7   0  175.68    9.90
  -5   7   0  180.08   10.10
  -5   7   0  178.48   11.10
   5  -7  -1    5.50    2.70
   5  -7  -1    5.20    3.20
  -5   7   1   11.00    3.80
  -5   7   1    6.00    2.80
   5  -7  -2   31.10    4.30
   5  -7  -2   19.70    4.20
  -5   7   2   29.60    4.30
  -5   7   2   29.40    5.10
   5  -7  -3    7.10    3.10
   5  -7  -3    9.60    3.90
  -5   7   3    4.80    3.00
  -5   7   3    6.90    3.50
   5  -7  -4    4.50    3.00
  -5   7   4    2.50    3.10
  -5   7   4    0.90    3.40
   5  -7  -5   16.30    3.90
  -5   7   5   20.20    4.50
   5  -7  -6    3.90    3.30
  -5   7   6   -4.50    3.30
  -5   7   6   -5.70    2.90
   5  -7  -7   39.30    5.80
  -5   7   7   38.60    5.90
  -5   7   7   49.80    6.50
   5  -7  -8   52.49    6.50
  -5   7   8   53.29    7.70
  -5   7   8   43.90    6.40
   5  -7  -9    5.70    4.90
  -5   7   9    5.00    4.40
   5  -7 -10    3.40    4.20
  -5   7  10   -2.30    4.00
   5  -7 -11   13.70    5.20
  -5   7  11    3.30    4.70
   5  -7 -12   -3.20    4.30
  -5   7  12   -1.90    4.80
   5  -7 -13   -1.40    5.10
  -5   7  13   -2.20    4.80
   5  -7 -14    2.00    6.00
  -5   7  14    2.20    5.20
  -5   7  15   14.90    6.00
  -4   7 -19   -1.00    4.90
  -4   7 -19   -1.00    5.20
  -4   7 -18    4.70    5.30
  -4   7 -18    2.30    5.00
  -4   7 -17  210.78   15.00
  -4   7 -17  200.38   14.90
  -4   7 -16   53.69    7.70
  -4   7 -16   54.19    8.30
  -4   7 -15   45.40    7.70
  -4   7 -15   34.40    6.70
  -4   7 -15   62.49    7.00
  -4   7 -14   -2.20    4.30
  -4   7 -14    4.50    3.60
  -4   7 -14   -1.90    4.10
  -4   7 -13  187.78   13.20
  -4   7 -13  205.38   13.70
  -4   7 -13  211.08   12.70
  -4   7 -12    1.20    3.30
  -4   7 -12   -0.70    3.10
  -4   7 -12    0.50    4.20
  -4   7 -12   -2.60    3.50
  -4   7 -11 1497.85   63.89
  -4   7 -11 1505.45   64.79
  -4   7 -11 1485.25   64.59
  -4   7 -11 1540.55   63.79
  -4   7 -10  104.29    7.80
  -4   7 -10   80.89    8.20
  -4   7 -10   88.49    7.50
   4  -7   9 1016.40   42.70
  -4   7  -9  930.91   43.10
  -4   7  -9  987.30   42.50
   4  -7   8   -0.10    2.70
  -4   7  -8    3.40    3.50
  -4   7  -8    4.90    2.80
  -4   7  -8    1.60    2.80
   4  -7   7  226.58   11.90
   4  -7   7  195.48   11.20
  -4   7  -7  199.98   12.10
  -4   7  -7  191.88   11.10
   4  -7   6   54.29    5.80
   4  -7   6   51.99    5.40
  -4   7  -6   58.29    5.40
  -4   7  -6   42.50    5.40
   4  -7   5  501.55   23.10
   4  -7   5  497.85   22.60
  -4   7  -5  519.05   22.80
  -4   7  -5  468.65   23.20
   4  -7   4   42.60    4.60
   4  -7   4   41.20    5.00
  -4   7  -4   48.30    4.90
  -4   7  -4   42.80    5.30
   4  -7   3  139.59    9.00
   4  -7   3  138.29    8.40
  -4   7  -3  144.29    8.60
  -4   7  -3  153.28    9.50
   4  -7   2   26.30    3.70
   4  -7   2   23.40    4.10
  -4   7  -2   34.10    4.80
  -4   7  -2   35.20    4.20
   4  -7   1  432.46   20.50
   4  -7   1  460.45   21.00
  -4   7  -1  437.26   20.60
  -4   7  -1  453.85   21.10
   4  -7   0   82.59    7.00
   4  -7   0   85.29    6.70
  -4   7   0  104.89    7.20
  -4   7   0   99.99    7.40
   4  -7  -1  781.32   34.90
   4  -7  -1  800.62   35.30
  -4   7   1  809.82   35.40
  -4   7   1  826.52   35.30
   4  -7  -2   28.50    4.40
   4  -7  -2   34.00    4.50
  -4   7   2   44.50    5.50
  -4   7   2   43.00    5.00
   4  -7  -3   86.39    7.10
   4  -7  -3   79.79    7.00
  -4   7   3   89.89    7.40
  -4   7   3   97.39    7.40
   4  -7  -4   -2.90    2.90
   4  -7  -4    0.80    2.60
  -4   7   4    1.40    3.10
  -4   7   4   -2.20    2.70
   4  -7  -5   53.99    5.90
   4  -7  -5   45.30    5.80
  -4   7   5   57.09    6.40
  -4   7   5   59.49    6.50
   4  -7  -6    2.40    3.40
   4  -7  -6    4.00    3.10
  -4   7   6    1.80    3.10
  -4   7   6    2.20    3.50
   4  -7  -7   33.70    5.30
  -4   7   7   33.90    6.30
  -4   7   7   43.60    5.90
   4  -7  -8   11.50    4.10
  -4   7   8   13.50    4.40
   4  -7  -9   38.60    6.10
  -4   7   9   28.80    5.50
   4  -7 -10   -0.40    3.80
  -4   7  10   -3.80    3.80
   4  -7 -11    1.10    4.40
  -4   7  11    6.00    4.70
   4  -7 -12   -1.90    4.20
  -4   7  12    1.50    4.40
   4  -7 -13   -3.40    5.30
  -4   7  13   -1.00    4.60
   4  -7 -14   -2.40    5.50
  -4   7  14    6.60    5.60
   4  -7 -15   -0.40    7.50
  -4   7  15   -1.50    5.40
  -3   7 -20   32.00    7.90
  -3   7 -20   22.60    6.50
  -3   7 -19   25.90    6.50
  -3   7 -19   30.80    7.70
  -3   7 -18   14.70    5.50
  -3   7 -18    6.80    5.80
  -3   7 -17   12.50    5.00
  -3   7 -17   12.90    6.40
  -3   7 -16   25.80    5.90
  -3   7 -16   26.40    6.60
  -3   7 -15    6.20    4.60
  -3   7 -15    6.10    5.10
  -3   7 -15   16.10    4.60
  -3   7 -14   -3.00    4.00
  -3   7 -14    2.00    4.00
  -3   7 -14   -0.90    2.80
  -3   7 -14   -1.70    3.30
  -3   7 -13   28.20    4.50
  -3   7 -13   26.10    5.20
  -3   7 -13   23.70    5.30
  -3   7 -13   27.00    6.30
  -3   7 -12  175.28   10.40
  -3   7 -12  152.68   11.10
  -3   7 -12  177.18   12.40
  -3   7 -11   -4.30    3.20
  -3   7 -11    2.30    2.80
  -3   7 -11    0.10    3.10
   3  -7  10  309.87   16.80
  -3   7 -10  346.87   17.10
  -3   7 -10  304.97   16.40
  -3   7 -10  315.07   15.70
   3  -7   9  200.38   11.30
  -3   7  -9  159.18    9.90
  -3   7  -9  191.08   11.30
  -3   7  -9  172.98   10.80
   3  -7   8  185.08   11.10
  -3   7  -8  177.58   11.00
  -3   7  -8  188.38   10.20
  -3   7  -8  182.58   10.80
   3  -7   7    5.10    3.00
  -3   7  -7    2.80    2.70
  -3   7  -7    3.20    3.00
   3  -7   6   10.10    3.20
   3  -7   6   12.60    3.00
  -3   7  -6   10.80    3.20
  -3   7  -6    9.90    3.00
   3  -7   5   35.40    4.30
   3  -7   5   37.90    4.90
  -3   7  -5   40.50    5.00
  -3   7  -5   39.00    4.60
   3  -7   4   15.60    3.10
   3  -7   4   13.10    3.30
  -3   7  -4   14.00    3.40
  -3   7  -4   16.30    3.40
   3  -7   3   42.80    4.40
   3  -7   3   46.70    4.90
  -3   7  -3   31.50    4.40
  -3   7  -3   44.00    4.80
   3  -7   2   84.79    6.20
   3  -7   2   75.89    6.40
  -3   7  -2   88.79    6.40
  -3   7  -2   86.09    6.70
   3  -7   1   18.70    3.50
   3  -7   1   20.80    3.90
  -3   7  -1   23.20    3.70
  -3   7  -1   19.10    3.60
   3  -7   0  200.58   11.20
   3  -7   0  202.08   10.80
  -3   7   0  192.48   10.80
  -3   7   0  203.28   11.30
   3  -7  -1   76.89    6.60
   3  -7  -1   88.89    6.30
  -3   7   1   91.39    6.90
  -3   7   1   74.69    6.30
   3  -7  -2  280.47   13.90
   3  -7  -2  267.97   14.30
  -3   7   2  261.47   14.40
  -3   7   2  287.27   14.10
   3  -7  -3   19.60    3.80
   3  -7  -3   31.30    4.40
  -3   7   3   23.90    4.10
  -3   7   3   21.10    4.30
   3  -7  -4   29.00    4.90
   3  -7  -4   34.10    4.70
  -3   7   4   32.70    4.60
  -3   7   4   38.10    5.10
   3  -7  -5   13.80    4.30
   3  -7  -5   15.40    4.10
  -3   7   5   16.10    3.90
  -3   7   5   20.70    4.50
   3  -7  -6   23.70    4.70
   3  -7  -6   23.70    4.30
  -3   7   6   17.00    4.10
  -3   7   6   35.50    5.40
   3  -7  -7   74.29    7.90
   3  -7  -7   75.69    7.20
  -3   7   7   71.79    7.40
  -3   7   7   80.39    7.90
   3  -7  -8   16.50    5.00
  -3   7   8   23.10    5.10
   3  -7  -9   15.70    5.10
  -3   7   9   22.10    5.20
   3  -7 -10    9.90    5.20
  -3   7  10    7.10    4.20
   3  -7 -11   22.50    6.00
  -3   7  11   17.20    5.00
   3  -7 -12   23.50    6.50
  -3   7  12   28.40    6.00
   3  -7 -13   22.60    6.40
  -3   7  13   14.50    5.30
   3  -7 -14    6.40    5.60
  -3   7  14    4.30    5.00
   3  -7 -15    3.30    6.60
  -3   7  15    7.30    7.20
   3  -7 -16   13.40    7.20
  -3   7  16    8.00    5.70
  -2   7 -20   63.59    8.40
  -2   7 -20   75.29   10.70
  -2   7 -19  154.18   12.40
  -2   7 -19  158.98   15.50
  -2   7 -18  260.57   17.90
  -2   7 -18  225.48   15.10
  -2   7 -17   58.59    9.20
  -2   7 -17   39.20    6.60
  -2   7 -17   55.09    6.70
  -2   7 -16    6.20    5.60
  -2   7 -16    5.90    4.00
  -2   7 -16    3.80    3.20
  -2   7 -15   66.79    7.40
  -2   7 -15   89.39    8.80
  -2   7 -15   74.89    9.70
  -2   7 -14  449.76   20.90
  -2   7 -14  431.86   28.00
  -2   7 -14  439.36   21.80
  -2   7 -13  183.68   11.60
  -2   7 -13  188.48   12.80
  -2   7 -13  184.78   10.70
  -2   7 -13  192.78   13.70
  -2   7 -12   71.69    6.10
  -2   7 -12   65.09    7.60
  -2   7 -12   69.89    6.80
   2  -7  11   11.80    4.40
  -2   7 -11    3.60    3.60
  -2   7 -11    9.70    3.40
  -2   7 -11    8.10    2.80
   2  -7  10   21.70    5.00
  -2   7 -10   33.30    6.10
  -2   7 -10   26.70    3.70
  -2   7 -10   32.40    4.30
   2  -7   9  334.17   17.80
  -2   7  -9  339.67   18.00
  -2   7  -9  334.57   16.50
  -2   7  -9  354.56   16.00
   2  -7   8 1175.78   51.79
  -2   7  -8 1231.38   52.09
  -2   7  -8 1202.58   50.59
  -2   7  -8 1205.68   50.09
   2  -7   7  885.41   39.20
  -2   7  -7  884.31   37.90
  -2   7  -7  909.51   39.50
  -2   7  -7  886.41   37.50
   2  -7   6  579.24   26.70
   2  -7   6  574.24   25.30
  -2   7  -6  593.14   26.90
   2  -7   5   26.70    3.40
   2  -7   5   32.10    4.60
  -2   7  -5   30.00    5.60
  -2   7  -5   35.60    5.00
   2  -7   4    2.50    1.90
   2  -7   4   -2.60    2.50
  -2   7  -4    3.30    2.90
   2  -7   3    0.20    2.50
   2  -7   3   -1.60    1.80
  -2   7  -3    1.30    2.30
  -2   7  -3    1.70    2.70
   2  -7   2    2.40    2.70
   2  -7   2    3.90    2.00
  -2   7  -2    3.50    2.20
  -2   7  -2   -2.70    2.50
   2  -7   1    1.20    2.60
   2  -7   1    0.80    1.90
  -2   7  -1    2.80    2.20
  -2   7  -1    1.50    2.60
   2  -7   0  229.18   11.30
   2  -7   0  230.98   12.50
  -2   7   0  217.58   12.30
  -2   7   0  223.48   11.50
   2  -7  -1    5.00    2.20
   2  -7  -1    1.90    3.00
  -2   7   1    4.80    2.50
  -2   7   1    5.00    3.00
   2  -7  -2   98.89    6.70
   2  -7  -2  106.39    7.90
  -2   7   2   98.39    7.80
  -2   7   2  104.49    7.10
   2  -7  -3  101.49    6.90
   2  -7  -3   95.89    8.00
  -2   7   3  112.79    7.40
  -2   7   3  103.99    8.00
   2  -7  -4   12.80    3.30
   2  -7  -4    7.70    3.40
  -2   7   4   12.60    3.90
  -2   7   4   12.50    3.60
   2  -7  -5    6.60    3.20
   2  -7  -5    8.70    3.90
  -2   7   5   11.00    3.60
  -2   7   5   12.40    4.00
   2  -7  -6    7.20    3.90
  -2   7   6    5.10    4.00
  -2   7   6    8.50    3.50
   2  -7  -7   22.90    5.30
   2  -7  -7   21.00    4.00
  -2   7   7   24.70    4.80
   2  -7  -8   46.60    7.90
   2  -7  -8   78.69    7.20
  -2   7   8   61.49    6.70
   2  -7  -9   -2.30    4.00
   2  -7 -10    7.60    4.60
  -2   7  10    8.30    4.40
   2  -7 -11    4.10    4.90
  -2   7  11    4.90    4.50
   2  -7 -12   15.90    6.00
  -2   7  12   15.60    5.40
   2  -7 -13   12.50    5.80
  -2   7  13   14.90    5.70
   2  -7 -14    7.80    6.10
  -2   7  14   -8.40    4.50
   2  -7 -15    5.20   10.30
  -2   7  15   -1.70    5.60
   2  -7 -16    3.00    5.90
  -2   7  16    7.50    6.30
  -1   7 -20   47.30    7.00
  -1   7 -19   67.69    8.90
  -1   7 -19   57.79    9.90
  -1   7 -18   34.40    8.00
  -1   7 -18   42.10    5.20
  -1   7 -18   39.00    6.20
  -1   7 -17   54.49    6.70
  -1   7 -17   53.19    9.00
  -1   7 -16   -2.00    5.10
  -1   7 -16   -0.60    2.80
  -1   7 -16    1.30    3.30
  -1   7 -15    3.00    3.20
  -1   7 -15   -1.10    2.60
  -1   7 -15   -1.30    5.20
  -1   7 -14    0.50    5.20
  -1   7 -14   12.20    3.60
  -1   7 -14   13.50    3.20
  -1   7 -13  137.09    9.20
  -1   7 -13  146.79   12.50
  -1   7 -13  158.98    8.80
   1  -7  12    8.20    4.80
  -1   7 -12    7.10    2.50
  -1   7 -12    5.20    2.80
   1  -7  11  289.97   16.40
  -1   7 -11  320.17   16.80
  -1   7 -11  271.47   13.40
  -1   7 -11  265.97   14.50
   1  -7  10   75.79    8.00
  -1   7 -10   72.39    7.80
  -1   7 -10   75.89    5.60
  -1   7 -10   71.59    5.60
   1  -7   9  105.39    8.80
  -1   7  -9  101.69    6.30
  -1   7  -9  102.89    8.70
  -1   7  -9   98.19    6.00
   1  -7   8   38.90    5.90
  -1   7  -8   35.70    6.80
  -1   7  -8   41.60    3.70
  -1   7  -8   39.50    3.70
   1  -7   7  407.96   20.30
  -1   7  -7  396.06   17.60
  -1   7  -7  393.56   17.80
  -1   7  -7  435.66   20.70
   1  -7   6   21.20    4.60
  -1   7  -6   26.30    4.80
  -1   7  -6   22.50    2.80
   1  -7   5    8.70    3.50
   1  -7   5   18.50    2.50
  -1   7  -5   15.90    2.40
  -1   7  -5   20.20    4.50
   1  -7   4    8.30    3.30
   1  -7   4    8.20    2.00
  -1   7  -4   13.50    2.30
  -1   7  -4    5.30    3.40
   1  -7   3  129.39    8.80
   1  -7   3  133.29    7.00
  -1   7  -3  126.29    7.00
  -1   7  -3  130.99    8.90
   1  -7   2   16.50    3.90
   1  -7   2   29.00    3.10
  -1   7  -2   31.60    4.80
  -1   7  -2   20.30    2.90
   1  -7   1  306.67   15.60
   1  -7   1  291.67   14.30
  -1   7  -1  311.87   14.00
  -1   7  -1  279.17   15.40
   1  -7   0   17.50    2.70
   1  -7   0   14.10    3.50
  -1   7   0   15.80    2.90
  -1   7   0   14.70    3.70
   1  -7  -1   35.50    3.60
   1  -7  -1   37.00    5.10
  -1   7   1   34.10    4.00
  -1   7   1   39.00    5.40
   1  -7  -2    5.90    3.40
   1  -7  -2    0.30    1.90
  -1   7   2    2.80    2.60
  -1   7   2    2.30    3.20
   1  -7  -3  156.88    8.50
   1  -7  -3  143.09    9.90
  -1   7   3  155.38    9.20
  -1   7   3  133.29    9.70
   1  -7  -4  107.09    8.80
   1  -7  -4  115.99    7.30
  -1   7   4  117.49    8.10
   1  -7  -5    0.10    3.60
   1  -7  -5    0.40    2.40
  -1   7   5    1.00    3.10
  -1   7   5   -1.00    3.10
   1  -7  -6   21.60    5.00
   1  -7  -6   16.00    3.70
  -1   7   6   17.50    4.40
   1  -7  -7   52.99    5.70
  -1   7   7   46.10    6.00
   1  -7  -8    7.70    4.60
   1  -7  -8    6.70    3.40
  -1   7   8    5.30    4.00
   1  -7  -9   32.10    6.10
  -1   7   9   41.50    6.40
   1  -7 -10    1.20    4.50
  -1   7  10   11.00    5.00
   1  -7 -11   -2.60    4.20
  -1   7  11    1.80    5.00
   1  -7 -12   27.90    6.80
  -1   7  12   34.30    6.90
   1  -7 -13   12.40    5.90
  -1   7  13   12.90    5.90
   1  -7 -14   -6.70    4.70
  -1   7  14   -0.90    5.40
   1  -7 -15   -1.40    5.80
  -1   7  15   -1.10    5.70
   0   7 -20   -1.20    4.60
   0   7 -20   11.40    7.40
   0   7 -20    0.30    3.90
   0   7 -19   -4.20    3.30
   0   7 -19    0.40    2.70
   0   7 -18  137.19    8.70
   0   7 -18  123.89    9.40
   0   7 -18  119.39   13.10
   0   7 -17    1.10    3.30
   0   7 -17   -1.00    2.70
   0   7 -17    4.40    6.40
   0   7 -16  404.86   24.40
   0   7 -16  400.96   19.40
   0   7 -16  422.56   19.10
   0   7 -15   -0.30    2.60
   0   7 -15    6.40    5.50
   0   7 -15   -0.20    2.40
   0   7 -14  309.77   19.90
   0   7 -14  327.07   15.10
   0   7 -13    0.30    2.10
   0   7 -13    2.90    2.10
   0  -7  12   99.89    9.80
   0   7 -12  102.99    6.20
   0   7 -12  104.89    6.10
   0   7 -11   -0.70    1.60
   0   7 -11   -0.40    1.70
   0  -7  10   20.80    5.30
   0   7 -10   28.50    2.70
   0   7 -10   27.90    2.70
   0  -7   9    2.10    3.90
   0   7  -9   -0.90    1.30
   0   7  -9   -1.90    1.20
   0   7  -9    3.20    3.70
   0  -7   8    2.90    3.90
   0   7  -8    0.30    3.40
   0   7  -8    6.20    1.40
   0   7  -8    5.10    1.30
   0  -7   7   -2.90    3.30
   0   7  -7   -4.40    3.10
   0   7  -7   -0.30    1.00
   0   7  -7    0.50    1.10
   0  -7   6   45.40    6.00
   0   7  -6   49.30    2.90
   0   7  -6   50.69    6.30
   0   7  -6   52.79    2.90
   0  -7   5    5.20    3.50
   0   7  -5   -0.30    1.10
   0   7  -5    1.10    1.00
   0   7  -5    0.70    3.20
   0  -7   4  308.17   13.00
   0  -7   4  285.17   15.90
   0   7  -4  295.97   13.10
   0   7  -4  320.77   16.40
   0  -7   3   -2.40    2.70
   0  -7   3    1.70    1.40
   0   7  -3    0.50    1.50
   0   7  -3    3.10    3.20
   0  -7   2   31.00    4.80
   0  -7   2   34.70    3.00
   0   7  -2   36.70    5.30
   0   7  -2   36.30    3.30
   0  -7   1   -1.00    1.40
   0  -7   1   -1.40    2.70
   0   7  -1    0.80    2.90
   0   7  -1   -1.80    1.80
   0  -7   0  455.35   22.80
   0  -7   0  480.05   20.40
   0   7   0  454.65   20.80
   0   7   0  503.25   23.10
   0  -7  -1   -0.40    2.90
   0  -7  -1   -1.20    1.60
   0   7   1   -2.40    2.10
   0   7   1   -3.00    2.80
   0  -7  -2   22.80    4.70
   0  -7  -2   32.70    3.40
   0   7   2   37.60    5.50
   0   7   2   24.00    3.80
   0  -7  -3    4.50    3.60
   0  -7  -3   -2.40    1.80
   0   7   3   -2.00    2.50
   0   7   3   -0.20    3.00
   0  -7  -4   -1.20    2.20
   0  -7  -4    2.10    3.60
   0   7   4    1.00    2.90
   0   7   4    4.20    3.60
   0  -7  -5   -4.40    2.10
   0  -7  -5    1.90    3.50
   0   7   5    0.50    3.20
   0  -7  -6   15.00    5.30
   0  -7  -6    3.40    2.80
   0   7   6    3.00    3.80
   0  -7  -7   -2.70    2.60
   0  -7  -7   -2.90    3.90
   0   7   7   -1.90    3.60
   0  -7  -8   15.20    5.20
   0  -7  -8   20.70    4.20
   0   7   8   17.60    4.70
   0  -7  -9   -3.20    4.10
   0   7   9    6.50    4.40
   0  -7 -10   30.80    6.60
   0   7  10   44.40    7.00
   0  -7 -11    9.50    5.70
   0   7  11   -3.60    4.50
   0  -7 -12   15.80    6.60
   0   7  12   10.70    6.00
   0  -7 -13   -1.00    5.70
   0   7  13    1.70    5.40
   0  -7 -14   -4.60    9.60
   0   7  14    2.70    5.80
   0  -7 -15   -0.80    5.70
   0   7  15   -1.50    9.70
   1   7 -19   39.10    5.00
   1   7 -19   34.90    9.20
   1   7 -18   29.40    9.20
   1   7 -18   21.90    3.90
   1   7 -18   22.60    3.60
   1   7 -17  127.99   14.00
   1   7 -17  114.69    7.10
   1   7 -17  114.59    7.50
   1   7 -16   20.30    3.20
   1   7 -16   15.10    2.80
   1   7 -16   25.00    8.00
   1   7 -15   97.39    6.10
   1   7 -15  115.09   12.60
   1   7 -15  106.69    6.00
   1   7 -14   -0.60    1.50
   1   7 -14   -3.80    5.30
   1   7 -14    0.80    1.50
   1   7 -13    8.90    1.40
   1   7 -13    8.80    1.40
  -1  -7  12    1.90    4.40
  -1  -7  11   62.79    7.80
  -1  -7  10    0.10    3.60
  -1  -7   9  113.99    9.90
  -1  -7   8   60.09    8.90
  -1  -7   7  264.37   15.50
  -1  -7   6   31.50    5.80
   1   7  -6   38.20    6.10
  -1  -7   5  247.88   14.80
   1   7  -5  265.87   15.10
  -1  -7   4    2.30    3.60
   1   7  -4    4.10    3.80
  -1  -7   3   16.60    4.40
   1   7  -3   19.30    4.70
  -1  -7   2    0.00    3.50
  -1  -7   2   -0.20    1.00
   1   7  -2    0.30    3.40
   1   7  -2    2.00    1.20
  -1  -7   1   45.00    3.10
  -1  -7   1   23.80    4.90
   1   7  -1   40.80    3.40
   1   7  -1   42.20    5.70
  -1  -7   0    5.10    1.70
  -1  -7   0    6.40    3.70
   1   7   0    4.30    3.50
   1   7   0    3.50    2.10
  -1  -7  -1   31.20    5.30
  -1  -7  -1   33.80    3.10
   1   7   1   26.80    3.50
   1   7   1   24.80    5.00
  -1  -7  -2   65.09    7.50
  -1  -7  -2   78.09    5.20
   1   7   2   88.09    8.50
  -1  -7  -3   44.90    6.50
  -1  -7  -3   39.70    4.00
   1   7   3   34.00    4.70
  -1  -7  -4   35.40    4.00
  -1  -7  -4   26.30    6.20
   1   7   4   26.10    4.60
  -1  -7  -5    4.90    4.10
  -1  -7  -5    1.50    2.40
   1   7   5   -0.90    3.30
  -1  -7  -6   14.90    3.50
  -1  -7  -6    6.30    4.20
   1   7   6   12.60    4.50
  -1  -7  -7   20.50    3.90
  -1  -7  -7   29.10    6.00
   1   7   7   15.60    4.90
  -1  -7  -8    6.20    4.80
  -1  -7  -8    1.00    3.20
   1   7   8    2.90    4.30
  -1  -7  -9   13.90    5.60
   1   7   9    4.70    7.20
  -1  -7 -10   37.90    7.20
   1   7  10   33.00    6.60
  -1  -7 -11   11.80    5.80
   1   7  11    8.40    5.50
  -1  -7 -12   -4.20    5.00
   1   7  12   -2.50    5.00
  -1  -7 -13    9.00    8.80
   1   7  13    5.80    5.70
  -1  -7 -14   -1.00    5.90
   1   7  14   10.30    6.40
   2   7 -18    0.80    6.70
   2   7 -17   -9.60    5.50
   2   7 -16    2.90    6.70
   2   7 -15   50.09    9.00
   2   7 -14   29.50    7.80
  -2  -7  12   70.49    9.30
  -2  -7  11   23.80    6.00
  -2  -7  10   25.80    6.30
  -2  -7   9   26.90    6.10
  -2  -7   8  166.38   12.40
  -2  -7   7   89.79    9.40
  -2  -7   6    7.00    4.60
  -2  -7   5   26.50    5.80
  -2  -7   4    3.10    4.10
  -2  -7   3   23.10    6.90
  -2  -7   2   20.30    8.50
  -2  -7   1    0.60    4.50
  -2  -7   1    0.50    1.00
  -2  -7   1   -0.40    1.10
  -2  -7   0    0.20    1.40
  -2  -7   0   -0.20    3.30
   2   7   0    0.10    1.50
  -2  -7  -1   12.30    2.20
  -2  -7  -1    8.20    4.20
   2   7   1   12.90    2.60
  -2  -7  -2   78.49    5.20
  -2  -7  -2   75.69    8.10
  -2  -7  -3   59.89    7.70
  -2  -7  -3   65.69    5.20
   2   7   3   75.49    6.20
  -2  -7  -4   53.79    4.90
  -2  -7  -4   49.50    6.90
   2   7   4   55.09    5.80
  -2  -7  -5    6.60    4.60
  -2  -7  -5    4.20    2.70
   2   7   5    0.90    3.30
  -2  -7  -6    0.10    4.20
  -2  -7  -6    3.30    2.90
   2   7   6    1.40    3.60
  -2  -7  -7   -3.30    2.60
  -2  -7  -7    0.00    4.50
   2   7   7    0.80    3.70
  -2  -7  -8   -1.80    4.30
   2   7   8    1.70    4.20
  -2  -7  -9    1.80    5.10
   2   7   9    6.00    4.80
  -2  -7 -10    1.50    5.30
   2   7  10   -3.40    4.50
  -2  -7 -11   11.50    5.80
   2   7  11   10.00    5.70
   2   7  12   -3.80    5.00
   3   7 -16   90.49   12.00
   3   7 -15    8.50    7.00
   3   7 -14  132.59   14.20
   3   7 -13   22.40    7.80
  -3  -7  12    6.40    5.70
  -3  -7  11    3.80    5.70
  -3  -7  10    6.00    5.50
  -3  -7   9   24.70    6.30
  -3  -7   8   -7.80    3.90
  -3  -7   7   13.70    5.30
  -3  -7   6   57.79    8.20
  -3  -7   5    2.10    4.60
  -3  -7   4  148.09   11.70
  -3  -7   3   14.10    5.20
  -3  -7   2   -1.60    4.10
  -3  -7   1    3.50    4.50
  -3  -7   0    8.60    5.00
  -3  -7   0    7.60    1.60
  -3  -7   0    3.50    1.70
  -3  -7  -1    3.60    4.20
  -3  -7  -1    2.50    1.70
  -3  -7  -1    5.30    2.20
  -3  -7  -2   13.30    3.10
  -3  -7  -2    8.80    2.30
  -3  -7  -2    8.90    5.00
  -3  -7  -3   11.40    4.90
  -3  -7  -3   16.70    2.90
  -3  -7  -4   11.20    2.90
  -3  -7  -4    6.40    4.70
   3   7   4   11.90    3.30
  -3  -7  -5    1.50    2.50
  -3  -7  -5    1.50    4.60
   3   7   5    0.60    3.10
  -3  -7  -6   22.70    4.00
  -3  -7  -6   12.40    5.40
   3   7   6   23.10    4.70
  -3  -7  -7    1.40    3.00
  -3  -7  -7   -4.80    4.30
   3   7   7    5.70    4.00
  -3  -7  -8   -2.40    4.90
   3   7   8   -2.00    3.90
  -3  -7  -9    6.40    5.40
   3   7   9    0.80    4.30
  -3  -7 -10    7.30    5.80
   3   7  10    4.90    4.90
   4   7 -13   18.70    7.80
  -4  -7  11   22.10    6.90
  -4  -7  10    3.40    5.40
  -4  -7   9   -1.60    4.80
  -4  -7   8    3.10    5.40
  -4  -7   7   58.29    8.90
  -4  -7   6   39.90    7.60
  -4  -7   5  186.48   14.00
  -4  -7   4   -4.00    4.40
  -4  -7   3  139.89   12.10
  -4  -7   2    3.00    4.70
  -4  -7   1   -1.30    4.60
  -4  -7   0    9.20    1.40
  -4  -7   0    8.30    1.50
  -4  -7   0   12.50    5.20
  -4  -7  -1   10.40    5.20
  -4  -7  -1    5.90    2.10
  -4  -7  -1    5.40    1.90
  -4  -7  -2    3.80    5.00
  -4  -7  -2    6.70    2.20
  -4  -7  -3    2.70    3.00
  -4  -7  -3    2.00    2.30
  -4  -7  -3   -4.20    4.40
  -4  -7  -4   18.70    3.30
  -4  -7  -4   20.80    6.10
  -4  -7  -4   20.00    4.20
  -4  -7  -5   10.00    4.10
  -4  -7  -5    1.70    4.90
  -4  -7  -6   -1.50    2.70
  -4  -7  -6    8.00    5.40
  -4  -7  -6    7.70    4.20
  -5  -7   7    9.90    5.90
  -5  -7   6   11.00    6.10
  -5  -7   5   -0.40    4.80
  -5  -7   4   13.50    6.10
  -5  -7   3   16.70    6.00
  -5  -7   2   22.10    6.70
  -5  -7   1    9.80    5.90
  -5  -7   0   -0.40    4.90
  -9   8  -4   19.90    7.10
  -9   8  -3    5.00    5.90
  -9   8  -2   -3.60    5.20
  -9   8  -1    5.00    5.80
  -9   8   0    8.10    5.90
  -9   8   1    4.60    5.70
  -9   8   2   10.50    5.80
  -8   8 -10   39.50    8.60
  -8   8  -9   42.10    8.80
  -8   8  -7   -1.00    5.00
  -8   8  -6    8.80    6.00
  -8   8  -5   -2.90    5.10
  -8   8  -4   95.09   10.30
  -8   8  -3   98.29   10.20
  -8   8  -2    6.10    5.30
   8  -8   1   37.10    2.80
  -8   8  -1   14.80    5.70
  -8   8  -1   23.10    2.60
   8  -8   0    1.50    2.00
  -8   8   0    1.90    5.10
  -8   8   0    4.60    2.20
   8  -8  -1    4.30    2.30
  -8   8   1   -7.10    4.50
   8  -8  -2    2.10    2.70
  -8   8   2    3.70    4.90
  -8   8   2    1.40    2.90
   8  -8  -3   37.60    4.50
  -8   8   3   25.70    6.30
  -8   8   3   21.70    4.30
   8  -8  -4    6.10    3.10
  -8   8   4    0.50    3.30
  -8   8   4    1.10    5.10
   8  -8  -5   62.99    6.20
  -8   8   5   65.09    7.10
   8  -8  -6  117.49    8.80
  -8   8   6  106.39    9.30
  -8   8   6   88.29    9.60
   8  -8  -7    6.50    4.10
  -8   8   7    1.40    4.70
   8  -8  -8   20.10    4.90
  -8   8   8   22.90    6.50
  -7   8 -13   77.09    5.80
  -7   8 -13   73.59   12.00
  -7   8 -12   28.60    3.40
  -7   8 -12   31.70    7.80
  -7   8 -12   25.50    3.00
  -7   8 -11   56.49    8.90
  -7   8 -11   55.49    4.10
  -7   8 -11   57.89    4.60
  -7   8 -10   -1.30    1.70
  -7   8 -10    2.60    1.60
  -7   8 -10    5.20    5.80
  -7   8  -9    3.70    1.70
  -7   8  -9    3.90    5.30
  -7   8  -9    1.30    1.80
  -7   8  -8    1.10    1.80
  -7   8  -8    0.20    1.50
  -7   8  -8   -1.60    5.10
  -7   8  -7    0.80    1.80
  -7   8  -7    1.60    1.60
  -7   8  -7    7.10    4.90
  -7   8  -6    4.70    1.90
  -7   8  -6    6.00    4.80
  -7   8  -6    7.50    2.20
  -7   8  -5    2.90    4.90
  -7   8  -5   -0.80    1.70
   7  -8   4   33.10    3.50
  -7   8  -4   28.20    6.40
  -7   8  -4   27.30    3.20
   7  -8   3  161.78    8.40
  -7   8  -3  143.29    8.40
  -7   8  -3  165.38   12.30
   7  -8   2   46.90    4.40
  -7   8  -2   35.40    6.80
  -7   8  -2   51.59    4.70
   7  -8   1  160.98    8.40
  -7   8  -1  129.89   11.20
  -7   8  -1  133.19    8.60
   7  -8   0   -2.00    2.20
  -7   8   0    5.40    4.60
  -7   8   0    0.20    2.50
   7  -8  -1   -1.00    2.50
  -7   8   1   -2.20    2.60
  -7   8   1    0.50    4.50
   7  -8  -2   25.90    4.10
  -7   8   2   29.10    4.60
  -7   8   2   29.10    6.20
   7  -8  -3   -5.80    2.50
  -7   8   3    3.40    4.30
  -7   8   3    6.10    3.40
   7  -8  -4    9.90    3.60
  -7   8   4   14.90    4.30
  -7   8   4   17.10    5.10
   7  -8  -5   22.40    4.30
  -7   8   5   12.30    5.10
  -7   8   5   17.00    4.50
   7  -8  -6   36.60    5.50
  -7   8   6   21.10    5.70
  -7   8   6   42.60    6.30
   7  -8  -7   16.60    4.60
  -7   8   7   24.50    6.10
   7  -8  -8   27.20    5.50
  -7   8   8   15.50    5.30
   7  -8  -9    9.90    4.70
  -7   8   9    3.50    5.60
   7  -8 -10    8.90    4.70
  -7   8  10    6.90    5.80
  -6   8 -16   -4.20    6.20
  -6   8 -16    1.90    3.80
  -6   8 -15   27.20    4.40
  -6   8 -15   13.70    4.60
  -6   8 -15   16.80    6.80
  -6   8 -14    3.00    2.80
  -6   8 -14   -4.20    3.20
  -6   8 -14   -3.40    5.30
  -6   8 -13    0.80    2.80
  -6   8 -13    1.10    5.10
  -6   8 -13    7.60    3.90
  -6   8 -12   41.50    8.20
  -6   8 -12   43.00    5.00
  -6   8 -12   30.50    5.30
  -6   8 -11    3.30    5.20
  -6   8 -11   -3.70    2.30
  -6   8 -11   -0.10    3.20
  -6   8 -10   31.20    6.90
  -6   8 -10   33.00    4.20
  -6   8 -10   21.90    4.30
  -6   8  -9   24.40    6.20
  -6   8  -9   27.00    4.50
  -6   8  -9   21.30    3.50
  -6   8  -8   -2.40    2.80
  -6   8  -8    0.50    2.30
  -6   8  -8    4.30    4.70
   6  -8   7   -3.40    2.30
  -6   8  -7    0.60    2.20
  -6   8  -7    3.00    4.50
   6  -8   6   -4.70    2.20
  -6   8  -6    2.30    2.40
  -6   8  -6   -4.70    3.70
   6  -8   5  161.08   10.40
  -6   8  -5  173.18   12.10
  -6   8  -5  160.78    9.20
  -6   8  -4   12.50    3.00
  -6   8  -4    4.30    4.50
   6  -8   3  408.16   18.80
  -6   8  -3  410.56   21.10
  -6   8  -3  404.86   19.00
   6  -8   2  161.98    9.40
  -6   8  -2  163.58   11.60
  -6   8  -2  170.18    9.70
   6  -8   1  114.49    7.70
  -6   8  -1  118.79    9.90
  -6   8  -1  117.89    8.00
   6  -8   0  165.68    9.70
  -6   8   0  152.28   11.20
  -6   8   0  164.98   10.00
   6  -8  -1   30.20    4.40
  -6   8   1   30.70    4.60
  -6   8   1   23.90    5.40
   6  -8  -2    1.70    3.10
  -6   8   2    3.30    3.10
  -6   8   2    1.00    4.00
   6  -8  -3  145.89    9.50
  -6   8   3  142.39    9.90
  -6   8   3  133.69   10.70
   6  -8  -4    1.80    3.20
  -6   8   4    2.20    4.20
   6  -8  -5    8.30    3.70
  -6   8   5    1.90    3.90
  -6   8   5   -1.20    3.40
   6  -8  -6   20.10    4.80
  -6   8   6   17.00    5.50
  -6   8   6   16.80    4.80
   6  -8  -7   45.00    7.00
  -6   8   7   41.10    7.00
   6  -8  -8    2.30    3.90
  -6   8   8   -0.60    4.80
   6  -8  -9   61.89    7.90
  -6   8   9   68.89    8.90
   6  -8 -10   14.30    5.50
  -6   8  10    0.00    5.00
   6  -8 -11    4.50    5.10
  -6   8  11    0.80    7.90
   6  -8 -12    2.30    5.30
  -6   8  12    1.90    5.60
  -5   8 -17    1.50    5.60
  -5   8 -17    2.50    4.90
  -5   8 -16   23.60    5.90
  -5   8 -16   21.50    6.60
  -5   8 -15   -0.90    4.20
  -5   8 -15   -0.20    5.20
  -5   8 -15    0.40    3.30
  -5   8 -14    4.40    4.30
  -5   8 -14   -2.70    4.60
  -5   8 -14    5.00    3.60
  -5   8 -13    6.10    3.50
  -5   8 -13   -4.20    4.40
  -5   8 -13    4.10    4.10
  -5   8 -12   92.79    9.80
  -5   8 -12   92.69    7.90
  -5   8 -12   89.99    8.70
  -5   8 -11   70.69    8.10
  -5   8 -11   69.19    6.90
  -5   8 -11   56.19    7.00
  -5   8 -10  292.37   15.00
  -5   8 -10  275.97   16.70
  -5   8 -10  265.17   15.50
   5  -8   9    5.90    3.60
  -5   8  -9    9.40    3.30
   5  -8   8   54.39    5.80
  -5   8  -8   51.99    5.60
  -5   8  -8   44.70    6.40
   5  -8   7    1.40    2.90
   5  -8   7    1.20    3.20
  -5   8  -7    2.70    3.70
  -5   8  -7    4.20    2.90
   5  -8   6   52.99    6.40
   5  -8   6   54.59    5.60
  -5   8  -6   56.69    5.80
  -5   8  -6   55.69    6.90
   5  -8   5   -3.00    2.60
   5  -8   5   -3.30    2.80
  -5   8  -5    2.20    3.50
  -5   8  -5    3.20    2.70
   5  -8   4    6.60    3.40
   5  -8   4    5.20    2.90
  -5   8  -4    2.20    3.60
  -5   8  -4    5.80    2.90
   5  -8   3   -1.20    2.90
   5  -8   3    1.80    2.50
  -5   8  -3    1.50    3.20
  -5   8  -3   -0.80    2.50
   5  -8   2  103.29    7.40
   5  -8   2  103.99    8.50
  -5   8  -2  117.09    7.90
  -5   8  -2  102.09    8.70
   5  -8   1    5.50    2.90
   5  -8   1    8.70    3.50
  -5   8  -1   -0.10    2.80
  -5   8  -1    8.10    4.00
   5  -8   0  353.26   17.40
   5  -8   0  354.96   18.10
  -5   8   0  351.16   18.30
  -5   8   0  358.96   17.70
   5  -8  -1    7.60    3.40
  -5   8   1    6.50    3.20
  -5   8   1    3.00    3.50
   5  -8  -2  159.78   10.20
  -5   8   2  159.88   11.20
  -5   8   2  178.08   10.70
   5  -8  -3    5.00    3.40
  -5   8   3   14.30    4.00
  -5   8   3   10.10    4.40
   5  -8  -4   30.60    5.00
  -5   8   4   26.80    5.10
  -5   8   4   36.10    5.50
   5  -8  -5   12.00    4.10
  -5   8   5    9.20    4.60
  -5   8   5   19.10    4.70
   5  -8  -6   -1.30    3.60
  -5   8   6   -1.10    3.70
  -5   8   6   -1.40    3.60
   5  -8  -7    6.70    5.90
  -5   8   7    9.80    4.60
   5  -8  -8   -1.20    4.00
  -5   8   8   -0.30    4.20
   5  -8  -9   -2.60    4.20
  -5   8   9   -3.20    4.40
   5  -8 -10   14.70    5.30
  -5   8  10    5.50    5.00
   5  -8 -11   -1.30    4.50
  -5   8  11  -10.90    4.70
   5  -8 -12    5.30    5.20
  -5   8  12    4.70    5.80
   5  -8 -13   10.00    6.00
  -5   8  13    6.80    5.40
  -4   8 -18    6.80    5.40
  -4   8 -18   -6.20    4.80
  -4   8 -17    7.90    5.50
  -4   8 -17    0.50    5.10
  -4   8 -16    5.20    5.00
  -4   8 -16    4.60    5.30
  -4   8 -15    2.50    4.70
  -4   8 -14   -4.50    4.40
  -4   8 -14    1.90    3.60
  -4   8 -14    5.20    4.50
  -4   8 -13  132.59   10.20
  -4   8 -13  119.99   11.40
  -4   8 -12   49.10    7.00
  -4   8 -12   57.29    6.80
  -4   8 -12   51.39    6.70
  -4   8 -12   59.49    7.60
  -4   8 -11  598.84   27.50
  -4   8 -11  587.84   29.60
  -4   8 -11  607.14   28.60
   4  -8  10    5.20    3.80
  -4   8 -10    2.50    3.60
  -4   8 -10    8.50    4.00
  -4   8 -10    1.20    3.00
   4  -8   9  230.58   13.40
  -4   8  -9  212.08   13.60
  -4   8  -9  248.68   13.60
  -4   8  -9  241.68   13.00
   4  -8   8   -3.00    3.10
  -4   8  -8   -0.20    3.10
  -4   8  -8    4.70    3.50
   4  -8   7   10.10    3.80
   4  -8   7    6.90    3.40
  -4   8  -7    3.70    3.20
  -4   8  -7    4.70    3.40
   4  -8   6  131.59    9.00
   4  -8   6  130.89    9.00
  -4   8  -6  141.29    9.30
  -4   8  -6  130.79    9.40
   4  -8   5  831.22   35.60
   4  -8   5  805.32   35.50
  -4   8  -5  820.92   35.90
  -4   8  -5  771.32   35.60
   4  -8   4    7.00    3.20
   4  -8   4    6.60    3.10
  -4   8  -4    2.30    3.10
  -4   8  -4    5.70    3.00
   4  -8   3   15.10    3.80
   4  -8   3   16.00    3.70
  -4   8  -3    9.80    3.60
  -4   8  -3   12.50    3.60
   4  -8   2   60.09    6.20
   4  -8   2   84.09    7.10
  -4   8  -2   66.89    6.40
  -4   8  -2   67.89    6.60
   4  -8   1  638.54   28.70
   4  -8   1  586.44   27.20
  -4   8  -1  583.44   27.30
  -4   8  -1  587.64   27.30
   4  -8   0   46.50    5.80
   4  -8   0   45.10    6.40
  -4   8   0   52.79    5.90
  -4   8   0   56.79    6.20
   4  -8  -1  639.54   28.70
   4  -8  -1  647.84   28.90
  -4   8   1  634.34   29.00
  -4   8   1  605.04   28.80
   4  -8  -2   27.10    4.70
   4  -8  -2   25.30    4.50
  -4   8   2   23.20    4.50
  -4   8   2   32.70    5.50
   4  -8  -3  311.67   16.40
   4  -8  -3  320.47   16.20
  -4   8   3  329.87   16.80
  -4   8   3  285.47   16.20
   4  -8  -4   51.29    6.10
   4  -8  -4   47.60    6.10
  -4   8   4   37.50    5.60
  -4   8   4   44.20    6.00
   4  -8  -5  111.39    9.20
  -4   8   5  138.29   10.70
  -4   8   5  106.09    9.10
   4  -8  -6    7.70    4.40
  -4   8   6   11.60    4.40
   4  -8  -7    7.00    4.20
  -4   8   7   10.30    4.80
   4  -8  -8    1.20    4.20
  -4   8   8    4.50    4.50
   4  -8  -9   -4.60    3.80
  -4   8   9   -1.40    4.00
   4  -8 -10    4.50    4.90
  -4   8  10   13.00    5.50
   4  -8 -11    5.40    5.20
  -4   8  11    3.60    4.60
   4  -8 -12    3.70    5.20
  -4   8  12   -0.60    4.70
   4  -8 -13    7.70    6.10
  -4   8  13   14.90    6.70
   4  -8 -14    2.10    5.30
  -4   8  14    2.20    5.40
  -3   8 -19   11.70    6.40
  -3   8 -19   14.80    5.70
  -3   8 -18   82.59    9.60
  -3   8 -18   62.89    9.60
  -3   8 -17   29.50    6.40
  -3   8 -17   31.80    7.50
  -3   8 -16    8.60    4.90
  -3   8 -16    9.90    5.70
  -3   8 -15    5.60    4.40
  -3   8 -15    4.40    4.30
  -3   8 -15   -3.00    4.70
  -3   8 -14   18.40    5.90
  -3   8 -14   26.80    4.30
  -3   8 -14   12.60    4.50
  -3   8 -13   67.39    7.40
  -3   8 -13   77.19    7.00
  -3   8 -13   87.89    9.60
  -3   8 -12    7.30    3.40
  -3   8 -12   18.70    5.00
  -3   8 -12   11.00    4.10
   3  -8  11   54.59    6.90
  -3   8 -11   62.49    7.20
  -3   8 -11   59.59    5.80
  -3   8 -11   65.09    6.90
   3  -8  10  323.27   17.10
  -3   8 -10  309.77   15.50
  -3   8 -10  309.27   17.20
  -3   8 -10  311.57   16.30
   3  -8   9    4.00    3.60
  -3   8  -9    3.60    2.60
  -3   8  -9   -0.30    3.60
  -3   8  -9    2.20    3.00
   3  -8   8  226.98   13.30
  -3   8  -8  241.38   13.60
  -3   8  -8  224.18   12.50
  -3   8  -8  222.08   11.90
   3  -8   7  161.88   11.00
   3  -8   7  193.88   10.30
  -3   8  -7  164.48   10.30
  -3   8  -7  184.28   11.40
   3  -8   6  136.69    9.70
   3  -8   6  159.18    9.30
  -3   8  -6  171.88    9.70
  -3   8  -6  135.89    9.90
   3  -8   5    6.90    3.00
   3  -8   5    9.00    3.40
  -3   8  -5    6.80    3.60
  -3   8  -5    1.80    2.80
   3  -8   4   23.30    3.70
   3  -8   4   19.90    4.20
  -3   8  -4   23.50    3.90
  -3   8  -4   20.30    4.20
   3  -8   3   98.39    7.00
   3  -8   3   96.99    7.70
  -3   8  -3   90.09    7.00
  -3   8  -3   95.49    7.70
   3  -8   2   27.70    4.60
   3  -8   2   37.70    4.40
  -3   8  -2   35.10    4.60
  -3   8  -2   31.90    4.90
   3  -8   1   18.70    3.40
   3  -8   1    6.00    3.30
  -3   8  -1   10.20    3.70
  -3   8  -1    9.90    3.30
   3  -8   0  164.88   10.90
   3  -8   0  193.98   10.40
  -3   8   0  175.68   11.10
  -3   8   0  180.58   10.50
   3  -8  -1    5.80    3.60
   3  -8  -1   -2.40    2.50
  -3   8   1    0.00    3.40
  -3   8   1    2.10    2.90
   3  -8  -2   15.90    4.30
   3  -8  -2   18.00    3.70
  -3   8   2   18.00    4.00
  -3   8   2   20.60    4.60
   3  -8  -3  159.68   12.80
   3  -8  -3  130.99    9.80
  -3   8   3  146.49   10.10
  -3   8   3  133.59    9.40
   3  -8  -4  141.29   10.40
   3  -8  -4  140.49    9.40
  -3   8   4  156.08   10.50
  -3   8   4  154.88   10.00
   3  -8  -5    8.00    3.30
   3  -8  -5   16.00    4.70
  -3   8   5   10.20    4.10
   3  -8  -6   35.00    7.40
  -3   8   6   32.20    5.40
   3  -8  -7    8.20    4.40
  -3   8   7    5.00    4.20
   3  -8  -8    1.70    4.40
  -3   8   8   -2.60    3.80
   3  -8  -9    6.70    4.80
  -3   8   9   -4.60    4.10
   3  -8 -10   16.90    6.10
  -3   8  10   19.60    5.60
   3  -8 -11   10.80    5.50
  -3   8  11   10.50    5.50
   3  -8 -12   -4.20    5.00
  -3   8  12    2.10    5.10
   3  -8 -13    3.10    5.80
  -3   8  13    7.00    5.40
   3  -8 -14    6.40    6.40
  -3   8  14    4.80    5.90
  -2   8 -19   50.99    9.60
  -2   8 -19   57.09    7.70
  -2   8 -18   53.89    7.40
  -2   8 -18   65.59   10.00
  -2   8 -17   27.00    5.60
  -2   8 -17   32.30    7.70
  -2   8 -17   41.10    5.30
  -2   8 -16   -2.90    3.50
  -2   8 -16    0.40    2.70
  -2   8 -16    2.90    6.00
  -2   8 -15   20.70    6.60
  -2   8 -15   22.80    4.30
  -2   8 -15   25.90    5.10
  -2   8 -14   80.49    9.90
  -2   8 -14   88.39    6.90
  -2   8 -14   81.49    7.40
  -2   8 -13  101.49    8.10
  -2   8 -13  114.19    7.80
  -2   8 -12  228.08   12.90
  -2   8 -12  244.78   12.30
   2  -8  11    6.90    4.20
  -2   8 -11    6.40    3.10
  -2   8 -11    5.40    2.60
   2  -8  10  347.87   18.40
  -2   8 -10  320.67   16.30
  -2   8 -10  329.57   15.80
  -2   8 -10  346.57   18.50
   2  -8   9  543.65   26.20
  -2   8  -9  519.35   23.70
  -2   8  -9  569.14   26.60
  -2   8  -9  532.15   24.10
   2  -8   8  993.90   43.80
  -2   8  -8 1037.20   44.30
  -2   8  -8  981.20   41.50
  -2   8  -8  944.91   41.80
   2  -8   7  648.14   31.40
  -2   8  -7  717.53   32.00
  -2   8  -7  697.03   29.90
   2  -8   6  546.25   23.10
   2  -8   6  502.55   24.90
  -2   8  -6  527.35   25.10
  -2   8  -6  498.75   23.10
   2  -8   5   95.09    6.40
   2  -8   5   89.29    8.00
  -2   8  -5   98.09    6.70
  -2   8  -5  110.89    8.70
   2  -8   4   36.30    3.90
   2  -8   4   32.50    5.20
  -2   8  -4   34.50    5.30
  -2   8  -4   41.90    4.40
   2  -8   3   80.09    7.70
   2  -8   3   97.99    6.50
  -2   8  -3   98.29    8.10
  -2   8  -3   93.29    6.60
   2  -8   2  735.43   31.10
   2  -8   2  719.33   32.70
  -2   8  -2  722.73   31.20
  -2   8  -2  703.03   32.70
   2  -8   1  262.47   14.70
   2  -8   1  279.37   13.30
  -2   8  -1  267.37   13.40
  -2   8  -1  256.37   14.70
   2  -8   0    1.50    3.40
   2  -8   0    1.50    2.30
  -2   8   0    3.20    3.50
  -2   8   0    1.80    2.50
   2  -8  -1   71.99    7.30
   2  -8  -1   70.99    5.80
  -2   8   1   64.49    6.90
  -2   8   1   61.79    5.80
   2  -8  -2   94.29    8.50
   2  -8  -2   89.69    6.60
  -2   8   2   78.99    7.00
  -2   8   2   91.19    7.90
   2  -8  -3   43.60    5.00
   2  -8  -3   43.80    6.20
  -2   8   3   47.70    6.40
  -2   8   3   41.10    5.40
   2  -8  -4  258.07   13.60
   2  -8  -4  252.57   15.10
  -2   8   4  272.47   14.40
   2  -8  -5  127.49    8.70
   2  -8  -5  127.69   14.50
  -2   8   5  125.59    9.40
   2  -8  -6   23.40    5.40
   2  -8  -6   32.20    4.70
  -2   8   6   25.50    5.20
   2  -8  -7   -3.90    3.70
  -2   8   7    3.80    3.80
   2  -8  -8   27.80    6.00
  -2   8   8   30.50    5.70
   2  -8  -9    6.20    4.70
  -2   8   9   15.40    5.10
   2  -8 -10    5.20    5.10
  -2   8  10    3.60    4.50
   2  -8 -11    7.40    5.50
  -2   8  11    2.90    4.60
   2  -8 -12   -0.70    5.00
  -2   8  12    3.70    5.40
  -2   8  13    6.10    5.80
   2  -8 -14    4.80    5.80
  -2   8  14    2.00    7.90
  -1   8 -19   49.20    5.50
  -1   8 -19   40.20    6.20
  -1   8 -19   60.69    9.90
  -1   8 -18   15.90    4.70
  -1   8 -18   18.90    7.30
  -1   8 -18   23.10    4.00
  -1   8 -17  125.89   13.50
  -1   8 -17  128.99    9.50
  -1   8 -17  131.39    8.50
  -1   8 -16   22.70    4.60
  -1   8 -16   22.50    3.80
  -1   8 -16    8.40    6.60
  -1   8 -15  109.59   12.10
  -1   8 -15  119.99    7.50
  -1   8 -15   88.79    7.60
  -1   8 -14    4.90    2.70
  -1   8 -14    0.20    2.70
  -1   8 -14    4.60    5.80
   1  -8  13    6.50    5.20
  -1   8 -13   10.50    2.90
  -1   8 -13    9.10    3.00
   1  -8  12    2.90    4.20
  -1   8 -12    2.00    2.10
   1  -8  11   55.99    7.40
  -1   8 -11   58.79    5.00
   1  -8  10    6.40    5.20
  -1   8 -10   -0.80    1.90
  -1   8 -10    0.90    1.80
   1  -8   9  136.79   10.70
  -1   8  -9  131.39    7.10
  -1   8  -9  133.49    7.40
   1  -8   8   57.09    7.10
  -1   8  -8   51.29    4.30
  -1   8  -8   49.80    4.10
  -1   8  -8   52.99    8.40
   1  -8   7  277.87   15.50
  -1   8  -7  251.67   12.20
  -1   8  -7  280.67   12.50
  -1   8  -7  269.47   15.60
   1  -8   6   34.90    6.00
  -1   8  -6   40.40    3.60
  -1   8  -6   30.40    5.40
   1  -8   5  223.88   13.80
   1  -8   5  248.68   11.30
  -1   8  -5  226.28   11.30
  -1   8  -5  264.67   14.50
   1  -8   4    1.10    3.50
   1  -8   4   -0.40    1.80
  -1   8  -4    0.60    1.90
  -1   8  -4    9.70    3.80
   1  -8   3   25.50    5.10
   1  -8   3   26.10    3.10
  -1   8  -3   21.40    4.90
  -1   8  -3   18.80    3.00
   1  -8   2   -0.60    1.80
   1  -8   2    1.10    3.10
  -1   8  -2   -0.10    2.10
  -1   8  -2    1.00    3.40
   1  -8   1   37.30    5.80
   1  -8   1   36.30    3.80
  -1   8  -1   46.30    4.80
  -1   8  -1   46.80    6.30
   1  -8   0    2.10    3.40
   1  -8   0    6.10    2.30
  -1   8   0    3.80    2.70
  -1   8   0    2.90    3.40
   1  -8  -1   29.80    3.60
   1  -8  -1   29.50    5.20
  -1   8   1   16.80    3.70
  -1   8   1   40.50    5.90
   1  -8  -2   77.79    5.70
   1  -8  -2   64.19    7.40
  -1   8   2   70.09    6.30
   1  -8  -3   35.00    4.20
   1  -8  -3   41.10    8.00
  -1   8   3   32.50    4.90
   1  -8  -4   28.80    4.00
   1  -8  -4   24.00    5.10
  -1   8   4   31.50    5.00
   1  -8  -5    4.60    4.00
   1  -8  -5    2.10    3.00
  -1   8   5    2.40    3.60
   1  -8  -6    9.30    3.50
   1  -8  -6   11.00    5.00
  -1   8   6   12.20    4.30
   1  -8  -7   24.60    4.50
   1  -8  -7   36.20    6.60
  -1   8   7   19.60    4.90
   1  -8  -8   -0.20    4.20
  -1   8   8    6.60    6.80
   1  -8  -9    5.10    4.90
  -1   8   9   -0.10    4.40
   1  -8 -10   33.60    7.00
  -1   8  10   33.00    6.50
   1  -8 -11    7.20    5.60
  -1   8  11    9.50    5.70
   1  -8 -12    2.90    5.70
  -1   8  12    3.00    5.20
   1  -8 -13    0.70    5.40
  -1   8  13   -1.90    5.50
   1  -8 -14   -2.30    5.70
  -1   8  14   -2.80    6.40
   0   8 -18  174.08   10.80
   0   8 -18  156.08   15.70
   0   8 -18  205.98   11.10
   0   8 -17   -4.70    5.60
   0   8 -17    0.70    2.60
   0   8 -17    1.40    2.30
   0   8 -16  522.95   23.00
   0   8 -16  520.75   23.60
   0   8 -16  542.45   29.60
   0   8 -15    2.70    2.30
   0   8 -15    0.00    2.00
   0   8 -15   -2.30    5.40
   0   8 -14  191.08    9.70
   0   8 -14  200.28    9.60
   0  -8  13   -0.20    5.10
   0   8 -13   -0.60    1.70
   0   8 -13    0.30    1.70
   0  -8  12   80.69    9.60
   0   8 -12   94.09    5.00
   0   8 -12   93.19    5.00
   0  -8  11    0.30    4.20
   0   8 -11    0.40    1.20
   0   8 -11   -0.30    1.20
   0  -8  10  855.31   39.70
   0  -8   9   -1.80    4.00
   0  -8   8    1.30    4.00
   0  -8   7   -0.70    3.70
   0   8  -6  684.43   27.60
   0  -8   5   -0.90    3.90
   0   8  -5   -2.10    1.10
   0   8  -5   -1.50    1.00
   0  -8   4  921.41   42.30
   0  -8   4 1020.70   38.60
   0   8  -4  885.31   38.60
   0  -8   3   -3.10    3.10
   0  -8   3   -1.80    1.40
   0   8  -3   -2.00    1.60
   0  -8   2  122.79    9.90
   0  -8   2  141.59    6.90
   0   8  -2  122.09    7.10
   0  -8   1   -1.80    1.70
   0  -8   1   -3.30    3.00
   0   8  -1    0.80    2.20
   0  -8   0  100.59    6.00
   0   8   0   90.89    6.50
   0  -8  -1   -2.50    1.80
   0  -8  -1    4.20    3.60
   0   8   1   -0.80    2.50
   0  -8  -2   61.69    4.90
   0  -8  -2   51.19    6.70
   0   8   2   52.49    5.60
   0  -8  -3    3.10    3.90
   0  -8  -3    0.50    2.30
   0   8   3    2.00    3.20
   0  -8  -4   38.10    6.40
   0  -8  -4   26.10    3.70
   0   8   4   33.00    5.10
   0  -8  -5    1.90    4.10
   0  -8  -5   -4.70    2.40
   0   8   5    1.20    3.70
   0  -8  -6   10.10    4.90
   0  -8  -6    5.80    3.10
   0   8   6    5.20    4.00
   0  -8  -7   -3.70    2.60
   0  -8  -7    0.00    4.70
   0   8   7   -2.00    4.00
   0  -8  -8   21.20    6.10
   0  -8  -9   -8.10    4.30
   0   8   9    0.90    4.70
   0  -8 -10   -3.70    4.90
   0   8  10   -0.60    4.80
   0  -8 -11   -4.10    5.40
   0   8  11    0.90    5.20
   0  -8 -12    1.60    6.10
   0   8  12   12.20    6.00
   0  -8 -13   -2.50    5.40
   0   8  13    0.00    5.50
   1   8 -17   74.99   11.00
   1   8 -17   64.99    3.80
   1   8 -15  167.98   16.20
  -1  -8  13   63.29    9.40
  -1  -8  12   -4.30    4.30
  -1  -8  11   24.00    5.80
  -1  -8  10    6.70    5.00
  -1  -8   9   23.90    5.90
  -1  -8   8   -1.40    3.90
  -1  -8   7   83.09    9.20
  -1  -8   6   15.60    5.30
  -1  -8   5  215.18   14.10
  -1  -8   4   30.60    5.70
  -1  -8   3   79.59    8.60
  -1  -8   2    0.80    1.10
  -1  -8   2    0.60    3.70
   1   8  -2    1.10    1.20
  -1  -8   1    9.70    1.90
  -1  -8   1    9.10    4.50
   1   8  -1   11.10    2.10
  -1  -8   0   19.50    2.60
  -1  -8   0   18.10    5.10
   1   8   0   18.60    2.80
  -1  -8  -1    1.20    4.00
  -1  -8  -1    3.00    2.10
   1   8   1    6.10    2.50
  -1  -8  -2    6.70    2.30
  -1  -8  -2   10.50    4.50
   1   8   2    6.50    2.90
  -1  -8  -3   -1.60    2.00
  -1  -8  -3   -0.90    3.80
   1   8   3    4.40    3.10
  -1  -8  -4    9.10    4.60
  -1  -8  -4    8.00    2.70
   1   8   4    7.30    3.60
  -1  -8  -5   34.00    6.90
  -1  -8  -5   51.19    5.10
   1   8   5   39.10    5.70
  -1  -8  -6   -0.80    2.70
  -1  -8  -6    4.30    5.10
   1   8   6   -2.90    3.60
  -1  -8  -7   12.60    5.70
  -1  -8  -7    0.60    3.00
   1   8   7   -1.60    3.80
  -1  -8  -8   20.60    6.00
   1   8   8   13.00    5.20
  -1  -8  -9    1.80    4.80
   1   8   9    4.30    4.70
  -1  -8 -10    3.70    5.70
   1   8  10    1.40    4.70
  -1  -8 -11   -1.40    5.50
   1   8  11    3.80    5.00
   2   8 -16   31.70    8.30
   2   8 -15   50.59   10.10
  -2  -8  13  269.87   18.50
  -2  -8  12  268.97   18.10
  -2  -8  11   57.39    8.80
  -2  -8  10    3.00    5.20
  -2  -8   9   11.70    5.70
  -2  -8   8   95.69   10.30
  -2  -8   7   23.70    6.00
  -2  -8   6   15.50    5.70
  -2  -8   5    2.70    4.80
  -2  -8   4    1.70    4.70
  -2  -8   3   69.89    8.30
  -2  -8   2   91.69    9.30
  -2  -8   1   14.30    5.30
  -2  -8   0   23.70    2.40
  -2  -8   0   15.60    5.60
  -2  -8  -1   12.70    2.30
  -2  -8  -1   12.70    5.00
   2   8   1   12.80    2.60
  -2  -8  -2    7.10    2.20
  -2  -8  -2    4.40    4.40
   2   8   2    2.80    2.50
  -2  -8  -3    2.00    2.20
  -2  -8  -3   -3.00    3.90
   2   8   3    0.30    2.60
  -2  -8  -4    2.60    4.70
  -2  -8  -4    3.40    2.50
   2   8   4    4.60    3.20
  -2  -8  -5   -4.20    2.30
  -2  -8  -5    5.60    4.90
   2   8   5    4.50    3.60
  -2  -8  -6    4.00    3.00
  -2  -8  -6   -0.10    4.60
   2   8   6    4.50    3.80
  -2  -8  -7    6.10    5.60
   2   8   7    2.70    4.30
  -2  -8  -8    0.30    4.90
   2   8   8    3.50    4.70
  -2  -8  -9    3.10    9.60
   2   8   9    4.80    4.80
  -3  -8  12  106.59   12.00
  -3  -8  11   11.00    6.50
  -3  -8  10   11.00    6.00
  -3  -8   9    8.00    5.70
  -3  -8   8   20.10    6.70
  -3  -8   7   20.50    6.70
  -3  -8   6   -0.50    4.60
  -3  -8   5   11.50    5.40
  -3  -8   4   33.90    7.30
  -3  -8   3   19.70    6.30
  -3  -8   2   98.09   10.70
  -3  -8   1   35.30    6.70
  -3  -8   0    3.30    5.40
  -3  -8  -1    2.00    1.60
  -3  -8  -1    1.20    1.80
  -3  -8  -1    4.00    5.10
  -3  -8  -2   -2.10    4.40
  -3  -8  -2    0.30    1.80
  -3  -8  -2   -0.70    2.30
  -3  -8  -3    1.70    2.10
  -3  -8  -3   -1.70    4.60
  -3  -8  -3   -2.60    2.70
  -3  -8  -4    3.80    4.90
  -3  -8  -4   -1.30    2.30
  -3  -8  -5    3.90    5.30
  -3  -8  -5   -3.90    2.70
   3   8   5   -3.10    2.80
  -3  -8  -6    2.60    5.00
  -3  -8  -6    0.00    2.70
   3   8   6   -1.30    3.30
  -4  -8   8   -1.70    5.40
  -4  -8   6    2.00    5.30
  -4  -8   5    4.40    5.40
  -4  -8   4    2.30    5.20
  -4  -8   3    0.90    5.20
  -4  -8   2   -1.70    5.10
  -4  -8   1    9.10    6.00
  -4  -8   0   -4.00    5.00
  -4  -8  -1   -5.60    4.50
  -8   9  -9    7.30    6.10
  -8   9  -8    3.10    6.00
  -8   9  -7    7.60    6.60
  -8   9  -6   19.30   10.70
  -8   9  -5   72.69   14.60
  -8   9  -4   28.70    7.30
  -8   9  -4   19.70    2.00
  -8   9  -4   21.40    2.10
   8  -9   3    4.90    1.90
  -8   9  -3    1.40    5.40
  -8   9  -3    3.10    2.10
   8  -9   2   29.70    3.30
  -8   9  -2   19.50    6.40
  -8   9  -2   26.00    3.60
   8  -9   1    0.30    2.30
  -8   9  -1    0.40    3.90
  -8   9  -1   -0.70    4.90
   8  -9   0   59.49    5.30
  -8   9   0   71.59    9.20
  -8   9   0   61.19    5.90
   8  -9  -1   23.70    3.70
  -8   9   1   21.10    4.10
   8  -9  -2   23.00    4.10
  -8   9   2   19.40    6.80
  -8   9   2   20.00    4.50
   8  -9  -3   26.80    4.50
  -8   9   3   18.60    6.40
  -8   9   3   26.50    5.00
   8  -9  -4   18.60    4.20
  -8   9   4   10.00    4.10
  -8   9   4    8.10    5.30
   8  -9  -5   -3.10    3.20
  -8   9   5    7.20    5.40
  -8   9   5    3.50    3.70
  -7   9 -12    6.70   11.60
  -7   9 -12   -5.20    2.60
  -7   9 -11   79.49    5.70
  -7   9 -11   70.79    7.30
  -7   9 -11   48.60    8.80
  -7   9 -10   19.40    7.00
  -7   9 -10   17.50    3.10
  -7   9  -9   59.19    5.90
  -7   9  -9   49.80    7.90
  -7   9  -9   53.69    6.40
  -7   9  -8    7.30    4.30
  -7   9  -8    6.20    3.10
  -7   9  -8    2.30    5.10
  -7   9  -7   12.50    3.00
  -7   9  -7    6.20    3.60
  -7   9  -7   12.90    5.50
   7  -9   6    8.20    3.00
  -7   9  -6    2.30    5.00
  -7   9  -6    7.70    2.70
   7  -9   5    0.20    3.80
  -7   9  -5    5.50    4.90
  -7   9  -5    2.60    2.40
   7  -9   4    5.70    2.90
  -7   9  -4    2.00    4.90
  -7   9  -4    5.80    2.70
   7  -9   3    6.30    3.10
  -7   9  -3    9.20    5.10
  -7   9  -3   12.20    3.20
   7  -9   2    3.00    2.80
  -7   9  -2    3.60    5.10
  -7   9  -2   -2.20    2.30
   7  -9   1   27.80    4.10
  -7   9  -1   19.50    5.60
  -7   9  -1   20.80    4.00
   7  -9   0    0.60    2.70
  -7   9   0   -0.80    4.30
  -7   9   0    5.30    3.00
   7  -9  -1   54.89    5.90
  -7   9   1   44.40    7.10
  -7   9   1   57.49    6.20
   7  -9  -2   -2.00    3.10
  -7   9   2   -4.10    4.30
  -7   9   2   -0.70    3.10
   7  -9  -3    0.50    3.30
  -7   9   3    1.20    5.00
  -7   9   3   -1.80    3.10
   7  -9  -4    5.80    3.60
  -7   9   4    3.50    3.60
  -7   9   4    5.60    5.10
   7  -9  -5    3.20    3.70
  -7   9   5    6.70    5.00
   7  -9  -6   -1.30    3.70
  -7   9   6    4.70    5.20
   7  -9  -7    4.10    4.30
  -7   9   7    3.00    5.30
   7  -9  -8   23.90    5.70
  -7   9   8   24.40    6.40
  -6   9 -14    2.30    4.30
  -6   9 -14    9.50    6.40
  -6   9 -14    6.40    3.40
  -6   9 -13   76.19    8.20
  -6   9 -13   90.79    7.60
  -6   9 -13   78.79    9.90
  -6   9 -12   -0.90    3.50
  -6   9 -12   -6.10    4.50
  -6   9 -12   -1.30    2.80
  -6   9 -11    2.90    3.10
  -6   9 -11    2.70    5.10
  -6   9 -11    0.60    3.50
  -6   9 -10   95.69    7.90
  -6   9 -10  100.69    8.80
  -6   9 -10  104.69   10.60
  -6   9  -9  150.98    9.60
  -6   9  -9  139.19   12.00
   6  -9   8   72.29    6.80
  -6   9  -8   73.59    6.60
  -6   9  -8   66.59    8.20
   6  -9   7  311.87   15.90
  -6   9  -7  300.27   18.00
  -6   9  -7  318.67   15.80
   6  -9   6   56.29    6.00
  -6   9  -6   58.39    5.80
  -6   9  -6   59.09    8.00
   6  -9   5   30.70    4.60
  -6   9  -5   30.60    4.50
  -6   9  -5   32.50    6.20
   6  -9   4    1.90    3.00
  -6   9  -4   -1.70    3.90
  -6   9  -4    5.30    3.20
   6  -9   3    1.00    2.90
  -6   9  -3    7.10    4.60
  -6   9  -3    0.80    2.90
   6  -9   2   20.50    4.10
  -6   9  -2   22.90    4.20
  -6   9  -2   20.70    5.30
   6  -9   1   14.00    3.60
  -6   9  -1    8.20    3.50
  -6   9  -1   11.50    4.90
   6  -9   0   30.90    4.80
  -6   9   0   23.90    5.50
  -6   9   0   24.60    4.60
   6  -9  -1    4.10    3.40
  -6   9   1    4.80    4.20
   6  -9  -2    7.40    3.80
  -6   9   2   19.90    5.50
  -6   9   2   14.10    4.10
   6  -9  -3   14.90    4.50
  -6   9   3   18.60    5.40
  -6   9   3   16.60    4.60
   6  -9  -4   -1.80    3.60
  -6   9   4   -1.40    4.10
  -6   9   4    3.90    4.40
  -6   9   5    5.20    5.00
   6  -9  -6    9.30    4.50
  -6   9   6   19.90    5.80
   6  -9  -7   19.60    5.40
  -6   9   7   12.50    5.70
   6  -9  -8    3.60    4.70
  -6   9   8    6.20    5.20
   6  -9  -9    7.80    4.90
   6  -9 -10   -3.30    5.00
  -6   9  10    4.40    5.50
  -5   9 -16    2.50    5.30
  -5   9 -16    9.30    5.30
  -5   9 -15   -3.70    4.70
  -5   9 -15    1.00    4.50
  -5   9 -14   -2.50    4.60
  -5   9 -14   10.20    5.10
  -5   9 -13    9.90    4.70
  -5   9 -13   -1.20    3.30
  -5   9 -13    0.30    4.70
  -5   9 -12    4.60    4.10
  -5   9 -12    4.70    4.60
  -5   9 -12    1.90    3.30
  -5   9 -11    0.00    4.50
  -5   9 -11    1.40    3.20
   5  -9  10  116.39    9.40
  -5   9 -10  115.19   10.70
   5  -9   9   92.19    8.30
  -5   9  -9   96.09    8.20
  -5   9  -9   86.59    8.80
   5  -9   8   75.49    7.30
  -5   9  -8   64.49    8.00
  -5   9  -8   66.69    7.10
   5  -9   7    2.80    3.20
  -5   9  -7   -1.30    3.00
   5  -9   6   45.70    5.80
  -5   9  -6   46.10    5.80
  -5   9  -6   50.29    7.80
   5  -9   5    8.10    3.70
  -5   9  -5    1.20    3.60
  -5   9  -5    8.00    3.40
   5  -9   4    0.00    2.80
  -5   9  -4   -3.10    2.90
  -5   9  -4    3.60    4.00
   5  -9   3   10.20    3.50
  -5   9  -3   12.50    3.90
  -5   9  -3    6.40    4.20
   5  -9   2    7.50    3.30
  -5   9  -2    6.80    3.60
  -5   9  -2    3.90    4.20
   5  -9   1   -2.50    2.80
  -5   9  -1   -2.40    3.30
   5  -9   0  144.29   10.20
  -5   9   0  168.88   10.60
  -5   9   0  148.59   10.70
   5  -9  -1   18.00    4.40
  -5   9   1   19.60    4.50
  -5   9   1   17.60    4.80
   5  -9  -2    7.90    3.90
  -5   9   2   10.30    4.20
  -5   9   2   13.00    4.50
   5  -9  -3    6.10    3.70
  -5   9   3    4.80    3.70
  -5   9   3    8.30    4.50
   5  -9  -4   36.90    6.00
  -5   9   4   25.90    5.90
   5  -9  -5   54.19    6.90
  -5   9   5   57.29    7.40
   5  -9  -6   15.70    4.90
  -5   9   6   23.00    5.80
   5  -9  -7    3.50    4.40
  -5   9   7    5.10    5.00
   5  -9  -8   -3.60    4.10
  -5   9   8    4.60    4.80
   5  -9  -9   -2.20    4.50
  -5   9   9   -5.60    4.90
   5  -9 -10    6.20    5.40
  -5   9  10    5.00    5.30
   5  -9 -11   13.10    6.10
  -5   9  11    6.20    5.60
  -4   9 -17  195.48   14.40
  -4   9 -17  204.08   15.50
  -4   9 -16   11.40    5.30
  -4   9 -16    1.50    5.30
  -4   9 -15  207.98   14.20
  -4   9 -15  198.68   15.10
  -4   9 -14   11.30    5.40
  -4   9 -14    9.40    5.10
  -4   9 -13    3.50    4.70
  -4   9 -13    8.60    4.70
  -4   9 -12   10.40    4.50
   4  -9  11   51.19    6.90
  -4   9 -11   65.49    7.50
  -4   9 -11   54.49    7.10
  -4   9 -11   58.49    6.10
   4  -9  10   -2.50    3.50
  -4   9 -10    5.20    3.90
  -4   9 -10   -0.60    2.80
  -4   9 -10   -2.20    3.40
   4  -9   9   -0.60    3.50
  -4   9  -9   -1.40    3.20
  -4   9  -9   -0.10    3.50
  -4   9  -9    2.80    2.90
   4  -9   8   88.09    8.10
  -4   9  -8   81.69    7.70
  -4   9  -8   83.29    8.00
   4  -9   7   12.00    3.70
   4  -9   7   16.10    4.60
  -4   9  -7    9.10    4.00
  -4   9  -7    6.90    3.80
   4  -9   6    2.30    3.60
   4  -9   6    0.80    2.90
  -4   9  -6    0.90    3.20
  -4   9  -6    3.00    3.40
   4  -9   5   66.59    7.10
   4  -9   5   77.29    7.00
  -4   9  -5   67.69    7.00
  -4   9  -5   85.59    8.20
   4  -9   4    2.90    3.30
   4  -9   4    4.60    3.20
  -4   9  -4    4.20    3.40
  -4   9  -4    5.40    3.40
   4  -9   3   96.09    7.50
   4  -9   3   78.49    7.50
  -4   9  -3   73.19    7.00
  -4   9  -3   89.99    8.30
   4  -9   2   19.90    4.40
   4  -9   2   18.40    4.30
  -4   9  -2   27.60    5.20
  -4   9  -2   18.90    4.60
   4  -9   1   28.50    4.80
   4  -9   1   28.60    4.60
  -4   9  -1   24.30    4.70
  -4   9  -1   26.80    4.90
   4  -9   0   27.00    5.00
   4  -9   0   20.40    4.20
  -4   9   0   30.20    5.10
  -4   9   0   20.40    4.50
   4  -9  -1  233.88   13.00
   4  -9  -1  215.18   13.30
  -4   9   1  231.78   13.30
  -4   9   1  216.48   13.50
   4  -9  -2   31.50    5.50
  -4   9   2   40.40    6.70
  -4   9   2   40.90    6.00
   4  -9  -3    4.00    3.90
   4  -9  -4   -0.70    3.60
  -4   9   4    2.20    4.20
   4  -9  -5   22.10    5.50
  -4   9   5   24.90    5.50
   4  -9  -6   11.50    4.80
  -4   9   6   11.00    4.90
   4  -9  -7    2.50    4.50
  -4   9   7    1.20    4.40
   4  -9  -8    8.40    5.10
  -4   9   8   12.40    5.30
   4  -9  -9    3.10    4.80
  -4   9   9   -3.80    4.40
   4  -9 -10   -5.90    4.60
  -4   9  10    0.10    4.80
   4  -9 -11    0.50    5.20
  -4   9  11    2.60    5.10
   4  -9 -12    6.70    5.70
  -4   9  12   -5.20    5.20
  -3   9 -17   12.90    6.60
  -3   9 -17   -2.80    3.90
  -3   9 -16  102.69    9.60
  -3   9 -16  122.09   12.30
  -3   9 -15   12.70    4.70
  -3   9 -15   18.90    6.60
  -3   9 -14    3.80    4.90
  -3   9 -14    3.80    2.80
  -3   9 -14   -2.50    3.40
  -3   9 -13   -2.80    3.20
  -3   9 -13    0.70    2.70
   3  -9  12    0.20    4.00
  -3   9 -12    1.70    3.30
   3  -9  11   13.80    5.80
  -3   9 -11   22.40    3.90
  -3   9 -11   23.10    4.50
   3  -9  10   -4.90    3.50
  -3   9 -10    0.80    2.40
  -3   9 -10   -1.00    3.00
   3  -9   9   73.39    7.60
  -3   9  -9   55.29    5.60
  -3   9  -9   55.99    6.10
   3  -9   8  280.07   15.70
  -3   9  -8  261.07   14.30
  -3   9  -8  285.07   14.00
  -3   9  -8  269.57   15.90
   3  -9   7    4.90    3.70
   3  -9   7    1.80    2.80
  -3   9  -7    5.10    3.80
  -3   9  -7   -0.10    2.90
   3  -9   6  160.98   11.50
   3  -9   6  174.28   10.30
  -3   9  -6  176.28   10.60
  -3   9  -6  198.98   12.20
   3  -9   5   26.10    5.00
   3  -9   5   18.30    3.70
  -3   9  -5   20.30    4.10
  -3   9  -5   23.40    5.00
   3  -9   4   12.60    3.30
   3  -9   4   10.80    4.10
  -3   9  -4   11.10    4.30
  -3   9  -4   15.70    3.80
   3  -9   3   19.10    3.80
   3  -9   3   17.20    4.30
  -3   9  -3   13.70    3.70
  -3   9  -3   10.30    4.30
   3  -9   2    1.40    3.20
   3  -9   2    5.70    2.90
  -3   9  -2   -0.90    2.90
  -3   9  -2    2.20    3.50
   3  -9   1   14.40    3.60
   3  -9   1   11.90    4.30
  -3   9  -1    8.10    4.10
  -3   9  -1   14.10    3.80
   3  -9   0    6.70    4.00
   3  -9   0   16.70    3.70
  -3   9   0   13.40    3.90
  -3   9   0   17.30    5.00
   3  -9  -1   74.59    8.00
   3  -9  -1   75.49    7.40
  -3   9   1   64.39    6.70
   3  -9  -2  112.19    8.30
  -3   9   2  122.79    8.90
   3  -9  -3   39.80    5.10
   3  -9  -3   45.60    6.40
  -3   9   3   39.30    5.60
   3  -9  -4    1.30    3.60
   3  -9  -4   -0.40    3.40
  -3   9   4    4.30    3.80
   3  -9  -5   29.20    5.80
  -3   9   5   28.40    9.00
   3  -9  -6   14.80    5.50
  -3   9   6    8.80    4.50
   3  -9  -7    1.80    4.60
  -3   9   7    6.40    4.60
   3  -9  -8   13.40    5.60
  -3   9   8    9.70    5.20
   3  -9  -9   15.50    5.90
  -3   9   9   15.70    5.70
   3  -9 -10    4.90    5.80
  -3   9  10   -0.40    4.50
   3  -9 -11    0.80    5.20
  -3   9  11    4.80    5.50
   3  -9 -12    2.40    5.50
  -3   9  12    2.80    6.40
  -2   9 -17   -1.80    3.40
  -2   9 -17    8.80    3.10
  -2   9 -17   10.20    6.60
  -2   9 -16    8.10    3.00
  -2   9 -16    0.00    3.40
  -2   9 -16   -1.40    5.80
  -2   9 -15   52.99    9.10
  -2   9 -15   53.49    6.30
  -2   9 -15   56.89    5.60
  -2   9 -14   31.10    4.10
  -2   9 -14   25.80    4.70
   2  -9  13   21.10    6.10
  -2   9 -13   21.50    4.10
  -2   9 -13   27.70    4.00
   2  -9  12   72.89    8.70
  -2   9 -12   93.69    6.50
  -2   9 -12   92.59    7.20
   2  -9  11   33.70    6.50
  -2   9 -11   30.00    4.00
  -2   9 -11   34.30    4.50
   2  -9  10   17.40    5.30
  -2   9 -10   12.90    3.30
  -2   9 -10   17.80    3.20
   2  -9   9   27.20    6.00
  -2   9  -9   26.80    4.10
  -2   9  -9   32.20    3.80
  -2   9  -8  173.98    9.70
  -2   9  -8  168.88    9.20
   2  -9   7   80.09   11.00
  -2   9  -7   91.39    6.60
  -2   9  -7   87.69    6.10
   2  -9   6    7.00    2.70
   2  -9   6    5.60    4.40
  -2   9  -6    9.70    3.00
   2  -9   5   29.30    5.80
   2  -9   5   41.60    4.40
  -2   9  -5   35.40    4.30
   2  -9   4   11.60    2.80
   2  -9   4    6.80    4.20
  -2   9  -4    7.80    2.90
   2  -9   3   22.00    4.90
   2  -9   3   24.90    3.70
  -2   9  -3   26.30    4.00
   2  -9   2   21.40    3.60
   2  -9   2   18.20    4.60
  -2   9  -2   26.20    4.00
   2  -9   1    1.30    2.50
   2  -9   1   -4.00    4.70
  -2   9  -1    0.10    2.70
   2  -9   0    3.70    2.70
   2  -9   0    0.00    4.10
  -2   9   0   -0.70    2.70
   2  -9  -1   16.70    3.50
   2  -9  -1   12.80    4.40
  -2   9   1    9.70    3.60
   2  -9  -2   84.59    6.60
   2  -9  -2   64.39    7.60
  -2   9   2   73.19    7.00
   2  -9  -3   66.09    8.10
   2  -9  -3   69.59    6.40
  -2   9   3   62.39    6.80
   2  -9  -4   56.49    5.90
   2  -9  -4   54.89    7.50
  -2   9   4   60.09    6.70
   2  -9  -5   15.30    5.00
   2  -9  -5    7.10    3.40
  -2   9   5    6.90    4.10
   2  -9  -6    4.80    4.70
  -2   9   6    3.10    6.70
   2  -9  -7    2.40    5.00
  -2   9   7    0.40    4.20
   2  -9  -8   -2.30    4.70
  -2   9   8    0.10    4.30
   2  -9  -9    9.50    5.90
  -2   9   9   10.70    5.10
   2  -9 -10    0.80    5.80
  -2   9  10   10.50    5.50
   2  -9 -11    7.10    7.10
  -2   9  11    8.60    5.60
   2  -9 -12   12.00    6.70
  -2   9  12    3.00    5.40
  -1   9 -17   89.09    7.80
  -1   9 -17   84.79   17.80
  -1   9 -17   65.59    6.60
  -1   9 -16   17.30    3.70
  -1   9 -16    7.70    6.50
  -1   9 -16   18.70    3.20
  -1   9 -15  133.09    8.60
  -1   9 -15  156.68   14.60
  -1   9 -15  138.49    8.10
   1  -9  14   23.80    6.40
  -1   9 -14   33.00    3.80
  -1   9 -14   28.80    3.80
   1  -9  13   73.59    9.50
  -1   9 -13   65.69    7.50
  -1   9 -13   67.89    5.10
   1  -9  12   -2.00    4.60
  -1   9 -12   -0.20    2.20
  -1   9 -12   -1.40    1.90
   1  -9  11   18.80    5.90
  -1   9 -11   20.30    2.80
  -1   9 -11   20.60    3.00
   1  -9  10    6.00    4.70
  -1   9 -10    4.70    2.00
  -1   9 -10    3.50    2.10
   1  -9   9   21.00    5.70
  -1   9  -9   28.00    2.90
  -1   9  -9   26.20    3.00
   1  -9   8    5.00    4.50
  -1   9  -8    0.20    1.70
  -1   9  -8    0.70    1.90
   1  -9   7   79.39    9.00
  -1   9  -7   76.89    5.10
  -1   9  -7   75.39    4.80
   1  -9   6    8.80    4.70
  -1   9  -6    6.60    2.30
  -1   9  -6   11.20    2.10
   1  -9   5  230.98   10.80
   1  -9   5  224.48   14.10
  -1   9  -5  220.88   10.90
   1  -9   4   34.40    3.50
   1  -9   4   33.80    5.90
  -1   9  -4   31.70    3.60
   1  -9   3   75.49    8.10
   1  -9   3   97.99    6.00
  -1   9  -3   84.59    6.10
   1  -9   2   -2.60    3.60
   1  -9   2    0.60    2.20
  -1   9  -2    0.20    2.40
   1  -9   1   10.00    2.70
   1  -9   1   15.80    4.80
  -1   9  -1    7.50    3.00
   1  -9   0   18.00    3.20
   1  -9   0   16.00    5.10
  -1   9   0   14.90    3.50
   1  -9  -1    4.10    4.00
   1  -9  -1    7.70    2.70
  -1   9   1   -0.80    3.00
   1  -9  -2    4.20    4.10
   1  -9  -2    9.40    3.00
  -1   9   2   10.10    3.60
   1  -9  -3    5.90    4.40
   1  -9  -3    1.50    2.60
  -1   9   3    0.00    3.30
   1  -9  -4   10.50    3.40
   1  -9  -4   12.50    5.20
  -1   9   4    5.60    3.90
   1  -9  -5   52.89    7.60
   1  -9  -5   41.90    5.10
  -1   9   5   24.00    5.20
   1  -9  -6   -2.40    4.40
  -1   9   6    2.60    4.20
   1  -9  -7    5.60    4.80
  -1   9   7    1.60    4.20
   1  -9  -8   15.20    6.20
  -1   9   8   15.80    5.60
   1  -9  -9    0.20    5.40
  -1   9   9    7.20    5.30
  -1   9  10   -2.40    5.10
   1  -9 -11   -0.90    5.70
  -1   9  11    1.40    5.30
   0   9 -16   68.49    4.40
   0   9 -16   95.29   12.20
   0   9 -15   -0.90    1.10
   0   9 -15    0.00    1.10
   0   9 -15   -7.70    6.00
   0  -9  14    7.50    6.00
   0  -9  13   -2.90    5.00
   0  -9  12    3.20    5.00
   0  -9  11    2.10    4.90
   0  -9  10   53.89    8.10
   0  -9   9   -3.90    4.40
   0  -9   8    4.50    4.60
   0  -9   7    4.00    4.60
   0  -9   6  399.76   21.70
   0  -9   5   -1.60    4.20
   0  -9   4  290.07   16.60
   0   9  -4  256.97   11.50
   0  -9   3   -3.00    1.40
   0  -9   3   -0.50    4.10
   0   9  -3   -0.10    1.70
   0  -9   2   70.89    4.60
   0  -9   2   64.99    7.90
   0   9  -2   55.49    4.80
   0  -9   1   -1.20    3.80
   0  -9   1   -2.30    1.80
   0   9  -1   -1.40    2.10
   0  -9   0   72.89    8.50
   0  -9   0   86.39    5.60
   0   9   0   69.79    6.10
   0  -9  -1    2.50    2.30
   0  -9  -1    2.00    4.00
   0   9   1   -4.00    2.60
   0  -9  -2    0.10    4.30
   0  -9  -2    2.40    2.40
   0   9   2    2.40    3.00
   0  -9  -3   -2.70    4.00
   0  -9  -3   -1.10    2.40
   0   9   3    4.10    3.20
   0  -9  -4   -2.60    4.00
   0  -9  -4    3.30    2.80
   0   9   4   -1.10    3.30
   0  -9  -5   -2.40    2.60
[truncated: 27,958 more chars]
