# Supplementary material for: Selenium(IV) Polybromide Complexes: Structural Diversity Driven by Halogen and Chalcogen Bonding
Source: Molecules. 2022 Aug 22;27(16):5355. doi: 10.3390/molecules27165355 (PMC9415170; doi:10.3390/molecules27165355)
Supplement: Supplementary file 1 [file molecules-27-05355-s001.zip › 3.cif]

data_3

_audit_creation_method           SHELXL-2017/1
_shelx_SHELXL_version_number     2017/1
_chemical_name_systematic        ?
_chemical_name_common            ?
_chemical_melting_point          ?
_chemical_formula_moiety         ?
_chemical_formula_sum            'C10 H12 Br10 N2 Se'
_chemical_formula_weight         1038.28

loop_
_atom_type_symbol
_atom_type_description
_atom_type_scat_dispersion_real
_atom_type_scat_dispersion_imag
_atom_type_scat_source
C C 0.0033 0.0016 'International Tables Vol C Tables 4.2.6.8 and 6.1.1.4'
H H 0.0000 0.0000 'International Tables Vol C Tables 4.2.6.8 and 6.1.1.4'
N N 0.0061 0.0033 'International Tables Vol C Tables 4.2.6.8 and 6.1.1.4'
Se Se -0.0929 2.2259 'International Tables Vol C Tables 4.2.6.8 and 6.1.1.4'
Br Br -0.2901 2.4595 'International Tables Vol C Tables 4.2.6.8 and 6.1.1.4'

_space_group_crystal_system      tetragonal
_space_group_IT_number           129
_space_group_name_H-M_alt        'P 4/n m m'
_space_group_name_Hall           '-P 4a 2a'

_shelx_space_group_comment       
;
The symmetry employed for this shelxl refinement is uniquely defined
by the following loop, which should always be used as a source of
symmetry information in preference to the above space-group names.
They are only intended as comments.
;

loop_
_space_group_symop_operation_xyz
'x, y, z'
'-x+1/2, -y+1/2, z'
'-y+1/2, x, z'
'y, -x+1/2, z'
'-x, y+1/2, -z'
'x+1/2, -y, -z'
'y+1/2, x+1/2, -z'
'-y, -x, -z'
'-x, -y, -z'
'x-1/2, y-1/2, -z'
'y-1/2, -x, -z'
'-y, x-1/2, -z'
'x, -y-1/2, z'
'-x-1/2, y, z'
'-y-1/2, -x-1/2, z'
'y, x, z'

_cell_length_a                   11.7570(5)
_cell_length_b                   11.7570(5)
_cell_length_c                   8.6464(5)
_cell_angle_alpha                90
_cell_angle_beta                 90
_cell_angle_gamma                90
_cell_volume                     1195.17(12)
_cell_formula_units_Z            2
_cell_measurement_temperature    188(2)
_cell_measurement_reflns_used    7083
_cell_measurement_theta_min      2.4499
_cell_measurement_theta_max      31.2070

_exptl_crystal_description       prism
_exptl_crystal_colour            dark-brown
_exptl_crystal_density_meas      ?
_exptl_crystal_density_method    ?
_exptl_crystal_density_diffrn    2.885
_exptl_crystal_F_000             940
_exptl_transmission_factor_min   ?
_exptl_transmission_factor_max   ?
_exptl_crystal_size_max          0.056
_exptl_crystal_size_mid          0.052
_exptl_crystal_size_min          0.036
_exptl_absorpt_coefficient_mu    18.286
_shelx_estimated_absorpt_T_min   0.427
_shelx_estimated_absorpt_T_max   0.559
_exptl_absorpt_correction_type   multi-scan
_exptl_absorpt_correction_T_min  0.5722
_exptl_absorpt_correction_T_max  0.7462
_exptl_absorpt_process_details   
;
 SADABS 2016/2: Krause, L., Herbst-Irmer, R., Sheldrick G.M. & Stalke D.,
 J. Appl. Cryst. 48 (2015) 3-10
;
_exptl_absorpt_special_details   ?
_diffrn_ambient_temperature      188(2)
_diffrn_radiation_wavelength     0.71073
_diffrn_radiation_type           MoK\a
_diffrn_source                   'Incoatec IuS3.0 microfocus X-ray tube'
_diffrn_measurement_device_type  'Bruker D8 Venture diffractometer'
_diffrn_measurement_method       '\w and \f scans'
_diffrn_detector_area_resol_mean 7.41
_diffrn_reflns_number            16382
_diffrn_reflns_av_unetI/netI     0.0238
_diffrn_reflns_av_R_equivalents  0.0580
_diffrn_reflns_limit_h_min       -17
_diffrn_reflns_limit_h_max       17
_diffrn_reflns_limit_k_min       -17
_diffrn_reflns_limit_k_max       17
_diffrn_reflns_limit_l_min       -12
_diffrn_reflns_limit_l_max       12
_diffrn_reflns_theta_min         2.356
_diffrn_reflns_theta_max         31.497
_diffrn_reflns_theta_full        25.500
_diffrn_measured_fraction_theta_max 0.997
_diffrn_measured_fraction_theta_full 0.997
_diffrn_reflns_Laue_measured_fraction_max 0.997
_diffrn_reflns_Laue_measured_fraction_full 0.997
_diffrn_reflns_point_group_measured_fraction_max 0.997
_diffrn_reflns_point_group_measured_fraction_full 0.997
_reflns_number_total             1154
_reflns_number_gt                955
_reflns_threshold_expression     'I > 2\s(I)'
_reflns_Friedel_coverage         0.000
_reflns_Friedel_fraction_max     .
_reflns_Friedel_fraction_full    .

_reflns_special_details          
;
 Reflections were merged by SHELXL according to the crystal
 class for the calculation of statistics and refinement.
 
 _reflns_Friedel_fraction is defined as the number of unique
 Friedel pairs measured divided by the number that would be
 possible theoretically, ignoring centric projections and
 systematic absences.
;
_computing_data_collection       'APEX3 (Bruker-AXS, 2016)'
_computing_cell_refinement       'SAINT (Bruker-AXS, 2016)'
_computing_data_reduction        'SAINT (Bruker-AXS, 2016)'
_computing_structure_solution    'SHELXT 2014/5 (Sheldrick, 2014)'
_computing_structure_refinement  'SHELXL-2017/1 (Sheldrick, 2017)'
_computing_molecular_graphics    ?
_computing_publication_material  ?
_refine_special_details          ?
_refine_ls_structure_factor_coef Fsqd
_refine_ls_matrix_type           full
_refine_ls_weighting_scheme      calc
_refine_ls_weighting_details     
'w=1/[\s^2^(Fo^2^)+(0.0161P)^2^+0.9359P] where P=(Fo^2^+2Fc^2^)/3'
_atom_sites_solution_primary     ?
_atom_sites_solution_secondary   ?
_atom_sites_solution_hydrogens   difmap
_refine_ls_hydrogen_treatment    refxyz
_refine_ls_extinction_method     none
_refine_ls_extinction_coef       .
_refine_ls_number_reflns         1154
_refine_ls_number_parameters     42
_refine_ls_number_restraints     0
_refine_ls_R_factor_all          0.0325
_refine_ls_R_factor_gt           0.0236
_refine_ls_wR_factor_ref         0.0481
_refine_ls_wR_factor_gt          0.0459
_refine_ls_goodness_of_fit_ref   1.091
_refine_ls_restrained_S_all      1.091
_refine_ls_shift/su_max          0.001
_refine_ls_shift/su_mean         0.000

loop_
_atom_site_label
_atom_site_type_symbol
_atom_site_fract_x
_atom_site_fract_y
_atom_site_fract_z
_atom_site_U_iso_or_equiv
_atom_site_adp_type
_atom_site_occupancy
_atom_site_site_symmetry_order
_atom_site_calc_flag
_atom_site_refinement_flags_posn
_atom_site_refinement_flags_adp
_atom_site_refinement_flags_occupancy
_atom_site_disorder_assembly
_atom_site_disorder_group
C1 C 0.3070(3) 0.6510(3) 0.7269(4) 0.0665(10) Uani 1 1 d . . . . .
H2 H 0.343(3) 0.590(3) 0.728(4) 0.080 Uiso 1 1 d . U . . .
C2 C 0.3646(4) 0.750000 0.7228(8) 0.0802(16) Uani 0.5 2 d S T P . .
H1A H 0.438(5) 0.750000 0.743(6) 0.096 Uiso 0.5 2 d S U P . .
N1 N 0.3646(4) 0.750000 0.7228(8) 0.0802(16) Uani 0.5 2 d S T P . .
H1B H 0.438(5) 0.750000 0.743(6) 0.096 Uiso 0.5 2 d S U P . .
Se1 Se 0.750000 0.750000 0.51616(6) 0.02031(12) Uani 1 8 d S T P . .
Br1 Br 0.750000 0.750000 0.24321(7) 0.03355(16) Uani 1 8 d S T P . .
Br2 Br 0.59616(2) 0.59616(2) 0.52428(4) 0.03147(9) Uani 1 2 d S T P . .
Br3 Br 0.750000 0.750000 0.86875(7) 0.02615(13) Uani 1 8 d S T P . .
Br4 Br 0.93086(2) 0.93086(2) 0.96956(4) 0.04520(11) Uani 1 2 d S T P . .

loop_
_atom_site_aniso_label
_atom_site_aniso_U_11
_atom_site_aniso_U_22
_atom_site_aniso_U_33
_atom_site_aniso_U_23
_atom_site_aniso_U_13
_atom_site_aniso_U_12
C1 0.084(3) 0.0470(19) 0.069(2) -0.0060(17) -0.0169(18) 0.0198(18)
C2 0.053(3) 0.068(3) 0.120(5) 0.000 -0.027(3) 0.000
N1 0.053(3) 0.068(3) 0.120(5) 0.000 -0.027(3) 0.000
Se1 0.01923(16) 0.01923(16) 0.0225(3) 0.000 0.000 0.000
Br1 0.0400(2) 0.0400(2) 0.0207(3) 0.000 0.000 0.000
Br2 0.02536(11) 0.02536(11) 0.04368(19) -0.00071(9) -0.00071(9) -0.00882(11)
Br3 0.02774(19) 0.02774(19) 0.0230(3) 0.000 0.000 0.000
Br4 0.04807(15) 0.04807(15) 0.0394(2) 0.00319(11) 0.00319(11) -0.01132(18)

_geom_special_details            
;
 All esds (except the esd in the dihedral angle between two l.s. planes)
 are estimated using the full covariance matrix.  The cell esds are taken
 into account individually in the estimation of esds in distances, angles
 and torsion angles; correlations between esds in cell parameters are only
 used when they are defined by crystal symmetry.  An approximate (isotropic)
 treatment of cell esds is used for estimating esds involving l.s. planes.
;

loop_
_geom_bond_atom_site_label_1
_geom_bond_atom_site_label_2
_geom_bond_distance
_geom_bond_site_symmetry_2
_geom_bond_publ_flag
C1 C1 1.339(8) 14_655 ?
C1 C2 1.348(5) . ?
C1 H2 0.83(4) . ?
C2 H1A 0.88(6) . ?
C2 H1B 0.88(6) . ?
Se1 Br1 2.3600(9) . ?
Se1 Br2 2.5589(3) 2_665 ?
Se1 Br2 2.5589(3) 4_565 ?
Se1 Br2 2.5589(3) 3_655 ?
Se1 Br2 2.5589(3) . ?
Br4 Br4 2.3588(8) 9_777 ?

loop_
_geom_angle_atom_site_label_1
_geom_angle_atom_site_label_2
_geom_angle_atom_site_label_3
_geom_angle
_geom_angle_site_symmetry_1
_geom_angle_site_symmetry_3
_geom_angle_publ_flag
C1 C1 C2 120.2(2) 14_655 . ?
C1 C1 H2 121(3) 14_655 . ?
C2 C1 H2 119(3) . . ?
C1 C2 C1 119.5(5) 13_575 . ?
C1 C2 H1A 119.2(6) 13_575 . ?
C1 C2 H1A 119.2(6) . . ?
C1 C2 H1B 119.2(6) 13_575 . ?
C1 C2 H1B 119.2(6) . . ?
H1A C2 H1B 0.0 . . ?
Br1 Se1 Br2 91.574(15) . 2_665 ?
Br1 Se1 Br2 91.574(15) . 4_565 ?
Br2 Se1 Br2 89.957(1) 2_665 4_565 ?
Br1 Se1 Br2 91.574(15) . 3_655 ?
Br2 Se1 Br2 89.957(1) 2_665 3_655 ?
Br2 Se1 Br2 176.85(3) 4_565 3_655 ?
Br1 Se1 Br2 91.573(15) . . ?
Br2 Se1 Br2 176.85(3) 2_665 . ?
Br2 Se1 Br2 89.957(1) 4_565 . ?
Br2 Se1 Br2 89.957(1) 3_655 . ?

_refine_diff_density_max         0.639
_refine_diff_density_min         -0.880
_refine_diff_density_rms         0.113

_shelx_res_file                  
;
TITL 1_a.res in P4/nmm
    1_a.res
    created by SHELXL-2017/1 at 15:22:36 on 24-May-2022
REM Old TITL 1 in P4/nmm
REM SHELXT solution in P4/nmm
REM R1 0.118,  Rweak 0.004,  Alpha 0.013,  Orientation as input
REM Formula found by SHELXT:  C12 Br11
CELL  0.71073  11.7570  11.7570   8.6464   90.000   90.000   90.000
ZERR    2.000   0.0005   0.0005   0.0005    0.000    0.000    0.000
LATT  1
SYMM 1/2-X, 1/2-Y, Z
SYMM 1/2-Y, X, Z
SYMM Y, 1/2-X, Z
SYMM -X, 1/2+Y, -Z
SYMM 1/2+X, -Y, -Z
SYMM 1/2+Y, 1/2+X, -Z
SYMM -Y, -X, -Z
SFAC C  H  N SE BR
UNIT 20 24 4 2 20
TEMP -85.150
L.S. 10
BOND $H
LIST 4
FMAP 2
PLAN 20
OMIT 0
OMIT 0 6 0
OMIT 3 3 0
eadp c2 n1
exyz c2 n1
eadp h1a h1b
exyz h1a h1b

ACTA 51
SIZE 0.056 0.052 0.036
WGHT    0.016100    0.935900
FVAR       0.19568
C1    1    0.306956    0.650960    0.726933    11.00000    0.08371    0.04700 =
         0.06877   -0.00603   -0.01694    0.01978
H2    2    0.342749    0.590319    0.728378    11.00000   -1.20000
C2    1    0.364637    0.750000    0.722804    10.25000    0.05273    0.06804 =
         0.11974    0.00000   -0.02651    0.00000
H1A   2    0.437930    0.750000    0.743238    10.25000   -1.20000
N1    3    0.364637    0.750000    0.722804    10.25000    0.05273    0.06804 =
         0.11974    0.00000   -0.02651    0.00000
H1B   2    0.437930    0.750000    0.743238    10.25000   -1.20000
SE1   4    0.750000    0.750000    0.516156    10.12500    0.01923    0.01923 =
         0.02246    0.00000    0.00000    0.00000

BR1   5    0.750000    0.750000    0.243212    10.12500    0.03998    0.03998 =
         0.02070    0.00000    0.00000    0.00000
BR2   5    0.596155    0.596155    0.524280    10.50000    0.02536    0.02536 =
         0.04368   -0.00071   -0.00071   -0.00882
BR3   5    0.750000    0.750000    0.868748    10.12500    0.02774    0.02774 =
         0.02297    0.00000    0.00000    0.00000
BR4   5    0.930856    0.930856    0.969561    10.50000    0.04807    0.04807 =
         0.03944    0.00319    0.00319   -0.01132
HKLF 4


REM  1_a.res in P4/nmm
REM R1 =  0.0236 for     955 Fo > 4sig(Fo)  and  0.0325 for all    1154 data
REM     42 parameters refined using      0 restraints

END

WGHT      0.0154      1.0301

REM Highest difference peak  0.639,  deepest hole -0.880,  1-sigma level  0.113
Q1    1   0.9109  0.9665  1.0347  11.00000  0.05    0.64
Q2    1   0.3951  0.7500  0.7048  10.50000  0.05    0.45
Q3    1   0.2500  0.4843  0.6759  10.50000  0.05    0.43
Q4    1   0.2500  0.5556  0.6325  10.50000  0.05    0.42
Q5    1   0.2500  0.5147  0.8760  10.50000  0.05    0.41
Q6    1   0.4539  0.7500  0.7953  10.50000  0.05    0.41
Q7    1   0.2500  0.5003  0.7819  10.50000  0.05    0.41
Q8    1   0.2500  0.6130  0.6581  10.50000  0.05    0.37
Q9    1   0.4907  0.7500  0.5960  10.50000  0.05    0.36
Q10   1   0.6011  0.6011  0.6662  10.50000  0.05    0.35
Q11   1   0.9040  0.9040  0.9466  10.50000  0.05    0.35
Q12   1   0.2500  0.5318  0.8216  10.50000  0.05    0.35
Q13   1   0.6183  0.6183  0.3422  10.50000  0.05    0.34
Q14   1   0.4619  0.7500  0.6269  10.50000  0.05    0.33
Q15   1   0.4684  0.7500  0.6624  10.50000  0.05    0.33
Q16   1   0.5134  0.7500  0.8581  10.50000  0.05    0.31
Q17   1   0.2937  0.5819  0.8741  11.00000  0.05    0.31
Q18   1   0.4684  0.7500  0.9204  10.50000  0.05    0.31
Q19   1   0.7500  0.7500  0.1888  10.12500  0.05    0.30
Q20   1   0.3187  0.5545  0.8237  11.00000  0.05    0.29
;
_shelx_res_checksum              25559

_shelx_hkl_file                  
;
   0   1   0    0.20    0.10
   0   1   0   -0.20    0.20
  -1   0   0    0.30    0.30
   1  -1   0 1635.64   71.39
  -1   1   0 1785.62   71.79
  -1   2   0   -0.10    0.20
   1  -2   0    0.30    0.70
   1  -2   0    1.80    2.00
   2   1   0    1.60    0.80
  -2  -1   0    0.30    0.70
   1  -2   0    0.00    0.20
   2   1   0    0.10    0.20
  -2  -1   0    0.20    0.20
   0   2   0    1.30    0.30
   2   0   0    1.70    0.30
   0  -2   0    1.50    0.80
   0  -2   0    2.20    0.30
  -2   0   0    2.80    1.00
  -2   0   0    2.10    0.30
   0   2   0    2.10    0.80
   2   0   0    1.90    0.80
  -1  -2   0    0.20    0.30
   2  -1   0    0.40    0.20
  -2   1   0    0.60    0.80
   1   2   0   -0.30    0.60
   1   2   0    0.20    0.20
   2  -1   0    1.30    1.00
   2  -1   0    1.00    0.20
  -1  -2   0    0.30    0.60
   2  -2   0 3400.66  145.29
  -2   2   0 3565.24  146.29
  -2   3   0    5.50    3.20
  -2   3   0    0.70    0.40
  -3  -2   0    0.70    0.40
   3   2   0   -0.90    0.80
   2  -3   0    1.20    2.60
   3   2   0   -0.70    0.40
   2  -3   0    0.40    0.30
  -3  -2   0    1.10    1.20
  -1   3   0   98.79    4.20
   1  -3   0   96.69    6.00
   3   1   0   97.29    5.70
  -1   3   0   89.09    5.80
  -3  -1   0   91.89    4.20
   3   1   0   97.89    4.20
  -3  -1   0   94.19    5.90
   1  -3   0   95.29    4.10
  -3   0   0   -0.20    0.30
   0  -3   0    0.90    0.90
   3   0   0    0.80    0.80
   3   0   0    0.10    0.30
   0  -3   0   -0.30    0.30
   0   3   0   -1.20    0.70
   3  -1   0  100.69    4.20
   1   3   0   84.49    5.60
  -1  -3   0   92.29    5.70
   1   3   0   96.59    4.20
   3  -1   0   99.59    6.30
  -3   1   0   95.49    4.10
  -3   1   0   91.99    6.60
   2   3   0    0.10    0.40
  -2  -3   0    0.30    0.40
   3  -2   0    0.70    0.30
  -3   2   0    0.90    1.80
   3  -2   0    0.40    0.30
   3  -2   0    1.20    1.70
   2   3   0    0.10    0.80
  -2  -3   0    1.20    1.30
   3  -3   0 9085.39  392.26
  -3   3   0 9999.00  394.66
   3  -4   0    0.00    0.40
   3  -4   0   -2.00    2.80
  -3   4   0   -3.20    2.50
  -4  -3   0    0.50    0.60
   4   3   0   -0.70    1.20
   4   3   0    0.50    0.60
  -3   4   0   -0.30    0.40
  -4  -3   0   -0.10    1.30
   2  -4   0 1741.23   69.99
  -4  -2   0 1611.44   66.79
  -4  -2   0 1642.64   69.59
   4   2   0 1575.34   69.09
   2  -4   0 1682.43   75.49
   2  -4   0 1536.55   66.59
   4   2   0 1693.83   66.79
   1  -4   0   -0.40    1.20
   4   1   0    0.30    0.40
  -4  -1   0    0.50    1.20
   1  -4   0   -0.30    0.40
  -1   4   0    0.40    0.40
   4   1   0    0.20    1.10
  -4  -1   0    1.00    0.50
  -1   4   0    0.70    1.20
   0   4   0  144.59    8.30
   4   0   0  148.09    8.30
   0   4   0  144.49    6.10
  -4   0   0  143.59    6.00
   0  -4   0  131.19    8.10
   0  -4   0  130.39    6.00
   4   0   0  141.79    6.10
  -4   0   0  126.19    8.30
   1   4   0    1.00    0.40
  -1  -4   0    0.20    0.40
   4  -1   0    0.50    1.00
  -4   1   0   -0.40    1.50
  -1  -4   0   -0.40    0.90
   1   4   0   -0.80    1.00
  -4   1   0    0.90    0.40
   4  -2   0 1597.14   65.99
  -2  -4   0 1621.44   68.79
   4  -2   0 1559.24   69.79
  -2  -4   0 1573.64   66.09
  -4   2   0 1661.63   71.39
   2   4   0 1730.83   68.89
   4  -2   0 1609.84   65.99
   4  -3   0   -0.10    0.40
   3   4   0    0.60    0.60
  -3  -4   0    1.00    0.60
  -4   3   0    0.20    1.90
   4  -3   0    0.80    0.40
  -3  -4   0   -0.30    1.40
   4  -3   0    0.30    2.40
   3   4   0    0.60    1.10
  -4   3   0   -0.30    0.40
   4  -4   0 1564.14   71.99
   4   4   0 1655.73   68.29
  -4   4   0 1592.44   75.09
  -4   4   0 1566.84   64.69
   4  -4   0 1535.55   64.59
  -4  -4   0 1611.14   64.89
  -4  -4   0 1662.93   68.59
   4   4   0 1518.95   64.89
  -5  -4   0   -1.30    1.50
  -5  -4   0    0.00    0.70
  -4   5   0   -1.40    3.10
  -4   5   0    0.50    0.60
   4  -5   0    0.90    0.50
   5   4   0   -0.20    0.70
   4  -5   0    1.80    3.00
   3  -5   0    5.00    2.50
   3  -5   0   -0.60    3.30
   5   3   0    1.30    1.60
   5   3   0    1.00    0.80
   3  -5   0    1.30    0.50
  -5  -3   0    3.20    0.80
  -3   5   0    0.90    0.60
  -5  -3   0    1.70    1.70
  -5  -2   0    0.80    1.80
   2  -5   0   -1.60    1.40
   2  -5   0    0.80    3.10
   2  -5   0    0.30    0.50
   5   2   0   -1.30    1.20
  -5  -2   0   -0.20    0.50
  -2   5   0   -0.20    0.50
   5   2   0    0.40    0.60
   1  -5   0 2321.77   95.29
   5   1   0 2196.48   94.59
   5   1   0 2317.77   91.89
  -5  -1   0 2252.07   91.89
  -5  -1   0 2227.38   95.29
  -1   5   0 2231.58   95.19
   1  -5   0 2242.18   91.79
   0  -5   0    0.30    1.50
   0   5   0    0.50    0.50
   5   0   0    0.10    0.50
  -5   0   0    0.70    1.50
   5   0   0    1.10    1.30
   0  -5   0    0.40    0.50
  -5   0   0    0.30    0.40
   0   5   0   -0.20    1.40
  -5   1   0 2332.17   95.49
  -1  -5   0 2306.17   90.89
   5  -1   0 2245.38   90.79
  -1  -5   0 2238.68   93.89
  -5   1   0 2120.49   90.69
   5  -1   0 2104.39   94.09
   1   5   0 2274.97   94.09
  -5   2   0   -1.90    2.20
   5  -2   0    0.10    0.50
  -2  -5   0   -1.20    1.30
  -2  -5   0   -0.40    0.50
   5  -2   0    3.00    1.80
   5  -2   0    0.40    0.40
   2   5   0   -0.10    0.60
   2   5   0   -0.40    1.50
   5  -3   0    1.80    0.60
   5  -3   0    1.90    2.50
   3   5   0    1.70    0.80
   3   5   0   -0.90    1.20
  -3  -5   0    1.90    0.70
   5  -3   0    0.80    0.50
  -3  -5   0    3.10    2.30
  -5   3   0    1.20    2.80
  -4  -5   0    1.80    1.90
   4   5   0   -0.70    1.80
   4   5   0    1.00    0.80
   5  -4   0    0.20    0.40
   5  -4   0    3.90    3.10
   5  -4   0   -0.30    0.60
  -5   4   0    1.50    4.00
   5  -5   0 1589.94   63.69
  -5   5   0 1527.55   76.59
  -5  -5   0 1564.44   63.99
   5   5   0 1557.24   63.99
   5   5   0 1489.35   67.79
   5  -5   0 1644.34   72.99
  -5   5   0 1571.44   63.79
  -5  -5   0 1531.05   68.39
  -6  -5   0   -1.00    0.70
   5  -6   0    0.30    0.60
  -5   6   0   -1.00    4.40
   6   5   0   -0.80    0.90
  -6  -5   0   -2.70    1.70
  -5   6   0   -0.20    0.70
   5  -6   0   -4.40    3.60
   5  -6   0    1.50    2.60
   6   4   0    6.90    1.30
  -6  -4   0    6.60    1.10
   4  -6   0    5.50    2.70
   4  -6   0    6.60    0.90
   6   4   0    5.60    2.40
   4  -6   0    7.90    4.70
  -4   6   0   10.00    1.20
  -6  -4   0    9.30    3.50
   3  -6   0    6.10    4.30
   6   3   0    1.10    0.80
   3  -6   0   -0.20    0.50
  -6  -3   0    0.00    0.70
   3  -6   0    1.40    2.20
  -3   6   0    0.10    0.60
   6   3   0   -1.50    1.60
  -6  -3   0    2.00    2.00
   2  -6   0   36.60    5.40
   2  -6   0   30.20    7.40
  -6  -2   0   32.80    4.70
  -2   6   0   32.60    2.00
   6   2   0   27.60    4.20
  -6  -2   0   29.10    2.00
   2  -6   0   32.50    1.90
   6   2   0   28.80    2.10
   6   1   0    1.70    1.80
   1  -6   0    0.10    0.50
  -6  -1   0   -0.40    0.50
   1  -6   0    0.60    2.10
  -1   6   0   -0.80    0.60
  -6  -1   0    1.30    2.20
   6   1   0   -0.70    0.60
  -1   6   0    0.20    1.60
   6   0   0 5601.44  236.18
   0   6   0 5839.32  236.78
   0  -6   0 5669.93  236.38
  -6   0   0 5825.22  237.58
   6  -1   0    0.40    1.90
  -6   1   0    0.30    2.20
   1   6   0    0.10    0.60
   1   6   0   -0.40    1.70
  -6   1   0   -0.10    0.40
  -1  -6   0   -1.70    1.30
  -1  -6   0   -0.20    0.50
   6  -1   0    0.10    0.60
  -2  -6   0   27.60    4.60
   6  -2   0   32.40    2.00
  -6   2   0   41.80    6.70
   2   6   0   31.00    2.10
   6  -2   0   31.30    1.90
   6  -2   0   35.20    5.20
   2   6   0   42.00    7.20
   6  -3   0   -0.20    0.50
   3   6   0   -0.10    0.70
  -3  -6   0    0.00    0.60
  -6   3   0   -0.50    2.70
   6  -3   0   -2.30    2.50
   6  -3   0    0.00    0.60
   3   6   0    0.70    1.80
  -3  -6   0    1.70    1.80
   6  -4   0    2.10    2.90
  -6   4   0    2.20    3.90
   6  -4   0    5.40    1.00
   6  -4   0    7.10    0.90
   4   6   0    6.70    2.60
   4   6   0    6.80    1.20
  -4  -6   0    5.00    2.90
  -5  -6   0    2.20    2.20
   6  -5   0    0.60    0.70
   6  -5   0    0.70    3.50
  -6   5   0    0.60    5.70
   6  -5   0   -0.40    0.60
   5   6   0    1.20    1.00
   6   6   0 2990.70  117.59
   6  -6   0 2839.62  117.09
  -6   6   0 2920.71  117.39
  -6   6   0 2809.72  133.59
  -6  -6   0 2793.92  125.79
   7   6   0   -0.90    1.20
  -7  -6   0   -1.40    2.80
  -6   7   0   -0.40    0.90
   6  -7   0    0.70    0.80
   7   5   0  447.96   19.50
   5  -7   0  460.15   25.00
   5  -7   0  446.86   19.10
  -5   7   0  467.55   19.30
   4  -7   0    1.40    4.80
  -7  -4   0    1.50    2.20
   4  -7   0   -1.10    0.70
  -7  -4   0    1.90    0.90
   7   4   0   -0.20    1.00
   4  -7   0    0.80    2.70
  -4   7   0   -1.30    0.70
   3  -7   0    4.30    5.00
  -3   7   0    0.40    0.80
  -7  -3   0    1.90    0.90
   7   3   0    3.30    2.20
  -7  -3   0   -1.10    2.20
   7   3   0    2.60    1.00
   3  -7   0    3.50    2.80
  -7  -2   0   -3.60    1.80
  -7  -2   0   -1.00    0.60
  -2   7   0    0.50    0.70
   7   2   0    0.10    0.80
   2  -7   0    5.40    5.50
   2  -7   0    0.10    2.40
   7   2   0    4.10    2.30
  -1   7   0 1345.87   59.79
   7   1   0 1353.16   55.19
   1  -7   0 1350.46   55.09
  -1   7   0 1331.97   55.09
   7   1   0 1332.87   58.99
   1  -7   0 1322.57   59.69
  -7  -1   0 1370.46   60.49
  -7  -1   0 1341.07   55.09
   0  -7   0    0.60    0.70
  -7   0   0   -0.10    0.60
  -7   0   0   -1.70    1.90
   0   7   0    0.70    1.90
   0   7   0    1.10    0.80
   0  -7   0   -1.60    1.60
   7   0   0   -2.30    1.40
   7   0   0    0.60    0.70
  -1  -7   0 1454.25   60.89
   1   7   0 1390.46   56.39
  -7   1   0 1295.37   62.19
   7  -1   0 1375.36   60.89
  -1  -7   0 1394.06   56.39
  -7   1   0 1369.96   56.19
   7  -1   0 1341.47   56.29
   1   7   0 1360.86   60.79
   7  -2   0   -0.50    0.60
  -7   2   0    2.30    2.90
   7  -2   0    0.80    0.70
  -2  -7   0    1.50    2.10
  -2  -7   0   -0.40    0.80
   2   7   0    0.60    1.70
   2   7   0   -0.20    0.80
   7  -2   0   -1.00    2.00
   3   7   0    0.80    0.90
  -3  -7   0    1.60    2.40
  -7   3   0    2.30    3.40
   3   7   0    3.80    2.40
   7  -3   0    0.50    0.60
   7  -3   0    0.40    0.80
   7  -3   0    0.90    2.90
  -3  -7   0    0.50    0.80
   7  -4   0    0.00    0.60
   7  -4   0   -3.30    2.60
  -4  -7   0   -2.10    1.90
  -7   4   0   -1.70    3.60
   4   7   0   -0.40    0.90
   7  -4   0    1.00    0.80
  -5  -7   0  422.66   25.70
   7  -5   0  458.65   18.90
  -7   5   0  453.05   31.20
   7  -5   0  437.86   18.60
  -6  -7   0    2.40    3.10
   7  -6   0    0.10    1.00
   6   7   0    1.20    1.20
   7  -7   0  820.02   34.30
   7  -7   0  825.02   34.70
  -7  -7   0  870.01   41.40
  -7   7   0  763.12   50.29
   7   7   0  842.52   34.90
  -7   8   0    1.10    1.20
   7  -8   0   -3.40    3.30
  -8  -7   0   -0.30    3.60
   8   7   0    1.00    1.40
   8   6   0   53.29    3.70
   6  -8   0   55.79    8.50
  -6   8   0   57.09    3.40
  -8  -6   0   47.20    7.90
   6  -8   0   50.99    3.10
  -8  -5   0   -1.50    2.90
   8   5   0   -0.50    1.10
   5  -8   0   -0.50    0.80
  -5   8   0   -0.40    0.90
   5  -8   0    4.00    3.50
  -4   8   0  488.35   20.60
  -8  -4   0  496.05   26.70
   8   4   0  485.95   20.80
   4  -8   0  481.95   27.40
   4  -8   0  484.95   20.50
   3  -8   0    0.60    2.50
  -3   8   0    0.30    0.80
  -8  -3   0    2.30    2.50
  -8  -3   0    0.90    0.90
   8   3   0    0.30    1.00
   3  -8   0   -0.20    0.80
  -8  -2   0 1001.30   40.60
   2  -8   0 1008.30   46.20
  -8  -2   0 1014.60   46.80
   8   2   0  998.30   40.70
  -2   8   0  943.21   40.50
   2  -8   0  938.61   40.50
  -1   8   0    0.10    0.80
  -8  -1   0    1.10    2.20
   1  -8   0   -1.60    2.30
   8   1   0   -0.80    0.80
   1  -8   0   -0.70    0.70
  -8   0   0   10.00    1.20
   0  -8   0    8.80    3.10
  -8   0   0    9.30    3.90
   8   0   0   13.40    1.50
   0  -8   0   10.40    1.40
   0   8   0   12.40    1.50
   8   0   0   11.90    3.30
   1   8   0    1.40    0.90
   8  -1   0   -1.00    2.10
  -1  -8   0   -1.10    2.10
  -8   1   0    0.00    2.50
   8  -1   0    1.30    0.90
  -8   1   0    0.30    0.70
  -8   2   0  963.10   39.00
  -2  -8   0 1019.60   44.70
   8  -2   0  947.31   39.10
   2   8   0  934.71   39.20
  -8   2   0  951.50   47.50
   8  -2   0  928.21   39.20
   8  -2   0  881.71   46.40
   8  -3   0    0.20    0.80
   8  -3   0    0.20    0.60
  -8   3   0   -1.20    3.50
  -4  -8   0  523.75   26.40
  -8   4   0  460.15   30.80
   8  -4   0  464.15   20.20
   4   8   0  505.25   20.70
   8  -4   0  467.95   20.50
  -5  -8   0    0.60    3.00
  -8   5   0    1.10    4.80
   8  -5   0    0.30    1.00
   8  -5   0   -0.10    0.70
   5   8   0   -0.60    1.00
   8  -6   0   54.49    3.00
  -6  -8   0   49.99    7.60
  -8   6   0   65.19   14.60
   8  -6   0   52.69    3.40
   6   8   0   53.39    3.70
   7   8   0    0.30    1.30
  -7  -8   0   -1.40    3.20
  -8   7   0   -5.90    6.50
   8  -7   0   -1.70    0.70
   8  -7   0    1.80    1.20
   8   8   0  501.55   21.00
   8  -8   0  475.75   28.30
  -8  -8   0  516.45   28.30
   8  -8   0  445.46   20.70
   8  -9   0    1.80    3.70
  -9  -8   0    0.20    3.60
   8  -9   0   -0.20    1.30
   9   8   0    1.10    1.70
  -7   9   0    5.60    1.90
  -9  -7   0   10.20    4.80
   9   7   0    3.90    1.80
   7  -9   0    1.20    4.60
  -9  -6   0    0.80    3.70
   9   6   0    0.50    1.40
  -6   9   0   -0.70    1.20
   6  -9   0   -1.40    3.20
   9   5   0   17.60    2.30
  -9  -5   0   15.40    5.50
   5  -9   0   21.30    6.20
  -5   9   0   19.80    2.10
  -9  -4   0    2.60    2.80
   9   4   0   -1.00    1.20
  -4   9   0   -2.10    0.90
   4  -9   0    1.70    3.00
   9   3   0 1945.91   77.29
  -9  -3   0 1884.71   84.49
   3  -9   0 1903.01   83.79
  -3   9   0 1794.72   76.99
  -2   9   0    0.20    0.90
  -9  -2   0    0.80    0.90
   9   2   0   -0.20    1.00
   2  -9   0    0.00    2.40
  -9  -2   0   -3.30    2.90
   9   1   0    0.70    1.10
  -1   9   0    1.30    1.00
   1  -9   0   -1.30    3.00
  -9  -1   0   -0.20    2.70
  -9  -1   0    0.80    0.80
   0  -9   0    1.80    3.00
   9   0   0    0.50    0.90
  -9   0   0   -0.50    0.70
  -9   1   0    0.60    2.80
  -9   1   0   -1.00    0.70
   1   9   0    0.30    1.10
   9  -1   0   -0.40    0.90
  -1  -9   0    1.80    2.60
   9  -2   0   -0.10    1.00
  -2  -9   0   -1.10    2.50
   2   9   0    0.00    1.10
   9  -2   0    0.00    0.80
   9  -3   0 1896.51   75.09
   3   9   0 1894.71   75.19
  -9   3   0 1689.93   85.59
  -3  -9   0 1784.62   81.19
   9  -4   0    1.20    1.10
   9  -4   0    0.20    0.80
   4   9   0    0.60    1.20
  -9   4   0    1.80    4.60
  -4  -9   0   -2.70    3.20
   5   9   0   13.80    2.00
  -5  -9   0   10.80    4.70
  -9   5   0    9.20    7.10
   9  -5   0   16.80    2.00
   9  -5   0   17.30    1.60
   9  -6   0    1.00    1.20
  -9   6   0   -1.90    6.00
   6   9   0    1.20    1.40
   9  -6   0   -0.10    0.90
  -6  -9   0    0.00    3.40
  -7  -9   0    1.60    3.90
   9  -7   0    2.60    1.50
   7   9   0    2.80    1.60
  -9   7   0   10.50    8.60
   9  -8   0    5.50    4.20
   8   9   0    1.20    1.60
  -8  -9   0    1.30    4.70
  -9   8   0   -6.40    7.20
  -9  -9   0  394.66   26.60
   9   9   0  448.16   19.60
   9  -9   0  472.75   28.00
   9  -9   0  437.16   19.30
  10   9   0    3.10    2.10
   9 -10   0    0.70    1.50
   9 -10   0    1.40    5.50
   8 -10   0   38.80    8.90
  -8  10   0   41.00    3.30
   8 -10   0   39.20    3.40
 -10  -8   0   40.90    9.00
  10   8   0   31.50    3.30
  -7  10   0   -1.00    1.30
   7 -10   0    1.60    4.00
 -10  -7   0   -5.80    3.60
  10   7   0   -1.00    1.50
   6 -10   0    3.90    4.60
  -6  10   0    2.30    1.40
 -10  -6   0   -3.60    3.60
  10   6   0    4.10    1.80
   5 -10   0    5.10    4.50
 -10  -5   0    8.50    5.00
  10   5   0    1.70    1.60
  -5  10   0   -0.60    1.10
  10   4   0  712.33   30.00
 -10  -4   0  742.23   38.30
  -4  10   0  688.73   29.70
   4 -10   0  695.23   36.80
  10   3   0    0.20    1.20
  -3  10   0   -1.00    1.10
 -10  -3   0   -2.50    3.50
   3 -10   0   -1.00    3.30
 -10  -2   0  470.35   27.20
   2 -10   0  449.86   25.70
  -2  10   0  453.75   19.50
  10   2   0  450.45   19.70
   1 -10   0    6.00    3.60
  10   1   0    0.70    1.30
  -1  10   0    0.50    1.10
 -10  -1   0    2.00    3.60
 -10   0   0    4.00    4.20
  10   0   0    3.70    1.30
 -10   0   0    2.10    1.00
   0  10   0   10.10    1.50
   0 -10   0    2.90    3.30
  -1 -10   0   -0.40    3.10
 -10   1   0    2.80    4.50
  10  -1   0   -0.10    1.10
 -10   1   0   -0.30    0.80
   1  10   0    0.10    1.20
  -2 -10   0  453.25   25.60
 -10   2   0  435.46   28.50
  10  -2   0  451.25   19.20
  10  -2   0  436.16   19.10
   2  10   0  453.55   19.30
   3  10   0   -0.60    1.20
  10  -3   0    0.90    0.90
  10  -3   0   -0.70    1.00
 -10   3   0   -1.10    3.50
  -3 -10   0    1.90    3.60
   4  10   0  674.73   29.10
  -4 -10   0  684.33   35.70
 -10   4   0  724.73   42.60
  10  -4   0  679.63   28.90
  10  -4   0  685.53   28.60
  10  -5   0    1.10    1.20
   5  10   0    0.90    1.50
  10  -5   0   -0.90    0.80
 -10   5   0    0.60    6.50
  -5 -10   0    2.20    4.30
  -6 -10   0   -3.00    3.60
  10  -6   0    6.30    1.60
   6  10   0    2.10    1.70
 -10   6   0    1.20    7.20
  -7 -10   0   -7.30    3.30
 -10   7   0    5.70    8.60
  10  -7   0    0.10    1.40
   7  10   0   -0.70    1.50
  -8 -10   0   47.10    8.90
 -10   8   0   30.40   12.40
  10  -8   0   42.60    3.60
   8  10   0   41.90    3.90
  -9 -10   0    0.50    7.50
  10  -9   0    3.20    5.30
  10  -9   0    0.80    1.70
   9  10   0    2.60    2.00
  10 -10   0  316.57   15.00
 -10 -10   0  336.37   24.20
  10  10   0  340.37   15.40
 -11 -10   0   -3.00    5.00
  10 -11   0    0.90    6.10
  11  10   0   -0.80    2.10
  10 -11   0   -1.30    1.60
   9 -11   0   76.79   14.50
  11   9   0   84.09    5.80
 -11  -9   0   89.59   13.90
   9 -11   0   77.89    5.30
  -8  11   0   -0.10    1.60
   8 -11   0    5.20    5.80
  11   8   0    2.70    1.90
 -11  -8   0    1.10    5.30
  11   7   0   40.40    3.70
 -11  -7   0   41.30    9.20
  -7  11   0   35.70    3.40
   7 -11   0   24.90    8.20
  -6  11   0   -1.30    1.40
   6 -11   0    3.60    3.80
  11   6   0    0.20    1.60
 -11  -6   0    2.30    4.10
  -5  11   0  300.37   14.10
  11   5   0  326.07   14.50
 -11  -5   0  313.07   22.10
   5 -11   0  334.07   21.70
 -11  -4   0    6.00    4.00
  -4  11   0    0.80    1.30
   4 -11   0   -0.30    3.80
  11   4   0    0.90    1.50
   3 -11   0   49.40    8.90
  -3  11   0   58.39    3.70
 -11  -3   0   61.69   10.60
  11   3   0   53.99    3.90
  11   2   0   -0.60    1.30
 -11  -2   0    2.60    4.10
  -2  11   0    0.20    1.30
   2 -11   0    0.10    3.70
  11   1   0  220.78   10.00
  -1  11   0  203.18    9.70
   1 -11   0  201.38   15.70
 -11  -1   0  204.78   17.20
 -11   0   0   -2.30    4.60
  11   0   0   -0.10    1.30
   0 -11   0    3.30    3.80
   0  11   0    0.20    1.20
   1  11   0  212.28    9.70
 -11   1   0  178.08   17.50
  -1 -11   0  192.98   15.40
  11  -1   0  211.48    9.70
   2  11   0    0.40    1.40
  11  -2   0   -0.10    1.30
  -2 -11   0   -0.80    3.50
 -11   2   0    6.10    5.70
  -3 -11   0   52.29    8.70
   3  11   0   61.89    4.10
  11  -3   0   55.89    3.70
 -11   3   0   50.29   11.10
 -11   4   0    1.10    5.70
  -4 -11   0    0.50    3.70
   4  11   0    0.00    1.50
  11  -4   0    0.10    1.30
 -11   5   0  255.37   25.20
   5  11   0  303.87   13.60
  -5 -11   0  295.57   20.50
  11  -5   0  297.47   13.30
  11  -6   0   -0.20    1.70
  -6 -11   0   -7.60    3.70
   6  11   0    0.00    1.50
 -11   6   0    1.10    6.50
   7  11   0   33.20    3.30
  -7 -11   0   27.80    8.30
  11  -7   0   37.00    3.30
 -11   7   0   27.10   11.20
  11  -8   0    0.80    1.50
 -11   8   0  -13.00    9.00
   8  11   0    1.50    2.00
  -8 -11   0    3.20    5.10
   9  11   0   87.59    5.70
  -9 -11   0   71.19   11.90
  11  -9   0   79.29    5.20
  11 -10   0    3.00    5.90
 -10 -11   0   -2.00    5.10
  11 -10   0    0.80    1.60
  10  11   0   -2.00    1.90
  11 -11   0  107.89   15.20
 -11 -11   0  113.39   16.10
  11  11   0  118.69    7.10
  11 -11   0   97.99    6.40
  12  11   0    1.10    2.40
 -12 -11   0   -5.20    6.00
  11 -12   0    0.60    2.00
  11 -12   0    7.90    6.40
 -12 -10   0   19.50    8.60
  10 -12   0   17.70    7.80
  10 -12   0    6.20    2.10
  12  10   0    4.40    2.40
   9 -12   0   -0.40    1.70
 -12  -9   0    1.80    6.60
  12   9   0    1.10    2.20
   9 -12   0    7.70    6.30
   8 -12   0   52.09   10.60
  12   8   0   57.59    4.70
 -12  -8   0   58.59   12.10
  -8  12   0   52.19    4.20
  -7  12   0    0.80    1.60
   7 -12   0    6.50    5.60
 -12  -7   0   -3.30    4.50
  12   7   0    2.10    2.00
 -12  -6   0  266.67   22.20
  12   6   0  291.87   13.80
  -6  12   0  304.67   13.60
   6 -12   0  301.87   21.80
  12   5   0    0.40    1.70
  -5  12   0    0.60    1.50
   5 -12   0    2.30    3.80
 -12  -5   0    0.10    5.00
  12   4   0    8.30    2.00
 -12  -4   0    5.70    6.00
   4 -12   0    8.00    5.70
  -4  12   0   14.80    2.20
 -12  -3   0    1.80    4.40
  12   3   0   -0.40    1.40
  -3  12   0    1.30    1.50
   3 -12   0    0.60    4.70
  -2  12   0   28.90    2.80
 -12  -2   0   30.30    8.20
   2 -12   0   30.10    7.90
  12   2   0   26.70    2.90
   1 -12   0    3.00    3.90
  -1  12   0    1.70    1.50
 -12  -1   0   -5.20    4.10
  12   1   0    0.00    1.40
   0 -12   0  697.93   37.60
  12   0   0  730.33   30.30
 -12   0   0  706.13   40.90
   0  12   0  702.33   30.20
  -1 -12   0   -1.50    4.20
  12  -1   0    2.80    1.50
   1  12   0    1.30    1.50
 -12   1   0   -6.10    4.50
 -12   2   0   20.00    7.70
  -2 -12   0   26.80    7.20
  12  -2   0   23.30    2.60
   2  12   0   26.50    2.80
  -3 -12   0   -0.80    4.10
 -12   3   0    5.30    5.60
  12  -3   0    0.80    1.60
   3  12   0    4.50    1.80
  12  -4   0    9.70    1.90
  -4 -12   0   13.60    6.50
 -12   4   0   12.00    8.30
   4  12   0   16.20    2.50
   5  12   0   -2.50    1.80
  -5 -12   0   -1.80    4.30
  12  -5   0    0.50    1.40
 -12   5   0    7.60    7.80
  -6 -12   0  269.17   27.40
 -12   6   0  240.38   30.30
  12  -6   0  284.37   12.80
  -7 -12   0   -0.70    4.00
  12  -7   0   -0.90    1.50
 -12   7   0   -2.50   11.00
   7  12   0    2.30    2.00
   8  12   0   57.89    4.70
  12  -8   0   55.19    4.10
 -12   8   0   35.70   14.40
  -8 -12   0   42.50    9.60
  -9 -12   0    8.70    6.20
   9  12   0   -0.70    2.00
 -12   9   0   -3.40    9.80
  12  -9   0   -1.90    1.60
  12  -9   0   -1.20    5.50
  10  12   0    4.50    2.40
  12 -10   0    5.80    5.70
 -10 -12   0    9.90    7.40
  12 -10   0    1.30    1.90
  11  12   0    4.80    2.60
  12 -11   0    1.50    1.80
  12 -11   0   -2.60    6.00
 -11 -12   0    0.30    6.70
  12 -12   0   32.50    9.90
  12 -12   0   22.10    3.10
  12  12   0   24.50    4.20
 -12 -12   0   45.50   10.50
  13  11   0    2.10    2.70
  11 -13   0   -3.00    6.40
  11 -13   0    1.60    2.10
 -13 -11   0   -8.40    6.50
  10 -13   0    3.60    6.50
  10 -13   0   -3.80    1.80
 -13 -10   0  -10.90    5.20
  13  10   0    0.60    2.50
 -13  -9   0   14.80    7.70
  13   9   0    7.10    2.60
   9 -13   0   -2.10    5.60
   9 -13   0   -1.80    2.00
  13   8   0    2.80    2.10
  -8  13   0    0.80    1.70
   8 -13   0    1.90    6.00
 -13  -8   0    2.30    6.60
  -7  13   0  291.97   13.50
  13   7   0  296.07   13.90
 -13  -7   0  270.77   23.90
   7 -13   0  269.27   21.90
  13   6   0   -1.40    1.90
 -13  -6   0   -5.80    6.10
  -6  13   0   -0.60    1.70
   6 -13   0   -1.70    5.30
  -5  13   0   55.79    4.30
  13   5   0   64.69    4.60
 -13  -5   0   44.60   10.80
  13   4   0    0.10    1.90
   4 -13   0   -5.40    4.00
 -13  -4   0   -3.80    4.90
  -4  13   0    0.50    1.60
 -13  -3   0   -3.60    5.60
   3 -13   0   -0.80    4.90
  13   3   0   -1.00    1.50
  -3  13   0    0.80    1.70
 -13  -2   0  -12.10    5.00
   2 -13   0   -5.50    4.10
  -2  13   0   -2.30    1.40
  13   2   0   -0.10    1.60
  13   1   0  270.07   12.70
   1 -13   0  265.97   19.90
 -13  -1   0  289.57   23.10
  -1  13   0  267.67   12.60
   0 -13   0    0.40    4.80
 -13   0   0   -9.00    5.10
  13   0   0    0.00    1.70
   0  13   0    1.00    1.70
  -1 -13   0  288.27   20.30
   1  13   0  258.87   12.20
  13  -1   0  259.57   12.10
 -13   1   0  223.38   22.00
  -2 -13   0    0.50    5.10
   2  13   0    0.10    1.80
  13  -2   0    1.00    1.60
 -13   2   0   -2.20    6.00
  13  -3   0    0.20    1.60
 -13   3   0   12.00    7.50
  -3 -13   0    7.00    6.30
   3  13   0    1.90    1.70
 -13   4   0   -0.80    8.00
  13  -4   0    1.60    1.60
  -4 -13   0   -2.60    4.80
   4  13   0   -0.80    1.80
 -13   5   0   74.29   17.10
   5  13   0   68.59    4.80
  13  -5   0   55.79    4.20
  -5 -13   0   71.49   14.50
  -6 -13   0   -4.50    4.90
   6  13   0    1.10    2.20
  13  -6   0   -1.80    1.40
 -13   7   0  221.08   31.20
   7  13   0  259.77   12.90
  13  -7   0  261.17   12.40
  -7 -13   0  314.87   22.80
 -13   8   0  -11.50   12.70
   8  13   0    2.30    2.40
  13  -8   0    0.80    1.70
  -8 -13   0   -2.40    5.30
 -13   9   0   -4.40   14.40
   9  13   0    2.30    2.50
  -9 -13   0   -0.70    6.50
  13  -9   0    1.60    1.80
  13  -9   0   -3.10    5.80
  13 -10   0   -3.00    1.70
  10  13   0    2.30    2.50
 -10 -13   0   -5.30    6.70
  13 -10   0    8.50    7.00
  13 -11   0    6.30    7.40
  13 -11   0    1.60    2.00
  11  13   0    4.30    3.40
 -11 -13   0    1.20    7.10
  10 -14   0  -15.40    6.60
 -14 -10   0   -9.90    6.60
  14  10   0    1.40    2.50
  10 -14   0   -1.00    2.10
   9 -14   0   16.70    7.70
  14   9   0   -0.30    2.40
   9 -14   0   -0.70    2.00
 -14  -9   0    1.80    7.90
  14   8   0   75.69    5.90
  -8  14   0   74.59    5.50
 -14  -8   0   71.79   13.10
   8 -14   0   79.89   13.10
  14   7   0    0.80    2.30
 -14  -7   0   -4.20    6.20
  -7  14   0    4.20    3.30
   7 -14   0    3.60    6.30
   6 -14   0   77.69   13.20
  14   6   0   76.99    5.60
  -6  14   0   65.19    5.10
 -14  -6   0   67.79   13.60
  -5  14   0    0.50    1.70
 -14  -5   0    0.70    5.90
  14   5   0    0.50    2.30
   5 -14   0   -6.70    4.50
  -4  14   0   17.60    2.70
   4 -14   0    5.70    6.60
 -14  -4   0   10.40    7.80
  14   4   0   17.60    2.80
  -3  14   0    0.60    1.70
 -14  -3   0    6.70    7.10
   3 -14   0    1.00    5.20
  14   3   0    1.20    1.90
  14   2   0   72.39    5.00
 -14  -2   0   55.39   11.90
   2 -14   0   78.89   12.30
  -2  14   0   69.19    4.90
 -14  -1   0   -8.60    6.20
  -1  14   0    0.60    2.10
   1 -14   0    2.50    5.60
  14   1   0    0.00    1.80
  14   0   0   67.79    4.90
   0 -14   0   84.09   12.50
   0  14   0   80.29    5.80
  -1 -14   0   12.30    5.60
   1  14   0    0.70    1.90
  14  -1   0    0.60    1.80
  14  -2   0   62.29    4.60
   2  14   0   71.89    5.00
  -2 -14   0   71.59   11.90
  14  -3   0   -0.50    1.60
  -3 -14   0    1.90    5.50
   3  14   0   -0.50    1.70
 -14   3   0    5.20    8.50
 -14   4   0   19.80   10.40
  14  -4   0   15.00    2.40
  -4 -14   0    9.60    6.70
   4  14   0   21.20    3.10
 -14   5   0   10.50   11.50
  -5 -14   0   14.40    6.70
   6  14   0   80.79    5.70
  14  -6   0   71.39    4.80
  -6 -14   0   64.69   11.80
 -14   6   0   73.49   20.60
  14  -7   0    3.70    1.80
   7  14   0    3.10    2.40
  -7 -14   0   -2.00    6.00
 -14   7   0  -12.70   12.20
  14  -8   0   69.09    4.70
 -14   8   0   56.99   18.60
  -8 -14   0   66.69   12.00
   8  14   0   67.29    5.60
   9  14   0   -1.90    2.60
  -9 -14   0   -5.00    5.70
  14  -9   0   -1.30    1.80
  14  -9   0    2.70    6.90
 -14   9   0    9.90   15.50
  14 -10   0    0.20    1.90
  10  14   0   -0.80    2.60
  14 -10   0   -1.30    7.00
 -10 -14   0   -4.20    7.30
  -8  15   0   -0.60    2.10
  15   8   0   -2.20    2.30
   8 -15   0   -0.60    6.90
 -15  -7   0   -5.70    7.30
  15   7   0   11.10    2.70
   7 -15   0    2.30    7.10
  -7  15   0   11.10    2.50
  15   6   0    0.90    2.30
   6 -15   0    7.20    7.00
  -6  15   0   -2.90    1.90
 -15  -6   0   -0.80    6.70
 -15  -5   0   36.00   10.40
  15   5   0   35.20    3.90
   5 -15   0   51.59   11.30
  -5  15   0   38.70    3.90
   4 -15   0    7.10    7.20
 -15  -4   0    1.30    7.10
  15   4   0    1.70    2.10
  -4  15   0    1.80    2.00
 -15  -3   0  124.29   17.50
  -3  15   0  137.59    7.70
   3 -15   0  152.38   17.80
  15   3   0  139.59    7.90
  15   2   0    1.90    2.00
  -2  15   0   -2.00    1.90
   2 -15   0    3.30    5.70
 -15  -2   0    3.20    7.70
  -1  15   0   22.60    3.00
   1 -15   0   28.00    9.50
 -15  -1   0   19.70    9.70
  15   1   0   18.00    2.80
  15   0   0   -0.50    1.80
   0  15   0   -0.40    1.90
 -15   0   0   -1.90    7.60
   0 -15   0    5.30    6.00
   1  15   0   29.20    3.50
  15  -1   0   19.10    2.80
 -15   1   0   17.00    9.70
  -1 -15   0   18.80    7.40
  15  -2   0   -0.80    1.80
   2  15   0    0.10    1.80
  -2 -15   0    5.10    6.10
 -15   2   0   -1.20    9.10
 -15   3   0  110.09   20.10
   3  15   0  130.49    7.60
  15  -3   0  128.19    7.20
  -3 -15   0  153.78   16.00
  15  -4   0   -1.30    1.70
   4  15   0    1.80    2.20
  -4 -15   0    1.20    6.70
 -15   4   0    4.00    9.40
 -15   5   0   22.10   14.80
  -5 -15   0   25.60    8.80
   5  15   0   41.60    4.30
  15  -5   0   39.40    3.70
 -15   6   0    3.60   15.40
  -6 -15   0   -1.60    6.10
   6  15   0    0.70    2.30
  15  -6   0    2.10    1.70
 -15   7   0   14.50   15.50
   7  15   0    8.60    2.90
  15  -7   0    5.10    2.10
  -7 -15   0    0.80    7.10
   8  15   0   -0.10    2.50
  -8 -15   0   -1.80    7.40
 -15   8   0   14.80   17.60
  15  -8   0   -0.90    1.70
  -6  16   0    2.90    2.30
   6 -16   0    3.90    7.90
  16   6   0    1.00    2.30
   5 -16   0    4.10    7.20
 -16  -5   0   15.00    8.10
  -5  16   0    0.30    2.10
  16   5   0    2.60    2.40
  -4  16   0  120.49    7.20
 -16  -4   0   87.49   16.50
   4 -16   0  126.89   16.90
  16   4   0  116.19    7.30
 -16  -3   0    3.50    8.50
  -3  16   0    0.60    2.20
   3 -16   0    5.00    6.60
  16   3   0   -2.90    1.90
  -2  16   0   47.60    4.30
   2 -16   0   37.70    9.40
 -16  -2   0   37.90   12.70
  16   2   0   45.30    4.90
  16   1   0    2.60    2.10
 -16  -1   0   14.80    9.20
   1 -16   0   -1.10    6.00
  -1  16   0   -2.30    1.90
   0  16   0    1.90    2.30
 -16   0   0    2.60    9.00
   0 -16   0   -1.40    6.30
  16   0   0    0.00    1.90
 -16   1   0    0.20    9.30
  -1 -16   0   11.50    6.90
  16  -1   0    0.20    1.90
   1  16   0   -0.80    2.10
   2  16   0   44.60    4.40
  16  -2   0   43.90    4.00
  -2 -16   0   64.59   12.20
 -16   2   0   43.20   14.00
   3  16   0    2.20    2.10
 -16   3   0  -23.80    8.90
  -3 -16   0    0.60    6.10
  16  -3   0    0.40    2.00
  16  -4   0  106.19    6.60
  -4 -16   0  141.89   17.80
   4  16   0  122.89    7.40
 -16   4   0  122.29   24.40
  -5 -16   0  -15.00    7.30
  16  -5   0   -0.20    1.80
 -16   5   0   -1.70   14.40
   5  16   0   -1.70    2.40
  16  -6   0   -2.90    1.80
 -16   6   0  -10.20   14.80
  -6 -16   0    3.20    7.40
   6  16   0   -0.60    2.20
  -3  17   0   48.70    4.60
  17   3   0   54.09    4.80
   3 -17   0   47.40   11.30
  17   2   0   -2.80    2.10
  -2  17   0    5.90    2.70
 -17  -2   0    5.20   10.30
  17   1   0    6.10    2.30
  -1  17   0   13.10    3.00
 -17  -1   0    7.20   11.40
 -17   0   0    8.00   11.20
   0  17   0    3.90    2.40
  17   0   0    1.80    2.20
  17  -1   0    9.70    2.80
 -17   1   0   -6.60   10.50
  -1 -17   0   -0.70   12.40
   1  17   0    8.70    2.90
  17  -2   0   -0.30    2.10
  -2 -17   0    9.90    7.20
 -17   2   0    7.20   12.50
 -17   3   0   11.50   14.50
  -3 -17   0   64.59   13.90
  17  -3   0   50.79    4.40
   3  17   0   56.99    5.00
   0   0  -1   70.79    2.90
   0   0  -1   65.19    2.90
   0   0   1   67.49    3.40
   0   1  -1   44.60    1.90
   1   0  -1   39.20    1.90
   0  -1  -1   43.20    2.30
   0   1  -1   41.90    2.70
   1   0  -1   41.70    2.10
  -1   0  -1   43.40    2.90
  -1   0  -1   42.30    1.80
   0  -1  -1   41.20    1.90
   1   0   1   42.60    2.80
   0  -1   1   40.40    4.00
   0  -1   1   42.40    1.90
   1   0   1   43.10    1.80
  -1   0   1   40.70    2.10
   0   1   1   41.80    1.90
   0   1   1   40.80    2.20
  -1   0   1   45.00    2.00
   0  -1   1   42.20    2.70
   1   1  -1   63.69    2.90
   1   1  -1   61.59    3.50
   1  -1  -1   69.09    2.90
  -1  -1  -1   64.29    2.80
  -1   1  -1   62.69    2.70
   1  -1  -1   65.59    3.90
  -1   1  -1   73.69    5.40
  -1  -1  -1   62.39    3.60
  -1  -1   1   64.19    2.90
   1  -1   1   60.89    4.80
   1  -1   1   62.39    2.70
  -1   1   1   70.19    2.90
  -1   1   1   63.29    4.10
   1   1   1   63.09    2.80
  -2  -1  -1   34.90    1.60
  -1   2  -1   27.10    5.10
  -2  -1  -1   32.30    2.80
   2   1  -1   37.10    2.60
  -1   2  -1   34.30    1.60
   1  -2  -1   35.10    2.50
   2   1  -1   34.70    1.80
   1  -2  -1   36.40    1.70
   2   1   1   39.90    2.90
   1  -2   1   34.80    5.20
  -2  -1   1   32.70    1.80
   2   1   1   35.30    1.60
   1  -2   1   31.10    1.60
  -2  -1   1   31.00    2.50
  -1   2   1   37.70    2.50
  -1   2   1   35.20    1.70
   0   2  -1  334.37   14.20
   0   2  -1  355.76   15.80
  -2   0  -1  338.57   16.00
   0  -2  -1  356.86   15.20
   2   0  -1  397.26   15.10
  -2   0  -1  342.17   14.10
   2   0  -1  348.67   14.30
   0  -2   1  343.97   15.70
   2   0   1  337.07   14.00
  -2   0   1  313.67   14.40
   0  -2   1  342.97   14.20
  -2   0   1  327.37   15.00
   0   2   1  339.57   14.20
   2   0   1  356.66   16.70
   0   2   1  346.57   15.10
  -1  -2  -1   36.70    2.70
  -1  -2  -1   33.70    1.80
  -2   1  -1   28.80    3.70
   1   2  -1   40.20    3.30
   1   2  -1   36.60    1.80
   2  -1  -1   36.20    2.70
   2  -1  -1   36.50    1.80
   2  -1  -1   34.30    1.80
   1   2   1   35.90    1.70
   1   2   1   35.70    2.70
  -2   1   1   35.00    2.90
  -1  -2   1   35.60    2.80
   2  -1   1   35.10    1.50
  -1  -2   1   36.40    1.90
   2  -1   1   34.20    3.50
   2  -1   1   34.60    1.50
   2   2  -1  101.29    4.40
   2   2  -1  107.69    5.80
   2  -2  -1   95.49    4.30
  -2   2  -1   95.99    4.10
   2  -2  -1   97.29    6.90
  -2   2  -1   77.29    7.70
  -2  -2  -1   95.99    4.30
  -2  -2  -1   98.89    5.80
  -2   2   1  100.39    7.60
   2   2   1   94.89    4.30
  -2  -2   1   96.99    4.40
   2  -2   1  106.19    8.10
  -2  -2   1  109.39    6.50
   2   2   1   91.59    5.60
   2  -2   1   99.79    4.10
  -3  -2  -1   30.60    3.70
  -3  -2  -1   31.80    1.60
   2  -3  -1   28.00    1.60
   3   2  -1   30.10    3.00
  -2   3  -1   23.90    5.50
  -2   3  -1   27.90    1.40
   2  -3  -1   32.00    5.50
   3   2  -1   31.70    1.80
   2  -3  -1   33.20    4.20
   3   2   1   29.00    1.60
   2  -3   1   29.90    1.40
  -3  -2   1   29.30    1.70
  -3  -2   1   26.90    2.90
   3   2   1   29.30    3.40
   2  -3   1   27.40    5.30
  -2   3   1   29.40    1.70
   1  -3  -1   17.30    2.30
  -3  -1  -1   22.00    1.20
   3   1  -1   23.40    1.40
   3   1  -1   21.80    2.50
  -3  -1  -1   20.10    2.90
   1  -3  -1   21.70    1.20
  -1   3  -1   19.80    1.10
  -3  -1   1   21.10    2.90
   1  -3   1   20.10    1.10
   3   1   1   19.20    1.10
   1  -3   1   21.30    3.20
  -1   3   1   21.50    1.30
  -3  -1   1   22.20    1.30
  -1   3   1   18.80    2.40
   3   1   1   20.70    2.80
   1  -3   1   28.60    5.80
   0   3  -1  266.87   10.80
   0  -3  -1  256.77   12.20
  -3   0  -1  254.97   13.20
  -3   0  -1  260.57   10.60
   3   0  -1  269.97   10.90
   0   3  -1  262.37   12.90
   0  -3  -1  266.67   10.80
   3   0   1  254.57   10.60
   3   0   1  246.38   12.80
   0   3   1  247.38   12.20
   0  -3   1  258.57   10.80
   0  -3   1  262.17   12.80
   0   3   1  254.77   10.80
  -3   0   1  241.88   10.80
  -1  -3  -1   26.40    2.70
   1   3  -1   20.60    1.30
   3  -1  -1   22.90    1.40
   1   3  -1   24.30    3.00
  -3   1  -1   19.80    3.60
  -3   1  -1   20.80    1.00
   3  -1  -1   23.20    3.20
   1   3   1   22.80    2.70
  -3   1   1   21.90    2.90
   3  -1   1   20.20    1.00
   1   3   1   20.60    1.30
  -1  -3   1   23.40    1.40
  -1  -3   1   21.10    2.70
  -3   1   1   21.80    1.30
   3  -1   1   21.10    3.50
   2   3  -1   30.50    3.00
   3  -2  -1   26.00    3.60
   3  -2  -1   31.10    1.70
   2   3  -1   28.10    1.70
  -2  -3  -1   28.90    1.60
  -2  -3  -1   28.40    3.50
   3  -2  -1   28.20    1.60
  -3   2  -1   24.00    4.60
  -2  -3   1   25.30    1.60
  -2  -3   1   29.20    3.10
   3  -2   1   28.50    1.30
   2   3   1   27.70    1.60
   2   3   1   30.20    3.00
  -3   2   1   40.10    5.40
   3  -2   1   27.30    4.60
   3  -2   1   29.30    1.40
  -3   3  -1   46.80    7.90
  -3   3  -1   45.40    2.00
   3   3  -1   42.40    2.40
   3   3  -1   39.20    3.70
  -3  -3  -1   44.10    2.30
   3  -3  -1   53.19    6.30
   3  -3  -1   40.90    2.20
  -3  -3  -1   42.00    4.20
   3   3   1   44.20    4.00
  -3   3   1   43.80    2.30
   3  -3   1   43.20    6.80
   3   3   1   43.80    2.20
  -3  -3   1   48.80    4.20
   3  -3   1   42.70    2.00
  -3  -3   1   41.60    2.40
  -3   3   1   37.30    6.50
   4   3  -1   25.60    1.80
   3  -4  -1   29.80    4.10
  -3   4  -1   28.30    6.90
   3  -4  -1   22.30    5.50
  -3   4  -1   24.60    1.40
   3  -4  -1   26.30    1.60
   4   3  -1   22.80    3.60
  -4  -3  -1   25.20    1.60
  -4  -3  -1   23.80    3.70
   3  -4   1   36.60    7.00
   4   3   1   34.30    4.20
  -3   4   1   25.70    1.70
  -4  -3   1   21.80    1.70
   4   3   1   25.60    1.60
   3  -4   1   26.20    1.40
  -4  -3   1   23.80    3.60
   2  -4  -1   72.29    3.30
  -4  -2  -1   70.69    5.70
   2  -4  -1   69.39    5.40
   2  -4  -1  103.49   11.50
  -2   4  -1   69.39    3.10
   4   2  -1   59.89    4.90
  -4  -2  -1   68.39    3.30
  -4  -2   1   79.99    5.50
   4   2   1   72.99    5.40
  -2   4   1   67.99    3.30
   2  -4   1   75.89    6.10
   2  -4   1   73.99   10.10
  -4  -2   1   65.69    3.40
   4   2   1   67.59    3.30
   2  -4   1   69.19    3.20
  -1   4  -1   27.50    3.90
   1  -4  -1   23.80    1.40
  -1   4  -1   24.10    1.30
  -4  -1  -1   23.20    1.40
   1  -4  -1   21.50    3.10
  -4  -1  -1   20.60    3.30
   4   1  -1   25.60    3.10
   4   1  -1   21.70    1.60
  -1   4   1   21.60    3.00
  -4  -1   1   24.70    1.50
   4   1   1   32.20    3.80
  -1   4   1   22.60    1.50
   1  -4   1   22.30    1.40
  -4  -1   1   23.80    3.20
   1  -4   1   31.40    4.20
   1  -4   1   20.90    5.70
   4   1   1   25.30    1.50
   4   0  -1  472.75   21.30
   0  -4  -1  521.65   23.30
   0   4  -1  504.15   21.20
   0  -4  -1  515.75   21.20
  -4   0  -1  529.75   21.10
   0   4  -1  514.45   23.90
  -4   0  -1  506.25   24.50
   4   0  -1  462.15   22.80
   0   4   1  495.05   21.20
   4   0   1  513.55   24.00
   0  -4   1  546.05   24.10
  -4   0   1  525.45   23.50
   0   4   1  518.35   23.40
  -4   0   1  523.75   21.30
   0  -4   1  539.95   21.20
   4   0   1  521.35   21.10
  -1  -4  -1   29.70    3.70
  -1  -4  -1   23.30    1.50
   4  -1  -1   23.30    1.60
   4  -1  -1   22.70    3.00
   1   4  -1   26.50    3.60
  -4   1  -1   31.80    4.90
   1   4  -1   19.80    1.50
  -4   1  -1   23.70    1.20
  -1  -4   1   25.80    1.50
  -1  -4   1   21.90    3.20
   4  -1   1   24.30    3.60
   1   4   1   30.00    3.60
  -4   1   1   24.80    1.50
   4  -1   1   24.80    1.30
  -4   1   1   29.00    3.80
  -2  -4  -1   73.89    3.40
   2   4  -1   72.29    5.50
   2   4  -1   69.89    3.50
   4  -2  -1   79.29    5.90
   4  -2  -1   69.79    3.40
  -2  -4  -1   74.69    5.60
  -4   2  -1   66.79    8.20
   4  -2  -1   70.79    3.50
   4  -2   1   70.29    3.20
  -2  -4   1   67.99    5.40
  -4   2   1   78.09    6.80
   2   4   1   70.39    5.30
   4  -2   1   72.99    6.80
   4  -2   1   73.49    3.10
   2   4   1   67.39    3.40
  -2  -4   1   65.99    3.40
  -3  -4  -1   32.60    4.30
   3   4  -1   31.30    4.00
   4  -3  -1   23.60    1.70
   3   4  -1   28.30    1.80
   4  -3  -1   26.80    1.60
  -4   3  -1   23.20    1.40
  -3  -4  -1   26.50    1.70
  -4   3  -1   11.80    4.70
   4  -3  -1   26.70    4.60
   3   4   1   25.60    1.70
  -3  -4   1   28.70    3.90
   3   4   1   35.80    4.40
   4  -3   1   39.30    6.30
   4  -3   1   23.80    1.30
  -4   3   1   20.60    4.90
  -3  -4   1   24.90    1.70
   4  -4  -1  488.25   20.40
  -4   4  -1  464.15   29.70
   4   4  -1  471.95   23.40
   4  -4  -1  516.35   26.60
   4   4  -1  469.45   20.60
  -4   4  -1  485.85   20.20
  -4  -4  -1  501.95   24.00
  -4  -4  -1  487.35   20.50
  -4  -4   1  518.35   23.90
  -4   4   1  500.95   29.20
  -4  -4   1  508.55   20.60
   4   4   1  483.85   20.50
   4   4   1  503.75   23.70
   4  -4   1  521.65   28.10
   4  -4   1  471.15   20.10
  -4   4   1  480.65   20.50
   5   4  -1   19.40    3.60
  -4   5  -1    5.00    5.20
   5   4  -1   14.00    1.60
  -5  -4  -1   16.00    1.50
  -4   5  -1   12.90    1.20
   4  -5  -1   14.60    1.30
   4  -5  -1   14.70    3.60
  -5  -4  -1   12.60    3.30
   4  -5  -1    6.70    4.00
  -5  -4   1   16.60    3.30
   4  -5   1   13.10    1.00
  -5  -4   1   12.20    1.40
   4  -5   1   10.60    5.90
   5   4   1   18.60    3.70
   5   4   1   13.50    1.40
  -4   5   1   14.00    1.40
  -3   5  -1  586.44   24.40
  -5  -3  -1  607.74   24.70
   3  -5  -1  601.74   24.60
  -5  -3  -1  619.24   28.70
   3  -5  -1  592.94   28.10
   3  -5  -1  585.04   33.00
   5   3  -1  641.54   28.00
   5   3  -1  579.44   24.80
   3  -5   1  587.44   28.90
  -3   5   1  573.04   24.60
   5   3   1  571.04   24.60
   5   3   1  577.94   27.80
  -5  -3   1  591.74   24.80
  -5  -3   1  606.34   28.10
   3  -5   1  574.24   24.40
   3  -5   1  644.54   34.90
   5   2  -1   38.60    4.50
   2  -5  -1   25.80    1.70
   2  -5  -1   17.30    5.80
  -5  -2  -1   28.40    4.50
  -5  -2  -1   27.10    1.60
   5   2  -1   25.60    1.80
   2  -5  -1   22.60    3.60
  -2   5  -1   27.00    1.60
   2  -5   1   24.40    1.50
   2  -5   1   39.20    8.60
   5   2   1   26.00    3.80
  -5  -2   1   27.30    1.80
  -5  -2   1   23.90    3.70
   2  -5   1   24.20    4.10
  -2   5   1   27.40    1.80
   5   2   1   24.60    1.70
  -1   5  -1   32.20    1.90
  -5  -1  -1   35.40    5.10
  -5  -1  -1   35.70    1.90
   1  -5  -1   32.70    4.20
   5   1  -1   36.60    2.20
   1  -5  -1   31.70    1.90
  -1   5  -1   33.80    4.70
   5   1  -1   46.20    4.00
  -5  -1   1   37.30    4.50
  -1   5   1   35.20    2.00
   5   1   1   38.80    4.70
   1  -5   1   36.90    4.90
   5   1   1   32.20    1.90
  -1   5   1   34.40    4.30
  -5  -1   1   36.60    2.10
  -5   0  -1   46.10    6.20
   5   0  -1   43.90    4.00
   5   0  -1   40.00    2.40
   0  -5  -1   43.40    2.30
  -5   0  -1   41.80    2.10
   0   5  -1   46.20    4.70
   0  -5  -1   45.80    4.40
   0   5  -1   44.30    2.30
   0  -5   1   38.20    4.80
   0  -5   1   43.30    2.30
  -5   0   1   44.30    2.40
   0   5   1   39.70    4.20
   0   5   1   39.90    2.30
  -5   0   1   46.30    5.20
   5   0   1   44.60    2.20
   5   0   1   44.80    4.50
   5  -1  -1   39.70    4.00
   5  -1  -1   29.90    2.00
  -1  -5  -1   29.50    1.90
  -1  -5  -1   33.00    4.40
  -5   1  -1   30.30    5.30
   1   5  -1   34.00    4.50
   1   5  -1   32.90    2.00
  -5   1  -1   33.90    1.80
  -1  -5   1   30.40    4.10
  -1  -5   1   34.20    2.00
   5  -1   1   38.90    5.30
  -5   1   1   33.50    2.00
   1   5   1   30.50    4.00
  -5   1   1   33.80    4.70
   1   5   1   37.40    2.00
   5  -1   1   33.70    1.70
  -5   2  -1   38.10    6.50
   5  -2  -1   27.60    3.80
   2   5  -1   23.00    1.80
   5  -2  -1   25.50    1.80
   2   5  -1   30.60    4.40
  -2  -5  -1   29.40    1.80
   5  -2  -1   26.50    1.80
  -2  -5  -1   23.80    3.80
   5  -2   1   27.10    1.50
  -2  -5   1   32.90    4.60
   5  -2   1   25.80    4.70
  -5   2   1   29.30    5.30
  -2  -5   1   26.10    1.80
   2   5   1   26.60    1.80
   2   5   1   30.60    4.20
   5  -3  -1  546.55   24.10
   3   5  -1  532.65   27.10
  -3  -5  -1  598.64   27.70
  -5   3  -1  591.14   32.20
   5  -3  -1  585.44   24.10
   5  -3  -1  596.34   28.60
  -3  -5  -1  596.84   24.10
   3   5  -1  579.94   24.20
  -3  -5   1  573.84   24.20
  -5   3   1  562.34   30.70
   5  -3   1  596.04   23.70
   5  -3   1  546.55   24.30
   3   5   1  557.94   24.10
   5  -3   1  618.44   30.10
   3   5   1  588.14   27.30
  -3  -5   1  623.54   27.90
   4   5  -1   14.20    3.90
  -5   4  -1    9.80    4.50
   4   5  -1    9.80    1.40
   5  -4  -1   15.30    1.30
   5  -4  -1   13.50    1.40
   5  -4  -1   14.80    3.80
  -4  -5  -1   17.40    1.70
  -4  -5  -1   11.80    3.20
   5  -4   1   13.90    1.20
   4   5   1   11.50    3.00
   5  -4   1   12.90    5.60
  -4  -5   1   15.10    1.60
  -5   4   1   11.90    4.70
   5  -4   1   12.20    1.00
  -4  -5   1    9.70    3.00
   4   5   1   10.00    1.20
   5  -5  -1  248.18   10.50
  -5  -5  -1  238.18   10.70
  -5  -5  -1  253.97   14.80
  -5   5  -1  234.88   20.60
   5   5  -1  237.98   10.80
   5  -5  -1  240.98   16.80
  -5   5  -1  237.28   10.40
   5   5  -1  255.47   14.30
   5   5   1  268.67   14.60
  -5  -5   1  224.38   10.70
  -5  -5   1  238.28   14.50
  -5   5   1  252.17   10.70
   5  -5   1  240.58   18.10
  -5   5   1  245.78   19.70
   5   5   1  229.78   10.60
   5  -5   1  256.17   10.30
   5  -6  -1   12.20    5.00
  -5   6  -1   18.30    1.50
  -6  -5  -1   20.30    1.80
   6   5  -1   18.60    1.90
  -5   6  -1    9.70    6.70
   5  -6  -1   22.50    4.70
   6   5  -1   22.10    4.80
   5  -6  -1   18.90    1.60
  -6  -5  -1   17.30    4.50
   5  -6   1   16.30    1.30
  -5   6   1   15.70    1.70
   6   5   1   19.00    1.80
  -6  -5   1   18.10    4.20
  -6  -4  -1  241.88   11.00
   6   4  -1  252.87   14.30
   4  -6  -1  235.48   14.50
   6   4  -1  238.88   10.90
  -4   6  -1  244.58   10.40
  -6  -4  -1  251.57   15.10
   4  -6  -1  257.37   19.60
   6   4   1  246.08   14.30
  -6  -4   1  243.08   10.80
   4  -6   1  234.98   15.20
   6   4   1  241.98   10.70
  -4   6   1  244.48   10.70
  -6  -4   1  239.68   14.50
   4  -6   1  242.88   10.40
   4  -6   1  267.97   20.30
  -6  -3  -1   55.39    2.90
   6   3  -1   54.39    3.20
   3  -6  -1   47.80    9.30
   3  -6  -1   52.09    2.80
  -6  -3  -1   66.49    7.80
  -3   6  -1   53.89    2.80
   3  -6  -1   49.70    6.30
  -6  -3   1   53.19    3.10
   6   3   1   53.69    3.00
   3  -6   1   50.69   10.50
   3  -6   1   50.09    6.90
  -6  -3   1   57.29    5.80
  -3   6   1   51.59    3.00
   3  -6   1   52.29    2.70
   6   3   1   59.29    5.60
  -6  -2  -1   74.79    3.80
   2  -6  -1   74.99    3.80
  -2   6  -1   82.49    3.70
   6   2  -1   79.99    6.30
   2  -6  -1   73.09   11.90
   6   2  -1   77.19    4.00
   2  -6  -1   71.09    6.50
  -6  -2  -1   75.19    7.00
  -6  -2   1   88.39    6.90
   6   2   1   75.89    3.80
   6   2   1   77.99    6.60
   2  -6   1   72.69    7.10
   2  -6   1   95.39   16.70
  -2   6   1   76.99    3.90
   2  -6   1   78.29    3.70
  -6  -2   1   77.09    4.00
   1  -6  -1   11.50    3.00
  -6  -1  -1    8.20    0.90
   1  -6  -1    5.90    0.90
   6   1  -1    8.60    2.40
  -1   6  -1    8.70    1.00
  -1   6  -1    9.30    3.20
   6   1  -1    9.50    1.30
  -6  -1  -1    7.30    3.10
   1  -6   1    8.80    3.00
  -1   6   1   11.00    2.90
   6   1   1    9.10    2.50
   1  -6   1    6.40    0.90
   6   1   1    7.50    0.90
  -6  -1   1    7.20    2.80
  -1   6   1    6.80    1.00
  -6  -1   1   10.50    1.20
   0   6  -1   45.20    2.40
  -6   0  -1   38.70    2.20
   0   6  -1   50.79    6.30
  -6   0  -1   32.70    5.50
   6   0  -1   43.70    5.00
   6   0  -1   44.30    2.60
   0  -6  -1   52.69    5.90
   0  -6  -1   40.70    2.40
   0   6   1   42.10    5.20
  -6   0   1   41.70    2.50
   0  -6   1   40.40    5.30
  -6   0   1   49.50    6.10
   0   6   1   41.40    2.40
   0  -6   1   42.30    2.40
   6   0   1   49.00    6.00
   6   0   1   42.50    2.30
  -1  -6  -1    8.70    2.80
  -6   1  -1   10.40    3.50
   6  -1  -1    8.50    2.40
   1   6  -1    7.30    1.00
   6  -1  -1    8.70    1.20
   1   6  -1    4.50    2.30
  -6   1  -1    7.30    0.80
  -1  -6  -1    5.80    0.90
   1   6   1    6.60    1.00
   6  -1   1    6.70    2.70
  -6   1   1    8.10    1.00
  -1  -6   1    5.50    2.30
  -6   1   1   16.10    3.80
  -1  -6   1    7.70    1.10
   6  -1   1    9.70    1.00
   1   6   1    8.40    2.70
   2   6  -1   78.09    3.90
   6  -2  -1   80.39    4.00
   2   6  -1   78.69    6.80
   6  -2  -1   66.99    6.20
   6  -2  -1   74.59    3.80
  -2  -6  -1   70.49    3.80
  -6   2  -1   88.89    8.90
  -2  -6  -1   77.09    6.60
  -2  -6   1   83.29    6.80
   2   6   1   66.99    6.10
   6  -2   1   80.59    3.50
   6  -2   1   73.59    3.50
  -6   2   1   70.79    8.60
   2   6   1   72.79    3.80
   6  -3  -1   63.39    6.50
  -6   3  -1   51.49    8.50
   6  -3  -1   49.80    3.10
  -3  -6  -1   63.09    7.00
   6  -3  -1   51.39    2.90
   3   6  -1   53.39    5.60
   3   6  -1   53.09    3.10
  -3  -6  -1   52.99    3.00
  -6   3   1   46.20    7.70
  -3  -6   1   51.49    6.40
   3   6   1   55.19    6.50
   6  -3   1   66.29    8.40
   6  -3   1   54.59    2.60
   6  -3   1   50.79    2.70
   3   6   1   58.19    3.10
   6  -4  -1  220.38   15.20
  -6   4  -1  264.77   20.20
   4   6  -1  231.88   10.70
  -4  -6  -1  254.07   14.70
   4   6  -1  233.38   14.10
   6  -4  -1  239.58   10.50
  -4  -6  -1  241.08   10.60
   6  -4  -1  217.38   10.60
   6  -4   1  254.17   17.00
   4   6   1  262.27   14.50
   6  -4   1  238.28   10.30
   4   6   1  249.58   10.60
  -4  -6   1  241.48   14.60
  -4  -6   1  239.78   10.70
  -6   4   1  274.17   19.50
   6  -4   1  243.58   10.10
  -5  -6  -1   18.60    1.90
  -5  -6  -1   22.90    4.80
  -6   5  -1   14.80    7.30
   6  -5  -1   17.90    1.80
   5   6  -1   19.20    2.00
   6  -5  -1   26.10    5.90
  -5  -6   1   21.80    4.80
   5   6   1   18.10    1.80
  -6   5   1   21.20    8.00
   6  -5   1   17.30    1.30
   6  -5   1   19.10    1.60
  -6   6  -1   64.99    3.40
  -6   6  -1   54.99   11.70
   6  -6  -1   52.09    8.90
   6  -6  -1   66.59    3.40
  -6  -6  -1   63.79   10.00
   6   6   1   63.19    3.70
  -6   6   1   34.10    9.00
  -6   6   1   62.69    3.70
  -6  -6   1   71.59    8.60
   6  -6   1   65.29    3.20
  -6   7  -1    8.20    7.90
   6  -7  -1    3.50    1.10
  -7  -6  -1    1.00    3.50
  -6   7  -1    3.30    1.00
   7   6  -1    2.90    1.40
   6  -7  -1    2.90    2.50
   7   6   1    2.80    1.20
   6  -7   1    2.50    3.30
  -6   7   1    1.80    1.10
   6  -7   1    3.80    0.80
  -7  -6   1    3.40    3.50
  -7  -5  -1   37.60    6.70
   5  -7  -1   31.20    7.50
   5  -7  -1   40.70    6.60
  -5   7  -1   37.90    2.40
   7   5  -1   38.10    3.30
   5  -7  -1   34.40    2.40
  -5   7   1   37.90    2.70
   5  -7   1   42.50    2.30
  -7  -5   1   30.90    5.80
   7   5   1   41.10    2.80
   4  -7  -1   19.80    4.80
   4  -7  -1   21.70    1.70
   7   4  -1   24.10    2.30
  -4   7  -1   22.30    1.70
  -7  -4  -1   16.80    4.70
  -7  -4  -1   22.10    1.90
   4  -7  -1   16.10    5.60
   4  -7   1   28.40    5.60
   4  -7   1   20.30    1.60
   7   4   1   24.50    2.10
  -7  -4   1   23.90    5.00
  -4   7   1   24.10    2.00
   7   3  -1  631.14   26.30
   3  -7  -1  594.24   30.40
  -7  -3  -1  660.33   31.80
  -7  -3  -1  624.14   26.10
   3  -7  -1  579.44   25.90
  -3   7  -1  628.84   25.80
   7   3  -1  653.43   30.10
   3  -7  -1  587.64   37.40
  -7  -3   1  620.94   30.70
   3  -7   1  619.54   40.70
   7   3   1  648.34   26.10
  -3   7   1  622.74   26.00
   3  -7   1  652.73   25.90
   3  -7   1  621.64   31.40
  -7  -3   1  590.44   26.20
   2  -7  -1    3.30    6.20
  -7  -2  -1    3.00    3.00
  -7  -2  -1    2.50    0.80
  -2   7  -1    3.50    0.90
   7   2  -1    4.50    1.20
   7   2  -1   12.70    3.30
   2  -7  -1    4.30    0.90
   2  -7  -1    6.10    2.70
   2  -7   1    7.40    5.50
  -7  -2   1    5.60    2.60
  -2   7   1    5.20    1.00
   2  -7   1   10.20    3.50
  -7  -2   1    4.80    1.00
   7   2   1    5.90    2.70
   2  -7   1    4.80    0.90
   7   2   1    4.80    1.00
   1  -7  -1  382.26   19.80
   7   1  -1  367.36   16.20
   1  -7  -1  382.46   16.00
  -7  -1  -1  382.36   21.30
  -7  -1  -1  371.76   15.90
  -1   7  -1  394.66   20.80
  -1   7  -1  371.56   15.90
   1  -7   1  381.26   20.50
   7   1   1  364.26   15.90
  -7  -1   1  376.66   20.30
  -1   7   1  371.66   16.00
   7   1   1  381.26   19.90
   1  -7   1  375.76   15.90
  -1   7   1  380.76   20.00
   7   0  -1   31.60    2.20
  -7   0  -1   22.60    5.20
   0   7  -1   25.50    1.90
   0  -7  -1   34.60    5.40
   0   7  -1   33.30    5.20
   0  -7  -1   27.40    2.00
   7   0  -1   35.40    4.90
  -7   0  -1   28.00    1.80
   0   7   1   27.60    5.00
  -7   0   1   30.00    2.10
   7   0   1   25.50    4.70
  -7   0   1   27.80    5.00
   0  -7   1   31.90    5.30
   0   7   1   30.90    2.10
   0  -7   1   25.90    2.00
   7   0   1   27.50    1.90
   1   7  -1  345.97   19.50
  -1  -7  -1  364.86   19.20
  -7   1  -1  348.87   21.40
  -1  -7  -1  352.36   15.40
   7  -1  -1  301.67   18.30
   1   7  -1  350.26   15.30
   7  -1  -1  385.06   15.60
  -7   1  -1  361.56   15.10
  -7   1   1  409.66   21.10
  -1  -7   1  363.26   15.40
  -1  -7   1  389.56   19.80
   7  -1   1  374.86   15.20
  -7   1   1  348.67   15.30
   1   7   1  375.76   15.40
   7  -1   1  337.77   19.70
   1   7   1  353.16   19.20
   7  -2  -1    6.20    1.30
   7  -2  -1    5.80    1.10
   7  -2  -1    5.20    2.70
   2   7  -1    4.50    3.00
  -2  -7  -1    5.60    1.10
  -7   2  -1    8.50    4.10
  -2  -7  -1    8.60    3.10
   2   7  -1    6.10    1.20
   7  -2   1    4.40    0.80
  -2  -7   1    3.10    2.60
  -2  -7   1    6.90    1.10
   2   7   1    4.50    1.10
   7  -2   1    1.80    2.60
   7  -2   1    4.90    0.90
  -7   2   1    0.20    2.90
   2   7   1    4.60    2.80
  -7   2   1    3.10    0.80
   7  -3  -1  620.54   30.40
  -3  -7  -1  637.84   30.10
   7  -3  -1  641.04   25.40
   3   7  -1  621.44   25.40
   7  -3  -1  621.94   25.20
  -7   3  -1  613.24   34.60
   7  -3   1  615.24   25.00
   7  -3   1  603.14   24.90
   3   7   1  585.64   29.40
  -3  -7   1  557.24   26.40
  -7   3   1  545.75   32.50
  -3  -7   1  572.84   29.70
   3   7   1  564.74   25.20
   7  -3   1  628.24   31.80
   7  -4  -1   21.00    4.80
   7  -4  -1   17.10    1.90
  -4  -7  -1   21.20    4.50
  -7   4  -1   22.00    7.50
   4   7  -1   25.60    2.20
  -4  -7   1   26.40    5.20
   7  -4   1   24.10    1.70
   7  -4   1   22.30    1.40
  -7   4   1   11.80    6.10
   4   7   1   26.10    2.20
   7  -5  -1   48.00    7.70
   5   7  -1   38.40    2.90
   7  -5  -1   38.20    2.40
  -7   5  -1   27.60    8.00
   7  -5  -1   33.90    2.70
  -5  -7  -1   34.50    6.30
   7  -5   1   40.30    2.10
  -7   5   1   37.60    9.80
  -5  -7   1   37.90    6.30
   7  -5   1   37.70    2.40
  -7   6  -1    4.80    6.00
   6   7  -1    2.00    1.20
   7  -6  -1    4.70    1.30
  -6  -7  -1    2.70    3.20
   7  -6  -1    0.90    0.80
  -6  -7   1    0.60    2.70
   7  -6   1    4.40    1.00
  -7   6   1   -0.90    6.20
   7  -6   1    2.50    0.80
   6   7   1    1.40    1.20
  -7   7  -1  417.76   33.60
  -7  -7  -1  434.16   24.40
   7  -7  -1  394.56   23.60
   7   7  -1  418.36   18.10
   7  -7  -1  411.46   18.10
  -7  -7   1  429.96   24.00
   7  -7   1  412.06   17.40
   7  -7   1  414.76   17.70
   7   7   1  405.26   18.00
   7  -8  -1    0.60    3.50
  -8  -7  -1    0.80    4.10
   8   7  -1    2.90    1.60
  -7   8  -1    1.20    1.00
   8   7   1    2.90    1.50
  -7   8   1    0.70    1.30
  -8  -7   1   -0.50    3.30
   7  -8   1   -6.10    2.70
   7  -8   1    0.30    0.80
   8   6  -1  352.46   15.80
  -6   8  -1  359.46   15.30
   6  -8  -1  374.66   21.80
  -8  -6  -1  390.96   22.70
  -8  -6   1  331.47   21.20
   6  -8   1  360.06   22.20
   6  -8   1  350.66   15.20
  -6   8   1  362.76   15.60
   8   6   1  342.87   15.60
   5  -8  -1    5.20    3.70
  -8  -5  -1    0.70    3.60
   8   5  -1   -0.30    1.20
  -5   8  -1   -0.20    0.80
  -8  -5   1    1.30    3.60
   5  -8   1   -0.20    0.80
   5  -8   1    1.00    3.40
   8   5   1    1.90    1.40
  -5   8   1   -0.90    1.00
  -4   8  -1    5.20    1.10
  -8  -4  -1    3.80    1.40
   4  -8  -1    4.10    3.40
  -8  -4  -1   -1.10    3.20
   4  -8   1    3.60    3.40
  -4   8   1    4.50    1.20
   4  -8   1    2.30    0.90
   8   4   1    3.40    1.30
   3  -8  -1   12.10    3.90
  -8  -3  -1   13.60    5.40
   8   3  -1   14.20    1.90
  -3   8  -1   15.50    1.50
  -8  -3  -1   19.90    1.80
   8   3   1   16.20    1.80
  -8  -3   1   16.70    4.40
  -3   8   1   14.60    1.70
   3  -8   1   15.20    1.50
   2  -8  -1  153.08   11.30
   2  -8  -1  135.09   18.00
   8   2  -1  146.69   11.80
  -8  -2  -1  149.09    7.10
   8   2  -1  159.28    7.40
  -2   8  -1  162.88    7.00
  -8  -2  -1  169.68   12.50
   2  -8   1  155.98    7.10
   8   2   1  153.08    7.10
  -8  -2   1  144.29    7.20
  -2   8   1  156.18    7.20
  -8  -2   1  143.79   11.40
   2  -8   1  156.18   11.90
   1  -8  -1   11.90    3.90
  -8  -1  -1   12.30    1.30
  -1   8  -1    9.60    1.30
   8   1  -1   10.90    3.30
   8   1  -1   11.50    1.70
  -8  -1  -1   10.30    4.20
  -1   8   1   12.50    3.80
   8   1   1   10.80    1.40
   1  -8   1   10.70    1.30
  -1   8   1   15.90    1.70
   1  -8   1    7.50    3.70
  -8  -1   1   13.50    4.00
  -8  -1   1   10.40    1.30
   0   8  -1  691.93   28.60
   0  -8  -1  660.53   33.20
   8   0  -1  672.43   28.80
   8   0  -1  702.53   32.80
  -8   0  -1  693.33   35.60
  -8   0  -1  693.13   28.50
  -8   0   1  685.73   28.70
   8   0   1  719.53   28.60
   0  -8   1  694.83   33.90
   0   8   1  655.83   33.50
  -8   0   1  643.84   34.10
   0  -8   1  696.03   28.70
   0   8   1  696.13   28.70
  -8   1  -1   10.70    1.10
   8  -1  -1   15.60    1.80
  -1  -8  -1   12.00    3.90
   1   8  -1    8.40    1.30
   8  -1  -1    9.90    3.30
  -8   1  -1   14.40    4.80
  -8   1   1   12.50    1.40
  -8   1   1   13.10    4.80
   1   8   1    9.70    1.50
  -1  -8   1   13.50    4.00
   8  -1   1   12.20    1.30
   8  -2  -1  152.88    7.10
  -8   2  -1  138.39   13.30
  -2  -8  -1  143.99   11.10
   8  -2  -1  145.49   10.90
   2   8  -1  153.58    7.00
   8  -2  -1  151.88    7.00
   8  -2   1  146.79    6.60
  -2  -8   1  147.99   11.00
   8  -2   1  142.89    6.70
   2   8   1  150.48    7.00
  -8   2   1  144.39    6.80
  -8   2   1  145.09   12.60
  -3  -8  -1   12.80    4.90
  -8   3  -1   13.20    6.30
   8  -3  -1   14.60    1.60
   8  -3  -1   19.30    2.10
   8  -3  -1   18.40    4.60
   8  -3   1   18.80    1.60
   3   8   1   19.30    1.90
   8  -3   1   16.20    1.30
  -8   3   1   11.10    5.00
  -3  -8   1   24.90    5.40
   4   8  -1    1.70    1.20
   8  -4  -1    4.60    1.30
  -4  -8  -1    4.40    3.10
  -8   4  -1    5.40    5.00
   8  -4  -1    3.10    0.90
  -4  -8   1    9.20    4.10
   8  -4   1    3.60    0.70
   8  -4   1    4.00    1.00
  -8   4   1   -5.30    3.90
   4   8   1    2.50    1.20
   8  -5  -1   -0.50    1.10
   8  -5  -1    1.40    0.80
   5   8  -1    0.30    1.20
  -5  -8  -1   -0.50    2.60
  -8   5  -1   11.10    6.00
   8  -5   1   -0.40    0.80
  -8   5   1   -5.10    4.70
  -5  -8   1   -2.30    2.80
   8  -5   1    0.10    0.60
   5   8   1   -0.20    1.20
  -6  -8  -1  348.47   21.10
   6   8  -1  332.37   15.40
   8  -6  -1  343.97   15.40
  -8   6  -1  330.47   29.20
   8  -6   1  339.17   15.00
  -8   6   1  360.66   28.20
   8  -6   1  353.36   14.70
   6   8   1  358.46   15.40
  -6  -8   1  362.26   21.30
  -7  -8  -1    0.00    3.30
   7   8  -1    0.60    1.40
  -8   7  -1   -3.00    6.70
   8  -7   1    0.50    0.90
   7   8   1    1.50    1.50
   8  -7   1    1.20    1.10
  -7  -8   1   -5.20    2.70
  -8   7   1    5.20    8.10
   8   8  -1  127.59    6.80
   8  -8  -1  127.99    6.60
  -8  -8  -1  111.69   11.70
  -8   8  -1  105.59   21.60
   8  -8  -1  146.99   12.50
  -8  -8   1  116.49   11.90
   8   8   1  120.39    6.50
   8  -8   1  127.69   12.60
   8  -8   1  116.39    6.10
   8  -8   1  126.29    5.80
   9   8  -1    1.60    1.80
   8  -9  -1   -4.20    4.00
   8  -9  -1    0.80    1.50
  -9  -8  -1   -6.70    3.60
   8  -9   1    1.70    4.60
  -9  -8   1    6.20    3.90
   8  -9   1    1.00    1.30
   9   8   1    0.30    1.50
  -7   9  -1  193.28    8.90
   9   7  -1  186.98    9.50
  -9  -7  -1  219.48   16.50
   7  -9  -1  202.68   15.50
  -7   9   1  186.38    9.20
   9   7   1  195.98    9.30
  -9  -7   1  167.58   15.00
   7  -9   1  196.88   16.10
   9   6  -1   23.00    2.70
  -9  -6  -1   33.90    7.50
   6  -9  -1   17.80    5.40
  -6   9  -1   22.50    2.10
   6  -9   1   23.20    2.30
  -6   9   1   27.10    2.60
   6  -9   1   23.60    6.70
  -9  -6   1   19.90    6.00
   9   6   1   24.70    2.60
   5  -9  -1  117.19   10.70
   9   5  -1  124.89    6.40
  -9  -5  -1  127.99   12.00
  -5   9  -1  119.19    5.80
   9   5   1  110.69    6.10
   5  -9   1  117.79    6.10
  -9  -5   1  114.29   11.30
   5  -9   1  118.59   11.60
  -5   9   1  120.79    6.10
   9   4  -1    1.00    1.40
  -9  -4  -1   -2.10    3.10
  -4   9  -1   -0.70    0.90
   4  -9  -1   -3.90    2.50
   9   4   1    0.20    1.20
   4  -9   1    2.90    3.40
   4  -9   1    0.30    1.00
  -4   9   1   -0.90    1.10
  -9  -4   1    4.20    3.90
  -9  -3  -1   52.09    3.20
   9   3  -1   47.70    3.60
   3  -9  -1   56.09    8.20
  -3   9  -1   53.89    3.20
  -9  -3  -1   52.99    9.00
   3  -9   1   62.69    8.90
   9   3   1   48.80    3.40
  -9  -3   1   71.09    9.10
  -3   9   1   55.99    3.40
   9   2  -1    8.60    1.70
  -9  -2  -1    5.80    3.70
  -2   9  -1    5.90    1.20
  -9  -2  -1    8.80    1.20
   2  -9   1    6.00    4.20
  -2   9   1   12.40    1.70
   9   2   1    8.30    1.40
   9   1  -1   15.90    2.00
  -1   9  -1   13.40    1.70
  -9  -1  -1   14.30    5.00
  -9  -1   1   14.30    4.40
  -1   9   1   18.40    2.00
   9   1   1   19.30    1.80
   1  -9   1   14.50    4.60
   0   9  -1   13.20    1.60
  -9   0  -1   11.40    4.80
   9   0  -1   12.30    1.70
   0  -9  -1    9.60    4.50
  -9   0  -1   11.50    1.40
   0  -9   1   13.60    4.60
  -9   0   1   10.20    1.50
   0   9   1   10.60    1.60
  -9   0   1   14.40    4.60
   9   0   1   11.40    1.50
  -1  -9  -1    7.70    3.80
   1   9  -1   14.80    1.80
   9  -1  -1   13.80    1.80
  -9   1  -1   12.90    1.30
  -9   1  -1   11.80    5.00
   1   9   1   14.20    1.70
   9  -1   1   14.50    1.60
  -9   1   1   19.50    5.60
  -1  -9   1   15.90    4.60
  -9   1   1   10.90    1.50
  -2  -9  -1    8.60    4.10
   9  -2  -1   10.90    1.40
   2   9  -1   10.40    1.60
  -9   2  -1    6.20    4.80
   9  -2  -1    8.10    1.50
  -2  -9   1   16.50    4.80
  -9   2   1   11.70    5.50
   9  -2   1   10.70    1.20
   2   9   1    8.40    1.50
   9  -2   1    8.70    1.30
  -9   2   1    9.10    1.20
   9  -3  -1   55.49    3.30
  -9   3  -1   57.29   10.80
  -3  -9  -1   63.79    8.60
   9  -3  -1   52.99    3.50
   3   9  -1   60.19    3.60
   3   9   1   52.19    3.50
   9  -3   1   52.79    3.10
   9  -3   1   50.49    2.80
  -3  -9   1   49.60    7.90
  -9   3   1   56.69   10.10
  -4  -9  -1    3.00    3.10
   4   9  -1   -1.20    1.20
  -9   4  -1    2.00    4.90
   9  -4  -1    0.10    0.80
   9  -4  -1   -0.40    1.20
   9  -4   1    1.30    0.70
   4   9   1    1.10    1.30
  -4  -9   1    0.00    3.20
   9  -4   1    0.60    0.90
  -9   4   1   12.10    7.60
  -9   5  -1   97.69   17.30
   9  -5  -1  119.89    6.20
  -5  -9  -1  119.09   10.90
   5   9  -1  119.89    6.30
   9  -5   1  115.89    5.70
  -9   5   1  120.29   17.20
   5   9   1  119.09    6.20
  -5  -9   1  128.29   11.60
   9  -5   1  118.29    5.40
  -6  -9  -1   16.10    5.50
  -9   6  -1    7.90    8.30
   9  -6  -1   18.50    2.70
   6   9  -1   27.20    2.80
  -9   6   1   26.90    9.30
   6   9   1   19.40    2.40
   9  -6   1   28.30    2.30
   9  -6   1   23.20    1.70
  -6  -9   1   25.90    6.40
   9  -7  -1  184.88    9.00
  -7  -9  -1  172.08   14.50
   7   9  -1  177.28    8.90
  -9   7  -1  156.08   23.90
   9  -7   1  178.48    8.00
   9  -7   1  173.68    8.40
  -7  -9   1  198.18   15.00
   7   9   1  188.08    8.90
  -9   7   1  201.58   26.00
  -9   8  -1    8.00    9.80
  -8  -9  -1    1.50    4.10
   8   9  -1    2.40    1.60
   9  -8  -1    0.90    1.50
   9  -8  -1   -0.10    3.80
   9  -8   1   -0.40    1.20
   9  -8   1    1.40    0.90
  -8  -9   1   -2.00    3.70
   8   9   1    1.30    1.60
   9  -9  -1   30.70    7.40
   9  -9  -1   34.90    3.40
   9   9  -1   38.40    3.60
  -9  -9  -1   19.30    7.20
   9  -9   1   32.50    2.80
   9  -9   1   28.50    8.10
   9   9   1   29.40    3.20
  -9  -9   1   33.00    8.00
 -10  -9  -1    2.00    5.40
   9 -10  -1   -0.40    1.70
   9 -10  -1    2.80    4.90
  10   9  -1    1.30    2.30
  10   9   1    0.70    1.80
   9 -10   1    6.30    5.80
   9 -10   1    3.40    1.60
  10   8  -1    8.20    2.30
 -10  -8  -1    4.70    5.70
  -8  10  -1   10.80    1.80
   8 -10  -1    7.10    5.20
   8 -10  -1   10.70    2.20
  -8  10   1    5.30    1.80
  10   8   1    9.40    2.10
 -10  -8   1    8.40    5.90
   8 -10   1    7.90    4.70
  10   7  -1   -2.10    1.60
  -7  10  -1    0.90    1.70
 -10  -7  -1    0.80    4.80
   7 -10  -1    1.00    4.40
  -7  10   1   -0.70    1.40
   7 -10   1   -1.20    4.00
 -10  -7   1    0.10    5.00
  10   7   1    1.10    1.60
  10   6  -1  319.67   14.60
   6 -10  -1  310.67   20.70
 -10  -6  -1  323.97   22.50
  10   6   1  316.97   14.40
   6 -10   1  295.27   21.40
  -6  10   1  329.87   14.40
 -10  -6   1  319.67   21.60
  10   5  -1    1.40    1.60
 -10  -5  -1    9.40    5.40
   5 -10  -1    2.60    4.20
  10   5   1    5.40    1.70
   5 -10   1   -3.50    3.40
 -10  -5   1    3.70    4.60
  -5  10   1    2.40    1.40
   4 -10  -1  357.46   21.30
  10   4  -1  324.57   14.90
  -4  10  -1  324.57   14.90
 -10  -4  -1  304.77   21.50
   4 -10   1  337.27   21.50
  -4  10   1  327.07   14.60
 -10  -4   1  312.67   21.00
  10   4   1  344.07   14.70
  10   3  -1    9.90    1.90
   3 -10  -1    5.80    4.00
  -3  10  -1    8.90    1.60
 -10  -3  -1   11.90    5.40
  10   3   1    7.20    1.60
   3 -10   1   13.00    5.40
  -3  10   1   10.30    1.70
 -10  -3   1    9.50    4.70
 -10  -2  -1  177.28   14.80
   2 -10  -1  153.08   12.40
  10   2  -1  152.58    7.60
  -2  10  -1  148.79    7.10
 -10  -2   1  149.09   12.90
   2 -10   1  143.49   12.60
  -2  10   1  146.99    7.30
  10   2   1  147.29    7.20
 -10  -1  -1   10.40    1.40
  10   1  -1   11.90    1.90
   1 -10  -1    2.80    3.30
  -1  10  -1    8.10    1.50
 -10  -1  -1    8.30    4.60
  10   1   1   10.90    1.60
   1 -10   1    8.90    4.70
 -10  -1   1    7.20    4.50
  -1  10   1    7.70    1.60
   0 -10  -1  592.14   30.20
 -10   0  -1  521.65   32.30
 -10   0  -1  573.54   23.80
  10   0  -1  551.74   24.30
   0  10  -1  569.74   24.00
   0  10   1  563.94   24.10
   0 -10   1  583.94   30.50
 -10   0   1  558.64   31.80
  10   0   1  576.74   24.00
 -10   1  -1   11.20    1.30
 -10   1  -1    4.40    5.10
   1  10  -1    8.60    1.60
  -1 -10  -1    9.30    4.80
  10  -1  -1   10.80    1.90
  10  -1   1   11.90    1.60
 -10   1   1   -2.40    3.10
  -1 -10   1   14.10    5.20
   1  10   1    9.20    1.80
  10  -2  -1  152.98    7.50
  -2 -10  -1  138.39   12.10
   2  10  -1  144.99    7.30
 -10   2  -1  159.68   15.70
  10  -2   1  142.69    6.90
  10  -2   1  154.78    7.10
 -10   2   1  120.29   15.30
   2  10   1  162.38    7.50
  -2 -10   1  165.28   13.10
  -3 -10  -1    2.80    4.20
  10  -3  -1    6.40    1.60
   3  10  -1    9.00    1.80
 -10   3  -1    8.30    6.00
  -3 -10   1    6.60    4.50
  10  -3   1    7.30    1.30
   3  10   1    6.70    1.60
 -10   3   1    0.00    4.10
  10  -3   1    7.90    1.10
  -4 -10  -1  307.47   20.40
  10  -4  -1  338.47   14.60
   4  10  -1  317.37   14.50
 -10   4  -1  306.57   26.30
  -4 -10   1  331.17   20.70
   4  10   1  327.77   14.50
 -10   4   1  305.57   25.20
  10  -4   1  317.17   13.70
  10  -4   1  329.47   14.10
  -5 -10  -1    0.60    3.10
  10  -5  -1    2.40    1.60
 -10   5  -1   -3.80    5.60
   5  10  -1    1.60    1.70
  10  -5   1    5.10    1.00
  10  -5   1    3.40    1.20
   5  10   1    3.80    1.60
  -5 -10   1    5.40    4.50
 -10   5   1    4.30    6.80
  10  -6  -1  328.37   14.50
   6  10  -1  318.97   14.50
  -6 -10  -1  337.77   21.40
 -10   6  -1  331.27   30.00
 -10   6   1  244.98   26.20
  10  -6   1  330.17   14.60
  -6 -10   1  316.67   21.10
  10  -6   1  302.97   14.00
   6  10   1  334.37   14.60
  -7 -10  -1   -1.40    4.30
   7  10  -1   -1.30    1.50
 -10   7  -1    5.50    7.70
  10  -7  -1    3.20    1.80
   7  10   1    0.20    1.60
  -7 -10   1    3.30    4.40
 -10   7   1    3.10    8.30
  10  -7   1    1.30    1.10
  10  -7   1   -1.80    0.80
  -8 -10  -1    5.60    4.90
  10  -8  -1   18.00    6.50
  10  -8  -1    8.40    2.00
   8  10  -1    8.60    2.20
 -10   8  -1    7.00   10.10
  10  -8   1    9.20    1.70
  10  -8   1    5.10    1.20
 -10   8   1    2.50   10.30
  -8 -10   1   10.40    5.60
   8  10   1    7.60    2.10
  10  -9  -1    6.50    5.10
  10  -9  -1    4.70    2.10
  -9 -10  -1   16.30    6.80
   9  10  -1    3.30    2.70
   9  10   1    3.90    2.00
  10  -9   1    2.20    1.70
  10  -9   1    5.70    6.00
 -10 -10  -1  179.38   17.40
  10 -10  -1  161.18    9.10
  10 -10  -1  173.28   16.20
  10  10  -1  192.88    9.60
  10 -10   1  168.08    8.70
  10  10   1  188.58    9.40
 -10 -10   1  183.58   17.00
  10 -10   1  207.38   18.30
  10 -11  -1    2.10    1.70
  11  10  -1    3.50    2.20
  10 -11  -1    5.40    5.70
 -11 -10  -1   -6.20    5.50
  11  10   1    1.10    2.10
  10 -11   1    3.00    1.80
  10 -11   1    3.50    6.30
 -11 -10   1    7.70    7.10
  11   9  -1   93.99    6.70
   9 -11  -1  114.99    6.80
 -11  -9  -1  129.09   16.40
   9 -11  -1  105.49   14.10
   9 -11   1  112.19    6.20
  11   9   1  120.29    6.90
 -11  -9   1  119.99   15.80
   9 -11   1  136.59   16.10
  -8  11  -1    2.50    1.50
   8 -11  -1    4.10    5.80
 -11  -8  -1   -2.90    5.70
  11   8  -1   -0.50    2.10
  -8  11   1    1.70    1.90
  11   8   1    2.30    1.80
   8 -11   1   -1.20    4.90
 -11  -7  -1    3.00    5.60
  -7  11  -1    1.00    1.50
  11   7  -1    4.10    1.90
   7 -11  -1    0.50    4.00
   7 -11   1    2.30    5.20
  -7  11   1   -1.30    1.50
  11   7   1    0.30    1.60
 -11  -7   1    2.80    4.80
   6 -11  -1    3.00    4.50
 -11  -6  -1   -2.60    3.70
  -6  11  -1   -0.20    1.40
  11   6  -1    0.80    1.90
  -6  11   1   -0.60    1.50
  11   6   1    0.10    1.60
 -11  -6   1    5.60    4.70
   6 -11   1   -2.50    3.00
   5 -11  -1   84.79   11.10
  -5  11  -1   85.69    4.80
 -11  -5  -1   75.19   12.60
  11   5  -1   88.89    5.50
   5 -11   1   88.89   12.10
  11   5   1   84.29    5.10
  -5  11   1   84.99    5.10
 -11  -5   1   75.19   10.70
  -4  11  -1    0.80    1.30
   4 -11  -1   -2.00    3.10
 -11  -4  -1   -3.10    4.00
  11   4  -1    0.90    1.50
  11   4   1    1.40    1.50
  -4  11   1   -0.10    1.40
   4 -11   1   -3.00    3.70
 -11  -4   1    3.30    4.00
   3 -11  -1  360.26   22.80
  11   3  -1  373.76   16.80
 -11  -3  -1  384.76   25.20
  -3  11  -1  377.56   16.30
   3 -11   1  386.26   24.00
 -11  -3   1  348.47   23.90
  -3  11   1  380.16   16.50
  11   3   1  378.36   16.50
  11   2  -1   -0.90    1.50
  -2  11  -1    0.50    1.30
 -11  -2  -1    4.00    4.10
   2 -11  -1    3.10    4.10
   2 -11   1   -0.30    3.40
  -2  11   1   -1.10    1.30
 -11  -2   1   -0.10    4.30
  11   1  -1   46.10    3.70
 -11  -1  -1   40.00    9.30
   1 -11  -1   51.99    8.10
  -1  11  -1   49.30    3.40
   1 -11   1   50.39    8.70
 -11  -1   1   34.30    8.10
  11   1   1   51.19    3.40
  -1  11   1   46.40    3.40
 -11   0  -1    2.70    4.80
 -11   0  -1   13.90    1.60
   0 -11  -1    6.50    4.30
   0  11  -1   15.00    2.00
  11   0  -1   13.90    2.00
   0  11   1   12.60    2.10
  11   0   1   10.50    1.70
   0 -11   1    4.40    4.20
 -11   0   1   12.70    5.20
 -11   1  -1   38.10    9.60
  11  -1  -1   42.30    3.50
   1  11  -1   48.00    3.40
 -11   1  -1   51.59    2.90
  -1 -11  -1   56.29    8.80
  11  -1   1   48.80    3.20
 -11   1   1   30.60    7.80
  -1 -11   1   39.70    7.50
   1  11   1   47.20    3.50
 -11   2  -1    1.40    4.40
  11  -2  -1   -0.90    1.30
   2  11  -1   -0.40    1.30
  -2 -11  -1   -0.30    3.80
   2  11   1    0.30    1.30
  11  -2   1    0.80    0.80
 -11   2   1    1.80    4.90
  -2 -11   1    3.50    3.50
  11  -2   1    2.70    1.20
 -11   3  -1  370.86   28.30
  11  -3  -1  371.06   16.50
  -3 -11  -1  351.96   22.70
   3  11  -1  364.86   16.40
  -3 -11   1  357.16   23.20
 -11   3   1  377.36   27.50
  11  -3   1  368.46   16.00
   3  11   1  382.96   16.40
  11  -3   1  373.46   16.00
 -11   4  -1    0.30    5.40
   4  11  -1    0.60    1.60
  11  -4  -1    0.30    1.40
  -4 -11  -1   -4.20    3.90
  11  -4   1    1.10    0.90
  -4 -11   1    2.40    4.50
 -11   4   1    3.30    6.90
   4  11   1    0.30    1.50
  11  -4   1    1.10    1.20
   5  11  -1   96.09    5.40
  11  -5  -1   87.89    5.20
  -5 -11  -1  100.09   12.40
 -11   5  -1   93.29   17.30
  -5 -11   1   82.59   11.30
  11  -5   1   84.39    4.70
  11  -5   1   84.59    4.30
 -11   5   1   85.89   16.30
   5  11   1   82.99    5.30
  -6 -11  -1    0.60    4.60
 -11   6  -1    1.70    7.50
   6  11  -1    1.90    1.90
  11  -6  -1    0.10    1.60
  11  -6   1    0.60    0.90
  11  -6   1   -0.30    1.10
 -11   6   1   -4.50    7.20
   6  11   1    0.00    1.60
  -6 -11   1   -1.10    4.20
 -11   7  -1   -8.50    8.40
   7  11  -1    0.70    1.70
  -7 -11  -1   -3.20    3.60
  11  -7  -1    2.50    1.70
   7  11   1    1.50    1.80
  11  -7   1    0.50    1.20
  -7 -11   1   -2.00    4.00
  11  -7   1    0.60    0.90
 -11   7   1    4.80    9.00
  11  -8  -1   -1.00    1.60
  -8 -11  -1    6.70    6.20
   8  11  -1    1.90    1.90
 -11   8  -1    8.10   11.80
  -8 -11   1   -2.80    4.40
  11  -8   1   -0.70    1.30
   8  11   1   -1.20    1.80
 -11   8   1   -3.20    8.80
  11  -9  -1  130.69   15.40
 -11   9  -1   52.09   18.40
  11  -9  -1  101.69    6.50
   9  11  -1  126.69    7.00
  -9 -11  -1  109.19   14.50
  11  -9   1  124.19   16.20
   9  11   1  110.29    6.80
  11  -9   1  108.89    6.00
  -9 -11   1  131.39   15.80
  11 -10  -1    2.10    2.20
  11 -10  -1   12.00    6.60
  10  11  -1    1.80    2.20
 -10 -11  -1    0.20    5.50
 -10 -11   1   -2.20    4.90
  10  11   1    5.20    2.30
  11 -10   1    3.10    6.10
  11 -10   1    2.00    1.60
  11  11  -1   18.50    3.40
 -11 -11  -1   22.90    9.20
  11 -11  -1   24.20    3.40
  11 -11  -1   18.50    7.50
 -11 -11   1   16.60    7.90
  11 -11   1   10.30    7.60
  11 -11   1   18.50    2.40
  11  11   1   17.90    3.20
 -12 -11  -1    5.70    7.20
  11 -12  -1   -1.50    6.00
  12  11  -1    0.40    2.40
  11 -12  -1   -0.40    2.10
  11 -12   1    3.50    6.70
 -12 -11   1    6.30    7.50
  12  11   1    1.20    2.60
  11 -12   1    2.10    1.70
 -12 -10  -1   23.60    9.60
  12  10  -1   49.80    4.80
  10 -12  -1   40.90    4.20
  10 -12  -1   55.49   10.30
 -12 -10   1   41.90    9.60
  10 -12   1   46.40   10.10
  12  10   1   42.30    4.30
  10 -12   1   42.90    3.70
   9 -12  -1   -0.90    1.80
   9 -12  -1    1.40    5.50
  12   9  -1    3.60    2.20
 -12  -9  -1    4.50    7.10
   9 -12   1    0.70    1.60
  12   9   1   -2.20    1.90
 -12  -9   1    0.70    5.60
   9 -12   1   -0.60    5.70
 -12  -8  -1   60.89   11.50
  12   8  -1   48.30    4.60
  -8  12  -1   61.89    4.10
  12   8   1   54.99    5.20
   8 -12   1   53.69   10.40
 -12  -8   1   67.39   11.80
  -8  12   1   59.09    4.70
  -7  12  -1    2.00    1.50
   7 -12  -1    7.90    5.00
 -12  -7  -1    4.20    6.20
 -12  -7   1    6.70    5.60
   7 -12   1    4.80    5.50
  -7  12   1    4.60    1.90
  12   7   1    3.30    2.10
  12   6  -1   23.70    3.20
   6 -12  -1   22.60    7.30
  -6  12  -1   28.90    2.80
   6 -12   1   29.10    8.30
  12   6   1   28.40    3.20
 -12  -6   1   14.10    6.40
  -6  12   1   21.40    2.80
 -12  -5  -1    3.10    6.00
  12   5  -1    2.10    2.00
  -5  12  -1    0.80    1.50
   5 -12  -1    7.30    4.50
  -5  12   1    5.60    1.90
 -12  -5   1    3.30    4.80
   5 -12   1    2.80    4.20
  12   5   1    3.40    1.80
  -4  12  -1   39.80    3.30
   4 -12  -1   56.99    9.30
  12   4  -1   42.90    3.90
 -12  -4  -1   39.50    9.40
 -12  -4   1   29.30    7.70
   4 -12   1   40.60    8.50
  -4  12   1   45.00    3.60
  12   4   1   41.40    3.60
  12   3  -1    3.70    2.00
   3 -12  -1    4.30    4.70
 -12  -3  -1    0.30    5.00
  -3  12  -1    5.20    1.60
 -12  -3   1    7.60    5.50
  -3  12   1    5.90    1.90
   3 -12   1   10.90    5.10
  12   3   1    5.10    1.80
  -2  12  -1   10.50    2.00
  12   2  -1   11.30    2.30
   2 -12  -1    7.10    4.30
 -12  -2  -1    8.10    6.10
 -12  -2   1    6.30    5.70
   2 -12   1   18.10    6.40
  12   2   1    8.00    1.80
  -2  12   1    9.70    1.90
  -1  12  -1    1.60    1.40
  12   1  -1    0.00    1.50
 -12  -1  -1   -1.30    4.20
   1 -12  -1    1.40    4.10
  12   1   1    0.50    1.20
   1 -12   1    5.10    4.70
 -12  -1   1    9.20    6.30
  -1  12   1   -0.70    1.50
   0  12  -1   37.00    3.20
   0 -12  -1   41.60    8.30
  12   0  -1   36.70    3.50
 -12   0  -1   39.00   10.40
   0  12   1   36.50    3.30
  12   0   1   36.10    3.00
   0 -12   1   34.30    7.50
 -12   0   1   22.70    7.10
   1  12  -1   -0.60    1.50
  -1 -12  -1    3.00    3.90
  12  -1  -1    2.20    1.60
 -12   1  -1    8.80    7.40
  -1 -12   1   -0.70    4.10
  12  -1   1   -0.30    1.30
   1  12   1    2.30    1.70
 -12   1   1    3.70    6.10
 -12   2  -1   -1.30    6.00
  -2 -12  -1    9.70    5.30
  12  -2  -1    9.60    2.10
   2  12  -1    9.30    2.00
 -12   2   1   -1.10    6.10
  12  -2   1    9.50    1.70
   2  12   1    7.70    1.90
  12  -2   1   10.30    1.40
  -2 -12   1   10.80    5.90
  -3 -12  -1    2.50    4.40
   3  12  -1    4.00    1.60
 -12   3  -1   -0.10    6.90
  12  -3  -1    3.60    1.70
   3  12   1    3.00    1.60
  12  -3   1    4.20    1.30
  12  -3   1    3.80    1.00
 -12   3   1    6.70    7.50
  -3 -12   1    6.80    5.20
   4  12  -1   43.30    3.70
  -4 -12  -1   42.40    8.70
 -12   4  -1   37.40   10.50
  12  -4  -1   42.90    3.70
   4  12   1   47.50    3.80
  -4 -12   1   45.80    9.40
  12  -4   1   38.30    2.60
 -12   4   1   29.60    9.30
  12  -4   1   39.00    3.10
 -12   5  -1    2.80    8.70
   5  12  -1    3.20    1.90
  -5 -12  -1    4.20    5.60
  12  -5  -1    1.00    1.70
   5  12   1    3.20    1.90
  -5 -12   1    8.60    5.70
 -12   5   1    1.70    7.30
  12  -5   1    3.50    1.40
  12  -5   1    2.30    0.90
 -12   6  -1   34.00   13.00
  12  -6  -1   27.10    3.00
   6  12  -1   21.80    3.50
  -6 -12   1   26.10    7.80
  12  -6   1   24.90    2.00
  12  -6   1   27.30    2.50
   6  12   1   18.60    3.20
 -12   6   1   15.50    9.00
  -7 -12  -1    3.80    4.90
  12  -7  -1   -0.20    1.80
   7  12  -1    2.60    2.10
 -12   7  -1  -18.60   12.70
   7  12   1    1.70    1.90
  -7 -12   1   -1.30    4.90
 -12   7   1    6.90   10.10
  12  -7   1    1.20    1.30
   8  12  -1   64.19    5.00
 -12   8  -1   30.90   15.90
  -8 -12  -1   50.49   10.00
  12  -8  -1   49.40    4.30
  -8 -12   1   59.49   10.70
 -12   8   1   53.89   17.60
   8  12   1   60.49    4.80
  12  -8   1   56.59    4.90
   9  12  -1    2.70    2.20
  12  -9  -1   12.50    5.50
  12  -9  -1    0.40    1.80
 -12   9  -1   -9.80   12.10
  -9 -12  -1    4.40    6.30
  12  -9   1    0.40    6.00
  -9 -12   1    7.90    6.20
   9  12   1    0.50    2.10
  12  -9   1    2.70    1.50
  10  12  -1   50.59    4.60
  12 -10  -1   42.40    4.10
  12 -10  -1   52.99   10.60
 -10 -12  -1   31.30    9.30
  12 -10   1   64.49   12.60
  12 -10   1   38.40    3.50
 -10 -12   1   47.50   10.80
  10  12   1   49.10    4.70
  12 -11  -1    7.10    6.70
  12 -11  -1   -1.70    1.90
 -11 -12  -1    4.40    6.90
  11  12  -1    0.20    2.50
  11  12   1   -2.00    2.40
 -11 -12   1   11.20    7.20
  12 -11   1   -0.40    6.70
  12 -11   1    4.40    1.90
  12 -12  -1    8.40    2.60
  12  12  -1    4.00    4.60
 -12 -12  -1    3.40    7.60
  12 -12  -1    0.70    6.40
  12 -12   1    5.40    8.70
 -12 -12   1    7.90    7.70
  12  12   1    4.40    2.80
 -13 -11  -1   -5.60    6.60
  11 -13  -1  -12.20    6.00
  11 -13  -1   -1.30    2.20
  11 -13   1   -4.20    7.00
 -13 -11   1    5.60    9.80
  11 -13   1    1.30    1.90
  13  11   1   -2.90    2.20
  13  10  -1    1.70    2.60
  10 -13  -1    5.00    5.90
  10 -13  -1    2.60    2.20
 -13 -10  -1    2.90    7.30
  10 -13   1    4.70    6.90
  13  10   1    3.90    2.40
 -13 -10   1   -3.50    6.80
  10 -13   1    1.00    1.80
  13   9  -1   62.99    5.40
   9 -13  -1   60.49    5.20
   9 -13  -1   69.79   12.60
 -13  -9  -1   57.39   12.60
  13   9   1   65.59    5.30
   9 -13   1   60.39    4.60
   9 -13   1   88.79   14.00
 -13  -9   1   66.69   12.20
  -8  13  -1    0.70    1.70
 -13  -8  -1    2.50    7.60
  13   8  -1    1.00    2.40
   8 -13  -1    5.90    5.40
 -13  -8   1   -0.60    6.00
   8 -13   1    4.70    5.80
  -8  13   1   -0.60    2.00
  13   8   1    0.20    2.10
 -13  -7  -1  158.58   19.70
  -7  13  -1  133.39    7.40
  13   7  -1  136.29    8.10
   7 -13  -1  157.78   15.10
 -13  -7   1  147.89   18.50
  -7  13   1  148.49    7.90
   7 -13   1  125.39   16.90
  13   7   1  137.69    8.60
  13   6  -1    1.70    2.10
 -13  -6  -1   10.20    7.30
  -6  13  -1    2.60    1.70
  13   6   1    2.60    2.00
 -13  -6   1   -8.30    4.50
  -6  13   1    3.50    1.90
   6 -13   1    6.60    6.60
  13   5  -1   26.30    3.40
  -5  13  -1   33.40    3.10
   5 -13  -1   39.70    8.60
 -13  -5  -1   58.39   11.90
  13   5   1   36.30    3.50
 -13  -5   1   35.80   11.50
   5 -13   1   24.90    7.90
  -5  13   1   34.30    3.40
   4 -13  -1    1.00    5.00
  -4  13  -1    3.30    1.80
 -13  -4  -1   -3.50    5.50
  13   4  -1    2.80    2.10
 -13  -4   1   -1.60    4.80
  -4  13   1    0.70    1.70
   4 -13   1    0.10    4.30
  13   4   1    1.80    1.90
   3 -13  -1  239.08   18.70
  13   3  -1  261.77   11.90
  -3  13  -1  237.38   11.30
 -13  -3  -1  270.17   22.50
   3 -13   1  260.77   19.50
  -3  13   1  230.78   11.50
  13   3   1  244.98   11.50
 -13  -3   1  202.88   18.90
  13   2  -1   -0.30    1.70
   2 -13  -1    5.60    4.20
  -2  13  -1   -1.50    1.40
 -13  -2  -1    5.90    5.90
 -13  -2   1   -0.40    5.70
   2 -13   1    1.10    4.70
  -2  13   1    2.60    1.80
  13   2   1    0.30    1.60
  13   1  -1  125.29    7.40
   1 -13  -1  122.99   14.60
  -1  13  -1  143.29    7.10
 -13  -1  -1  140.99   18.50
  -1  13   1  137.69    7.30
 -13  -1   1  131.29   16.60
  13   1   1  142.39    7.10
   1 -13   1  115.69   14.70
 -13   0  -1   -0.10    6.30
   0 -13  -1    1.80    4.90
  13   0  -1    1.50    1.80
   0  13  -1    4.80    1.70
  13   0   1    1.90    1.50
 -13   0   1    2.00    5.10
   0  13   1    2.70    1.80
   0 -13   1   12.90    5.70
  13  -1  -1  128.09    7.30
   1  13  -1  137.49    7.20
 -13   1  -1  147.29   20.00
  -1 -13  -1  120.59   13.00
  -1 -13   1  125.39   15.10
 -13   1   1  145.39   18.80
  13  -1   1  130.19    7.30
   1  13   1  138.89    7.20
  -2 -13  -1   -1.50    4.20
  13  -2  -1   -2.00    1.60
 -13   2  -1   -8.70    6.00
   2  13  -1    1.10    1.70
   2  13   1   -0.80    1.60
  13  -2   1   -0.30    1.30
 -13   2   1   11.30    7.20
  -2 -13   1   -2.10    3.80
  13  -3  -1  248.38   11.70
  -3 -13  -1  236.08   19.30
 -13   3  -1  243.28   24.80
   3  13  -1  250.87   11.70
 -13   3   1  221.38   22.90
  13  -3   1  239.78   11.10
   4  13  -1    0.70    1.90
  13  -4  -1   -0.40    1.70
  -4 -13  -1   -0.20    5.10
 -13   4  -1   11.90    9.00
   4  13   1    1.80    2.00
 -13   4   1   -3.00    7.40
  -4 -13   1    0.70    5.40
  13  -4   1   -0.10    1.30
 -13   5  -1   36.10   12.10
  13  -5  -1   27.40    3.20
  -5 -13  -1   40.50    9.50
   5  13  -1   31.90    3.40
   5  13   1   32.80    3.50
 -13   5   1   20.00   11.00
  -5 -13   1   27.00    8.10
  13  -5   1   34.60    2.90
   6  13  -1    0.40    2.00
 -13   6  -1    6.00   11.20
  -6 -13  -1    1.20    4.90
  13  -6  -1   -0.10    1.80
 -13   6   1    1.50   11.00
   6  13   1    1.50    2.10
  -6 -13   1    2.10    3.90
  13  -6   1    0.10    1.40
   7  13  -1  137.29    7.70
 -13   7  -1  117.89   21.80
  13  -7  -1  137.39    7.40
  -7 -13  -1  141.29   16.80
  13  -7   1  121.09    6.90
  -7 -13   1  124.49   15.60
 -13   7   1   69.49   24.00
   7  13   1  132.39    7.60
  -8 -13  -1    0.00    5.60
   8  13  -1    1.20    2.20
  13  -8  -1   -0.20    1.60
 -13   8  -1   -2.30   11.80
  -8 -13   1    1.20    5.80
  13  -8   1    1.10    1.50
   8  13   1    1.50    2.20
 -13   8   1   28.30   14.40
  13  -9  -1   58.99    4.90
  13  -9  -1   63.99   12.30
 -13   9  -1   36.80   17.70
  -9 -13  -1   58.69   11.90
   9  13  -1   66.99    5.40
  -9 -13   1   51.49   11.30
   9  13   1   74.49    5.60
  13  -9   1   68.49    4.30
  10  13  -1    0.30    2.60
 -10 -13  -1   -8.80    5.90
  13 -10  -1    3.60    2.10
  13 -10  -1   -0.50    6.20
  13 -10   1   -0.10    7.40
 -10 -13   1    9.60    8.20
  13 -10   1   -1.30    1.50
  10  13   1   -2.80    2.10
 -11 -13  -1   -0.40    7.60
  13 -11  -1    0.80    7.30
  11  13  -1   -1.70    2.30
  13 -11  -1    4.40    2.30
 -11 -13   1   -5.90    6.40
  11  13   1   -6.60    4.10
  13 -11   1  -13.40    6.60
  10 -14  -1    1.00    2.30
 -14 -10  -1    1.30    7.60
  10 -14  -1    3.50    7.00
  14  10   1    3.00    2.30
 -14 -10   1   11.70    8.40
  10 -14   1    3.00    2.30
   9 -14  -1    0.60    2.30
  14   9  -1    3.10    2.60
   9 -14  -1  -11.60    5.80
 -14  -9  -1   -3.50    8.20
   9 -14   1   -0.60    1.80
  14   9   1    1.20    2.50
   9 -14   1   -3.60    6.50
 -14  -9   1   -2.50    7.70
 -14  -8  -1   11.50    8.50
   8 -14  -1    3.90    6.40
  14   8  -1   13.10    3.20
  -8  14  -1   21.20    2.80
 -14  -8   1   19.80    8.10
  -8  14   1   14.80    2.80
   8 -14   1   13.40    7.50
  14   8   1   10.70    2.90
   7 -14  -1   -6.10    4.30
 -14  -7  -1   -7.60    6.60
  14   7  -1    0.70    2.30
  -7  14  -1   -0.50    1.70
   7 -14   1   -2.40    5.70
  -7  14   1    2.80    2.20
 -14  -7   1    0.70    6.30
  14   7   1   -0.80    2.10
  -6  14  -1  127.19    7.00
 -14  -6  -1  101.49   16.20
  14   6  -1  130.69    7.70
   6 -14  -1  119.79   15.10
  14   6   1  122.89    7.30
  -6  14   1  127.99    7.30
 -14  -6   1  104.79   15.60
   6 -14   1  120.69   15.90
 -14  -5  -1   -8.80    6.80
  -5  14  -1    1.40    1.70
   5 -14  -1    1.10    5.30
  14   5  -1    0.50    2.00
   5 -14   1    4.10    5.90
  -5  14   1   -1.20    1.60
 -14  -5   1   -0.90    5.80
  14   5   1   -0.50    1.70
  -4  14  -1    6.20    2.10
  14   4  -1    7.10    2.40
   4 -14  -1   11.90    6.80
 -14  -4  -1   14.30    7.50
 -14  -4   1   10.80    7.70
  -4  14   1    8.70    2.40
  14   4   1   13.00    2.50
   4 -14   1   10.00    7.20
   3 -14  -1   -4.90    5.20
  -3  14  -1    1.00    1.60
 -14  -3  -1    8.00    7.90
  14   3  -1    0.60    1.80
  14   3   1    0.40    1.60
   3 -14   1   -1.40    5.20
  -3  14   1   -0.90    1.60
 -14  -3   1    3.60    6.60
  -2  14  -1   27.70    3.10
 -14  -2  -1   31.50   10.50
  14   2  -1   34.30    3.70
   2 -14  -1   35.90    8.50
   2 -14   1   29.80    9.00
  -2  14   1   36.90    3.50
  14   2   1   33.50    3.30
 -14  -1  -1    0.40    7.50
  14   1  -1   -0.90    1.80
  -1  14  -1    0.70    1.80
   1 -14  -1   -0.30    4.30
  -1  14   1    1.50    1.80
  14   1   1    1.00    1.60
   1 -14   1    0.10    5.30
 -14  -1   1    0.40    7.30
   0 -14  -1  234.18   18.60
  14   0  -1  195.98   10.50
 -14   0  -1  167.78   22.00
   0  14  -1  203.18   10.80
   0  14   1  216.48   10.50
 -14   0   1  226.48   21.30
  14   0   1  225.78   10.20
   0 -14   1  224.08   18.60
 -14   1  -1   12.10    7.60
  -1 -14  -1    2.20    5.70
   1  14  -1    1.60    1.80
  14  -1  -1   -1.50    1.60
  14  -1   1    1.70    1.50
 -14   1   1    3.00    5.80
  -1 -14   1   -1.10    5.30
   1  14   1    0.90    1.90
  -2 -14  -1   25.90    7.90
   2  14  -1   32.40    3.30
 -14   2  -1   40.10   12.30
  14  -2  -1   32.90    3.50
  -2 -14   1   32.00    9.10
 -14   2   1   28.70   10.30
  14  -2   1   30.50    2.90
   2  14   1   23.80    3.10
 -14   3  -1   -7.80    7.20
   3  14  -1    0.30    2.00
  14  -3  -1    0.20    1.80
  -3 -14  -1    0.80    5.30
  -3 -14   1    3.90    5.60
   3  14   1    0.30    1.90
  14  -3   1   -1.30    1.50
 -14   3   1   -6.70    7.30
 -14   4  -1   28.00   11.20
   4  14  -1    9.10    2.40
  14  -4  -1   11.70    2.40
  -4 -14  -1    3.40    5.60
   4  14   1    8.50    2.40
  14  -4   1    9.80    3.10
  -4 -14   1   11.30    7.30
   5  14  -1   -0.40    2.00
  -5 -14  -1   -4.40    5.50
 -14   5  -1    9.20    9.90
  14  -5  -1   -0.50    1.80
 -14   5   1    4.60    8.80
  -5 -14   1    3.40    6.10
   5  14   1   -2.80    1.90
   6  14  -1  139.19    7.50
 -14   6  -1  119.99   24.00
  14  -6  -1  116.79    7.00
  -6 -14  -1   97.29   14.50
  -6 -14   1  157.18   15.80
 -14   6   1   98.79   21.40
  14  -6   1  110.39    7.80
   6  14   1  119.79    7.30
   7  14  -1   -0.10    2.30
  -7 -14  -1   -2.30    6.00
  14  -7  -1    3.70    2.20
 -14   7  -1  -15.00   11.50
  14  -7   1    0.50    1.50
 -14   7   1   -7.40   12.20
   7  14   1   -0.10    2.40
  -7 -14   1   10.30    6.50
  14  -8  -1   12.30    2.60
 -14   8  -1   -3.70   12.80
   8  14  -1   11.70    2.90
  -8 -14  -1    8.60    7.50
  14  -8   1   14.10    2.10
 -14   8   1   11.30   16.90
  -8 -14   1   20.10    7.90
   8  14   1   15.30    3.10
  -9 -14  -1   -0.80    6.50
 -14   9  -1   23.70   16.10
  14  -9  -1   -0.40    6.40
  14  -9  -1   -1.90    2.00
   9  14  -1    0.70    2.90
   9  14   1    2.60    2.60
  -9 -14   1    9.00    8.00
  14 -10  -1   -5.80    6.90
 -10 -14  -1   -7.60    5.90
  10  14  -1    5.40    2.90
  14 -10  -1    1.20    2.20
  10  14   1    5.00    2.80
 -10 -14   1    4.90    6.60
  14 -10   1    5.20   12.10
  -8  15  -1    0.80    2.10
 -15  -8  -1   -7.80    8.00
   8 -15  -1    7.10    7.00
  15   8  -1   -0.70    2.50
   8 -15   1   -1.50    8.00
  15   8   1    5.70    2.50
 -15  -8   1   -3.20    7.60
  -8  15   1    0.60    2.10
 -15  -7  -1   15.70    8.50
  -7  15  -1   10.70    2.50
   7 -15  -1   15.20    7.80
  15   7  -1   15.90    3.50
  -7  15   1   10.20    2.70
 -15  -7   1    7.70    8.90
   7 -15   1   15.10    7.80
  15   7   1    9.90    2.80
 -15  -6  -1    7.60    8.00
  15   6  -1    1.60    2.50
  -6  15  -1   -3.30    1.70
   6 -15  -1    2.80    6.40
  -6  15   1   -0.50    2.10
   6 -15   1    0.80    5.20
 -15  -6   1    4.60    8.20
  15   6   1    1.40    2.10
  -5  15  -1   11.90    2.50
 -15  -5  -1   16.90    9.20
  15   5  -1   12.20    2.90
   5 -15  -1    8.90    7.10
 -15  -5   1    4.30    7.30
  -5  15   1   16.20    2.90
  15   5   1    9.60    2.60
   5 -15   1   15.30    7.20
   4 -15  -1   -0.70    5.30
  -4  15  -1   -0.20    1.90
  15   4  -1   -0.50    2.20
 -15  -4  -1    5.20    7.60
  -4  15   1    0.50    2.10
   4 -15   1   -5.80    5.40
 -15  -4   1    5.50    8.40
  15   4   1    0.20    2.10
   3 -15  -1   15.30    7.50
 -15  -3  -1   10.60    8.20
  -3  15  -1   11.50    2.50
  15   3  -1   10.80    2.70
 -15  -3   1   18.80    8.80
   3 -15   1   13.10    7.70
  -3  15   1   11.20    2.70
  15   3   1   13.20    2.60
 -15  -2  -1    0.90    6.90
  -2  15  -1   -0.50    1.80
   2 -15  -1    1.70    6.50
  15   2  -1   -2.10    2.00
   2 -15   1   -0.50    6.30
  -2  15   1   -0.10    2.00
  15   2   1    0.30    1.80
 -15  -2   1   -1.60    6.90
  -1  15  -1   -1.10    1.90
  15   1  -1    0.80    2.20
   1 -15  -1    1.20    6.10
 -15  -1  -1    5.80    8.80
   1 -15   1   -2.00    5.50
  15   1   1   -1.10    1.70
 -15  -1   1   -8.70    6.40
  -1  15   1    0.80    2.10
   0 -15  -1    4.60    5.80
 -15   0  -1    2.30    8.30
  15   0  -1    0.80    2.00
   0  15  -1   -0.90    2.00
   0 -15   1    1.40    6.50
   0  15   1    1.30    2.10
  15   0   1    1.20    1.70
 -15   0   1   -0.80    7.20
 -15   1  -1    6.20    8.10
  -1 -15  -1    6.70    5.50
   1  15  -1    2.60    2.00
  15  -1  -1   -0.20    1.80
   1  15   1   -0.70    1.90
  -1 -15   1   10.10    5.80
  15  -1   1    1.80    1.60
 -15   1   1    6.70    8.30
   2  15  -1   -4.80    1.80
 -15   2  -1    6.30   11.00
  -2 -15  -1    3.10    6.40
  15  -2  -1    5.10    2.00
   2  15   1    1.60    2.10
  -2 -15   1   -2.30    5.90
 -15   2   1   -0.70    9.00
  15  -2   1   -0.90    1.60
  15  -3  -1    9.40    2.40
   3  15  -1    8.90    2.50
  -3 -15  -1   13.40    7.10
 -15   3  -1    8.80    9.20
  -3 -15   1   17.20    7.50
  15  -3   1   15.10    2.20
 -15   3   1    5.60   10.00
   3  15   1   11.40    2.80
 -15   4  -1   -0.30   10.30
  -4 -15  -1   -2.00    5.40
  15  -4  -1    0.70    1.90
   4  15  -1    4.00    2.20
   4  15   1    0.40    2.00
 -15   4   1   -8.10    9.50
  15  -4   1   -1.30    1.40
  -4 -15   1   -0.90    6.00
  15  -5  -1   13.10    2.60
 -15   5  -1    5.40   12.60
  -5 -15  -1   24.30    8.60
   5  15  -1   12.50    2.80
  15  -5   1    9.60    2.00
 -15   5   1   17.60   14.20
   5  15   1   14.10    2.80
  -5 -15   1   14.00    8.40
  -6 -15  -1    0.60    6.10
   6  15  -1    0.70    2.40
 -15   6  -1  -25.70   11.10
  15  -6  -1   -0.60    1.90
   6  15   1    0.30    2.10
  15  -6   1   -1.50    1.50
  -6 -15   1   -4.00    5.60
 -15   6   1   -2.80   13.10
   7  15  -1   10.90    2.80
  -7 -15  -1   13.20    7.60
 -15   7  -1    1.40   14.30
  15  -7  -1   10.70    2.50
 -15   7   1    9.00   14.90
   7  15   1   23.60    3.50
  -7 -15   1   16.40    8.40
   8  15  -1    2.50    2.50
  15  -8  -1    0.90    2.60
 -15   8  -1   -6.50   14.30
  -8 -15  -1    2.90    7.50
 -15   8   1   -0.60   16.60
   8  15   1    1.50    2.40
  -8 -15   1   -3.80    7.30
   6 -16  -1   48.10   11.10
  16   6  -1   52.09    5.10
 -16  -6  -1   29.60   11.80
   6 -16   1   57.39   19.50
  -6  16   1   49.90    4.70
  16   6   1   44.10    4.40
 -16  -6   1   33.70   11.60
  -5  16  -1    3.20    2.10
 -16  -5  -1   -2.80    9.50
   5 -16  -1    2.00    6.50
  16   5  -1    0.00    2.40
 -16  -5   1   -0.40    8.90
  16   5   1   -1.70    2.10
  -5  16   1    0.70    2.10
   5 -16   1   -2.60    6.70
  16   4  -1   61.39    5.30
   4 -16  -1   61.19   12.20
 -16  -4  -1   72.79   14.10
  -4  16  -1   66.49    5.10
  16   4   1   62.39    5.00
 -16  -4   1   58.29   13.70
   4 -16   1   35.80   10.70
  -4  16   1   52.69    4.90
  16   3  -1   -1.40    2.10
  -3  16  -1    3.90    2.30
   3 -16  -1    3.80    7.00
 -16  -3  -1   -1.30    8.90
   3 -16   1    4.70    6.80
  16   3   1    4.90    3.90
 -16  -3   1   17.00    8.70
  -3  16   1    3.90    2.30
 -16  -2  -1   12.70    9.90
   2 -16  -1   30.30    8.10
  -2  16  -1   38.90    3.90
  16   2  -1   24.10    3.40
  -2  16   1   31.80    3.80
  16   2   1   32.40    3.50
 -16  -2   1   15.70    9.30
   2 -16   1   20.10    8.40
 -16  -1  -1   -3.40    7.90
  16   1  -1    1.40    2.20
  -1  16  -1   -0.70    2.00
   1 -16  -1    3.20    6.60
  -1  16   1    0.70    2.20
 -16  -1   1   -9.00    7.30
  16   1   1    0.40    1.90
   1 -16   1    0.50    6.30
   0  16  -1  103.89    6.50
   0 -16  -1  116.09   15.90
 -16   0  -1   89.09   16.10
  16   0  -1  100.79    6.70
 -16   0   1  130.09   20.90
  16   0   1   92.89    6.00
   0 -16   1  123.79   16.00
   0  16   1  109.39    6.70
  -1 -16  -1    4.10    7.10
   1  16  -1    0.20    2.10
 -16   1  -1  -15.20    7.40
 -16   1   1    6.00    8.70
  16  -1   1   -0.30    1.70
   1  16   1   -1.60    2.20
  -1 -16   1   10.20    6.90
  16  -2  -1   23.40    3.40
  -2 -16  -1   21.40    9.10
   2  16  -1   39.50    3.90
 -16   2  -1   29.50   12.30
  16  -2   1   28.20    3.00
 -16   2   1   23.50   13.90
  -2 -16   1   39.80   10.30
   2  16   1   32.70    4.00
 -16   3  -1   -4.70    9.80
   3  16  -1    0.40    2.20
  16  -3  -1    0.40    2.00
  -3 -16  -1   14.60    8.00
  -3 -16   1    1.60    6.70
 -16   3   1   18.20   15.00
  16  -3   1    1.50    1.70
   3  16   1    2.80    2.40
 -16   4  -1   38.30   16.20
  16  -4  -1   57.19    5.00
   4  16  -1   54.39    5.10
  -4 -16  -1   75.49   13.40
  -4 -16   1   62.29   12.00
  16  -4   1   56.59    5.00
   4  16   1   73.39    5.50
 -16   4   1   36.20   15.40
 -16   5  -1  -33.80   12.40
  -5 -16  -1    0.80    6.30
   5  16  -1    0.10    2.80
  16  -5  -1    1.40    2.10
 -16   5   1  -13.40   12.60
  -6 -16  -1   38.30   11.30
 -16   6  -1   47.10   20.70
   6  16  -1   52.69    5.00
  -6 -16   1   59.39   12.40
 -16   6   1   36.30   19.70
   6  16   1   50.29    4.80
   2 -17  -1   -2.00    6.10
  -2  17  -1    1.70    2.10
  17   2  -1    0.00    2.30
 -17  -2  -1  -11.30   12.60
   2 -17   1    0.10    6.40
 -17  -2   1   -6.10   10.90
  17   2   1    1.90    2.20
  -2  17   1    1.50    2.30
  17   1  -1    2.10    2.40
  -1  17  -1    4.00    2.40
   1 -17  -1    3.30    7.30
  17   1   1    9.20    2.50
 -17  -1   1    5.40   11.80
   1 -17   1    1.70    7.70
  -1  17   1   13.30    3.00
   0  17  -1    1.00    2.20
 -17   0  -1   -1.50   10.80
   0 -17  -1    3.70    7.90
  17   0  -1   -1.30    2.10
  17   0   1   -2.20    1.80
   0  17   1   -0.60    2.30
   0 -17   1   -0.80    7.50
 -17   0   1   13.50   12.10
  -1 -17  -1    8.80   14.50
  17  -1  -1   10.40    2.70
   1  17  -1    7.30    2.60
 -17   1  -1  -29.50   10.20
 -17   1   1   20.40   12.00
  17  -1   1    6.00    2.10
  -1 -17   1    9.30    7.90
  -2 -17  -1   -3.60    8.70
   2  17  -1   -2.70    2.60
  17  -2  -1   -0.70    2.20
  -2 -17   1  -15.60    6.00
 -17   2   1   -8.60   12.20
   2  17   1   -2.20    2.30
   0   0  -2 3377.06  145.49
   0   0   2 3713.53  144.89
   1   0  -2   63.39    3.10
   0   1  -2   60.39    2.90
   0  -1  -2   66.09    2.90
  -1   0  -2   64.89    2.80
  -1   0  -2   62.29    4.50
   1   0  -2   59.59    3.00
   0  -1  -2   58.79    3.30
  -1   0   2   68.79    3.10
   0   1   2   66.69    3.30
   0   1   2   68.59    2.90
   0  -1   2   63.29    3.90
   0  -1   2   60.59    2.90
   1   0   2   66.19    2.80
  -1   0   2   62.79    3.00
   0  -1   2   63.79    5.60
  -1   0   2   67.09    3.90
   1   0   2   63.19    4.20
  -1   1  -2 1271.07   51.29
   1   1  -2 1284.47   52.39
  -1   1  -2 1279.37   55.49
   1   1  -2 1272.07   51.49
  -1  -1  -2 1278.17   52.69
   1  -1  -2 1280.67   51.49
   1   1   2 1196.88   52.39
  -1  -1   2 1305.17   52.29
   1  -1   2 1217.28   51.29
  -1  -1   2 1239.58   51.49
  -1   2  -2   48.30    7.50
  -2  -1  -2   48.40    3.80
  -1   2  -2   46.40    2.10
   2   1  -2   44.70    3.00
  -2  -1  -2   48.20    2.10
   1  -2  -2   41.70    2.60
   1  -2  -2   46.30    2.30
   2   1  -2   44.70    2.30
   2   1   2   45.70    3.50
  -2  -1   2   42.50    2.30
  -1   2   2   45.00    2.30
   2   1   2   42.70    2.00
   1  -2   2   50.49    6.60
  -1   2   2   41.90    2.70
   1  -2   2   43.40    2.10
  -2  -1   2   46.50    3.10
   2   0  -2 2483.65  107.59
   0  -2  -2 2572.94  107.99
  -2   0  -2 2516.05  109.89
   0  -2   2 2653.23  109.19
   0   2   2 2559.64  107.99
   2   0   2 2724.83  109.49
  -2   0   2 2892.01  107.69
   0  -2   2 2723.63  113.19
  -2   1  -2   47.00    5.60
   2  -1  -2   45.20    2.40
  -2   1  -2   46.20    1.90
   2  -1  -2   48.70    2.40
   1   2  -2   46.60    2.30
   2  -1  -2   48.50    2.50
   1   2  -2   46.20    3.50
  -1  -2  -2   44.70    2.20
  -2   1  -2   46.20    1.90
  -1  -2  -2   48.80    3.40
  -1  -2   2   43.70    3.40
   2  -1   2   44.10    4.40
   1   2   2   46.40    2.20
  -2   1   2   47.70    3.20
  -1  -2   2   46.00    2.30
  -2   2  -2  280.57   12.00
   2  -2  -2  309.67   13.10
   2  -2  -2  279.97   14.00
   2  -2  -2  296.97   12.40
   2   2  -2  300.67   12.40
  -2  -2  -2  289.87   12.20
  -2   2  -2  291.57   17.90
   2   2  -2  326.97   14.00
  -2  -2  -2  285.47   14.10
  -2  -2   2  280.97   12.40
   2   2   2  284.47   12.20
   2  -2   2  325.57   17.20
   2   2   2  297.47   13.90
   2  -2   2  282.17   12.00
  -2   2   2  291.87   12.40
  -2   3  -2  144.89    6.00
   3   2  -2  148.09    8.00
   2  -3  -2  142.39    7.60
   2  -3  -2  145.39    6.40
  -2   3  -2  144.59   12.80
   3   2  -2  152.68    6.50
  -3  -2  -2  144.39    6.20
  -3  -2  -2  147.59    8.70
   2  -3  -2  137.59   10.00
  -2   3   2  137.79    6.40
  -3  -2   2  152.48    8.10
   2  -3   2  140.49   11.60
  -3  -2   2  134.29    6.40
   2  -3   2  144.19    6.10
   3   2   2  146.69    8.30
   3   2   2  144.19    6.20
   3   1  -2 1350.76   55.89
  -1   3  -2 1301.27   55.49
   1  -3  -2 1375.86   55.69
  -3  -1  -2 1404.86   55.49
   3   1  -2 1274.97   56.99
  -3  -1  -2 1381.06   58.59
   1  -3  -2 1345.47   56.79
  -1   3   2 1349.56   56.99
   1  -3   2 1472.05   63.99
   1  -3   2 1323.97   55.69
  -3  -1   2 1352.76   56.99
   3   1   2 1358.46   55.49
   3   1   2 1369.26   57.99
   1  -3   2 1389.36   58.59
  -3  -1   2 1370.26   55.79
  -1   3   2 1456.65   55.79
   3   0  -2   25.70    2.10
  -3   0  -2   25.10    1.10
   3   0  -2   25.40    1.60
   0  -3  -2   23.70    1.40
   0   3  -2   23.20    1.40
  -3   0  -2   23.30    3.40
   0  -3  -2   25.40    2.40
   0   3  -2   23.60    3.30
  -3   0   2   22.80    2.20
   0   3   2   25.00    2.30
   0  -3   2   22.10    1.40
   0   3   2   23.60    1.50
   0  -3   2   24.60    3.40
  -3   0   2   20.20    1.50
   3   0   2   23.30    1.10
   3   0   2   19.50    3.10
   3  -1  -2 1367.06   56.29
  -1  -3  -2 1400.56   57.89
  -3   1  -2 1321.47   60.49
   1   3  -2 1358.86   58.39
   1   3  -2 1362.66   56.19
   3  -1  -2 1456.15   57.09
  -1  -3  -2 1319.47   56.09
   1   3   2 1363.36   57.79
  -1  -3   2 1367.16   56.19
  -3   1   2 1392.26   57.79
   3  -1   2 1443.66   59.89
  -3   1   2 1344.67   56.19
  -1  -3   2 1392.36   58.29
  -2  -3  -2  142.99    6.20
  -2  -3  -2  132.49    8.10
   3  -2  -2  150.58    6.40
  -3   2  -2  127.69   10.80
   3  -2  -2  140.99    7.80
   2   3  -2  139.69    6.30
   2   3  -2  157.48    8.40
   3  -2  -2  138.49    6.40
  -2  -3   2  138.79    8.10
  -3   2   2  144.89    9.30
   2   3   2  153.48    8.20
   2   3   2  138.89    6.20
  -2  -3   2  142.49    6.30
   3  -2   2  142.89   10.20
  -3   3  -2 3212.08  147.29
  -3  -3  -2 3428.16  141.39
   3  -3  -2 3396.16  142.19
   3   3  -2 3417.86  140.89
   3   3   2 3481.35  140.99
  -3  -3   2 3258.77  140.79
   3  -3   2 3655.73  145.99
   3  -4  -2    0.50    0.60
  -4  -3  -2   -0.20    1.50
   4   3  -2    0.50    0.70
   3  -4  -2    0.80    1.20
  -3   4  -2    0.60    0.30
   3  -4  -2    2.40    2.30
  -4  -3  -2    1.10    0.60
   4   3  -2    0.00    1.30
  -3   4  -2   -2.10    3.60
   4   3   2    0.30    0.50
  -4  -3   2    1.00    1.50
   4   3   2    0.40    1.30
   3  -4   2    2.10    3.00
  -3   4   2    0.70    0.70
  -4  -3   2    1.20    0.70
   3  -4   2    0.80    0.40
   4   2  -2  292.77   15.30
   4   2  -2  308.57   13.50
  -4  -2  -2  331.47   16.70
   2  -4  -2  311.67   19.20
   2  -4  -2  313.47   13.30
   2  -4  -2  304.57   15.10
  -2   4  -2  309.27   13.00
  -4  -2  -2  318.37   13.20
  -4  -2   2  327.37   13.50
  -2   4   2  311.47   13.40
   2  -4   2  308.97   16.80
   2  -4   2  330.37   13.10
   4   2   2  315.27   13.10
   4   2   2  303.17   15.80
   2  -4   2  350.66   21.90
   4   1  -2  127.79    5.90
  -4  -1  -2  130.49    5.50
  -1   4  -2  127.69    5.50
   1  -4  -2  115.49    7.10
   4   1  -2  115.79    7.10
   1  -4  -2  130.09    5.70
  -4  -1  -2  125.89    8.60
  -1   4   2  119.49    7.30
  -4  -1   2  131.09    7.40
   1  -4   2  137.49    8.70
   4   1   2  129.79    8.10
  -4  -1   2  125.79    5.80
   1  -4   2  103.79   11.20
  -1   4   2  131.79    5.80
   4   1   2  127.49    5.50
   1  -4   2  137.09    5.60
   4   0  -2  876.11   37.40
  -4   0  -2  933.11   36.90
  -4   0  -2  909.01   41.30
   0   4  -2  896.41   40.30
   0   4  -2  844.32   37.10
   4   0  -2 1008.80   38.90
   0  -4  -2  890.41   37.20
   0  -4  -2  903.41   39.20
   0  -4   2  894.41   40.10
   4   0   2  910.21   36.90
  -4   0   2  842.32   39.50
  -4   0   2  904.11   37.30
   4   0   2  933.01   40.60
   0   4   2  892.91   37.20
   0  -4   2  960.90   37.20
   0   4   2  908.91   39.20
   1   4  -2  143.89    5.80
   4  -1  -2  117.29    6.90
  -4   1  -2  144.89   10.10
  -1  -4  -2  128.59    5.70
  -1  -4  -2  123.49    7.60
   1   4  -2  123.89    8.10
  -4   1  -2  127.79    5.20
   4  -1  -2  124.79    5.90
   4  -1   2  128.59    5.20
  -1  -4   2  122.89    7.90
  -1  -4   2  116.89    5.70
   1   4   2  125.09    5.70
   1   4   2  132.39    7.60
  -4   1   2  118.49    8.40
  -4   1   2  130.99    5.80
   4  -1   2  129.69    9.00
   2   4  -2  312.87   13.50
   4  -2  -2  315.17   15.40
   2   4  -2  313.07   16.10
  -2  -4  -2  318.37   16.00
  -2  -4  -2  312.67   13.40
   4  -2  -2  321.17   13.50
  -4   2  -2  315.37   19.40
   4  -2  -2  319.27   13.60
   4  -2   2  322.07   18.10
   2   4   2  316.67   15.70
  -4   2   2  314.67   17.00
  -2  -4   2  311.47   15.90
  -2  -4   2  328.77   13.60
   2   4   2  321.87   13.40
  -4   3  -2    1.90    3.60
   4  -3  -2    0.50    1.50
   4  -3  -2    1.30    0.80
   4  -3  -2    0.80    0.60
   3   4  -2   -0.30    0.60
  -3  -4  -2    0.80    1.50
   3   4  -2    1.20    1.40
  -3  -4  -2    0.10    0.50
  -3  -4   2   -0.10    0.60
   3   4   2    1.00    0.60
  -4   3   2    0.00    2.30
   4  -3   2    2.70    2.90
  -3  -4   2    1.40    1.70
   4  -3   2    0.40    0.20
   4  -3   2    0.60    0.30
   3   4   2    0.10    1.40
  -4   4  -2  332.17   25.30
  -4   4  -2  385.56   16.20
   4   4  -2  390.06   16.80
   4   4  -2  379.36   19.50
   4  -4  -2  387.66   19.30
  -4  -4  -2  398.96   20.30
   4  -4  -2  394.36   16.60
   4  -4  -2  402.06   21.40
  -4  -4  -2  388.76   16.50
   4   4   2  401.16   19.80
  -4   4   2  414.96   24.40
   4  -4   2  403.66   26.30
  -4  -4   2  400.16   17.10
   4   4   2  401.76   16.50
  -4   4   2  395.26   16.70
   4  -4   2  400.06   16.20
  -4  -4   2  389.96   19.70
   4  -5  -2   29.00    2.00
  -4   5  -2   36.20    8.60
  -4   5  -2   28.10    1.60
   4  -5  -2   30.40    4.40
  -5  -4  -2   25.80    4.80
   5   4  -2   24.30    2.20
   5   4  -2   32.50    4.70
   4  -5  -2   27.80    6.10
  -5  -4  -2   30.20    2.00
  -5  -4   2   32.30    4.70
   4  -5   2   30.40    1.60
   5   4   2   28.30    1.90
   4  -5   2   36.30    8.50
  -5  -4   2   28.10    2.10
   5   4   2   28.90    4.40
  -4   5   2   26.60    2.10
   5   3  -2  776.12   36.90
  -5  -3  -2  830.92   34.00
   3  -5  -2  821.82   42.00
   3  -5  -2  834.72   37.10
  -3   5  -2  818.92   33.70
   3  -5  -2  842.72   34.00
   5   3  -2  815.62   34.30
  -5  -3  -2  825.72   38.40
  -5  -3   2  769.72   37.00
   5   3   2  836.12   33.90
   3  -5   2  784.52   33.80
   3  -5   2  844.12   38.90
  -5  -3   2  846.82   34.70
   3  -5   2  915.91   49.00
   5   3   2  800.62   38.80
  -3   5   2  866.71   34.20
  -5  -2  -2    2.30    2.10
   2  -5  -2    3.20    3.30
  -2   5  -2    0.90    0.40
   2  -5  -2    0.30    1.30
   2  -5  -2    1.30    0.60
  -5  -2  -2    1.90    0.60
   5   2  -2    0.70    1.40
   5   2  -2   -0.10    0.80
   2  -5   2    0.50    0.50
   5   2   2    2.70    2.00
   2  -5   2    2.50    2.30
   2  -5   2    1.40    4.10
   5   2   2   -0.20    0.50
  -5  -2   2    1.70    1.60
  -2   5   2    0.70    0.70
  -5  -2   2    0.90    0.70
  -5  -1  -2   77.99    6.80
  -1   5  -2   75.39    3.50
  -5  -1  -2   75.39    3.50
   1  -5  -2   74.59    3.70
   5   1  -2   82.39    4.00
   5   1  -2   84.99    5.70
   1  -5  -2   74.89    5.60
   1  -5   2   79.69   11.80
  -1   5   2   79.99    3.80
   1  -5   2   75.79    3.60
   5   1   2   75.09    3.40
   5   1   2   69.59    6.00
  -5  -1   2   58.79    5.40
   1  -5   2   72.09    6.50
  -1   5   2   71.09    5.60
  -5  -1   2   79.09    3.90
   5   0  -2  204.08   10.60
   0   5  -2  212.28    8.70
   0   5  -2  199.08   12.00
   0  -5  -2  194.68    8.70
  -5   0  -2  199.38   13.00
  -5   0  -2  209.98    8.50
   5   0  -2  203.78    9.00
   0  -5  -2  211.28   11.20
   0  -5   2  195.38   11.80
  -5   0   2  209.28    8.90
   0   5   2  192.98    8.80
   5   0   2  200.68    8.40
  -5   0   2  210.58   11.20
   5   0   2  194.18   12.00
   0  -5   2  181.68    8.70
   0   5   2  201.98   11.10
   1   5  -2   71.09    6.30
   5  -1  -2   90.19    5.70
   1   5  -2   81.89    3.90
  -1  -5  -2   78.89    6.00
  -1  -5  -2   83.09    3.90
  -5   1  -2   78.49    3.40
  -5   1  -2   84.69    8.10
   5  -1  -2   80.89    4.10
   1   5   2   77.99    3.90
   5  -1   2   77.69    3.40
   5  -1   2   78.19    6.90
  -1  -5   2   75.99    3.90
   1   5   2   79.19    6.00
  -1  -5   2   79.49    6.30
  -5   1   2   80.99    3.90
  -5   1   2   73.99    6.20
  -5   2  -2   -0.70    2.70
   2   5  -2   -0.60    1.50
   5  -2  -2    1.70    0.70
   5  -2  -2    0.80    1.30
   2   5  -2    0.20    0.70
  -2  -5  -2    0.60    0.60
   5  -2  -2    0.00    0.80
  -2  -5  -2    1.40    1.60
  -2  -5   2    4.00    2.20
  -2  -5   2    1.00    0.70
  -5   2   2    1.90    1.90
   5  -2   2    0.50    0.20
   2   5   2    0.40    0.70
   2   5   2    0.70    1.50
   5  -2   2    0.70    0.30
   5  -2   2    0.90    2.20
  -3  -5  -2  805.82   33.90
  -5   3  -2  767.22   42.40
   3   5  -2  805.52   37.40
   5  -3  -2  825.72   34.00
  -3  -5  -2  785.72   37.40
   5  -3  -2  809.02   37.30
   3   5  -2  810.42   34.00
   5  -3  -2  823.82   34.10
  -3  -5   2  803.62   37.40
   5  -3   2  863.51   41.10
   3   5   2  793.22   33.80
   5  -3   2  827.92   33.40
   5  -3   2  807.12   33.40
   3   5   2  830.02   37.20
  -5   3   2  829.22   40.50
  -3  -5   2  933.71   34.90
   5  -4  -2   27.50    2.20
  -4  -5  -2   31.00    2.30
  -4  -5  -2   29.10    5.20
  -5   4  -2   22.60    7.20
   4   5  -2   31.10    2.30
   5  -4  -2   20.00    4.30
   4   5  -2   29.50    4.60
   5  -4   2   26.70    1.50
  -4  -5   2   22.00    4.30
   5  -4   2   34.60    6.80
  -4  -5   2   29.90    2.20
   4   5   2   39.30    5.10
  -5   4   2   36.50    7.60
   4   5   2   27.90    2.00
   5  -4   2   29.40    1.40
   5  -5  -2  164.88    7.50
   5   5  -2  166.88   10.90
  -5   5  -2  140.39   18.10
  -5   5  -2  163.68    7.10
  -5  -5  -2  154.38   11.30
   5   5  -2  164.48    7.80
   5  -5  -2  154.78   12.60
  -5  -5  -2  168.58    7.50
   5  -5  -2  165.28   10.80
   5   5   2  196.48   11.40
  -5  -5   2  155.48    7.70
   5  -5   2  175.18   15.10
  -5  -5   2  161.68   11.00
   5   5   2  169.08    7.50
  -5   5   2  166.98    7.70
   5  -5   2  166.08    7.00
  -6  -5  -2   91.09    8.80
   6   5  -2   84.39    7.90
   5  -6  -2   95.79    4.70
   6   5  -2   96.69    5.10
  -5   6  -2   77.89   15.50
  -6  -5  -2   93.49    4.70
   5  -6  -2  109.19   12.70
  -5   6  -2   93.99    4.30
   5  -6  -2   97.59    8.10
  -5   6   2  101.19    5.00
   5  -6   2   87.99    4.20
  -6  -5   2   96.89    8.40
   6   5   2   90.39    4.70
   4  -6  -2  373.96   15.80
   6   4  -2  394.66   16.20
   4  -6  -2  322.67   19.10
  -6  -4  -2  339.97   20.30
   4  -6  -2  362.96   23.90
  -4   6  -2  371.86   15.50
   6   4  -2  352.86   19.30
   4  -6   2  377.86   15.50
   4  -6   2  403.26   21.60
   6   4   2  364.36   15.80
  -6  -4   2  379.36   16.50
   6   4   2  368.96   20.80
  -6  -4   2  402.66   20.10
  -4   6   2  368.06   16.00
   3  -6  -2   20.30    3.80
  -3   6  -2   14.80    1.30
   3  -6  -2   20.10    1.60
   6   3  -2   20.30    2.00
   3  -6  -2   16.30    6.20
  -6  -3  -2   22.20    4.90
  -6  -3  -2   23.10    1.60
   6   3  -2   22.10    4.00
   6   3   2   18.50    1.60
  -6  -3   2   18.50    1.90
  -3   6   2   20.40    1.80
   3  -6   2   19.80    1.40
   3  -6   2   10.30    5.50
   3  -6   2   23.60    5.10
  -6  -3   2   13.80    3.40
   6   3   2   21.50    4.00
   6   2  -2  419.16   18.50
   2  -6  -2  420.56   18.20
  -2   6  -2  425.66   18.00
  -6  -2  -2  446.96   23.20
  -6  -2  -2  425.66   18.10
   2  -6  -2  392.36   26.90
   6   2  -2  459.95   21.40
   2  -6  -2  432.46   21.40
   2  -6   2  448.16   23.10
   6   2   2  422.26   18.00
  -6  -2   2  412.46   18.40
  -2   6   2  450.15   18.40
   2  -6   2  448.16   18.10
   6   2   2  428.16   21.80
   2  -6   2  441.06   29.60
  -2   6   2  445.16   21.50
  -6  -2   2  448.66   21.70
   6   1  -2   25.00    3.70
  -1   6  -2   24.20    1.70
   6   1  -2   24.00    2.10
  -6  -1  -2   26.40    5.10
  -6  -1  -2   24.20    1.50
   1  -6  -2   24.80    1.70
   1  -6  -2   25.80    4.00
   1  -6   2   24.20    4.50
   6   1   2   24.50    1.50
   6   1   2   28.80    4.70
  -1   6   2   22.70    1.90
  -1   6   2   27.20    4.10
   1  -6   2   24.90    1.70
  -6  -1   2   24.40    4.00
   1  -6   2   31.70    8.90
  -6   0  -2 2507.75  112.19
  -6   0  -2 2678.53  105.99
   6   0  -2 2481.75  106.49
   0  -6  -2 2572.14  106.29
   0  -6  -2 2579.64  109.49
   6   0  -2 2528.55  108.79
   0   6  -2 2565.94  110.79
   0  -6   2 2734.33  110.99
   0  -6   2 2554.64  106.29
  -6   0   2 2572.04  109.89
   0   6   2 2743.33  109.79
  -6   0   2 2576.64  106.39
   6   0   2 2675.63  110.99
   6   0   2 2754.32  106.09
  -1  -6  -2   26.60    4.40
   6  -1  -2   27.10    3.80
  -6   1  -2   25.50    5.70
   1   6  -2   24.60    1.90
   1   6  -2   22.70    4.50
   6  -1  -2   23.00    2.10
  -1  -6  -2   25.80    1.80
  -6   1  -2   26.70    1.40
   1   6   2   26.50    4.00
   6  -1   2   24.10    1.40
   1   6   2   26.10    1.90
  -6   1   2   23.30    1.80
  -1  -6   2   24.10    4.20
  -6   1   2   27.20    4.60
   6  -1   2   24.70    4.70
  -2  -6  -2  423.56   22.10
   2   6  -2  408.46   22.40
   6  -2  -2  456.45   21.80
   2   6  -2  466.75   18.80
  -6   2  -2  446.16   26.10
  -2  -6  -2  448.06   18.70
   6  -2  -2  440.06   18.90
   6  -2  -2  428.76   18.90
   6  -2   2  450.45   18.20
  -2  -6   2  461.05   22.60
   2   6   2  455.15   18.70
   2   6   2  428.06   21.90
   6  -2   2  445.66   24.10
  -2  -6   2  445.86   18.80
   6  -2   2  449.06   18.20
  -6   2   2  428.56   23.50
  -3  -6  -2   22.30    4.20
   6  -3  -2   25.70    4.30
   6  -3  -2   16.80    1.90
  -3  -6  -2   19.50    1.70
   6  -3  -2   19.70    1.70
   3   6  -2   17.10    1.70
  -6   3  -2   20.90    6.30
   3   6  -2   12.70    3.20
  -6   3   2   22.10    5.80
   3   6   2   22.30    1.80
  -3  -6   2   16.10    3.70
   6  -3   2   18.10    1.10
   3   6   2   23.40    4.10
   6  -3   2   18.90    1.00
   6  -3   2   12.60    4.40
  -3  -6   2   21.30    1.80
  -4  -6  -2  384.36   20.20
   4   6  -2  357.86   15.80
   4   6  -2  366.06   19.70
   6  -4  -2  370.66   15.70
   6  -4  -2  353.56   15.90
  -6   4  -2  341.47   25.60
   6  -4  -2  349.67   20.00
  -4  -6  -2  381.56   15.70
   6  -4   2  384.06   15.10
  -6   4   2  354.66   23.70
   6  -4   2  355.76   15.20
   4   6   2  353.66   19.30
   4   6   2  365.36   15.60
  -4  -6   2  379.06   19.90
   6  -5  -2  104.99    9.70
  -6   5  -2   62.59   12.80
   6  -5  -2   95.09    5.00
   6  -5  -2   95.99    4.70
  -5  -6  -2   93.89    8.70
   5   6  -2   95.39    5.00
  -6   5   2   96.79   13.40
  -5  -6   2   99.99    8.70
   5   6   2   96.79    4.80
   6  -5   2   85.49    4.20
   6  -5   2   94.79    4.20
  -6  -6  -2  877.71   43.70
   6  -6  -2  942.71   43.10
   6  -6  -2  971.40   46.40
  -6   6  -2  919.31   37.70
  -6   6  -2  792.42   52.79
   6  -6  -2  934.81   38.40
   6   6  -2  890.01   38.30
  -6   6   2  924.71   38.40
   6  -6   2  915.41   37.60
   6   6   2  933.31   38.10
  -6  -6   2  950.70   43.60
  -7  -6  -2    7.20    4.50
   7   6  -2    2.70    1.40
   6  -7  -2    3.20    4.30
  -6   7  -2    2.60    0.90
   6  -7  -2    6.10    3.60
  -6   7  -2    5.70    7.30
   7   6   2    3.40    1.30
   6  -7   2    6.70    1.00
  -7  -6   2    5.50    3.60
   6  -7   2    0.30    3.60
  -5   7  -2   21.20    1.60
   5  -7  -2    6.10    5.40
   7   5  -2   19.10    2.20
   5  -7  -2   25.50    5.20
  -7  -5  -2   16.80    4.80
  -7  -5   2   22.50    5.00
  -5   7   2   21.60    2.20
   5  -7   2   22.10    1.60
   7   5   2   20.50    2.00
   5  -7   2   24.70    5.80
   4  -7  -2  121.19    9.40
  -7  -4  -2  142.29   12.90
   7   4  -2  128.49    6.20
  -4   7  -2  121.09    5.50
   7   4  -2  116.19    9.30
  -7  -4  -2  119.49    5.70
   4  -7  -2  132.49   15.60
   7   4   2  112.89    5.70
  -7  -4   2  109.79    9.40
  -4   7   2  115.49    5.90
   4  -7   2  119.69    5.50
   3  -7  -2  396.56   20.50
   7   3  -2  344.07   19.60
  -7  -3  -2  383.56   22.00
  -3   7  -2  401.06   16.10
   7   3  -2  369.66   16.60
  -7  -3  -2  397.86   16.30
  -7  -3   2  356.06   20.30
  -3   7   2  378.06   16.50
   7   3   2  392.76   16.30
   3  -7   2  387.46   16.20
   3  -7   2  387.56   21.90
  -7  -2  -2   64.19    3.30
   2  -7  -2   53.09   10.90
   7   2  -2   64.89    3.80
  -7  -2  -2   72.19    8.70
   2  -7  -2   66.59    3.50
  -2   7  -2   59.29    3.30
   7   2  -2   62.19    6.00
   2  -7  -2   70.19    6.50
  -7  -2   2   60.19    3.70
   2  -7   2   58.29    7.70
   2  -7   2   71.19    3.40
  -7  -2   2   66.99    6.60
  -2   7   2   66.29    6.50
   7   2   2   64.49    3.30
  -2   7   2   68.69    3.70
   1  -7  -2  127.39    6.10
   7   1  -2  130.69    8.90
   1  -7  -2  134.69    9.40
  -7  -1  -2  147.39   11.40
   7   1  -2  137.39    6.50
  -7  -1  -2  133.89    5.90
  -1   7  -2  134.59    6.00
   1  -7   2  118.79   17.70
  -7  -1   2  123.69    6.30
   1  -7   2  127.39    6.10
  -7  -1   2  132.59    9.60
   7   1   2  124.49    9.50
   1  -7   2  133.09   10.20
  -1   7   2  129.19    9.30
  -1   7   2  133.49    6.20
   7   1   2  130.99    5.90
   0   7  -2   12.50    3.50
   7   0  -2   14.20    3.10
   0  -7  -2    9.40    1.30
  -7   0  -2   12.00    4.10
  -7   0  -2   12.40    1.10
   0  -7  -2   10.90    3.20
   7   0  -2   13.20    1.70
   0   7  -2   12.80    1.40
   7   0   2   13.30    3.80
  -7   0   2    8.90    1.30
   0   7   2    9.90    3.40
   0  -7   2   11.60    1.60
   0   7   2   14.00    1.60
   7   0   2   12.70    1.10
   0  -7   2   10.20    3.50
  -7   0   2   12.60    3.60
   7  -1  -2  135.69    6.50
   7  -1  -2  143.59    9.10
   1   7  -2  120.19   10.00
  -1  -7  -2  130.69    6.30
  -1  -7  -2  146.09    9.90
  -7   1  -2  138.99    5.80
   1   7  -2  133.39    6.30
  -7   1  -2  117.79   11.60
  -1  -7   2  146.19   10.30
   7  -1   2  134.59   10.60
   1   7   2  127.79    6.30
   7  -1   2  133.49    5.80
  -1  -7   2  126.49    6.30
  -7   1   2  127.69    6.30
   1   7   2  130.99    9.30
  -7   1   2  157.08   10.80
  -2  -7  -2   65.99    6.60
  -7   2  -2   55.29    9.20
   7  -2  -2   71.59    6.30
   7  -2  -2   65.09    3.90
   7  -2  -2   64.99    3.70
   2   7  -2   70.99    3.70
   2   7  -2   69.89    9.00
   7  -2   2   68.29    3.10
  -2  -7   2   53.69    6.80
  -7   2   2   65.59    8.40
   2   7   2   68.09    6.60
   2   7   2   63.39    3.60
  -2  -7   2   69.79    3.70
  -3  -7  -2  382.66   20.70
   7  -3  -2  384.36   16.40
  -7   3  -2  336.87   24.60
   7  -3  -2  374.46   16.60
   3   7  -2  383.96   16.40
   7  -3  -2  382.76   20.20
  -7   3   2  390.36   23.40
   3   7   2  391.56   20.40
   3   7   2  380.06   16.30
   7  -3   2  386.06   15.70
  -3  -7   2  353.36   20.40
   7  -3   2  390.06   15.80
   7  -4  -2  113.29    6.00
   7  -4  -2  111.49    5.70
   4   7  -2  120.49    6.00
  -4  -7  -2  113.09    9.70
  -7   4  -2  115.19   18.00
   7  -4   2  122.19    5.10
  -7   4   2   97.49   13.00
   4   7   2  118.29    5.80
  -4  -7   2  127.59    9.80
   7  -5  -2   20.60    2.30
  -7   5  -2   10.80    7.50
  -5  -7  -2   25.50    5.80
   7  -5  -2   19.00    5.00
   5   7  -2   22.20    2.30
   7  -5   2   20.30    1.30
  -5  -7   2   23.20    5.30
   5   7   2   25.70    2.30
  -7   5   2   32.10    8.90
   7  -5   2   19.20    1.50
  -6  -7  -2    1.20    3.00
  -7   6  -2   -5.80    5.90
   7  -6  -2    4.90    4.10
   6   7  -2    3.10    1.30
   7  -6  -2    2.50    1.50
   6   7   2    4.10    1.40
   7  -6   2    5.50    0.90
   7  -6   2    5.40    0.80
  -6  -7   2   11.10    4.40
  -7   6   2    1.50    5.00
  -7   7  -2  201.98   26.90
   7   7  -2  217.98   10.80
   7  -7  -2  234.48   15.70
  -7  -7  -2  214.88   16.10
   7  -7  -2  236.98   10.90
   7   7   2  229.98   10.60
   7  -7   2  239.28   10.10
   7  -7   2  229.78    9.90
  -7  -7   2  255.67   16.40
   7  -8  -2    6.30    1.80
  -8  -7  -2   10.20    4.90
   8   7  -2    8.80    2.00
   7  -8  -2   11.30    5.00
  -7   8  -2    9.40    1.30
  -7   8   2    8.90    1.90
   8   7   2    8.80    1.80
  -8  -7   2   11.00    5.10
   7  -8   2    9.70    1.20
   7  -8   2   25.30    6.60
   6  -8  -2   79.89    9.80
   8   6  -2   81.69    4.90
  -6   8  -2   80.49    4.10
  -8  -6  -2   97.49   11.60
   6  -8   2   89.99   11.40
  -6   8   2   92.79    4.90
  -8  -6   2   82.59   10.00
   8   6   2   77.09    4.60
   6  -8   2   76.69    4.00
   8   5  -2    2.20    1.40
   5  -8  -2    3.90    3.40
  -8  -5  -2   13.70    5.10
  -5   8  -2    6.10    1.10
   5  -8   2    5.50    1.00
  -5   8   2    3.40    1.40
   5  -8   2    8.30    4.10
  -8  -5   2    1.90    3.30
   8   5   2    2.90    1.30
  -8  -4  -2    2.10    3.50
  -4   8  -2    2.70    0.80
   8   4  -2    9.30    1.80
   4  -8  -2    3.70    6.10
   4  -8  -2    4.80    2.70
  -8  -4  -2    4.50    1.10
  -8  -4   2    0.90    3.20
   4  -8   2    3.60    0.90
   4  -8   2    5.20    3.40
   8   4   2    3.90    1.20
  -4   8   2    3.80    1.40
  -8  -3  -2  131.69    6.10
   8   3  -2  121.19    6.60
   3  -8  -2  119.49   16.40
   3  -8  -2  128.09   10.00
  -3   8  -2  127.09    5.90
  -8  -3  -2  148.09   12.30
   8   3   2  128.59    6.10
  -8  -3   2  122.69   10.20
   3  -8   2  129.89   11.40
  -2   8  -2   77.59    4.00
   2  -8  -2   72.49   13.20
   2  -8  -2   70.89    7.40
   8   2  -2   59.39    6.50
  -8  -2  -2   91.29   10.70
   8   2  -2   79.79    4.60
  -8  -2  -2   85.89    4.10
   2  -8   2  104.99    9.40
   8   2   2   83.19    4.10
   2  -8   2   73.99    4.10
  -8  -2   2   94.19    8.30
  -2   8   2   86.49    4.50
  -2   8   2   78.99    7.40
  -1   8  -2    2.40    0.90
   1  -8  -2    1.60    2.20
  -8  -1  -2    2.60    0.70
   8   1  -2    3.00    2.20
   8   1  -2    1.80    1.20
   8   1   2    2.80    0.80
  -1   8   2    1.80    1.00
  -8  -1   2    0.70    2.40
   1  -8   2    1.90    0.90
  -1   8   2    4.70    2.80
   8   0  -2  258.37   14.30
   0  -8  -2  252.77   15.00
  -8   0  -2  258.27   10.60
   8   0  -2  243.08   11.20
   0   8  -2  246.88   10.90
  -8   0  -2  238.58   19.60
  -8   0   2  242.88   15.50
   0  -8   2  250.87   16.10
   0   8   2  232.28   11.00
   8   0   2  251.57   10.60
   0   8   2  246.28   15.00
   0  -8   2  242.38   11.00
   8  -1  -2    0.30    1.10
   1   8  -2    3.30    1.20
  -1  -8  -2    0.10    2.30
   8  -1  -2    1.40    2.30
  -8   1  -2    1.70    0.60
  -8   1   2    2.30    0.90
  -8   1   2    1.30    3.00
   1   8   2    6.40    3.20
   8  -1   2    2.00    0.70
  -1  -8   2    0.00    2.90
  -2  -8  -2   83.99    8.20
   8  -2  -2   89.49    4.80
  -8   2  -2   86.49   12.40
   2   8  -2   82.09    4.50
   8  -2  -2   80.39    4.60
   8  -2  -2   83.99    7.30
   8  -2   2   84.79    3.90
   8  -2   2   88.39    4.00
  -8   2   2   92.89    9.60
  -2  -8   2   93.09   11.70
   2   8   2   79.49    4.50
  -8   2   2   81.29    4.60
   8  -3  -2  120.09    6.30
   3   8  -2  123.69    6.10
  -3  -8  -2  124.49   11.70
   8  -3  -2  109.59    9.40
  -8   3  -2  145.79   14.70
   8  -3   2  124.69    5.30
  -3  -8   2  115.79   10.10
   8  -3   2  121.69    5.50
   3   8   2  124.59    6.10
  -8   3   2  136.09   12.80
   8  -4  -2    4.50    3.40
  -8   4  -2    2.70    5.40
   8  -4  -2    4.70    1.40
  -4  -8  -2   -0.50    2.90
   4   8  -2    4.80    1.40
  -4  -8   2    0.60    2.70
   8  -4   2    4.70    0.70
  -8   4   2    2.40    4.50
   4   8   2    4.60    1.40
   8  -4   2    5.60    0.80
   8  -5  -2    4.20    1.70
   8  -5  -2    1.40    3.70
  -5  -8  -2    6.20    4.10
  -8   5  -2   -0.80    5.20
   5   8  -2    8.20    1.80
   8  -5   2    4.70    0.90
   5   8   2    5.50    1.50
  -5  -8   2    6.40    3.60
  -8   5   2   16.00    7.70
   8  -5   2    4.70    0.70
  -6  -8  -2   92.79    9.60
  -8   6  -2   50.69   12.20
   6   8  -2   81.49    4.80
   8  -6  -2   76.99    4.80
  -8   6   2   62.29   13.30
   8  -6   2   75.39    3.80
   6   8   2   79.39    4.50
  -6  -8   2   61.29    8.80
   8  -6   2   73.49    3.60
  -8   7  -2    0.60    7.00
   7   8  -2    8.00    2.00
  -7  -8  -2    7.10    4.60
   8  -7  -2    6.20    4.00
   8  -7  -2    6.20    1.90
   8  -7   2    8.80    1.00
   7   8   2    7.20    1.80
   8  -7   2    7.00    1.20
  -7  -8   2    4.10    4.20
   8   8  -2   60.59    4.30
   8  -8  -2   59.69    4.30
  -8   8  -2   39.80   13.20
   8  -8  -2   54.69    8.40
  -8  -8  -2   72.79   10.60
   8   8   2   58.79    4.00
  -8  -8   2   50.99    8.80
   8  -8   2   53.29    3.30
   8  -8   2   57.09   10.20
   8  -8   2   57.49    3.10
   8  -9  -2   55.29    9.20
  -9  -8  -2   37.40    8.90
   9   8  -2   44.20    4.00
   8  -9  -2   43.00    3.90
   8  -9   2   39.60    2.80
  -9  -8   2   36.70    7.90
   8  -9   2   33.60    2.50
   8  -9   2   38.90    8.70
   9   8   2   38.90    3.40
  -9  -7  -2   56.59    9.80
  -7   9  -2   57.59    3.40
   9   7  -2   58.39    4.40
   7  -9  -2   54.59    8.50
   7  -9   2   54.39    3.30
   9   7   2   61.19    4.10
  -9  -7   2   64.29    9.20
  -7   9   2   56.59    4.20
   7  -9   2   70.09   10.80
  -6   9  -2   18.20    1.80
  -9  -6  -2   13.10    4.90
   9   6  -2   14.10    2.30
   6  -9  -2   17.00    5.00
  -6   9   2   20.90    2.50
  -9  -6   2   25.80    6.40
   6  -9   2   15.40    1.70
   6  -9   2   19.60    6.70
   9   6   2   17.80    2.20
   9   5  -2   42.30    3.60
  -5   9  -2   47.30    2.90
   5  -9  -2   42.60    7.30
  -9  -5  -2   56.99    9.40
   9   5   2   45.80    3.30
   5  -9   2   42.50    2.80
  -9  -5   2   40.50    7.10
  -5   9   2   54.29    3.50
   5  -9   2   46.60    8.40
  -9  -4  -2   -0.30    3.10
   9   4  -2    1.80    1.50
   4  -9  -2    6.60    6.70
  -4   9  -2    0.90    0.90
   9   4   2   -0.10    1.10
   4  -9   2   -0.30    0.80
  -4   9   2    0.50    1.20
   4  -9   2    1.70    4.00
  -9  -4   2   -0.50    2.80
  -9  -3  -2  782.42   38.60
  -3   9  -2  717.83   29.70
   9   3  -2  699.53   30.30
   3  -9  -2  743.13   35.60
  -9  -3  -2  733.63   29.90
   3  -9   2  713.73   37.00
  -3   9   2  731.53   30.10
   3  -9   2  667.53   29.80
   9   3   2  719.33   29.90
  -9  -3   2  657.83   35.50
   2  -9  -2   43.50    6.80
  -2   9  -2   25.30    2.10
  -9  -2  -2   33.40    7.20
   9   2  -2   25.20    2.60
   2  -9   2   23.60    5.30
  -9  -2   2   26.60    5.60
   2  -9   2   23.40    2.20
  -2   9   2   24.70    2.30
   9   2   2   30.60    2.20
   9   1  -2  136.99    7.20
  -1   9  -2  143.19    6.70
  -9  -1  -2  149.29    6.50
   1  -9  -2  141.79   11.00
  -9  -1  -2  154.58   13.70
  -1   9   2  133.19    6.80
   9   1   2  143.49    6.60
  -9  -1   2  129.29   11.30
   1  -9   2  144.49   11.90
  -9   0  -2   22.30    6.20
   9   0  -2   28.20    3.90
  -9   0  -2   17.60    1.50
   0  -9  -2   15.80    4.60
   0   9  -2   13.20    1.60
   0  -9   2    4.70    3.30
   9   0   2   14.00    1.40
  -9   0   2   19.60    5.20
   0   9   2   15.60    1.90
  -1  -9  -2  138.89   11.20
   9  -1  -2  145.29    7.10
  -9   1  -2  141.09    6.20
   9  -1  -2  121.59   10.00
  -9   1  -2  135.39   14.10
   1   9  -2  144.49    6.80
  -9   1   2  149.99   12.50
   9  -1   2  136.59    6.30
  -1  -9   2  128.09   11.30
   1   9   2  138.09    6.80
   9  -2  -2   34.00    2.90
  -9   2  -2   23.20    7.40
   2   9  -2   28.90    2.50
  -2  -9  -2   37.90    6.60
   9  -2  -2   27.00    5.80
  -2  -9   2   24.30    5.60
  -9   2   2   23.40    6.20
   9  -2   2   31.10    1.80
   2   9   2   30.70    2.60
   9  -2   2   28.40    1.90
  -3  -9  -2  720.63   35.90
  -9   3  -2  680.93   41.30
   3   9  -2  740.83   30.10
   9  -3   2  702.73   29.20
   3   9   2  687.83   30.00
  -3  -9   2  747.13   36.20
  -9   3   2  699.63   39.20
   9  -3   2  712.03   29.40
   9  -4  -2   -0.60    1.30
  -4  -9  -2    3.20    3.70
  -9   4  -2    0.50    5.90
   4   9  -2    2.30    1.40
   4   9   2    1.80    1.40
  -4  -9   2   -1.40    3.10
  -9   4   2    0.40    4.80
   9  -4   2    0.00    0.50
   9  -4   2    0.80    0.70
  -5  -9  -2   45.80    7.90
   9  -5  -2   41.00    3.60
  -9   5  -2   42.10   12.70
   5   9  -2   49.70    3.60
  -5  -9   2   42.10    7.40
  -9   5   2   46.40   13.00
   9  -5   2   48.00    2.70
   5   9   2   54.89    3.50
   9  -5   2   42.40    2.30
  -9   6  -2   29.00   11.10
  -6  -9  -2   15.70    5.40
   9  -6  -2   18.80    2.60
   6   9  -2   15.90    2.30
   9  -6   2   20.30    1.40
  -6  -9   2   17.30    5.20
  -9   6   2   19.50    8.90
   9  -6   2   21.20    1.80
   6   9   2   18.10    2.40
  -9   7  -2   47.90   13.20
   9  -7  -2   65.79    4.50
   7   9  -2   63.49    4.40
  -7  -9  -2   56.29    9.40
   9  -7   2   57.99    3.10
  -9   7   2   42.30   10.90
   9  -7   2   55.69    3.30
   7   9   2   60.79    4.10
  -7  -9   2   61.29    9.60
   8   9  -2   36.40    3.50
   9  -8  -2   41.00    3.70
  -8  -9  -2   43.20    8.40
  -9   8  -2   35.60   14.10
   9  -8  -2   40.30    7.80
   9  -8   2   36.00    2.70
   9  -8   2   40.70    2.40
  -8  -9   2   47.20    8.80
   8   9   2   37.80    3.40
   9  -9  -2   95.59   12.30
   9  -9  -2   75.29    5.60
   9   9  -2   93.09    5.90
  -9  -9  -2   86.59   12.50
   9  -9   2   95.69   13.90
   9  -9   2   92.19    4.50
   9  -9   2   91.09    4.80
  -9  -9   2   87.29   12.00
   9   9   2   96.59    5.60
  10   9  -2    1.70    2.00
   9 -10  -2   11.60    5.20
 -10  -9  -2    4.60    5.50
   9 -10  -2    3.60    2.10
  10   9   2    5.50    2.10
   9 -10   2    5.80    6.60
 -10  -9   2    8.30    7.50
   9 -10   2    3.70    1.30
   8 -10  -2    2.10    4.20
  10   8  -2    2.10    2.10
   8 -10  -2    7.20    2.20
 -10  -8  -2   10.00    5.70
  -8  10  -2    3.40    1.40
   8 -10   2    2.70    1.30
 -10  -8   2    3.80    4.70
   8 -10   2    9.70    5.90
  10   8   2    1.50    1.70
  10   7  -2   47.70    4.20
   7 -10  -2   60.19    9.20
 -10  -7  -2   45.50    9.80
  -7  10  -2   50.89    3.20
  10   7   2   39.90    3.60
   7 -10   2   52.29   10.40
  -7  10   2   49.40    4.00
 -10  -7   2   51.89    9.20
   6 -10  -2   69.39    9.90
  10   6  -2   77.79    5.10
 -10  -6  -2   72.39   11.80
  -6  10  -2   80.09    4.30
  10   6   2   78.69    4.70
  -6  10   2   77.89    5.00
   6 -10   2   66.49   11.20
 -10  -6   2   81.29   11.20
 -10  -5  -2   18.00    6.40
  10   5  -2   22.80    2.80
  -5  10  -2   19.30    2.00
   5 -10  -2   14.90    5.20
 -10  -5   2   36.60    7.40
  -5  10   2   19.40    2.50
   5 -10   2   31.10    6.90
  10   5   2   16.20    2.20
  -4  10  -2  131.39    5.90
  10   4  -2  110.59    6.60
 -10  -4  -2  114.69   14.20
   4 -10  -2  109.79   10.70
  -4  10   2  115.29    6.30
  10   4   2  123.69    6.10
 -10  -4   2  104.49   10.80
   4 -10   2  133.29   12.30
  10   3  -2   18.00    2.40
   3 -10  -2   16.00    5.00
 -10  -3  -2   13.80    5.60
  -3  10  -2   13.50    1.70
   3 -10   2    4.50    3.80
  -3  10   2   17.10    2.20
  10   3   2   15.50    1.80
 -10  -3   2    9.40    4.90
  10   2  -2   15.20    2.20
   2 -10  -2   17.30    5.00
 -10  -2  -2    7.70    5.30
 -10  -2  -2   15.60    1.80
  -2  10  -2   16.40    2.10
  10   2   2   17.90    1.90
   2 -10   2   13.40    5.00
  -2  10   2   17.50    2.10
 -10  -2   2   16.30    5.10
  10   1  -2   65.49    4.40
  -1  10  -2   64.39    3.80
   1 -10  -2   68.39    8.80
 -10  -1  -2   65.39   11.20
  10   1   2   68.49    3.70
   1 -10   2   73.39    9.60
 -10  -1   2   49.20    8.30
  -1  10   2   64.19    4.10
 -10   0  -2  232.18   18.50
  10   0  -2  230.48   10.50
 -10   0  -2  214.38    9.60
   0 -10  -2  223.68   15.30
   0  10  -2  211.18    9.90
   0  10   2  219.48   10.10
 -10   0   2  225.98   16.80
  10   0   2  213.58    9.70
   0 -10   2  227.38   16.10
 -10   1  -2   58.59   11.00
  10  -1  -2   67.79    4.40
   1  10  -2   63.89    3.90
  -1 -10  -2   63.39    8.80
 -10   1  -2   64.99    3.30
   1  10   2   65.79    4.10
  10  -1   2   65.59    3.50
  -1 -10   2   53.79    8.40
 -10   2  -2   13.50    7.10
   2  10  -2   12.80    1.90
  -2 -10  -2   20.20    5.70
  10  -2  -2   16.40    2.30
  10  -2   2   20.40    1.70
   2  10   2   16.30    2.20
  10  -2   2   16.70    1.40
  -2 -10   2   10.90    4.30
 -10   2   2   17.40    7.70
  -3 -10  -2   19.10    5.60
  10  -3  -2   13.10    2.20
   3  10  -2   15.50    2.20
 -10   3  -2   15.10    7.70
   3  10   2   12.20    1.90
 -10   3   2    4.40    5.70
  10  -3   2   13.30    1.40
  -3 -10   2   14.50    5.10
  10  -3   2   16.10    1.30
  10  -4  -2  116.79    6.60
  -4 -10  -2   93.59   10.30
 -10   4  -2  103.19   16.70
   4  10  -2  120.59    6.40
   4  10   2  122.19    6.30
  -4 -10   2  123.49   11.90
 -10   4   2  142.19   18.50
  10  -4   2  121.09    5.50
  10  -4   2  116.69    5.20
  -5 -10  -2    8.00    4.90
 -10   5  -2   28.30   10.90
  10  -5  -2   22.00    2.80
   5  10  -2   23.00    2.70
   5  10   2   15.70    2.30
  -5 -10   2   21.80    6.50
  10  -5   2   16.50    1.60
 -10   5   2   28.40    9.10
  10  -5   2   17.40    1.40
   6  10  -2   89.59    5.20
  10  -6  -2   82.09    5.20
 -10   6  -2   84.79   17.80
  -6 -10  -2   74.69   10.90
  10  -6   2   75.49    4.10
 -10   6   2   60.69   12.20
  10  -6   2   80.89    3.80
  -6 -10   2   95.79   11.80
   6  10   2   77.29    4.90
  -7 -10  -2   51.29    9.50
 -10   7  -2   26.50   13.30
   7  10  -2   55.29    4.20
  10  -7  -2   47.80    4.10
   7  10   2   45.90    3.80
 -10   7   2   21.50   10.60
  10  -7   2   46.90    2.60
  -7 -10   2   56.39    9.50
  10  -7   2   38.70    2.80
  10  -8  -2    7.40    4.80
   8  10  -2    2.70    1.90
  10  -8  -2    1.30    1.90
 -10   8  -2   -2.00    8.90
  -8 -10  -2    3.90    5.50
   8  10   2    1.60    1.80
  10  -8   2    0.90    1.10
  10  -8   2    2.10    0.90
  -8 -10   2    4.00    4.90
  10  -9  -2    1.70    2.00
 -10   9  -2   -0.30   12.20
  10  -9  -2    6.40    4.50
   9  10  -2    2.70    2.00
  -9 -10  -2    3.90    5.80
  -9 -10   2    2.40    6.90
  10  -9   2    0.60    4.90
  10  -9   2    2.70    1.00
   9  10   2    3.50    2.10
  10  -9   2    2.60    1.20
  10 -10  -2  122.49   14.60
  10  10  -2  132.29    7.50
 -10 -10  -2  129.79   17.00
  10 -10  -2  122.09    7.40
  10  10   2  134.79    7.30
 -10 -10   2  154.28   15.20
  10 -10   2  112.09   15.60
  10 -10   2  112.19    6.20
 -11 -10  -2   -4.90    6.00
  10 -11  -2    2.00    2.30
  11  10  -2    0.80    2.30
  10 -11   2   -1.80    6.00
  11  10   2    0.90    2.10
 -11 -10   2   -3.40    5.50
  10 -11   2    1.30    1.40
  11   9  -2    0.20    2.30
   9 -11  -2    3.80    2.30
 -11  -9  -2    1.20    6.00
   9 -11  -2    5.70    4.90
  11   9   2    0.90    2.00
 -11  -9   2    5.00    5.80
   9 -11   2    2.40    1.50
   9 -11   2   -2.70    4.90
 -11  -8  -2   11.40    6.60
  -8  11  -2    1.50    1.70
   8 -11  -2    1.70    1.90
  11   8  -2    1.80    2.10
   8 -11  -2   -1.40    3.70
  11   8   2    1.90    1.80
  -8  11   2   -2.00    1.70
   8 -11   2    0.10    5.30
  -7  11  -2   10.20    1.80
   7 -11  -2    3.50    4.00
 -11  -7  -2   -2.20    8.20
  11   7  -2   19.50    3.00
   7 -11   2   12.10    6.10
  -7  11   2    8.90    2.10
  11   7   2    9.40    2.10
 -11  -7   2   -2.50    4.80
  -6  11  -2   45.90    3.30
   6 -11  -2   51.79    8.60
  11   6  -2   52.79    4.30
 -11  -6  -2   41.70    9.20
  11   6   2   46.70    3.70
   6 -11   2   44.90    9.80
  -6  11   2   50.99    4.00
 -11  -6   2   45.80    9.60
   5 -11  -2   36.50    7.50
  11   5  -2   38.30    3.70
  -5  11  -2   40.00    3.00
 -11  -5  -2   49.30    9.90
 -11  -5   2   37.70    7.50
   5 -11   2   29.40    7.60
  -5  11   2   37.20    3.40
  11   5   2   36.60    3.20
   4 -11  -2    2.00    3.60
  11   4  -2    1.70    1.80
 -11  -4  -2    1.00    4.80
  -4  11  -2    1.40    1.20
  11   4   2    0.40    1.30
  -4  11   2    2.10    1.60
   4 -11   2    5.90    5.30
 -11  -4   2    3.60    4.60
 -11  -3  -2    4.40    5.40
   3 -11  -2    9.80    5.20
  -3  11  -2    8.50    1.60
  11   3  -2    8.10    2.30
 -11  -3   2    9.30    5.40
   3 -11   2   10.80    5.10
  -3  11   2   11.30    2.10
  11   3   2    9.00    2.00
  -2  11  -2    0.80    1.20
 -11  -2  -2    1.60    5.10
   2 -11  -2    0.90    3.40
  11   2  -2    0.10    1.60
  -2  11   2    1.40    1.50
   2 -11   2   -2.20    3.00
 -11  -2   2   -0.10    3.50
  11   2   2    2.30    1.30
 -11  -1  -2   16.90    6.80
  -1  11  -2   11.00    1.80
   1 -11  -2    8.40    4.70
  11   1  -2   12.60    2.30
 -11  -1  -2   12.30    1.60
   1 -11   2   16.60    5.80
  -1  11   2   12.80    2.10
  11   1   2   14.70    1.80
 -11  -1   2    9.30    5.70
   0 -11  -2   89.29   11.00
 -11   0  -2   96.99   14.00
  11   0  -2   67.49    4.80
   0  11  -2   72.99    4.40
  11   0   2   81.79    4.20
 -11   0   2   69.99   10.60
   0  11   2   74.99    4.60
   0 -11   2   71.09   10.10
  11  -1  -2   14.00    2.20
  -1 -11  -2    1.60    4.40
   1  11  -2   11.30    1.90
 -11   1  -2   13.00    7.30
 -11   1  -2   12.40    1.30
  -1 -11   2    4.80    4.50
   1  11   2    9.20    1.80
 -11   1   2   10.50    5.40
  11  -1   2   10.60    1.40
  -2 -11  -2    0.10    3.90
   2  11  -2    2.20    1.50
 -11   2  -2    5.30    5.30
  11  -2  -2    0.80    1.60
   2  11   2   -0.70    1.50
 -11   2   2   -3.10    4.20
  11  -2   2    1.00    1.00
  11  -2   2    0.20    0.70
  -2 -11   2    2.60    4.10
  -3 -11  -2    8.80    4.50
   3  11  -2    7.50    1.90
 -11   3  -2   18.00    9.00
  11  -3  -2    9.90    2.20
  -3 -11   2   23.80    6.00
  11  -3   2   12.00    1.40
   3  11   2    8.60    2.00
 -11   3   2   16.50    7.10
  11  -3   2    9.90    1.10
   4  11  -2    1.30    1.50
 -11   4  -2   -1.70    5.80
  -4 -11  -2    3.70    4.20
  11  -4  -2    0.00    1.60
  -4 -11   2    5.90    4.20
 -11   4   2   11.30    7.60
   4  11   2    1.60    1.50
  11  -4   2    2.10    0.70
  11  -4   2    1.70    0.90
  11  -5  -2   37.00    3.60
   5  11  -2   30.90    3.30
  -5 -11  -2   41.80    8.70
 -11   5  -2   37.30   12.10
  11  -5   2   37.40    2.40
 -11   5   2   29.90   10.90
  11  -5   2   35.60    2.10
  -5 -11   2   56.89    9.60
   5  11   2   39.50    3.50
  -6 -11  -2   41.40    8.60
   6  11  -2   50.89    4.10
  11  -6  -2   49.50    4.20
 -11   6  -2   37.10   11.60
  -6 -11   2   59.89   10.00
  11  -6   2   47.90    2.90
   6  11   2   50.29    4.10
  11  -6   2   46.80    2.60
 -11   6   2   34.20   12.70
   7  11  -2    8.50    2.60
 -11   7  -2    9.20   11.00
  -7 -11  -2   19.30    7.10
  11  -7  -2   13.90    2.50
  11  -7   2   10.20    1.50
   7  11   2   10.80    2.30
  -7 -11   2    4.10    5.30
 -11   7   2   12.70    9.00
  11  -7   2    9.30    1.20
   8  11  -2    1.40    2.10
  11  -8  -2    2.00    2.00
 -11   8  -2    3.30   10.70
  11  -8  -2   -0.10    3.90
  -8 -11  -2   14.00    6.80
   8  11   2   -0.20    2.00
  11  -8   2    1.50    1.00
  11  -8   2    0.90    1.10
  -8 -11   2    7.80    5.40
  11  -9  -2   -1.30    4.20
 -11   9  -2  -21.40   10.40
   9  11  -2    1.80    2.10
  11  -9  -2    1.20    2.10
  -9 -11  -2    9.70    5.90
  -9 -11   2   13.40    6.90
  11  -9   2    7.60    6.70
  11  -9   2    0.80    1.20
   9  11   2    3.60    2.20
 -10 -11  -2    8.60    5.80
  11 -10  -2    2.00    5.40
  11 -10  -2    2.70    2.40
  10  11  -2   -1.00    2.20
  11 -10   2    0.70    1.20
 -10 -11   2   -0.20    4.90
  11 -10   2   -0.60    5.00
  10  11   2    0.80    2.30
  11 -11  -2   12.50    3.00
  11 -11  -2    8.30    6.30
 -11 -11  -2    7.90    7.50
  11  11  -2   16.80    3.30
  11 -11   2   12.50    8.60
  11  11   2   13.80    3.00
 -11 -11   2    8.70    7.70
 -12 -11  -2    7.80    8.10
  12  11  -2   14.20    3.20
  11 -12  -2    6.50    2.50
  11 -12  -2   10.00    7.60
  12  11   2    8.10    2.90
  11 -12   2    6.90    7.60
 -12 -11   2    8.10    7.70
 -12 -10  -2   -2.70    7.30
  12  10  -2    7.00    2.50
  10 -12  -2    9.20    6.30
  10 -12  -2    4.80    2.40
 -12 -10   2    7.60    6.40
  10 -12   2   -0.20    1.50
  10 -12   2    6.70    6.80
  12  10   2    4.70    2.40
   9 -12  -2    8.80    2.70
 -12  -9  -2    6.60    6.40
   9 -12  -2   12.70    6.80
  12   9  -2    8.40    2.70
 -12  -9   2    0.00    5.40
  12   9   2    3.50    2.10
   9 -12   2    5.80    6.50
   9 -12   2    3.30    1.60
  -8  12  -2    0.70    1.40
  12   8  -2    0.00    2.30
 -12  -8  -2    3.00    5.70
   8 -12  -2    0.40    2.00
   8 -12  -2   -0.40    5.30
 -12  -8   2    3.30    6.60
  -8  12   2   -0.30    1.90
   8 -12   2   -0.40    6.00
 -12  -7  -2    2.40    6.40
   7 -12  -2    1.00    4.40
  -7  12  -2    0.60    1.40
  12   7  -2    0.40    2.00
   7 -12   2   -2.90    4.50
 -12  -7   2   -2.30    3.60
  -7  12   2    1.10    1.90
  12   7   2    0.20    1.70
  12   6  -2   74.89    5.40
  -6  12  -2   77.29    4.50
 -12  -6  -2   63.29   11.90
   6 -12  -2   78.69   10.60
  -6  12   2   74.79    5.20
   6 -12   2   60.39   11.20
  12   6   2   72.89    4.90
 -12  -6   2   84.39   12.90
   5 -12  -2   13.60    5.10
  12   5  -2   18.20    2.90
  -5  12  -2   17.60    2.10
 -12  -5  -2   20.90    9.00
 -12  -5   2   16.50    7.20
  12   5   2   13.90    2.30
   5 -12   2    2.10    4.80
  -5  12   2   21.50    2.90
   4 -12  -2    7.90    4.00
  12   4  -2   32.30    3.50
  -4  12  -2   26.60    2.50
 -12  -4  -2   22.30    7.50
 -12  -4   2   17.00    6.70
  12   4   2   21.30    2.50
  -4  12   2   16.70    2.50
   4 -12   2   12.90    6.10
   3 -12  -2    8.90    5.10
  -3  12  -2   12.20    1.90
 -12  -3  -2    6.60    5.70
  12   3  -2    6.80    2.20
  12   3   2    9.10    1.80
 -12  -3   2   13.40    6.10
   3 -12   2    3.90    5.50
  -3  12   2    8.50    1.90
   2 -12  -2   16.80    5.60
  12   2  -2   23.20    3.10
  -2  12  -2   19.60    2.40
 -12  -2  -2   32.80    8.60
 -12  -2   2   18.50    6.60
   2 -12   2   23.20    7.50
  -2  12   2   23.70    2.90
  12   2   2   20.50    2.70
  -1  12  -2    3.60    1.60
 -12  -1  -2   11.30    5.90
  12   1  -2    8.40    2.30
   1 -12  -2    2.10    3.90
 -12  -1   2    4.10    5.90
   1 -12   2    6.50    4.90
  12   1   2    5.90    1.40
  -1  12   2    4.90    1.80
 -12   0  -2  183.68   19.10
  12   0  -2  193.18    9.80
   0 -12  -2  203.68   15.90
 -12   0  -2  183.88    8.70
   0  12  -2  199.98    9.30
 -12   0   2  187.98   17.20
  12   0   2  201.48    8.90
   0  12   2  192.88    9.40
   0 -12   2  188.28   16.30
  12  -1  -2    5.20    2.00
   1  12  -2    5.00    1.80
 -12   1  -2    3.10    1.10
  -1 -12  -2    5.00    4.30
 -12   1  -2   -4.00    5.30
   1  12   2    3.40    1.60
 -12   1   2    2.70    5.50
  -1 -12   2    6.00    4.90
  12  -1   2    4.50    1.30
  -2 -12  -2   18.70    6.20
 -12   2  -2    9.20    7.70
  12  -2  -2   24.60    3.10
   2  12  -2   14.50    2.30
  12  -2   2   20.20    1.90
 -12   2   2   32.50    8.90
  12  -2   2   21.10    1.80
   2  12   2   19.30    2.70
  -2 -12   2   18.80    6.80
  12  -3  -2   10.60    2.30
 -12   3  -2    5.20    8.50
   3  12  -2    8.60    2.00
  -3 -12  -2   13.00    6.10
   3  12   2   11.60    2.20
  12  -3   2   11.10    1.50
  12  -3   2   11.80    1.30
  -3 -12   2    9.60    5.40
 -12   3   2   13.80    8.70
  12  -4  -2   23.40    3.00
  -4 -12  -2   19.20    6.00
 -12   4  -2   17.30    8.80
   4  12  -2   22.20    2.70
  12  -4   2   23.50    1.70
  -4 -12   2   19.90    6.60
  12  -4   2   24.40    2.00
 -12   4   2   25.60   10.40
   4  12   2   15.70    2.50
  -5 -12  -2   10.10    5.40
   5  12  -2   17.20    2.60
  12  -5  -2   16.30    2.70
 -12   5  -2    9.90    7.00
  12  -5   2   13.00    1.30
 -12   5   2   17.40    9.10
  -5 -12   2    6.60    6.40
   5  12   2   19.10    2.80
  12  -5   2   16.00    1.70
  12  -6  -2   69.89    5.10
  -6 -12  -2   69.89   12.30
   6  12  -2   76.59    5.20
 -12   6  -2   48.30   20.00
  12  -6   2   71.89    3.90
   6  12   2   69.19    5.10
 -12   6   2   64.89   17.80
  -6 -12   2   92.29   12.00
  12  -6   2   77.29    3.60
  -7 -12  -2   -4.80    3.70
  12  -7  -2    3.00    2.00
   7  12  -2    0.70    2.00
 -12   7  -2    2.70   10.10
  12  -7   2    1.50    1.10
 -12   7   2    1.20   11.20
   7  12   2    1.60    2.00
  -7 -12   2    1.90    5.00
  -8 -12  -2    5.30    5.20
 -12   8  -2   -8.60    9.30
   8  12  -2    3.00    2.30
  12  -8  -2    2.50    2.10
  12  -8  -2    7.10    5.00
   8  12   2    4.70    2.30
 -12   8   2    1.20   11.40
  -8 -12   2   -2.80    4.50
  12  -8   2    0.60    1.10
  -9 -12  -2    1.80    5.60
  12  -9  -2    2.70    2.30
 -12   9  -2  -11.90   11.30
   9  12  -2    2.00    2.20
   9  12   2    4.60    2.40
  12  -9   2    4.10    1.40
  -9 -12   2   11.00    6.80
  10  12  -2    2.50    2.50
 -10 -12  -2    7.20    7.20
  12 -10  -2    1.90    2.40
  12 -10  -2   -5.10    4.90
  12 -10   2    3.60    6.50
  10  12   2    1.70    2.30
 -10 -12   2    8.30    7.00
  12 -10   2    4.80    1.50
 -11 -12  -2    7.50    7.40
  11  12  -2    4.30    2.60
  12 -11  -2    9.10    2.60
  12 -11  -2    6.50    7.10
 -11 -12   2    6.60    7.20
  11  12   2    7.90    3.00
  12 -11   2    2.50    7.10
  12  12  -2    1.40    2.60
 -12 -12  -2    5.10    8.10
  12 -12  -2    8.40    5.70
  12 -12  -2    1.50    2.30
 -12 -12   2   15.80    7.50
  12  12   2    0.90    2.70
  12 -12   2  -19.20    8.30
  11 -13  -2   11.00    7.70
  13  11  -2    9.50    3.20
  11 -13  -2    9.10    2.90
 -13 -11  -2   12.70    9.00
 -13 -11   2    2.30    7.50
  11 -13   2   10.80    8.60
  13  11   2    7.40    2.80
 -13 -10  -2   12.10    7.90
  10 -13  -2    7.30    6.80
  10 -13  -2   20.20    3.50
  13  10  -2   17.90    3.20
  10 -13   2   23.50    9.00
  13  10   2    3.70    2.70
 -13 -10   2    1.00    7.40
  10 -13   2    7.00    1.90
   9 -13  -2    9.40    2.70
  13   9  -2    6.90    2.90
   9 -13  -2    8.70    6.30
 -13  -9  -2    4.80    8.30
 -13  -9   2   -3.50    7.70
  13   9   2    9.50    2.60
   9 -13   2   16.20    7.70
   9 -13   2   12.20    2.20
   8 -13  -2   14.30    6.20
  13   8  -2    1.00    2.50
 -13  -8  -2   17.70    8.00
  -8  13  -2    1.60    1.60
 -13  -8   2    3.60    6.60
  -8  13   2    6.40    2.50
  13   8   2    5.60    2.20
   8 -13   2    7.70    6.60
   7 -13  -2   85.39   12.10
  13   7  -2   90.69    6.30
  -7  13  -2   85.09    5.10
 -13  -7  -2   63.49   13.80
   7 -13   2   79.99   13.00
 -13  -7   2   71.09   12.20
  -7  13   2   85.79    5.80
  13   7   2   78.79    5.70
   6 -13  -2    7.70    5.50
  13   6  -2    5.80    2.60
  -6  13  -2    8.10    1.90
 -13  -6  -2   -8.90    5.80
  13   6   2    6.10    2.20
  -6  13   2   10.10    3.10
   6 -13   2    1.80    6.10
 -13  -6   2    5.30    6.90
  13   5  -2    0.30    2.50
   5 -13  -2   -3.50    4.10
 -13  -5  -2    4.70    5.90
  -5  13  -2    2.00    1.60
  13   5   2   -0.40    1.70
  -5  13   2    0.00    2.10
 -13  -5   2    3.70    6.00
   5 -13   2   -4.80    4.40
 -13  -4  -2   31.90    9.20
  -4  13  -2   27.80    2.80
   4 -13  -2   24.00    6.80
  13   4  -2   25.20    3.50
   4 -13   2   28.90    8.40
  -4  13   2   23.90    3.20
 -13  -4   2   26.90    8.40
  13   4   2   27.80    2.90
 -13  -3  -2   38.90   10.60
   3 -13  -2   47.10    9.30
  -3  13  -2   45.40    3.60
  13   3  -2   39.40    4.20
 -13  -3   2   56.79   11.30
   3 -13   2   46.40    9.50
  -3  13   2   48.90    4.10
  13   3   2   47.90    3.60
  13   2  -2   17.50    3.00
  -2  13  -2   17.10    2.40
   2 -13  -2   17.20    6.70
  13   2   2   22.70    2.40
 -13  -2   2   22.80    7.90
  -2  13   2   20.10    2.80
   1 -13  -2   37.40    8.60
  -1  13  -2   38.10    3.40
  13   1  -2   37.10    3.90
 -13  -1  -2   27.40   10.00
  -1  13   2   38.40    3.70
   1 -13   2   34.70   10.10
 -13  -1   2   50.09   10.40
  13   1   2   41.20    3.50
   0 -13  -2    8.00    6.30
 -13   0  -2   20.10    9.00
   0  13  -2    9.50    2.00
  13   0  -2   14.00    2.70
   0  13   2   11.20    2.30
   0 -13   2   20.10    8.50
  13   0   2   13.10    1.80
 -13   0   2    8.20    5.70
  -1 -13  -2   38.10    8.60
 -13   1  -2   59.19   13.90
   1  13  -2   41.50    3.60
  13  -1  -2   39.50    3.70
  13  -1   2   33.40    2.80
   1  13   2   43.20    3.90
  13  -1   2   33.80    2.60
 -13   1   2   47.00   10.40
  -2 -13  -2    8.30    6.80
 -13   2  -2   28.80   10.70
   2  13  -2   16.40    2.50
  13  -2  -2   18.40    2.80
 -13   2   2   14.10    7.30
  -2 -13   2   15.20   10.90
  13  -2   2   22.80    2.10
  13  -2   2   22.50    1.90
   2  13   2   18.40    4.40
  13  -3  -2   55.49    4.50
   3  13  -2   57.39    4.30
  -3 -13  -2   56.19   10.30
  13  -3   2   57.19    3.00
  13  -3   2   53.39    3.30
   3  13   2   48.00    4.40
 -13   3   2   56.39   12.70
  -3 -13   2   47.80    9.50
  13  -4  -2   23.90    3.10
  -4 -13  -2   40.90    9.30
 -13   4  -2   28.20   11.50
   4  13  -2   30.20    3.30
  13  -4   2   27.00    2.20
  13  -4   2   24.40    1.90
   4  13   2   27.20    3.20
 -13   4   2   -3.10    7.30
  -4 -13   2   21.90    7.60
  13  -5  -2   -0.60    1.80
 -13   5  -2   -2.40   10.60
  -5 -13  -2   -3.30    4.60
   5  13  -2   -0.80    1.90
 -13   5   2   10.90   11.80
  -5 -13   2    3.00    5.20
   5  13   2    0.80    1.90
  13  -5   2   -0.40    1.00
  -6 -13  -2    8.60    6.10
  13  -6  -2    5.60    2.40
 -13   6  -2    4.00   10.40
   6  13  -2    7.40    2.50
  -6 -13   2    2.50    5.40
   6  13   2    2.90    2.10
 -13   6   2   -6.50   10.40
  13  -6   2    5.40    1.20
 -13   7  -2   63.99   18.40
   7  13  -2   90.39    5.90
  -7 -13  -2   67.79   12.20
  13  -7  -2   83.89    5.70
  -7 -13   2   83.59   12.60
   7  13   2   76.49    5.70
  13  -7   2   76.59    4.20
 -13   7   2   80.79   20.60
  13  -8  -2    1.10    5.00
   8  13  -2    1.10    2.20
 -13   8  -2   -7.40   13.30
  -8 -13  -2    0.60    5.70
  13  -8  -2    4.10    2.40
  -8 -13   2   -0.30    6.40
 -13   8   2   13.10   13.20
  13  -8   2    2.70    1.30
   8  13   2    2.60    2.20
  -9 -13  -2    0.20    5.40
   9  13  -2    9.20    3.00
  13  -9  -2    8.70    2.70
 -13   9  -2   -0.80   12.70
  13  -9  -2   13.20    7.10
  -9 -13   2   12.10    6.50
   9  13   2    6.80    2.60
  10  13  -2   16.80    3.20
  13 -10  -2   11.90    2.90
  13 -10  -2   18.20    7.90
 -10 -13  -2   -1.70    6.60
 -10 -13   2   10.90    7.00
  13 -10   2   19.70    8.40
  10  13   2    7.60    2.70
  11  13  -2    8.50    3.10
  13 -11  -2   10.60    7.60
  13 -11  -2    6.80    3.00
 -11 -13  -2    6.60    8.00
 -11 -13   2   17.50    8.80
  13 -11   2    6.10    7.90
  11  13   2   11.30    3.70
  14   9  -2    8.10    3.20
   9 -14  -2   13.40    3.00
   9 -14  -2   16.30    7.40
 -14  -9   2    1.20    7.70
   9 -14   2    5.80    7.60
  14   9   2   15.00    3.00
   9 -14   2    9.80    2.30
  -8  14  -2   11.70    2.30
   8 -14  -2    4.10    6.20
  14   8  -2   10.80    3.10
 -14  -8  -2    7.10    8.30
  -8  14   2    9.00    2.70
   8 -14   2    6.50    7.80
  14   8   2   10.40    2.50
 -14  -8   2    8.30    8.10
   7 -14  -2   11.80    6.70
  14   7  -2   -1.60    2.50
 -14  -7  -2   -5.10    6.50
  -7  14  -2   -2.50    1.60
  14   7   2    0.00    2.00
   7 -14   2    1.00    6.00
 -14  -7   2   -0.30    6.60
  -7  14   2    1.90    2.30
  14   6  -2   10.20    2.80
  -6  14  -2    7.70    2.00
   6 -14  -2    3.80    5.70
 -14  -6  -2    7.10    7.70
  14   6   2    8.50    2.30
  -6  14   2    8.30    2.50
   6 -14   2   -0.50    5.40
 -14  -6   2   18.10    7.90
  14   5  -2    3.50    2.50
 -14  -5  -2   -3.40    5.00
  -5  14  -2    0.80    1.60
   5 -14  -2    9.10    5.50
 -14  -5   2    8.20    6.90
  14   5   2    1.70    1.70
   5 -14   2    2.60    6.10
  -5  14   2    2.80    2.10
 -14  -4  -2    7.90    6.50
   4 -14  -2    0.50    5.30
  -4  14  -2    1.60    1.70
  14   4  -2    2.60    2.40
  14   4   2    0.20    1.70
   4 -14   2   -3.30    5.20
 -14  -4   2   -4.20    5.70
  -4  14   2    2.00    2.00
 -14  -3  -2   33.00   10.50
   3 -14  -2   24.80    9.00
  -3  14  -2   36.40    3.30
  14   3  -2   25.90    4.70
  14   3   2   36.30    3.20
   3 -14   2   31.00    8.90
  -3  14   2   31.10    3.70
 -14  -2  -2   17.20    8.40
  -2  14  -2    7.30    2.10
  14   2  -2    4.80    2.40
 -14  -2   2    8.00    6.30
  14   2   2   12.20    2.10
  -2  14   2    6.50    2.20
   2 -14   2   14.90    6.60
  -1  14  -2    0.50    1.80
 -14  -1  -2    3.90    7.60
  14   1  -2    1.90    2.10
 -14  -1   2    6.20    7.30
  -1  14   2   -1.10    1.90
   1 -14   2   -4.30    4.40
  14   1   2    0.10    1.40
   0 -14  -2    3.50    5.30
 -14   0  -2   -5.50    7.50
  14   0  -2    5.80    2.40
   0  14  -2    2.40    1.90
  14   0   2    6.50    1.70
   0  14   2    3.50    2.00
   0 -14   2    2.80    5.40
 -14   0   2    1.20    7.00
  14  -1  -2   -1.50    2.00
   1  14  -2    0.40    2.00
  -1 -14  -2    0.10    4.80
 -14   1  -2   10.70    8.80
 -14   1   2    2.00    6.80
  14  -1   2   -0.70    1.30
   1  14   2   -3.40    1.70
  -1 -14   2   -7.90    4.50
   2  14  -2    5.30    2.10
 -14   2  -2   -3.70    7.20
  -2 -14  -2   10.70    7.30
  14  -2  -2    6.80    2.50
 -14   2   2    8.80    7.80
   2  14   2    5.20    2.30
  -2 -14   2   21.10    6.60
  14  -2   2    9.30    1.60
 -14   3  -2   18.50   10.90
  14  -3  -2   27.90    3.50
  -3 -14  -2   42.40    9.50
   3  14  -2   26.60    3.20
 -14   3   2   57.49   14.40
  -3 -14   2   44.70   10.50
  14  -3   2   30.80    2.50
   3  14   2   27.30    3.40
  -4 -14  -2   -1.30    5.50
  14  -4  -2    1.90    2.00
 -14   4  -2   -7.30    8.30
   4  14  -2    5.80    2.20
  -4 -14   2    5.50    6.20
  14  -4   2    3.00    1.20
   4  14   2    2.60    2.20
 -14   4   2   15.40   10.70
 -14   5  -2   12.60   11.20
  -5 -14  -2    0.00    5.00
   5  14  -2    1.90    2.30
  14  -5  -2   -1.40    1.80
 -14   5   2    1.70   11.10
  -5 -14   2   -0.30    6.20
  14  -5   2   -1.50    1.00
   5  14   2   -0.70    2.00
 -14   6  -2   10.80   10.40
  -6 -14  -2   11.20    6.90
   6  14  -2   11.40    2.80
  14  -6  -2    8.50    2.70
  14  -6   2    9.90    1.70
   6  14   2   13.20    2.90
 -14   6   2    5.20   13.00
  -6 -14   2    4.70    7.10
   7  14  -2    2.20    2.50
 -14   7  -2    3.00   14.60
  -7 -14  -2    6.10    6.50
  14  -7  -2    2.30    2.70
   7  14   2    0.90    2.20
  -7 -14   2   -4.30    5.60
 -14   7   2   -7.50   12.20
  14  -8  -2    9.50    2.70
   8  14  -2    4.60    2.80
  14  -8  -2   15.60    7.20
 -14   8  -2   19.50   15.10
  -8 -14  -2   20.90    8.80
  -8 -14   2   11.40    6.90
   8  14   2   13.10    3.00
 -14   8   2   -8.10   14.10
  14  -9  -2   12.90    7.50
   9  14  -2    5.30    5.20
  14  -9  -2    7.00    2.70
 -14   9  -2  -17.20   14.00
   9  14   2   19.60    3.70
  -9 -14   2   35.30   15.60
  -8  15  -2    6.90    2.20
  15   8  -2    1.90    3.30
 -15  -8  -2    6.90    9.00
   8 -15  -2    6.10    7.30
   8 -15   2    4.80    7.50
  15   8   2    3.20    2.20
 -15  -8   2   -1.80    7.40
  -8  15   2    2.60    2.60
   7 -15  -2    4.40    6.70
  15   7  -2   -0.90    2.60
 -15  -7  -2    1.20   10.20
  -7  15  -2   -1.10    1.90
  15   7   2    2.00    2.50
 -15  -7   2   -9.30    7.30
  -7  15   2    0.80    2.10
   7 -15   2   -3.40    6.20
  -6  15  -2    2.60    2.10
 -15  -6  -2    5.70    9.10
  15   6  -2    5.60    2.90
   6 -15  -2    1.10    6.40
  15   6   2    1.90    2.10
  -6  15   2    4.40    2.50
 -15  -6   2   10.60    8.40
   6 -15   2   -0.30    6.70
  15   5  -2    0.80    2.30
   5 -15  -2    3.90    6.00
 -15  -5  -2   -4.80    7.10
   5 -15   2   -3.70    5.60
  15   5   2    2.30    2.30
  -5  15   2    2.70    2.20
 -15  -5   2    6.70    6.90
   4 -15  -2   -0.60    6.10
  15   4  -2    2.70    2.20
  -4  15  -2    0.00    1.90
 -15  -4  -2   11.20    9.20
  -4  15   2   -1.50    1.90
  15   4   2   -2.30    1.80
   4 -15   2   -6.00    5.10
 -15  -4   2    4.80    7.80
  -3  15  -2   23.20    2.90
   3 -15  -2   30.20    8.30
 -15  -3  -2   21.00    8.70
  15   3  -2   20.40    3.30
 -15  -3   2   28.40    8.90
  15   3   2   20.70    2.80
  -3  15   2   20.50    3.20
   3 -15   2    5.20    6.70
   2 -15  -2   -2.30    5.60
 -15  -2  -2   -5.60    8.40
  15   2  -2    4.40    2.60
  -2  15  -2    2.00    2.10
 -15  -2   2    1.90    6.80
  15   2   2    3.30    1.80
   2 -15   2    1.40    4.90
  -2  15   2    1.70    2.00
   1 -15  -2    1.10    4.60
  15   1  -2    2.60    2.40
  -1  15  -2    1.30    2.00
 -15  -1  -2    0.50    8.20
   1 -15   2   -1.70    6.00
  -1  15   2    4.30    2.30
 -15  -1   2    8.30    7.80
  15   1   2    2.60    1.70
 -15   0  -2    1.50    8.40
   0 -15  -2   -0.50    5.30
  15   0  -2    2.10    2.50
   0  15  -2    3.70    2.10
   0 -15   2    7.70    6.30
  15   0   2    5.60    1.70
 -15   0   2    3.00    8.30
   0  15   2    5.30    2.30
  -1 -15  -2    3.60    7.30
 -15   1  -2   11.10    9.00
   1  15  -2    0.20    1.80
 -15   1   2   17.60    9.90
   1  15   2    5.30    2.40
  -1 -15   2   -7.10    5.40
  15  -1   2    1.80    1.50
   2  15  -2    2.00    2.10
  -2 -15  -2   18.70    8.00
 -15   2  -2   13.90   11.10
  15  -2  -2    5.20    2.50
  15  -2   2    0.90    1.30
  -2 -15   2    8.50    6.20
   2  15   2    3.60    2.30
 -15   2   2    1.40    9.30
   3  15  -2   21.30    3.00
 -15   3  -2   31.90   11.60
  -3 -15  -2   24.50    9.20
  15  -3  -2   21.10    3.50
  -3 -15   2   10.90    7.60
 -15   3   2   20.80   10.50
  15  -3   2   21.50    2.10
   3  15   2   21.50    3.20
  -4 -15  -2    5.00    6.20
 -15   4  -2    0.50   10.70
   4  15  -2   -0.20    2.20
   4  15   2   -0.30    2.10
 -15   4   2   -6.60   11.30
  -4 -15   2    4.80    6.10
  15  -5  -2    2.70    2.40
   5  15  -2    0.70    2.30
 -15   5  -2  -10.90   10.70
  -5 -15  -2    1.00    5.20
   5  15   2    1.60    2.30
 -15   5   2   15.50   14.10
  -5 -15   2    2.00    6.80
 -15   6  -2   -1.50   12.80
   6  15  -2    0.00    2.40
  15  -6  -2    2.40    2.20
  -6 -15  -2   13.40    6.90
 -15   6   2   16.60   14.10
  -6 -15   2   -3.90    6.50
   6  15   2   -0.50    2.00
   7  15  -2    0.90    2.80
  15  -7  -2    1.70    2.30
  -7 -15  -2    0.50    6.80
 -15   7  -2   12.60   15.50
   7  15   2    0.10    2.70
 -15   7   2    2.20   16.00
  -7 -15   2    5.90    7.50
  -8 -15  -2   -4.50    6.70
  15  -8  -2    7.00    2.60
   8  15  -2    1.20    2.70
  15  -8  -2   14.10    7.20
 -15   8  -2    7.20   17.10
   8  15   2    2.50    2.50
  -8 -15   2   11.80    8.20
 -15   8   2   -1.10   14.20
  16   5  -2    4.10    2.90
 -16  -5  -2    2.70   10.20
  -5  16  -2    4.50    2.30
   5 -16  -2   -0.50    6.30
 -16  -5   2    2.50    9.00
   5 -16   2    6.10   11.10
  -5  16   2    4.80    2.80
  16   5   2    1.80    2.10
  16   4  -2   26.40    4.00
 -16  -4  -2   34.90   12.30
  -4  16  -2   32.70    3.40
   4 -16  -2   22.20    9.00
   4 -16   2   42.90   10.10
 -16  -4   2   20.20   10.70
  -4  16   2   34.90    3.90
  -3  16  -2    2.80    2.20
   3 -16  -2    1.00    6.40
 -16  -3  -2    4.50    8.20
  16   3  -2    3.50    2.50
 -16  -3   2    2.50    8.30
  -3  16   2    5.70    2.60
   3 -16   2    1.80    7.40
  16   3   2    4.70    2.10
  -2  16  -2    6.60    2.10
 -16  -2  -2    2.80    9.90
  16   2  -2    2.30    2.60
   2 -16  -2   10.90    6.70
  16   2   2    7.10    2.10
 -16  -2   2   -2.10    9.00
  -2  16   2    5.00    2.60
   2 -16   2   -5.90    6.20
  16   1  -2    7.60    2.70
  -1  16  -2    4.50    2.30
 -16  -1  -2   12.30    9.50
   1 -16  -2   13.40    7.30
  16   1   2   10.30    2.00
 -16  -1   2    6.10    9.50
   1 -16   2   19.10    8.00
  -1  16   2   10.40    2.80
 -16   0  -2    5.70   10.70
   0  16  -2   14.20    2.70
  16   0  -2   17.50    3.20
   0 -16  -2   20.50    7.40
 -16   0   2   32.90   11.90
   0  16   2   14.30    2.80
   0 -16   2   16.40    7.30
  16   0   2   14.30    2.20
  16  -1  -2    2.90    2.40
   1  16  -2   11.90    2.80
 -16   1  -2   12.70   10.30
  -1 -16  -2    2.30    6.80
   1  16   2    8.70    2.80
  16  -1   2    9.60    1.80
  -1 -16   2   -4.00    6.20
 -16   1   2   10.30   10.20
   2  16  -2    3.80    2.20
  -2 -16  -2    6.40    6.50
  16  -2  -2    3.00    2.50
 -16   2  -2   14.30    9.90
  -2 -16   2    2.00    7.60
   2  16   2    6.70    2.80
 -16   2   2    9.90   11.50
 -16   3  -2    9.90   13.50
  -3 -16  -2   12.70    7.40
  16  -3  -2    3.70    2.30
   3  16  -2    4.60    2.40
   3  16   2    6.60    2.50
 -16   3   2   19.50   14.10
  -3 -16   2    2.80    7.60
  -4 -16  -2   49.99   11.70
   4  16  -2   36.10    4.10
 -16   4  -2   44.30   16.80
  16  -4  -2   25.00    3.80
  -4 -16   2   40.20   11.20
   4  16   2   27.40    4.40
 -16   4   2   53.39   16.50
  -5 -16  -2   12.40    9.20
 -16   5  -2   -4.10   13.00
  16  -5  -2    5.00    2.60
 -16   5   2    8.70   13.20
   5  16   2    2.70    2.70
  -5 -16   2   12.20    8.50
   1 -17  -2    4.90    7.40
 -17  -1  -2  -20.00    9.30
  -1  17  -2    2.30    2.20
  17   1  -2   -1.40    2.20
   1 -17   2   -0.50    6.60
 -17  -1   2   13.60   11.20
  -1  17   2   -2.00    2.20
   0  17  -2   12.00    2.90
  17   0  -2    8.80    2.70
 -17   0  -2    4.20   10.60
   0 -17  -2   11.30    8.30
 -17   0   2   26.60   13.00
   0 -17   2   16.10    7.80
   0  17   2   11.40    3.00
  -1 -17  -2    2.10    9.10
   1  17  -2    1.80    2.30
 -17   1  -2   10.50   12.70
  17  -1  -2   -0.60    2.50
 -17   1   2   21.10   12.40
   1  17   2    1.80    2.50
  -1 -17   2    1.40    7.40
   0   0  -3  194.48   10.90
   0   0  -3  200.48    8.40
   0   0  -3  192.28    8.40
   0   0   3  196.28    9.60
   0  -1  -3 1483.25   61.09
  -1   0  -3 1523.55   61.09
   0   1  -3 1361.16   65.79
   0  -1  -3 1543.45   62.29
  -1   0  -3 1422.26   63.99
   1   0  -3 1530.45   61.29
   0   1  -3 1471.65   61.09
  -1   0  -3 1473.65   60.99
   1   0   3 1509.35   63.09
   0   1   3 1527.45   61.69
  -1   0   3 1459.55   61.19
  -1   0   3 1600.34   62.19
   0  -1   3 1509.15   62.69
  -1   0   3 1462.35   61.39
   0  -1   3 1639.34   65.89
   0  -1   3 1481.35   61.09
   1  -1  -3  901.21   37.10
   1  -1  -3  912.21   37.10
  -1  -1  -3  894.61   38.80
  -1   1  -3  856.81   41.80
   1   1  -3  987.70   37.10
  -1   1  -3  890.81   36.90
  -1  -1  -3  870.31   36.90
  -1  -1   3  844.62   37.90
  -1  -1   3  923.11   40.90
   1  -1   3  882.21   36.80
   1  -1   3 1000.60   40.70
  -1  -1   3  899.11   37.10
   1   1   3  884.21   36.90
  -2  -1  -3   98.69    4.40
   1  -2  -3   97.79    4.70
  -1   2  -3  104.09    4.40
  -1   2  -3  103.59    9.90
   2   1  -3  105.89    5.60
   2   1  -3  100.59    4.70
   1  -2  -3  105.49    4.60
  -2  -1  -3  105.29    6.90
  -1   2   3  100.19    4.80
  -2  -1   3   91.59    4.60
   2   1   3  101.59    6.20
   1  -2   3   97.99    4.50
   1  -2   3   97.39    8.60
   2   1   3  108.69    4.60
  -1   2   3   95.99    4.60
  -2  -1   3   97.79    5.40
   0   2  -3  603.34   24.70
   0  -2  -3  585.54   25.60
   0  -2  -3  584.24   24.70
  -2   0  -3  590.04   24.50
   2   0  -3  595.04   24.90
   2   0  -3  607.14   25.00
  -2   0  -3  604.14   28.20
   0  -2   3  616.14   30.60
   0  -2   3  607.14   24.70
   2   0   3  604.84   24.50
   0   2   3  578.64   24.70
  -2   0   3  563.34   24.80
   0   2   3  615.44   25.50
   2   0   3  629.74   27.30
   0  -2   3  599.44   26.80
  -2   0   3  612.74   24.90
  -2   1  -3   99.79    4.30
  -1  -2  -3   96.69    5.90
   2  -1  -3  104.69    4.80
   1   2  -3  102.29    6.30
   1   2  -3  107.49    4.70
  -1  -2  -3  104.19    4.50
  -2   1  -3  101.09    8.40
   2  -1  -3  102.29    4.80
  -2   1  -3   99.79    4.30
   1   2   3   97.99    4.60
  -1  -2   3   92.59    5.90
   1   2   3   98.19    5.70
   2  -1   3  112.49    7.70
  -1  -2   3  102.59    4.70
   2  -2  -3   67.19    3.60
  -2  -2  -3   69.29    3.30
   2   2  -3   71.69    4.90
   2  -2  -3   74.29    3.50
   2  -2  -3   68.29    3.70
  -2   2  -3   81.19   10.20
  -2   2  -3   69.29    3.10
   2   2  -3   71.89    3.50
  -2  -2  -3   69.19    5.20
   2  -2  -3   71.29    3.40
   2   2   3   72.59    3.30
   2  -2   3   71.29    3.10
  -2  -2   3   66.59    4.60
  -2  -2   3   73.29    3.60
   2   2   3   76.19    5.00
   2  -2   3   83.09    7.50
  -2   3  -3 1047.10   56.69
  -3  -2  -3 1137.99   47.40
  -3  -2  -3 1161.08   50.79
   2  -3  -3 1188.18   47.70
   3   2  -3 1178.08   49.40
   2  -3  -3 1130.59   50.79
   2  -3  -3 1162.38   48.30
   3   2  -3 1188.48   47.80
  -2   3  -3 1157.78   47.30
  -2   3   3 1183.58   47.80
  -3  -2   3 1133.79   49.30
   3   2   3 1171.98   49.99
   2  -3   3 1139.49   47.30
   3   2   3 1176.08   47.40
  -3  -2   3 1111.49   47.70
   2  -3   3 1326.67   55.99
  -3  -1  -3  117.69    8.50
   1  -3  -3  132.99    6.70
   1  -3  -3  130.89    5.90
   3   1  -3  144.29    6.20
  -3  -1  -3  136.09    5.70
  -3  -1   3  137.99    6.10
   1  -3   3  154.08   12.40
  -1   3   3  129.69    6.70
  -3  -1   3  125.89    6.90
   1  -3   3  128.79    8.40
   3   1   3  128.69    5.80
   1  -3   3  142.19    5.80
   3   1   3  133.99    8.10
  -1   3   3  122.19    6.00
   3   0  -3  238.18   10.80
  -3   0  -3  249.38   14.30
   0  -3  -3  242.68   10.60
   0  -3  -3  259.97   11.90
   0   3  -3  248.38   10.60
   3   0  -3  249.08   11.20
  -3   0  -3  244.38   10.30
   0   3   3  248.68   10.70
  -3   0   3  236.48   10.70
   3   0   3  262.37   13.60
  -3   0   3  264.57   11.30
   0  -3   3  254.47   13.20
   0   3   3  240.48   11.80
   0  -3   3  266.87   17.80
   0  -3   3  255.67   10.60
   3   0   3  250.37   10.30
   1   3  -3  117.19    7.90
   1   3  -3  135.09    5.90
   3  -1  -3  132.79    6.10
  -1  -3  -3  129.29    5.80
  -3   1  -3  126.49    5.40
   3  -1  -3  139.99    6.10
  -1  -3  -3  136.59    7.50
   3  -1  -3  133.59    6.10
  -3   1  -3  125.19    9.90
  -3   1  -3  133.99    5.40
  -3   1   3  116.99    5.90
   3  -1   3  135.69    9.20
  -1  -3   3  125.09    5.90
   1   3   3  133.09    7.30
  -3   1   3  135.19    6.80
   1   3   3  135.89    5.90
  -1  -3   3  123.49    7.80
  -2  -3  -3 1136.19   50.09
   3  -2  -3 1111.09   48.30
   3  -2  -3 1207.98   48.40
  -2  -3  -3 1178.48   47.60
   3  -2  -3 1249.47   48.00
   2   3  -3 1142.29   47.80
  -3   2  -3 1019.70   54.39
   2   3  -3 1114.19   50.09
   3  -2  -3 1167.98   47.90
  -2  -3   3 1212.78   47.90
   2   3   3 1178.88   47.60
   3  -2   3 1254.37   53.59
  -2  -3   3 1143.79   49.90
   2   3   3 1159.08   49.80
   3  -3  -3  343.37   14.40
   3   3  -3  314.17   14.40
   3  -3  -3  362.76   14.60
   3  -3  -3  347.07   16.40
  -3   3  -3  329.07   22.50
   3   3  -3  320.57   16.50
  -3   3  -3  341.77   13.80
  -3  -3  -3  342.57   14.20
   3  -3  -3  368.36   15.50
  -3  -3  -3  324.87   17.20
   3  -3   3  335.97   13.80
   3  -3   3  359.56   20.90
  -3  -3   3  322.07   14.40
   3   3   3  332.97   14.20
  -3  -3   3  325.47   16.50
  -3   3   3  341.07   14.50
   3   3   3  332.37   16.70
  -3   4  -3  743.23   30.70
   4   3  -3  772.92   31.40
  -4  -3  -3  765.92   35.10
   3  -4  -3  784.72   35.90
   4   3  -3  733.23   33.70
   3  -4  -3  680.53   31.30
  -4  -3  -3  754.72   31.00
   3  -4  -3  736.93   32.80
  -3   4  -3  749.53   43.00
   4   3   3  769.92   31.00
  -4  -3   3  792.52   34.00
   3  -4   3  747.33   30.80
   3  -4   3  830.72   41.00
   4   3   3  774.02   34.30
  -3   4   3  783.92   31.40
  -4  -3   3  676.23   31.60
   4   2  -3  528.95   21.60
  -4  -2  -3  527.05   21.10
   4   2  -3  484.85   23.30
   2  -4  -3  514.05   21.40
  -4  -2  -3  510.15   25.20
   2  -4  -3  456.45   26.30
   2  -4   3  522.05   25.40
  -4  -2   3  502.55   21.60
  -2   4   3  502.65   21.50
   4   2   3  484.25   24.10
  -4  -2   3  506.15   23.40
   2  -4   3  515.55   21.10
   4   2   3  526.75   21.10
   2  -4   3  605.34   31.30
   4   1  -3   90.59    5.50
   1  -4  -3   92.49    5.50
   4   1  -3   82.69    4.30
  -1   4  -3   84.99    3.90
   1  -4  -3   85.89    4.10
  -4  -1  -3   87.89    3.80
  -4  -1  -3   95.19    7.60
  -1   4   3   88.69    5.40
  -4  -1   3   85.49    4.30
   1  -4   3  107.79   12.80
  -1   4   3   85.29    4.20
  -4  -1   3   81.69    5.40
   1  -4   3   98.59    7.20
   4   1   3   87.19    6.60
   1  -4   3   79.89    4.00
   0  -4  -3    0.30    0.60
   4   0  -3    0.50    0.80
   0  -4  -3    1.20    1.40
   4   0  -3    1.60    1.10
   0   4  -3    0.30    0.50
  -4   0  -3    1.30    0.30
  -4   0  -3    3.70    2.00
   0  -4   3    2.50    1.80
   4   0   3    0.50    0.30
   0   4   3    1.10    1.10
   0  -4   3    6.70    4.60
  -4   0   3    0.70    0.80
   0   4   3   -0.10    0.70
   4   0   3    1.50    1.70
   0  -4   3    0.90    0.60
  -4   0   3    1.40    0.70
   1   4  -3   80.99    6.50
   4  -1  -3   92.89    4.40
  -4   1  -3   80.19    8.10
   1   4  -3   86.59    4.20
   4  -1  -3   80.09    4.80
  -1  -4  -3   86.99    4.10
  -1  -4  -3   78.69    5.80
  -1  -4   3   85.19    6.40
   4  -1   3  101.79    7.80
   1   4   3   88.79    5.80
  -4   1   3   80.29    4.20
  -1  -4   3   86.79    4.20
  -4   1   3   92.79    5.70
   1   4   3   85.89    4.10
   2   4  -3  508.25   22.00
   4  -2  -3  583.94   23.20
   4  -2  -3  517.45   22.10
  -2  -4  -3  526.75   21.90
   2   4  -3  529.95   25.00
   4  -2  -3  519.45   22.20
  -4   2  -3  450.65   28.30
  -2  -4  -3  533.75   24.70
   4  -2   3  540.75   27.30
   2   4   3  532.95   24.40
  -4   2   3  534.55   25.30
   2   4   3  522.85   21.90
  -2  -4   3  521.05   24.60
  -2  -4   3  520.55   22.00
  -3  -4  -3  775.82   34.80
   4  -3  -3  755.22   31.60
  -4   3  -3  728.13   40.80
   4  -3  -3  748.13   33.40
   3   4  -3  807.72   31.60
   3   4  -3  732.53   34.40
  -3  -4  -3  779.92   31.30
   3   4   3  774.22   34.30
  -3  -4   3  699.13   31.50
   3   4   3  776.12   31.30
   4  -3   3  790.62   38.90
  -3  -4   3  774.12   34.40
  -4   3   3  681.73   38.50
   4   4  -3  961.60   43.50
   4  -4  -3  986.30   40.40
  -4   4  -3  857.01   51.39
  -4  -4  -3 1011.40   44.60
  -4  -4  -3  959.60   40.20
   4  -4  -3 1016.70   40.70
  -4   4  -3  978.70   39.80
   4  -4  -3  984.30   44.10
   4   4  -3 1008.20   40.60
   4  -4  -3  983.90   42.60
   4  -4   3  974.50   48.80
   4   4   3  975.90   43.80
   4   4   3 1010.50   40.20
  -4  -4   3  959.50   40.50
   4  -4   3  978.00   39.80
  -4  -4   3  959.40   43.60
  -4   4   3  967.40   40.60
   4  -5  -3   99.49    9.20
   4  -5  -3  100.89    7.20
  -4   5  -3   84.29   14.50
   5   4  -3  104.49    7.90
  -5  -4  -3   97.19    8.50
   5   4  -3  106.79    5.30
  -4   5  -3  104.49    4.40
   4  -5  -3  111.09    5.10
  -5  -4  -3  101.59    4.90
  -5  -4   3   98.69    5.20
  -5  -4   3   99.79    7.70
  -4   5   3  106.19    5.30
   5   4   3  100.29    4.80
   4  -5   3   97.89    4.60
   4  -5   3  125.89   12.90
   5   4   3   94.99    7.70
   5   3  -3  750.32   33.70
   3  -5  -3  827.82   36.00
   3  -5  -3  784.22   40.30
   5   3  -3  829.82   36.60
  -3   5  -3  797.42   33.10
   3  -5  -3  789.02   33.50
  -5  -3  -3  825.52   38.40
  -3   5  -3  755.02   46.40
  -5  -3  -3  838.02   33.40
   3  -5   3  817.22   33.20
   5   3   3  821.32   33.30
   3  -5   3  908.61   45.20
   3  -5   3  833.22   38.70
  -5  -3   3  760.72   36.30
  -3   5   3  841.02   33.80
   5   3   3  802.82   37.10
  -5  -3   3  800.02   33.70
  -5  -2  -3   56.99    2.80
   5   2  -3   57.59    5.00
  -5  -2  -3   51.99    6.70
   5   2  -3   60.69    3.40
  -2   5  -3   56.69    2.80
   2  -5  -3   53.19    3.10
   2  -5  -3   58.19    4.60
   2  -5  -3   56.39    8.40
   2  -5   3   61.99    7.40
   5   2   3   59.09    2.80
  -5  -2   3   61.19    3.30
   2  -5   3   73.69   11.90
  -5  -2   3   53.49    5.00
   2  -5   3   56.29    2.90
  -2   5   3   55.49    3.20
   1  -5  -3   50.89    4.40
   5   1  -3   46.10    3.00
  -5  -1  -3   50.29    2.40
   5   1  -3   43.80    4.10
  -1   5  -3   51.79    2.60
  -5  -1  -3   61.89    7.40
   1  -5  -3   48.90    2.70
  -5  -1   3   53.99    4.50
  -1   5   3   52.09    2.90
   1  -5   3   54.69   11.20
  -5  -1   3   48.70    2.90
  -1   5   3   49.30    4.30
   5   1   3   49.30    2.40
   5   1   3   48.20    5.80
   1  -5   3   49.20    6.20
   1  -5   3   46.80    2.60
   5   0  -3  836.92   35.50
   0   5  -3  798.22   35.10
   0  -5  -3  881.31   37.80
   0  -5  -3  851.41   35.50
   0   5  -3  779.12   38.90
  -5   0  -3  838.62   40.80
  -5   0  -3  863.71   34.80
   5   0  -3  834.62   36.80
   0  -5   3  889.31   39.20
   5   0   3  874.61   34.70
   0  -5   3  893.81   35.20
   0   5   3  876.31   37.60
   5   0   3  868.71   39.50
   0  -5   3  914.71   47.20
   0   5   3  837.62   35.30
  -5   0   3  802.12   35.70
  -5   0   3  893.31   37.50
   5  -1  -3   47.40    3.10
   1   5  -3   44.80    2.70
  -5   1  -3   45.00    7.60
   1   5  -3   55.69    5.50
   5  -1  -3   50.39    3.80
  -1  -5  -3   57.49    4.90
   1   5   3   51.89    4.70
   1   5   3   50.39    2.80
  -5   1   3   46.90    2.80
  -1  -5   3   43.30    5.50
  -5   1   3   52.49    4.70
  -1  -5   3   56.69    2.90
   5  -2  -3   56.09    4.40
  -2  -5  -3   62.19    5.50
   5  -2  -3   56.99    3.30
  -5   2  -3   44.50    7.80
   2   5  -3   48.50    5.90
   5  -2  -3   61.69    3.50
   2   5  -3   60.69    3.20
   5  -2   3   80.79    9.20
   2   5   3   53.49    3.10
  -2  -5   3   53.09    5.60
  -5   2   3   53.29    5.70
  -2  -5   3   59.69    3.20
   2   5   3   58.39    5.10
   5  -3  -3  861.71   34.30
   3   5  -3  776.62   37.70
  -5   3  -3  735.63   43.20
   5  -3  -3  778.52   34.30
   5  -3  -3  759.52   36.20
  -3  -5  -3  804.12   37.80
  -3  -5  -3  845.62   34.10
   3   5  -3  887.11   34.30
   3   5   3  841.82   34.10
   3   5   3  857.71   37.60
  -3  -5   3  823.12   37.60
  -5   3   3  798.82   40.00
  -3  -5   3  813.62   34.30
   5  -3   3  916.31   41.90
   4   5  -3  105.19    5.30
   4   5  -3  105.69    8.20
  -4  -5  -3  102.79    5.00
   5  -4  -3  113.49    7.90
  -4  -5  -3  101.49    8.30
   5  -4  -3  103.29    5.40
  -5   4  -3   97.99   14.40
   5  -4  -3  105.59    7.30
   5  -4  -3   98.39    5.10
   4   5   3  108.19    5.00
  -4  -5   3   99.09    7.90
  -4  -5   3   93.19    5.20
   4   5   3  109.29    8.10
   5  -4   3  116.09   11.10
  -5  -5  -3    0.50    0.70
   5  -5  -3    2.10    1.20
   5   5  -3    1.30    2.30
   5   5  -3    0.80    1.10
  -5   5  -3    0.60    5.20
   5  -5  -3    1.70    2.00
  -5  -5  -3    3.70    3.30
  -5   5  -3    1.00    0.40
   5  -5  -3    0.40    2.40
  -5  -5   3    1.60    2.50
   5   5   3    1.00    2.10
   5  -5   3    1.10    0.40
   5   5   3    2.20    0.90
   5  -6  -3  389.16   20.10
  -5   6  -3  387.26   15.80
   6   5  -3  384.16   20.70
   6   5  -3  369.16   16.70
  -6  -5  -3  375.06   16.30
  -6  -5  -3  361.36   24.00
  -5   6  -3  356.06   30.30
   5  -6  -3  398.76   23.00
   6   5   3  381.26   16.20
   5  -6   3  379.06   15.80
  -5   6   3  387.46   16.70
  -6  -5   3  375.76   20.60
  -4   6  -3    2.80    0.60
   4  -6  -3   12.30    4.50
   6   4  -3    2.30    1.30
   6   4  -3    0.50    2.10
   4  -6  -3    3.00    2.00
  -6  -4  -3    0.80    2.80
   4  -6   3    1.90    2.80
  -6  -4   3    7.70    2.90
   6   4   3    1.30    0.80
   4  -6   3    3.80    0.70
  -4   6   3    2.00    1.20
  -6  -3  -3   89.49    4.10
   3  -6  -3  101.69    7.00
   6   3  -3   86.49    6.90
  -3   6  -3   78.29    3.80
   6   3  -3   78.89    4.60
   3  -6  -3   69.89    9.90
  -6  -3  -3   76.49    8.10
   3  -6   3   79.69    3.90
  -6  -3   3   80.19    6.70
   6   3   3   82.29    7.30
  -3   6   3   93.19    4.60
   3  -6   3   84.59    8.20
   6   3   3   82.59    4.00
   6   2  -3  360.86   18.50
   2  -6  -3  352.86   15.70
  -2   6  -3  379.46   15.40
   6   2  -3  368.76   16.00
  -6  -2  -3  390.76   21.30
  -6  -2  -3  376.76   15.50
   2  -6  -3  375.66   18.40
  -6  -2   3  353.36   16.00
   6   2   3  353.36   19.50
   2  -6   3  371.26   15.60
  -2   6   3  381.46   15.90
   2  -6   3  324.07   20.10
   6   2   3  370.76   15.40
   2  -6   3  376.56   26.80
  -2   6   3  364.06   18.50
  -6  -2   3  403.06   19.00
   1  -6  -3  657.73   27.50
   1  -6  -3  683.83   30.40
  -6  -1  -3  650.33   33.30
   6   1  -3  652.73   30.00
   6   1  -3  639.64   27.80
  -6  -1  -3  668.13   27.10
  -1   6  -3  623.74   27.30
  -1   6   3  659.23   27.60
   1  -6   3  690.53   32.40
  -1   6   3  666.23   30.40
  -6  -1   3  644.24   30.30
   1  -6   3  681.43   40.40
   6   1   3  664.03   27.10
  -6  -1   3  655.83   27.70
   6   1   3  672.03   31.80
   1  -6   3  672.43   27.40
   0   6  -3  361.36   15.90
   0   6  -3  370.16   20.40
   0  -6  -3  359.26   16.00
  -6   0  -3  389.26   15.60
   6   0  -3  394.66   18.30
   0  -6  -3  381.96   19.00
   6   0  -3  370.76   16.40
  -6   0  -3  351.66   21.60
   0  -6   3  393.76   16.10
   6   0   3  378.96   20.50
   0  -6   3  316.47   26.00
   0   6   3  378.46   16.10
   6   0   3  378.26   15.50
   0   6   3  387.16   19.00
   0  -6   3  376.06   20.20
  -6   0   3  393.46   19.00
  -6   0   3  383.66   16.30
   1   6  -3  620.14   27.90
  -6   1  -3  625.24   34.90
  -1  -6  -3  662.63   31.30
   1   6  -3  652.53   32.40
   6  -1  -3  671.33   28.30
   6  -1  -3  617.04   29.80
  -1  -6  -3  653.93   28.00
  -6   1  -3  676.13   27.30
   6  -1   3  654.53   33.10
   6  -1   3  674.73   27.30
  -6   1   3  663.53   31.40
  -1  -6   3  758.72   28.20
   1   6   3  675.53   31.00
  -6   1   3  661.13   28.10
   1   6   3  704.23   28.10
  -1  -6   3  775.72   32.80
   2   6  -3  380.86   15.80
   6  -2  -3  376.66   16.10
   2   6  -3  352.06   19.70
   6  -2  -3  353.06   15.90
  -2  -6  -3  360.96   15.70
  -6   2  -3  377.76   23.70
   6  -2  -3  397.06   18.00
  -2  -6  -3  348.77   19.10
  -2  -6   3  360.76   15.80
   6  -2   3  367.36   21.30
   2   6   3  368.76   18.80
  -2  -6   3  367.06   19.50
  -6   2   3  358.16   20.00
   2   6   3  372.86   15.70
   3   6  -3   74.59    7.30
  -6   3  -3   74.69   11.70
   6  -3  -3   79.39    4.40
  -3  -6  -3   86.99    7.40
   6  -3  -3   78.69    6.40
  -3  -6  -3   87.39    4.30
   3   6  -3   84.69    4.40
   6  -3  -3   79.49    4.70
  -3  -6   3   81.09    4.40
  -6   3   3   93.59    9.50
   3   6   3   85.49    4.30
   3   6   3   89.89    7.10
  -3  -6   3   89.29    7.50
  -4  -6  -3    0.90    0.90
  -6   4  -3   -4.10    3.70
   4   6  -3    5.10    2.40
   6  -4  -3    5.20    2.50
   4   6  -3    1.60    1.10
   6  -4  -3    2.60    1.30
  -4  -6  -3   -0.50    1.70
   4   6   3    4.00    1.00
  -6   4   3    1.10    3.80
   4   6   3    5.80    2.70
  -4  -6   3    2.20    2.60
   5   6  -3  367.96   16.30
   6  -5  -3  375.96   20.70
  -5  -6  -3  395.56   21.40
   6  -5  -3  377.56   16.50
  -6   5  -3  350.66   28.60
   6  -5  -3  364.76   19.50
   6  -5   3  371.36   15.30
   6  -5   3  360.26   15.30
  -5  -6   3  391.26   20.80
   5   6   3  378.56   16.00
  -6   6  -3  166.78   23.70
  -6  -6  -3  228.58   15.80
   6  -6  -3  242.58   11.00
   6  -6  -3  216.38   14.00
   6   6  -3  248.08   10.90
   6  -6  -3  230.88   15.90
   6   6   3  231.28   10.40
   6  -6   3  231.68    9.80
  -6  -6   3  238.78   15.30
   6  -7  -3  299.67   13.10
   7   6  -3  284.27   13.00
  -6   7  -3  272.97   12.00
  -6   7  -3  231.88   29.70
  -7  -6  -3  314.57   19.40
   6  -7  -3  269.07   19.30
   6  -7  -3  280.87   16.90
   7   6   3  278.47   12.50
  -7  -6   3  281.57   17.60
   6  -7   3  286.67   12.00
   6  -7   3  300.37   19.50
  -6   7   3  282.57   13.00
   7   5  -3  223.88   10.80
   5  -7  -3  231.38   17.80
   5  -7  -3  220.88   14.10
  -7  -5  -3  226.78   16.10
  -5   7  -3  225.58    9.90
  -7  -5   3  257.57   15.30
   5  -7   3  227.78   16.30
   7   5   3  228.58   10.30
  -5   7   3  241.48   10.80
   5  -7   3  233.08    9.90
  -7  -4  -3   44.30    7.50
   7   4  -3   37.70    5.70
   4  -7  -3   49.30    6.40
   4  -7  -3   38.60    8.10
  -7  -4  -3   50.89    2.90
  -4   7  -3   47.30    2.50
   7   4  -3   48.90    3.50
   4  -7   3   47.80    2.60
  -7  -4   3   50.89    6.80
   4  -7   3   41.10    7.30
  -4   7   3   47.10    3.30
   7   4   3   50.39    2.90
  -7  -3  -3  125.09   14.90
   7   3  -3  101.19    7.70
   7   3  -3   83.69    5.40
  -3   7  -3   88.39    4.20
   3  -7  -3   86.59   13.00
  -7  -3  -3   87.29    4.40
   3  -7  -3   89.49    7.30
   3  -7   3   83.69    4.30
  -7  -3   3   87.59    7.70
   3  -7   3   88.89   12.00
   7   3   3   92.49    4.40
  -2   7  -3   77.29    3.60
  -7  -2  -3   83.89   10.30
  -7  -2  -3   74.59    3.60
   7   2  -3   66.39    6.30
   7   2  -3   75.79    4.40
   2  -7  -3   74.09    6.60
   7   2   3   72.09    3.60
   2  -7   3   81.99    8.10
   2  -7   3   74.19    3.80
  -2   7   3   68.39    4.00
  -2   7   3   67.69    6.40
  -7  -2   3   68.79    6.60
   1  -7  -3  665.53   30.70
   7   1  -3  644.84   27.50
  -7  -1  -3  656.13   34.00
  -7  -1  -3  648.04   26.80
   7   1  -3  620.74   30.00
  -1   7  -3  631.84   26.90
  -1   7   3  671.43   27.30
  -1   7   3  605.24   30.40
   1  -7   3  631.24   27.10
  -7  -1   3  702.43   31.20
   7   1   3  658.53   26.70
   1  -7   3  674.73   32.60
   7   0  -3  393.96   20.50
  -7   0  -3  428.66   17.60
   7   0  -3  456.25   18.60
  -7   0  -3  420.96   25.00
   0  -7  -3  467.05   22.10
   0   7  -3  434.66   18.00
  -7   0   3  379.86   21.40
   0  -7   3  414.16   22.90
   0  -7   3  417.86   18.10
   0   7   3  442.46   21.90
   0   7   3  426.06   18.20
  -7   1  -3  657.73   35.70
  -7   1  -3  649.43   26.70
   7  -1  -3  700.63   30.20
   7  -1  -3  656.73   27.80
  -1  -7  -3  666.73   31.40
   1   7  -3  622.74   27.30
   1   7   3  651.43   27.40
   7  -1   3  659.23   26.70
  -7   1   3  609.34   31.50
  -1  -7   3  662.43   27.50
   1   7   3  656.23   31.10
  -1  -7   3  677.23   32.30
  -2  -7  -3   88.79    7.60
   7  -2  -3   75.29    4.50
  -7   2  -3   72.89   11.50
   2   7  -3   69.59    4.10
   7  -2  -3   68.99    6.00
  -2  -7   3   73.19    4.20
   2   7   3   75.79    4.10
  -2  -7   3   76.19    7.50
   2   7   3   74.79    6.80
  -7   2   3   89.49    8.50
   3   7  -3   88.69    4.80
   7  -3  -3   93.99    5.20
  -7   3  -3   82.19   13.30
   7  -3  -3  102.19    7.40
  -3  -7  -3   86.79    8.10
  -3  -7   3   96.49    8.40
  -7   3   3   92.39   11.30
   3   7   3   80.39    8.10
   3   7   3   91.39    4.70
   7  -4  -3   41.00    3.80
  -4  -7  -3   59.99    7.80
   7  -4  -3   50.89    6.40
   4   7  -3   44.30    3.20
  -7   4  -3   43.30   11.20
  -7   4   3   39.00    8.40
  -4  -7   3   49.20    7.00
   4   7   3   46.10    3.30
   5   7  -3  221.48   10.40
   7  -5  -3  236.08   10.70
   7  -5  -3  230.28   14.60
  -7   5  -3  214.78   21.20
  -5  -7  -3  253.17   15.70
   7  -5   3  218.38    9.20
   7  -5   3  223.78    9.30
   5   7   3  221.38   10.20
  -5  -7   3  220.98   14.90
  -7   5   3  225.58   19.60
   6   7  -3  282.07   12.50
  -7   6  -3  255.27   25.40
   7  -6  -3  255.77   16.10
  -6  -7  -3  255.17   17.70
   7  -6  -3  262.27   17.60
   7  -6  -3  265.87   12.60
   6   7   3  290.17   12.20
   7  -6   3  262.57   11.30
  -6  -7   3  291.07   17.50
   7  -6   3  273.17   11.50
   7  -7  -3  642.74   27.30
   7   7  -3  621.44   27.10
  -7  -7  -3  617.74   33.70
   7  -7  -3  651.83   34.80
   7  -7  -3  640.44   31.90
  -7   7  -3  569.84   43.70
   7  -7   3  605.14   26.00
   7   7   3  640.84   26.70
  -7  -7   3  676.73   33.10
   7  -8  -3   62.19    4.60
  -8  -7  -3   69.19   10.40
   7  -8  -3   57.79    9.00
  -7   8  -3   59.79    3.10
   8   7  -3   53.39    4.30
   7  -8   3   58.39    9.90
   8   7   3   61.79    3.90
  -8  -7   3   53.39    8.30
   7  -8   3   56.79    3.10
   6  -8  -3  484.35   25.00
  -6   8  -3  452.25   19.20
  -8  -6  -3  428.46   27.00
   8   6  -3  483.25   20.30
   8   6   3  445.56   19.70
   6  -8   3  486.85   27.70
  -6   8   3  449.76   20.10
   6  -8   3  452.45   19.20
  -8  -6   3  466.25   25.60
   5  -8  -3    5.90    3.40
  -8  -5  -3    4.70    3.40
   5  -8  -3    1.00    5.40
   8   5  -3    9.20    2.10
  -5   8  -3    9.40    1.10
   5  -8   3    7.80    1.10
   8   5   3    7.30    1.40
  -5   8   3    8.70    1.90
   5  -8   3   15.10    5.60
  -8  -5   3    1.80    3.10
   8   4  -3   47.20    3.50
   4  -8  -3   40.70    9.50
   4  -8  -3   54.29    6.90
  -8  -4  -3   59.19    9.30
  -4   8  -3   46.50    2.70
  -8  -4  -3   48.70    3.00
   8   4   3   45.90    2.90
   4  -8   3   42.30    2.70
  -4   8   3   44.50    3.30
   4  -8   3   55.19    8.30
  -8  -4   3   57.49    7.40
  -3   8  -3  311.17   12.70
   3  -8  -3  286.87   16.90
   3  -8  -3  294.67   23.90
  -8  -3  -3  269.87   19.20
   8   3  -3  303.47   18.90
   8   3  -3  321.97   13.60
   8   3   3  284.97   12.70
   3  -8   3  286.67   12.80
  -3   8   3  307.07   13.30
  -8  -3   3  284.27   17.30
   3  -8   3  288.07   19.10
   2  -8  -3    1.00    2.60
  -8  -2  -3    0.10    0.70
  -2   8  -3    0.30    0.80
   2  -8  -3    4.80    5.70
   8   2  -3    2.20    2.50
  -8  -2  -3   -1.50    2.80
   8   2  -3   -0.40    1.20
   2  -8   3    3.80    3.30
   8   2   3    1.00    0.70
  -8  -2   3    2.00    2.80
  -2   8   3    1.00    1.10
  -2   8   3    0.90    2.20
   2  -8   3   -0.40    0.80
   8   1  -3   77.39    4.50
  -1   8  -3   74.79    3.90
  -8  -1  -3   71.79    3.60
   8   1  -3   75.89    6.70
   1  -8  -3   74.69    7.30
  -8  -1  -3   81.29   10.70
   1  -8   3   83.09    8.20
   8   1   3   74.29    3.60
   1  -8   3   66.99    3.90
  -1   8   3   75.29    7.10
  -8  -1   3   82.59    7.90
  -1   8   3   75.79    4.30
   8   0  -3  895.01   40.90
   8   0  -3  888.71   36.70
   0  -8  -3  850.31   40.30
   0   8  -3  869.11   35.80
  -8   0  -3  843.62   44.30
  -8   0  -3  870.61   35.40
  -8   0   3  860.21   40.80
   8   0   3  856.61   35.30
   0   8   3  861.61   40.20
   0   8   3  879.21   36.00
   0  -8   3  844.62   35.90
   0  -8   3  816.22   41.30
  -8   1  -3   78.09   11.60
   1   8  -3   75.79    4.00
   8  -1  -3   87.89    5.60
  -8   1  -3   69.59    3.30
   8  -1  -3   72.49    6.40
  -1  -8  -3   77.19    8.60
   1   8   3   67.79    4.10
   1   8   3   73.69    7.10
  -1  -8   3   82.59    8.30
   8  -1   3   71.39    3.20
  -8   1   3   65.19    8.20
  -2  -8  -3    0.40    2.70
   8  -2  -3   -1.60    1.20
  -8   2  -3    1.90    4.40
   8  -2  -3    0.60    2.10
   2   8  -3    0.10    1.10
  -8   2   3   -0.80    3.00
   2   8   3   -0.10    1.10
   8  -2   3    0.30    0.30
   8  -2   3    0.30    0.30
  -2  -8   3   -1.90    2.40
   8  -3  -3  268.77   16.40
   3   8  -3  320.07   13.40
   8  -3  -3  291.87   13.60
  -8   3  -3  295.37   23.20
  -8   3   3  306.07   20.50
   3   8   3  295.67   13.20
  -3  -8   3  323.67   18.50
  -4  -8  -3   42.30    7.00
   4   8  -3   52.99    3.40
  -8   4  -3   36.20   10.80
   8  -4  -3   46.20    6.40
   8  -4  -3   44.40    3.60
  -4  -8   3   43.80    7.00
   4   8   3   51.19    3.30
  -8   4   3   36.70    9.10
  -8   5  -3   12.00    8.10
   8  -5  -3    5.90    2.00
   5   8  -3    8.10    1.90
   8  -5  -3    8.70    3.70
  -5  -8  -3   10.60    4.60
  -8   5   3   11.10    6.70
   5   8   3    6.40    1.60
  -5  -8   3    9.60    4.80
  -8   6  -3  387.66   34.70
   6   8  -3  472.85   19.80
   8  -6  -3  463.85   20.00
  -6  -8  -3  473.95   26.40
   8  -6  -3  430.46   24.10
   8  -6  -3  448.66   25.40
  -6  -8   3  438.56   25.20
   8  -6   3  461.65   18.50
   6   8   3  434.86   19.40
  -8   6   3  465.85   32.10
   8  -6   3  437.56   18.40
   8  -7  -3   59.89    8.30
   7   8  -3   57.29    4.20
  -8   7  -3   47.50   12.70
   8  -7  -3   56.49    4.40
  -7  -8  -3   52.89    9.20
   8  -7   3   51.09    2.80
   7   8   3   62.29    3.90
  -7  -8   3   60.09    8.80
   8  -7   3   55.29    2.70
  -8  -8  -3    1.50    4.30
   8   8  -3    7.60    2.20
  -8   8  -3   13.80   10.90
   8  -8  -3   12.30    5.10
   8  -8  -3    6.80    2.20
  -8  -8   3    3.50    4.50
   8   8   3    7.80    1.90
   8  -8   3    5.30    0.90
   8  -8   3   10.60    6.20
   8  -8   3    5.60    1.00
   8  -9  -3   90.49   10.80
  -9  -8  -3   69.69   11.00
   8  -9  -3   84.89    5.50
   9   8  -3   75.89    5.30
   8  -9   3   69.39    3.90
   9   8   3   78.79    4.80
  -9  -8   3   73.99   10.10
   8  -9   3   99.99   13.90
   8  -9   3   73.49    3.80
   7  -9  -3   19.10    2.70
  -7   9  -3   20.10    1.80
   9   7  -3   17.40    2.70
  -9  -7  -3   11.20    5.70
   7  -9  -3   19.90    5.30
  -9  -7   3   17.00    5.90
  -7   9   3   20.10    2.80
   7  -9   3   17.70    1.70
   7  -9   3   13.50    6.40
   9   7   3   21.50    2.50
   9   6  -3   -0.90    1.60
  -9  -6  -3    2.60    3.50
   6  -9  -3    2.50    3.60
  -6   9  -3    1.00    0.90
   6  -9   3   -0.20    0.80
   9   6   3    0.10    1.30
  -9  -6   3   -4.70    3.10
   6  -9   3   -2.10    3.90
  -6   9   3   -0.60    1.40
  -9  -5  -3  274.07   19.60
   9   5  -3  252.27   12.30
  -5   9  -3  266.77   11.30
   5  -9  -3  272.77   18.80
  -9  -5   3  257.97   17.20
   5  -9   3  259.27   18.80
  -5   9   3  256.57   12.00
   9   5   3  249.97   11.60
   4  -9  -3  268.27   16.10
  -9  -4  -3  222.58   17.80
  -4   9  -3  245.88   10.80
   9   4  -3  251.27   11.70
   9   4   3  249.58   11.00
  -4   9   3  235.28   11.40
  -9  -4   3  267.87   16.90
   4  -9   3  246.68   10.90
   4  -9   3  238.98   17.60
   3  -9  -3  253.17   15.20
  -9  -3  -3  217.68   17.30
   9   3  -3  228.48   10.90
  -3   9  -3  222.38   10.00
  -9  -3  -3  228.38   10.10
   3  -9   3  259.57   17.40
   9   3   3  222.08   10.00
   3  -9   3  220.28   10.10
  -9  -3   3  222.48   17.00
  -3   9   3  222.08   10.50
   9   2  -3  255.77   11.40
  -2   9  -3  234.78   10.50
  -9  -2  -3  224.18   17.70
   2  -9  -3  220.48   14.80
  -9  -2  -3  231.98   10.40
   2  -9   3  225.18   16.50
  -2   9   3  243.78   11.00
   2  -9   3  242.38   10.70
   9   2   3  235.78   10.40
  -9  -2   3  256.97   16.00
   1  -9  -3   51.09    7.10
   9   1  -3   44.60    3.40
  -9  -1  -3   34.10    7.90
  -1   9  -3   35.30    2.70
  -9  -1  -3   41.50    2.40
   9   1  -3   44.70    6.20
  -9  -1   3   38.90    6.60
  -1   9   3   36.40    3.00
   1  -9   3   35.00    6.80
   9   1   3   41.70    2.40
   0   9  -3   35.30    2.50
   9   0  -3   33.00    5.10
  -9   0  -3   31.30    1.90
  -9   0  -3   23.70    7.20
   0  -9  -3   37.40    6.10
   9   0  -3   30.40    3.10
   0  -9   3   29.20    6.00
  -9   0   3   29.40    6.10
   0   9   3   31.90    2.80
   9   0   3   31.10    1.90
   9  -1  -3   46.10    3.60
  -9   1  -3   42.30    2.10
   9  -1  -3   31.80    5.10
  -9   1  -3   41.20    9.50
   1   9  -3   45.30    3.00
  -9   1   3   37.00    7.10
   1   9   3   40.00    3.10
   9  -1   3   43.60    2.20
  -1  -9   3   40.00    6.70
   2   9  -3  231.88   10.90
  -9   2  -3  243.08   20.30
  -2  -9  -3  257.97   16.20
   9  -2  -3  238.68   14.50
   9  -2  -3  235.48   11.30
   9  -2   3  246.18   10.00
   9  -2   3  238.08   10.00
  -9   2   3  250.87   17.50
   2   9   3  243.38   11.00
  -2  -9   3  239.88   16.10
   9  -3  -3  208.28   13.60
   3   9  -3  208.38   10.20
  -9   3  -3  209.78   20.20
   9  -3  -3  218.08   10.60
  -3  -9  -3  243.08   15.70
  -9   3   3  209.88   17.50
   3   9   3  226.48   10.20
  -3  -9   3  245.98   15.90
   9  -4  -3  219.58   14.90
  -4  -9  -3  236.58   16.50
   9  -4  -3  228.28   11.40
   4   9  -3  247.68   11.20
  -9   4  -3  228.98   22.20
  -4  -9   3  243.98   16.70
   4   9   3  249.68   11.10
  -9   4   3  269.97   20.90
  -9   5  -3  273.87   26.10
   5   9  -3  253.07   12.00
  -5  -9  -3  248.38   17.40
   9  -5  -3  260.67   12.30
  -5  -9   3  263.87   17.70
  -9   5   3  276.67   23.10
   5   9   3  257.37   11.80
   9  -6  -3   -1.00    1.60
  -9   6  -3  -10.50    6.60
  -6  -9  -3    0.10    3.70
   6   9  -3    0.00    1.50
  -6  -9   3   -4.10    3.30
   6   9   3    0.40    1.40
   9  -6   3    1.10    0.40
   9  -6   3    0.00    0.40
  -9   6   3    2.10    7.10
   9  -7  -3   16.80    2.90
  -7  -9  -3   16.10    5.90
   7   9  -3   15.90    2.60
   9  -7  -3   19.80    4.80
  -9   7  -3   25.50   11.40
  -7  -9   3   10.40    5.50
   7   9   3   20.80    2.50
   9  -8  -3   93.09   11.10
  -8  -9  -3   76.79   11.10
  -9   8  -3   85.69   19.60
   9  -8  -3   88.59    5.70
   8   9  -3   82.89    5.40
   9  -8   3   73.99    3.80
   8   9   3   75.79    4.90
   9  -8   3   74.29    3.70
  -8  -9   3   79.99   11.00
  -9  -9  -3   93.89   13.10
   9  -9  -3   85.09    6.10
   9  -9  -3  110.69   12.50
   9  -9   3   87.29    4.40
   9   9   3  105.99    5.70
   9  -9   3   84.89    4.40
  -9  -9   3  108.39   13.00
 -10  -9  -3   50.89   10.40
   9 -10  -3   46.60    4.50
  10   9  -3   61.19    5.00
   9 -10  -3   46.50    8.00
   9 -10   3   70.19   13.20
   9 -10   3   51.89    3.20
  10   9   3   57.29    4.40
   8 -10  -3   50.49    8.40
 -10  -8  -3   79.29   20.00
   8 -10  -3   57.89    4.90
  10   8   3   58.79    4.10
   8 -10   3   44.90   15.90
 -10  -8   3   58.09    9.30
   8 -10   3   52.19    3.30
  -7  10  -3    0.70    1.00
 -10  -7  -3   -2.30    4.00
   7 -10  -3    1.90    3.70
  10   7  -3    0.00    1.70
 -10  -7   3    3.70    5.10
   7 -10   3   -3.40    4.40
  -7  10   3   -0.50    1.60
   7 -10   3    0.70    1.00
  10   7   3    0.30    1.50
  -6  10  -3   66.39    3.60
  10   6  -3   60.59    4.80
 -10  -6  -3   69.79   11.50
   6 -10  -3   86.79   10.70
 -10  -6   3   72.79   10.00
  -6  10   3   67.99    4.60
  10   6   3   59.79    4.10
   6 -10   3   55.49    3.50
   6 -10   3   62.49   10.80
   5 -10  -3   28.20    6.50
  10   5  -3   40.20    3.90
 -10  -5  -3   43.10    9.60
  -5  10  -3   36.30    2.60
   5 -10   3   38.00    2.70
  -5  10   3   39.50    3.60
  10   5   3   42.20    3.10
   5 -10   3   47.00    9.00
 -10  -5   3   44.10    8.10
   4 -10  -3  458.85   25.50
  -4  10  -3  464.75   19.40
  10   4  -3  456.35   20.30
 -10  -4  -3  454.15   28.80
   4 -10   3  457.95   27.50
  10   4   3  460.55   19.60
  -4  10   3  451.35   20.00
 -10  -4   3  443.56   26.10
  -3  10  -3  182.18    8.00
   3 -10  -3  191.28   13.50
  10   3  -3  167.68    8.90
 -10  -3  -3  164.78    8.00
 -10  -3  -3  170.58   15.70
   3 -10   3  172.48   14.70
 -10  -3   3  183.98   13.80
  -3  10   3  172.48    8.60
  10   3   3  170.98    8.00
 -10  -2  -3  265.07   20.70
   2 -10  -3  292.37   17.90
 -10  -2  -3  283.17   12.40
  -2  10  -3  287.47   12.80
  10   2  -3  288.07   13.30
   2 -10   3  271.87   19.30
 -10  -2   3  271.07   18.40
  -2  10   3  294.77   13.00
  10   2   3  279.57   12.30
 -10  -1  -3   37.70    2.40
 -10  -1  -3   32.70    8.30
   1 -10  -3   45.30    7.30
  -1  10  -3   43.20    2.90
  10   1  -3   42.30    3.60
  -1  10   3   39.80    3.20
  10   1   3   36.40    2.40
   1 -10   3   53.79    8.80
  10   0  -3  138.09    7.50
   0  10  -3  138.29    6.90
   0 -10  -3  158.28   12.30
 -10   0  -3  146.69    6.40
 -10   0  -3  124.59   16.00
   0 -10   3  138.09   12.40
   0  10   3  144.79    7.20
 -10   0   3  149.59   12.60
  10   0   3  135.19    6.30
   1  10  -3   38.30    3.10
  10  -1  -3   46.60    3.80
 -10   1  -3   41.90   10.00
 -10   1  -3   43.20    2.20
  -1 -10  -3   55.49    8.30
   1  10   3   45.30    3.40
  -1 -10   3   37.50    7.30
  10  -1   3   40.20    2.20
 -10   1   3   36.40    7.20
   2  10  -3  288.07   13.00
  -2 -10  -3  282.77   18.50
 -10   2  -3  265.87   23.00
  10  -2  -3  288.57   13.50
  -2 -10   3  303.27   19.20
  10  -2   3  297.27   12.20
 -10   2   3  275.17   20.30
   2  10   3  287.17   13.10
  -3 -10  -3  173.38   13.80
   3  10  -3  168.48    8.30
 -10   3  -3  160.08   21.00
  10  -3  -3  169.18    8.70
  10  -3   3  165.78    7.00
  10  -3   3  175.38    7.00
 -10   3   3  167.88   16.40
   3  10   3  165.18    8.30
  -3 -10   3  172.68   14.00
   4  10  -3  479.45   19.90
 -10   4  -3  422.76   33.10
  -4 -10  -3  439.06   26.20
  10  -4  -3  429.36   20.10
  -4 -10   3  445.36   26.60
 -10   4   3  482.75   32.10
   4  10   3  459.45   19.80
  -5 -10  -3   17.00    5.50
 -10   5  -3   11.80    9.00
   5  10  -3   31.10    3.20
  10  -5  -3   28.30    3.30
 -10   5   3   44.30   11.80
  -5 -10   3   39.10    8.00
   5  10   3   42.00    3.30
  10  -6  -3   63.39    4.90
  -6 -10  -3   58.49    9.90
 -10   6  -3   66.89   16.50
   6  10  -3   61.39    4.60
   6  10   3   61.19    4.40
 -10   6   3   89.69   16.30
  -6 -10   3   84.99   11.10
  -7 -10  -3    0.80    3.90
   7  10  -3    0.80    1.80
 -10   7  -3   -2.80    6.90
  10  -7  -3   -0.60    1.90
  10  -7  -3   -2.30    3.70
  10  -7   3    0.00    0.50
   7  10   3   -0.10    1.70
  -7 -10   3   -1.40    3.40
   8  10  -3   56.69    5.60
  10  -8  -3   49.50    8.90
  10  -8  -3   56.29    4.80
  -8 -10  -3   63.19   11.30
   8  10   3   62.59    4.50
  10  -8   3   51.79    3.10
  10  -8   3   56.19    2.80
  -8 -10   3   60.49   10.50
 -10   9  -3   21.20   14.50
   9  10  -3   44.50    4.30
  -9 -10  -3   38.80    9.60
  10  -9  -3   57.19    9.80
  10  -9  -3   49.00    4.80
  -9 -10   3   43.20    8.90
   9  10   3   66.79    6.30
  10  -9   3   48.80    2.80
  10  -9   3   47.10   10.60
  10  -9   3   51.49    3.20
 -10 -10  -3  256.47   21.10
  10 -10  -3  243.28   14.40
  10 -10  -3  241.28   18.00
  10  10  -3  235.58   11.70
  10  10   3  242.38   11.30
  10 -10   3  197.68    9.90
  10 -10   3  232.98   20.90
  11  10  -3   31.60    3.90
 -11 -10  -3   19.70    8.00
  10 -11  -3   35.70    8.20
  10 -11  -3   33.90    3.90
 -11 -10   3   26.40    8.20
  10 -11   3   22.80    8.40
  11  10   3   29.90    3.40
  10 -11   3   25.80    2.30
 -11  -9  -3  137.79   18.10
   9 -11  -3  160.18   14.10
   9 -11  -3  152.98    8.50
  11   9  -3  142.39    8.40
   9 -11   3  145.09   17.60
  11   9   3  150.28    7.90
   9 -11   3  133.39    6.80
   8 -11  -3    5.90    2.60
  -8  11  -3    8.90    1.60
  11   8  -3    5.50    2.60
 -11  -8  -3    7.60    5.90
   8 -11  -3   11.30    5.20
  11   8   3    2.50    2.00
   8 -11   3   10.40    7.70
  -7  11  -3   15.60    1.90
   7 -11  -3   13.70    5.50
  11   7  -3   15.30    2.90
 -11  -7  -3   12.80    7.10
   7 -11   3   15.10    6.90
  11   7   3   18.30    2.50
 -11  -7   3   21.10    6.70
  -7  11   3   22.70    3.20
  11   6  -3   55.09    4.90
   6 -11  -3   79.59   10.30
  -6  11  -3   67.29    3.90
 -11  -6  -3   65.39   12.30
  -6  11   3   73.89    5.00
 -11  -6   3   70.99   10.80
  11   6   3   60.99    4.30
   6 -11   3   77.29   12.00
   5 -11  -3    4.50    4.50
 -11  -5  -3    5.60    5.90
  11   5  -3    4.50    2.20
  -5  11  -3    4.60    1.50
 -11  -5   3    2.30    4.20
  11   5   3    3.10    1.50
  -5  11   3    4.30    2.10
   5 -11   3    4.10    5.10
   4 -11  -3   54.59    8.70
  11   4  -3   52.19    4.40
 -11  -4  -3   62.79   11.50
  -4  11  -3   57.49    3.40
  -4  11   3   48.80    4.10
   4 -11   3   45.20    9.10
 -11  -4   3   48.60    9.20
  11   4   3   52.29    3.60
   3 -11  -3  452.35   25.80
 -11  -3  -3  413.96   29.00
  -3  11  -3  453.35   19.20
  11   3  -3  470.55   20.20
   3 -11   3  409.96   26.90
 -11  -3   3  429.16   26.50
  -3  11   3  453.65   19.80
  11   3   3  462.75   19.20
  11   2  -3   16.50    2.60
   2 -11  -3   13.00    5.10
 -11  -2  -3   14.80    6.10
  -2  11  -3   20.60    2.20
 -11  -2  -3   21.70    2.00
   2 -11   3   29.20    7.80
  -2  11   3   15.70    2.40
 -11  -2   3   28.30    6.80
  11   2   3   19.10    1.90
 -11  -1  -3    7.80    5.90
  11   1  -3    4.70    2.10
   1 -11  -3    4.20    4.30
  -1  11  -3    6.90    1.60
 -11  -1  -3    4.40    1.10
  -1  11   3    4.40    1.70
 -11  -1   3   -2.30    3.20
   1 -11   3    2.80    4.40
  11   1   3    4.30    1.00
   0  11  -3   99.19    5.30
  11   0  -3  109.39    6.10
   0 -11  -3   91.69   11.20
 -11   0  -3  102.19    4.70
 -11   0  -3   85.99   14.30
  11   0   3   94.99    4.70
   0  11   3   95.19    5.70
   0 -11   3  109.09   11.30
 -11   0   3   78.69   11.10
 -11   1  -3    2.70    4.90
  11  -1  -3    3.90    1.80
  -1 -11  -3    6.80    4.80
   1  11  -3    3.40    1.60
  11  -1   3    2.50    0.70
 -11   1   3    9.00    5.40
  -1 -11   3    4.10    4.80
   1  11   3    3.00    1.70
  11  -1   3    4.00    0.90
 -11   2  -3   17.70    7.40
  11  -2  -3   16.80    2.60
   2  11  -3   14.60    2.20
  -2 -11  -3   27.30    6.20
   2  11   3   15.40    2.20
 -11   2   3   14.40    6.30
  -2 -11   3   14.80    5.50
  11  -2   3   15.70    1.20
  11  -2   3   15.00    1.20
  -3 -11  -3  452.85   26.30
   3  11  -3  448.76   19.50
  11  -3  -3  438.16   20.00
 -11   3  -3  383.46   31.90
 -11   3   3  361.66   28.40
   3  11   3  454.05   19.60
  -3 -11   3  501.75   27.60
  11  -3   3  439.06   18.20
  11  -3   3  464.45   18.20
  -4 -11  -3   47.50    8.60
   4  11  -3   61.49    4.30
 -11   4  -3   40.40   11.80
  11  -4  -3   62.19    4.70
  -4 -11   3   63.09   10.50
   4  11   3   48.40    4.10
 -11   4   3   57.49   12.70
 -11   5  -3   -6.90    6.60
  11  -5  -3    3.30    2.10
  -5 -11  -3    3.80    4.60
   5  11  -3    3.80    2.00
 -11   5   3   -3.50    7.00
   5  11   3    5.80    2.10
  -5 -11   3   10.40    5.90
   6  11  -3   64.79    4.80
  11  -6  -3   52.39    4.90
 -11   6  -3   58.79   16.30
  -6 -11  -3   61.49   10.10
   6  11   3   66.09    4.60
 -11   6   3   78.49   16.40
  -6 -11   3   84.39   11.50
  11  -7  -3   19.80    3.00
 -11   7  -3   14.00   12.70
  -7 -11  -3   13.30    9.80
  11  -7  -3   11.90    5.10
   7  11  -3   20.00    2.90
 -11   7   3    2.10   10.00
  -7 -11   3   32.10    9.30
   7  11   3   16.90    3.70
   8  11  -3    6.10    2.40
 -11   8  -3   10.20   12.20
  11  -8  -3    6.10    2.60
  11  -8  -3    1.20    4.40
  -8 -11  -3   12.20    6.30
  11  -8   3    5.00    0.50
   8  11   3    5.00    2.30
  11  -8   3    4.70    0.60
  -8 -11   3   17.30    6.60
  -9 -11  -3  133.09   16.70
  11  -9  -3  123.49   12.90
   9  11  -3  148.99    8.40
  11  -9  -3  157.68    8.90
 -11   9  -3  115.19   24.40
   9  11   3  153.28    8.20
  -9 -11   3  132.49   15.60
  11  -9   3  159.88   16.60
  10  11  -3   26.00    3.50
  11 -10  -3   35.40    4.10
 -10 -11  -3   24.90    8.90
  11 -10  -3   27.70    7.80
 -10 -11   3   24.80    8.60
  10  11   3   31.70    3.70
  11 -10   3   21.60    8.20
 -11 -11  -3   -6.70    6.10
  11  11  -3    4.80    2.50
  11 -11  -3    0.10    2.60
  11 -11  -3   -4.90    5.30
  11  11   3   -1.30    2.20
 -11 -11   3   -8.60    5.40
  11 -11   3   -7.40    7.00
  11 -12  -3   13.50    7.30
 -12 -11  -3   14.50   11.20
  12  11  -3   12.30    3.40
  11 -12  -3    1.80    2.60
 -12 -11   3   -7.70    6.70
  11 -12   3    5.80    8.80
  12  11   3    6.90    2.70
  12  10  -3    4.20    2.70
 -12 -10  -3   -0.60    6.70
  10 -12  -3    2.70    2.50
  10 -12  -3    2.90    6.20
  12  10   3    2.60    2.30
 -12 -10   3    8.30    7.00
  10 -12   3   10.00    7.60
  12   9  -3    2.10    2.40
 -12  -9  -3   12.20    7.30
   9 -12  -3    5.70    6.10
   9 -12  -3    4.40    2.40
   9 -12   3    3.90    1.70
   9 -12   3    5.90    6.60
 -12  -9   3   -5.00    6.30
  12   9   3    4.80    2.30
   8 -12  -3  100.19    6.80
  12   8  -3  102.59    7.00
 -12  -8  -3  104.19   15.70
   8 -12  -3  109.19   12.90
 -12  -8   3  100.89   13.40
  12   8   3  100.29    6.80
   8 -12   3   89.99   14.00
  12   7  -3   44.60    4.40
   7 -12  -3   44.80    9.20
  -7  12  -3   48.90    3.30
 -12  -7  -3   51.09   12.60
 -12  -7   3   53.49   12.40
  -7  12   3   44.00    4.30
  12   7   3   44.60    4.00
   7 -12   3   46.10   10.60
  12   6  -3   85.79    6.20
  -6  12  -3   90.49    4.90
   6 -12  -3   93.89   11.80
 -12  -6  -3   87.09   14.50
  12   6   3   86.99    5.40
 -12  -6   3   72.79   11.90
  -6  12   3   93.49    6.10
   6 -12   3  119.09   15.30
   5 -12  -3   45.10    7.90
  12   5  -3   56.89    4.90
  -5  12  -3   47.20    3.40
 -12  -5  -3   61.49   12.80
 -12  -5   3   57.19   10.00
   5 -12   3   59.49   10.90
  -5  12   3   41.80    4.10
  12   5   3   47.50    3.70
  -4  12  -3   -0.20    1.20
  12   4  -3    0.70    2.10
 -12  -4  -3    6.20    7.10
   4 -12  -3    1.60    4.10
   4 -12   3    1.60    5.70
 -12  -4   3    1.60    4.70
  12   4   3    2.10    1.50
  -4  12   3    0.80    1.70
 -12  -3  -3   -8.30    4.70
  12   3  -3    0.90    1.90
   3 -12  -3    4.10    4.10
  -3  12  -3    0.90    1.30
  12   3   3    1.50    1.30
  -3  12   3    2.40    1.90
   3 -12   3    0.20    4.60
 -12  -3   3    4.90    5.20
  -2  12  -3   68.59    4.20
  12   2  -3   62.09    5.00
 -12  -2  -3   71.49   13.30
   2 -12  -3   69.59    9.70
   2 -12   3   69.29   11.40
  -2  12   3   65.99    4.70
  12   2   3   60.79    3.80
 -12  -2   3   63.79   10.50
   1 -12  -3  100.69   12.40
  12   1  -3  100.49    6.50
  -1  12  -3  115.29    5.80
 -12  -1  -3  104.09    5.30
 -12  -1  -3  103.99   16.20
 -12  -1   3   88.49   12.90
  12   1   3  109.99    5.30
   1 -12   3  113.39   13.90
  -1  12   3  106.89    6.20
 -12   0  -3  112.79    5.40
   0 -12  -3  112.29   11.90
  12   0  -3  115.89    6.90
 -12   0  -3  105.69   16.20
   0  12  -3  126.59    6.20
  12   0   3  114.99    5.50
   0 -12   3  108.19   13.40
 -12   0   3  118.89   15.00
   0  12   3  115.59    6.50
 -12   1  -3   89.59   15.60
  -1 -12  -3  123.19   13.80
  12  -1  -3  106.09    6.40
   1  12  -3   98.49    5.70
  12  -1   3   98.09    4.80
  -1 -12   3  123.19   12.50
 -12   1   3   92.09   13.50
  12  -1   3  101.69    4.80
   1  12   3  106.59    6.10
   2  12  -3   64.19    4.40
  12  -2  -3   69.69    5.10
  -2 -12  -3   67.19   10.60
 -12   2  -3   77.19   14.70
  -2 -12   3   81.49   11.70
   2  12   3   73.49    4.80
  12  -2   3   61.89    3.10
 -12   2   3   66.59   12.40
  12  -2   3   60.79    3.10
 -12   3  -3   -6.00    6.70
  12  -3  -3    0.70    1.80
  -3 -12  -3   -5.20    4.30
   3  12  -3    0.50    1.60
 -12   3   3    0.50    6.70
  12  -3   3   -0.70    0.50
   3  12   3    0.90    1.60
  -3 -12   3    3.80    4.30
 -12   4  -3    2.10    7.90
  12  -4  -3    1.90    2.00
   4  12  -3    2.30    1.80
  -4 -12  -3    5.30    4.60
   4  12   3    3.00    1.90
  -4 -12   3    3.80    4.90
 -12   4   3    4.90    8.20
  -5 -12  -3   60.89   10.20
 -12   5  -3   32.30   13.20
  12  -5  -3   42.10    4.30
  -5 -12   3   38.10   10.30
   5  12   3   52.19    4.20
 -12   5   3   49.80   12.40
   6  12  -3   92.19    5.80
  12  -6  -3   77.39    5.90
 -12   6  -3  126.49   21.80
  -6 -12  -3   68.99   11.40
 -12   6   3   87.79   18.40
  -6 -12   3   65.99   11.40
   6  12   3   88.19    5.60
  12  -7  -3   54.89    5.00
   7  12  -3   50.79    4.60
  -7 -12  -3   44.70   10.30
 -12   7  -3   35.80   16.20
   7  12   3   42.80    4.10
  -7 -12   3   47.10    9.90
 -12   7   3   47.20   16.30
 -12   8  -3   58.69   18.20
  -8 -12  -3  113.39   15.10
  12  -8  -3   97.99   12.30
  12  -8  -3   70.99    7.60
   8  12  -3  110.39    6.60
  -8 -12   3   92.49   13.60
   8  12   3  103.09    6.30
 -12   9  -3   -6.30   11.70
  -9 -12  -3    4.20    6.10
  12  -9  -3    4.00    6.00
   9  12  -3    7.50    2.70
  12  -9  -3    5.80    2.70
   9  12   3    5.80    2.60
  -9 -12   3    3.90    6.40
  12 -10  -3    0.30    5.40
 -10 -12  -3    6.50    6.70
  10  12  -3    4.70    2.70
  12 -10  -3    2.50    2.50
  12 -10   3    3.60    7.30
 -10 -12   3    7.20    6.10
  10  12   3    1.10    2.40
 -11 -12  -3    8.80    9.10
  12 -11  -3    7.50    2.90
  12 -11  -3    6.90    6.30
  12 -11   3    0.80    8.20
 -11 -12   3   -0.20    6.60
  11  12   3    6.50    2.90
  10 -13  -3    1.90    2.50
 -13 -10  -3    2.60    9.40
  10 -13  -3   11.40    6.80
 -13 -10   3    0.60    7.00
  13  10   3   -3.00    2.20
  13   9  -3   14.30    3.30
 -13  -9  -3   18.50    8.70
   9 -13  -3   14.70    3.10
   9 -13  -3    8.60    6.50
   9 -13   3    9.70    1.90
   9 -13   3    7.70    6.30
 -13  -9   3   18.30    8.30
  13   9   3   13.30    2.90
   8 -13  -3   18.10    3.20
 -13  -8  -3   10.40    9.00
  -8  13  -3   23.10    2.40
  13   8  -3   10.20    3.10
   8 -13  -3    4.10    6.00
 -13  -8   3   25.60    9.50
  13   8   3   22.20    3.00
   8 -13   3   27.30    9.20
  -8  13   3   18.50    3.20
 -13  -7  -3  179.38   22.50
  13   7  -3  172.88    9.80
  -7  13  -3  168.78    8.50
   7 -13  -3  205.38   16.60
   7 -13   3  179.98   17.50
  13   7   3  176.78    9.10
  -7  13   3  174.38    9.60
  13   6  -3   43.90    4.60
  -6  13  -3   46.00    3.50
   6 -13  -3   44.40    8.30
 -13  -6  -3   44.70   12.80
  -6  13   3   42.40    4.20
  13   6   3   42.60    3.80
   6 -13   3   70.89   12.50
 -13  -6   3   47.10    9.60
   5 -13  -3   67.79   10.90
  -5  13  -3   79.69    4.40
 -13  -5  -3   75.39   13.90
  13   5  -3   61.99    5.50
 -13  -5   3   62.69   11.50
  -5  13   3   64.09    5.20
   5 -13   3   69.69   12.00
  13   5   3   68.59    4.60
   4 -13  -3    9.20    5.70
  -4  13  -3    2.90    1.60
  13   4  -3    4.80    2.50
 -13  -4  -3    3.20    7.30
  -4  13   3    1.40    1.90
   4 -13   3    6.10    6.80
 -13  -4   3   10.30    6.10
  13   4   3    2.00    1.60
  -3  13  -3   64.19    4.20
 -13  -3  -3   72.09   14.10
   3 -13  -3   70.29   10.60
  13   3  -3   61.29    5.70
  13   3   3   62.09    4.10
 -13  -3   3   60.49   11.10
  -3  13   3   69.59    5.00
   3 -13   3   60.79   11.00
  13   2  -3   13.60    2.90
   2 -13  -3   28.50    7.30
 -13  -2  -3   19.10    8.10
  -2  13  -3   21.90    2.50
  -2  13   3   21.30    3.10
 -13  -2   3   28.80    7.60
   2 -13   3   26.20    7.60
 -13  -1  -3  200.48    9.10
 -13  -1  -3  223.28   21.60
   1 -13  -3  188.68   16.50
  -1  13  -3  207.38    9.60
  13   1  -3  197.48   10.40
   1 -13   3  216.38   18.00
  13   1   3  201.48    9.10
  -1  13   3  189.18   10.00
 -13  -1   3  173.48   17.60
   0 -13  -3  100.69   13.20
 -13   0  -3   71.79    4.90
 -13   0  -3   55.19   13.70
   0  13  -3   66.99    4.60
  13   0  -3   65.49    5.40
   0 -13   3   79.19   11.60
 -13   0   3   76.19   13.10
   0  13   3   78.49    5.20
  13   0   3   75.09    3.90
   1  13  -3  217.58    9.70
 -13   1  -3  216.58   26.10
  -1 -13  -3  202.78   17.20
  13  -1  -3  184.48   10.20
   1  13   3  201.48   10.00
 -13   1   3  201.68   19.10
  13  -1   3  181.68    8.60
  -1 -13   3  209.38   17.50
  13  -1   3  194.38    8.60
  13  -2  -3   21.30    3.10
   2  13  -3   17.60    2.70
 -13   2  -3   28.40    9.80
  -2 -13  -3   23.80    7.10
 -13   2   3   13.70    8.00
   2  13   3   17.10    2.60
  -2 -13   3   25.30    7.90
  13  -2   3   17.60    1.50
  13  -2   3   17.60    1.40
  -3 -13  -3   68.29   11.10
  13  -3  -3   69.99    5.30
 -13   3  -3   52.29   14.10
   3  13   3   64.29    5.00
 -13   3   3   75.79   15.20
  -3 -13   3   69.09   11.50
  13  -4  -3    3.40    2.40
  -4 -13  -3    3.70    5.60
 -13   4  -3    5.70    8.40
   4  13  -3    4.00    2.10
 -13   4   3   11.70    9.20
  -4 -13   3    9.60    5.60
   4  13   3    4.20    2.20
 -13   5  -3   57.59   15.90
   5  13  -3   75.09    5.20
  13  -5  -3   60.59    5.40
  -5 -13  -3   63.99   11.00
 -13   5   3   41.30   13.20
   5  13   3   76.79    5.20
  -5 -13   3   46.50   10.10
   6  13  -3   44.00    4.40
 -13   6  -3   29.00   13.50
  -6 -13  -3   49.20   10.20
  13  -6  -3   45.70    4.60
  -6 -13   3   37.60    9.80
 -13   6   3   38.60   13.80
   6  13   3   39.70    4.10
 -13   7  -3   91.59   23.40
   7  13  -3  183.68    9.40
  -7 -13  -3  180.58   17.60
  13  -7  -3  167.18    9.40
 -13   7   3  150.38   23.90
   7  13   3  164.38    9.10
  -7 -13   3  171.68   16.50
 -13   8  -3   61.89   19.50
  13  -8  -3   25.80    3.80
  13  -8  -3   20.00    7.30
   8  13  -3   22.90    3.30
  -8 -13  -3   23.20    9.30
   8  13   3   24.30    3.60
  -8 -13   3   23.90    8.50
  13  -9  -3   10.90    3.10
  -9 -13  -3   16.90    8.20
 -13   9  -3   17.00   15.80
  13  -9  -3    3.60    6.40
   9  13  -3   11.00    3.00
   9  13   3    9.30    2.80
  -9 -13   3   18.30    8.60
  13 -10  -3   -2.00    2.50
  13 -10  -3   -7.60    6.30
  10  13  -3   -0.40    2.60
 -10 -13  -3   -8.20    9.60
  10  13   3    4.80    2.70
 -10 -13   3    6.90    6.20
   9 -14  -3    6.80    2.80
 -14  -9  -3   10.90    9.60
  14   9  -3    6.70    3.00
   9 -14  -3    1.00    6.40
 -14  -9   3   -7.20    8.70
  14   9   3    4.70    2.50
   9 -14   3    5.30    7.80
   8 -14  -3    5.30    2.60
  14   8  -3   -1.40    2.80
 -14  -8  -3   -4.90    7.60
  -8  14  -3    1.10    1.50
   8 -14  -3    2.40    6.50
  14   8   3    0.50    2.20
   8 -14   3   -3.20    5.40
  -8  14   3    4.80    2.60
 -14  -8   3    6.70    7.90
   7 -14  -3   17.20    7.00
  -7  14  -3   37.80    3.20
 -14  -7  -3   41.40   12.40
  14   7  -3   31.00    4.30
  14   7   3   37.00    3.80
  -7  14   3   28.60    3.80
   7 -14   3   38.00   10.10
 -14  -7   3   14.00    8.20
 -14  -6  -3  114.59   17.80
   6 -14  -3  131.19   15.70
  14   6  -3  146.19    8.60
  -6  14  -3  146.89    7.30
 -14  -6   3  119.19   16.90
  14   6   3  141.89    7.70
  -6  14   3  139.29    8.30
   6 -14   3  130.59   17.50
  -5  14  -3    7.30    1.90
   5 -14  -3    8.70    6.30
  14   5  -3    9.20    3.10
 -14  -5  -3   -4.00    7.10
   5 -14   3    4.80    6.40
 -14  -5   3    8.00    7.50
  -5  14   3    8.70    2.70
  14   5   3    7.40    2.10
 -14  -4  -3    2.10    6.20
  14   4  -3    3.90    2.40
  -4  14  -3    1.90    1.70
  14   4   3    6.10    1.90
 -14  -4   3   -6.70    7.10
   4 -14   3    0.60    6.00
  -4  14   3    0.50    2.00
  14   3  -3   16.20    3.30
   3 -14  -3   23.10    9.90
  -3  14  -3   17.20    2.40
 -14  -3  -3   23.20   10.30
  -3  14   3   18.20    3.00
  14   3   3   22.20    2.50
   3 -14   3    9.10    6.70
 -14  -3   3   21.20    8.20
 -14  -2  -3   10.20    8.40
  14   2  -3   -2.10    2.10
  -2  14  -3   -2.10    1.50
   2 -14  -3    0.50    4.90
  -2  14   3    1.10    2.00
 -14  -2   3    6.30    6.40
  14   2   3    0.60    1.40
   2 -14   3    0.70    5.80
   1 -14  -3   12.00    7.60
  -1  14  -3   20.00    2.60
 -14  -1  -3   20.00    9.20
  14   1  -3   19.90    3.10
 -14  -1   3   14.20    7.70
  -1  14   3   15.50    2.80
  14   1   3   17.40    2.00
   1 -14   3   14.70    7.10
 -14   0  -3  220.08   26.60
   0  14  -3  243.18   11.80
   0 -14   3  268.07   21.00
  14   0   3  261.07   11.00
   0  14   3  253.57   12.20
 -14   0   3  203.28   21.30
   1  14  -3   20.20    2.90
 -14   1  -3    6.70    8.20
  -1 -14  -3   16.60    6.70
  14  -1  -3   13.20    4.50
  14  -1   3   18.80    1.70
 -14   1   3   13.70    8.60
  -1 -14   3   21.70    7.90
   1  14   3   18.80    3.00
  14  -2  -3    0.40    2.50
   2  14  -3   -0.10    1.80
  -2 -14  -3    5.10    6.00
 -14   2  -3    0.70    8.60
  -2 -14   3   -3.10    4.80
   2  14   3    0.20    2.00
 -14   2   3   -4.80    7.70
  14  -2   3    0.00    0.80
   3  14  -3   13.10    2.70
 -14   3  -3   30.20   13.00
  -3 -14  -3   28.00    8.50
  -3 -14   3   13.00    6.90
 -14   3   3   24.30   10.50
   3  14   3   19.50    3.10
  14  -4  -3    4.80    2.90
   4  14  -3    0.40    2.20
 -14   4  -3   -6.50    7.80
  -4 -14  -3    3.10    6.00
 -14   4   3   -4.40   11.00
   4  14   3    1.20    2.20
  -4 -14   3   -1.10    5.20
  14  -5  -3    6.80    2.70
   5  14  -3    3.60    2.40
  -5 -14  -3   16.20    7.60
 -14   5  -3   36.90   14.50
 -14   5   3    6.70   10.70
  -5 -14   3   10.30    6.80
   5  14   3    3.10    2.30
 -14   6  -3  138.59   26.90
  -6 -14  -3  169.78   16.80
   6  14  -3  156.48    8.70
  14  -6  -3  145.99    8.90
 -14   6   3  143.19   24.60
  -6 -14   3  142.99   17.90
   6  14   3  153.18    8.70
  14  -7  -3   24.90    3.80
  -7 -14  -3   25.40    8.40
   7  14  -3   30.30    3.80
 -14   7  -3   34.40   16.80
 -14   7   3   27.20   17.90
   7  14   3   27.10    3.60
  -7 -14   3   51.69   10.90
   8  14  -3   -1.20    2.20
  -8 -14  -3   -9.80    6.10
 -14   8  -3  -27.80   12.90
  14  -8  -3    1.80    2.50
  14  -8  -3    8.80    6.60
  -8 -14   3   -0.90    6.70
   8  14   3    1.80    2.40
   9  14  -3    2.50    2.70
  -9 -14  -3    4.90    8.10
  14  -9  -3   12.00    7.50
 -14   9  -3  -10.40   14.50
  14  -9  -3    0.60    2.30
  -9 -14   3    5.50    8.10
   9  14   3    5.50    3.40
 -15  -7  -3    6.50    9.00
   7 -15  -3   -7.10    5.60
  -7  15  -3    1.00    1.80
  15   7  -3    0.40    2.90
 -15  -7   3   -5.30    7.80
   7 -15   3    7.20    7.50
  15   7   3    1.50    2.20
  -7  15   3    1.70    2.50
 -15  -6  -3   -6.20    8.30
  15   6  -3    2.70    2.70
   6 -15  -3    9.00    6.80
  -6  15  -3    2.50    2.00
   6 -15   3   -7.60    6.00
 -15  -6   3    8.00    8.90
  15   6   3    0.20    2.00
  -6  15   3    5.20    2.60
  15   5  -3   36.20    4.30
   5 -15  -3   43.50    9.60
 -15  -5  -3   37.20   11.90
  -5  15  -3   40.80    3.50
  15   5   3   36.60    3.50
 -15  -5   3   41.50   11.80
  -5  15   3   31.70    4.10
   5 -15   3   25.80    9.50
  15   4  -3   26.80    3.90
   4 -15  -3   14.60    7.50
  -4  15  -3   26.00    3.00
 -15  -4  -3   16.40   10.50
 -15  -4   3   21.40    9.20
   4 -15   3   26.80    8.20
  -4  15   3   20.60    3.40
  15   4   3   26.00    2.80
  -3  15  -3   39.10    4.30
  15   3  -3   45.30    4.90
 -15  -3  -3   27.50   10.90
   3 -15  -3   42.50    9.80
 -15  -3   3   33.90   10.00
  15   3   3   41.70    3.40
   3 -15   3   48.90   11.10
  -3  15   3   41.20    4.30
 -15  -2  -3   11.30    8.90
  -2  15  -3   25.30    2.90
  15   2  -3   24.40    3.90
   2 -15  -3   19.20    7.90
   2 -15   3   11.50    6.60
 -15  -2   3   19.10    9.50
  -2  15   3   21.90    3.30
  15   2   3   20.60    2.40
 -15  -1  -3   13.60   10.20
  15   1  -3   10.20    3.00
   1 -15  -3   19.70    7.10
  -1  15  -3    6.80    2.10
  15   1   3    6.80    1.70
 -15  -1   3   18.30    8.60
   1 -15   3   11.40    7.30
  -1  15   3   11.70    2.90
   0  15  -3    4.60    2.20
 -15   0  -3    4.90    9.00
   0 -15  -3    3.50    6.00
  15   0  -3    5.90    2.70
  15   0   3    2.30    1.30
 -15   0   3   14.80    9.00
   0  15   3    5.70    2.50
   0 -15   3    4.00    5.40
  15  -1  -3    6.90    2.80
  -1 -15  -3   -5.10    6.30
 -15   1  -3   14.20    9.70
   1  15  -3    9.50    2.60
  -1 -15   3    7.80    6.90
   1  15   3   10.00    2.60
  15  -1   3    9.90    1.40
 -15   2  -3   18.00   10.70
   2  15  -3   20.40    3.10
  15  -2  -3   20.90    3.50
  -2 -15  -3   23.50    8.30
   2  15   3   22.20    3.30
  -2 -15   3   21.90    8.40
 -15   3  -3   32.10   12.70
   3  15  -3   42.40    4.10
  -3 -15  -3   34.70    8.70
  15  -3  -3   29.70    4.00
   3  15   3   41.40    4.20
  -3 -15   3   44.10   10.10
 -15   3   3    9.20   17.50
 -15   4  -3   31.00   12.70
  -4 -15  -3   22.40    7.90
  15  -4  -3   26.00    3.70
   4  15  -3   19.10    3.20
 -15   4   3   20.00   12.80
   4  15   3   15.20    3.10
  -4 -15   3   26.20    9.40
  -5 -15  -3   26.50    8.60
   5  15  -3   39.40    4.10
 -15   5  -3   26.70   15.50
  15  -5  -3   29.50    4.00
  -5 -15   3   27.40    9.70
 -15   5   3   47.90   16.20
   5  15   3   34.60    4.30
 -15   6  -3    7.50   14.90
  -6 -15  -3   -3.10    6.30
   6  15  -3    1.00    2.50
  15  -6  -3    5.10    2.60
 -15   6   3  -16.00   12.50
  -6 -15   3    4.50    6.10
   6  15   3    2.50    2.70
  15  -7  -3    2.30    2.60
   7  15  -3    3.40    3.00
 -15   7  -3   -9.60   15.60
  -7 -15  -3    5.00    9.30
   7  15   3    0.10    2.50
  -7 -15   3   -2.50    6.80
 -15   7   3   -7.60   16.80
  -5  16  -3    6.70    2.10
 -16  -5  -3   28.30   12.60
  16   5  -3    9.10    3.10
   5 -16  -3   10.50    8.00
  16   5   3    8.70    2.40
   5 -16   3   11.40    8.70
  -5  16   3   10.40    3.10
 -16  -5   3   13.20   10.10
   4 -16  -3  105.99   14.20
  -4  16  -3   82.89    5.60
  16   4  -3   74.99    6.50
 -16  -4  -3   66.69   14.90
  -4  16   3  101.19    6.50
  16   4   3   80.69    5.30
 -16  -4   3   54.99   13.50
   4 -16   3   74.89   13.60
 -16  -3  -3   34.30   22.10
  16   3  -3   17.40    3.60
   3 -16  -3   27.50    8.00
  -3  16  -3   23.80    3.10
 -16  -3   3   26.70   11.20
  -3  16   3   21.30    3.60
  16   3   3   24.00    2.70
  16   2  -3   46.10    5.00
  -2  16  -3   55.09    4.50
   2 -16  -3   54.89   11.20
 -16  -2  -3   56.69   13.20
  -2  16   3   57.39    5.00
 -16  -2   3   47.80   13.10
  16   2   3   47.00    3.60
   2 -16   3   27.90    8.70
  -1  16  -3    7.10    2.30
 -16  -1  -3    0.00   10.80
  16   1  -3    2.30    2.70
   1 -16  -3    5.00    7.10
 -16  -1   3   -0.10    9.90
  -1  16   3    1.40    2.30
   1 -16   3    2.10    6.20
   0 -16  -3   18.40    7.30
  16   0  -3   22.30    3.80
   0  16  -3   23.70    3.20
 -16   0  -3   23.20   11.90
 -16   0   3   11.20   10.60
   0  16   3   22.40    3.40
   0 -16   3   11.30    7.80
 -16   1  -3   -4.90   10.60
   1  16  -3    4.30    2.20
  -1 -16  -3    6.00    7.40
  16  -1  -3    5.30    2.70
  -1 -16   3    1.80    7.20
 -16   1   3    2.30   11.50
   1  16   3    2.70    2.40
   2  16  -3   64.49    5.00
 -16   2  -3   47.10   16.60
  -2 -16  -3   74.19   12.60
  16  -2  -3   57.69    5.40
 -16   2   3   51.19   14.40
  -2 -16   3   36.90   10.90
   2  16   3   49.30    4.80
   3  16  -3   21.70    3.20
  -3 -16  -3    7.90    7.30
  16  -3  -3   30.90    4.10
 -16   3  -3    9.90   12.20
 -16   3   3   13.60   14.00
   3  16   3   41.60    7.00
  -3 -16   3   49.50   16.80
  16  -4  -3   75.59    6.20
  -4 -16  -3   84.99   14.50
 -16   4  -3   84.79   30.30
   4  16  -3   77.09    5.80
  -4 -16   3   73.29   13.10
   4  16   3   77.39    6.10
 -16   4   3   47.10   17.90
   5  16  -3   11.00    3.20
  16  -5  -3    3.20    2.70
 -16   5  -3   -0.90   15.90
  -5 -16   3   35.20   10.30
 -16   5   3   19.20   17.80
   5  16   3    5.90    3.00
   0   0  -4 4375.16  191.78
   0   0   4 4862.21  189.28
  -1   0  -4   19.30    3.90
   0  -1  -4   20.40    1.50
   1   0  -4   19.60    1.50
   1   0  -4   20.90    1.60
  -1   0  -4   19.70    1.30
  -1   0  -4   16.70    1.30
   0  -1  -4   19.90    1.40
   0  -1  -4   23.10    3.10
   0   1  -4   21.00    1.50
  -1   0   4   21.10    2.00
   0   1   4   19.20    1.90
   1   0   4   22.60    3.10
   0  -1   4   24.70    3.50
   0  -1   4   18.40    3.40
   0  -1   4   20.30    1.40
  -1   0   4   20.30    1.70
  -1   1  -4  165.68   13.40
   1  -1  -4  209.98    9.00
   1  -1  -4  206.08    9.00
   1   1  -4  203.08    9.00
  -1  -1  -4  204.88    8.80
  -1   1  -4  204.38    8.80
  -1  -1  -4  185.98   11.20
  -1   1  -4  210.58    8.80
   1   1   4  207.88    8.90
  -1  -1   4  215.08    9.00
   1  -1   4  209.58   12.00
  -1  -1   4  207.58   10.00
  -1   1   4  198.28    8.60
  -1   1   4  206.78    8.70
  -1  -1   4  221.08   13.40
   1   1   4  207.48   10.30
   1  -2  -4   36.50    2.20
   1  -2  -4   36.50    2.30
  -1   2  -4   33.10    1.90
  -2  -1  -4   37.20    1.90
   2   1  -4   38.80    2.30
  -2  -1  -4   33.30    4.70
   1  -2  -4   35.20    2.30
  -1   2  -4   27.50    6.00
  -1   2   4   35.80    2.30
  -2  -1   4   38.90    5.10
   1  -2   4   37.60    5.60
   1  -2   4   35.70    1.90
  -1   2   4   35.30    1.90
  -2  -1   4   32.40    2.10
   2   1   4   36.30    3.50
   2   1   4   36.40    2.00
  -2  -1   4   30.40    2.60
  -2   0  -4  154.38    6.50
   0  -2  -4  153.68    8.00
   0  -2  -4  156.78    6.80
   0   2  -4  146.89    6.70
  -2   0  -4  154.38    6.60
  -2   0  -4  144.49   10.30
   2   0  -4  152.78    7.00
   0  -2   4  193.68   12.30
   0  -2   4  149.69    6.80
   0  -2   4  160.88    8.90
  -2   0   4  142.99    6.80
   0   2   4  152.18    7.40
   2   0   4  144.09    9.00
  -2   0   4  161.58    7.50
   0   2   4  149.29    6.90
  -2   0   4  150.48    6.90
  -2   1  -4   31.30    6.00
   1   2  -4   38.50    2.20
   2  -1  -4   36.50    2.20
  -1  -2  -4   35.20    3.40
  -1  -2  -4   32.80    2.00
   2  -1  -4   38.30    2.40
  -2   1  -4   35.60    1.80
  -2   1  -4   34.30    1.80
   2  -1   4   35.30    5.00
  -1  -2   4   42.80    3.60
  -1  -2   4   37.80    6.40
   1   2   4   33.90    2.10
  -1  -2   4   34.70    2.10
   1   2   4   31.60    2.90
   2   2  -4  522.35   20.20
   2  -2  -4  481.65   20.20
   2  -2  -4  495.75   20.30
  -2   2  -4  475.55   19.80
  -2   2  -4  417.76   27.20
  -2  -2  -4  479.15   19.90
  -2  -2  -4  479.95   22.80
   2   2  -4  487.85   22.10
  -2   2  -4  458.85   19.70
  -2  -2   4  485.65   20.20
   2  -2   4  499.15   25.30
   2   2   4  478.05   21.90
  -2  -2   4  445.16   21.40
   2   2   4  476.25   19.90
   2  -3  -4   15.20    1.70
   2  -3  -4   11.20    2.10
  -3  -2  -4   12.20    1.10
   3   2  -4   14.60    2.50
   2  -3  -4   12.50    1.30
  -2   3  -4   12.00    1.00
  -2   3  -4    3.90    4.00
   2  -3  -4   14.70    1.50
   3   2  -4   11.50    1.40
  -3  -2  -4   13.00    3.10
  -3  -2   4   11.90    1.40
   2  -3   4   27.70    5.90
   3   2   4   15.10    3.00
  -2   3   4   12.30    1.50
   2  -3   4   12.30    1.00
  -3  -2   4   12.30    2.20
   3   2   4   10.60    1.10
  -3  -1  -4  241.68   10.10
  -1   3  -4  229.68   10.20
  -3  -1  -4  239.08   14.10
   1  -3  -4  229.88   10.40
   1  -3  -4  237.78   10.90
   3   1  -4  253.97   10.60
   1  -3   4  233.68   10.20
   1  -3   4  226.28   13.20
   3   1   4  246.68   10.10
  -1   3   4  243.58   10.90
  -3  -1   4  236.98   11.30
  -1   3   4  235.18   10.50
   3   1   4  245.98   13.00
  -3  -1   4  249.78   10.60
   1  -3   4  254.17   17.00
   3   0  -4   36.70    2.50
   0  -3  -4   36.80    2.20
  -3   0  -4   37.80    1.80
   3   0  -4   37.40    2.50
  -3   0  -4   36.60    1.90
   0  -3  -4   34.40    3.10
  -3   0  -4   37.90    5.70
   0   3  -4   33.60    2.10
   3   0   4   44.50    5.30
   0  -3   4   40.50    4.80
   0  -3   4   35.90    7.10
  -3   0   4   34.90    2.30
   0   3   4   35.60    2.90
   0   3   4   33.20    2.20
   0  -3   4   35.10    2.10
  -3   0   4   38.40    2.40
   3  -1  -4  256.37   10.80
   3  -1  -4  237.78   10.70
  -3   1  -4  194.18   15.20
  -3   1  -4  240.98   10.00
   1   3  -4  244.48   10.50
  -1  -3  -4  237.78   10.40
  -1  -3  -4  247.98   12.40
  -3   1  -4  240.08   10.10
  -1  -3   4  233.08   10.50
  -1  -3   4  255.57   18.00
   1   3   4  247.68   12.00
   3  -1   4  258.47   14.40
   1   3   4  247.48   10.50
  -1  -3   4  241.08   12.70
  -3   2  -4    8.20    4.00
  -3   2  -4   11.80    0.80
   3  -2  -4   15.90    1.80
  -3   2  -4   13.30    0.80
  -2  -3  -4   14.30    2.90
   3  -2  -4   12.00    1.30
  -2  -3  -4   14.60    1.20
   2   3  -4   12.90    1.40
   2   3  -4   13.90    2.90
  -2  -3   4   10.20    2.30
  -2  -3   4    9.90    1.30
   2   3   4   13.40    2.60
   2   3   4   10.50    1.20
   3  -2   4   14.60    4.10
   3  -3  -4 2361.06   98.19
   3  -3  -4 2306.77   97.99
  -3   3  -4 2434.16   97.49
   3   3  -4 2561.94   98.29
   3  -3  -4 2410.06   98.29
   3  -3  -4 2391.86   98.39
  -3  -3  -4 2429.46   97.89
   3   3  -4 2283.97  100.69
  -3   3  -4 2220.88  109.09
  -3  -3  -4 2444.16  101.89
   3  -3   4 2672.83  106.39
   3   3   4 2381.36  100.69
   3  -3   4 2266.67   97.49
  -3  -3   4 2521.05  100.59
   3   3   4 2374.66   97.89
  -3  -3   4 2415.36   98.19
  -4  -3  -4  139.19    9.80
  -3   4  -4  135.79   18.20
   4   3  -4  125.19    6.20
   4   3  -4  115.99    8.10
   3  -4  -4  123.49    6.00
   3  -4  -4  128.39    6.70
  -4  -3  -4  126.79    5.70
   3  -4  -4  127.69    8.40
  -3   4  -4  129.19    5.40
   3  -4   4  153.08   13.00
  -4  -3   4  115.79    6.10
   4   3   4  132.69    5.80
   3  -4   4  130.79    5.50
  -3   4   4  134.19    6.30
   4   3   4  112.29    8.20
  -4  -3   4  127.79    8.10
   2  -4  -4  185.58    9.20
   4   2  -4  194.78   10.30
   4   2  -4  164.38    8.50
  -2   4  -4  178.08    7.90
  -4  -2  -4  188.98   12.30
   2  -4  -4  183.78    8.40
   2  -4  -4  192.28   12.30
  -4  -2  -4  193.18    8.00
   4   2   4  191.38    8.10
   2  -4   4  177.18   11.90
  -4  -2   4  192.48   10.10
   2  -4   4  200.68    8.10
  -4  -2   4  194.68    8.60
  -2   4   4  178.78    8.50
   2  -4   4  166.58   15.40
   4   2   4  195.98   11.30
   4   1  -4    6.60    1.20
  -4  -1  -4    2.80    2.30
   1  -4  -4    4.40    0.90
   4   1  -4    4.70    1.40
  -1   4  -4    6.00    0.80
   1  -4  -4    4.20    1.40
  -4  -1  -4    5.70    0.70
  -4  -1   4    5.80    1.80
  -4  -1   4    3.50    1.00
   1  -4   4    7.00    0.90
   1  -4   4    4.30    4.20
   1  -4   4    2.50    1.90
  -1   4   4    5.10    1.20
  -1   4   4    5.90    1.40
   4   1   4    5.10    0.70
   4   1   4    5.40    2.30
  -4   0  -4  252.57   10.50
   0  -4  -4  240.28   11.00
  -4   0  -4  217.98   15.50
   4   0  -4  272.47   11.40
   0   4  -4  255.47   10.90
   4   0  -4  263.37   11.80
   0  -4  -4  263.77   12.70
   4   0   4  248.58   10.50
   4   0   4  257.97   14.60
   0  -4   4  269.97   19.70
   0  -4   4  267.47   14.30
   0  -4   4  250.87   10.90
  -4   0   4  251.27   11.80
   0   4   4  266.67   12.50
  -4   0   4  241.98   11.10
   0   4   4  241.18   11.00
  -1  -4  -4    4.40    0.90
   1   4  -4    5.00    1.00
   4  -1  -4    5.90    1.10
   4  -1  -4    1.60    0.80
  -1  -4  -4    4.80    1.80
  -4   1  -4    5.20    0.40
  -4   1  -4    1.70    2.90
   4  -1  -4    5.10    1.20
  -4   1  -4    5.00    0.40
   1   4  -4    7.80    2.40
  -1  -4   4    4.20    2.30
  -1  -4   4    3.80    5.00
  -4   1   4    4.00    0.90
  -1  -4   4    6.00    1.00
   4  -1   4    7.20    2.90
   1   4   4    7.90    2.00
   1   4   4    6.30    1.10
  -4   1   4    5.00    1.50
  -2  -4  -4  200.18   11.20
  -4   2  -4  201.48   15.60
   4  -2  -4  185.48    8.70
   4  -2  -4  189.98    8.70
   2   4  -4  171.78   11.20
   4  -2  -4  198.08    8.50
  -2  -4  -4  187.18    8.30
   2   4  -4  183.28    8.50
   4  -2  -4  184.58    8.80
  -2  -4   4  197.68    8.60
   2   4   4  195.38    8.40
  -2  -4   4  182.88   10.90
   2   4   4  185.98   10.60
  -3  -4  -4  135.59    6.00
   3   4  -4  120.79    8.70
   4  -3  -4  124.99    6.60
   4  -3  -4  133.79    6.70
  -3  -4  -4  146.79    9.60
   4  -3  -4  123.19    6.20
   4  -3  -4  129.19    6.40
  -4   3  -4  127.39   16.50
   3   4  -4  143.69    6.40
   4  -3   4  136.99   12.00
   3   4   4  134.89    8.60
  -3  -4   4  124.69    8.50
   3   4   4  128.19    6.00
  -3  -4   4  116.19    6.10
  -4   4  -4  244.98    9.70
   4  -4  -4  240.08   12.30
   4  -4  -4  239.58   11.60
   4  -4  -4  249.18   10.90
   4   4  -4  228.48   10.70
   4   4  -4  228.18   13.40
  -4   4  -4  220.58   20.70
  -4  -4  -4  254.17   14.80
  -4  -4  -4  245.28   10.30
  -4  -4   4  221.28   10.60
  -4  -4   4  216.08   13.10
   4  -4   4  229.28    9.70
   4  -4   4  249.38   17.90
   4   4   4  239.18   10.30
   4   4   4  233.58   13.40
   5   4  -4   19.00    2.10
  -4   5  -4   16.80    1.00
   4  -5  -4   16.80    2.80
   4  -5  -4   13.60    3.60
   5   4  -4   16.50    3.30
  -4   5  -4    6.70    7.70
  -5  -4  -4   14.30    4.30
   4  -5  -4   16.00    2.00
   4  -5   4   16.40    1.10
  -4   5   4   17.20    2.10
  -5  -4   4   15.90    3.70
   5   4   4   20.80    1.70
   5   4   4   19.10    3.90
   3  -5  -4   63.89    4.70
  -3   5  -4   62.79    3.00
   3  -5  -4   66.79    8.10
   5   3  -4   64.69    5.60
   5   3  -4   64.39    3.80
  -5  -3  -4   68.19    3.30
  -5  -3  -4   80.89    9.00
   5   3   4   63.29    6.20
  -5  -3   4   76.49    6.00
   5   3   4   61.39    3.30
   3  -5   4   52.29    7.20
   3  -5   4   65.59   11.10
   3  -5   4   68.69    3.20
  -3   5   4   61.29    3.80
   5   2  -4  126.19    8.00
   2  -5  -4  135.59    6.50
  -2   5  -4  125.49    5.70
   2  -5  -4  131.39    7.60
   5   2  -4  133.09    6.50
  -5  -2  -4  117.69   10.00
   2  -5  -4  108.99   10.70
  -5  -2  -4  127.79    5.70
   2  -5   4  133.19    5.80
  -5  -2   4  118.29    7.90
  -5  -2   4  121.59    6.40
   5   2   4  131.79    5.70
   2  -5   4  154.08   10.60
  -2   5   4  125.89    6.30
   5   2   4  135.99    9.30
   2  -5   4  136.29   14.20
  -5  -1  -4  296.07   18.10
   5   1  -4  311.07   13.30
  -1   5  -4  296.77   12.70
  -5  -1  -4  313.97   12.50
   1  -5  -4  288.67   14.70
   5   1  -4  278.77   14.40
   1  -5  -4  297.87   12.90
  -5  -1   4  285.17   13.10
   1  -5   4  307.57   22.70
  -5  -1   4  317.87   14.80
   5   1   4  299.57   12.50
   5   1   4  302.67   16.60
   1  -5   4  320.67   17.30
  -1   5   4  293.87   13.10
  -1   5   4  303.07   14.70
   1  -5   4  285.87   12.70
  -5   0  -4   86.49    9.40
   0  -5  -4   96.59    6.70
   0  -5  -4   98.49    4.80
   0   5  -4   99.39    4.80
   5   0  -4   96.09    6.00
   5   0  -4   94.29    5.20
  -5   0  -4  100.19    4.30
   5   0   4  104.89    8.30
   0  -5   4   98.29    8.00
  -5   0   4   97.19    7.70
   0   5   4  100.19    6.50
   0  -5   4   98.69    4.80
   0  -5   4   83.79   19.20
   0   5   4  107.89    5.00
   5   0   4  103.59    4.30
  -5   0   4   98.59    5.00
  -5   1  -4  296.57   19.90
   5  -1  -4  299.47   13.50
  -1  -5  -4  301.57   13.10
   5  -1  -4  296.37   13.40
   1   5  -4  308.07   13.10
   1   5  -4  303.17   18.60
  -1  -5  -4  319.67   15.80
   5  -1   4  295.97   17.80
  -1  -5   4  287.67   22.80
  -5   1   4  299.47   15.10
  -5   1   4  289.07   13.20
   1   5   4  304.27   15.40
  -1  -5   4  330.97   16.90
  -1  -5   4  313.77   13.20
   1   5   4  310.97   13.20
   2   5  -4  120.89   10.50
  -5   2  -4  116.19   12.40
  -2  -5  -4  127.79    6.00
   5  -2  -4  139.99    6.60
   5  -2  -4  133.19    7.00
  -2  -5  -4  121.19    8.70
   5  -2  -4  135.39    6.80
   2   5  -4  129.69    6.20
  -5   2   4  131.69    9.10
   2   5   4  128.39    8.40
   5  -2   4  142.19   11.30
  -2  -5   4  128.59    6.20
  -2  -5   4  141.19    9.30
   2   5   4  120.69    6.10
  -3  -5  -4   64.59    3.50
   5  -3  -4   63.69    4.60
   3   5  -4   67.39    6.70
   5  -3  -4   62.09    4.00
  -5   3  -4   63.19   11.40
   5  -3  -4   64.79    4.50
   3   5  -4   69.79    3.90
  -3  -5  -4   65.39    6.60
   3   5   4   65.99    3.60
  -3  -5   4   64.79    3.70
   5  -3   4   80.49   10.60
  -3  -5   4   72.39    6.40
  -4  -5  -4   30.10    5.60
   5  -4  -4   15.20    2.70
   5  -4  -4   16.90    2.80
  -4  -5  -4   16.40    1.60
   4   5  -4   20.70    2.10
   4   5  -4   18.90    4.10
  -5   4  -4   22.20    8.80
   5  -4  -4   15.60    2.00
   4   5   4   32.40    4.90
  -4  -5   4   16.20    3.80
   4   5   4   15.90    1.60
  -5   5  -4  182.38   23.80
   5  -5  -4  244.08   10.60
   5   5  -4  206.68   13.50
   5   5  -4  225.98   10.30
  -5  -5  -4  230.08   15.00
  -5  -5  -4  216.38    9.90
   5  -5  -4  211.78   12.00
   5  -5  -4  237.18   13.40
   5   5   4  231.28    9.90
  -5  -5   4  208.08   13.40
   5  -6  -4   40.70    5.20
  -6  -5  -4   39.40    7.20
   6   5  -4   42.80    3.30
  -6  -5  -4   39.00    2.60
   6   5  -4   40.70    7.40
   5  -6  -4   41.30    3.40
  -5   6  -4   29.10    9.90
  -5   6  -4   39.40    1.90
   5  -6  -4   39.60    6.20
  -5   6   4   36.00    3.20
   6   5   4   36.10    2.60
  -6  -5   4   43.40    6.30
   5  -6   4   41.10    2.00
  -4   6  -4   82.99    3.60
   4  -6  -4   74.69    9.10
  -6  -4  -4   82.39   10.00
   6   4  -4   75.99    4.70
   4  -6  -4   76.39    6.10
   6   4  -4   80.39    7.20
  -6  -4  -4   80.49    4.10
   6   4   4   83.99    4.10
   4  -6   4   75.59    9.70
  -6  -4   4   82.89    7.20
   4  -6   4   77.79    3.80
  -4   6   4   83.79    4.70
   3  -6  -4    5.40    1.80
   6   3  -4    4.10    1.40
   3  -6  -4    1.40    3.60
  -6  -3  -4    6.70    3.60
  -3   6  -4    5.70    0.80
   6   3  -4    7.20    2.50
  -6  -3  -4    7.60    1.00
  -3   6   4    3.90    1.40
   3  -6   4    4.20    0.80
   3  -6   4    8.80    3.80
  -6  -3   4    5.60    2.60
   6   3   4    6.20    1.00
   6   2  -4  122.49    6.10
  -6  -2  -4  128.69   11.00
  -6  -2  -4  114.99    5.20
   2  -6  -4   99.19    7.30
   2  -6  -4   76.99   11.20
   6   2  -4  120.79    7.90
  -2   6  -4  115.79    5.20
   2  -6   4  121.19   10.10
  -2   6   4  131.09    5.90
   2  -6   4  103.29    5.30
   6   2   4  116.39    5.20
  -6  -2   4  126.19    8.20
  -6  -1  -4   22.10    1.40
  -1   6  -4   20.70    1.70
   1  -6  -4   21.10    3.70
   6   1  -4   22.80    3.50
   6   1  -4   19.50    2.20
  -6  -1  -4   22.50    5.60
   1  -6   4   24.90    1.80
  -1   6   4   18.70    1.90
  -6  -1   4   22.20    3.60
   6   1   4   17.70    4.50
  -1   6   4   19.50    3.30
   6   1   4   23.50    1.40
   1  -6   4   33.60    9.60
   1  -6   4   22.10    4.80
   6   0  -4 1341.57   55.49
   0   6  -4 1360.46   54.99
  -6   0  -4 1259.87   62.59
  -6   0  -4 1347.27   54.49
   6   0  -4 1347.47   57.09
   0  -6  -4 1363.56   58.19
   0   6   4 1314.97   57.79
   6   0   4 1309.17   54.49
   0  -6   4 1355.36   55.09
   0  -6   4 1413.06   60.19
   6   0   4 1391.86   62.79
  -6   0   4 1304.97   57.69
   0  -6   4 1285.17   68.59
   0   6   4 1357.86   55.29
  -1  -6  -4   24.20    4.30
   6  -1  -4   22.30    2.40
   1   6  -4   20.30    4.30
   1   6  -4   23.10    2.00
   6  -1  -4   22.20    3.00
  -6   1  -4   22.70    6.60
  -6   1   4   18.60    3.50
   1   6   4   24.20    2.10
  -1  -6   4   22.60    4.40
  -1  -6   4   24.60    2.00
   1   6   4   16.80    3.30
   2   6  -4  105.19    5.50
  -2  -6  -4  110.99    8.50
   2   6  -4  100.49    9.10
   6  -2  -4  116.19    6.80
   6  -2  -4  105.49    5.80
  -6   2  -4  122.39   14.90
   2   6   4  120.09    5.60
   2   6   4  132.39    9.40
  -6   2   4  119.69    9.00
  -2  -6   4   97.09    8.50
  -2  -6   4  111.69    5.60
  -6   3  -4    5.70    5.10
   3   6  -4    5.80    3.50
   3   6  -4    8.90    1.60
  -3  -6  -4    4.90    2.60
   6  -3  -4    5.40    1.70
  -3  -6   4    4.40    2.80
   3   6   4    8.90    3.10
   3   6   4    5.30    1.20
  -6   3   4    9.60    4.20
   6  -4  -4   82.49    6.20
   4   6  -4   83.19    4.70
  -6   4  -4   86.59   15.00
  -4  -6  -4   84.19    8.10
   6  -4  -4   75.09    6.20
   6  -4  -4   81.99    4.90
   4   6   4   80.99    4.30
  -4  -6   4   76.39    7.70
   6  -5  -4   41.00    5.10
  -6   5  -4   38.50   10.90
   6  -5  -4   45.70    5.70
   6  -5  -4   32.30    3.20
   5   6  -4   42.80    3.20
  -5  -6   4   39.70    6.10
   5   6   4   42.00    2.80
  -6   6  -4  511.05   42.20
   6  -6  -4  627.84   30.80
   6  -6  -4  715.73   28.30
   6   6  -4  673.73   28.10
  -6  -6  -4  666.33   34.30
   6  -6  -4  622.04   32.10
   6   6   4  671.03   27.90
   6  -7  -4  159.18    8.10
  -7  -6  -4  153.88   13.10
  -6   7  -4  161.28   25.30
  -6   7  -4  148.09    6.50
   6  -7  -4  155.58   10.90
   7   6  -4  155.58    7.90
   7   6   4  150.08    7.30
  -7  -6   4  144.89   11.70
   6  -7   4  152.78   13.70
   5  -7  -4   38.70    7.20
  -7  -5  -4   26.40    6.30
   5  -7  -4   38.90    5.50
   7   5  -4   33.10    3.10
  -5   7  -4   37.80    2.00
   7   5   4   35.80    2.60
  -5   7   4   34.90    3.20
   5  -7   4   36.00    7.50
   5  -7   4   34.20    2.10
  -7  -5   4   51.59    7.10
   7   4  -4   32.00    2.90
  -7  -4  -4   26.40    6.30
  -7  -4  -4   26.10    2.10
   4  -7  -4   24.50    4.20
   7   4  -4   19.80    4.40
  -4   7  -4   26.30    1.70
   4  -7  -4   39.60    8.30
   4  -7   4   28.70    6.40
  -4   7   4   27.50    2.70
  -7  -4   4   30.50    5.10
   4  -7   4   26.20    1.90
   7   4   4   31.00    2.20
  -7  -3  -4   85.59   10.40
   7   3  -4   63.89    6.50
   3  -7  -4   59.99   10.40
   7   3  -4   58.59    4.20
  -3   7  -4   67.89    3.40
  -7  -3  -4   69.49    3.60
   3  -7  -4   75.99    6.40
  -7  -3   4   61.29    7.10
   3  -7   4   72.39    3.60
   7   3   4   75.59    3.60
  -3   7   4   72.49    4.30
   3  -7   4   89.29   10.30
  -7  -2  -4   -0.50    3.00
   2  -7  -4    4.00    5.40
  -2   7  -4    3.70    0.80
   7   2  -4    2.50    1.40
   7   2  -4    3.90    2.50
  -7  -2  -4    4.40    0.80
   2  -7  -4    4.40    2.40
  -2   7   4    0.30    1.20
   2  -7   4   -0.20    2.50
   7   2   4    2.50    0.80
  -2   7   4    4.60    2.50
  -7  -2   4    1.80    2.30
   2  -7   4    3.60    0.90
  -1   7  -4  209.98    9.20
   1  -7  -4  210.28   12.40
  -7  -1  -4  220.78   22.30
   7   1  -4  185.28    9.70
  -7  -1  -4  214.78    8.90
   7   1  -4  200.88   11.90
   7   1   4  211.38    8.80
  -7  -1   4  204.28   12.40
  -1   7   4  209.98    9.60
   1  -7   4  230.38   16.60
   1  -7   4  209.58    9.30
  -1   7   4  200.48   12.20
   7   0  -4  215.48   11.80
   0  -7  -4  213.08   12.80
  -7   0  -4  215.58    8.80
   0   7  -4  191.18    9.30
  -7   0  -4  189.98   18.40
   7   0  -4  219.98   10.10
   7   0   4  216.38    8.80
   0  -7   4  220.18   14.20
  -7   0   4  235.78   12.90
   0   7   4  200.38   12.30
   0   7   4  207.78    9.70
   0  -7   4  206.58    9.50
   1   7  -4  198.08    9.40
  -1  -7  -4  229.08   13.20
  -7   1  -4  200.18   16.80
   7  -1  -4  210.28    9.90
   7  -1  -4  193.48   11.20
   1   7   4  222.58    9.60
  -1  -7   4  205.78    9.50
  -7   1   4  198.98   12.80
  -1  -7   4  212.98   13.80
   1   7   4  212.38   12.60
  -2  -7  -4   -0.60    2.20
   7  -2  -4    0.90    1.30
  -7   2  -4    1.70    3.80
   7  -2  -4    4.30    2.00
   2   7  -4    2.70    1.30
   2   7   4    5.00    2.70
   2   7   4    2.60    1.20
  -7   2   4    0.60    2.60
  -2  -7   4    2.50    2.70
  -7   3  -4   65.49   12.10
   7  -3  -4   79.69    4.80
   3   7  -4   70.79    4.30
   7  -3  -4   82.19    6.10
  -3  -7  -4   69.99    7.50
  -3  -7   4   64.29    7.90
  -7   3   4   79.69   10.00
   3   7   4   72.29    4.10
   7  -4  -4   27.40    4.40
  -7   4  -4   29.80    9.70
  -4  -7  -4   29.80    7.30
   4   7  -4   26.00    2.50
   7  -4  -4   26.20    2.90
  -7   4   4   26.80    7.30
   4   7   4   28.20    2.50
  -4  -7   4   23.10    5.20
   5   7  -4   42.00    3.30
   7  -5  -4   41.90    3.70
   7  -5  -4   37.40    5.40
  -5  -7  -4   35.50    6.70
  -7   5  -4   32.70   12.00
   7  -5  -4   39.30    5.40
  -5  -7   4   34.70    6.40
   5   7   4   36.20    2.90
   6   7  -4  157.08    7.80
  -6  -7  -4  144.69   12.90
   7  -6  -4  139.29   10.50
   7  -6  -4  159.28   11.50
  -7   6  -4  135.39   21.90
   7  -6  -4  155.58    8.00
   6   7   4  149.19    7.30
  -6  -7   4  148.39   11.80
   7  -7  -4  164.98   11.40
  -7   7  -4  122.59   21.10
   7   7  -4  147.29    7.80
   7  -7  -4  119.19   11.80
  -7  -7  -4  147.19   13.50
   7  -7  -4  160.58    8.10
  -7  -7   4  141.79   12.00
   7   7   4  147.69    7.30
   8   7  -4    1.30    1.80
   7  -8  -4   -1.00    3.00
   7  -8  -4    5.90    2.10
  -8  -7  -4    2.90    4.10
   7  -8   4    2.70    0.80
   8   7   4    2.30    1.50
  -8  -7   4    3.00    4.20
   7  -8   4   15.10    6.70
   6  -8  -4    3.30    5.30
   6  -8  -4   -2.30    2.00
   6  -8  -4    1.40    1.80
  -6   8  -4    0.80    0.60
   8   6  -4    0.70    1.60
  -8  -6  -4    1.30    3.60
  -6   8   4   -1.20    1.50
   6  -8   4    0.70    0.70
   6  -8   4    5.70    4.20
   8   6   4    0.70    1.20
  -8  -6   4   -2.70    3.20
  -8  -5  -4   92.29   12.50
   5  -8  -4   88.79    7.90
   8   5  -4   81.09    5.20
  -5   8  -4   84.29    4.00
   5  -8  -4   96.49   12.60
   8   5   4   85.59    4.50
   5  -8   4   92.99   11.50
  -8  -5   4   78.89    9.30
  -5   8   4   79.99    5.20
   5  -8   4   87.29    4.20
  -4   8  -4   44.60    2.50
  -8  -4  -4   40.50    2.70
   4  -8  -4   45.60   10.00
  -8  -4  -4   48.80    8.60
   4  -8  -4   42.60    6.00
   8   4  -4   50.69    3.90
   4  -8   4   41.00    2.60
  -4   8   4   32.60    3.20
  -8  -4   4   47.70    6.90
   4  -8   4   57.29    8.80
   8   4   4   41.30    2.70
   8   3  -4   84.19    8.20
   3  -8  -4   98.49   14.70
  -8  -3  -4   87.19   11.50
  -8  -3  -4   90.29    4.60
   8   3  -4   89.59    5.50
  -3   8  -4   92.59    4.50
   3  -8  -4   86.19    7.60
   8   3   4  103.19    4.60
   3  -8   4   99.59   10.10
  -3   8   4  100.09    5.40
   3  -8   4   96.39    4.70
  -8  -3   4   88.29    8.20
   8   2  -4  141.39    9.60
  -8  -2  -4  119.09   12.30
   2  -8  -4  124.49    9.50
  -2   8  -4  132.79    6.00
   2  -8  -4  107.59   15.70
   8   2  -4  135.39    6.90
  -8  -2  -4  129.69    5.90
  -2   8   4  133.09    9.50
  -2   8   4  131.29    6.60
   8   2   4  129.69    5.90
   2  -8   4  119.29    6.20
   2  -8   4  146.19   11.90
  -8  -2   4  122.49    9.80
   8   1  -4   68.49    6.90
  -1   8  -4   65.69    3.60
  -8  -1  -4   56.39    9.90
  -8  -1  -4   64.19    3.20
   1  -8  -4   65.69    6.80
   8   1  -4   68.59    4.50
   1  -8   4   66.69    3.80
  -1   8   4   64.99    4.10
   8   1   4   67.69    3.20
  -8  -1   4   64.79    6.70
  -1   8   4   78.69    7.10
   1  -8   4   74.89    9.40
   0  -8  -4   14.60    3.90
   8   0  -4   16.80    3.60
   0   8  -4   16.10    1.80
  -8   0  -4   19.20    6.40
   8   0  -4   20.20    2.50
   0  -8   4   21.90    2.30
  -8   0   4   15.60    3.90
   8   0   4   22.20    1.20
   0   8   4   17.70    3.90
   0   8   4   18.10    2.10
   0  -8   4   28.30    6.10
  -1  -8  -4   70.49    7.20
  -8   1  -4   65.29   11.60
   8  -1  -4   61.09    5.60
   8  -1  -4   60.29    4.30
   1   8  -4   69.69    3.80
  -8   1   4   63.59    8.00
  -1  -8   4   71.39    8.80
   1   8   4   60.59    7.30
   1   8   4   61.89    3.90
   8  -2  -4  113.39    8.40
  -8   2  -4  126.69   16.70
  -2  -8  -4  136.39   10.60
   8  -2  -4  131.79    7.10
   2   8  -4  126.39    6.50
  -8   2   4  138.29   11.50
   2   8   4  140.29    6.60
  -2  -8   4  141.59   11.20
   8  -3  -4   95.59    7.40
  -8   3  -4   70.09   13.10
  -3  -8  -4   92.79   11.60
   8  -3  -4   98.29    5.80
   3   8  -4   94.69    5.30
   3   8   4  103.49    5.30
  -8   3   4  110.69   11.30
  -3  -8   4   87.19    9.10
  -4  -8  -4   43.90    7.30
   8  -4  -4   42.90    5.70
   4   8  -4   52.59    3.50
   8  -4  -4   48.10    3.90
  -8   4  -4   29.50    9.80
   4   8   4   42.00    3.20
  -8   4   4   33.40    7.20
  -4  -8   4   37.20    6.20
   8  -5  -4   91.79    5.70
  -5  -8  -4   98.89   11.20
   8  -5  -4   71.59    8.80
  -8   5  -4   76.39   16.00
   5   8  -4   87.99    5.20
  -5  -8   4   88.69   10.50
   5   8   4   81.89    4.90
  -8   5   4  101.89   15.10
   8  -6  -4    1.90    2.90
  -6  -8  -4    6.20    5.00
   6   8  -4    3.00    1.70
   8  -6  -4    5.10    3.30
  -8   6  -4    3.10    6.80
   8  -6  -4   -0.40    1.70
   6   8   4   -1.50    1.20
  -6  -8   4    2.10    4.00
  -8   7  -4    5.30    8.90
   8  -7  -4    1.00    1.90
   7   8  -4    4.70    2.00
  -7  -8  -4   -2.40    3.70
   8  -7  -4    8.10    3.80
   8  -7  -4    6.30    4.50
   7   8   4    2.50    1.60
  -7  -8   4    8.60    4.70
   8   8  -4   57.99    4.70
   8  -8  -4   62.69    8.40
  -8  -8  -4   68.49   11.10
   8  -8  -4   56.39    4.80
  -8   8  -4   57.49   16.40
  -8  -8   4   52.29    9.20
   8  -8   4   77.89   11.80
   8   8   4   65.09    4.20
  -9  -8  -4   11.60    6.00
   8  -9  -4   13.70    4.60
   9   8  -4   14.40    2.70
   8  -9  -4   13.90    2.90
   8  -9   4   15.10    1.30
   8  -9   4   10.80    5.80
  -9  -8   4    8.70    5.50
   9   8   4   12.80    2.20
   7  -9  -4    5.90    3.70
  -9  -7  -4   12.20    4.80
   9   7  -4   14.60    2.50
   7  -9  -4    9.30    2.70
  -7   9  -4   14.10    1.30
  -9  -7   4   12.20    5.40
   7  -9   4   11.10    1.30
   7  -9   4   13.00    6.50
   9   7   4   14.20    2.10
  -9  -6  -4    2.50    4.40
  -6   9  -4    1.80    0.90
   9   6  -4    2.50    2.00
   6  -9  -4    3.30    3.70
   6  -9   4    1.10    0.90
  -6   9   4    2.90    1.70
   6  -9   4   -1.50    4.50
  -9  -6   4    2.90    4.10
   9   6   4    2.90    1.40
   9   5  -4    8.50    2.20
   5  -9  -4    8.40    3.80
  -9  -5  -4    5.80    4.40
  -5   9  -4    7.10    1.20
   5  -9   4    6.00    4.90
   9   5   4    6.70    1.50
  -9  -5   4    9.20    4.20
  -5   9   4    6.60    1.90
   5  -9   4    6.10    1.20
   9   4  -4   56.89    4.50
  -9  -4  -4   68.19   11.10
   4  -9  -4   69.79    8.10
  -4   9  -4   65.89    3.50
  -9  -4   4   72.99    8.90
  -4   9   4   70.09    4.50
   4  -9   4   87.99   11.50
   9   4   4   63.09    3.70
  -9  -3  -4  409.06   26.20
  -3   9  -4  404.46   16.90
   9   3  -4  409.56   18.00
  -9  -3  -4  410.06   17.10
   3  -9  -4  338.07   31.20
   3  -9  -4  422.36   21.90
   3  -9   4  376.26   17.10
  -9  -3   4  413.46   22.50
  -3   9   4  399.86   17.70
   9   3   4  387.36   16.90
   3  -9   4  398.46   24.40
  -2   9  -4    0.20    0.90
   9   2  -4   -0.80    1.60
  -9  -2  -4    0.40    4.80
   2  -9  -4   -1.10    2.50
  -9  -2  -4    1.90    0.80
   2  -9   4    1.10    3.40
  -9  -2   4   -0.10    2.90
  -2   9   4    1.10    1.40
   9   2   4   -0.10    0.80
   2  -9   4    0.00    0.90
   1  -9  -4   30.20    5.40
   9   1  -4   35.40    5.40
  -9  -1  -4   39.70    9.70
   9   1  -4   33.90    3.30
  -9  -1  -4   37.50    2.20
  -1   9  -4   36.80    2.60
  -9  -1   4   38.60    6.10
   9   1   4   34.30    2.10
   1  -9   4   28.40    6.60
  -1   9   4   43.90    3.20
   9   0  -4   -0.90    1.50
  -9   0  -4    3.90    4.40
  -9   0  -4    0.60    0.50
   9   0  -4    3.10    2.60
   0  -9  -4    3.20    3.10
   9   0   4    0.10    0.70
   0   9   4   -0.30    1.30
   0  -9   4    5.90    4.00
  -9   0   4   -0.30    2.70
   9  -1  -4   37.90    3.60
   9  -1  -4   31.60    5.00
  -9   1  -4   35.30    8.90
   1   9  -4   35.00    2.80
   1   9   4   36.40    3.10
  -1  -9   4   48.70    7.80
  -9   1   4   40.60    7.00
   9  -2  -4    0.60    1.50
   2   9  -4    2.00    1.30
  -2  -9  -4    1.30    3.30
  -9   2  -4    3.60    4.90
   9  -2  -4   -0.70    2.40
   2   9   4    0.50    1.40
  -2  -9   4   -2.20    3.00
  -9   2   4    3.00    4.00
   9  -3  -4  365.36   20.30
   3   9  -4  411.76   17.50
  -9   3  -4  345.07   29.00
   9  -3  -4  411.26   18.10
  -3  -9  -4  416.96   23.40
  -3  -9   4  393.46   23.00
   3   9   4  399.76   17.40
  -9   3   4  410.76   25.70
  -4  -9  -4   72.69    9.50
   9  -4  -4   57.49    4.60
  -9   4  -4   58.99   12.90
   9  -4  -4   55.49    6.90
   4   9  -4   59.59    4.20
   4   9   4   65.29    4.20
  -9   4   4   67.69   12.50
  -4  -9   4   87.49   10.20
  -5  -9  -4    9.20    4.90
   9  -5  -4    6.70    2.20
   9  -5  -4    2.10    3.40
  -9   5  -4   10.40    7.70
   5   9  -4    7.40    2.00
   5   9   4    7.90    1.70
  -5  -9   4    7.10    4.10
  -9   5   4    4.50    6.20
   9  -6  -4    1.80    2.00
  -6  -9  -4   -2.50    3.10
  -9   6  -4   -6.80    6.70
   9  -6  -4    3.50    3.20
   6   9  -4    0.90    1.70
   6   9   4    0.10    1.50
  -6  -9   4   -1.40    3.70
   9  -7  -4   10.90    4.40
  -9   7  -4   21.60   10.40
   9  -7  -4    9.80    2.60
   7   9  -4   14.20    2.80
  -7  -9  -4    7.80    5.90
   7   9   4    8.60    1.90
  -7  -9   4   11.00    4.60
   9  -8  -4   18.70    3.10
   8   9  -4   15.00    2.80
  -9   8  -4   10.30   11.40
   9  -8  -4   12.60    4.90
  -8  -9  -4   14.80    6.40
   8   9   4   19.20    2.50
  -8  -9   4   13.20    5.20
   9  -9  -4   77.89    5.90
   9   9  -4   80.09    5.80
   9  -9  -4   65.79    9.50
  -9  -9  -4   95.49   14.20
   9  -9   4   90.29   13.30
  -9  -9   4   68.89   10.70
   9   9   4   83.49    5.20
  10   9  -4   65.09    5.40
   9 -10  -4   57.89    5.20
   9 -10  -4   47.00    8.10
 -10  -9  -4   53.39   11.60
 -10  -9   4   53.79   11.10
   9 -10   4   37.50   10.20
  10   9   4   55.59    4.40
   9 -10   4   49.10    3.00
   8 -10  -4    0.90    2.20
   8 -10  -4    1.80    4.30
 -10  -8  -4    0.20    5.30
  10   8  -4   -0.10    2.30
   8 -10   4    1.00    5.10
   8 -10   4   -0.10    0.80
  10   8   4    0.30    1.70
   8 -10   4   -1.60    0.80
 -10  -8   4    6.80    5.40
   7 -10  -4   29.10    6.40
 -10  -7  -4   26.80    8.20
   7 -10  -4   29.70    3.70
  -7  10  -4   30.90    2.20
   7 -10   4   30.10    2.30
 -10  -7   4   28.70    7.40
  10   7   4   34.20    3.10
  10   6  -4   18.00    3.10
   6 -10  -4   10.90    4.90
 -10  -6  -4   15.10    7.50
  -6  10  -4   16.20    1.60
   6 -10   4    4.00    6.10
  10   6   4   15.40    2.10
 -10  -6   4   -0.30    3.60
  -6  10   4   13.60    2.60
   6 -10   4   13.30    2.00
  10   5  -4    0.60    2.10
  -5  10  -4    2.90    1.10
 -10  -5  -4   -0.80    4.60
   5 -10  -4    7.60    4.00
 -10  -5   4    3.40    4.20
   5 -10   4   -1.80    4.40
  -5  10   4    0.90    1.80
   5 -10   4   -0.10    1.00
  10   5   4    1.20    1.30
 -10  -4  -4  141.19   16.80
   4 -10  -4  135.09   11.30
  10   4  -4  131.79    7.50
  -4  10  -4  131.19    6.30
  -4  10   4  142.59    7.40
  10   4   4  133.99    6.50
 -10  -4   4  131.79   11.90
   4 -10   4  137.69   13.10
   4 -10   4  128.59    6.50
  10   3  -4  152.08    8.70
   3 -10  -4  175.18   12.90
  -3  10  -4  176.38    7.80
 -10  -3  -4  155.68   16.20
 -10  -3  -4  166.48    7.80
 -10  -3   4  192.28   13.90
   3 -10   4  170.08   14.70
  10   3   4  171.18    7.70
  -3  10   4  161.58    8.50
 -10  -2  -4   57.89    3.20
  -2  10  -4   58.79    3.50
   2 -10  -4   59.69    8.20
 -10  -2  -4   45.40    9.70
  10   2  -4   58.09    4.50
  10   2   4   52.49    3.10
 -10  -2   4   56.39    9.50
   2 -10   4   58.09    9.40
  -2  10   4   55.59    4.10
 -10  -1  -4   15.40    7.10
  10   1  -4   15.80    2.60
  -1  10  -4   17.60    1.90
 -10  -1  -4   15.30    1.40
   1 -10  -4   14.20    4.70
   1 -10   4   16.20    5.40
  10   1   4   15.70    1.40
  -1  10   4   17.20    2.30
 -10  -1   4   14.00    4.70
   0 -10  -4   30.40    6.50
  10   0  -4   28.20    3.30
 -10   0  -4   37.90    9.40
   0  10  -4   24.60    2.40
 -10   0  -4   27.30    1.60
   0 -10   4   28.10    6.60
   0  10   4   27.70    2.90
 -10   0   4   23.40    5.70
  10   0   4   25.30    1.50
   1  10  -4   17.60    2.10
  -1 -10  -4   14.90    5.30
  10  -1  -4   11.90    4.60
  10  -1  -4   17.00    2.60
 -10   1  -4   10.60    7.60
  -1 -10   4   23.40    6.50
 -10   1   4    8.40    5.00
   1  10   4   16.00    2.20
   2  10  -4   54.79    3.80
  10  -2  -4   53.89    4.50
 -10   2  -4   40.10   10.80
  10  -2  -4   48.50    6.60
  -2 -10  -4   59.49    8.70
 -10   2   4   40.60    8.40
  -2 -10   4   60.69    9.30
   2  10   4   63.49    4.00
  -3 -10  -4  181.18   14.00
   3  10  -4  164.98    8.20
  10  -3  -4  167.88   11.70
  10  -3  -4  160.08    8.60
 -10   3  -4  169.08   21.90
   3  10   4  161.58    8.20
 -10   3   4  152.18   15.50
  -3 -10   4  148.69   13.80
 -10   4  -4  106.39   18.80
   4  10  -4  126.49    6.90
  -4 -10  -4  144.29   12.90
  10  -4  -4  127.99    7.50
  -4 -10   4  112.79   13.10
   4  10   4  134.29    7.00
 -10   4   4  158.88   18.40
 -10   5  -4   10.70    8.70
   5  10  -4    2.70    2.00
  10  -5  -4    1.10    2.10
  -5 -10  -4    0.10    3.40
  -5 -10   4    2.30    4.30
 -10   5   4   -2.50    6.50
   5  10   4    4.30    1.70
  -6 -10  -4   17.50    6.40
  10  -6  -4    9.40    4.40
   6  10  -4   17.10    2.60
 -10   6  -4   13.20    9.80
  10  -6  -4   13.30    2.70
   6  10   4   11.90    2.20
  -6 -10   4   10.70    4.60
  -7 -10  -4   29.00    8.00
   7  10  -4   31.80    3.70
  10  -7  -4   47.10    7.50
  10  -7  -4   44.70    4.40
  -7 -10   4   29.60    6.70
   7  10   4   32.00    3.30
  10  -8  -4   -0.30    4.10
   8  10  -4   -1.00    1.90
 -10   8  -4   11.90   10.90
  -8 -10  -4    5.40    5.90
  10  -8  -4    2.70    2.50
  -8 -10   4   -3.80    4.50
   8  10   4    2.00    2.00
  -9 -10  -4   46.30   10.90
 -10   9  -4   45.80   16.60
  10  -9  -4   54.79    8.80
   9  10  -4   61.19    5.20
  10  -9  -4   69.19    5.80
  -9 -10   4   40.30    8.80
   9  10   4   60.29    4.60
  10  -9   4   62.89   12.40
  10 -10  -4   79.49    6.20
  10 -10  -4   69.39   10.10
 -10 -10  -4   63.79   12.50
  10  10  -4   81.89    6.00
  10 -10   4   84.29   14.00
 -10 -10   4   40.20   10.10
  10  10   4   78.49    5.30
 -11 -10  -4    0.70    5.60
  10 -11  -4    7.70    5.40
  10 -11  -4    0.30    2.60
  11  10  -4    0.40    2.70
  11  10   4    2.80    2.10
 -11 -10   4    6.40    6.40
  10 -11   4    0.60    6.20
  11   9  -4    9.30    3.00
   9 -11  -4   11.10    3.00
 -11  -9  -4    8.90    8.00
   9 -11  -4   16.10    5.40
 -11  -9   4    5.40    6.00
  11   9   4   11.20    2.40
   9 -11   4    9.20    1.70
   9 -11   4   -1.20    6.60
  11   8  -4   37.80    4.30
 -11  -8  -4   17.20    8.20
   8 -11  -4   31.90    4.20
   8 -11  -4   19.30    5.90
   8 -11   4   31.50    9.60
   8 -11   4   30.00    2.30
  11   8   4   35.40    3.30
 -11  -7  -4   -1.50    5.70
  11   7  -4    0.00    2.20
   7 -11  -4    2.10    4.40
  -7  11  -4    0.40    1.00
   7 -11  -4   -1.50    2.00
  -7  11   4    0.70    2.10
 -11  -7   4    5.40    4.80
   7 -11   4    4.30    6.20
  11   7   4   -1.90    1.40
  11   6  -4   31.10    4.00
   6 -11  -4   44.20    7.50
  -6  11  -4   31.00    2.50
 -11  -6  -4   28.90    9.10
  11   6   4   35.00    3.10
   6 -11   4   42.30    9.70
  -6  11   4   34.00    3.80
   6 -11   4   26.00    2.50
 -11  -6   4   47.00    8.60
  -5  11  -4   33.30    2.60
 -11  -5  -4   26.20    9.40
   5 -11  -4   36.30    7.10
  11   5  -4   37.30    4.00
 -11  -5   4   38.80    7.80
   5 -11   4   42.20    9.30
  11   5   4   34.80    3.00
  -5  11   4   35.50    3.70
   4 -11  -4   23.60    6.00
 -11  -4  -4    4.70    6.50
  11   4  -4   21.10    3.20
  -4  11  -4   20.00    2.30
  11   4   4   21.30    2.20
   4 -11   4   26.20    7.70
  -4  11   4   20.50    2.80
 -11  -4   4   20.50    6.10
  11   3  -4   -0.70    1.90
 -11  -3  -4    2.20    4.20
 -11  -3  -4    1.10    1.30
  -3  11  -4    0.70    1.20
   3 -11  -4   -0.90    3.40
  -3  11   4    0.50    1.70
 -11  -3   4   -1.50    4.00
  11   3   4    0.10    1.00
   3 -11   4    2.10    4.40
   2 -11  -4   49.20    8.20
  11   2  -4   45.80    4.30
 -11  -2  -4   42.20   10.20
  -2  11  -4   46.30    3.30
 -11  -2  -4   48.90    3.20
  -2  11   4   51.79    4.00
  11   2   4   51.09    2.90
   2 -11   4   48.80    9.30
 -11  -2   4   49.10    8.40
 -11  -1  -4   14.10    1.40
  11   1  -4   10.50    2.50
  -1  11  -4   14.30    1.90
 -11  -1  -4   24.50    8.80
   1 -11  -4   15.30    4.90
  -1  11   4   13.60    2.50
   1 -11   4    7.80    5.10
 -11  -1   4   10.60    5.00
  11   1   4   15.50    1.40
 -11   0  -4   53.49   12.00
 -11   0  -4   84.39    3.80
  11   0  -4   85.79    5.60
   0 -11  -4  110.19   12.20
   0  11  -4   85.49    4.80
  11   0   4   79.89    3.80
   0 -11   4   88.79   11.90
 -11   0   4   63.89   10.00
   0  11   4   75.69    5.10
 -11   1  -4    5.40    6.50
   1  11  -4    8.60    1.90
  11  -1  -4   17.60    2.90
  -1 -11  -4   17.10    5.50
  11  -1   4   13.00    0.70
   1  11   4   13.50    2.30
  11  -1   4   14.90    0.80
  -1 -11   4   10.00    4.70
 -11   1   4   16.90    7.90
   2  11  -4   49.60    3.80
  11  -2  -4   43.10    4.20
  -2 -11  -4   47.00    8.40
 -11   2  -4   48.80   12.30
  -2 -11   4   48.40    8.50
   2  11   4   56.19    4.10
  -3 -11  -4    0.80    4.40
 -11   3  -4   -3.10    5.80
  11  -3  -4   -1.20    1.80
   3  11  -4    1.30    1.70
  -3 -11   4   -0.40    4.80
   3  11   4   -2.50    1.60
 -11   4  -4   38.20   11.80
  11  -4  -4   22.90    3.30
  -4 -11  -4   20.60    6.40
   4  11  -4   18.80    2.60
 -11   4   4   21.00    8.60
  -4 -11   4   23.50    7.10
   4  11   4   19.90    2.80
  11  -5  -4   39.10    4.10
   5  11  -4   35.40    3.60
  -5 -11  -4   38.60    8.70
 -11   5  -4   17.90   11.10
 -11   5   4   26.40   11.10
   5  11   4   37.90    3.40
  -5 -11   4   34.90    8.40
  11  -6  -4   31.10    3.80
   6  11  -4   34.50    5.00
  -6 -11  -4   42.60    8.80
 -11   6  -4   14.90    9.80
  -6 -11   4   39.10    8.70
   6  11   4   28.20    3.40
 -11   6   4   28.00   11.80
  11  -7  -4   -5.00    3.40
 -11   7  -4    0.80   11.00
   7  11  -4    0.10    2.00
  -7 -11  -4    3.30    5.30
  11  -7  -4   -0.40    2.10
  -7 -11   4   11.80    5.70
   7  11   4    0.40    1.90
  -8 -11  -4   34.10    9.50
   8  11  -4   30.60    3.60
 -11   8  -4   41.60   16.00
  11  -8  -4   27.50    6.90
  11  -8  -4   28.60    3.70
  -8 -11   4   38.30    8.80
   8  11   4   31.00    3.60
 -11   9  -4   16.50   14.30
   9  11  -4    8.50    2.70
  -9 -11  -4   13.40    7.90
  11  -9  -4   19.50    5.90
  11  -9  -4   12.10    3.20
  -9 -11   4    3.80    5.50
  11  -9   4    8.40    6.50
   9  11   4    3.40    2.30
  10  11  -4    1.10    2.50
  11 -10  -4    4.80    5.20
 -10 -11  -4   -2.10    6.00
  11 -10  -4    3.00    2.60
  11 -10   4   -1.30    6.30
 -10 -11   4   -9.90    6.50
  10  11   4   -1.50    1.90
  11  11  -4    7.60    2.90
  11 -11  -4    9.90    6.20
  11 -11  -4   11.00    3.30
 -11 -11  -4   17.50    9.20
  11  11   4   11.30    2.70
 -11 -11   4   12.00    7.10
  11 -11   4    9.10    8.90
  11 -12  -4   10.80    6.20
 -12 -11  -4   -3.20    7.50
  11 -12  -4    7.00    3.20
  12  11  -4   -3.40    2.60
 -12 -11   4   -3.50    6.40
  11 -12   4   13.20    8.20
  12  11   4    3.60    2.40
 -12 -10  -4    3.90    7.30
  12  10  -4    0.30    2.70
  10 -12  -4    3.50    2.60
 -12 -10   4    9.00    7.00
  12  10   4    2.70    2.20
  10 -12   4   -3.50    7.00
 -12  -9  -4    3.50    7.10
   9 -12  -4   -2.00    2.30
   9 -12  -4   -9.50    4.80
  12   9  -4   -5.90    2.40
  12   9   4   -1.10    2.00
 -12  -9   4   -8.90    5.80
   9 -12   4   -4.60    6.10
  12   8  -4    6.50    2.80
   8 -12  -4    6.50    5.20
   8 -12  -4    2.90    2.40
 -12  -8  -4    7.70    6.60
   8 -12   4    4.30    1.30
  12   8   4    3.90    3.00
 -12  -8   4    3.80    6.00
   8 -12   4    7.10    7.70
   7 -12  -4   27.00    7.20
 -12  -7  -4   51.19   11.50
  -7  12  -4   31.10    2.60
  12   7  -4   31.80    4.10
 -12  -7   4   44.30   11.30
   7 -12   4   29.70    8.70
  12   7   4   29.00    3.10
  -7  12   4   39.80    4.20
  12   6  -4   44.20    4.70
   6 -12  -4   53.69    9.50
 -12  -6  -4   65.99   12.20
 -12  -6   4   57.69   10.50
  -6  12   4   49.60    4.60
   6 -12   4   54.39   10.80
  12   6   4   43.60    3.80
 -12  -5  -4   -1.40    6.30
  12   5  -4    4.60    2.40
   5 -12  -4    3.50    4.80
  -5  12  -4    2.20    1.40
  12   5   4    3.20    1.60
  -5  12   4    1.60    2.00
 -12  -5   4   -5.70    4.70
   5 -12   4    4.70    5.40
 -12  -4  -4   -3.30    4.50
  -4  12  -4    4.40    1.50
  12   4  -4    9.00    2.70
   4 -12  -4    0.40    4.30
 -12  -4   4    4.50    5.30
  -4  12   4    6.10    2.30
   4 -12   4    3.50    5.70
  12   4   4    5.80    1.50
  12   3  -4    0.10    2.30
   3 -12  -4    8.00    5.30
  -3  12  -4   -0.30    1.30
 -12  -3  -4   -5.70    5.00
  12   3   4    1.60    1.20
 -12  -3   4    2.80    4.90
   3 -12   4    1.00    5.00
  12   2  -4   -0.40    2.00
 -12  -2  -4    5.30    7.20
 -12  -2  -4    1.00    1.10
  -2  12  -4    1.80    1.40
   2 -12  -4    1.50    4.70
   2 -12   4    2.40    5.20
  12   2   4    3.10    1.10
  -2  12   4   -0.20    1.80
 -12  -2   4   -3.30    4.20
 -12  -1  -4    6.60    7.20
  12   1  -4   10.50    2.70
 -12  -1  -4   12.00    1.40
  -1  12  -4   11.90    2.00
   1 -12  -4   16.70    6.30
   1 -12   4   21.30    6.50
  -1  12   4    8.20    2.20
 -12  -1   4    9.90    5.60
  12   1   4   13.30    1.40
 -12   0  -4  134.59   19.50
   0 -12  -4  135.79   12.50
   0  12  -4  137.99    6.90
 -12   0  -4  127.69    5.80
  12   0  -4  130.69    7.70
   0 -12   4  130.89   13.90
 -12   0   4  100.29   13.80
  12   0   4  130.29    5.70
   0  12   4  135.29    7.30
  12  -1  -4   11.90    2.70
 -12   1  -4    4.70    7.60
   1  12  -4    9.20    2.00
  -1 -12  -4   10.30    5.50
  12  -1   4   12.60    0.70
  12  -1   4   11.10    0.70
 -12   1   4    5.10    5.60
  -1 -12   4   13.20    5.90
   1  12   4   10.20    2.20
   2  12  -4    0.70    1.60
  -2 -12  -4    7.50    4.60
  12  -2  -4    1.90    2.10
   2  12   4    0.40    2.70
  -2 -12   4   -2.10    4.20
 -12   2   4   -5.50    4.80
 -12   3  -4    4.20    7.70
  12  -3  -4    0.80    2.30
   3  12  -4    0.50    1.80
  -3 -12  -4    3.90    5.30
   3  12   4   -0.90    2.20
 -12   3   4    2.50    6.70
  -3 -12   4   -0.70    4.30
 -12   4  -4    6.20   10.00
  12  -4  -4    1.20    2.40
   4  12  -4    4.30    1.90
  -4 -12  -4    9.00    5.00
 -12   4   4    3.80    8.10
  -4 -12   4   -0.50    6.20
   4  12   4    3.00    2.00
  -5 -12  -4    8.60    5.70
  12  -5  -4   -3.00    2.10
   5  12  -4    1.10    2.10
 -12   5  -4   -2.40    9.80
  -5 -12   4    1.30    5.20
 -12   5   4    4.80    8.80
   5  12   4   -1.00    2.00
   6  12  -4   49.40    4.50
 -12   6  -4   43.40   15.10
  -6 -12  -4   38.50    9.70
  -6 -12   4   31.60    8.30
 -12   6   4   69.09   14.50
   6  12   4   49.99    4.40
  -7 -12  -4   23.20    8.60
  12  -7  -4   27.10    6.50
   7  12  -4   27.10    3.50
 -12   7  -4   38.80   15.40
  12  -7  -4   31.40    4.00
   7  12   4   28.40    3.30
  -7 -12   4   44.80    9.00
   8  12  -4    6.80    2.70
  12  -8  -4    4.20    4.60
 -12   8  -4    9.10   12.20
  -8 -12  -4    0.80    5.80
  12  -8  -4    3.60    2.60
   8  12   4   -1.40    2.20
  -8 -12   4    0.20    5.90
  12  -9  -4    0.70    5.10
 -12   9  -4   20.80   17.10
   9  12  -4   -0.90    2.40
  -9 -12  -4    4.50    7.30
  12  -9  -4   -2.00    2.20
  -9 -12   4    5.80    6.30
  12  -9   4    2.70    7.40
   9  12   4   -0.20    2.20
  10  12  -4    2.80    2.60
  12 -10  -4    1.40    5.80
 -10 -12  -4   -1.70    7.40
  12 -10  -4    0.50    2.60
  10  12   4    5.00    2.50
 -10 -12   4   -3.90    5.40
  12 -10   4    4.90    7.40
  12 -11  -4    5.60    2.90
 -11 -12  -4   -0.90    7.20
  11  12  -4    6.70    2.70
  12 -11  -4    8.50    6.40
  11  12   4    4.60    2.60
 -11 -12   4    7.80    7.80
  12 -11   4   -2.10    7.10
  10 -13  -4    4.20    6.70
 -13 -10  -4    1.10    9.00
  13  10  -4    7.90    2.90
  10 -13  -4   12.10    3.20
  13  10   4    8.20    2.60
 -13 -10   4   15.10    8.30
  10 -13   4   20.80    9.10
   9 -13  -4    0.10    2.60
   9 -13  -4    6.50    5.70
 -13  -9  -4   -0.90    7.40
  13   9  -4    4.30    3.00
 -13  -9   4   -1.90    6.60
  13   9   4    2.80    2.20
   9 -13   4    1.80    8.00
  13   8  -4    2.70    2.70
   8 -13  -4   -3.20    2.20
   8 -13  -4   -0.50    5.40
 -13  -8  -4   -1.60    7.20
  13   8   4    0.60    1.90
 -13  -8   4    0.70    6.00
   8 -13   4   10.40    8.70
   7 -13  -4   58.49    9.90
 -13  -7  -4   58.39   13.70
  -7  13  -4   59.89    3.80
  13   7  -4   57.69    5.50
  -7  13   4   64.79    5.50
   7 -13   4   61.39   12.80
  13   7   4   53.99    4.50
 -13  -7   4   64.79   11.80
  -6  13  -4   59.29    3.80
 -13  -6  -4   56.39   12.40
   6 -13  -4   54.89    9.90
  13   6  -4   54.29    5.30
  -6  13   4   54.69    5.00
   6 -13   4   45.30   10.90
  13   6   4   55.99    4.30
 -13  -6   4   53.19   11.60
  13   5  -4    3.00    2.60
 -13  -5  -4    6.40    7.50
  -5  13  -4    2.60    1.50
   5 -13  -4   -1.40    4.40
  13   5   4    1.10    1.50
   5 -13   4   11.70    6.80
  -5  13   4    2.00    2.30
 -13  -5   4    9.40    7.10
  -4  13  -4   20.30    2.20
  13   4  -4   17.70    3.30
 -13  -4  -4   24.50   10.20
   4 -13  -4   19.60    6.70
  13   4   4   19.40    2.30
   4 -13   4   17.60    7.70
 -13  -4   4   12.30    7.20
  -4  13   4   15.30    2.90
  13   3  -4   10.20    2.90
 -13  -3  -4    9.70    8.30
   3 -13  -4    3.60    5.50
  -3  13  -4   10.50    2.00
 -13  -3   4    6.80    6.10
   3 -13   4    2.00    5.30
  13   3   4   10.10    1.60
  -3  13   4    5.40    2.60
  -2  13  -4    7.70    1.90
   2 -13  -4    4.50    5.70
  13   2  -4    4.30    2.50
 -13  -2  -4   12.50    7.30
  -2  13   4    7.80    2.40
 -13  -2   4    2.80    5.90
  13   2   4    5.30    1.30
   2 -13   4    8.50    6.00
   1 -13  -4   53.09    9.50
 -13  -1  -4   37.10   12.00
 -13  -1  -4   48.20    3.10
  -1  13  -4   44.20    3.60
  13   1  -4   36.80    4.20
 -13  -1   4   43.10    9.90
  -1  13   4   40.70    4.00
  13   1   4   42.10    2.60
   1 -13   4   24.90    7.70
   0 -13  -4   92.49   12.10
   0  13  -4  110.29    5.90
 -13   0  -4   85.49   16.50
   0  13   4  106.29    6.40
 -13   0   4   90.29   13.70
   0 -13   4   91.29   13.50
  13   0   4   96.99    4.60
  -1 -13  -4   53.69   10.10
  13  -1  -4   51.49    6.80
 -13   1  -4   17.00    9.90
   1  13  -4   41.00    3.70
   1  13   4   49.99    4.40
  -1 -13   4   54.89   10.10
 -13   1   4   44.50   10.00
  -2 -13  -4    1.30    4.30
   2  13  -4    4.70    1.90
 -13   2  -4   16.50    9.20
 -13   2   4   11.60    7.30
   2  13   4    3.70    2.20
  -2 -13   4    2.00    5.50
  13  -3  -4   13.70    4.90
   3  13  -4   10.80    2.40
 -13   3  -4   -4.00    6.40
  -3 -13  -4   10.50    6.40
 -13   3   4    7.40    8.10
   3  13   4   14.20    2.80
  -3 -13   4   17.20    7.20
 -13   4  -4    9.00   10.90
  13  -4  -4   14.50    3.10
  -4 -13  -4   13.50    6.80
   4  13  -4   18.10    2.90
  -4 -13   4   14.70    7.30
 -13   4   4   16.50   10.30
   4  13   4   15.90    2.80
  -5 -13  -4    2.30    6.30
   5  13  -4    0.40    1.80
  13  -5  -4   -0.10    2.40
 -13   5  -4    1.60   11.40
 -13   5   4    0.10    9.50
   5  13   4   -0.40    2.10
  -5 -13   4    2.70    5.50
  13  -6  -4   48.30    5.10
  -6 -13  -4   80.39   13.30
   6  13  -4   58.09    4.90
 -13   6  -4   28.80   12.10
   6  13   4   59.99    5.00
  -6 -13   4   68.79   11.90
 -13   6   4   31.70   13.60
   7  13  -4   60.79    5.40
  -7 -13  -4   72.19   12.50
 -13   7  -4   41.80   16.80
  13  -7  -4   59.99    5.60
  13  -7  -4   53.69    9.60
  -7 -13   4   68.79   11.80
   7  13   4   62.19    5.20
  13  -8  -4    4.10    2.70
  13  -8  -4   -2.50    5.10
  -8 -13  -4   -0.40    6.50
 -13   8  -4    0.40   14.20
   8  13  -4   -3.00    2.00
  -8 -13   4   -3.80    5.50
   8  13   4   -0.90    2.20
  13  -9  -4    2.80    2.80
 -13   9  -4  -11.90   17.30
  -9 -13  -4  -13.30    5.60
  13  -9  -4   -3.40    6.00
   9  13  -4    0.80    2.50
   9  13   4    6.40    2.60
  -9 -13   4   -2.50    5.90
  13 -10  -4   -4.30    5.90
 -10 -13  -4    7.40    8.30
  10  13  -4    4.40    2.80
  13 -10  -4   13.00    3.40
  13 -10   4    2.20    8.40
  10  13   4   16.70    4.90
   8 -14  -4    0.80    6.20
   8 -14  -4    8.10    3.10
 -14  -8  -4    2.30    8.90
  14   8  -4   12.10    6.00
  14   8   4    6.90    2.40
   8 -14   4   20.30    9.50
 -14  -8   4    2.50    7.80
  14   7  -4    3.30    3.00
 -14  -7  -4    5.40    9.10
   7 -14  -4    9.80    6.80
  -7  14  -4   11.00    1.90
 -14  -7   4    8.40    7.60
  14   7   4    7.20    2.30
  -7  14   4    7.70    2.80
   7 -14   4   -2.30    6.30
  14   6  -4   11.10    3.30
   6 -14  -4   16.80    7.10
 -14  -6  -4   19.40    9.40
  -6  14  -4    9.30    1.90
  14   6   4   12.30    2.40
   6 -14   4    8.30    7.00
  -6  14   4    5.10    2.80
 -14  -6   4   23.60    8.60
 -14  -5  -4   36.70   11.40
  -5  14  -4   19.30    2.50
  14   5  -4   27.70    3.90
  -5  14   4   18.10    3.30
   5 -14   4   14.00    7.90
 -14  -5   4   17.30    8.30
  14   5   4   21.60    2.60
  -4  14  -4    2.00    1.60
  14   4  -4   -4.70    2.00
 -14  -4  -4   10.20    8.00
   4 -14  -4    0.00    5.70
 -14  -4   4    5.30    7.00
   4 -14   4   -4.50    5.60
  14   4   4    2.60    1.60
  -4  14   4   -0.70    2.40
 -14  -3  -4    9.50    9.80
  -3  14  -4   27.50    2.90
  14   3  -4   24.40    3.90
   3 -14  -4   35.60    8.30
   3 -14   4   41.00   10.10
 -14  -3   4   44.20   10.60
  -3  14   4   29.80    3.70
  14   3   4   26.80    2.50
  14   2  -4    3.60    2.80
   2 -14  -4   10.30    6.00
  -2  14  -4    7.10    2.20
 -14  -2  -4   -3.20    7.00
  14   2   4    7.00    1.40
 -14  -2   4    4.60    6.40
   2 -14   4   -1.60    5.60
  -2  14   4    8.00    2.70
  14   1  -4   12.80    3.10
  -1  14  -4   17.80    2.50
 -14  -1  -4    9.40    9.40
   1 -14  -4   15.80    6.50
  14   1   4   14.80    1.60
  -1  14   4   13.20    2.70
   1 -14   4   23.30    8.10
 -14  -1   4    9.20    7.50
 -14   0  -4   13.70    9.40
   0  14  -4    8.20    2.40
  14   0  -4    5.40    2.70
   0 -14   4    4.90    6.00
 -14   0   4   17.40    8.60
  14   0   4    5.90    0.90
   0  14   4    6.90    2.50
 -14   1  -4   35.50   12.80
   1  14  -4   18.10    2.80
  14  -1  -4   19.70    3.40
  -1 -14  -4   15.80    6.50
  -1 -14   4   23.70    7.90
   1  14   4   15.50    3.10
 -14   1   4   19.60    9.30
  -2 -14  -4   -0.70    5.20
 -14   2  -4   -1.50    8.90
   2  14  -4    4.50    2.10
  14  -2  -4    5.90    2.60
 -14   2   4    4.60    9.10
   2  14   4    5.20    2.40
  -2 -14   4    4.70    7.00
  -3 -14  -4   34.90    9.00
 -14   3  -4    0.00   10.00
  14  -3  -4   25.60    3.70
   3  14  -4   27.50    3.30
 -14   3   4   25.60   12.40
  -3 -14   4   10.10    7.40
   3  14   4   23.40    3.30
  -4 -14  -4    8.60    6.20
   4  14  -4    0.90    2.00
 -14   4  -4    7.50   10.40
  14  -4  -4    0.20    2.60
 -14   4   4    6.40   10.90
   4  14   4    0.40    2.10
  -4 -14   4    0.00    6.30
  14  -5  -4   27.70    4.00
 -14   5  -4   23.20   12.20
  -5 -14  -4   21.30    7.70
   5  14  -4   19.50    3.20
 -14   5   4   21.90   13.60
  -5 -14   4   25.70    8.30
   5  14   4   17.30    3.20
 -14   6  -4   22.70   15.20
   6  14  -4   13.70    3.00
  14  -6  -4   13.60    3.40
  -6 -14  -4    8.60    6.80
   6  14   4    4.90    2.40
 -14   6   4   30.10   15.40
  -6 -14   4    3.90    5.90
  14  -7  -4    6.50    2.90
  -7 -14  -4    6.10    8.20
  14  -7  -4    3.80    5.90
   7  14  -4    6.70    2.70
 -14   7  -4   -7.70   14.60
   7  14   4    7.00    2.90
  -7 -14   4    8.40    6.70
 -14   8  -4  -16.00   16.30
   8  14  -4   12.70    3.90
  14  -8  -4    0.10    6.60
  14  -8  -4   11.80    3.00
  -8 -14  -4   17.20    9.10
  -8 -14   4    5.30    8.40
   8  14   4   16.00    5.30
  -6  15  -4    2.20    1.80
   6 -15  -4   -3.70    6.50
  15   6  -4   -4.20    3.00
 -15  -6  -4   -8.60    9.50
  -6  15   4    0.10    2.60
  15   6   4    1.30    2.10
 -15  -6   4    5.20    8.20
   6 -15   4  -11.90    6.80
  -5  15  -4    1.00    1.80
 -15  -5  -4    9.90   12.20
  15   5  -4    3.60    2.80
   5 -15  -4    5.30    6.50
 -15  -5   4   -4.70    7.70
  15   5   4    0.30    1.70
   5 -15   4    5.00    7.40
  -5  15   4    3.90    2.60
 -15  -4  -4    7.20   10.10
  15   4  -4    7.70    3.10
  -4  15  -4    7.80    2.10
   4 -15  -4   15.90    7.70
  15   4   4    7.10    1.90
 -15  -4   4    2.30    8.00
   4 -15   4    7.00    6.80
  -4  15   4    7.10    2.70
 -15  -3  -4   19.20   11.10
  -3  15  -4   24.40    4.40
  15   3  -4   19.10    3.80
   3 -15  -4   11.30    7.10
 -15  -3   4    9.00   10.10
  -3  15   4   20.20    3.30
   3 -15   4   20.80    8.20
  15   3   4   22.20    2.30
  -2  15  -4   -0.60    1.70
   2 -15  -4    0.00    6.20
  15   2  -4   -3.30    2.30
 -15  -2  -4   17.50   10.50
   2 -15   4    3.00    6.70
  -2  15   4    2.60    2.40
 -15  -2   4  -11.90    6.50
  15   1  -4   -2.00    2.30
   1 -15  -4    1.40    5.80
 -15  -1  -4   -6.80    9.90
  -1  15  -4   -1.90    1.70
  -1  15   4    0.40    2.30
   1 -15   4    3.70    6.20
  15   0  -4   -2.30    2.20
 -15   0  -4   -9.00    8.40
   0  15  -4    3.40    1.90
   0 -15  -4   -8.50    5.40
   0  15   4   -0.10    2.20
   0 -15   4   12.80    7.30
 -15   0   4    0.20    8.50
  -1 -15  -4    3.80    6.60
  15  -1  -4   -1.40    2.50
 -15   1  -4  -15.30    8.50
   1  15  -4   -1.00    1.80
  -1 -15   4   -3.30    5.90
   1  15   4    0.70    2.40
 -15   1   4    6.30    9.80
  15  -2  -4    0.30    2.50
 -15   2  -4   16.70   12.60
   2  15  -4    1.10    2.00
  -2 -15  -4   -7.10    5.20
 -15   2   4    7.00   11.40
  -2 -15   4    2.70    6.50
   2  15   4   -1.10    2.30
   3  15  -4   23.30    3.30
  -3 -15  -4   19.20    7.60
  15  -3  -4   17.30    3.40
 -15   3  -4   12.60   11.50
   3  15   4   24.80    3.60
  -3 -15   4   24.20    8.90
 -15   3   4   17.80   12.20
   4  15  -4    6.50    2.50
 -15   4  -4    8.70   12.60
  15  -4  -4   14.60    3.20
  -4 -15  -4   17.70    7.90
  -4 -15   4   20.20    8.90
   4  15   4    4.90    2.60
 -15   4   4   15.10   14.40
  -5 -15  -4    4.20    7.10
  15  -5  -4    3.40    2.90
   5  15  -4    6.60    2.70
 -15   5  -4  -22.70   12.60
   5  15   4    5.80    2.70
  -5 -15   4   -8.20    5.70
  -6 -15  -4    8.20    6.80
   6  15  -4   -2.00    3.20
  15  -6  -4    2.50    2.60
 -15   6  -4  -11.70   14.70
 -15   6   4   19.70   18.10
   6  15   4    2.10    2.70
  -3  16  -4   30.60    3.20
   3 -16  -4   35.60    9.80
 -16  -3  -4   36.60   13.50
  16   3  -4   26.70    4.10
  -3  16   4   24.70    4.20
   3 -16   4   25.90    8.60
 -16  -3   4   31.40   10.90
   2 -16  -4    6.80    6.60
  -2  16  -4    8.90    2.30
  16   2  -4    2.80    3.10
 -16  -2  -4    2.90   11.60
   2 -16   4   -3.80    6.70
 -16  -2   4   14.60    9.10
  -2  16   4    0.60    2.90
   1 -16  -4    5.70    7.30
  -1  16  -4    5.80    2.20
 -16  -1  -4    6.40   10.90
  16   1  -4    4.20    3.00
  -1  16   4    2.90    4.40
   1 -16   4   -3.90    7.30
 -16  -1   4   -2.30   10.10
  16   0  -4    5.70    2.90
   0  16  -4    5.00    2.30
   0 -16  -4    3.70    7.10
 -16   0  -4   -7.30   13.70
   0  16   4    7.90    4.40
 -16   0   4   18.10   11.20
  16  -1  -4    9.00    3.30
   1  16  -4    5.10    2.30
  -1 -16  -4   -4.90    6.60
 -16   1  -4   29.70   14.90
 -16   1   4    7.70   12.10
  -1 -16   4   -6.90   10.80
   1  16   4    5.00    3.30
  16  -2  -4    8.40    3.10
  -2 -16  -4   -2.20    6.50
   2  16  -4    2.60    2.40
 -16   2  -4    3.40   12.60
 -16   2   4   10.10   12.10
   2  16   4    2.80    2.60
  -2 -16   4    1.30    6.90
   3  16  -4   31.60    3.90
  16  -3  -4   22.60    3.90
  -3 -16  -4   24.00    8.80
 -16   3  -4   23.30   15.90
   3  16   4   35.40    4.30
 -16   3   4    9.40   14.60
  -3 -16   4   49.30   11.30
   0   0  -5  356.36   15.10
   0   0  -5  331.07   19.80
   0   0  -5  359.26   15.00
   0   0   5  356.46   16.50
  -1   0  -5   95.19    4.50
   0  -1  -5  105.19    4.80
   0   1  -5  119.59    4.80
   0  -1  -5  103.49    7.50
   0   1  -5   89.29    4.70
  -1   0  -5   84.99    8.50
   0  -1  -5   94.69    4.70
  -1   0  -5   96.39    4.60
   1   0  -5   93.59    4.80
   0   1   5   98.29    5.30
   0  -1   5   91.09    7.10
   0  -1   5   95.19    6.20
  -1   0   5   96.39    5.40
  -1   0   5   98.79    5.20
   1   0   5   93.79    6.40
   1  -1  -5   94.89    4.50
  -1   1  -5   90.09    4.20
  -1   1  -5   91.49    4.30
  -1   1  -5  103.29   10.30
  -1  -1  -5   93.89    4.40
   1   1  -5   84.29    4.50
   1  -1  -5   92.09    4.60
  -1  -1  -5   94.49    4.30
  -1  -1  -5   82.39    7.10
   1  -1   5   95.39    7.20
  -1  -1   5   87.69    4.40
   1   1   5   87.19    5.70
  -1  -1   5  100.49    6.90
  -1   1   5   78.79    4.00
  -1   1   5   88.19    4.10
  -1  -1   5   85.49    5.90
   1  -2  -5  383.96   17.10
   1  -2  -5  416.46   17.10
   2   1  -5  383.26   17.00
  -2  -1  -5  397.46   16.80
  -1   2  -5  407.26   16.70
  -2  -1  -5  376.66   16.60
  -1   2  -5  368.66   24.90
  -2  -1  -5  381.76   20.90
   1  -2  -5  384.56   16.90
   1  -2   5  378.26   16.70
  -2  -1   5  400.16   17.70
   1  -2   5  448.26   20.20
   2   1   5  408.26   19.20
  -2  -1   5  444.16   20.80
   1  -2   5  425.36   22.10
   0  -2  -5  227.58   10.50
   2   0  -5  253.27   10.80
   0   2  -5  238.98   10.50
   2   0  -5  236.58   10.70
   0  -2  -5  241.28   12.40
  -2   0  -5  240.48   10.30
  -2   0  -5  242.58   10.30
   0  -2  -5  250.47   10.70
  -2   0  -5  209.28   15.00
   0  -2   5  295.07   16.00
   2   0   5  240.18   13.20
  -2   0   5  246.68   10.40
  -2   0   5  238.48   10.50
   0  -2   5  252.67   13.00
   0   2   5  235.98   11.10
   0  -2   5  233.18   10.50
  -2   1  -5  393.36   23.90
  -1  -2  -5  386.16   16.70
   2  -1  -5  399.16   17.00
  -2   1  -5  408.56   16.60
  -1  -2  -5  384.56   19.50
   2  -1  -5  384.06   17.10
  -2   1  -5  383.56   16.50
   1   2  -5  392.16   16.90
  -1  -2   5  410.06   18.80
  -1  -2   5  449.46   22.70
   2  -1   5  419.76   20.80
  -1  -2   5  406.16   16.90
   1   2   5  389.66   18.20
   1   2   5  390.66   16.90
  -2   2  -5   31.70    1.80
   2  -2  -5   37.60    2.60
  -2   2  -5   25.70    7.10
  -2   2  -5   32.40    1.90
  -2  -2  -5   28.60    1.90
   2  -2  -5   33.60    2.30
  -2  -2  -5   25.20    4.30
   2   2  -5   32.00    2.40
  -2  -2   5   37.10    6.60
   2   2   5   32.00    2.10
   2  -2   5   34.50    5.90
  -2  -2   5   37.20    3.30
  -2  -2   5   25.80    2.20
   2   2   5   31.00    3.70
   2  -3  -5   79.99    4.10
   3   2  -5   73.29    5.70
   2  -3  -5   78.49    4.30
  -2   3  -5   56.99   11.00
   3   2  -5   82.99    4.30
  -3  -2  -5   71.29    7.00
  -3  -2  -5   80.69    3.70
  -2   3  -5   78.49    3.60
   2  -3   5   91.19    9.30
  -3  -2   5   73.09    5.20
   3   2   5   69.69    5.90
   2  -3   5   75.29    3.60
   3   2   5   78.29    3.80
  -3  -2   5   77.79    4.20
   1  -3  -5   17.90    1.90
   3   1  -5   28.20    2.50
  -3  -1  -5   20.50    1.40
   1  -3  -5   22.00    2.10
   1  -3  -5   20.20    1.80
  -3  -1  -5   19.00    4.40
  -1   3  -5   24.30    1.60
   3   1   5   24.60    1.60
  -3  -1   5   26.00    4.60
   1  -3   5   21.60    1.60
   1  -3   5   32.90    6.70
  -3  -1   5   16.80    1.80
   3   1   5   22.20    3.70
  -3  -1   5   25.60    2.30
  -1   3   5   18.30    1.90
   1  -3   5   20.40    3.80
  -1   3   5   24.00    1.80
   0   3  -5 2229.28   91.09
  -3   0  -5 2245.08   90.79
   3   0  -5 2235.28   91.49
   0  -3  -5 2223.98   92.79
  -3   0  -5 2191.98   97.69
  -3   0  -5 2239.68   90.79
   3   0  -5 2256.17   91.49
   0  -3  -5 2169.98   91.09
   0   3   5 2181.38   91.99
   0   3   5 2267.87   91.29
   3   0   5 2286.17   94.99
   0  -3   5 2163.68   91.09
   0  -3   5 2460.45  100.09
  -3   0   5 2086.19   91.29
   0  -3   5 2312.67   94.49
   3  -1  -5   17.30    1.80
  -3   1  -5   21.70    1.30
  -1  -3  -5   23.90    3.50
   3  -1  -5   23.20    2.20
   1   3  -5   17.80    1.70
  -3   1  -5   20.20    1.50
  -3   1  -5   17.40    6.00
  -1  -3   5   36.80    7.20
   1   3   5   22.30    1.90
  -1  -3   5   22.00    3.40
  -1  -3   5   21.10    1.80
   3  -1   5   30.40    5.00
   1   3   5   23.80    2.90
  -3   2  -5   92.89   13.20
   2   3  -5   81.69    4.20
  -3   2  -5   77.39    3.50
  -3   2  -5   80.19    3.60
   3  -2  -5   79.99    4.30
  -2  -3  -5   73.09    3.90
   3  -2  -5   83.89    4.50
  -2  -3  -5   72.89    6.40
   2   3   5   83.59    5.80
  -2  -3   5   81.69    6.00
  -2  -3   5   79.99    4.20
  -2  -3   5   87.69   11.70
   2   3   5   75.99    4.00
   3  -2   5   88.79    8.30
   3   3  -5  199.08    8.80
  -3   3  -5  167.98   17.30
  -3   3  -5  190.88    8.00
  -3  -3  -5  185.08    8.30
   3  -3  -5  204.98    9.00
  -3   3  -5  184.28    8.00
  -3  -3  -5  181.58   12.00
   3   3  -5  189.38   11.20
   3   3   5  186.58    8.40
   3   3   5  187.08   10.90
   3  -3   5  210.38   14.70
  -3  -3   5  187.38   10.60
  -3  -3   5  181.68    8.70
  -3   4  -5   46.40    2.40
  -4  -3  -5   53.79    7.10
   3  -4  -5   39.40    2.50
  -4  -3  -5   42.20    2.40
   4   3  -5   35.40    3.00
   4   3  -5   47.60    5.60
  -3   4  -5   30.90   10.10
   3  -4  -5   45.80    3.20
   3  -4  -5   39.60    2.20
   3  -4   5   39.20    8.00
   4   3   5   43.90    2.50
   4   3   5   49.80    5.00
  -4  -3   5   43.40    4.40
   3  -4   5   40.70    2.10
   2  -4  -5  112.79    5.50
   4   2  -5   92.19    5.50
   4   2  -5  100.79    7.10
   2  -4  -5  106.29    7.10
  -4  -2  -5  106.69    9.40
  -4  -2  -5  107.59    4.90
  -2   4  -5  113.69    4.90
   2  -4   5  113.09   11.80
   2  -4   5  111.89    5.00
   2  -4   5  111.19    9.00
   4   2   5  112.29    5.10
  -4  -2   5  104.09    6.70
  -2   4   5  115.69    5.70
   4   1  -5  286.77   14.10
  -4  -1  -5  301.77   12.40
   1  -4  -5  285.47   13.70
   1  -4  -5  297.17   13.20
  -1   4  -5  292.57   12.60
   4   1  -5  288.07   13.10
  -4  -1  -5  302.87   18.40
  -4  -1   5  305.27   13.80
  -1   4   5  298.87   13.00
   4   1   5  279.47   17.40
   1  -4   5  302.27   16.70
   1  -4   5  279.17   12.60
   4   1   5  294.27   12.50
  -1   4   5  319.37   14.10
   0  -4  -5   17.90    2.80
   0   4  -5   21.40    1.70
  -4   0  -5   19.70    1.20
  -4   0  -5   19.10    1.30
  -4   0  -5   22.90    5.70
   4   0  -5   18.60    2.00
   4   0  -5   17.50    1.90
   0  -4  -5   20.00    1.80
   0  -4   5   15.50    3.50
  -4   0   5   20.20    1.80
   0  -4   5   20.60    1.70
   0   4   5   20.50    2.00
   4   0   5   18.50    4.80
   0  -4   5   15.00    5.60
   0   4   5   18.40    2.50
  -4   1  -5  290.97   12.10
  -1  -4  -5  284.87   12.70
   1   4  -5  298.17   12.80
  -4   1  -5  301.57   12.20
  -4   1  -5  280.87   19.80
   4  -1  -5  293.17   13.10
  -1  -4  -5  306.27   15.30
   1   4   5  250.57   14.10
  -1  -4   5  280.97   21.40
   1   4   5  291.57   12.80
  -1  -4   5  298.47   12.90
   4  -1   5  337.57   17.70
  -1  -4   5  313.57   16.00
   2   4  -5  111.49    5.50
   4  -2  -5  107.99    5.80
  -4   2  -5  104.99    4.50
  -4   2  -5  107.39    4.60
  -2  -4  -5  107.19    5.20
  -4   2  -5  105.09   13.80
  -2  -4  -5  100.89    7.80
  -2  -4   5  117.39    7.90
   2   4   5  114.59    5.40
   4  -2   5  127.39   10.20
   2   4   5  108.49    7.30
  -2  -4   5  119.19   14.80
  -2  -4   5  111.39    5.50
  -3  -4  -5   50.59    6.30
   3   4  -5   44.90    5.70
  -4   3  -5   41.30    1.80
   4  -3  -5   42.50    3.20
   3   4  -5   38.40    2.90
  -4   3  -5   41.60    1.80
  -4   3  -5   34.00    8.70
  -3  -4  -5   44.60    2.60
   3   4   5   49.10    2.80
  -3  -4   5   46.90    5.40
   4  -3   5   49.70    7.80
   3   4   5   45.50    5.30
   4  -4  -5  270.17   11.70
   4  -4  -5  271.27   12.40
   4  -4  -5  269.27   11.60
  -4   4  -5  264.07   11.10
  -4   4  -5  246.38   22.80
   4   4  -5  261.87   12.20
  -4  -4  -5  263.77   11.70
   4   4  -5  261.27   15.20
  -4  -4  -5  276.07   16.60
  -4   4  -5  271.97   11.00
   4   4   5  279.37   15.10
   4   4   5  275.67   11.80
  -4  -4   5  296.57   15.00
   4  -5  -5  148.69    7.80
  -5  -4  -5  148.19    6.80
  -5  -4  -5  144.09   11.70
   5   4  -5  153.48    7.50
  -4   5  -5  123.09   19.30
   4  -5  -5  156.58    7.60
   5   4  -5  130.39   11.20
  -4   5  -5  150.38    6.20
  -5  -4   5  133.89    9.50
   5   4   5  152.48    6.90
   4  -5   5  147.79    6.30
  -3   5  -5  285.37   11.90
   5   3  -5  284.87   15.30
  -5  -3  -5  282.97   12.20
   3  -5  -5  293.87   13.30
   5   3  -5  303.87   13.00
  -5  -3  -5  257.37   17.50
  -3   5   5  275.17   12.80
   3  -5   5  274.77   12.00
  -5  -3   5  286.37   15.00
   5   3   5  283.57   16.10
   5   3   5  287.87   12.20
   3  -5   5  294.47   17.80
   2  -5  -5  290.77   17.90
  -5  -2  -5  313.87   19.20
   5   2  -5  321.47   15.90
  -5  -2  -5  309.67   13.20
  -2   5  -5  314.97   13.20
  -5  -2   5  333.87   15.70
   2  -5   5  322.87   18.50
  -2   5   5  294.97   14.40
   2  -5   5  304.97   13.30
   5   2   5  300.57   17.20
   2  -5   5  351.16   24.20
   5   2   5  322.87   13.30
   1  -5  -5   33.40    3.50
   5   1  -5   44.50    3.20
  -1   5  -5   41.40    2.50
  -5  -1  -5   42.50    2.20
  -5  -1  -5   57.39    8.40
   5   1  -5   39.40    3.80
   1  -5   5   40.30    9.50
  -1   5   5   37.20    2.90
  -5  -1   5   40.00    3.70
   5   1   5   45.20    5.80
   5   1   5   46.00    2.30
   1  -5   5   43.90    6.10
   1  -5   5   41.10    2.50
  -1   5   5   41.00    3.80
  -5   0  -5   50.69    8.40
   5   0  -5   60.79    4.10
  -5   0  -5   67.69    3.00
   5   0  -5   63.69    4.30
  -5   0  -5   71.99    3.00
   0   5  -5   65.09    3.60
   0  -5  -5   61.99    5.20
   0  -5   5   70.29    6.70
   0  -5   5   89.19   13.00
   0  -5   5   63.89    3.60
   5   0   5   69.99    7.20
   0   5   5   66.29    5.10
   0   5   5   64.39    3.80
  -5   0   5   62.89    4.40
   5  -1  -5   43.00    2.70
  -1  -5  -5   41.80    5.00
  -5   1  -5   39.00    8.50
  -5   1  -5   42.50    1.90
   1   5  -5   41.50    2.80
  -5   1  -5   42.70    1.90
   5  -1  -5   47.80    5.00
  -1  -5   5   38.20    5.40
   5  -1   5   49.50    6.70
  -1  -5   5   40.70    2.70
   1   5   5   37.60    4.50
   1   5   5   46.30    2.90
  -5   1   5   49.40    3.60
  -1  -5   5   40.40    9.10
   5  -2  -5  328.27   14.10
   2   5  -5  322.17   13.70
  -2  -5  -5  322.57   17.10
   2   5  -5  285.87   17.40
  -5   2  -5  323.97   23.30
   2   5   5  299.97   16.00
  -2  -5   5  305.97   13.70
  -2  -5   5  322.77   24.60
   2   5   5  305.57   13.60
  -2  -5   5  303.97   16.80
   3   5  -5  262.87   12.70
   5  -3  -5  308.17   13.20
   5  -3  -5  296.47   12.00
  -5   3  -5  274.37   23.00
   5  -3  -5  285.07   12.00
  -3  -5  -5  272.27   16.50
   3   5  -5  275.47   16.50
   3   5   5  294.07   12.60
  -3  -5   5  297.77   16.00
   3   5   5  288.57   15.70
   5  -4  -5  164.18    7.60
   5  -4  -5  149.59    7.50
  -5   4  -5  145.79   20.20
   4   5  -5  169.08    7.70
  -4  -5  -5  157.28   11.60
   5  -4  -5  150.88    7.80
   4   5  -5  154.48   11.20
  -4  -5   5  143.99   10.40
   4   5   5  156.68    7.20
   4   5   5  125.69    9.80
   5  -5  -5    1.20    1.60
  -5   5  -5   -1.90    5.20
   5   5  -5   -0.10    2.40
  -5  -5  -5    1.10    2.60
   5   5  -5    2.20    1.50
   5  -5  -5    1.80    1.60
  -5  -5   5    0.20    2.40
   5   5   5    1.70    1.10
  -5   6  -5    5.80    6.70
   5  -6  -5   18.10    3.80
  -5   6  -5   18.70    1.00
   5  -6  -5   18.20    2.60
   6   5  -5   21.50    2.60
   5  -6  -5   27.00    3.60
  -6  -5  -5   21.10    5.70
  -6  -5   5   21.20    4.50
   6   5   5   22.90    2.10
   5  -6   5   18.90    1.00
   5  -6   5   27.50    6.50
   6   4  -5    1.40    2.60
   4  -6  -5    4.60    2.10
   4  -6  -5    7.50    1.90
   6   4  -5    6.30    1.70
  -6  -4  -5    0.80    3.60
  -4   6  -5    4.60    0.80
  -6  -4  -5    4.50    1.00
   4  -6  -5    4.60    3.00
   4  -6   5    4.70    0.80
   6   4   5    5.30    1.10
   4  -6   5    5.10    3.80
  -6  -4   5    3.40    2.90
  -4   6   5    3.60    1.60
   6   3  -5  940.61   44.30
   3  -6  -5  996.90   46.80
   6   3  -5  988.90   41.60
  -6  -3  -5  990.90   51.69
  -6  -3  -5  966.60   40.80
   3  -6  -5 1011.30   42.90
  -3   6  -5  994.40   40.50
   3  -6   5 1007.80   47.50
  -6  -3   5 1042.30   44.30
  -3   6   5  975.80   41.50
   6   3   5  987.10   40.80
   3  -6   5  995.20   40.70
   2  -6  -5   64.19    9.70
   6   2  -5   68.09    5.90
   6   2  -5   75.29    4.60
  -6  -2  -5   63.19    9.30
  -2   6  -5   68.59    3.50
   2  -6  -5   74.99    5.60
  -6  -2  -5   72.49    3.50
  -2   6   5   69.19    4.30
   6   2   5   75.69    3.60
   2  -6   5   60.09    8.50
   2  -6   5   74.09    3.70
  -6  -2   5   71.59    5.90
  -6  -1  -5   17.90    5.60
  -6  -1  -5   33.20    1.80
   6   1  -5   28.90    2.80
  -1   6  -5   29.60    2.10
   6   1  -5   35.70    4.00
   1  -6  -5   28.60    4.00
  -1   6   5   35.60    4.20
  -1   6   5   24.40    2.40
  -6  -1   5   30.10    3.90
   1  -6   5   39.40    6.40
   6   1   5   29.60    1.80
   1  -6   5   26.60    2.10
  -6   0  -5  116.59    5.00
   0   6  -5  108.69    5.50
   6   0  -5  116.99    6.90
   6   0  -5  108.79    6.10
  -6   0  -5  103.09   13.10
  -6   0  -5  114.89    5.00
   0  -6  -5  105.49    7.70
   0   6   5  125.59    7.90
  -6   0   5  111.89    7.30
   0  -6   5  136.49   10.00
   0   6   5  120.19    6.00
   0  -6   5  119.19    5.70
   1   6  -5   29.80    2.40
   6  -1  -5   38.20    4.80
  -6   1  -5   28.80    7.10
   6  -1  -5   23.50    2.70
  -1  -6  -5   43.30    5.30
  -6   1   5   37.40    4.40
  -1  -6   5   25.10    4.80
   1   6   5   35.30    2.70
  -1  -6   5   32.40    2.50
  -1  -6   5   41.90   12.20
   1   6   5   34.20    4.50
   2   6  -5   73.09    4.20
  -6   2  -5   48.30   10.50
  -2  -6  -5   79.29    7.30
   6  -2  -5   78.39    4.60
   6  -2  -5   72.49    4.60
   2   6  -5   63.49    9.60
  -2  -6   5   71.99    7.10
   2   6   5   74.39    8.60
  -2  -6   5   60.99   13.30
  -6   2   5   83.59    7.00
   2   6   5   76.39    4.50
   6  -3  -5  986.50   40.90
  -6   3  -5  912.71   53.19
   6  -3  -5 1056.79   41.00
   6  -3  -5  910.91   41.10
   3   6  -5  934.41   40.60
  -3  -6  -5 1023.10   45.50
   3   6   5  959.20   43.90
  -3  -6   5  994.80   44.80
   3   6   5  949.71   40.70
   6  -4  -5    9.00    1.80
  -4  -6  -5    6.00    3.50
   6  -4  -5    4.10    1.80
  -6   4  -5    6.80    6.80
   4   6  -5    3.90    1.50
  -4  -6   5    6.90    3.50
   4   6   5    4.30    1.30
   6  -5  -5   16.20    2.60
  -6   5  -5    4.30    6.80
   6  -5  -5   20.80    3.20
   5   6  -5   23.70    2.60
   6  -5  -5   21.40    3.20
  -5  -6  -5   26.40    6.00
  -5  -6   5   15.00    4.50
   5   6   5   19.80    2.10
   6  -6  -5  134.89    8.50
  -6   6  -5  108.19   18.70
   6   6  -5  124.39    7.00
   6  -6  -5  123.49    9.00
   6  -6  -5  134.59    7.30
  -6  -6  -5  129.39   12.00
  -6  -6   5  144.09   10.90
   6   6   5  126.59    6.40
   6  -7  -5    8.60    3.10
  -7  -6  -5    5.60    4.70
   6  -7  -5    6.00    3.90
  -6   7  -5    2.40    9.10
   7   6  -5    5.20    2.10
   6  -7  -5    6.00    2.10
   7   6   5    8.20    1.70
   6  -7   5   15.10    6.10
  -7  -6   5    9.80    4.00
   5  -7  -5   54.39    7.30
  -7  -5  -5   54.99    9.30
   5  -7  -5   63.89    5.80
   5  -7  -5   55.39    4.40
  -5   7  -5   57.49    2.70
   7   5  -5   56.09    4.20
   5  -7   5   52.99    8.80
   5  -7   5   55.59    3.00
  -7  -5   5   58.09    7.40
   7   5   5   59.19    3.50
   4  -7  -5  187.08   11.00
  -4   7  -5  176.18    7.90
   7   4  -5  178.58   12.30
   4  -7  -5  184.68   14.10
   7   4  -5  189.58    9.30
  -7  -4  -5  178.68    8.30
  -7  -4  -5  196.28   15.50
   4  -7   5  182.98    8.10
  -4   7   5  184.58    9.20
   7   4   5  199.88    8.40
   4  -7   5  190.98   15.00
  -7  -4   5  182.68   12.20
  -7  -3  -5   45.30    2.60
   7   3  -5   45.90    3.70
   3  -7  -5   38.90    7.40
   3  -7  -5   49.80    5.60
   7   3  -5   41.60    5.80
  -7  -3  -5   39.90    8.10
  -3   7  -5   45.30    2.50
   3  -7   5   47.20    7.60
   3  -7   5   45.40    2.70
  -7  -3   5   42.20    5.60
   7   3   5   46.70    2.70
  -3   7   5   49.20    3.60
   7   2  -5  121.49    8.50
   2  -7  -5  116.29   14.20
  -7  -2  -5  123.29   12.20
   7   2  -5  115.09    6.50
  -7  -2  -5  117.49    5.40
   2  -7  -5  109.09    8.10
  -2   7  -5  120.49    5.50
   7   2   5  114.19    5.40
   2  -7   5  121.69    5.70
  -7  -2   5  110.29    8.30
  -2   7   5  123.09    6.40
   2  -7   5  141.99   11.30
   7   1  -5  242.28   11.40
  -1   7  -5  253.87   10.60
   1  -7  -5  244.08   13.60
  -7  -1  -5  250.67   10.20
  -7  -1  -5  207.68   17.40
   7   1  -5  209.48   12.80
  -7  -1   5  233.28   13.40
   7   1   5  245.08   10.20
  -1   7   5  252.67   13.60
   1  -7   5  248.58   16.20
   1  -7   5  229.38   10.70
  -1   7   5  245.48   11.10
   0   7  -5   18.60    2.00
   7   0  -5   20.50    2.70
   0  -7  -5   29.80    4.70
   7   0  -5   28.50    3.70
  -7   0  -5   25.20    1.30
  -7   0  -5   29.50    7.20
   7   0   5   24.60    1.30
  -7   0   5   27.60    4.20
   0   7   5   26.30    2.50
   0  -7   5   23.50    2.20
   0  -7   5   26.50    5.20
   0   7   5   18.90    3.40
   7  -1  -5  242.68   12.40
   1   7  -5  258.07   10.90
  -7   1  -5  246.78   19.50
  -1  -7  -5  225.48   14.20
   7  -1  -5  242.18   11.50
   1   7   5  225.98   13.70
  -7   1   5  256.17   14.20
   1   7   5  242.98   11.10
  -1  -7   5  217.28   15.20
  -7   2  -5  105.99   15.30
   7  -2  -5  120.39    6.60
  -2  -7  -5  114.69    9.50
   2   7  -5  103.09    6.60
   7  -2  -5  127.09    7.10
  -2  -7   5  117.59   10.10
   2   7   5  122.29    9.00
  -7   2   5  115.29    9.50
   2   7   5  117.09    6.00
  -3  -7  -5   45.20    7.00
  -7   3  -5   53.99   12.20
   7  -3  -5   44.40    3.90
   7  -3  -5   51.39    3.90
   3   7  -5   48.60    3.40
   3   7   5   41.60    3.20
  -3  -7   5   39.10    6.40
  -7   3   5   42.50    7.30
   7  -4  -5  173.48   10.30
  -4  -7  -5  197.68   13.90
   7  -4  -5  173.68    9.90
   7  -4  -5  187.38    9.50
  -7   4  -5  197.58   24.40
   4   7  -5  191.98    9.00
   4   7   5  182.58    8.70
  -4  -7   5  202.68   13.60
   7  -5  -5   58.99    5.40
  -5  -7  -5   54.99    8.70
   7  -5  -5   56.99    5.30
   5   7  -5   61.99    4.30
  -7   5  -5   43.40   12.40
   7  -5  -5   62.09    4.60
  -5  -7   5   53.99    8.00
   5   7   5   62.69    3.90
  -7   6  -5   -6.40    6.20
   7  -6  -5    5.30    2.10
  -6  -7  -5   -0.40    2.90
   6   7  -5    2.90    1.80
   7  -6  -5    4.00    2.40
   7  -6  -5    6.70    3.00
  -6  -7   5    8.80    4.10
   6   7   5    5.20    1.50
   7   7  -5  198.88    9.80
   7  -7  -5  203.98   10.10
  -7  -7  -5  188.58   16.00
   7  -7  -5  183.48   12.00
   7  -7  -5  183.98   12.90
  -7   7  -5  184.18   28.50
   7   7   5  189.98    9.20
  -7  -7   5  204.28   14.50
   7  -8  -5    6.90    4.90
   7  -8  -5   16.20    4.10
  -8  -7  -5   18.70    6.60
   8   7  -5    7.80    2.30
   7  -8  -5   18.10    3.00
   7  -8   5   15.00    6.20
  -8  -7   5   12.00    5.10
   8   7   5   13.80    2.10
   8   6  -5  180.08    9.20
  -8  -6  -5  175.68   15.80
   6  -8  -5  191.18    9.40
   6  -8  -5  157.08   15.20
   6  -8  -5  190.98   11.90
  -6   8  -5  171.28    7.30
  -8  -6   5  166.58   13.10
   6  -8   5  170.48    7.50
   6  -8   5  177.58   15.80
   8   6   5  172.88    8.30
   5  -8  -5   96.79    8.30
  -8  -5  -5  123.29   12.80
  -5   8  -5  107.79    4.80
   8   5  -5  114.19    6.50
   5  -8  -5   93.99   11.00
  -5   8   5  124.39    6.60
   5  -8   5  101.19    5.00
  -8  -5   5  109.89    9.80
   5  -8   5  122.09   12.60
   4  -8  -5   24.70    4.50
  -8  -4  -5   22.90    2.00
  -4   8  -5   22.20    1.70
   8   4  -5   18.10    2.70
   4  -8  -5   38.30    7.50
  -8  -4  -5   18.50    6.40
   8   4   5   25.20    2.10
  -4   8   5   19.30    2.70
  -8  -4   5   24.10    5.10
   4  -8   5   23.80    1.90
   4  -8   5   15.70    6.10
  -8  -3  -5   11.70    5.50
   8   3  -5   12.00    3.70
  -3   8  -5   12.40    1.40
  -8  -3  -5   11.40    1.70
   3  -8  -5   12.70    3.70
   8   3  -5   10.20    2.30
   3  -8  -5   17.30    7.20
   3  -8   5    7.40    4.50
   8   3   5   12.50    1.40
   3  -8   5   13.80    1.50
  -3   8   5    9.40    2.00
  -8  -3   5   15.20    4.10
   8   2  -5    3.50    1.70
  -2   8  -5    0.90    0.90
   8   2  -5    3.20    2.70
   2  -8  -5   -3.50    6.40
  -8  -2  -5    2.10    3.80
  -8  -2  -5    0.40    0.70
   2  -8  -5   -0.40    2.40
   2  -8   5    2.10    1.10
   2  -8   5   -1.60    3.20
  -8  -2   5   -2.90    2.40
  -2   8   5   -0.50    1.40
   8   2   5    0.30    0.70
  -1   8  -5  131.99    6.10
  -8  -1  -5  117.79   14.90
  -8  -1  -5  122.29    5.60
   8   1  -5  134.59    8.90
   1  -8  -5  133.69    9.60
   8   1  -5  127.49    7.00
   8   1   5  123.69    5.50
  -1   8   5  131.09    6.70
   1  -8   5  113.99    6.20
  -1   8   5  128.49    9.30
   1  -8   5  131.89   11.50
  -8  -1   5  133.79    9.60
   0   8  -5  274.37   12.40
   0  -8  -5  277.97   16.30
   8   0  -5  271.77   13.20
  -8   0  -5  291.77   11.60
   8   0  -5  289.97   15.10
  -8   0  -5  271.67   21.40
   8   0   5  276.17   11.60
   0   8   5  292.67   12.90
   0  -8   5  292.17   18.30
  -8   0   5  283.27   16.20
   0   8   5  274.57   16.00
   8  -1  -5  135.89    7.10
  -1  -8  -5  134.69   10.10
  -8   1  -5  117.99   16.40
   1   8  -5  127.89    6.40
   8  -1  -5  129.39    8.30
   1   8   5  118.19    9.40
   1   8   5  116.59    6.50
  -8   1   5  126.29   10.00
  -1  -8   5  131.59   11.20
   8  -2  -5    1.90    1.70
  -2  -8  -5   -1.10    2.70
   8  -2  -5    3.10    1.80
   2   8  -5    2.20    1.40
  -8   2  -5   -6.00    4.20
   2   8   5    1.00    1.30
  -8   2   5    2.40    3.50
  -2  -8   5    0.30    3.10
   3   8  -5   14.70    2.20
   8  -3  -5    9.90    2.30
  -8   3  -5    5.60    6.00
   8  -3  -5    9.40    2.70
  -3  -8  -5    6.10    3.90
   3   8   5   14.10    2.10
  -8   3   5   13.80    5.30
  -3  -8   5   20.70    5.30
   4   8  -5   24.20    2.70
  -4  -8  -5   23.00    5.80
   8  -4  -5   17.90    3.10
   8  -4  -5   28.20    4.30
  -8   4  -5   26.80   10.90
   8  -4  -5   20.50    3.00
   4   8   5   27.40    2.70
  -4  -8   5   26.20    5.80
  -5  -8  -5  108.69   10.90
   8  -5  -5   98.29    7.90
   8  -5  -5  102.49    7.70
   5   8  -5  110.09    6.10
   8  -5  -5  106.19    6.50
  -8   5  -5   80.99   17.80
   5   8   5  104.99    5.70
  -5  -8   5   96.19   11.20
   8  -6  -5  195.38    9.60
  -8   6  -5  161.98   25.40
   8  -6  -5  168.08   11.40
   6   8  -5  164.08    8.80
   8  -6  -5  165.58   11.20
  -6  -8  -5  172.68   15.00
   6   8   5  183.28    8.60
  -6  -8   5  158.08   13.00
  -8   7  -5    0.00    7.70
   8  -7  -5   14.40    4.00
  -7  -8  -5   11.30    5.90
   7   8  -5    5.80    2.20
   8  -7  -5    5.70    4.10
   8  -7  -5    8.10    2.40
  -7  -8   5   10.40    5.20
   7   8   5   13.20    2.10
   8  -8  -5   -0.40    4.80
  -8   8  -5    9.30    9.70
   8  -8  -5    1.10    3.10
   8   8  -5    2.20    2.00
  -8  -8  -5   -5.40    4.60
   8  -8  -5   -0.10    2.00
  -8  -8   5   -4.00    3.50
   8  -8   5    2.00    5.30
   8   8   5    0.20    1.40
   8  -9  -5    0.00    3.30
  -9  -8  -5    4.80    6.10
   8  -9  -5    1.10    2.70
   9   8  -5   -1.80    1.90
   9   8   5    2.80    1.70
  -9  -8   5    0.60    4.20
   8  -9   5    8.80    5.30
   7  -9  -5   16.50    2.90
   9   7  -5    7.50    2.80
  -9  -7  -5   10.80    5.70
   7  -9  -5    9.70    3.90
   9   7   5   11.40    2.00
  -9  -7   5   13.30    4.80
   7  -9   5   10.80    6.40
  -6   9  -5  229.28    9.50
   9   6  -5  209.38   11.20
   6  -9  -5  250.37   11.60
   6  -9  -5  217.48   14.40
  -9  -6  -5  216.98   19.00
   6  -9  -5  201.68   17.30
   6  -9   5  217.58    9.70
  -9  -6   5  225.98   16.00
   6  -9   5  244.78   19.00
   9   6   5  222.68   10.30
  -9  -5  -5   74.49   12.10
   5  -9  -5   60.29    7.50
   5  -9  -5   89.29   12.20
  -5   9  -5   72.59    3.60
   9   5  -5   69.59    5.10
   5  -9   5   87.49   12.50
  -5   9   5   71.79    5.10
  -9  -5   5   78.19    9.60
   9   5   5   77.39    4.20
   5  -9   5   71.99    3.80
   9   4  -5   -0.60    1.70
  -4   9  -5    3.40    1.00
   4  -9  -5    2.60    2.80
  -9  -4  -5   -0.60    4.50
   4  -9  -5    5.60    7.10
   4  -9   5    6.20    5.20
  -9  -4   5    3.40    3.60
   4  -9   5    2.70    1.10
   9   4   5    3.60    1.20
  -4   9   5    2.10    1.80
  -3   9  -5   88.99    4.30
  -9  -3  -5   86.69   13.50
   3  -9  -5   93.79   14.60
  -9  -3  -5   85.79    4.30
   9   3  -5   81.89    5.40
   3  -9  -5   88.59    8.50
   9   3   5   83.69    4.30
   3  -9   5   86.59   11.60
  -9  -3   5   88.19    8.90
   3  -9   5   78.99    4.50
  -3   9   5   76.89    5.20
   2  -9  -5    4.50    8.20
   2  -9  -5    9.50    3.50
  -9  -2  -5   10.30    5.70
  -2   9  -5   10.80    1.50
   9   2  -5   10.30    2.30
   9   2  -5    1.60    2.90
  -9  -2  -5   10.40    1.20
   9   2   5    8.80    1.20
   2  -9   5   13.90    1.80
  -2   9   5    8.40    1.90
   2  -9   5    9.30    5.10
  -9  -2   5   19.90    5.10
   9   1  -5    5.70    2.10
   9   1  -5    2.20    2.60
  -1   9  -5    3.40    1.30
  -9  -1  -5    4.60    0.80
   1  -9  -5    6.60    3.20
  -9  -1  -5   -3.40    4.30
  -1   9   5   10.40    3.60
   9   1   5    5.70    0.80
  -1   9   5    5.40    1.80
  -9  -1   5    4.60    3.50
   1  -9   5    9.10    4.30
   0   9  -5  441.76   18.30
   9   0  -5  454.05   19.20
   0  -9  -5  418.76   22.90
   9   0  -5  413.06   21.60
  -9   0  -5  368.86   28.10
   0  -9   5  443.26   25.00
   9   0   5  405.26   17.20
  -9   0   5  446.16   23.30
   0   9   5  408.46   18.60
  -1  -9  -5    2.40    3.80
   9  -1  -5    6.00    2.10
   1   9  -5    7.80    1.70
  -9   1  -5    7.40    6.20
   9  -1  -5    6.50    2.70
  -9   1   5    7.40    4.20
   1   9   5    5.60    1.80
  -1  -9   5    4.80    4.30
   2   9  -5   10.80    2.00
  -9   2  -5    2.70    6.30
   9  -2  -5   13.60    3.30
  -2  -9  -5   20.60    5.10
   9  -2  -5    9.50    2.40
   2   9   5    8.50    2.00
  -2  -9   5   13.70    5.20
  -9   2   5    3.30    4.30
  -9   3  -5   47.80   12.00
   9  -3  -5   70.69    6.40
  -3  -9  -5   86.89   10.30
   3   9  -5   80.49    4.80
   9  -3  -5   83.09    5.50
  -9   3   5   81.89   11.40
   3   9   5   77.89    4.80
  -3  -9   5  101.59   10.00
  -4  -9  -5    2.40    3.90
   4   9  -5    1.80    1.60
   9  -4  -5    0.80    2.60
   9  -4  -5   -1.30    1.90
  -9   4  -5    0.90    6.90
  -9   4   5   -0.20    5.40
   4   9   5    3.30    1.70
  -4  -9   5    0.20    3.70
   5   9  -5   77.19    5.10
  -5  -9  -5   95.49   11.70
  -9   5  -5   58.29   15.20
   9  -5  -5   76.79    5.50
   9  -5  -5   64.69    7.20
   9  -5  -5   67.29    7.60
   5   9   5   73.59    4.70
  -5  -9   5   81.59   10.30
   9  -6  -5  241.78   12.00
  -9   6  -5  217.58   30.20
   9  -6  -5  215.38   14.20
   6   9  -5  243.88   11.50
  -6  -9  -5  205.38   17.40
   9  -6  -5  230.38   14.40
  -6  -9   5  234.48   16.90
   6   9   5  242.08   11.10
   7   9  -5   18.60    2.90
   9  -7  -5   10.10    4.00
   9  -7  -5   13.60    5.20
  -7  -9  -5   14.00    6.50
  -9   7  -5   10.80    9.50
   9  -7  -5   11.60    2.90
  -7  -9   5   14.10    5.80
   7   9   5    8.90    2.10
   9  -8  -5   -6.00    2.90
   8   9  -5    1.00    2.20
  -9   8  -5    0.80   11.90
  -8  -9  -5    3.10    4.80
   8   9   5    2.00    1.70
  -8  -9   5   -0.10    4.40
   9   9  -5   49.40    4.80
  -9  -9  -5   44.10   10.70
   9  -9  -5   42.50    7.20
   9  -9  -5   57.09    5.20
   9  -9   5   47.30    9.80
   9   9   5   42.10    3.90
  -9  -9   5   66.49   10.20
  10   9  -5    2.90    2.40
 -10  -9  -5    7.00    7.10
   9 -10  -5    7.50    4.70
   9 -10  -5   -1.40    2.30
   9 -10   5   -3.40    5.70
 -10  -9   5    4.90    6.40
 -10  -8  -5   20.70    8.20
   8 -10  -5   23.70    3.60
  10   8  -5   16.50    3.10
   8 -10  -5   14.50    5.20
 -10  -8   5   21.70    7.00
   8 -10   5   18.30    7.10
  10   8   5   19.60    2.70
 -10  -7  -5   62.29   12.10
  10   7  -5   69.09    5.40
   7 -10  -5   63.69    8.20
   7 -10  -5   61.89    5.70
   7 -10   5   65.09    3.30
   7 -10   5   80.19   12.90
  10   7   5   65.69    4.40
 -10  -7   5   66.69   10.20
  -6  10  -5   33.10    2.10
 -10  -6  -5   25.90    8.40
   6 -10  -5   25.30    4.10
   6 -10  -5   35.40    8.60
  10   6  -5   24.40    3.40
  -6  10   5   29.20    3.60
  10   6   5   35.70    3.00
   6 -10   5   27.90   10.60
 -10  -6   5   27.60    6.90
   6 -10   5   27.70    2.30
  -5  10  -5   11.50    1.40
   5 -10  -5   10.50    4.30
 -10  -5  -5   -1.30    4.80
  10   5  -5   12.10    2.70
 -10  -5   5   10.70    5.10
  10   5   5   10.10    1.80
   5 -10   5   16.40    6.60
  -5  10   5   11.60    2.50
 -10  -4  -5  141.19   17.60
  -4  10  -5  166.18    7.60
   4 -10  -5  183.18   12.50
  10   4  -5  181.28    9.30
   4 -10   5  154.38    7.80
 -10  -4   5  159.58   13.20
  -4  10   5  172.88    8.90
  10   4   5  171.88    7.80
   4 -10   5  169.98   15.20
 -10  -3  -5    4.00    1.20
  -3  10  -5    7.10    1.30
   3 -10  -5    4.40    3.80
  10   3  -5    3.10    2.10
 -10  -3  -5    6.60    5.30
  10   3   5    6.80    1.30
 -10  -3   5    9.90    4.50
  -3  10   5    5.70    2.10
   3 -10   5    8.50    5.60
   2 -10  -5  115.39   11.90
 -10  -2  -5  111.19    5.20
  -2  10  -5  112.79    5.90
 -10  -2  -5   95.79   14.30
  10   2  -5   96.99    6.60
 -10  -2   5   95.69    9.90
  -2  10   5  109.49    6.40
   2 -10   5  108.79   13.30
  10   2   5  117.09    5.10
  -1  10  -5   96.59    4.80
   1 -10  -5   78.99    9.30
  10   1  -5   88.59    5.80
 -10  -1  -5   85.89    4.00
 -10  -1  -5   85.29   14.10
  -1  10   5   79.99    5.30
  10   1   5   87.09    4.00
   1 -10   5   75.39   10.70
 -10  -1   5   87.19    9.90
   0 -10  -5   47.40    7.30
 -10   0  -5   41.20    9.90
  10   0  -5   44.50    4.30
   0  10  -5   51.59    3.50
  10   0  -5   54.49    7.00
   0  10   5   52.49    4.00
   0 -10   5   48.60    8.40
 -10   0   5   45.00    7.50
   1  10  -5   89.59    5.10
  -1 -10  -5   95.49   10.80
  10  -1  -5   83.89    5.90
 -10   1  -5   74.59   14.30
  10  -1  -5   79.99    7.90
  -1 -10   5   86.69   10.90
   1  10   5   90.89    5.50
 -10   1   5  101.79   10.20
  -2 -10  -5  104.59   10.60
 -10   2  -5  110.19   18.10
  10  -2  -5  120.09    8.90
  10  -2  -5  115.79    6.90
   2  10  -5  117.59    6.20
  -2 -10   5  112.19   11.40
   2  10   5  108.69    6.40
 -10   2   5  119.29   13.90
  10  -3  -5    6.40    3.40
  -3 -10  -5    5.10    4.40
  10  -3  -5    7.00    2.20
 -10   3  -5   -1.50    5.80
   3  10  -5    3.10    1.70
  -3 -10   5    2.70    3.80
 -10   3   5    6.70    6.40
   3  10   5    5.10    1.80
  -4 -10  -5  163.38   13.90
  10  -4  -5  182.18    9.30
  10  -4  -5  137.89   10.80
 -10   4  -5  176.48   24.70
   4  10  -5  161.78    8.40
 -10   4   5  155.78   18.50
  -4 -10   5  168.98   14.30
   4  10   5  169.08    8.40
  10  -5  -5   16.40    4.30
   5  10  -5   11.90    2.40
 -10   5  -5    9.60    9.50
  10  -5  -5    5.90    3.20
  -5 -10  -5   10.00    5.60
  10  -5  -5    7.00    2.60
   5  10   5    8.40    2.20
  -5 -10   5   11.70    6.00
  10  -6  -5   29.70    5.90
   6  10  -5   28.20    3.40
  -6 -10  -5   31.70    7.80
  10  -6  -5   25.80    5.30
 -10   6  -5   15.10   12.50
  10  -6  -5   29.50    3.90
  -6 -10   5   26.70    7.10
   6  10   5   29.40    3.30
  -7 -10  -5   78.59   12.60
   7  10  -5   70.19    5.30
  10  -7  -5   71.19    8.80
 -10   7  -5   55.39   16.40
  10  -7  -5   58.59    6.50
  -7 -10   5   84.69   11.10
   7  10   5   65.79    4.80
   8  10  -5   19.50    3.30
  10  -8  -5   22.90    3.90
  -8 -10  -5   19.50    8.40
  10  -8  -5   24.90    5.90
 -10   8  -5   22.30   12.60
   8  10   5   24.60    3.60
  -8 -10   5   24.10   12.60
  10  -9  -5   -0.90    2.60
   9  10  -5   -3.50    2.40
  10  -9  -5    7.70    5.00
  -9 -10  -5   -0.50    6.60
  10  -9   5    4.90    6.90
   9  10   5    0.70    2.10
  -9 -10   5    5.80    5.60
 -10 -10  -5   96.19   15.70
  10 -10  -5   76.09    6.70
  10  10  -5   75.99    6.20
  10 -10  -5   63.99    9.70
  10 -10   5  112.99   16.20
  10  10   5   81.49    5.50
 -10 -10   5   71.69   11.80
  10 -11  -5   -0.30    4.70
  11  10  -5    0.40    2.70
 -11 -10  -5   -3.50    7.60
  10 -11  -5    0.20    2.80
  11  10   5   -0.70    2.00
 -11 -10   5    3.40    6.50
  10 -11   5    0.40    7.10
  11   9  -5   55.99    5.40
 -11  -9  -5   73.89   14.20
   9 -11  -5   48.80    8.80
   9 -11  -5   60.49    5.60
   9 -11   5   67.79   12.90
  11   9   5   60.39    4.60
   8 -11  -5   23.80    3.70
  11   8  -5   31.40    4.00
   8 -11  -5   33.70    7.20
 -11  -8  -5   19.30    8.90
  11   8   5   26.90    3.10
   8 -11   5   29.80    9.00
 -11  -8   5   26.40    7.70
   7 -11  -5   10.50    4.90
  -7  11  -5    8.50    1.10
 -11  -7  -5   14.80    7.10
  11   7  -5    4.50    2.60
   7 -11  -5    7.50    2.80
   7 -11   5   -5.20    5.50
 -11  -7   5   17.30    6.30
  11   7   5    5.20    1.80
   6 -11  -5    1.80    4.20
  11   6  -5    2.80    2.30
  -6  11  -5    1.60    1.00
 -11  -6  -5   -3.10    6.00
  11   6   5    1.30    1.50
   6 -11   5   -6.10    4.40
 -11  -6   5   -0.50    4.80
  -6  11   5    3.10    2.40
  -5  11  -5   -0.90    0.90
   5 -11  -5   -0.70    3.70
 -11  -5  -5   -3.50    5.60
  11   5  -5   -0.10    2.20
  -5  11   5    0.10    2.00
   5 -11   5    1.60    5.10
   5 -11   5   -0.80    1.50
 -11  -5   5    1.40    4.00
  11   5   5    0.10    1.30
  11   4  -5    8.60    3.30
 -11  -4  -5   12.20    7.20
   4 -11  -5    9.30    4.70
  -4  11  -5   12.80    1.70
  -4  11   5    6.80    3.10
 -11  -4   5   17.40    6.10
 -11  -3  -5  170.98   20.20
  11   3  -5  147.29    8.70
 -11  -3  -5  158.78    7.30
   3 -11  -5  159.38   12.90
  -3  11  -5  159.78    7.40
   3 -11   5  160.58   15.20
  11   3   5  157.58    7.20
 -11  -3   5  141.89   12.80
  -3  11   5  152.88    8.50
 -11  -2  -5   47.70   11.40
  -2  11  -5   42.00    3.10
   2 -11  -5   53.79    8.40
  11   2  -5   43.30    4.40
 -11  -2  -5   41.70    2.60
  -2  11   5   45.30    4.10
  11   2   5   43.60    2.60
   2 -11   5   33.60    8.20
 -11  -2   5   33.80    7.10
   1 -11  -5    1.50    4.10
 -11  -1  -5    1.40    5.00
  -1  11  -5    0.70    1.30
  11   1  -5   -0.30    2.10
 -11  -1  -5   -0.60    0.70
  11   1   5    0.80    0.70
 -11  -1   5    5.40    4.10
   1 -11   5    3.50    4.50
  -1  11   5    0.30    1.80
  11   0  -5    2.80    2.30
 -11   0  -5   -2.40    6.60
   0  11  -5    1.60    1.50
   0 -11  -5    2.30    4.00
   0  11   5    0.90    1.90
 -11   0   5    4.60    4.80
   0 -11   5   -3.30    3.80
  11  -1  -5   -1.90    2.00
  -1 -11  -5   -2.40    3.90
   1  11  -5    1.80    1.50
 -11   1  -5   -1.10    6.30
 -11   1   5   -4.60    4.00
  -1 -11   5    6.00    4.40
   1  11   5   -2.70    1.60
  -2 -11  -5   44.20    8.10
 -11   2  -5   45.30   12.30
   2  11  -5   47.80    3.70
  11  -2  -5   48.30    4.80
   2  11   5   38.10    3.80
 -11   2   5   33.50    8.00
  -2 -11   5   44.90    8.20
  -3 -11  -5  157.18   14.20
 -11   3  -5  132.79   21.50
   3  11  -5  159.78    8.20
  11  -3  -5  145.19    8.90
   3  11   5  170.08    8.50
  -3 -11   5  167.68   14.50
 -11   3   5  180.68   16.50
  11  -4  -5   12.00    2.70
  -4 -11  -5    8.80    5.10
   4  11  -5   12.90    2.40
 -11   4  -5    7.20    9.00
 -11   4   5   13.30    8.20
  -4 -11   5    4.80    4.10
   4  11   5   11.50    2.40
   5  11  -5   -0.40    2.10
  11  -5  -5    1.80    4.10
  -5 -11  -5    1.00    4.90
   5  11   5   -4.10    2.00
 -11   5   5    3.50    8.10
  -5 -11   5   -3.60    4.40
  11  -6  -5   -2.60    4.70
  -6 -11  -5   -1.10    5.30
   6  11  -5    1.90    2.20
 -11   6  -5   -0.50   11.00
  11  -6  -5   -3.10    2.30
   6  11   5   -0.70    1.90
  11  -7  -5    3.60    3.90
   7  11  -5   11.00    2.90
  11  -7  -5    7.10    2.90
  -7 -11  -5    5.00    6.00
 -11   7  -5   13.80   11.90
   7  11   5    3.80    2.20
  -7 -11   5   13.50    5.10
  11  -8  -5   24.10    4.10
   8  11  -5   30.20    3.80
  11  -8  -5   23.70    6.10
 -11   8  -5   34.30   17.20
  -8 -11  -5   44.50   10.40
   8  11   5   27.70    3.50
  -8 -11   5   36.60    8.30
   9  11  -5   65.59    5.50
 -11   9  -5   39.20   19.00
  11  -9  -5   66.69    6.20
  -9 -11  -5   53.09   11.80
  11  -9  -5   57.69    8.60
   9  11   5   59.69    4.90
  -9 -11   5   46.30   10.40
  11  -9   5   58.19   12.50
  10  11  -5   -0.10    2.50
  11 -10  -5   -0.80    5.00
  11 -10  -5    1.80    2.90
 -10 -11  -5   -4.90    7.20
 -10 -11   5    7.50    6.70
  11 -10   5    5.80    6.80
  10  11   5   -1.70    2.00
 -11 -11  -5   -1.40    8.20
  11 -11  -5   -4.20    5.00
  11 -11  -5   -1.10    3.00
  11  11  -5    1.30    2.70
  11  11   5    0.40    2.40
  11 -11   5   -9.50    6.80
 -11 -11   5    3.20    7.20
  10 -12  -5    1.40    2.80
  10 -12  -5   -6.60    5.50
  12  10  -5    1.40    2.90
  12  10   5    0.30    2.00
  10 -12   5    2.80    7.80
 -12 -10   5   -2.00    6.50
   9 -12  -5   17.70    3.60
  12   9  -5   16.80    3.60
 -12  -9  -5   17.60    9.30
   9 -12  -5   13.30    6.00
 -12  -9   5   16.60    8.30
   9 -12   5   19.20    8.80
  12   9   5   16.20    2.70
 -12  -8  -5   35.80   11.10
   8 -12  -5   29.80    7.00
   8 -12  -5   31.10    4.30
  12   8  -5   28.40    4.30
   8 -12   5   31.50   10.50
  12   8   5   29.20    3.70
 -12  -8   5   21.70    7.40
  12   7  -5    2.20    2.50
   7 -12  -5    0.10    2.40
  -7  12  -5    1.20    1.00
 -12  -7  -5    1.30    7.10
   7 -12  -5    7.80    5.00
   7 -12   5    0.20    6.50
 -12  -7   5    6.00    5.60
  12   7   5   -0.20    1.70
  -6  12  -5   29.80    2.40
   6 -12  -5   30.50    7.10
  12   6  -5   36.90    4.40
 -12  -6  -5   23.00    9.40
  -6  12   5   22.60    3.50
   6 -12   5   30.80    9.10
 -12  -6   5   30.40    8.00
  12   6   5   24.60    2.80
  12   5  -5   -1.20    2.30
   5 -12  -5   -5.40    3.90
 -12  -5  -5    5.00    7.20
  -5  12   5   -1.00    2.20
   5 -12   5   -2.50    5.30
 -12  -5   5   -8.30    3.80
  12   5   5    0.80    1.40
  -4  12  -5   -0.20    1.20
   4 -12  -5    3.80    4.80
 -12  -4  -5    1.00    7.60
  12   4  -5    1.60    2.30
   4 -12   5    4.50    5.20
 -12  -4   5   -3.90    4.70
  12   4   5    0.60    1.20
  -4  12   5    1.00    2.10
 -12  -3  -5   91.69   15.70
 -12  -3  -5  101.29    6.50
  12   3  -5   99.19    6.80
   3 -12  -5   84.09   11.20
  -3  12  -5   99.89    5.30
  -3  12   5   92.79    6.40
 -12  -3   5  120.19   13.70
  12   3   5  102.79    5.00
   3 -12   5  108.49   14.60
 -12  -2  -5   10.40    8.40
  -2  12  -5   19.30    2.30
   2 -12  -5   21.70    6.50
  12   2  -5   20.00    3.40
  12   2   5   22.30    1.80
   2 -12   5   21.20    7.10
 -12  -2   5   17.70    6.20
  -2  12   5   15.70    3.00
 -12  -1  -5    0.70    7.60
 -12  -1  -5    0.00    0.70
  12   1  -5   -0.90    2.20
  -1  12  -5    1.00    1.50
   1 -12  -5    2.70    4.60
  -1  12   5    1.30    1.90
  12   1   5    0.50    0.60
 -12  -1   5    3.00    4.50
   1 -12   5   -5.90    4.70
   0  12  -5   41.90    3.60
 -12   0  -5   76.29   15.50
  12   0  -5   45.70    5.20
   0 -12  -5   49.99    8.10
   0  12   5   50.89    4.40
   0 -12   5   55.19    9.90
 -12   0   5   58.29    9.90
 -12   1  -5    0.80    6.20
  -1 -12  -5    6.10    4.70
  12  -1  -5    1.90    4.10
   1  12  -5    0.70    1.70
  -1 -12   5    0.70    4.60
   1  12   5   -0.20    1.80
 -12   1   5    1.80    6.00
  12  -2  -5   14.80    3.40
  -2 -12  -5   10.40    4.80
 -12   2  -5   24.50   10.70
   2  12  -5   18.10    2.50
 -12   2   5   24.20    8.10
   2  12   5   23.30    3.10
  -2 -12   5   14.90    6.10
  12  -3  -5  100.69    6.90
 -12   3  -5   92.29   19.80
  -3 -12  -5  101.09   12.80
   3  12  -5  102.29    6.00
   3  12   5   95.89    6.20
  -3 -12   5  108.69   13.80
 -12   3   5   80.79   13.90
   4  12  -5    0.50    1.80
  -4 -12  -5    6.70    5.60
  12  -4  -5    0.90    2.60
 -12   4  -5   -5.60    9.80
 -12   4   5    2.20    8.10
  -4 -12   5   -6.20    3.60
   4  12   5    2.20    2.10
   5  12  -5    1.00    2.20
  -5 -12  -5    2.10    9.10
 -12   5  -5    9.60   10.70
  12  -5  -5   -1.20    2.30
  -5 -12   5    3.00    5.60
   5  12   5    0.50    2.00
 -12   5   5    4.30    9.40
  12  -6  -5   25.90    6.40
   6  12  -5   27.50    3.50
  12  -6  -5   31.40    4.60
  -6 -12  -5   31.20    8.50
 -12   6  -5   28.70   14.50
   6  12   5   33.60    3.60
  -6 -12   5   32.50    8.30
  12  -7  -5   -0.80    4.10
   7  12  -5    0.20    2.20
  -7 -12  -5    6.40    5.80
 -12   7  -5    1.00   13.00
  12  -7  -5    5.90    3.10
   7  12   5    2.50    2.20
  -7 -12   5    4.30    5.80
  -8 -12  -5   29.40    9.60
  12  -8  -5   29.90    6.60
 -12   8  -5   -1.20   11.80
   8  12  -5   25.80    3.60
  12  -8  -5   25.90    4.10
  -8 -12   5   25.40    7.40
   8  12   5   34.00    3.80
  12  -9  -5   14.80    5.70
  -9 -12  -5    9.00    8.60
 -12   9  -5  -17.30   12.40
  12  -9  -5   15.00    3.60
   9  12  -5   19.70    3.40
   9  12   5   16.10    3.00
  12  -9   5   28.70   10.60
  -9 -12   5   10.80    7.10
  10  12  -5    0.80    2.30
 -10 -12  -5    3.00    8.60
  12 -10  -5    5.70    3.10
  12 -10  -5    5.30    5.80
  12 -10   5   -6.60    7.60
  10  12   5    2.40    2.60
 -10 -12   5    8.80    7.90
   9 -13  -5    7.00    6.70
   9 -13  -5   11.00    4.10
 -13  -9  -5   18.10   10.80
  13   9  -5    1.70    2.70
  13   9   5    5.00    2.20
   9 -13   5   -8.00    8.10
 -13  -9   5   -1.90    7.50
  13   8  -5    1.50    3.00
 -13  -8  -5   -1.20    7.90
   8 -13  -5    3.20    5.90
   8 -13  -5    3.90    3.10
 -13  -8   5   -7.40    6.20
   8 -13   5    4.10    8.70
  13   8   5   -1.10    1.80
  13   7  -5   81.99    6.40
   7 -13  -5   55.79    5.60
   7 -13  -5   68.39   10.80
 -13  -7  -5   80.09   15.80
 -13  -7   5   52.99   10.70
   7 -13   5   57.89   12.40
  13   7   5   69.99    4.80
 -13  -6  -5    6.20    7.70
  13   6  -5   -1.60    2.30
  -6  13  -5    3.10    1.40
   6 -13  -5    0.80    5.10
  13   6   5    1.20    1.60
 -13  -6   5   -0.20    6.20
   6 -13   5   -0.50    5.70
  -6  13   5    0.40    2.30
 -13  -5  -5   14.20    8.80
   5 -13  -5   19.60    6.30
  -5  13  -5   34.10    2.90
  13   5  -5   30.10    4.30
  -5  13   5   38.30    4.20
   5 -13   5   32.60    8.90
  13   5   5   29.90    2.80
 -13  -5   5   24.90    8.50
  -4  13  -5   39.50    3.10
   4 -13  -5   25.20    7.30
  13   4  -5   34.10    4.40
 -13  -4  -5   39.80   12.30
 -13  -4   5   32.00    8.80
  -4  13   5   33.80    4.00
  13   4   5   37.80    3.00
   4 -13   5   49.30   10.00
   3 -13  -5   25.80    7.00
  -3  13  -5   21.40    2.50
 -13  -3  -5   11.30    9.20
  13   3  -5   23.40    3.80
 -13  -3   5   18.30    7.70
  -3  13   5   18.40    3.10
  13   3   5   24.80    2.10
   3 -13   5    9.90    6.10
 -13  -2  -5    8.20    9.20
  -2  13  -5   15.40    2.20
  13   2  -5   10.60    3.10
   2 -13  -5   13.30    6.30
  -2  13   5   12.80    3.00
 -13  -2   5   16.90    6.80
   2 -13   5   10.50    7.00
  13   2   5   16.40    1.50
   1 -13  -5   73.99   11.10
 -13  -1  -5   51.49   14.00
  13   1  -5   77.09    6.10
  -1  13  -5   80.29    4.90
 -13  -1   5   62.39   10.80
   1 -13   5   85.39   13.40
  13   1   5   77.39    3.50
  -1  13   5   75.69    5.60
  13   0  -5   -1.90    2.20
   0  13  -5   -1.40    1.60
   0 -13  -5    1.00    5.10
 -13   0  -5    8.50    6.80
   0  13   5    3.30    2.30
 -13   0   5    7.40    5.90
   0 -13   5   -2.20    5.90
 -13   1  -5   89.39   17.60
   1  13  -5   81.79    5.10
  13  -1  -5   74.99    6.10
  -1 -13  -5   97.49   12.90
   1  13   5   72.39    5.50
 -13   1   5   59.29   11.50
  -1 -13   5   61.79   10.40
  -2 -13  -5    5.60    5.30
  13  -2  -5   13.20    3.30
   2  13  -5   13.20    2.90
 -13   2  -5   13.50   11.60
 -13   2   5   10.10    7.50
   2  13   5   12.90    2.70
  -2 -13   5   11.70    6.10
  13  -3  -5   24.40    3.90
 -13   3  -5   10.90   10.50
   3  13  -5   21.20    3.10
  -3 -13   5   26.90    7.40
 -13   3   5   19.90    9.70
   3  13   5   25.20    3.30
  -4 -13  -5   40.00    9.10
   4  13  -5   41.90    3.90
  13  -4  -5   44.60    5.00
 -13   4  -5   24.10   14.50
   4  13   5   31.00    3.80
 -13   4   5   22.80   11.20
  -4 -13   5   30.40    8.60
   5  13  -5   31.50    3.80
  -5 -13  -5   16.10    7.30
 -13   5  -5   19.20   15.60
  13  -5  -5   28.20    4.20
  -5 -13   5   24.70    8.30
 -13   5   5   14.10   11.80
   5  13   5   31.70    3.90
  -6 -13  -5   -0.80    5.90
 -13   6  -5    6.60   13.10
  13  -6  -5   -2.60    4.10
   6  13  -5    1.80    2.40
  13  -6  -5    4.50    3.00
   6  13   5    1.60    2.20
  -6 -13   5   -5.90    5.70
  13  -7  -5   64.39    6.10
  -7 -13  -5   65.09   13.10
  13  -7  -5   60.29    9.40
 -13   7  -5   29.40   16.80
   7  13  -5   76.89    5.70
   7  13   5   64.39    5.50
  -7 -13   5   54.39   10.70
  13  -8  -5   -4.50    4.90
   8  13  -5    0.80    2.30
  13  -8  -5    0.10    2.70
 -13   8  -5   -1.50   13.80
  -8 -13  -5    3.10    7.30
  -8 -13   5    2.30    6.50
   8  13   5    4.10    2.70
  -9 -13  -5    1.60    9.60
  13  -9  -5    1.10    5.80
 -13   9  -5   18.50   18.90
  13  -9  -5   11.90    3.30
   9  13  -5    2.70    2.70
   9  13   5    5.70    2.70
  -9 -13   5   -0.60    6.40
  13  -9   5    5.20    8.40
 -14  -7  -5   -1.40    8.80
   7 -14  -5    1.70    3.30
  14   7  -5   -2.10    2.50
   7 -14  -5    3.60    6.20
   7 -14   5    3.20    7.70
 -14  -7   5    9.60    7.30
  -7  14   5    2.90    2.30
  14   7   5    1.20    2.00
  -6  14  -5   51.09    3.60
 -14  -6  -5   57.69   13.50
  14   6  -5   39.80    4.90
   6 -14  -5   38.90    8.70
  -6  14   5   52.19    5.10
  14   6   5   44.80    3.80
   6 -14   5   53.79   12.50
 -14  -6   5   44.10   10.20
 -14  -5  -5   15.40    9.20
   5 -14  -5    2.20    6.40
  14   5  -5    9.00    3.10
  -5  14  -5    9.90    1.80
  -5  14   5   13.50    3.40
  14   5   5   11.20    2.00
 -14  -5   5   18.70    8.60
   5 -14   5   12.10    7.60
 -14  -4  -5   -1.30    8.90
  14   4  -5    1.00    2.60
  -4  14  -5    1.90    1.60
   4 -14  -5    3.50    6.00
   4 -14   5   -4.30    5.90
  14   4   5   -0.70    1.40
  -4  14   5   -2.40    2.20
   3 -14  -5   -5.50    6.10
  14   3  -5    7.00    2.80
  -3  14  -5    2.20    1.70
 -14  -3  -5    2.80   10.10
  -3  14   5    3.50    2.60
   3 -14   5    9.50    7.50
  14   3   5    4.80    1.40
 -14  -3   5    4.60    7.20
  14   2  -5   -1.30    2.60
   2 -14  -5    4.30    6.90
 -14  -2  -5   -2.80    9.20
  -2  14  -5    1.50    1.60
 -14  -2   5    1.90    7.30
  -2  14   5   -3.60    2.00
   2 -14   5    5.30    5.60
  -1  14  -5    3.00    1.80
  14   1  -5    5.30    2.90
 -14  -1  -5   -2.20    8.80
   1 -14  -5   -2.00    5.40
   1 -14   5   -1.40    6.30
 -14  -1   5  -15.00    6.70
  -1  14   5    1.90    2.40
 -14   0  -5   89.19   18.80
   0  14  -5   88.09    5.60
  14   0  -5   79.29    6.70
   0 -14   5   89.69   13.90
   0  14   5   88.19    6.30
 -14   0   5   83.99   14.30
  14  -1  -5    4.90    2.80
  -1 -14  -5    3.60    5.80
 -14   1  -5  -14.90    8.40
   1  14  -5    2.40    1.90
   1  14   5    5.50    2.50
 -14   1   5    7.60    9.20
  -1 -14   5    4.50    6.10
   2  14  -5    0.60    1.90
  14  -2  -5    0.60    2.60
 -14   2  -5    5.80   10.40
  -2 -14  -5   -6.20    5.70
  -2 -14   5  -10.20    4.50
   2  14   5   -2.10    2.10
 -14   2   5  -14.60    8.10
  14  -3  -5    4.30    2.80
   3  14  -5    0.90    2.20
 -14   3  -5    5.30   11.90
  -3 -14  -5    3.30    5.60
 -14   3   5    4.00   10.50
  -3 -14   5   -1.00    5.20
   3  14   5    4.30    2.70
 -14   4  -5    2.50   10.90
   4  14  -5   -0.60    2.10
  -4 -14  -5    5.00    6.60
  14  -4  -5    0.10    2.50
   4  14   5    2.10    2.30
  -4 -14   5    0.30    5.50
 -14   4   5   23.90   12.90
   5  14  -5   10.60    2.80
  -5 -14  -5   24.80    8.70
 -14   5  -5   -3.70   10.80
  14  -5  -5    9.80    3.30
  -5 -14   5   13.80    7.20
   5  14   5   13.50    3.00
 -14   5   5   -2.70   14.00
  14  -6  -5   44.20    5.20
 -14   6  -5   21.00   16.80
  14  -6  -5   38.20    8.30
  -6 -14  -5   38.90   10.80
   6  14  -5   66.19    5.30
  -6 -14   5   44.80   10.60
   6  14   5   51.89    4.90
  14  -7  -5    1.80    6.00
  14  -7  -5    5.40    2.90
  -7 -14  -5    4.20    7.60
 -14   7  -5   -4.90   14.50
  -7 -14   5   -3.00    6.00
   5 -15  -5    9.70    6.80
  15   5  -5   12.70    3.60
  -5  15  -5   19.30    2.60
 -15  -5  -5   -3.20    9.20
   5 -15   5    6.90    7.60
  -5  15   5   15.10    3.50
 -15  -5   5   24.00    9.60
  -4  15  -5    1.80    1.90
 -15  -4  -5   14.30   11.40
   4 -15  -5   -4.60    6.00
  15   4  -5   -1.30    2.50
   4 -15   5   -1.00    7.50
 -15  -4   5    8.80    8.80
  15   3  -5   14.50    3.80
 -15  -3  -5    6.60    9.70
  -3  15  -5   16.30    2.80
   3 -15  -5   22.30    8.30
   3 -15   5   14.40    8.00
  -3  15   5   19.00    3.50
 -15  -3   5   28.30   10.50
  -2  15  -5   -0.40    1.80
  15   2  -5    4.20    2.90
 -15  -2  -5   -8.80    9.60
   2 -15  -5    3.30    6.60
  -2  15   5    1.40    2.50
 -15  -2   5    7.90   10.40
   2 -15   5    2.60    6.30
  15   1  -5    0.10    2.70
   1 -15  -5    1.30    6.30
 -15  -1  -5    7.80   10.30
  -1  15  -5    2.50    2.00
  -1  15   5    1.40    2.60
 -15  -1   5   -4.50    8.50
   1 -15   5    5.30    6.80
 -15   0  -5   22.00   12.20
   0 -15  -5   28.20    8.30
  15   0  -5   22.60    4.20
   0  15  -5   17.70    2.90
   0  15   5   27.60    3.80
 -15   0   5   31.00   11.00
   0 -15   5   23.60    9.20
  -1 -15  -5    2.60    6.70
 -15   1  -5    5.30   11.10
   1  15  -5    4.30    2.20
  15  -1  -5    7.20    3.10
   1  15   5    3.70    2.60
  -1 -15   5    4.50    6.80
 -15   1   5    8.80   10.60
 -15   2  -5   -7.40   11.10
   2  15  -5   -1.90    1.80
  15  -2  -5    0.10    2.70
  -2 -15  -5   -3.10    6.10
 -15   2   5    7.30   11.50
   2  15   5    2.80    2.50
  -2 -15   5   -2.70    6.50
 -15   3  -5    2.40   19.30
  15  -3  -5   19.30    3.90
  -3 -15  -5   21.00    8.00
   3  15  -5   12.10    2.90
  -3 -15   5   30.90    8.90
 -15   3   5   11.80   14.20
   3  15   5   16.10    3.90
  15  -4  -5    0.40    2.70
 -15   4  -5   19.00   14.60
  -4 -15  -5   -9.00    6.70
   4  15  -5   -5.00    2.10
 -15   4   5  -12.70   16.00
   4  15   5    3.30    3.40
  -4 -15   5   -4.80    6.40
  15  -5  -5    5.70    3.20
  -5 -15  -5   24.00    8.80
   5  15  -5   17.20    3.40
 -15   5  -5    1.40   14.00
   5  15   5   13.70    3.30
 -15   5   5   21.20   21.10
  -5 -15   5    7.60    9.20
   0   0  -6  468.15   19.70
   0   0   6  474.75   21.20
   0   0   6  449.95   21.10
  -1   0  -6  175.78    8.20
  -1   0  -6  172.58   13.90
   0  -1  -6  187.68    8.50
   0  -1  -6  168.28   11.90
   0   1  -6  183.38    8.30
  -1   0  -6  184.18    8.30
   0   1  -6  185.18    8.40
   1   0  -6  187.78    8.50
   1   0  -6  191.78    8.60
   0  -1  -6  174.88    8.30
   0  -1   6  192.38   10.30
  -1   0   6  181.78    9.00
   1   0   6  187.38   10.50
   0  -1   6  206.88   11.20
  -1   0   6  188.98    8.90
   0   1   6  185.78    9.10
  -1   1  -6   83.39   11.20
   1  -1  -6   71.29    4.00
   1   1  -6   72.69    4.00
  -1  -1  -6   82.79    4.00
   1   1  -6   73.99    4.10
  -1  -1  -6   70.39    7.50
   1  -1  -6   79.19    4.20
  -1  -1  -6   73.99    3.80
  -1   1  -6   70.59    3.80
  -1   1  -6   83.09    4.00
  -1  -1   6   77.39    5.10
  -1   1   6   72.39    3.50
   1   1   6   74.89    5.30
   1  -1   6   79.79    6.60
  -1  -1   6   79.69    6.00
  -1   1   6   72.69    3.50
  -2  -1  -6  187.48    8.70
   2   1  -6  186.58    9.20
   1  -2  -6  194.68    9.10
  -1   2  -6  210.38    8.90
   2   1  -6  208.38    9.30
  -1   2  -6  196.18    8.80
  -2  -1  -6  211.98    8.90
  -2  -1  -6  177.98   13.40
   1  -2  -6  207.58    9.30
   2   1   6  210.68   11.30
   1  -2   6  231.28   13.80
  -2  -1   6  200.88    9.70
   1  -2   6  208.68   12.00
  -2  -1   6  181.78    9.00
   0  -2  -6  128.49    9.30
  -2   0  -6  143.49    6.60
   2   0  -6  155.58    7.20
  -2   0  -6  150.78    6.70
   0  -2  -6  147.69    6.90
   0   2  -6  153.18    6.90
  -2   0  -6  158.58   12.90
   0  -2  -6  153.28    7.10
   0   2  -6  150.78    6.90
   0  -2   6  133.69    6.80
   0  -2   6  146.09    9.20
   0  -2   6  154.18   11.00
   0   2   6  147.99    8.10
   2   0   6  153.18    9.50
   1   2  -6  191.38    9.00
  -2   1  -6  202.18    8.70
  -1  -2  -6  184.58    8.70
   2  -1  -6  207.78    9.30
  -1  -2  -6  191.98    8.90
  -1  -2  -6  209.18   12.40
  -2   1  -6  197.68   16.50
  -2   1  -6  197.48    8.60
  -1  -2   6  200.08   10.70
  -1  -2   6  180.08    8.90
  -1  -2   6  238.28   13.70
   1   2   6  199.68   10.20
   2  -1   6  201.18   12.50
   2   2  -6   28.80    2.40
  -2  -2  -6   31.00    2.30
   2  -2  -6   26.20    2.50
  -2   2  -6   28.20    1.90
  -2  -2  -6   25.40    4.90
  -2   2  -6   34.30    9.40
  -2   2  -6   27.60    1.90
  -2  -2   6   34.70    3.40
   2   2   6   29.30    2.20
  -2  -2   6   26.40    2.30
  -2  -2   6   39.50    6.40
   2  -2   6   37.50    5.90
   2   2   6   31.00    3.90
  -2   3  -6   29.60    1.90
  -2   3  -6   16.60    6.80
  -2   3  -6   31.20    1.90
  -3  -2  -6   31.70    5.80
  -3  -2  -6   24.50    1.90
   3   2  -6   22.20    2.40
   2  -3  -6   35.90    4.30
   3   2   6   31.80    2.20
   2  -3   6   28.60    6.40
   2  -3   6   18.90    4.40
  -3  -2   6   30.70    3.50
   3   2   6   26.40    4.00
  -3  -2   6   34.00    6.50
  -3  -1  -6  101.09    4.80
  -3  -1  -6  101.49   10.10
   1  -3  -6  104.69    5.50
   3   1  -6  105.59    5.50
  -1   3  -6  102.39    5.00
  -3  -1  -6  104.49    4.90
   1  -3   6  108.39   10.10
  -3  -1   6  108.89    7.00
  -3  -1   6  107.69    5.60
   1  -3   6  114.09    8.40
   3   1   6   99.89    7.50
   1  -3   6   91.89    4.90
  -3   0  -6  219.88    9.20
   3   0  -6  212.98    9.80
   0  -3  -6  208.38   11.40
  -3   0  -6  168.68   14.80
   0   3  -6  207.48    9.40
   0  -3  -6  221.48    9.70
  -3   0  -6  209.18    9.00
   0   3   6  215.38   10.40
   0  -3   6  234.28   15.80
   0  -3   6  197.88    9.30
   3   0   6  207.78   12.70
   0  -3   6  204.28   12.30
   0   3   6  208.58    9.70
   1   3  -6   96.99    5.00
  -3   1  -6   96.39    4.60
   3  -1  -6  107.59    5.50
  -3   1  -6   83.19   12.30
  -1  -3  -6   98.69    4.90
  -3   1  -6   97.69    4.50
  -1  -3  -6  101.19    7.60
   1   3   6   99.19    5.10
  -1  -3   6   98.29    5.00
   1   3   6   94.39    6.20
  -1  -3   6  115.29   11.20
  -1  -3   6   91.79    7.10
  -3   2  -6   41.20    9.40
  -2  -3  -6   30.90    2.10
  -3   2  -6   30.10    1.70
  -2  -3  -6   27.80    5.00
  -3   2  -6   24.80    1.70
   2   3  -6   33.70    2.60
   3  -2  -6   29.20    3.30
   2   3   6   28.80    2.30
   3  -2   6   26.30    5.50
  -2  -3   6   26.20    2.30
   2   3   6   31.60    3.90
  -2  -3   6   34.70    7.20
  -2  -3   6   27.50    3.80
  -3   3  -6  361.66   15.30
   3   3  -6  374.06   16.10
  -3  -3  -6  357.26   20.30
  -3   3  -6  361.46   27.70
  -3  -3  -6  352.46   15.50
   3  -3  -6  385.06   16.30
  -3   3  -6  372.56   15.30
  -3  -3   6  416.36   24.70
   3  -3   6  432.26   23.20
   3   3   6  346.47   18.40
   3   3   6  358.26   15.70
  -3  -3   6  334.67   17.80
  -4  -3  -6  355.66   15.20
  -3   4  -6  355.06   28.20
   3  -4  -6  380.06   16.10
  -4  -3  -6  350.86   20.90
   4   3  -6  352.26   15.90
  -3   4  -6  368.66   15.00
   4   3  -6  349.77   18.50
  -3   4  -6  355.96   14.90
   4   3   6  362.96   15.40
  -4  -3   6  349.57   17.70
   4   3   6  346.77   18.70
   3  -4   6  357.86   20.60
   4   2  -6   35.70    3.10
  -4  -2  -6   24.50    5.70
   2  -4  -6   27.80    2.70
  -2   4  -6   34.10    2.10
  -4  -2  -6   30.90    2.00
  -4  -2   6   31.20    3.50
   2  -4   6   29.10    5.40
   4   2   6   28.10    2.10
   2  -4   6   28.80    2.00
  -4  -2   6   35.20    7.10
   2  -4   6   39.20    8.00
   4   2   6   27.60    4.60
  -4  -1  -6   31.00    2.10
   4   1  -6   27.30    2.70
   1  -4  -6   34.40    2.90
  -4  -1  -6   31.80    1.90
   1  -4  -6   35.90    3.50
  -4  -1  -6   37.00    7.40
  -1   4  -6   31.90    2.20
  -1   4   6   32.70    2.90
   1  -4   6   41.40    7.60
  -1   4   6   31.40    2.40
   4   1   6   33.80    5.10
  -4  -1   6   33.80    4.90
  -4  -1   6   33.20    2.80
   1  -4   6   31.30    2.20
   1  -4   6   39.30    5.70
   0   4  -6   85.39    4.40
   4   0  -6   87.69    4.90
  -4   0  -6   81.39    3.80
  -4   0  -6   84.69    4.00
  -4   0  -6   89.99   11.60
   0  -4  -6   88.49    6.10
   0   4   6   81.29    5.20
   4   0   6   81.59    7.60
   0  -4   6   97.09   12.70
   0   4   6   78.09    4.60
   0  -4   6   95.29    7.60
  -4   1  -6   31.30    1.70
  -1  -4  -6   36.30    4.80
  -4   1  -6   20.90    7.60
  -4   1  -6   32.10    1.80
   1   4  -6   32.00    2.50
   4  -1  -6   40.40    3.30
   1   4   6   32.30    2.60
  -1  -4   6   29.60    2.40
  -1  -4   6   28.10    7.70
   1   4   6   33.50    3.80
   4  -1   6   27.80    5.40
  -1  -4   6   37.20    4.90
  -4   2  -6   23.60    8.00
   4  -2  -6   29.00    2.80
  -2  -4  -6   32.50    5.30
   2   4  -6   28.30    2.50
  -4   2  -6   31.40    1.70
  -2  -4   6   54.39   10.50
  -2  -4   6   27.80    4.10
   2   4   6   34.50    2.60
   2   4   6   35.70    4.40
   4  -2   6   31.30    7.50
  -4   3  -6  312.57   26.70
  -3  -4  -6  349.37   19.90
   4  -3  -6  361.96   16.10
  -4   3  -6  349.47   14.60
  -3  -4  -6  368.16   15.70
  -4   3  -6  356.66   14.70
  -3  -4   6  433.76   27.20
  -3  -4   6  344.77   18.10
   3   4   6  353.86   15.40
  -4  -4  -6   52.49    7.60
   4   4  -6   45.20    6.10
   4  -4  -6   56.99    4.00
   4   4  -6   50.79    3.70
  -4   4  -6   39.90   11.00
  -4   4  -6   51.29    2.30
  -4   4  -6   49.80    2.30
  -4  -4  -6   51.79    3.00
  -4  -4   6   54.29    6.10
   4   4   6   61.69    6.80
   4   4   6   55.59    3.30
  -4   5  -6   68.79   13.70
  -4   5  -6  103.49    4.80
   4  -5  -6  117.19    6.20
  -4   5  -6  104.69    4.50
  -5  -4  -6  111.99   10.80
   5   4  -6  114.19    6.00
  -5  -4  -6   92.29    5.00
  -5  -4   6  109.69    8.10
   5   4   6  100.79    5.20
   4  -5   6  115.89   10.60
  -5  -3  -6   31.60    7.00
   3  -5  -6   50.19    3.80
   5   3  -6   49.00    3.60
  -3   5  -6   46.50    2.40
   5   3  -6   38.10    5.20
  -5  -3  -6   46.40    2.70
   3  -5   6   63.09    8.30
   5   3   6   48.50    2.80
   3  -5   6   39.70    2.40
  -5  -3   6   47.90    5.00
  -2   5  -6  321.37   13.60
   5   2  -6  337.67   14.50
  -5  -2  -6  305.47   20.40
  -5  -2  -6  330.67   13.50
   5   2  -6  311.17   16.20
   2  -5  -6  296.87   14.30
   2  -5  -6  321.27   14.50
   2  -5  -6  304.27   15.80
  -2   5   6  332.57   14.50
   2  -5   6  300.57   13.70
  -5  -2   6  323.57   15.60
   2  -5   6  336.27   19.10
   5   2   6  333.07   13.70
  -5  -1  -6   14.00    1.30
  -5  -1  -6   14.20    1.20
  -5  -1  -6    8.00    4.70
   5   1  -6   14.50    2.50
   5   1  -6   15.50    2.20
  -1   5  -6   12.20    1.50
  -5  -1   6   11.70    2.10
   5   1   6   13.20    1.30
   1  -5   6   14.90    4.00
   1  -5   6   10.70    1.40
  -1   5   6   15.30    2.10
  -1   5   6   15.00    2.30
   5   0  -6    0.50    1.40
  -5   0  -6   -1.80    3.50
  -5   0  -6    1.80    0.50
   0  -5  -6    2.70    1.90
   0   5  -6    0.70    1.00
  -5   0  -6    1.20    0.60
   0   5   6    0.00    1.10
   0  -5   6    6.80    6.30
   0  -5   6    0.50    1.00
   0  -5   6   -2.30    2.40
   0   5   6    2.90    1.60
  -5   1  -6   11.70    0.80
  -5   1  -6   16.10    6.50
   1   5  -6    7.20    1.50
  -1  -5  -6    8.50    3.00
  -5   1  -6   11.80    0.90
   5  -1  -6   12.10    2.00
  -1  -5   6   12.20    7.40
   1   5   6   10.50    1.70
  -1  -5   6    8.00    3.20
  -1  -5   6   10.90    1.50
   1   5   6    7.70    2.30
  -2  -5  -6  328.07   17.90
   5  -2  -6  317.87   14.70
   2   5  -6  332.77   14.20
  -2  -5   6  315.27   17.50
  -2  -5   6  368.86   26.50
   2   5   6  305.67   14.50
   2   5   6  314.57   16.50
  -3  -5  -6   46.80    6.90
  -5   3  -6   41.90   11.30
   5  -3  -6   41.80    3.80
   3   5  -6   43.70    3.40
   3   5   6   43.60    5.60
  -3  -5   6   65.29   13.00
  -3  -5   6   47.30    6.00
   4   5  -6   89.79    8.80
  -5   4  -6   88.99   15.80
   4   5  -6  109.89    5.80
   5  -4  -6   99.59    6.00
  -4  -5  -6   97.59    9.70
   4   5   6  102.89    5.80
  -4  -5   6  118.19    8.80
   5   5  -6   13.80    4.40
   5  -5  -6   24.70    3.10
   5   5  -6   31.50    3.00
  -5  -5  -6   24.00    5.80
  -5   5  -6    9.80    8.30
   5   5   6   21.70    2.60
  -5  -5   6   18.20    4.20
   5  -6  -6   -0.70    1.60
  -5   6  -6    7.50    8.50
   5  -6  -6    0.00    0.90
   5  -6  -6    0.80    1.30
  -6  -5  -6    6.40    4.60
   6   5  -6    2.00    1.60
   5  -6   6   -3.90    2.60
  -6  -5   6    1.10    3.00
   6   4  -6   28.40    5.50
  -6  -4  -6   31.70    2.40
   4  -6  -6   33.40    2.70
  -6  -4  -6   55.69    9.10
   4  -6  -6   37.90    3.30
   4  -6  -6   39.50    3.70
   6   4  -6   32.10    3.20
   4  -6   6   39.90    7.60
   4  -6   6   30.50    1.90
   6   4   6   33.50    2.50
  -6  -4   6   30.30    5.00
  -6  -3  -6  111.39   11.60
  -3   6  -6  103.19    4.70
   3  -6  -6   98.79    5.70
   6   3  -6  102.69    8.30
   6   3  -6   99.89    5.90
  -6  -3  -6   98.29    5.10
   3  -6  -6   94.59    5.80
  -6  -3   6  105.29    7.70
   3  -6   6   99.69    4.80
   6   3   6  101.49    5.00
  -3   6   6  103.19    5.90
   3  -6   6  122.69   10.80
  -2   6  -6   31.80    2.10
   6   2  -6   31.10    4.60
   2  -6  -6   27.10    5.80
   6   2  -6   26.10    2.90
  -6  -2  -6   30.20    2.00
  -6  -2  -6   26.30    7.40
   2  -6  -6   34.40    3.70
   6   2   6   31.50    2.10
  -2   6   6   37.00    3.10
  -6  -2   6   24.70    3.80
   2  -6   6   38.70    6.60
   2  -6   6   29.40    2.20
  -6  -1  -6  130.99    5.80
  -6  -1  -6  114.89   12.50
   6   1  -6  137.29    8.00
   6   1  -6  137.69    7.10
   1  -6  -6  129.09    8.10
  -1   6  -6  125.79    6.10
   6   1   6  135.29    5.90
  -1   6   6  123.29    7.80
   1  -6   6  126.29   10.70
  -6  -1   6  130.09    7.80
  -1   6   6  132.29    6.80
   1  -6   6  130.99    6.70
  -6   0  -6  304.57   21.80
  -6   0  -6  299.57   12.10
   6   0  -6  297.47   13.50
   6   0  -6  274.47   13.40
   0  -6  -6  279.67   15.30
   0   6  -6  298.27   12.80
  -6   0  -6  305.97   12.20
   0  -6   6  295.67   17.50
   0   6   6  282.07   14.80
   0   6   6  296.27   13.20
  -6   0   6  281.57   13.70
   0  -6   6  275.27   12.90
  -6   1  -6  124.89   16.40
  -1  -6  -6  123.89    9.30
   6  -1  -6  136.19    7.10
   1   6  -6  135.19    6.50
   1   6   6  126.79    8.50
  -1  -6   6  111.89    9.90
   1   6   6  131.69    6.60
  -2  -6  -6   39.40    5.90
   6  -2  -6   30.50    3.30
   2   6  -6   34.50    2.90
  -6   2  -6   17.20    6.10
   2   6   6   31.20    4.80
   2   6   6   32.40    2.80
  -2  -6   6   27.10    5.10
   6  -3  -6  103.79    6.20
  -6   3  -6  129.09   18.90
  -3  -6  -6  102.89    9.40
   3   6  -6  103.09    5.70
   3   6   6   98.19    8.00
   3   6   6  107.29    5.60
  -3  -6   6  100.39    8.80
  -6   4  -6   23.20    8.80
   6  -4  -6   35.30    3.70
   4   6  -6   40.60    3.50
  -4  -6  -6   41.20    7.20
  -4  -6   6   31.80    5.30
   4   6   6   40.40    3.00
   5   6  -6    0.30    1.60
   6  -5  -6   -1.40    1.60
  -5  -6  -6   -0.60    3.20
  -6   5  -6    4.50    7.90
   5   6   6    1.00    1.30
  -5  -6   6   -2.00    2.90
  -6  -6  -6  107.59   12.70
   6  -6  -6  106.59    6.10
  -6   6  -6  114.29   21.20
   6  -6  -6  110.39    7.10
   6   6  -6  122.19    6.60
   6  -6  -6  119.79    6.90
  -6  -6   6  107.29    9.60
   6   6   6  112.19    5.90
  -7  -6  -6  265.77   19.90
   7   6  -6  270.87   12.90
   6  -7  -6  235.38   13.70
   6  -7  -6  263.97   13.50
   6  -7  -6  266.87   13.20
   7   6   6  270.77   12.10
  -7  -6   6  302.57   17.40
   6  -7   6  316.67   20.90
   7   5  -6    7.10    2.20
  -7  -5  -6    1.90    4.60
  -5   7  -6    4.80    0.50
   5  -7  -6    3.40    2.20
   5  -7  -6    4.90    2.10
   5  -7  -6    4.60    2.70
   5  -7   6    8.50    4.80
  -7  -5   6    1.00    3.30
   7   5   6    3.40    1.40
   4  -7  -6    1.90    1.90
   7   4  -6    1.40    1.80
  -7  -4  -6   -1.60    3.50
   4  -7  -6    0.20    3.00
  -7  -4  -6    1.50    1.00
  -4   7  -6    3.00    0.70
   7   4  -6   -4.00    2.80
   4  -7  -6    4.10    2.00
   7   4   6    3.10    1.10
  -4   7   6    4.60    1.90
  -7  -4   6    4.10    3.00
   4  -7   6    0.80    0.80
   4  -7   6   -3.50    3.60
  -3   7  -6   37.70    2.20
   7   3  -6   33.30    3.40
   3  -7  -6   22.30    5.20
  -7  -3  -6   54.39    9.70
   7   3  -6   34.00    5.80
   3  -7  -6   39.20    4.00
   7   3   6   34.90    2.40
  -3   7   6   34.30    3.40
   3  -7   6   36.70    2.40
   3  -7   6   31.20    7.40
  -7  -3   6   42.50    5.40
  -2   7  -6   17.40    1.70
  -7  -2  -6   19.20    1.50
   7   2  -6   14.40    3.50
   7   2  -6   19.30    2.70
   2  -7  -6   23.10    3.60
  -7  -2  -6    7.40    5.00
   2  -7  -6   15.90    6.20
   2  -7   6   17.20    5.60
  -2   7   6   15.20    2.50
   7   2   6   16.80    1.50
  -7  -2   6   15.60    3.30
   2  -7   6   19.80    1.90
  -1   7  -6   24.10    2.10
   7   1  -6   25.70    3.90
  -7  -1  -6   30.30    9.00
   1  -7  -6   21.10    3.80
  -7  -1  -6   25.30    1.60
   7   1  -6   35.50    3.40
  -1   7   6   24.30    2.70
  -7  -1   6   25.30    3.90
   1  -7   6   33.50    6.60
   7   1   6   23.80    1.60
  -1   7   6   26.60    3.70
   1  -7   6   25.60    2.30
   7   0  -6  482.85   21.50
   7   0  -6  469.75   22.00
  -7   0  -6  498.65   19.80
   0  -7  -6  493.25   24.10
   0   7  -6  490.25   20.70
  -7   0  -6  479.15   19.80
  -7   0  -6  419.76   30.00
   0  -7   6  476.35   26.20
  -7   0   6  547.05   25.30
   0   7   6  472.35   21.10
   0   7   6  484.15   23.40
   7  -1  -6   26.40    2.70
   7  -1  -6   31.10    3.40
  -7   1  -6   15.90    6.90
  -1  -7  -6   39.10    5.90
  -7   1   6   28.50    4.10
   1   7   6   28.40    4.40
  -1  -7   6   30.80    5.90
   1   7   6   26.40    2.80
   2   7  -6   20.10    2.30
   7  -2  -6   16.70    1.20
  -7   2  -6   16.50    7.00
  -2  -7  -6   27.20    5.50
   7  -2  -6   18.50    2.70
   7  -2  -6   18.50    1.20
   2   7   6   20.20    4.40
   2   7   6   18.10    2.30
  -2  -7   6   14.60    4.90
   7  -3  -6   37.50    3.70
   3   7  -6   37.90    3.30
  -3  -7  -6   42.30    7.10
  -7   3  -6   20.90    9.50
  -3  -7   6   49.60    7.00
   3   7   6   36.40    3.20
  -4  -7  -6    2.40    3.50
  -7   4  -6    2.40    7.60
   7  -4  -6    2.70    1.90
   4   7  -6    2.80    1.70
   4   7   6    4.60    1.50
  -4  -7   6   -1.50    3.10
  -5  -7  -6    5.70    4.50
   7  -5  -6    3.90    1.40
   7  -5  -6    7.30    2.40
   5   7  -6    6.40    2.00
  -7   5  -6   11.60    9.50
   7  -5  -6    4.00    1.30
  -5  -7   6    3.70    3.80
   5   7   6    5.60    1.60
  -6  -7  -6  244.48   18.90
   7  -6  -6  280.77   13.20
   7  -6  -6  254.77   12.80
  -7   6  -6  243.48   31.80
   6   7  -6  279.87   12.80
   6   7   6  270.77   12.10
  -6  -7   6  255.17   16.80
   7  -7  -6   42.40    4.30
  -7   7  -6   25.60   11.90
  -7  -7  -6   31.70    8.70
   7  -7  -6   47.20    4.60
   7  -7  -6   36.20    4.60
   7   7  -6   42.50    3.90
   7   7   6   40.00    3.30
   7  -7   6   37.70    9.00
  -7  -7   6   30.80    6.00
   7  -8  -6   36.70    4.60
   7  -8  -6   42.80    5.80
   8   7  -6   34.50    4.40
   7  -8  -6   43.50    5.20
  -8  -7  -6   49.90   10.50
   8   7   6   39.10    3.40
   7  -8   6   37.80    8.10
  -8  -7   6   38.40    7.50
   8   6  -6    1.30    1.90
  -8  -6  -6    4.40    5.30
   6  -8  -6    0.80    3.10
   6  -8  -6    1.30    2.10
   6  -8  -6   -2.50    1.80
   8   6   6    0.60    1.40
  -8  -6   6   -3.90    3.10
   6  -8   6   -0.70    4.30
   8   5  -6  243.78   12.00
   5  -8  -6  228.28   15.10
  -8  -5  -6  215.48   18.70
   5  -8  -6  253.67   13.50
   5  -8  -6  272.67   12.40
  -8  -5   6  258.37   15.90
   5  -8   6  239.58   18.40
   8   5   6  249.28   11.00
   5  -8   6  233.58   10.40
   4  -8  -6    0.50    3.90
  -4   8  -6    1.10    0.70
   8   4  -6    1.40    2.00
  -8  -4  -6   -1.00    4.70
   4  -8  -6    2.10    2.10
   8   4   6    0.60    1.10
   4  -8   6    2.40    1.00
  -4   8   6   -0.10    1.60
  -8  -4   6    1.60    3.10
   4  -8   6    1.30    3.40
   3  -8  -6    9.90    3.00
   8   3  -6    7.10    2.40
  -8  -3  -6    7.60    1.60
   3  -8  -6    5.40    5.30
  -8  -3  -6   10.20    5.80
   8   3  -6    6.40    3.40
  -3   8  -6   10.00    1.20
   3  -8   6    6.80    4.90
   3  -8   6    9.00    1.50
  -8  -3   6    9.50    3.60
  -3   8   6    3.60    1.90
   8   3   6    9.10    1.30
   2  -8  -6   10.00    6.70
  -8  -2  -6    9.20    5.90
  -2   8  -6   10.70    1.50
   2  -8  -6   10.30    3.20
  -8  -2  -6   10.90    1.20
   8   2  -6   13.00    2.50
   8   2  -6    9.40    3.20
   2  -8   6    8.50    1.50
  -2   8   6   13.10    2.50
  -8  -2   6    6.50    3.20
   2  -8   6   16.50    5.60
   8   2   6   10.60    1.20
  -8  -1  -6  168.28    7.20
   8   1  -6  161.98   10.30
   8   1  -6  165.48    8.80
  -8  -1  -6  158.58   16.40
  -1   8  -6  162.38    7.70
   1  -8  -6  164.68   10.90
  -1   8   6  165.18    8.50
   1  -8   6  171.28   14.00
   8   1   6  169.28    7.20
  -8  -1   6  181.08   11.10
  -1   8   6  165.98   10.70
   0  -8  -6    8.10    3.40
   8   0  -6    8.50    2.40
  -8   0  -6   10.30    6.60
   8   0  -6    8.70    2.30
   0  -8   6    3.70    4.00
  -8   0   6   10.10    3.40
   0   8   6    6.00    3.10
   0   8   6    9.20    2.00
  -1  -8  -6  196.98   12.50
   8  -1  -6  148.99    8.60
  -8   1  -6  138.19   18.80
   8  -1  -6  163.08    9.20
   1   8  -6  179.98    8.20
  -1  -8   6  158.18   12.90
   1   8   6  160.98   11.20
   1   8   6  173.18    8.40
  -8   1   6  169.98   11.40
   8  -2  -6    7.80    2.20
  -8   2  -6   13.70    8.10
  -2  -8  -6   12.20    4.60
   2   8  -6   10.70    1.90
   8  -2  -6    8.60    2.00
   2   8   6    9.40    2.00
  -8   2   6   10.90    3.90
  -2  -8   6   10.90    4.60
  -8   3  -6    1.40    6.20
   8  -3  -6   10.30    2.00
   3   8  -6    6.50    2.00
  -3  -8  -6   14.00    5.20
   8  -3  -6    5.80    2.20
   3   8   6    8.70    1.90
  -3  -8   6   17.20    5.60
   4   8  -6   -0.10    1.50
  -4  -8  -6    5.80    4.40
   8  -4  -6    4.80    2.20
  -8   4  -6   -1.90    6.60
   8  -4  -6    0.40    1.50
   4   8   6    0.60    1.40
  -4  -8   6    2.20    3.90
   8  -5  -6  244.58   13.00
  -5  -8  -6  265.87   18.50
   8  -5  -6  265.07   12.60
   8  -5  -6  236.18   12.10
   5   8  -6  247.28   11.90
  -8   5  -6  199.08   29.00
  -5  -8   6  249.88   17.10
   5   8   6  258.37   11.70
   8  -6  -6   -1.20    2.20
   8  -6  -6   -3.00    1.80
   6   8  -6   -2.10    1.70
   8  -6  -6    1.80    2.20
  -6  -8  -6    2.00    5.20
  -8   6  -6  -12.90    6.70
  -6  -8   6   -1.80    3.50
   6   8   6    2.20    1.60
  -8   7  -6   51.29   18.20
   8  -7  -6   36.30    4.90
   8  -7  -6   43.70    4.90
   7   8  -6   44.20    4.30
   8  -7  -6   49.80    5.20
  -7  -8  -6   47.30    9.70
   7   8   6   40.10    3.50
  -7  -8   6   35.10    7.00
  -8  -8  -6   10.60    6.50
   8  -8  -6   13.40    3.20
   8  -8  -6   12.00    3.70
   8   8  -6   12.00    2.80
   8  -8   6    2.10    5.50
  -8  -8   6   14.40    6.20
   8   8   6   12.10    2.20
   8  -9  -6   -1.50    2.30
   9   8  -6   -0.40    2.30
  -9  -8  -6   -2.60    6.20
   8  -9  -6    0.10    3.10
  -9  -8   6    5.10    5.00
   9   8   6    2.50    1.80
   8  -9   6   -7.60    5.50
   9   7  -6    0.80    2.20
   7  -9  -6    2.90    3.00
   7  -9  -6    1.40    2.50
  -9  -7  -6   10.30    6.00
   7  -9   6    6.80    5.60
  -9  -7   6    7.30    4.80
   9   7   6    4.00    1.70
   6  -9  -6   13.20    3.30
  -9  -6  -6   22.70    8.20
   9   6  -6   14.70    3.10
   6  -9  -6   16.00    4.00
   9   6   6   18.40    2.30
  -9  -6   6   23.80    6.40
   6  -9   6   28.50    8.10
  -5   9  -6    1.20    0.70
  -9  -5  -6    4.10    5.90
   5  -9  -6    3.80    2.20
   5  -9  -6    1.80    2.80
   9   5  -6    0.60    2.00
   5  -9  -6    3.20    5.40
  -9  -5   6    2.00    4.00
   5  -9   6   -3.10    4.00
   9   5   6    1.40    1.30
   5  -9   6    0.90    0.90
  -5   9   6   -0.20    2.00
   4  -9  -6  138.69    9.70
   9   4  -6  131.59    7.70
  -4   9  -6  133.09    6.00
  -9  -4  -6  104.09   15.50
   9   4   6  135.99    6.40
   4  -9   6  125.99    6.30
   4  -9   6  119.59   14.50
  -4   9   6  145.29    7.70
  -9  -3  -6   91.19   13.70
   3  -9  -6   93.29    8.00
  -9  -3  -6   82.69    4.40
   9   3  -6   89.29    6.00
   3  -9  -6   84.49   13.30
  -3   9  -6   86.29    4.40
  -3   9   6   89.69    5.70
   9   3   6   84.19    4.40
   3  -9   6   87.69   11.30
  -9  -3   6   98.89    8.90
   3  -9   6   82.29    4.60
   9   2  -6   21.10    4.70
  -9  -2  -6   26.30    1.90
  -9  -2  -6   36.30    8.70
  -2   9  -6   28.70    2.30
   9   2  -6   38.90    3.90
   2  -9  -6   21.10    4.40
   2  -9  -6   32.30    9.70
   9   2   6   23.70    1.80
  -2   9   6   23.30    3.00
  -9  -2   6   33.60    5.90
   2  -9   6   39.10    8.10
   1  -9  -6   10.80    4.00
   9   1  -6    9.00    3.50
   9   1  -6    7.20    2.30
  -9  -1  -6   14.70    6.30
  -9  -1  -6   10.80    1.00
  -9  -1   6   11.00    4.00
  -1   9   6   14.90    4.10
   1  -9   6   12.40    5.10
  -1   9   6    7.10    2.20
   9   1   6   10.90    1.30
   0   9  -6   51.99    3.60
  -9   0  -6   83.89   13.00
   9   0  -6   56.29    5.60
   0  -9  -6   58.89    7.70
   9   0  -6   43.90    4.30
  -9   0   6   43.00    6.60
   0  -9   6   55.49    8.50
   0   9   6   52.99    4.10
   9  -1  -6   11.50    3.00
  -1  -9  -6   15.30    4.90
   1   9  -6   13.40    2.00
  -9   1  -6    4.20    6.90
   9  -1  -6   12.40    2.80
   1   9   6   10.60    2.10
  -1  -9   6   11.70    5.30
  -9   1   6    5.80    4.30
  -2  -9  -6   26.70    5.90
   9  -2  -6   25.40    3.60
  -9   2  -6   10.50    8.80
   2   9  -6   22.80    2.60
   9  -2  -6   27.70    3.40
   2   9   6   22.10    2.70
  -2  -9   6   29.10    6.80
  -9   2   6   25.40    6.20
   3   9  -6   94.89    5.30
   9  -3  -6   78.89    6.00
  -3  -9  -6   83.39   10.70
  -9   3  -6   76.19   16.00
   9  -3  -6   82.99    5.90
   3   9   6   79.59    5.20
  -3  -9   6   75.59   10.10
   9  -4  -6  120.89    7.90
   9  -4  -6  135.99    8.10
  -9   4  -6  138.59   20.60
  -4  -9  -6  112.49   12.20
   9  -4  -6  130.29    8.50
   4   9  -6  137.49    7.40
  -4  -9   6  146.39   12.50
   4   9   6  141.49    7.30
  -5  -9  -6   -3.30    3.80
   5   9  -6    0.60    1.80
   9  -5  -6    1.40    2.30
   9  -5  -6    3.90    2.30
   9  -5  -6    1.90    2.10
  -9   5  -6    6.50    9.80
  -5  -9   6   -3.80    3.90
   5   9   6   -0.30    1.70
   6   9  -6   16.20    2.80
  -6  -9  -6   13.00    5.40
   9  -6  -6   24.00    4.00
   9  -6  -6   13.30    3.30
   6   9   6   17.70    2.60
  -6  -9   6   15.70    5.70
  -7  -9  -6    4.40    5.40
   7   9  -6    3.10    2.50
  -9   7  -6    6.30    8.80
   9  -7  -6    5.80    2.90
   9  -7  -6    8.10    3.20
   7   9   6    2.50    1.90
  -7  -9   6    7.20    5.00
   9  -8  -6   -3.10    2.70
  -8  -9  -6   -0.90    4.90
   8   9  -6    0.70    2.20
   9  -8  -6    1.00    2.60
  -9   8  -6    2.30   11.30
   9  -8   6   -6.50    5.70
   8   9   6    4.60    2.00
  -8  -9   6   -1.70    4.90
   9  -9  -6    6.80    3.90
   9   9  -6   11.90    2.90
   9  -9  -6    5.80    3.10
  -9  -9  -6   21.80    8.70
   9   9   6   11.60    3.60
  -9  -9   6   14.60    6.40
   9  -9   6   13.60    7.20
  10   9  -6  102.59    7.40
   9 -10  -6  118.19    8.00
 -10  -9  -6   94.79   16.30
   9 -10   6   90.89   15.00
  10   9   6  116.49    6.60
   8 -10  -6   -2.20    3.40
  10   8  -6   -3.90    2.10
 -10  -8  -6    1.40    6.80
   8 -10  -6   -1.80    2.50
 -10  -8   6   -0.50    5.10
   8 -10   6   -1.30    6.10
  10   8   6   -0.90    1.70
   7 -10  -6    2.30    2.20
   7 -10  -6    3.50    3.80
  10   7  -6   11.40    3.10
 -10  -7  -6    2.00    6.60
  10   7   6    4.30    1.70
 -10  -7   6   -1.40    4.60
   7 -10   6   20.30    7.10
   6 -10  -6    8.40    2.80
 -10  -6  -6    4.70    6.20
   6 -10  -6    6.90    3.60
  10   6  -6    5.40    2.60
 -10  -6   6    3.50    4.40
   6 -10   6   13.10    7.40
  10   6   6    6.10    1.80
  -5  10  -6   13.50    1.30
   5 -10  -6   23.10    8.40
 -10  -5  -6   16.30    7.30
   5 -10  -6   14.90    3.10
  10   5  -6   11.00    2.90
   5 -10  -6    9.00    4.10
   5 -10   6   12.70    6.50
 -10  -5   6   15.30    5.70
  10   5   6   15.80    2.00
  -5  10   6    9.90    2.60
   5 -10   6   12.30    1.60
  10   4  -6   22.80    3.60
  -4  10  -6   26.80    2.20
   4 -10  -6   34.20    5.70
 -10  -4  -6   24.60    8.90
   4 -10  -6   30.30   10.10
   4 -10   6   27.40    7.30
  10   4   6   27.10    2.30
 -10  -4   6   23.40    5.80
  -4  10   6   25.90    3.40
   4 -10   6   28.40    2.50
   3 -10  -6  288.17   17.50
 -10  -3  -6  315.07   13.10
  -3  10  -6  316.37   13.10
  10   3  -6  270.27   14.60
 -10  -3  -6  335.27   25.20
  10   3   6  304.97   13.00
  -3  10   6  302.37   14.50
   3 -10   6  276.37   20.90
 -10  -2  -6    4.50    1.00
   2 -10  -6    2.60    3.70
 -10  -2  -6    2.40    7.30
  10   2  -6    7.20    2.40
  -2  10  -6    4.90    1.40
  -2  10   6    5.20    2.00
  10   2   6    6.10    1.00
   2 -10   6    3.90    5.20
 -10  -2   6    9.40    3.70
  10   1  -6    4.50    3.40
  -1  10  -6   -1.60    1.10
 -10  -1  -6    0.10    5.20
  10   1  -6    0.40    2.00
   1 -10  -6   -2.10    3.20
 -10  -1  -6    0.70    0.50
   1 -10   6   -1.60    3.30
  10   1   6    0.90    0.50
  -1  10   6   -0.80    1.80
 -10  -1   6    6.90    3.70
 -10   0  -6   13.00    6.90
   0  10  -6   21.20    2.40
   0 -10  -6   32.50    6.50
  10   0  -6   23.30    3.40
   0  10   6   19.20    2.90
 -10   0   6   23.20    5.70
   0 -10   6   17.80    5.50
  10  -1  -6    0.80    2.00
  -1 -10  -6   -3.30    3.40
  10  -1  -6   -1.40    2.60
 -10   1  -6   -8.90    5.50
   1  10  -6    0.90    1.50
  -1 -10   6   -0.10    4.50
 -10   1   6    3.50    4.40
   1  10   6    1.20    1.90
 -10   2  -6   10.80    7.60
  -2 -10  -6    5.70    4.50
   2  10  -6    6.80    2.00
  10  -2  -6    5.20    2.50
  10  -2  -6    8.90    3.10
  -2 -10   6    6.60    4.20
   2  10   6    5.40    2.00
 -10   2   6    5.30    6.00
  -3 -10  -6  313.17   20.70
 -10   3  -6  260.97   28.00
  10  -3  -6  296.17   15.90
  10  -3  -6  300.97   14.90
   3  10  -6  313.87   14.10
  -3 -10   6  299.37   20.40
 -10   3   6  325.17   21.70
   3  10   6  317.47   14.30
   4  10  -6   21.50    2.90
  10  -4  -6   25.50    5.80
  10  -4  -6   27.40    4.30
  -4 -10  -6   40.90    8.20
 -10   4  -6    6.40   13.30
  10  -4  -6   23.10    4.10
  -4 -10   6   13.40    6.40
   4  10   6   31.40    3.30
  -5 -10  -6    3.50    4.90
   5  10  -6   16.90    2.70
  10  -5  -6   12.00    3.60
  10  -5  -6   14.60    3.50
  10  -5  -6   10.20    2.90
 -10   5  -6    8.00    8.40
  -5 -10   6    5.30    5.50
   5  10   6   10.40    2.30
  10  -6  -6    7.10    2.90
  10  -6  -6   14.40    3.70
  -6 -10  -6   11.10    6.50
   6  10  -6    9.60    2.60
 -10   6  -6   13.80   12.20
   6  10   6    8.50    3.40
  -6 -10   6    7.70    5.40
  10  -7  -6    6.10    2.90
 -10   7  -6    0.50    8.90
   7  10  -6    8.20    2.50
  10  -7  -6    5.60    3.70
   7  10   6   -0.40    1.90
  -7 -10   6    7.40    5.30
  10  -8  -6   -5.30    2.60
   8  10  -6   -3.60    2.30
 -10   8  -6   22.00   16.20
  10  -8  -6    1.20    3.50
  -8 -10  -6   -8.60    4.30
   8  10   6   -1.40    1.70
  -8 -10   6    7.70    5.70
  10  -8   6    2.20    5.70
  10  -9  -6  127.39    8.30
   9  10  -6  111.39    7.50
  -9 -10  -6  101.19   15.90
  10  -9  -6  112.39   10.00
  -9 -10   6   83.49   12.60
  10  -9   6  103.99   15.90
   9  10   6  126.29    7.00
  10  10  -6   25.00    4.10
 -10 -10  -6   37.60   11.20
  10 -10  -6   27.60    4.70
  10 -10  -6   40.00    8.50
 -10 -10   6   33.10    8.60
  10 -10   6   24.60    9.80
  10  10   6   30.20    3.50
  10 -11  -6   13.60    3.80
 -11 -10  -6   -5.10    7.80
  11  10  -6   17.40    3.70
  10 -11   6   15.30    9.40
 -11 -10   6   13.70    7.20
  11  10   6   18.20    3.00
   9 -11  -6    5.20    4.40
   9 -11  -6    3.60    3.20
 -11  -9  -6    2.60    8.60
  11   9  -6    3.50    3.00
  11   9   6    3.10    2.10
 -11  -9   6    1.30    6.40
   9 -11   6   17.80    9.50
   8 -11  -6   68.29    8.90
  11   8  -6   80.29    6.30
 -11  -8  -6   98.59   15.70
   8 -11  -6   74.09    6.50
  11   8   6   81.29    5.20
 -11  -8   6   63.09   10.90
   8 -11   6   93.39   15.10
 -11  -7  -6  -10.00    7.40
  11   7  -6   -1.00    2.40
   7 -11  -6    1.20    2.60
   7 -11  -6   -4.90    3.90
  11   7   6    2.10    1.60
 -11  -7   6   13.80    5.70
   7 -11   6    1.10    6.40
 -11  -6  -6   12.60    7.20
   6 -11  -6    5.70    4.20
  -6  11  -6    7.70    1.10
   6 -11  -6    7.90    2.90
  11   6  -6    5.80    2.70
  11   6   6    9.70    1.90
 -11  -6   6    6.20    5.00
   6 -11   6   -0.80    5.90
  11   5  -6    6.70    2.70
 -11  -5  -6   16.50    9.40
   5 -11  -6    3.40    3.80
  -5  11  -6    7.60    1.30
  -5  11   6    5.20    2.50
  11   5   6    6.90    1.70
 -11  -5   6    6.10    4.90
   5 -11   6   25.70    8.30
   4 -11  -6   54.89    7.90
  -4  11  -6   65.89    3.70
 -11  -4  -6   38.50   11.40
  11   4  -6   63.59    5.50
   4 -11   6   44.60    9.60
  -4  11   6   60.79    5.10
 -11  -4   6   75.09    9.70
  11   4   6   65.89    3.80
 -11  -3  -6    0.20    1.20
 -11  -3  -6   -4.60    6.80
  -3  11  -6    1.10    1.20
  11   3  -6    5.00    2.50
   3 -11  -6    5.00    4.00
 -11  -3   6    2.90    4.40
  11   3   6    2.10    1.10
   3 -11   6   -0.50    4.00
  -3  11   6    1.00    2.10
   2 -11  -6  137.09   11.50
 -11  -2  -6  122.59   22.00
 -11  -2  -6  141.79    6.30
  -2  11  -6  145.99    6.90
  11   2  -6  137.19    8.40
 -11  -2   6  134.69   12.50
  11   2   6  135.79    6.20
  -2  11   6  136.29    7.90
   1 -11  -6    8.70    4.70
  11   1  -6   -0.70    2.30
  -1  11  -6    1.70    1.50
  -1  11   6    3.10    2.20
   1 -11   6   -1.90    4.40
 -11  -1   6    8.00    5.70
   0  11  -6   12.80    2.20
  11   0  -6   13.80    3.20
  11   0  -6   12.80    4.70
   0 -11  -6   17.40    5.70
   0 -11   6    8.10    5.20
 -11   0   6   14.20    5.70
   0  11   6   13.40    2.70
  11  -1  -6    6.30    3.80
 -11   1  -6  -10.60    6.50
  11  -1  -6    4.10    2.50
   1  11  -6    2.60    1.80
  -1 -11  -6    3.00    4.50
  -1 -11   6    2.40    4.70
 -11   1   6    4.70    5.80
   1  11   6    2.30    2.00
  -2 -11  -6  129.19   12.50
 -11   2  -6  127.19   21.00
  11  -2  -6  112.79   10.00
  11  -2  -6  131.89    8.20
   2  11  -6  139.49    7.20
 -11   2   6  150.48   14.80
   2  11   6  138.09    7.60
  -2 -11   6  141.29   13.70
  -3 -11  -6    0.50    4.00
 -11   3  -6   -7.00    6.50
  11  -3  -6    3.70    2.60
   3  11  -6    0.90    1.80
   3  11   6    0.60    1.80
 -11   3   6    1.60    6.90
  -3 -11   6    3.00    5.00
  11  -4  -6   63.29    5.50
 -11   4  -6   39.90   14.20
  -4 -11  -6   56.59   10.00
  11  -4  -6   46.10    6.20
   4  11  -6   62.79    5.10
  -4 -11   6   65.99   10.60
   4  11   6   66.39    4.80
  11  -5  -6    5.80    2.70
  -5 -11  -6   12.90    6.60
 -11   5  -6   -3.00    9.70
   5  11  -6    4.10    2.20
  11  -5  -6    2.60    3.30
   5  11   6    5.00    2.30
  -5 -11   6   -2.80    6.30
   6  11  -6    7.30    2.40
  11  -6  -6    7.90    3.20
  -6 -11  -6   -0.80    5.60
  11  -6  -6    6.20    3.80
 -11   6  -6    9.10   12.40
   6  11   6    8.60    2.40
  -6 -11   6    4.90    5.30
  11  -7  -6    1.10    2.90
  11  -7  -6    6.70    4.20
   7  11  -6    1.70    2.20
  -7 -11  -6    2.30    5.80
 -11   7  -6    7.40   14.10
  -7 -11   6   11.60    6.10
   7  11   6   -0.80    2.00
  -8 -11  -6   60.99   11.60
 -11   8  -6   68.49   19.80
  11  -8  -6   64.39    8.20
   8  11  -6   73.49    5.80
  -8 -11   6   82.09   12.30
   8  11   6   75.89    5.40
  11  -9  -6    5.60    3.10
   9  11  -6    1.80    2.70
  -9 -11  -6    9.30    8.10
  11  -9   6    0.10    6.70
   9  11   6    5.00    2.20
  -9 -11   6   21.70    6.70
 -10 -11  -6   23.50   10.00
  11 -10  -6    7.70    3.40
  10  11  -6   14.20    3.90
 -10 -11   6    8.70    6.90
  10  11   6   11.50    2.60
  11 -10   6   19.70    9.50
   9 -12  -6    9.40    4.30
 -12  -9  -6    5.00   10.60
  12   9  -6    4.80    3.10
   9 -12   6    7.10    8.20
  12   9   6    5.30    2.20
 -12  -9   6    1.30    7.20
   8 -12  -6   10.10    3.00
   8 -12  -6   -0.70    4.90
 -12  -8  -6   -0.80    8.20
  12   8  -6    2.10    2.80
   8 -12   6    5.60    6.90
 -12  -8   6   11.90    7.30
  12   8   6    1.40    2.00
   7 -12  -6   50.89    8.80
 -12  -7  -6   56.49   13.10
  12   7  -6   70.19    6.00
   7 -12  -6   59.59    5.90
 -12  -7   6   60.89   10.50
   7 -12   6   66.39   12.80
  12   7   6   63.59    4.50
   6 -12  -6    9.40    3.20
  -6  12  -6   10.80    1.40
  12   6  -6    4.30    2.90
 -12  -6  -6   16.40    9.00
   6 -12  -6    7.50    5.10
   6 -12   6   -1.40    6.30
 -12  -6   6    9.70    6.20
  -6  12   6    8.40    2.90
  12   6   6   13.80    2.20
   5 -12  -6    0.60    4.30
  12   5  -6   10.90    3.10
  -5  12  -6    1.60    1.20
 -12  -5  -6    7.90    9.10
 -12  -5   6    5.60    5.50
  12   5   6    3.40    1.50
   5 -12   6    2.80    6.80
  -5  12   6    3.80    2.60
   4 -12  -6   -6.10    4.10
 -12  -4  -6    3.70    6.20
  -4  12  -6    3.10    1.30
  12   4  -6    1.30    2.40
   4 -12   6   14.40    7.00
 -12  -4   6   -1.20    5.20
  12   4   6    0.50    1.70
  -4  12   6    2.40    2.40
  -3  12  -6    9.30    1.70
 -12  -3  -6   25.20   10.20
  12   3  -6    7.60    2.90
   3 -12  -6   10.40    5.30
  -3  12   6    8.70    2.80
   3 -12   6   14.00    6.20
 -12  -3   6    2.10    5.40
  12   3   6   12.10    1.40
  12   2  -6   -1.30    2.40
  -2  12  -6    1.60    1.40
   2 -12  -6   -1.70    4.60
 -12  -2  -6   -0.40    7.10
 -12  -2   6   -3.90    4.40
   2 -12   6    8.20    5.40
  -2  12   6    5.60    2.50
  12   2   6   -0.10    0.70
  -1  12  -6   37.60    3.30
   1 -12  -6   41.10    7.60
 -12  -1  -6   40.80   12.30
  12   1  -6   38.30    4.40
 -12  -1   6   36.10    8.70
  -1  12   6   33.70    3.90
   1 -12   6   42.80    9.50
   0  12  -6   21.80    2.60
   0 -12  -6   18.70    6.50
  12   0  -6   21.40    3.80
 -12   0  -6   19.20    9.50
   0 -12   6   30.80    8.80
   0  12   6   26.30    3.40
  12  -1  -6   46.80    4.80
  -1 -12  -6   37.30    7.80
 -12   1  -6   31.90   12.60
   1  12  -6   39.70    3.60
  -1 -12   6   39.20    9.00
 -12   1   6   30.30    8.70
   1  12   6   33.80    3.90
   2  12  -6    1.60    1.90
  -2 -12  -6   -1.50    4.60
 -12   2  -6    0.30    7.20
  12  -2  -6    1.00    2.70
  -2 -12   6    2.90    5.60
   2  12   6    0.10    1.90
 -12   2   6    7.30    8.30
  12  -3  -6   10.50    3.10
   3  12  -6   13.00    2.60
 -12   3  -6    4.60    8.70
  -3 -12  -6   13.70    6.40
 -12   3   6   30.70    9.30
  -3 -12   6    4.90    5.40
   3  12   6    9.60    2.70
  12  -4  -6    0.20    2.50
   4  12  -6    2.70    2.10
  -4 -12  -6    2.90    5.80
 -12   4  -6    1.60   10.70
  -4 -12   6    8.10    5.40
   4  12   6    2.20    2.20
   5  12  -6    2.50    2.30
  12  -5  -6    4.30    2.80
 -12   5  -6   -0.60    9.30
  -5 -12  -6   -1.20    6.30
  12  -5  -6    7.10    3.90
  -5 -12   6    3.00    6.70
   5  12   6    7.60    2.60
 -12   6  -6   17.30   15.00
  12  -6  -6    7.30    4.60
   6  12  -6    2.50    2.40
  -6 -12  -6    2.60    7.10
  12  -6  -6    7.70    3.30
   6  12   6    8.80    2.70
  -6 -12   6    5.90    6.40
 -12   7  -6   41.20   19.00
  -7 -12  -6   73.99   12.30
   7  12  -6   61.69    5.30
  12  -7  -6   69.39    6.30
  -7 -12   6   39.60    9.20
   7  12   6   65.59    5.30
  12  -8  -6    1.20    3.20
   8  12  -6    3.60    2.70
 -12   8  -6   14.10   16.80
  -8 -12  -6   -6.70    6.80
  -8 -12   6   -1.10    6.20
   8  12   6    2.90    2.50
  -9 -12  -6    0.60    7.20
  12  -9  -6    2.10    3.00
   9  12  -6    4.10    2.80
  -9 -12   6    8.10    7.90
  12  -9   6    7.70    8.70
   9  12   6    7.30    2.60
   7 -13  -6    4.60    6.00
 -13  -7  -6   20.80   10.10
   7 -13  -6   21.60    4.00
  13   7  -6   20.40    6.90
  13   7   6   19.10    2.60
 -13  -7   6   29.90    9.40
   6 -13  -6  107.49    7.80
  13   6  -6  104.59    7.90
   6 -13  -6  107.19   12.60
 -13  -6  -6  128.49   18.90
 -13  -6   6  101.89   14.10
  13   6   6  116.89    6.30
  -6  13   6  128.09    7.90
   6 -13   6  109.19   15.40
  13   5  -6    1.30    2.80
 -13  -5  -6   -1.40    8.10
  -5  13  -6    3.10    1.40
   5 -13  -6  -10.30    4.90
  13   5   6    2.10    1.60
  -5  13   6    3.50    2.60
 -13  -5   6    9.60    7.10
   5 -13   6   10.90    7.60
  -4  13  -6    0.60    1.40
   4 -13  -6   -4.20    4.80
 -13  -4  -6   -0.20    7.20
  13   4  -6    1.90    2.70
 -13  -4   6   -3.30    6.40
  13   4   6    1.90    1.30
   4 -13   6    3.10    6.40
  -4  13   6    2.10    2.60
 -13  -3  -6   12.70    8.90
   3 -13  -6   -1.70    5.00
  -3  13  -6    4.80    1.60
  13   3  -6    4.60    2.70
 -13  -3   6   11.60    7.20
  13   3   6    6.10    1.20
   3 -13   6   -0.10    5.80
  -3  13   6    6.50    2.90
 -13  -2  -6    1.00    7.20
  13   2  -6    2.90    2.80
  -2  13  -6   -0.20    1.50
   2 -13  -6   10.70    5.80
 -13  -2   6   -2.00    5.40
   2 -13   6    1.60    5.50
  -2  13   6   -0.60    2.40
 -13  -1  -6   10.30    9.90
   1 -13  -6    7.80    5.20
  13   1  -6   15.40    3.50
  -1  13  -6   11.40    2.10
 -13  -1   6   11.90    6.20
   1 -13   6    2.00    5.50
  -1  13   6    6.90    2.60
   0  13  -6  188.98    9.30
  13   0  -6  178.18   10.50
   0 -13  -6  199.48   16.50
 -13   0  -6  140.09   22.70
 -13   0   6  209.18   18.70
   0  13   6  184.18   10.10
   0 -13   6  201.58   18.10
  13  -1  -6    9.90    3.00
  -1 -13  -6    9.30    6.50
 -13   1  -6   -7.30    7.90
   1  13   6   16.20    3.00
 -13   1   6   11.30    7.60
  -1 -13   6   15.70    6.80
 -13   2  -6    6.20    9.00
  -2 -13  -6   -2.00    5.40
   2  13  -6   -1.30    1.80
  13  -2  -6    0.50    2.60
  -2 -13   6   -4.10    4.70
   2  13   6    5.60    2.50
 -13   2   6    6.10    9.40
  13  -3  -6    7.40    3.10
 -13   3  -6   -7.70   10.50
   3  13  -6    3.70    2.30
  -3 -13  -6   -0.50    5.50
   3  13   6    2.20    2.50
  -3 -13   6   12.40    7.00
 -13   3   6    6.80   13.10
  13  -4  -6    1.80    3.00
  -4 -13  -6    1.90    5.30
   4  13  -6   -1.30    2.20
 -13   4  -6  -16.60   10.60
  -4 -13   6   -1.90    4.90
   4  13   6    2.70    2.50
  13  -5  -6   -0.40    4.10
  13  -5  -6    0.00    2.70
   5  13  -6   -0.60    2.20
 -13   5  -6    2.50   12.10
  -5 -13  -6    0.20    6.30
   5  13   6    4.40    2.40
  -5 -13   6    1.60    5.90
 -13   6  -6   59.79   20.20
   6  13  -6  129.09    7.40
  13  -6  -6  105.09    8.20
  -6 -13  -6   63.99   13.40
   6  13   6  121.19    7.30
  -6 -13   6  114.49   15.10
 -13   7  -6   28.90   32.80
   7  13  -6   17.90    3.20
  -7 -13  -6   13.10    8.50
  13  -7  -6   22.00    4.10
   7  13   6   16.00    3.20
  -7 -13   6   11.90    7.80
  14   6  -6    7.00    3.30
 -14  -6  -6    0.50   10.30
   6 -14  -6    6.30    3.00
   6 -14  -6    9.00    6.90
   6 -14   6   15.90    8.70
  -6  14   6    7.60    3.00
 -14  -6   6   12.80    8.10
  14   5  -6   43.40    8.30
   5 -14  -6   41.90    9.20
  -5  14   6   60.79    8.50
   5 -14   6   36.20   17.60
 -14  -5   6   50.99   11.30
 -14  -4  -6   -2.70   10.10
  -4  14  -6    1.80    1.60
   4 -14  -6    0.80    5.50
  14   4  -6    3.40    2.90
   4 -14   6   -1.70    7.50
 -14  -4   6    7.20    8.20
  -4  14   6   -1.70    2.40
  14   3  -6    9.20    3.30
   3 -14  -6    9.20    6.70
 -14  -3  -6    4.10    9.40
  -3  14  -6    8.50    1.90
 -14  -3   6    5.70    7.30
  -3  14   6    7.90    3.00
   3 -14   6   11.10    6.90
  -2  14  -6    0.00    1.70
 -14  -2  -6   -3.60    9.40
  14   2  -6    3.80    3.10
   2 -14  -6   -0.70    5.70
   2 -14   6    6.00    5.40
 -14  -2   6    0.30    7.10
  -2  14   6    0.40    2.50
  -1  14  -6   45.70    4.20
  14   1  -6   52.99    5.70
 -14  -1  -6   60.39   16.00
   1 -14  -6   55.19   10.50
  -1  14   6   42.30    4.80
 -14  -1   6   52.69   11.00
   1 -14   6   57.19   10.20
   0  14  -6    5.80    2.00
 -14   0  -6   -8.10   10.40
  14   0  -6   11.10    3.10
   0 -14   6    7.40    6.80
 -14   0   6   -5.10    9.10
   0  14   6    8.30    2.70
 -14   1  -6   32.80   13.90
   1  14  -6   48.70    4.20
  14  -1  -6   51.69    5.40
  -1 -14  -6   37.40    8.50
 -14   1   6   56.79   13.90
   1  14   6   54.19    5.00
  -1 -14   6   34.10    9.40
 -14   2  -6    8.50   12.20
   2  14  -6    0.40    2.10
  14  -2  -6    0.80    3.00
  -2 -14  -6    5.60    6.60
  -2 -14   6    3.30    6.60
   2  14   6    0.90    2.40
 -14   2   6    3.80   12.00
   3  14  -6    4.90    2.30
  14  -3  -6    8.10    3.60
  -3 -14  -6    6.50    7.00
 -14   3  -6   11.60   14.00
   3  14   6    8.40    2.90
 -14   3   6   12.30   14.00
  -3 -14   6    1.90    6.80
  14  -4  -6    2.60    3.10
  -4 -14  -6    5.60    6.70
   4  14  -6    0.20    2.30
 -14   4  -6    6.40   13.00
   4  14   6    0.10    2.30
  -4 -14   6    2.50    7.10
 -14   4   6    5.40   16.70
   5  14  -6   50.29    4.70
  -5 -14  -6   44.60   10.10
 -14   5  -6   24.20   17.50
  14  -5  -6   46.60    5.40
   5  14   6   55.89    6.60
  -5 -14   6   39.50   10.70
  -6 -14  -6   -4.10    7.50
   6  14  -6    9.40    4.10
 -14   6  -6    2.20   15.10
  14  -6  -6   -0.50    3.70
  -6 -14   6   -7.20    5.90
   6  14   6   10.70    3.00
 -15  -2  -6   19.20   13.40
  -2  15  -6    6.50    2.10
   2 -15  -6   -0.10    6.30
  15   2  -6    3.80    3.30
   2 -15   6   -2.70    6.40
 -15  -2   6    7.20   10.40
  -2  15   6   15.90    3.50
 -15  -1  -6   14.70   13.20
   1 -15  -6    4.50    6.90
  -1  15  -6   -0.70    1.80
 -15  -1   6   12.80   11.20
  -1  15   6   -1.30    2.50
   1 -15   6    6.60    8.80
 -15   0  -6   -7.30    9.40
   0 -15  -6   -3.00    7.10
   0  15  -6    0.30    2.00
  15   0  -6    5.80    4.90
   0  15   6    4.10    2.70
 -15   0   6    9.50   12.50
 -15   1  -6   10.00   13.30
  15  -1  -6    4.40    3.80
  -1 -15  -6   -5.80    6.50
   1  15  -6    0.40    1.90
 -15   1   6  -12.70   13.20
   1  15   6    4.60    2.80
  15  -2  -6   -0.70    4.70
   2  15  -6    8.00    2.50
 -15   2  -6    3.00   15.40
  -2 -15  -6   12.70    8.30
   2  15   6    4.40    2.80
   0   0  -7   10.40    1.40
   0   0  -7   10.80    1.70
   0   0   7    4.70    1.90
   0   0   7    4.80    1.80
  -1   0  -7  585.64   23.70
   0  -1  -7  497.95   23.70
   0   1  -7  552.94   23.70
   1   0  -7  590.24   24.00
  -1   0  -7  554.04   23.50
   0   1  -7  571.44   23.70
  -1   0  -7  526.85   31.30
   0   1   7  584.84   24.80
   1   0   7  590.04   26.10
   0  -1   7  565.74   25.80
  -1   0   7  538.35   24.00
   0  -1   7  598.14   26.50
   0   1   7  536.05   24.30
  -1   0   7  552.94   24.00
  -1  -1  -7   28.10    5.80
  -1  -1  -7   40.70    2.70
  -1   1  -7   30.90    2.20
   1   1  -7   24.00    2.40
  -1  -1  -7   28.20    2.20
   1  -1  -7   29.30    2.80
  -1   1  -7   26.20    2.30
   1  -1   7   29.80    4.40
  -1  -1   7   27.30    3.60
   1   1   7   30.30    3.60
   1  -1   7   28.50    4.50
  -1  -1   7   27.60    3.30
  -1   2  -7    3.20    1.10
  -2  -1  -7    2.30    0.90
  -1   2  -7    4.90    1.20
  -2  -1  -7   11.60    3.60
   1  -2  -7    3.40    1.40
   2   1  -7    2.80    1.50
  -2  -1  -7    3.90    1.20
   1  -2   7    3.90    2.50
   1  -2   7   -0.70    2.90
  -2  -1   7    1.90    1.20
   2   1   7    3.50    2.10
   0  -2  -7    1.60    2.40
  -2   0  -7    0.60    0.90
  -2   0  -7    3.30    3.60
   0   2  -7    0.70    1.00
   0   2  -7    1.10    0.90
   0  -2  -7    0.20    1.10
  -2   0  -7    0.40    0.90
   2   0  -7   -0.30    1.30
   2   0   7    3.20    2.10
   0  -2   7   -1.40    1.50
   0  -2   7    0.40    2.90
   0   2   7   -0.30    1.20
  -2   1  -7    3.80    1.10
  -1  -2  -7    2.60    1.40
   2  -1  -7    4.70    1.60
  -2   1  -7    3.50    0.90
   1   2  -7    3.40    1.20
  -1  -2  -7    0.10    2.90
  -2   1  -7    3.40    4.00
   2  -1   7    6.80    3.10
  -1  -2   7    3.90    1.90
   1   2   7    3.20    1.60
  -1  -2   7    7.90    3.20
  -2   2  -7    0.40    0.70
  -2   2  -7   -0.60    0.80
  -2  -2  -7    2.10    1.20
  -2  -2  -7   -0.50    0.90
   2  -2  -7    0.20    1.50
  -2  -2  -7    1.70    3.30
  -2   2  -7   -0.20    4.60
   2   2  -7   -0.70    1.30
   2  -2   7    0.80    2.90
  -2  -2   7    0.50    2.80
  -2  -2   7    1.50    1.50
   2   2   7    1.40    2.00
  -2   3  -7  463.95   20.10
  -3  -2  -7  483.35   20.30
  -2   3  -7  462.85   20.10
   2  -3  -7  482.55   20.90
  -3  -2  -7  403.86   26.00
   3   2  -7  509.15   20.80
  -3  -2  -7  464.05   20.10
   2  -3   7  481.05   24.90
  -3  -2   7  466.25   21.60
  -3  -2   7  520.85   24.50
   2  -3   7  550.04   27.60
  -3  -1  -7    4.10    1.20
  -3  -1  -7    4.40    1.20
  -3  -1  -7    2.80    3.90
   1  -3  -7    6.10    1.60
  -1   3  -7    4.60    1.20
   3   1  -7    4.00    1.60
   1  -3   7   11.40    4.30
  -3  -1   7    5.50    1.40
  -3  -1   7    5.50    1.20
   1  -3   7    4.10    2.80
  -3   0  -7  579.64   24.50
   0  -3  -7  529.65   27.50
   0   3  -7  620.44   24.90
   3   0  -7  619.34   25.40
   0  -3  -7  592.74   25.20
  -3   0  -7  588.14   24.60
  -3   0  -7  566.94   33.90
   0   3   7  570.74   25.50
   0  -3   7  635.74   28.40
   0  -3   7  671.83   32.00
   3   0   7  578.84   28.60
   0  -3   7  544.65   24.80
  -3   1  -7    5.30    1.00
  -1  -3  -7    4.10    2.90
   3  -1  -7    3.60    1.60
  -1  -3  -7    7.60    1.60
  -3   1  -7   -1.30    4.30
   1   3  -7    7.00    1.50
  -3   1  -7    4.10    0.80
   1   3   7    3.50    1.80
  -1  -3   7    6.90    2.60
  -1  -3   7    6.50    4.00
   3  -1   7    1.00    3.40
  -3   2  -7  448.66   19.50
  -2  -3  -7  440.76   24.70
  -3   2  -7  459.95   19.60
  -2  -3  -7  506.35   20.20
  -3   2  -7  393.26   30.70
   3  -2  -7  488.65   20.60
  -2  -3   7  498.95   26.90
   3  -2   7  498.15   25.80
  -2  -3   7  465.75   22.30
   2   3   7  473.25   22.20
   2   3   7  456.05   20.10
  -3  -3  -7   23.90    5.70
  -3   3  -7   12.80    8.60
   3  -3  -7   21.90    2.70
  -3   3  -7   21.30    1.60
  -3   3  -7   20.00    1.60
   3   3  -7   22.50    2.60
   3   3   7   16.60    2.00
  -3  -3   7   25.40    3.70
  -3  -3   7   24.80    6.50
  -3   4  -7  315.17   13.50
  -4  -3  -7  300.17   13.70
   4   3  -7  338.77   14.50
  -3   4  -7  313.57   13.50
   3  -4  -7  333.77   14.80
  -4  -3  -7  289.67   19.90
   4   3   7  330.97   14.00
  -4  -3   7  394.56   23.00
   3  -4   7  341.07   20.00
   4   3   7  285.57   17.10
  -4  -3   7  307.07   15.90
  -2   4  -7   15.80    1.60
  -4  -2  -7    9.70    4.70
  -4  -2  -7   13.30    1.40
  -4  -2  -7   17.50    1.80
   4   2  -7   12.60    2.10
  -2   4  -7   14.90    1.50
   2  -4  -7   14.80    2.30
  -4  -2   7   11.60    3.90
  -4  -2   7   15.50    2.60
   4   2   7    8.90    3.10
   2  -4   7   15.60    4.50
  -4  -1  -7    3.00    0.80
   1  -4  -7    2.90    1.60
  -1   4  -7    3.10    1.10
  -4  -1  -7   -0.40    3.20
   4   1  -7    2.90    1.60
  -4  -1  -7    1.80    0.90
  -4  -1   7    2.40    0.80
   1  -4   7    2.20    1.00
   1  -4   7   10.60    5.50
   1  -4   7   -1.80    2.60
   4   1   7    1.90    2.60
  -4  -1   7    2.40    0.80
   0  -4  -7   13.70    2.20
  -4   0  -7   18.70    1.60
  -4   0  -7   15.50    1.30
  -4   0  -7   18.50    6.30
   0   4  -7   15.70    1.90
   4   0  -7   12.30    2.20
   4   0   7   17.30    3.90
   0  -4   7   15.50    1.80
   0  -4   7   29.20    5.10
   0   4   7   20.00    2.40
   0  -4   7   26.20    7.30
  -4   1  -7    0.90    4.50
   1   4  -7    1.40    1.30
   4  -1  -7    3.80    1.80
  -4   1  -7    2.60    0.70
  -4   1  -7    6.40    0.90
  -1  -4  -7    1.60    2.40
   1   4   7    1.10    1.40
  -1  -4   7    1.40    2.40
   1   4   7    4.00    1.70
  -1  -4   7    5.30    5.20
  -4   2  -7   13.50    1.20
  -4   2  -7   14.00    1.10
  -4   2  -7    8.80    6.80
  -2  -4  -7   19.00    4.50
   4  -2  -7   14.70    2.40
   2   4  -7   14.50    2.00
   2   4   7   12.80    3.30
  -2  -4   7   18.70    3.80
   2   4   7   16.00    2.10
  -2  -4   7    4.80    6.10
   4  -3  -7  339.17   14.50
   3   4  -7  296.27   14.00
  -4   3  -7  305.67   12.90
  -4   3  -7  298.07   26.80
  -3  -4  -7  291.87   18.70
  -3  -4   7  345.97   16.80
   3   4   7  273.37   16.20
  -3  -4   7  362.36   24.10
  -4   4  -7   34.70    1.80
  -4   4  -7   29.70   10.70
   4   4  -7   30.60    3.10
  -4   4  -7   34.00    1.80
  -4  -4  -7   35.40    6.90
   4  -4  -7   36.80    3.70
   4   4   7   31.40    2.70
  -4  -4   7   35.30    4.90
  -4  -4   7   49.40    9.90
   4  -5  -7    4.10    1.90
  -4   5  -7    2.60    0.60
  -5  -4  -7    3.10    4.40
  -4   5  -7    3.80    0.60
   5   4  -7    3.70    1.80
  -5  -4   7   -0.40    8.70
   5   4   7    1.80    1.30
  -5  -4   7    0.60    2.10
   4  -5   7   -2.10    3.50
  -3   5  -7    7.70    1.00
   3  -5  -7    8.90    2.10
  -5  -3  -7    7.40    1.30
   5   3  -7    8.90    2.10
  -3   5  -7    7.60    1.00
   5   3   7    5.10    1.30
  -5  -3   7    6.60    2.30
  -5  -3   7    6.40    6.20
   3  -5   7    8.20    4.10
  -5  -2  -7    3.70    1.00
   5   2  -7    0.60    1.70
  -5  -2  -7    3.20    4.80
  -5  -2  -7    4.10    1.10
  -2   5  -7    3.40    1.10
   2  -5  -7    4.50    1.90
  -5  -2   7    3.90    1.70
   5   2   7    3.00    1.10
   2  -5   7    3.30    1.00
   2  -5   7    4.00    3.60
  -5  -2   7    6.80    4.20
   1  -5  -7    2.30    1.60
   1  -5  -7    0.50    1.50
   5   1  -7    2.30    1.70
  -5  -1  -7    1.80    0.90
  -1   5  -7    1.70    1.10
  -5  -1  -7   -2.40    3.80
  -5  -1  -7    1.20    0.70
  -1   5   7   -0.70    1.40
   1  -5   7    0.90    0.90
   1  -5   7    2.60    3.40
   0  -5  -7  356.36   18.80
   0   5  -7  373.16   16.60
   5   0  -7  389.06   17.30
  -5   0  -7  408.76   16.10
  -5   0  -7  378.66   16.00
   0   5   7  390.96   17.80
   0  -5   7  364.96   16.60
   0   5   7  376.36   17.00
   0  -5   7  425.46   21.50
  -5   1  -7    0.60    0.50
  -5   1  -7    1.70    4.80
  -1  -5  -7    1.90    2.60
   1   5  -7   -0.60    1.20
   5  -1  -7    0.70    1.80
   1   5   7    2.30    1.50
  -1  -5   7    2.60    2.50
   1   5   7    2.60    1.80
  -1  -5   7   -0.90    6.20
   5  -2  -7    4.20    1.80
  -5   2  -7    4.10    0.50
   2   5  -7    3.60    1.50
  -5   2  -7    5.60    6.30
  -2  -5  -7    2.40    3.10
  -5   2  -7    3.30    0.40
   2   5   7    3.10    1.50
   2   5   7    0.70    2.10
  -2  -5   7   -6.20    7.20
  -2  -5   7    1.50    2.60
   3   5  -7    4.30    1.70
  -3  -5  -7   12.40    4.00
  -5   3  -7   -1.40    6.20
   5  -3  -7    6.00    2.10
  -3  -5   7   16.40    9.80
   3   5   7    8.40    3.00
   3   5   7    4.40    1.50
  -3  -5   7    7.40    3.20
   4   5  -7    1.40    1.50
  -5   4  -7   -3.20    6.90
  -4  -5  -7    2.90    3.90
   5  -4  -7    2.60    1.90
  -4  -5   7   -1.70    2.60
   4   5   7    1.50    1.30
  -4  -5   7    5.00    8.60
   5  -5  -7    2.70    2.00
  -5   5  -7    7.70    8.70
   5   5  -7    4.40    2.00
  -5  -5  -7    3.40    4.20
   5   5  -7    6.60    4.30
   5  -5   7    1.60    4.30
   5   5   7    2.30    1.40
  -5  -5   7    0.70    2.60
  -5  -5   7   15.10   10.30
  -6  -5  -7  150.68   14.70
   6   5  -7  163.78    8.80
   5  -6  -7  178.78    9.30
   5  -6   7  201.38   15.60
   6   5   7  171.38    8.10
  -6  -5   7  155.98   11.40
  -4   6  -7   15.20    1.20
   4  -6  -7   19.20    2.80
  -6  -4  -7   21.50    6.90
  -4   6  -7   16.90    1.40
   6   4  -7   18.10    2.90
   6   4  -7   17.70    4.60
  -6  -4   7   15.00    3.60
   4  -6   7   20.40    5.70
   6   4   7   18.80    2.00
  -6  -3  -7  251.07   18.80
  -6  -3  -7  245.38   10.70
  -3   6  -7  243.88   10.40
   3  -6  -7  265.07   12.00
   6   3  -7  238.58   14.30
   6   3  -7  242.18   11.70
   6   3   7  248.38   10.80
   3  -6   7  223.98   10.50
   3  -6   7  268.17   17.50
  -6  -3   7  227.58   13.10
  -2   6  -7    2.60    1.00
   2  -6  -7    1.50    1.50
   2  -6  -7    1.10    1.10
   6   2  -7    3.80    1.90
  -6  -2  -7    0.60    0.80
   2  -6  -7    1.50    1.80
  -6  -2  -7   -3.30    4.10
   2  -6   7    1.10    0.90
   2  -6   7    2.30    3.60
   6   2   7    1.60    1.00
  -6  -2   7   -1.60    5.30
  -6  -2   7    1.50    1.70
  -2   6   7    0.50    1.60
  -6  -1  -7  262.27   11.30
  -6  -1  -7  252.17   20.90
  -6  -1  -7  276.27   11.40
  -1   6  -7  262.47   11.70
   1  -6  -7  233.68   13.20
   6   1  -7  274.77   12.80
   1  -6   7  287.57   17.50
  -1   6   7  266.07   12.50
  -6  -1   7  312.27   14.30
   1  -6   7  254.47   11.90
  -6  -1   7  267.77   12.30
  -6   0  -7   34.60    1.80
   0  -6  -7   35.10    4.60
   6   0  -7   30.20    3.40
  -6   0  -7   20.10    7.90
  -6   0  -7   33.30    2.00
   0   6  -7   31.90    2.70
   0   6   7   35.10    3.30
   0  -6   7   38.70    6.20
   0   6   7   37.10    4.20
[truncated: 104,834 more chars]
