# Supplementary material for: Selenium(IV) Polybromide Complexes: Structural Diversity Driven by Halogen and Chalcogen Bonding
Source: Molecules. 2022 Aug 22;27(16):5355. doi: 10.3390/molecules27165355 (PMC9415170; doi:10.3390/molecules27165355)
Supplement: Supplementary file 1 [file molecules-27-05355-s001.zip › 4.cif]

data_4

_audit_creation_method           SHELXL-2017/1
_shelx_SHELXL_version_number     2017/1
_chemical_name_systematic        ?
_chemical_name_common            ?
_chemical_melting_point          ?
_chemical_formula_moiety         ?
_chemical_formula_sum            'C12 H16 Br8 N2 Se'
_chemical_formula_weight         906.51

loop_
_atom_type_symbol
_atom_type_description
_atom_type_scat_dispersion_real
_atom_type_scat_dispersion_imag
_atom_type_scat_source
C C 0.0033 0.0016 'International Tables Vol C Tables 4.2.6.8 and 6.1.1.4'
H H 0.0000 0.0000 'International Tables Vol C Tables 4.2.6.8 and 6.1.1.4'
N N 0.0061 0.0033 'International Tables Vol C Tables 4.2.6.8 and 6.1.1.4'
Se Se -0.0929 2.2259 'International Tables Vol C Tables 4.2.6.8 and 6.1.1.4'
Br Br -0.2901 2.4595 'International Tables Vol C Tables 4.2.6.8 and 6.1.1.4'

_space_group_crystal_system      tetragonal
_space_group_IT_number           92
_space_group_name_H-M_alt        'P 41 21 2'
_space_group_name_Hall           'P 4abw 2nw'

_shelx_space_group_comment       
;
The symmetry employed for this shelxl refinement is uniquely defined
by the following loop, which should always be used as a source of
symmetry information in preference to the above space-group names.
They are only intended as comments.
;

loop_
_space_group_symop_operation_xyz
'x, y, z'
'-x, -y, z+1/2'
'-y+1/2, x+1/2, z+1/4'
'y+1/2, -x+1/2, z+3/4'
'-x+1/2, y+1/2, -z+1/4'
'x+1/2, -y+1/2, -z+3/4'
'y, x, -z'
'-y, -x, -z+1/2'

_cell_length_a                   9.3744(4)
_cell_length_b                   9.3744(4)
_cell_length_c                   25.5866(13)
_cell_angle_alpha                90
_cell_angle_beta                 90
_cell_angle_gamma                90
_cell_volume                     2248.5(2)
_cell_formula_units_Z            4
_cell_measurement_temperature    150(2)
_cell_measurement_reflns_used    9858
_cell_measurement_theta_min      2.6937
_cell_measurement_theta_max      27.8529

_exptl_crystal_description       prism
_exptl_crystal_colour            dark-red
_exptl_crystal_density_meas      ?
_exptl_crystal_density_method    ?
_exptl_crystal_density_diffrn    2.678
_exptl_crystal_F_000             1664
_exptl_transmission_factor_min   ?
_exptl_transmission_factor_max   ?
_exptl_crystal_size_max          0.090
_exptl_crystal_size_mid          0.080
_exptl_crystal_size_min          0.060
_exptl_absorpt_coefficient_mu    15.885
_shelx_estimated_absorpt_T_min   0.329
_shelx_estimated_absorpt_T_max   0.449
_exptl_absorpt_correction_type   multi-scan
_exptl_absorpt_correction_T_min  0.5767
_exptl_absorpt_correction_T_max  0.7456
_exptl_absorpt_process_details   
;
 SADABS 2016/2: Krause, L., Herbst-Irmer, R., Sheldrick G.M. & Stalke D.,
 J. Appl. Cryst. 48 (2015) 3-10
;
_exptl_absorpt_special_details   ?
_diffrn_ambient_temperature      150(2)
_diffrn_radiation_wavelength     0.71073
_diffrn_radiation_type           MoK\a
_diffrn_source                   'Incoatec IuS3.0 microfocus X-ray tube'
_diffrn_measurement_device_type  'Bruker D8 Venture diffractometer'
_diffrn_measurement_method       '\w and \f scans'
_diffrn_detector_area_resol_mean 7.41
_diffrn_reflns_number            42568
_diffrn_reflns_av_unetI/netI     0.0189
_diffrn_reflns_av_R_equivalents  0.0465
_diffrn_reflns_limit_h_min       -12
_diffrn_reflns_limit_h_max       12
_diffrn_reflns_limit_k_min       -12
_diffrn_reflns_limit_k_max       12
_diffrn_reflns_limit_l_min       -33
_diffrn_reflns_limit_l_max       33
_diffrn_reflns_theta_min         2.314
_diffrn_reflns_theta_max         27.912
_diffrn_reflns_theta_full        25.500
_diffrn_measured_fraction_theta_max 0.999
_diffrn_measured_fraction_theta_full 0.999
_diffrn_reflns_Laue_measured_fraction_max 0.999
_diffrn_reflns_Laue_measured_fraction_full 0.999
_diffrn_reflns_point_group_measured_fraction_max 0.997
_diffrn_reflns_point_group_measured_fraction_full 0.999
_reflns_number_total             2694
_reflns_number_gt                2608
_reflns_threshold_expression     'I > 2\s(I)'
_reflns_Friedel_coverage         0.642
_reflns_Friedel_fraction_max     0.995
_reflns_Friedel_fraction_full    0.999

_reflns_special_details          
;
 Reflections were merged by SHELXL according to the crystal
 class for the calculation of statistics and refinement.
 
 _reflns_Friedel_fraction is defined as the number of unique
 Friedel pairs measured divided by the number that would be
 possible theoretically, ignoring centric projections and
 systematic absences.
;
_computing_data_collection       'APEX3 (Bruker-AXS, 2016)'
_computing_cell_refinement       'SAINT (Bruker-AXS, 2016)'
_computing_data_reduction        'SAINT (Bruker-AXS, 2016)'
_computing_structure_solution    'SHELXT 2014/5 (Sheldrick, 2014)'
_computing_structure_refinement  'SHELXL-2017/1 (Sheldrick, 2017)'
_computing_molecular_graphics    ?
_computing_publication_material  ?
_refine_special_details          ?
_refine_ls_structure_factor_coef Fsqd
_refine_ls_matrix_type           full
_refine_ls_weighting_scheme      calc
_refine_ls_weighting_details     
'w=1/[\s^2^(Fo^2^)+1.0761P] where P=(Fo^2^+2Fc^2^)/3'
_atom_sites_solution_primary     ?
_atom_sites_solution_secondary   ?
_atom_sites_solution_hydrogens   geom
_refine_ls_hydrogen_treatment    constr
_refine_ls_extinction_method     none
_refine_ls_extinction_coef       .
_refine_ls_abs_structure_details 
;
 Flack x determined using 1011 quotients [(I+)-(I-)]/[(I+)+(I-)]
 (Parsons, Flack and Wagner, Acta Cryst. B69 (2013) 249-259).
;
_refine_ls_abs_structure_Flack   -0.013(8)
_chemical_absolute_configuration ?
_refine_ls_number_reflns         2694
_refine_ls_number_parameters     106
_refine_ls_number_restraints     0
_refine_ls_R_factor_all          0.0138
_refine_ls_R_factor_gt           0.0128
_refine_ls_wR_factor_ref         0.0256
_refine_ls_wR_factor_gt          0.0255
_refine_ls_goodness_of_fit_ref   1.046
_refine_ls_restrained_S_all      1.046
_refine_ls_shift/su_max          0.003
_refine_ls_shift/su_mean         0.000

loop_
_atom_site_label
_atom_site_type_symbol
_atom_site_fract_x
_atom_site_fract_y
_atom_site_fract_z
_atom_site_U_iso_or_equiv
_atom_site_adp_type
_atom_site_occupancy
_atom_site_site_symmetry_order
_atom_site_calc_flag
_atom_site_refinement_flags_posn
_atom_site_refinement_flags_adp
_atom_site_refinement_flags_occupancy
_atom_site_disorder_assembly
_atom_site_disorder_group
C1 C 0.6254(3) 0.8934(3) 0.68564(12) 0.0283(7) Uani 1 1 d . . . . .
H1A H 0.681387 0.970288 0.669739 0.042 Uiso 1 1 calc R U . . .
H1B H 0.688790 0.814525 0.695192 0.042 Uiso 1 1 calc R U . . .
H1C H 0.577434 0.929369 0.717032 0.042 Uiso 1 1 calc R U . . .
C2 C 0.4187(3) 0.9342(3) 0.63016(11) 0.0257(6) Uani 1 1 d . . . . .
H2 H 0.420020 1.030478 0.641716 0.031 Uiso 1 1 calc R U . . .
C3 C 0.3163(3) 0.8903(4) 0.59567(13) 0.0298(7) Uani 1 1 d . . . . .
H3 H 0.245948 0.955299 0.583533 0.036 Uiso 1 1 calc R U . . .
C4 C 0.3164(3) 0.7500(4) 0.57860(12) 0.0298(7) Uani 1 1 d . . . . .
H4 H 0.246091 0.717463 0.554663 0.036 Uiso 1 1 calc R U . . .
C5 C 0.4198(3) 0.6586(3) 0.59685(11) 0.0274(7) Uani 1 1 d . . . . .
H5 H 0.421654 0.562252 0.585308 0.033 Uiso 1 1 calc R U . . .
C6 C 0.5202(3) 0.7063(3) 0.63168(11) 0.0230(6) Uani 1 1 d . . . . .
H6 H 0.591527 0.643130 0.644328 0.028 Uiso 1 1 calc R U . . .
N1 N 0.5174(3) 0.8423(3) 0.64785(9) 0.0204(5) Uani 1 1 d . . . . .
Se1 Se 0.64251(3) 0.35749(3) 0.750000 0.01501(8) Uani 1 2 d S T P . .
Br1 Br 0.57758(3) 0.29822(3) 0.65481(2) 0.02176(6) Uani 1 1 d . . . . .
Br2 Br 0.44562(3) 0.55438(3) 0.750000 0.02071(8) Uani 1 2 d S T P . .
Br3 Br 0.82627(3) 0.53915(3) 0.71470(2) 0.02181(7) Uani 1 1 d . . . . .
Br4 Br 0.83207(3) 0.16793(3) 0.750000 0.02363(9) Uani 1 2 d S T P . .
Br5 Br 1.07467(4) 0.75404(3) 0.73938(2) 0.03122(8) Uani 1 1 d . . . . .

loop_
_atom_site_aniso_label
_atom_site_aniso_U_11
_atom_site_aniso_U_22
_atom_site_aniso_U_33
_atom_site_aniso_U_23
_atom_site_aniso_U_13
_atom_site_aniso_U_12
C1 0.0266(16) 0.0286(17) 0.0298(16) -0.0070(13) -0.0072(12) 0.0005(13)
C2 0.0254(15) 0.0209(15) 0.0309(16) 0.0028(13) 0.0027(12) 0.0014(12)
C3 0.0228(16) 0.0332(18) 0.0333(17) 0.0050(14) -0.0034(13) 0.0040(14)
C4 0.0236(16) 0.045(2) 0.0210(16) -0.0004(13) -0.0036(12) -0.0077(15)
C5 0.0308(16) 0.0272(16) 0.0241(15) -0.0042(12) 0.0007(13) -0.0051(14)
C6 0.0261(15) 0.0208(15) 0.0220(15) 0.0012(11) 0.0023(12) 0.0009(13)
N1 0.0208(12) 0.0213(13) 0.0190(12) -0.0002(9) 0.0015(9) -0.0009(10)
Se1 0.01452(11) 0.01452(11) 0.01601(17) -0.00088(10) -0.00088(10) -0.00136(13)
Br1 0.02591(15) 0.02274(15) 0.01663(13) -0.00270(10) -0.00253(11) -0.00243(12)
Br2 0.01952(12) 0.01952(12) 0.02308(19) -0.00106(11) -0.00106(11) 0.00285(16)
Br3 0.01924(14) 0.02129(14) 0.02490(14) 0.00127(11) 0.00083(11) -0.00528(11)
Br4 0.02095(13) 0.02095(13) 0.0290(2) -0.00259(12) -0.00259(12) 0.00445(16)
Br5 0.03221(17) 0.03103(17) 0.03041(16) -0.00342(13) -0.00268(13) -0.00241(14)

_geom_special_details            
;
 All esds (except the esd in the dihedral angle between two l.s. planes)
 are estimated using the full covariance matrix.  The cell esds are taken
 into account individually in the estimation of esds in distances, angles
 and torsion angles; correlations between esds in cell parameters are only
 used when they are defined by crystal symmetry.  An approximate (isotropic)
 treatment of cell esds is used for estimating esds involving l.s. planes.
;

loop_
_geom_bond_atom_site_label_1
_geom_bond_atom_site_label_2
_geom_bond_distance
_geom_bond_site_symmetry_2
_geom_bond_publ_flag
C1 N1 1.480(4) . ?
C1 H1A 0.9800 . ?
C1 H1B 0.9800 . ?
C1 H1C 0.9800 . ?
C2 N1 1.343(4) . ?
C2 C3 1.367(4) . ?
C2 H2 0.9500 . ?
C3 C4 1.386(5) . ?
C3 H3 0.9500 . ?
C4 C5 1.376(4) . ?
C4 H4 0.9500 . ?
C5 C6 1.371(4) . ?
C5 H5 0.9500 . ?
C6 N1 1.341(4) . ?
C6 H6 0.9500 . ?
Se1 Br4 2.5130(6) . ?
Se1 Br1 2.5712(3) . ?
Se1 Br1 2.5713(3) 8_666 ?
Se1 Br3 2.5852(3) 8_666 ?
Se1 Br3 2.5852(3) . ?
Se1 Br2 2.6103(5) . ?
Br5 Br5 2.3350(6) 8_776 ?

loop_
_geom_angle_atom_site_label_1
_geom_angle_atom_site_label_2
_geom_angle_atom_site_label_3
_geom_angle
_geom_angle_site_symmetry_1
_geom_angle_site_symmetry_3
_geom_angle_publ_flag
N1 C1 H1A 109.5 . . ?
N1 C1 H1B 109.5 . . ?
H1A C1 H1B 109.5 . . ?
N1 C1 H1C 109.5 . . ?
H1A C1 H1C 109.5 . . ?
H1B C1 H1C 109.5 . . ?
N1 C2 C3 120.6(3) . . ?
N1 C2 H2 119.7 . . ?
C3 C2 H2 119.7 . . ?
C2 C3 C4 119.2(3) . . ?
C2 C3 H3 120.4 . . ?
C4 C3 H3 120.4 . . ?
C5 C4 C3 119.0(3) . . ?
C5 C4 H4 120.5 . . ?
C3 C4 H4 120.5 . . ?
C6 C5 C4 120.1(3) . . ?
C6 C5 H5 120.0 . . ?
C4 C5 H5 120.0 . . ?
N1 C6 C5 119.8(3) . . ?
N1 C6 H6 120.1 . . ?
C5 C6 H6 120.1 . . ?
C6 N1 C2 121.3(3) . . ?
C6 N1 C1 119.8(3) . . ?
C2 N1 C1 118.9(3) . . ?
Br4 Se1 Br1 90.837(11) . . ?
Br4 Se1 Br1 90.837(11) . 8_666 ?
Br1 Se1 Br1 178.33(2) . 8_666 ?
Br4 Se1 Br3 89.694(11) . 8_666 ?
Br1 Se1 Br3 91.779(9) . 8_666 ?
Br1 Se1 Br3 88.230(9) 8_666 8_666 ?
Br4 Se1 Br3 89.693(11) . . ?
Br1 Se1 Br3 88.229(9) . . ?
Br1 Se1 Br3 91.781(9) 8_666 . ?
Br3 Se1 Br3 179.39(2) 8_666 . ?
Br4 Se1 Br2 180.0 . . ?
Br1 Se1 Br2 89.163(11) . . ?
Br1 Se1 Br2 89.163(11) 8_666 . ?
Br3 Se1 Br2 90.306(11) 8_666 . ?
Br3 Se1 Br2 90.307(11) . . ?

_refine_diff_density_max         0.370
_refine_diff_density_min         -0.301
_refine_diff_density_rms         0.058

_shelx_res_file                  
;
TITL 1_a.res in P4(1)2(1)2
    1_a.res
    created by SHELXL-2017/1 at 14:51:17 on 24-May-2022
REM Old TITL 1 in P4(1)2(1)2
REM SHELXT solution in P4(1)2(1)2
REM R1 0.046,  Rweak 0.024,  Alpha 0.001,  Orientation as input
REM Flack x = -0.014 ( 0.010 ) from Parsons' quotients
REM Formula found by SHELXT:  C12 N2 Br9
CELL  0.71073   9.3744   9.3744  25.5866   90.000   90.000   90.000
ZERR    4.000   0.0004   0.0004   0.0013    0.000    0.000    0.000
LATT -1
SYMM -X, -Y, 1/2+Z
SYMM 1/2-Y, 1/2+X, 1/4+Z
SYMM 1/2+Y, 1/2-X, 3/4+Z
SYMM 1/2-X, 1/2+Y, 1/4-Z
SYMM 1/2+X, 1/2-Y, 3/4-Z
SYMM Y, X, -Z
SYMM -Y, -X, 1/2-Z
SFAC C H N SE BR
UNIT 48 64 8 4 32

TEMP -123.150
L.S. 10
BOND $H
LIST 4
OMIT 0
OMIT 0 0 8
FMAP 2
PLAN 20
acta 51
SIZE 0.09 0.08 0.06
WGHT    0.000000    1.076100
FVAR       0.19483
C1    1    0.625368    0.893437    0.685644    11.00000    0.02659    0.02858 =
         0.02979   -0.00697   -0.00716    0.00049
AFIX 133
H1A   2    0.681387    0.970288    0.669739    11.00000   -1.50000
H1B   2    0.688790    0.814525    0.695192    11.00000   -1.50000
H1C   2    0.577434    0.929369    0.717032    11.00000   -1.50000
AFIX   0
C2    1    0.418703    0.934178    0.630162    11.00000    0.02539    0.02091 =
         0.03092    0.00281    0.00272    0.00140
AFIX  43
H2    2    0.420020    1.030478    0.641716    11.00000   -1.20000
AFIX   0
C3    1    0.316323    0.890336    0.595666    11.00000    0.02280    0.03324 =
         0.03333    0.00499   -0.00336    0.00401
AFIX  43
H3    2    0.245948    0.955299    0.583533    11.00000   -1.20000
AFIX   0
C4    1    0.316391    0.750003    0.578600    11.00000    0.02359    0.04489 =
         0.02099   -0.00043   -0.00357   -0.00766
AFIX  43
H4    2    0.246091    0.717463    0.554663    11.00000   -1.20000
AFIX   0
C5    1    0.419797    0.658554    0.596850    11.00000    0.03081    0.02723 =
         0.02414   -0.00421    0.00071   -0.00511
AFIX  43
H5    2    0.421654    0.562252    0.585308    11.00000   -1.20000
AFIX   0
C6    1    0.520183    0.706284    0.631682    11.00000    0.02613    0.02077 =
         0.02204    0.00122    0.00233    0.00093
AFIX  43
H6    2    0.591527    0.643130    0.644328    11.00000   -1.20000
AFIX   0
N1    3    0.517412    0.842301    0.647852    11.00000    0.02084    0.02131 =
         0.01902   -0.00016    0.00147   -0.00085
SE1   4    0.642512    0.357488    0.750000    10.50000    0.01452    0.01452 =
         0.01601   -0.00088   -0.00088   -0.00136
BR1   5    0.577582    0.298224    0.654809    11.00000    0.02591    0.02274 =
         0.01663   -0.00270   -0.00253   -0.00243
BR2   5    0.445617    0.554383    0.750000    10.50000    0.01952    0.01952 =
         0.02308   -0.00106   -0.00106    0.00285
BR3   5    0.826266    0.539153    0.714696    11.00000    0.01924    0.02129 =
         0.02490    0.00127    0.00083   -0.00528
BR4   5    0.832066    0.167934    0.750000    10.50000    0.02095    0.02095 =
         0.02900   -0.00259   -0.00259    0.00445
BR5   5    1.074671    0.754041    0.739380    11.00000    0.03221    0.03103 =
         0.03041   -0.00342   -0.00268   -0.00241
HKLF 4


REM  1_a.res in P4(1)2(1)2
REM R1 =  0.0128 for    2608 Fo > 4sig(Fo)  and  0.0138 for all    2694 data
REM    106 parameters refined using      0 restraints

END

WGHT      0.0000      1.0761

REM Highest difference peak  0.370,  deepest hole -0.301,  1-sigma level  0.058
Q1    1   1.0659  0.8198  0.7176  11.00000  0.05    0.37
Q2    1   1.1338  0.7479  0.7150  11.00000  0.05    0.33
Q3    1   0.7313  0.2687  0.7500  10.50000  0.05    0.25
Q4    1   0.5885  0.3768  0.6340  11.00000  0.05    0.23
Q5    1   0.5773  0.8763  0.6615  11.00000  0.05    0.22
Q6    1   0.3161  0.8029  0.5924  11.00000  0.05    0.22
Q7    1   0.7191  0.8488  0.6638  11.00000  0.05    0.20
Q8    1   0.4364  1.1803  0.6227  11.00000  0.05    0.20
Q9    1   0.6009  0.9721  0.6907  11.00000  0.05    0.20
Q10   1   0.9080  0.4134  0.7516  11.00000  0.05    0.20
Q11   1   0.6165  0.6756  0.7147  11.00000  0.05    0.20
Q12   1   0.6167  0.2365  0.6360  11.00000  0.05    0.19
Q13   1   0.4418  0.6763  0.6213  11.00000  0.05    0.19
Q14   1   0.5118  0.2428  0.6434  11.00000  0.05    0.19
Q15   1   0.5608  0.8166  0.6310  11.00000  0.05    0.19
Q16   1   0.6243  0.7859  0.7200  11.00000  0.05    0.18
Q17   1   0.4871  0.6250  0.7694  11.00000  0.05    0.18
Q18   1   0.1228  0.7760  0.5621  11.00000  0.05    0.18
Q19   1   0.3656  1.0288  0.6596  11.00000  0.05    0.18
Q20   1   1.1364  0.6789  0.7571  11.00000  0.05    0.18
;
_shelx_res_checksum              38718

_shelx_hkl_file                  
;
  -1   0   0    0.60    0.60
   0  -1   0    1.00    0.40
   1   0   0    0.70    0.90
   0   1   0    0.10    0.50
   1   0   0    1.80    0.60
   0  -1   0    0.40    0.40
   1   0   0    2.30    0.70
  -1   0   0    5.10    0.90
  -1   0   0    0.30    0.50
   0  -1   0    0.80    0.60
  -1   1   0  300.37   13.20
   1  -1   0  275.77   13.10
   1  -1   0  270.87   12.90
  -1  -1   0  273.67   12.80
  -1   1   0  272.17   12.90
  -1   1   0  271.47   12.40
  -1  -1   0  289.87   12.30
   1   1   0  280.57   12.80
   1  -1   0  277.77   12.40
   1   1   0  279.57   12.30
  -1  -1   0  282.67   13.00
   1   1   0  269.97   13.00
   0   2   0   38.50    3.10
   2   0   0   40.50    3.20
  -2   0   0   39.50    3.30
   0  -2   0   36.80    3.10
   2   0   0   48.40    3.30
   0   2   0   38.90    2.70
   0  -2   0   43.70    2.70
   0   2   0   40.20    2.70
  -2   0   0   42.50    3.40
   0  -2   0   42.10    2.70
   2   0   0   39.20    3.40
  -2   0   0   37.50    3.10
   2   1   0   80.79    4.80
  -1  -2   0   74.29    4.70
  -2   1   0   74.49    5.30
  -2  -1   0   84.89    5.10
   1  -2   0   80.09    4.90
   2  -1   0   71.19    4.40
  -1   2   0   77.59    3.80
   1  -2   0   78.79    5.00
   2  -1   0   78.09    5.40
   2   1   0   73.59    4.50
   1   2   0   77.49    4.80
   2   1   0   81.39    5.20
  -1   2   0   75.09    4.90
   2  -1   0   76.19    4.90
  -2   1   0   64.99    4.30
   1   2   0   74.99    4.80
  -2   1   0   72.29    4.80
  -1  -2   0   78.79    4.80
  -2  -1   0   77.89    4.60
  -1   2   0   81.69    5.10
   2  -2   0 2686.83  121.09
   2  -2   0 2603.94  126.69
  -2   2   0 2687.43  127.59
   2   2   0 2728.13  126.19
  -2   2   0 2683.83  121.39
  -2  -2   0 2572.84  125.59
   2   2   0 2959.60  130.89
  -2  -2   0 2697.23  128.89
  -3   0   0    1.40    1.50
   0  -3   0   -0.50    1.10
   3   0   0    1.80    1.70
   3   0   0    1.20    1.90
  -3   0   0   -0.80    1.60
   0   3   0    1.70    1.30
   0   3   0    1.80    1.70
  -3   0   0    2.20    1.80
   0  -3   0    1.00    1.70
   0   3   0    0.80    1.20
   0  -3   0   -0.30    1.10
   3   0   0    5.40    2.00
  -1  -3   0  163.28    8.50
   1   3   0  141.09    8.40
   3   1   0  163.28    8.80
  -1  -3   0  148.79    8.60
  -1   3   0  155.68    7.40
  -1   3   0  149.79    8.80
  -3   1   0  144.09    8.70
   3  -1   0  147.59    9.40
  -3   1   0  144.39    8.20
   1   3   0  156.78    7.00
  -1   3   0  152.78    8.70
   1   3   0  155.68    8.70
  -1   3   0  150.18    8.80
  -1   3   0  151.28    7.40
   3   1   0  155.88    9.10
  -3   1   0  153.98    9.40
  -3  -1   0  157.08    8.80
   3  -1   0  145.79    8.30
  -3  -1   0  156.68    8.60
   3  -1   0  148.89    8.70
   3   1   0  161.88    8.80
  -3  -1   0  147.69    8.90
   1  -3   0  150.68    8.70
   2  -3   0 2912.01  126.39
   2   3   0 2795.82  137.99
  -2  -3   0 2757.82  134.39
   3   2   0 2917.21  140.89
   2   3   0 2878.11  135.29
   3   2   0 2835.22  134.79
  -2   3   0 2789.12  126.79
  -3   2   0 2928.81  131.59
  -3  -2   0 2773.32  138.59
  -3   2   0 2812.32  136.39
   3  -2   0 2732.93  130.79
   3  -2   0 2850.91  136.09
  -2   3   0 2935.21  137.09
   2  -3   0 2857.61  136.09
  -3  -2   0 2803.62  135.09
  -2  -3   0 2831.82  137.29
  -3  -3   0 4000.80  190.48
   3   3   0 3815.62  183.78
  -3   3   0 3678.03  179.38
   3  -3   0 3683.83  169.48
  -3  -3   0 3863.81  178.28
   3  -3   0 3673.63  185.68
  -3   3   0 3781.42  170.18
   0  -4   0  110.09    6.70
   4   0   0  105.99    8.20
   0   4   0  114.99    7.80
   4   0   0  112.99    7.80
  -4   0   0  116.19    8.10
  -4   0   0  107.79    7.80
   0  -4   0  119.29    6.70
   0   4   0  119.99    6.80
   0  -4   0  123.69    7.90
  -4   0   0  105.79    7.60
   0   4   0  118.29    6.80
   4   0   0  106.79    7.70
  -1   4   0  337.57   17.60
  -4  -1   0  339.77   17.60
  -4   1   0  323.17   17.40
  -1  -4   0  332.47   16.80
   4  -1   0  328.27   17.00
   1  -4   0  351.16   17.20
   4  -1   0  318.57   18.20
   1   4   0  357.36   17.00
  -1   4   0  338.47   15.80
  -1   4   0  346.37   15.80
   4   1   0  329.87   17.40
   1   4   0  343.97   15.40
  -1   4   0  339.97   18.60
   1   4   0  337.97   18.40
  -1  -4   0  356.16   17.50
   4   1   0  338.97   17.80
   4  -1   0  320.17   17.30
  -4  -1   0  340.27   17.50
  -1  -4   0  343.07   15.30
  -4   1   0  345.87   18.30
  -4   1   0  332.37   16.90
  -1   4   0  353.06   17.30
   4   1   0  342.07   17.40
  -4  -1   0  350.76   17.40
  -4   2   0  345.07   17.20
  -4   2   0  345.87   18.20
  -4   2   0  370.76   19.40
   2   4   0  358.06   18.10
   2   4   0  361.56   18.20
  -4  -2   0  367.96   17.50
   4   2   0  363.26   18.10
   4  -2   0  356.56   18.30
  -4  -2   0  354.96   18.20
  -2   4   0  347.37   18.40
   4  -2   0  336.37   17.10
   4   2   0  346.07   17.60
  -2   4   0  369.76   18.70
  -2  -4   0  336.77   18.00
   4   2   0  352.76   18.80
  -2   4   0  352.76   16.00
   2  -4   0  351.86   18.50
  -2  -4   0  337.37   17.80
  -4  -2   0  343.27   18.40
   4  -2   0  353.06   19.30
   2  -4   0  352.26   18.10
  -2   4   0  338.07   15.90
   3  -4   0   28.30    4.70
   3   4   0   27.80    5.40
   4   3   0   21.00    4.70
  -4   3   0   22.10    4.50
  -4   3   0   28.10    3.30
  -3  -4   0   35.70    5.00
  -4   3   0   33.20    5.60
   4  -3   0   17.90    4.10
   3   4   0   20.20    3.90
  -4  -3   0   28.50    4.80
   3  -4   0   21.20    5.10
  -4  -3   0   25.70    3.20
  -3   4   0   27.50    5.00
   4   3   0   20.40    3.90
  -3  -4   0   32.00    4.70
  -4  -3   0   28.20    4.80
   3  -4   0   25.60    2.60
   4  -3   0   22.30    4.90
  -3   4   0   32.10    5.00
   4   3   0   26.20    3.30
   4  -3   0   22.90    3.10
  -3   4   0   23.20    2.50
   4   4   0    2.30    1.70
   4  -4   0   22.80    4.60
  -4   4   0    0.70    3.50
  -4  -4   0    4.00    1.60
   4   4   0    0.20    3.60
  -4   4   0   -1.40    3.20
  -4  -4   0    3.00    3.30
   4  -4   0   -0.40    3.70
   4  -4   0    0.90    1.70
  -4  -4   0    2.70    3.20
  -4   4   0    1.20    1.70
   4   4   0    2.90    3.40
   0  -5   0    0.80    2.90
   0   5   0    1.00    2.10
   0  -5   0   -0.40    1.80
   5   0   0   -2.00    2.70
   0  -5   0   -0.20    2.00
   5   0   0    0.10    2.60
  -5   0   0   -0.20    2.80
  -5   0   0   -0.70    2.50
   5   0   0    0.20    3.30
   0   5   0    0.40    2.70
  -5   0   0    0.30    3.30
   0   5   0   -1.80    1.90
  -5   1   0    3.90    2.80
   5  -1   0    0.70    2.90
  -1   5   0    8.40    3.70
  -1   5   0    6.30    2.00
   1   5   0    9.20    1.80
   5  -1   0    7.00    3.90
   5   1   0    6.50    3.30
  -5   1   0    4.10    3.20
  -1   5   0    5.80    3.10
  -5  -1   0    6.60    3.30
   5  -1   0    8.80    3.30
  -1  -5   0    5.20    3.20
   1  -5   0    4.50    2.90
   5   1   0    4.20    3.30
  -1  -5   0    6.70    2.70
  -5   1   0    8.20    4.00
  -1  -5   0    5.70    1.60
  -1   5   0   10.10    3.10
  -5  -1   0    1.40    2.90
  -1   5   0    5.20    1.90
  -5  -1   0    7.70    3.40
   1   5   0    5.90    3.30
   5   1   0    6.60    3.30
   1   5   0    4.60    2.70
  -5   2   0  407.16   20.60
   2   5   0  435.06   21.60
  -5  -2   0  439.16   21.10
  -2   5   0  394.56   18.80
  -2  -5   0  385.06   21.20
   5   2   0  416.16   21.20
  -5  -2   0  380.56   21.60
  -5  -2   0  411.56   21.60
   5  -2   0  412.76   20.60
  -5   2   0  422.06   22.80
  -5   2   0  394.66   21.50
  -2   5   0  450.95   22.10
   5  -2   0  401.76   21.50
   5  -2   0  411.46   22.90
  -2  -5   0  407.46   21.10
  -2   5   0  432.56   21.80
   2   5   0  440.96   21.60
   5   2   0  429.16   22.40
   5   2   0  419.76   21.40
   2  -5   0  400.96   21.50
  -2   5   0  415.86   18.90
   5   3   0   26.70    4.60
  -5   3   0   30.30    5.40
   3  -5   0   20.80    5.20
  -5  -3   0   22.40    3.80
  -5  -3   0   20.90    5.00
  -5   3   0   30.90    4.00
   5  -3   0   22.20    6.30
  -3   5   0   27.30    2.60
  -3   5   0   21.70    5.10
  -3  -5   0   16.30    4.00
  -3   5   0   31.60    5.90
  -3  -5   0   25.30    4.80
  -3   5   0   22.50    2.40
  -5   3   0   46.20    7.30
   5  -3   0   25.80    4.90
   5   3   0   24.30    4.10
   5   3   0   28.50    5.90
   3   5   0   18.90    4.30
   5  -3   0   27.00    3.90
   3   5   0   22.70    5.00
  -5  -3   0   21.50    5.00
   3  -5   0   25.60    4.70
  -5   4   0  229.08   15.10
   5   4   0  251.97   16.10
  -5  -4   0  221.88   14.80
   5  -4   0  236.78   14.90
   4  -5   0  232.98   14.70
  -4   5   0  248.58   15.40
   5   4   0  239.08   14.60
  -5  -4   0  240.08   12.30
   5  -4   0  215.88   16.10
  -4   5   0  225.08   11.50
   4   5   0  241.18   14.70
  -5   4   0  251.27   16.50
  -4  -5   0  221.28   14.60
  -4   5   0  246.08   16.10
  -4  -5   0  225.18   14.50
   4   5   0  239.48   15.50
  -5   4   0  232.68   12.40
   5  -4   0  246.68   12.50
   4  -5   0  246.38   16.00
   4  -5   0  247.78   11.50
   5   4   0  220.98   12.50
  -5  -4   0  244.18   14.90
  -5  -5   0  472.25   21.10
   5  -5   0  519.15   22.10
  -5   5   0  493.05   27.20
   5   5   0  493.85   25.40
  -5   5   0  475.85   25.80
  -5  -5   0  470.75   25.30
  -5  -5   0  438.86   25.20
   5   5   0  451.25   21.40
  -5   5   0  433.26   21.90
   5  -5   0  421.06   24.80
   5   5   0  523.85   26.90
   5  -5   0  489.55   27.10
  -6   0   0    7.30    4.20
   6   0   0    5.20    3.80
   6   0   0   11.40    5.10
   6   0   0    3.40    4.00
   0   6   0   10.50    4.30
   0   6   0    5.60    2.80
   0  -6   0   11.70    2.90
   0  -6   0    9.60    2.90
  -6   0   0   10.80    4.60
  -6   0   0    7.80    3.60
   0   6   0   11.10    3.10
  -6  -1   0  182.78   12.20
   6   1   0  169.48   11.80
  -1   6   0  169.58    9.40
  -6  -1   0  169.78   11.90
   6  -1   0  168.08   11.50
   1   6   0  168.58    8.90
  -1  -6   0  180.98   11.40
   6  -1   0  165.88   13.10
   1   6   0  174.18   11.80
   6   1   0  178.18   12.40
  -1   6   0  159.78    9.40
   6  -1   0  177.08   12.00
  -6   1   0  174.38   12.20
   6   1   0  169.98   12.40
  -1   6   0  152.78   10.80
  -6   1   0  169.58   11.40
  -6   1   0  183.38   13.10
  -1   6   0  162.98   12.10
  -1  -6   0  151.98   11.40
  -1   6   0  171.28   11.90
   1   6   0  179.08   11.00
   1  -6   0  163.98   10.90
  -6  -1   0  155.18   11.80
   6   2   0  238.28   14.60
  -2  -6   0  230.88   13.90
  -6   2   0  234.38   16.00
  -6  -2   0  255.17   14.50
  -2   6   0  224.78   11.50
   6   2   0  229.58   14.70
  -2   6   0  235.18   11.60
   6  -2   0  237.58   16.50
  -6   2   0  205.78   13.50
   2   6   0  256.07   14.90
  -6  -2   0  233.38   15.00
   6  -2   0  224.98   14.60
  -2   6   0  217.98   14.50
  -2   6   0  250.67   15.10
  -6   2   0  222.88   14.90
   6  -2   0  258.47   14.20
   6   2   0  250.17   15.70
  -6  -2   0  233.38   14.90
  -2  -6   0  222.38   14.50
  -2   6   0  245.38   15.30
   2   6   0  250.27   14.50
  -6   3   0  510.05   27.90
   6  -3   0  502.85   26.40
   6   3   0  480.05   25.30
  -3   6   0  516.85   27.00
  -6   3   0  476.25   26.50
   6  -3   0  496.55   24.70
  -6  -3   0  485.05   26.30
  -6  -3   0  491.25   26.70
   6   3   0  530.15   26.40
   6   3   0  539.85   27.70
  -6  -3   0  528.05   25.20
   6  -3   0  487.05   28.10
   3  -6   0  488.55   26.60
  -3   6   0  496.25   22.50
   3   6   0  527.85   26.70
  -3  -6   0  527.75   26.40
  -3   6   0  492.55   26.50
  -3   6   0  464.95   22.40
  -3  -6   0  512.05   26.00
   3   6   0  512.75   26.30
  -3   6   0  515.85   27.10
   6  -4   0  362.46   18.30
   4  -6   0  356.76   22.20
  -4   6   0  342.97   16.20
  -6   4   0  354.96   20.90
  -4   6   0  353.06   21.80
   6   4   0  387.86   20.70
   6   4   0  356.86   18.80
  -6  -4   0  340.67   20.60
  -6   4   0  354.46   18.30
   6  -4   0  335.67   20.60
  -4   6   0  356.96   16.30
   6   4   0  402.06   22.40
   4   6   0  389.66   21.50
   6  -4   0  373.06   22.80
  -6  -4   0  367.56   18.40
  -4   6   0  369.36   21.50
   4   6   0  376.26   20.80
   4  -6   0  341.97   21.30
  -6   4   0  381.36   24.90
  -4  -6   0  367.86   20.70
  -6  -4   0  284.37   22.80
  -4  -6   0  351.76   20.40
  -5   6   0 1276.67   62.69
   6  -5   0 1276.37   54.39
   5  -6   0 1203.18   57.49
  -5   6   0 1222.28   58.19
  -6  -5   0 1201.08   57.59
  -6  -5   0 1196.98   53.79
   5  -6   0 1197.88   58.89
  -5   6   0 1211.28   53.19
  -5  -6   0 1144.49   57.39
  -5  -6   0 1166.28   57.29
   5   6   0 1188.48   58.49
  -6  -5   0 1184.58   57.79
  -6   5   0 1171.78   54.29
  -6   5   0 1266.97   58.29
   6  -5   0 1192.48   59.49
   6   5   0 1213.38   54.39
   6   5   0 1303.07   59.29
  -6   5   0 1264.97   59.89
   5   6   0 1223.88   57.49
   6  -5   0 1206.48   57.49
   6   5   0 1200.38   57.39
   6   6   0 1075.19   50.59
  -6   6   0 1029.50   49.60
  -6   6   0  942.91   44.30
  -6   6   0 1011.40   51.09
  -6  -6   0  988.40   48.80
   6  -6   0  905.21   50.09
  -6  -6   0  814.62   51.39
   6  -6   0 1124.19   44.40
   0   7   0   -3.30    4.30
  -7   0   0   -2.80    4.10
   7   0   0    2.80    4.60
   0  -7   0    1.00    2.50
   7   0   0    0.50    4.00
   7   0   0    5.50    5.10
  -7   0   0   -1.30    3.50
   0   7   0    0.80    2.80
   0  -7   0    1.50    2.80
  -7   0   0    0.90    4.10
   0   7   0    3.50    3.10
   0   7   0    1.50    4.00
   1  -7   0  266.17   15.50
   7  -1   0  256.57   18.30
   1   7   0  294.07   16.00
  -1   7   0  273.57   16.80
  -7  -1   0  267.67   16.90
  -7  -1   0  290.67   17.30
   7  -1   0  266.57   16.30
   7  -1   0  249.28   16.50
   7   1   0  270.47   17.40
  -1   7   0  269.17   17.20
  -7   1   0  265.87   17.80
   1   7   0  271.07   16.70
  -1  -7   0  238.48   16.30
   7   1   0  262.67   16.70
  -7   1   0  252.47   16.00
  -7  -1   0  267.17   16.90
  -7   1   0  254.17   16.90
  -1   7   0  265.17   13.90
  -1   7   0  259.77   13.90
   1   7   0  268.37   13.20
  -1  -7   0  278.57   15.00
   7   1   0  241.08   17.20
  -2   7   0  123.59   10.70
  -2  -7   0  112.49   10.60
  -7   2   0  127.69   11.40
   7  -2   0  124.59   10.80
  -7  -2   0  125.39   11.30
   7  -2   0  124.89   12.80
  -7   2   0  141.59   12.80
   7  -2   0  119.99   10.00
   2  -7   0  110.29   10.30
   2   7   0  123.39   10.40
  -2   7   0  154.58   19.00
  -2   7   0  120.89    7.20
  -7  -2   0  122.89   11.30
   7   2   0  117.59   11.80
   7   2   0  105.19   10.40
  -7  -2   0  122.79   10.50
  -2   7   0  116.59    7.10
  -2  -7   0  124.29    9.70
  -7   2   0  121.79    9.90
  -2   7   0  118.39   11.30
   7   2   0  115.09   10.90
   3   7   0  345.57   19.70
  -7   3   0  318.47   17.80
   7  -3   0  318.97   21.70
  -7  -3   0  320.77   18.30
  -3   7   0  322.87   14.60
  -3  -7   0  306.07   18.50
   7   3   0  335.17   19.00
  -3  -7   0  307.07   19.30
  -3   7   0  303.87   20.00
  -7   3   0  353.36   21.70
  -3   7   0  305.87   14.60
   7   3   0  322.77   19.40
  -3   7   0  328.67   20.00
   7  -3   0  316.47   17.90
   7   3   0  322.57   20.70
  -7  -3   0  327.87   19.70
   3   7   0  332.87   19.60
   7  -3   0  321.97   19.60
   3  -7   0  306.87   19.50
  -7  -3   0  302.27   19.70
  -7   3   0  333.37   20.10
  -3   7   0  333.77   19.90
  -7   4   0  242.58   17.20
   7   4   0  247.18   16.50
   4   7   0  244.48   17.10
  -7   4   0  271.17   19.00
   7   4   0  257.97   18.30
   4   7   0  256.77   16.80
  -7  -4   0  247.78   17.00
   7   4   0  227.28   14.90
  -4   7   0  268.37   18.00
   7  -4   0  237.98   18.70
  -7  -4   0  255.87   14.60
  -4   7   0  257.37   17.50
  -4  -7   0  228.88   16.20
   4  -7   0  233.88   17.20
   7  -4   0  253.07   16.80
   7  -4   0  248.18   16.60
  -4  -7   0  235.48   16.50
  -7   4   0  214.48   14.00
  -7  -4   0  244.08   16.90
  -7  -5   0   17.50    4.00
  -7   5   0   19.40    4.20
   7  -5   0   23.50   12.30
  -7  -5   0   22.80    7.20
   7   5   0   22.50    4.80
  -7   5   0   12.50    7.10
  -5   7   0   22.20    7.60
  -5  -7   0   28.60    8.40
   5  -7   0   19.90    7.10
   5   7   0   17.00    6.90
  -5  -7   0   24.80    6.80
   7  -5   0   19.50    4.10
  -6   7   0    3.60    6.30
   7  -6   0    5.10    7.00
   7   6   0    7.80    6.70
  -7   6   0    0.10    2.80
   6  -7   0    2.10    7.20
  -7  -6   0    3.30    2.10
   6   7   0    6.20    7.10
  -7  -6   0    5.30    6.30
  -6  -7   0   12.40    6.80
   7  -6   0    5.40    3.20
  -7   6   0   -1.90    6.10
   7  -7   0  565.04   36.10
  -7   7   0  606.24   27.80
  -7   7   0  668.03   35.60
   7   7   0  669.83   36.50
  -7  -7   0  606.64   34.20
   8   0   0 1462.25   69.69
   0   8   0 1488.55   70.09
   8   0   0 1461.25   71.19
  -8   0   0 1438.26   69.89
   0   8   0 1458.45   67.29
   8   0   0 1584.24   70.49
   0  -8   0 1538.85   67.19
   0  -8   0 1521.05   67.09
   0   8   0 1475.45   67.49
   0   8   0 1524.75   70.49
   1   8   0  142.79    8.50
   1  -8   0  154.48   13.60
  -8  -1   0  148.09   13.30
  -8   1   0  141.39   13.20
  -8  -1   0  147.89   12.80
  -1   8   0  156.98   13.10
   8  -1   0  147.49   14.70
   8  -1   0  128.19   12.10
   8   1   0  141.79   13.50
  -1  -8   0  161.08   10.70
   1   8   0  146.19    8.40
  -1   8   0  142.39    9.60
  -1  -8   0  150.18   13.10
  -8   1   0  164.58   12.60
  -1   8   0  168.38   13.70
  -8  -1   0  169.78   13.50
   1   8   0  160.68   11.50
   1   8   0  153.88   12.90
   8   1   0  164.28   14.00
   8   1   0  166.18   13.10
  -1   8   0  157.98    9.60
   8  -1   0  147.99   12.70
  -8   1   0  142.59   14.00
  -1   8   0  135.89   11.20
   2  -8   0   -1.70    4.30
  -2   8   0    0.90    2.20
   8   2   0    8.20    6.30
   8   2   0    3.40    5.20
  -8   2   0   -5.90    5.60
  -8  -2   0   -2.90    4.90
   8  -2   0    3.00    6.60
  -8  -2   0   -0.80    4.40
   8  -2   0   -1.40    4.40
   2   8   0    6.70    5.40
   8   2   0   -0.60    5.00
  -8  -2   0    2.20    5.20
  -8   2   0    1.60    4.40
  -2   8   0    0.60    4.50
  -2   8   0    1.00    1.40
  -8   2   0    5.10    5.40
  -2  -8   0   -2.10    3.70
  -2  -8   0   -0.30    4.80
   8  -2   0   -1.30    4.50
   2   8   0    0.60    4.30
  -2   8   0   -2.80    5.20
  -2   8   0    1.30    2.30
   8  -3   0   89.49   13.60
  -3  -8   0   69.59    8.80
  -8  -3   0   73.39    8.80
  -3   8   0   90.49   11.10
  -8   3   0   75.59    8.40
  -8  -3   0   69.69   10.00
  -3   8   0   87.79   18.40
  -8   3   0   64.09    9.40
   3  -8   0   67.69    9.30
   8   3   0   73.79   11.20
   8   3   0   82.49    9.70
   8  -3   0   70.49    8.40
   3   8   0   58.49    8.60
  -3  -8   0   83.49   11.60
  -8  -4   0  364.26   19.80
   4  -8   0  342.97   22.40
   8  -4   0  361.26   19.50
  -4   8   0  351.06   22.80
  -4   8   0  359.76   22.90
  -8  -4   0  326.17   21.80
  -8   4   0  354.36   19.50
   8   4   0  364.86   23.80
   4   8   0  342.47   22.20
  -4  -8   0  332.57   21.60
  -4  -8   0  338.87   20.90
  -8   4   0  355.26   22.60
   8   4   0  327.17   20.20
   8  -4   0  317.97   24.00
  -8   5   0  312.07   21.80
   8   5   0  301.87   18.20
  -5   8   0  330.67   22.40
   5   8   0  291.47   30.50
  -8   5   0  285.77   17.30
   8  -5   0  326.37   17.70
   5  -8   0  309.27   21.90
  -5  -8   0  298.17   20.80
  -8  -5   0  321.77   21.50
   8  -5   0  319.87   23.90
  -8  -5   0  323.07   17.40
   8   5   0  357.26   23.50
   6  -8   0   21.70    9.20
  -6  -8   0   29.70    8.50
  -8  -6   0   17.20    7.70
   6   8   0   13.00    7.70
   8  -6   0   19.30    4.50
   8   6   0   38.30   10.50
  -8  -6   0   22.70    3.90
   8  -6   0   13.40    8.90
  -6   8   0   21.90    8.30
   8   6   0   23.90    4.60
  -8   6   0   34.00    9.20
  -7  -8   0   89.29   12.20
  -7   8   0   80.79   12.70
  -8  -7   0   80.69   12.60
  -8   7   0   83.19   12.50
   8  -7   0   94.99   14.10
   8   7   0   98.39   15.00
   8  -7   0  104.29    6.70
  -8   7   0   90.29    6.80
   7  -8   0   82.89   14.00
   7   8   0  103.29   14.60
   8  -8   0  203.78   21.30
  -8   8   0  217.58   20.30
  -8  -8   0  214.28   19.80
   8   8   0  229.98   21.60
   0   9   0   -2.50    3.20
  -9   0   0    0.40    5.80
   0   9   0    1.30    3.80
   9   0   0    8.30    6.20
   9   0   0   -4.20    5.90
   0  -9   0    1.50    3.40
  -9   0   0    0.70    5.20
   0   9   0   -0.20    6.00
  -9   0   0    4.10    5.80
  -9  -1   0    3.10    5.80
  -9  -1   0   -3.90    5.20
  -1  -9   0   -0.40    3.50
  -1   9   0    2.30    5.90
   1  -9   0    0.00    4.10
  -9   1   0    1.80    5.00
   1   9   0    0.30    2.10
  -9   1   0    1.60    6.30
  -1   9   0   -2.40    3.00
   1   9   0    5.60    6.30
   1   9   0   -3.10    4.20
  -1   9   0   -3.80    3.90
   9   1   0   -2.20    6.10
   1   9   0    0.80    2.00
   9   1   0    2.80   11.70
  -1   9   0    0.50    3.10
   9  -1   0    0.80    5.50
   9  -2   0   14.20    7.90
   2  -9   0   25.00    6.30
  -2   9   0   23.20    6.50
  -9   2   0   18.90    7.50
   2   9   0   14.20    5.80
  -2  -9   0   16.70    5.20
  -9  -2   0   15.90    7.50
  -2   9   0   27.40    8.00
  -9  -2   0   30.20    8.10
  -2  -9   0   23.20    7.50
  -2   9   0   24.00    3.50
   9  -2   0   21.70    6.70
  -9   2   0   19.60    6.10
   9   2   0   23.30    8.60
   9   2   0   17.60    7.20
  -2   9   0   18.80    3.20
   9   3   0  155.68   14.80
  -9   3   0  171.38   13.40
   3  -9   0  169.88   14.80
  -3  -9   0  157.98   15.10
  -3   9   0  196.78   15.70
   9  -3   0  186.08   13.90
   3   9   0  189.28   15.20
  -9  -3   0  174.98   16.00
  -9   3   0  189.38   16.40
  -9  -3   0  178.98   14.50
  -3  -9   0  167.38   13.50
   9  -3   0  178.18   18.20
  -3   9   0  176.38   16.40
   9   3   0  198.28   17.70
   9  -4   0  146.69   17.00
  -4   9   0  165.78   16.40
   4  -9   0  150.38   15.10
  -9  -4   0  197.28   13.50
   4   9   0  181.18   15.90
  -9  -4   0  158.98   15.80
   9   4   0  160.58   14.00
  -4   9   0  153.98   15.50
  -9   4   0  167.78   12.70
  -9   4   0  168.28   16.20
  -4  -9   0  142.89   15.00
   9   4   0  125.59   15.30
   9  -4   0  165.48   12.90
   9   5   0    2.40    5.20
   5  -9   0   -1.60    6.70
  -5   9   0    4.20    7.50
   5   9   0   10.30    7.70
  -5  -9   0    5.00    7.00
   9  -5   0   -2.10    8.20
  -9  -5   0   -1.80    4.00
  -9   5   0   12.30    7.70
   9   5   0    4.90    7.60
   9  -5   0    9.00    4.90
  -9  -5   0    0.70    7.40
  -9   5   0    3.70    4.30
   9  -6   0  125.79   17.10
  -6  -9   0  164.48   16.70
   6  -9   0  145.39   16.30
  -9  -6   0  173.38   17.40
  -9   6   0  143.19   10.80
  -6   9   0  173.98   17.70
   6   9   0  152.08   16.40
   9   6   0  136.19   16.60
   9  -6   0  159.38   11.10
  -9  -6   0  153.48   10.30
   9   6   0  144.19   11.30
  -9   6   0  106.69   14.60
   7  -9   0   14.60    9.00
  -7   9   0    0.30    8.90
  -7  -9   0   -3.30    7.60
  -9  -7   0   -6.30    7.70
   7   9   0   11.50    9.30
  -9   7   0    3.50    3.30
   9  -7   0   14.60   10.30
   9  -7   0    3.00    3.40
   9   7   0    1.40    9.90
  -9   7   0    6.00    9.20
   9   8   0  418.26   29.90
   8   9   0  389.36   28.90
   8  -9   0  354.56   28.50
  -9   8   0  388.36   28.30
  -8  -9   0  395.16   27.30
   9  -8   0  315.87   28.30
  -8   9   0  399.36   28.10
  -9  -8   0  360.76   26.70
   0  10   0  533.05   28.30
  10   0   0  525.65   33.80
   0  10   0  643.34   33.90
  10   0   0  619.84   33.10
 -10   0   0  552.94   32.50
   0  10   0  576.24   28.70
   0  10   0  539.65   27.80
 -10   1   0    3.40    6.80
  -1  10   0    5.60    7.60
  10  -1   0    8.80    8.20
 -10  -1   0   -6.60    6.90
   1 -10   0    1.20    4.60
   1  10   0    5.30    5.20
  -1  10   0    1.30    3.40
  -1  10   0    1.80    3.60
  10  -1   0   -0.90    6.20
   1  10   0   11.50    8.30
  10   1   0   12.00    7.50
  10   1   0    7.60    7.40
  -1  10   0   -2.80    4.30
  -1 -10   0    7.00    4.30
  10   2   0    3.90    7.00
 -10   2   0    1.80    6.80
 -10  -2   0   -2.20    7.10
   2 -10   0    0.40    5.20
  -2  10   0    1.80    6.90
  -2  10   0    3.90    5.30
  10  -2   0   -1.90    7.70
  -2  10   0    4.80    2.50
   2  10   0    2.20    5.70
  -2  10   0    1.30    2.40
  10   2   0    0.30    8.00
  10  -2   0    5.80    6.30
 -10  -3   0   57.29    9.40
 -10  -3   0   55.19   10.20
   3  10   0   58.09    9.60
  -3  10   0   70.99   12.10
  10   3   0   59.69   10.20
 -10   3   0   61.19   10.80
  10  -3   0   73.49   13.70
   3 -10   0   68.29   10.10
  -3 -10   0   53.99    8.40
  10  -3   0   54.69    8.90
  -3  10   0   72.39   10.50
 -10   3   0   64.39    9.00
  -3 -10   0   50.99   10.00
  10   3   0   52.89   11.20
   4  10   0   39.00    9.10
  -4  10   0   36.70   10.10
 -10  -4   0   32.10    8.90
  10   4   0   36.40   10.70
 -10   4   0   39.30    7.30
  10  -4   0   30.30    7.40
  10   4   0   41.00    8.90
 -10   4   0   26.00    9.10
  -4 -10   0   33.10    9.60
  10  -4   0   32.20   11.40
  -5 -10   0  108.09   14.00
  10  -5   0   96.19   10.40
   5  10   0   85.19   13.00
 -10  -5   0  101.29   13.80
  10  -5   0  106.79   17.10
 -10   5   0  113.99   10.80
   5 -10   0  103.99   14.40
 -10   5   0  121.49   15.50
  10   5   0  105.39   15.70
  10   5   0  103.79   11.90
 -10  -5   0  107.29   10.60
  -5  10   0  105.39   15.30
 -10   6   0  111.49   10.10
  10  -6   0  121.29   10.60
  10   6   0  130.49   18.10
 -10  -6   0  121.59    9.50
  -6  10   0  111.19   16.30
  -6 -10   0   90.29   13.20
  10   6   0  110.79   11.10
 -10   6   0   99.99   15.00
 -10  -6   0   81.89   15.50
   6  10   0  100.19   14.90
  10  -6   0  133.79   18.70
   6 -10   0   87.19   14.00
 -10   7   0  238.78   22.20
  -7 -10   0  208.38   20.40
  10  -7   0  239.38   12.80
  -7  10   0  217.38   22.00
 -10  -7   0  153.48   18.30
  10  -7   0  178.78   21.50
   7 -10   0  189.58   21.10
  10   7   0  182.58   20.60
   7  10   0  233.78   22.70
   0  11   0   -1.20    3.50
   0  11   0   -3.80    7.50
   0  11   0   -5.80    3.50
   0  11   0    1.50    4.80
 -11   0   0   -7.30    7.30
   0  11   0   -0.70    3.90
  11   0   0   -3.20    7.40
  11   0   0    4.10    8.50
   1 -11   0  129.79   11.10
  11   1   0  131.39   15.80
  -1  11   0  108.69    9.00
  11  -1   0  118.39   14.10
  11  -1   0  108.39   16.30
   1  11   0  124.59   12.10
  -1  11   0  117.29   11.10
  -1  11   0  130.59   15.50
 -11   1   0  124.99   15.00
  -1  11   0  118.29    9.10
   1  11   0  120.39   15.20
 -11  -1   0  103.79   14.10
  11   1   0  116.79   15.90
 -11   2   0   72.39   12.50
  11   2   0   56.09   12.50
  -2  11   0   86.29   13.80
  11  -2   0   82.49   14.50
  -2  11   0   89.39   10.80
  11  -2   0   86.79   11.80
   2 -11   0   87.59   10.50
   2  11   0   86.39   10.90
  11   2   0   59.39   11.60
   2  11   0   85.29   13.10
 -11  -2   0   86.09   13.60
  -2 -11   0   77.19    9.20
  -3  11   0  162.88   15.80
  11   3   0  163.78   18.10
 -11  -3   0  166.68   17.60
  -3 -11   0  182.48   23.00
 -11   3   0  161.78   17.60
   3  11   0  164.78   16.00
  11  -3   0  166.38   15.40
  11  -3   0  152.18   20.00
  11   3   0  155.98   16.70
   3 -11   0  164.38   15.30
  -4 -11   0   30.20   10.40
  11  -4   0   51.89   13.80
   4  11   0   37.00    9.90
  11  -4   0   36.30    8.90
  11   4   0   33.30   11.80
   4 -11   0   31.00    9.30
  11   4   0   40.70    9.80
  -4  11   0   35.10   10.80
 -11  -4   0   23.70    9.30
 -11   4   0   18.50   10.40
   5 -11   0  109.79   14.60
  11   5   0  109.19   17.40
  11  -5   0   91.99   17.20
  11   5   0   89.59   12.10
   5  11   0  106.09   14.80
  11  -5   0  117.79   12.00
  -5  11   0  128.19   17.10
  -5 -11   0   91.39   14.00
 -11  -5   0   80.89   13.60
 -11   5   0  107.69   15.40
  12   0   0   74.29   14.50
  12   0   0   74.49   13.60
   0  12   0   69.59    8.50
   0  12   0   74.99   13.80
 -12   0   0   65.99   12.80
   0  12   0   71.79    6.40
  12  -1   0   20.80   17.50
  12  -1   0   16.60    9.60
 -12  -1   0   24.60   10.50
 -12   1   0   20.20   10.00
  -1  12   0   25.40    4.50
   1  12   0   33.70   11.00
  -1  12   0   28.40   11.10
  -1  12   0   27.00    6.40
  12   1   0   39.60   11.50
   1  12   0   34.60    7.80
  12   2   0   16.40   10.30
   2 -12   0   31.40    7.40
  12   2   0   17.00    9.70
  -2  12   0   19.80   10.10
  12  -2   0   20.00    8.60
 -12  -2   0   15.60    9.70
   2  12   0   12.90   10.60
  12  -2   0   22.40   11.20
 -12   2   0   14.60    9.80
   0   1  -1  574.84   27.80
   1   0  -1  553.14   28.70
   0   1   1  554.24   27.60
   1   0   1  557.54   28.30
   1   0   1  605.54   28.60
   0  -1  -1  544.35   27.50
  -1   0   1  536.05   28.90
   1   0  -1  540.75   27.50
   0  -1   1  553.84   27.70
   0  -1   1  537.45   26.20
  -1   0  -1  583.54   30.10
  -1   0  -1  534.25   28.20
   0  -1  -1  571.94   27.80
   1   1   1 1721.43   77.09
  -1   1  -1 1679.53   77.59
   1  -1   1 1717.83   73.39
  -1  -1   1 1653.63   76.19
   1   1   1 1403.96   77.59
   1   1  -1 1669.03   76.29
  -1  -1  -1 1682.83   76.89
   1  -1   1 1577.84   76.99
   1  -1  -1 1693.83   75.69
  -1   1   1 1744.73   76.09
  -1  -1   1 1619.44   78.09
  -1  -1  -1 1784.92   78.79
  -1   1   1 1660.83   76.99
   1   1  -1 1750.12   78.69
   1  -1  -1 1628.04   76.79
  -1   1  -1 1684.23   73.39
   0   2   1  206.28   10.00
   0   2  -1  213.68   10.10
   0  -2   1  208.38    9.50
   2   0   1  197.08    9.90
   0   2   1  200.48    9.60
   0   2  -1  198.78    9.50
  -2   0   1  211.68   10.30
  -2   0  -1  211.78   10.00
   2   0  -1  204.58   10.00
  -2   0  -1  202.08   10.10
  -2   0   1  186.08    9.90
   0   2   1  201.38    9.60
  -2   0  -1  198.08   10.20
   0  -2   1  200.88    9.40
   2   0   1  199.98   10.30
   0  -2  -1  195.78    9.50
   2   0   1  199.58   10.10
   2   0  -1  191.68   10.20
   0  -2  -1  198.28   10.00
  -2   0   1  187.78    9.90
   0  -2  -1  202.78    9.60
   0  -2   1  197.58   10.00
   2   0  -1  192.08   10.00
   0   2  -1  201.08    9.40
  -2  -1   1   29.00    2.60
  -2   1  -1   27.40    2.30
   1  -2   1   22.10    2.70
   2  -1  -1   26.60    3.20
  -1  -2  -1   25.90    2.80
  -2   1  -1   27.00    3.20
  -1   2   1   29.10    3.00
  -1   2   1   27.40    2.90
   1   2  -1   26.60    2.70
  -2  -1   1   25.30    2.70
   2   1   1   20.30    2.50
  -1   2   1   28.60    2.20
   1  -2   1   22.90    2.70
   1   2  -1   26.40    2.80
  -2   1  -1   29.30    2.90
  -1  -2  -1   21.60    2.60
   2  -1  -1   23.20    2.50
  -2  -1   1   31.50    3.20
   2   1   1   26.50    2.60
   2  -1  -1   27.70    2.90
   2   1   1   18.30    2.60
  -2  -1  -1   37.60    2.80
   2   1  -1   31.40    2.70
   2  -1   1   28.50    3.20
   1   2   1   29.60    2.90
   2  -1   1   28.40    2.30
  -1  -2   1   27.30    2.80
   1   2   1   30.10    2.90
   1  -2  -1   30.10    2.10
   2   1  -1   28.30    2.70
  -2   1   1   29.60    2.60
   1   2   1   29.30    1.70
  -2   1   1   29.30    3.10
  -1  -2   1   32.90    2.80
   1  -2  -1   32.80    2.90
  -2  -1  -1   34.70    3.00
  -1   2  -1   31.50    3.00
  -1   2  -1   27.80    3.00
   1  -2  -1   28.30    3.10
  -2   1   1   24.10    3.00
   2  -1   1   29.90    2.90
  -2  -1  -1   29.10    3.00
   2   1  -1   30.90    3.20
   2  -2   1  505.95   23.10
  -2   2   1  506.25   24.40
  -2  -2   1  510.95   24.40
   2  -2  -1  522.65   25.00
   2   2  -1  533.15   24.20
   2  -2   1  538.45   25.00
  -2   2   1  559.44   25.10
   2  -2   1  503.25   24.30
  -2  -2   1  510.05   24.20
   2  -2  -1  542.15   23.50
  -2   2  -1  508.95   24.40
  -2  -2  -1  539.35   24.60
  -2   2   1  513.25   23.50
   2   2  -1  523.65   23.20
  -2   2  -1  507.65   23.10
  -2  -2  -1  515.85   23.30
   2   2   1  532.05   24.30
   2   2   1  519.85   24.60
   2   2  -1  549.05   24.70
   2  -2  -1  499.05   24.30
  -2  -2  -1  519.25   24.30
  -2  -2   1  541.65   23.20
  -2   2  -1  565.04   25.10
   2   2   1  524.05   23.30
   0  -3  -1    4.10    1.40
  -3   0   1    1.90    1.70
  -3   0   1    3.40    1.80
  -3   0  -1    6.60    2.20
   0  -3  -1    3.20    1.80
   3   0  -1    1.60    1.80
   0  -3   1    2.90    1.20
   3   0   1    2.60    1.80
  -3   0  -1    3.80    1.90
   3   0   1    1.50    1.70
   3   0  -1    4.20    2.20
   3   0  -1    2.70    1.80
  -3   0  -1    1.80    2.00
   0   3  -1    1.30    1.20
   0  -3  -1    8.40    1.80
   0   3   1    1.20    1.80
  -3   0   1    2.60    2.00
   0   3   1    7.60    1.70
   3   0   1    1.00    1.80
   0   3   1    4.10    1.40
   0   3  -1    4.80    1.50
   0  -3   1    2.10    1.90
   0   3  -1    5.50    1.90
   0  -3   1    3.80    1.40
   3   1   1 1047.10   47.00
  -3  -1   1 1039.00   46.90
   1   3  -1 1043.60   46.70
  -1   3   1 1084.49   47.10
   3  -1   1 1032.20   47.10
  -3   1   1 1035.00   47.00
   1   3   1 1050.19   46.90
  -1  -3   1 1055.99   45.20
   1   3   1 1045.50   45.40
  -1  -3   1 1010.50   46.80
   3   1  -1 1078.49   47.00
  -3   2  -1 2967.00  137.09
  -2   3   1 2986.40  135.69
  -2  -3  -1 2945.51  141.59
  -2   3   1 2939.71  143.29
  -3   2  -1 3076.49  143.99
   3  -2  -1 3053.39  139.19
   2  -3   1 2831.02  142.29
   2  -3   1 3110.19  131.19
   3   2   1 3029.20  142.09
  -3  -2   1 2898.81  141.39
   2   3  -1 3165.48  146.29
   3  -2  -1 2914.01  142.09
  -2  -3  -1 3010.80  144.69
  -3  -2   1 3015.50  146.09
   3   2   1 3206.58  148.09
   2   3  -1 3036.20  141.79
   2  -3  -1 2894.91  142.19
   2  -3  -1 3004.60  134.99
  -2  -3   1 3056.29  144.19
  -2   3  -1 3185.38  144.59
   2   3   1 3122.99  146.19
  -3  -2  -1 2881.71  141.99
  -2   3  -1 2984.90  131.49
   3   2  -1 3023.20  141.29
  -2  -3   1 2864.21  140.79
  -3   2   1 3092.09  139.89
  -3  -2  -1 2699.63  144.39
   3  -2   1 2911.51  142.89
   2   3   1 3053.19  142.39
  -3   2   1 3025.90  143.09
   3   2  -1 3000.80  147.19
   3  -2   1 2949.30  136.99
   3   3   1 1511.95   67.59
   3   3  -1 1499.75   67.49
   3   3  -1 1596.24   70.29
   3   3   1 1580.54   69.29
  -3   3  -1 1583.34   70.49
  -4   0  -1  100.09    6.90
   0   4   1   93.49    5.90
  -4   0   1  103.39    7.00
   0   4  -1   79.49    5.60
   0  -4  -1   95.39    5.80
   0  -4  -1   93.79    5.90
  -4   0  -1   88.49    7.20
  -4   0   1   93.99    7.20
   4   0   1   89.19    7.40
  -4   0  -1   83.79    6.80
   4   0  -1   93.09    6.80
   4   0   1  102.29    7.10
   0  -4   1   85.99    5.70
   0   4   1   89.69    6.80
  -4   0   1   84.39    6.80
   4   0   1   94.89    6.90
   0  -4   1   90.29    5.60
   4   0  -1   91.19    6.90
   0   4  -1   91.49    5.80
   0   4   1   89.69    6.00
   0   4  -1   89.09    6.80
   4   0  -1   94.49    7.50
   0  -4  -1   90.19    6.80
   0  -4   1   91.99    6.80
  -1   4   1   95.29    7.10
  -1  -4  -1   93.59    6.90
  -4  -1   1   91.39    6.70
  -4  -1   1   92.79    6.90
  -4  -1   1   87.39    7.00
  -1   4   1   95.59    5.60
   1   4  -1   96.19    6.50
   1   4  -1   96.29    4.80
  -4   1  -1   83.59    6.90
   4  -1  -1   92.79    6.90
   4   1   1   86.89    6.90
   4   1   1   84.59    7.30
  -1  -4  -1   90.99    6.40
   4  -1  -1   88.59    7.70
  -4   1  -1   93.99    7.70
   4   1   1   80.29    7.00
  -1   4   1   94.39    6.80
  -1   4   1   88.39    5.40
   1   4  -1   96.79    6.90
  -1   4   1   93.69    7.80
  -4   1  -1  104.19    6.60
   1  -4   1  102.39    6.80
   4  -1  -1   92.39    6.60
  -4  -1  -1   94.29    6.90
   4  -1   1   79.69    6.20
  -4  -1  -1   93.99    7.10
   1  -4  -1   85.29    6.50
  -1   4  -1   90.79    6.70
  -1  -4   1   85.59    6.10
  -1  -4   1   88.99    4.70
  -1  -4   1   86.19    6.70
   1   4   1   85.49    4.90
   4   1  -1   86.59    7.20
  -4   1   1   95.59    7.10
  -4   1   1   88.59    6.50
  -1   4  -1   83.39    6.90
  -1   4  -1   86.09    5.00
   4  -1   1   89.39    7.70
   4  -1   1  100.59    8.10
   4   1  -1   87.19    6.70
   4   1  -1   80.19    6.80
   1   4   1   91.19    6.50
  -4   1   1   98.89    7.70
   1   4   1   80.69    4.80
  -4  -1  -1   92.29    7.10
  -4  -2   1  458.15   24.30
   4   2   1  498.45   23.70
   2  -4   1  474.05   24.10
   4  -2  -1  482.65   24.20
   4  -2  -1  489.65   23.40
  -4   2  -1  500.25   24.50
   4   2   1  507.15   24.20
  -2   4   1  517.75   24.80
  -2  -4  -1  508.25   24.20
  -4  -2   1  516.05   23.60
  -2  -4  -1  477.85   24.10
   2   4  -1  517.95   24.20
  -2   4   1  513.35   22.50
  -4   2  -1  482.05   23.20
   2  -4   1  519.05   24.70
   4   2   1  526.45   25.00
  -4  -2   1  492.05   24.20
  -2   4   1  472.55   22.40
  -2   4   1  521.25   24.60
   2   4  -1  505.95   24.30
   4  -2  -1  494.65   25.50
  -4   2  -1  551.34   25.70
   4  -2   1  486.15   24.30
  -4   2   1  466.25   23.30
  -4  -2  -1  492.85   24.30
  -2   4  -1  503.65   21.70
  -4   2   1  511.35   25.40
   2  -4  -1  479.95   24.50
   2  -4  -1  490.15   24.20
  -2   4  -1  495.65   24.60
  -2   4  -1  456.95   21.60
   2   4   1  492.05   24.20
   4   2  -1  479.55   23.60
  -4  -2  -1  503.55   23.60
   2   4   1  514.15   24.40
  -2  -4   1  469.25   24.00
  -4   2   1  469.25   24.20
   4  -2   1  491.35   25.40
  -2   4  -1  479.15   24.40
   4   2  -1  504.05   24.90
  -2  -4   1  490.55   23.90
  -4  -2  -1  477.15   24.40
   4   2  -1  516.75   24.10
   4  -2   1  479.25   23.10
   3  -4   1  196.78    9.30
   3   4  -1  196.88   11.90
  -4  -3   1  198.08   12.00
  -3  -4  -1  182.78   11.90
   4   3   1  181.78   12.60
   4   3   1  188.28   10.70
  -4   3  -1  192.68   13.00
   4  -3  -1  183.18   11.90
  -3   4   1  171.38   10.00
  -4   3  -1  195.08   10.40
  -4  -3   1  178.08   12.10
  -4  -3   1  198.28   10.50
   3  -4   1  181.68   11.90
   4  -3  -1  182.78   10.60
   4   3   1  199.98   12.00
   4  -3  -1  180.48   13.10
  -3   4   1  201.88   12.40
  -3   4   1  190.08   12.80
   3  -4   1  183.28   13.80
  -4   3  -1  188.88   12.10
  -3  -4  -1  183.58   12.00
   3  -4  -1  189.98   15.00
   4  -3   1  206.18   10.40
  -4  -3  -1  214.78   12.30
   4   3  -1  209.78   12.00
  -3   4  -1  227.68   13.30
  -4  -3  -1  213.68   10.70
  -3  -4   1  197.48   11.90
  -3   4  -1  207.08   12.50
   4  -3   1  202.78   12.20
   3   4   1  211.88    9.10
   3   4   1  212.68   12.20
   3   4   1  219.78   12.90
   3  -4  -1  218.68   12.30
  -3  -4   1  191.78   12.00
   4   3  -1  225.68   13.10
  -4   3   1  219.88   12.60
  -4   3   1  217.28   13.40
  -3   4  -1  207.38    9.40
   4   3  -1  206.48   10.80
  -4   3   1  215.88   10.80
  -4  -3  -1  208.68   12.50
   3  -4  -1  219.48   10.10
   4  -3   1  220.48   13.60
   4   4   1  689.33   32.70
  -4  -4   1  638.04   31.50
  -4  -4   1  653.93   28.90
  -4  -4   1  624.44   31.80
   4  -4  -1  667.63   29.60
  -4  -4  -1  611.54   31.70
  -4   4  -1  643.44   32.00
  -4   4   1  632.24   29.60
   4   4  -1  671.13   31.60
   4   4  -1  636.64   32.40
  -4   4   1  680.83   33.20
   4   4  -1  653.53   29.10
   4  -4   1  620.04   31.60
  -4   4  -1  656.43   29.10
   4   4   1  647.84   29.30
   4  -4  -1  672.73   33.10
   4  -4  -1  627.84   31.60
   4  -4   1  635.74   32.90
   4   4   1  690.83   31.80
  -4   4   1  624.74   31.80
   4  -4   1  666.33   29.10
  -4   4  -1  654.73   33.00
  -4  -4  -1  639.94   29.00
  -4  -4  -1  637.24   31.60
   5   0   1 3870.11  182.18
   5   0  -1 3738.63  185.38
   0  -5  -1 3666.73  179.98
   0   5   1 3762.72  175.78
  -5   0  -1 3958.80  183.28
   0   5  -1 3761.32  180.58
   0   5   1 3883.21  181.38
   0  -5  -1 3615.84  173.78
   0  -5   1 3693.13  172.68
   5   0   1 4390.86  186.98
  -5   0  -1 3636.54  181.18
  -5   0   1 3151.18  179.68
   0   5  -1 3656.33  173.48
   5   0  -1 3752.92  180.48
  -5   0   1 3795.92  181.38
  -1   5   1  531.95   26.30
   5  -1  -1  534.85   25.70
  -1  -5  -1  523.05   25.90
   1   5  -1  513.75   25.80
   1  -5   1  520.55   25.30
   5   1   1  545.05   26.60
  -1   5   1  562.74   25.70
   1   5  -1  530.85   25.20
  -5   1  -1  580.54   27.40
   5  -1  -1  523.75   25.90
  -5   1  -1  524.25   26.20
  -1   5   1  532.65   26.10
   1   5  -1  530.35   23.50
  -5   1  -1  513.95   25.40
  -1   5   1  514.35   24.20
  -1  -5  -1  539.35   25.30
  -5  -1   1  524.85   26.10
  -5  -1   1  592.74   26.40
   5  -1  -1  530.85   27.30
  -5  -1   1  521.75   26.20
  -1   5   1  523.45   24.30
   5   1   1  512.55   26.00
   5   1   1  532.05   26.40
  -1  -5   1  494.15   25.80
   5   1  -1  521.55   25.90
   5  -1   1  496.15   25.90
  -1   5  -1  511.75   26.10
   1   5   1  496.75   23.60
  -5   1   1  545.75   27.10
  -1  -5   1  527.45   25.00
   5   1  -1  503.55   26.20
  -5  -1  -1  540.45   26.20
   1   5   1  505.15   23.60
   5  -1   1  498.95   25.40
  -5  -1  -1  512.35   26.10
  -1   5  -1  505.55   25.40
   5   1  -1  539.05   26.50
  -1   5  -1  520.35   26.20
   5  -1   1  511.65   27.00
   1   5   1  514.45   25.30
  -5  -1  -1  506.45   26.00
  -1   5  -1  517.65   23.80
  -1  -5   1  516.35   23.40
   1   5   1  512.25   25.90
   1  -5  -1  510.35   25.40
  -5   1   1  505.85   26.00
   2   5  -1  357.66   19.00
   5  -2  -1  333.07   18.20
   2  -5   1  343.37   19.00
   5  -2  -1  332.87   18.90
  -2  -5  -1  357.86   18.80
   5   2   1  345.07   19.00
  -2   5   1  336.47   19.10
  -2   5   1  325.07   19.10
   5  -2  -1  342.47   20.40
   5   2   1  347.57   19.70
  -2   5   1  334.17   16.70
   5   2   1  346.17   18.70
   2   5  -1  345.97   18.80
  -5   2  -1  391.36   20.70
  -2   5   1  348.97   16.80
  -5  -2   1  324.77   19.10
  -5   2  -1  322.27   17.90
  -5  -2   1  358.76   19.20
  -5  -2   1  358.86   18.50
  -2  -5  -1  327.17   18.70
  -5   2  -1  362.16   19.40
   2   5   1  400.56   19.40
  -5   2   1  358.36   18.30
   5  -2   1  378.86   18.20
   2   5   1  383.06   19.20
  -2   5  -1  356.16   19.30
   5  -2   1  347.57   20.30
   5   2  -1  350.76   18.90
  -5  -2  -1  377.96   19.60
   5   2  -1  378.06   18.90
   5  -2   1  358.46   19.20
  -5   2   1  373.46   20.50
  -2   5  -1  374.26   19.60
  -2   5  -1  377.46   16.10
  -5  -2  -1  352.56   19.20
  -5  -2  -1  371.56   18.60
  -2   5  -1  350.76   16.00
   5   2  -1  379.36   20.00
   2  -5  -1  380.96   19.40
  -2  -5   1  389.26   18.80
  -5   2   1  363.56   19.30
  -2  -5   1  370.06   19.10
  -3   5   1 1153.38   55.99
   3   5  -1 1198.08   55.89
   3  -5   1 1206.78   56.49
  -3   5   1 1164.18   53.09
   5  -3  -1 1157.48   55.69
  -5   3  -1 1140.19   53.99
  -5   3  -1 1243.68   57.49
   3   5  -1 1214.28   55.59
   3  -5   1 1086.99   55.39
  -3  -5  -1 1107.29   55.49
   5  -3  -1 1151.48   54.29
  -5  -3   1 1198.78   54.29
  -5  -3   1 1116.29   55.89
   5   3   1 1197.18   56.59
  -3   5   1 1263.07   56.79
  -3  -5  -1 1171.38   55.69
   5  -3  -1 1186.88   57.29
   5   3   1 1157.58   54.59
  -5   3  -1 1171.68   55.99
  -5  -3   1 1175.68   55.69
   5   3   1 1191.88   55.59
  -3   5   1 1144.99   53.09
   5   3  -1 1295.67   55.79
   5   3  -1 1238.08   54.79
  -3   5  -1 1304.97   56.89
  -3  -5   1 1204.68   55.69
   5  -3   1 1258.17   57.59
  -5   3   1 1344.47   57.89
   5  -3   1 1233.38   54.09
  -5  -3  -1 1210.98   55.89
  -5  -3  -1 1244.28   54.49
  -5   3   1 1262.87   54.49
  -3  -5   1 1212.58   55.59
   3  -5  -1 1232.18   56.59
   3   5   1 1265.77   55.89
   5  -3   1 1233.38   55.99
  -5   3   1 1197.08   55.89
  -5  -3  -1 1204.78   56.19
   5   3  -1 1284.67   56.89
   3  -5  -1 1197.68   55.69
   3   5   1 1296.37   56.39
  -3   5  -1 1243.98   52.09
  -3   5  -1 1279.47   56.49
  -4   5   1  481.95   24.80
   4   5  -1  473.45   23.20
   5   4   1  443.26   21.00
   5  -4  -1  452.85   21.10
  -4   5   1  408.66   23.30
   5   4   1  472.75   24.50
   5  -4  -1  399.36   22.80
   4  -5   1  427.26   24.20
  -4  -5  -1  429.56   23.20
  -5   4  -1  426.26   20.60
  -4  -5  -1  437.86   23.00
   4   5  -1  418.66   23.70
  -5  -4   1  440.56   20.60
  -5  -4   1  417.26   23.30
   4  -5   1  412.16   22.90
  -5  -4   1  401.76   22.80
  -4   5   1  431.56   20.20
  -5   4  -1  455.65   23.70
  -5   4  -1  449.46   24.80
   5   4   1  456.55   23.20
   5  -4  -1  400.26   24.30
   5   4  -1  425.96   24.00
   4  -5  -1  452.25   20.20
  -5  -4  -1  422.76   20.60
   4   5   1  442.26   23.00
  -5  -4  -1  423.06   23.30
  -4   5  -1  439.36   24.40
   4  -5  -1  434.96   24.20
  -4  -5   1  419.56   23.00
   4  -5  -1  394.26   22.70
   5   4  -1  422.86   20.90
   5  -4   1  408.86   23.00
  -5  -4  -1  430.46   23.10
   5  -4   1  440.56   20.60
  -4  -5   1  407.06   22.70
   5  -4   1  422.96   24.60
  -5   4   1  430.56   21.00
   4   5   1  462.75   24.10
  -4   5  -1  462.55   23.90
   5   4  -1  438.76   22.90
  -4   5  -1  414.56   19.40
  -5   4   1  462.65   24.90
  -5   4   1  415.36   23.30
   5  -5  -1  160.18    8.90
  -5  -5  -1  132.79   11.70
   5   5   1  169.38   12.10
   5   5  -1  152.98   13.10
   5  -5   1  166.38    8.30
  -5  -5  -1  142.09    7.80
  -5   5   1  167.48   12.50
   5  -5   1  152.38   11.70
   5   5   1  144.89    8.20
  -5   5  -1  160.28   12.50
  -5   5   1  150.48   13.40
   5   5   1  157.38   13.10
   5   5  -1  159.28   11.80
  -5  -5   1  142.29   11.80
  -5  -5   1  147.09   11.80
  -5  -5   1  149.09    7.50
   5  -5  -1  149.69   11.70
  -5   5  -1  169.18   13.80
  -5   5  -1  152.18    8.30
  -5  -5   1  145.39    7.40
  -5  -5  -1  157.38   12.10
   5  -5  -1  150.58   13.40
   5  -5   1  146.69   13.30
  -5   5   1  136.99    8.80
   6   0   1  306.67   17.60
  -6   0  -1  288.97   17.20
   0  -6   1  300.97   15.60
   0  -6  -1  306.37   15.80
   0   6   1  293.47   16.00
   6   0   1  304.77   18.50
  -6   0  -1  326.37   18.40
   6   0  -1  339.77   18.10
   6   0  -1  296.87   18.40
  -6   0  -1  285.67   17.60
   6   0   1  282.57   17.40
   0   6  -1  315.87   17.60
   0   6  -1  325.17   17.90
   0   6  -1  304.17   15.70
   0   6   1  312.47   17.60
   0   6  -1  300.77   15.80
   0   6   1  306.77   15.90
   0  -6   1  312.47   15.50
  -6   0   1  315.87   17.70
   0  -6  -1  306.87   15.80
  -6   0   1  308.17   18.30
  -6   0   1  309.47   17.50
   6   0  -1  305.37   17.40
  -6  -1   1 1025.40   46.20
   1  -6   1  941.31   44.70
   1   6  -1  996.20   45.80
   6  -1  -1  940.01   45.60
  -6   1  -1  985.10   47.10
   6  -1  -1  944.51   47.10
  -6   1  -1  888.81   44.90
  -1  -6  -1  933.51   45.60
  -1   6   1  971.30   43.60
   6   1   1  961.80   46.30
   6   1   1  929.01   45.70
   1   6  -1  972.90   44.70
  -1   6   1 1003.20   46.10
   6  -1  -1  977.70   45.50
  -6   1  -1  970.90   46.10
  -1   6   1 1022.80   43.80
   1   6  -1  962.00   42.80
   6   1   1 1031.90   46.50
  -6  -1   1  919.21   45.70
  -1   6   1 1025.10   45.20
  -1  -6  -1  958.80   44.70
  -1   6   1  997.60   46.20
  -6  -1   1  965.90   45.90
  -1   6  -1  990.40   46.00
  -1  -6   1  924.01   45.50
   1   6   1  936.61   42.90
  -6  -1  -1  942.01   45.90
   6   1  -1  967.10   45.70
  -1   6  -1  965.80   46.10
   6  -1   1  941.91   45.20
  -1   6  -1  978.00   45.00
   6   1  -1  958.20   46.20
  -6  -1  -1 1031.60   46.20
   1   6   1  997.20   45.00
   1   6   1  977.30   43.00
  -6  -1  -1  928.51   45.80
   6  -1   1  939.41   47.00
  -1   6  -1  945.51   43.10
  -1  -6   1  980.50   44.50
   1  -6  -1  967.30   45.00
  -1   6  -1  969.00   43.20
  -6   1   1  976.10   46.90
  -1  -6   1  967.30   42.70
  -6   1   1  949.80   45.90
  -6   1   1  957.70   45.30
   1   6   1  998.80   45.90
   6  -1   1  975.60   45.90
   6   1  -1  989.40   46.40
  -2   6   1  365.66   20.00
  -6  -2   1  334.47   19.60
  -6   2  -1  350.66   18.60
  -6   2  -1  377.16   21.50
  -2   6   1  344.77   16.90
   6   2   1  348.37   20.60
  -2   6   1  362.96   17.00
   2   6  -1  366.26   19.40
   6   2   1  362.56   19.80
   6  -2  -1  351.06   21.30
   6   2   1  353.36   19.80
  -6   2  -1  332.87   19.90
  -2  -6  -1  353.86   19.00
  -2   6   1  359.86   19.70
  -6  -2   1  355.26   19.30
  -6  -2   1  310.47   19.50
   6  -2  -1  341.57   19.50
   6  -2  -1  337.47   20.30
  -2  -6  -1  331.57   19.40
   2   6  -1  368.06   19.70
  -2   6   1  362.86   20.20
  -2   6  -1  335.87   19.80
  -6   2   1  366.86   21.10
   6  -2   1  352.56   21.30
   2   6   1  366.16   19.80
  -6  -2  -1  355.26   20.00
   6  -2   1  348.37   18.60
  -2   6  -1  354.06   19.70
   2  -6  -1  377.66   21.60
  -2  -6   1  382.26   19.10
   2   6   1  360.06   19.50
  -2   6  -1  356.96   16.10
   6   2  -1  322.87   20.20
  -6   2   1  347.17   19.90
   6   2  -1  380.36   19.80
  -6  -2  -1  311.37   19.60
  -2  -6   1  335.97   19.50
  -6  -2  -1  347.97   19.20
   6   2  -1  360.56   19.70
  -6   2   1  369.56   19.00
  -2   6  -1  361.06   19.90
   6  -2   1  376.06   20.10
  -2   6  -1  337.27   16.10
  -3  -6  -1  138.69   10.90
   6  -3  -1  124.19   12.40
   6  -3  -1  145.29    9.70
  -3   6   1  142.39    7.80
   6  -3  -1  137.89   10.90
  -3   6   1  127.99    7.60
   6   3   1  137.69   10.30
  -6  -3   1  135.69    9.70
  -3   6   1  141.49   11.30
  -6  -3   1  150.88   11.40
   3   6  -1  150.58   11.40
  -6   3  -1  133.49    9.30
  -3   6   1  147.39   11.70
   3   6  -1  149.69   11.20
  -6   3  -1  136.59   12.40
  -3   6   1  135.39   11.50
  -3  -6  -1  139.29   10.80
   6   3   1  129.69   10.80
   3  -6   1  142.49   11.40
  -6   3  -1  139.39   11.50
  -6  -3   1  125.99   11.10
   6   3   1  154.08   12.50
   6  -3   1  129.09   10.90
  -6  -3  -1  160.28   11.60
  -3  -6   1  152.08   11.20
  -6   3   1  143.99   12.40
   6   3  -1  134.99   10.30
   6   3  -1  146.09   11.00
  -6   3   1  148.89   11.60
  -6  -3  -1  126.39   11.00
  -6  -3  -1  150.88   10.00
   6   3  -1  134.29   11.80
   6  -3   1  142.69   12.80
   3  -6  -1  138.39   11.50
   3   6   1  148.79   11.10
  -3   6  -1  166.98   12.10
  -6   3   1  148.39    9.70
  -3   6  -1  149.88   11.80
   6  -3   1  134.59    9.40
  -3  -6   1  135.29   10.50
   3   6   1  136.49   11.20
  -4  -6  -1   59.19    8.30
  -6   4  -1   63.89    8.20
   6   4   1   65.09    6.80
  -6  -4   1   63.19    6.30
   4   6  -1   50.09    7.80
  -4  -6  -1   64.19    7.80
  -6   4  -1   65.49    6.10
   4   6  -1   58.29    7.50
  -4   6   1   66.39    4.80
   6   4   1   59.39    7.70
  -6   4  -1   72.59   11.30
  -6  -4   1   64.89    8.40
  -4   6   1   63.09    8.80
  -4   6   1   68.29    8.60
  -4   6   1   68.49    4.90
  -6  -4   1   72.79   13.20
   6  -4  -1   49.30    8.40
   6  -4  -1   69.49    8.10
   6  -4  -1   63.99    6.40
   4  -6   1   59.69    8.50
   6   4   1   70.59    9.30
  -6  -4  -1   73.59    9.10
   6   4  -1   64.09    6.90
  -4  -6   1   74.09    8.50
  -4   6  -1   64.39    8.60
   4   6   1   63.69    8.40
  -6  -4  -1   71.89    6.40
  -4   6  -1   96.59   10.90
  -6   4   1   71.69   11.20
  -4  -6   1   52.39    7.30
   4  -6  -1   63.89    8.80
  -6   4   1   72.09    6.50
   6  -4   1   70.89    6.30
   6  -4   1   66.89    9.30
  -6   4   1   79.39    9.50
   6  -4   1   69.59   10.10
   6   4  -1   82.69    8.80
   4  -6  -1   71.69    8.40
   6   4  -1   51.79    8.20
   4   6   1   72.59   10.10
  -5  -6  -1   40.70    7.20
  -6   5  -1   50.69    5.00
  -5   6   1   45.90    8.50
   6   5   1   59.59    9.60
   6  -5  -1   54.99    5.60
  -6  -5   1   38.50    7.00
   6   5   1   60.69    8.50
   5   6  -1   57.79    8.20
  -5   6   1   39.50    7.60
   6  -5  -1   64.29    8.50
   5  -6   1   48.00    7.30
   6   5   1   50.39    5.40
   5  -6   1   39.10    7.90
   5   6  -1   63.19    9.00
  -5   6   1   54.59    4.60
  -6   5  -1   52.39    9.70
  -6   5  -1   60.59    9.00
   6  -5  -1   43.90    8.80
  -6  -5   1   52.29    4.90
  -5  -6  -1   64.79    8.90
  -6  -5   1   58.99    8.70
   5   6   1   73.59   10.00
   5  -6  -1   37.90    6.70
  -5   6  -1   51.09    3.20
  -6   5   1   48.40    7.80
  -5  -6   1   44.90    7.80
  -6   5   1   69.89   10.40
  -6  -5  -1   54.19    8.00
  -5  -6   1   44.50    7.30
   6  -5   1   49.00    9.10
  -6  -5  -1   68.09    9.20
   5  -6  -1   65.99   10.00
  -5   6  -1   51.39    3.20
  -5   6  -1   45.10    7.80
   6   5  -1   51.19    8.40
   5   6   1   63.59    8.80
  -5   6  -1   67.89   11.90
   6   5  -1   59.79    7.90
   6   5  -1   52.09    5.50
  -6  -5  -1   48.70    4.90
  -6   5   1   55.79    5.50
   6  -5   1   53.69    5.30
   6  -5   1   34.80    6.70
  -6   6  -1 1128.69   50.79
   6  -6  -1 1094.09   57.29
  -6  -6  -1 1112.29   55.49
  -6   6   1 1090.09   51.49
  -6   6  -1 1203.18   58.09
   6  -6   1 1037.20   56.89
  -6  -6   1 1114.89   57.79
  -6   6  -1 1121.49   56.39
   6  -6   1 1263.27   50.79
   6   6   1 1247.68   57.59
  -6  -6   1 1128.59   55.49
   6   6  -1 1191.98   57.09
  -6   6   1 1178.28   58.19
   6  -6  -1 1227.78   51.59
  -6   6   1 1142.99   56.19
   0   7   1  177.08   10.80
   7   0   1  165.88   12.40
   0   7  -1  163.78   12.40
   0   7   1  171.78   13.00
   7   0   1  169.08   12.70
   0   7  -1  157.28   10.30
   0  -7  -1  163.18   10.20
  -7   0   1  163.08   12.10
   7   0   1  147.39   13.40
  -7   0   1  135.59   12.20
  -7   0  -1  168.38   13.20
   0   7  -1  180.18   12.90
  -7   0  -1  165.68   12.30
   0  -7  -1  168.38   10.20
   7   0  -1  179.38   13.80
   7   0  -1  163.28   12.70
   0  -7   1  171.68   10.00
   7   0  -1  146.39   11.90
  -7   0   1  164.78   13.20
   0   7  -1  167.28   10.40
   0  -7   1  170.08   10.20
   0   7   1  164.18   10.40
   0   7   1  151.18   12.30
  -7   0  -1  160.18   12.60
  -7   1  -1  255.67   16.70
  -1   7   1  264.97   17.00
  -1   7   1  260.47   13.90
  -1   7   1  246.38   13.80
   1   7  -1  254.77   16.20
   7  -1  -1  246.28   16.00
   7  -1  -1  254.87   18.00
  -7  -1   1  237.08   16.20
  -1  -7  -1  266.37   14.90
  -7   1  -1  263.37   17.70
   7   1   1  236.28   16.90
   7   1   1  271.77   17.20
  -7   1  -1  272.57   16.00
   1   7  -1  257.27   12.90
   1   7  -1  249.08   16.30
  -7  -1   1  275.67   17.00
   7  -1  -1  279.87   16.60
  -1  -7  -1  238.68   16.20
  -1   7   1  247.18   16.40
   7   1   1  241.08   16.30
  -7  -1   1  249.78   16.50
   1  -7   1  268.77   15.30
  -1   7  -1  259.17   13.40
   7   1  -1  245.98   17.00
  -1   7  -1  264.57   13.50
   1   7   1  256.17   15.30
  -1  -7   1  266.27   14.70
  -7  -1  -1  272.27   17.00
  -1  -7   1  265.97   12.80
  -7  -1  -1  245.68   16.30
  -7  -1  -1  249.78   16.70
   7  -1   1  278.07   16.80
   7   1  -1  254.77   17.00
   7  -1   1  276.77   16.40
   1   7   1  259.27   13.20
   1   7   1  273.27   16.70
  -7   1   1  280.77   17.90
  -1  -7   1  264.07   16.60
  -7   1   1  281.87   16.30
  -1   7  -1  256.77   16.90
   1  -7  -1  269.57   15.40
  -1   7  -1  267.97   16.60
  -7   1   1  256.57   16.70
   1   7   1  258.07   13.00
   7   1  -1  259.57   16.30
   7  -1   1  249.38   17.90
  -7  -2   1  193.88   13.80
  -7  -2   1  176.18   13.90
   7   2   1  176.78   13.60
  -2   7   1  176.38   10.00
   7  -2  -1  173.58   15.00
  -2   7   1  193.78   13.30
  -7  -2   1  203.58   13.30
   7  -2  -1  173.18   13.10
  -7   2  -1  222.78   17.70
   2  -7   1  182.58   12.80
  -2  -7  -1  203.78   12.50
   2   7  -1  181.28   12.60
  -7   2  -1  177.28   12.20
  -2   7   1  182.58   10.00
   7   2   1  207.28   15.50
   7   2   1  194.88   14.50
  -2   7   1  182.08   13.90
   7  -2  -1  195.08   12.90
  -2  -7  -1  177.98   13.20
  -7   2  -1  178.88   13.80
   7  -2   1  178.78   15.20
   7   2  -1  181.68   14.30
  -2   7  -1  189.48   15.50
  -2   7  -1  179.68    9.10
  -2  -7   1  155.08   12.90
  -7  -2  -1  189.98   13.70
  -2   7  -1  168.48   13.50
  -7   2   1  178.88   13.70
  -2  -7   1  179.48   12.00
   2   7   1  180.08   12.80
  -7  -2  -1  199.08   13.20
   7  -2   1  166.08   16.00
   7   2  -1  192.18   13.40
   2   7   1  161.58   16.00
   7   2  -1  168.98   13.30
  -7  -2  -1  176.68   13.70
  -2   7  -1  173.68   12.90
  -2   7  -1  164.38    9.00
   2  -7  -1  175.78   12.90
  -7   2   1  197.88   16.60
  -7   2   1  167.68   12.30
   7  -2   1  159.88   12.00
  -3   7   1  548.55   26.10
  -3   7   1  614.14   31.40
  -3   7   1  598.84   31.00
  -7   3  -1  655.73   33.20
   7  -3  -1  603.54   32.80
  -3  -7  -1  559.74   30.10
   7   3   1  597.54   30.50
  -7  -3   1  606.14   31.00
   7  -3  -1  593.34   28.90
   7  -3  -1  614.84   30.60
  -7  -3   1  590.04   30.60
   3  -7   1  595.04   30.60
  -3   7   1  577.34   30.60
  -7  -3   1  679.93   29.80
  -7   3  -1  583.44   30.90
   3   7  -1  607.94   30.50
  -3  -7  -1  590.44   29.80
  -3   7   1  591.64   26.30
   7   3   1  602.04   31.70
  -7   3  -1  589.84   28.80
   3   7  -1  602.14   30.50
   7   3   1  563.84   29.60
   7  -3   1  560.44   30.50
   7   3  -1  580.14   31.70
  -7  -3  -1  508.75   30.20
  -3   7  -1  572.64   30.80
   3   7   1  609.34   30.60
  -3   7  -1  596.34   31.20
   3   7   1  566.64   30.30
   7  -3   1  496.35   31.80
   3  -7  -1  562.34   30.50
   7  -3   1  552.84   28.50
  -3  -7   1  545.15   29.30
  -3   7  -1  569.64   30.60
  -7  -3  -1  591.04   29.30
  -7   3   1  547.55   28.80
   7   3  -1  516.35   29.40
  -7  -3  -1  547.85   30.40
  -7   3   1  569.94   32.10
   7   3  -1  569.44   30.10
  -3  -7   1  544.95   30.10
  -7   3   1  568.04   30.70
  -4   7   1  100.89    5.90
  -7   4  -1  104.29    8.60
   7  -4  -1   81.19    9.70
   7   4   1  120.29   13.20
  -7  -4   1   97.49   10.70
   7   4   1  116.59    9.80
   7   4   1   85.19    9.90
  -4   7   1   97.09   11.10
   4   7  -1   97.79   10.40
   4  -7   1  126.29   12.80
  -4   7   1  106.79    6.10
  -7   4  -1  100.09   11.50
   7  -4  -1  100.79    8.90
  -7   4  -1   95.99   11.90
  -7  -4   1  115.69    9.50
   4   7  -1  116.99   12.10
  -4   7   1  103.49   11.20
   7  -4  -1  116.39   13.80
  -4  -7  -1  109.79   11.10
  -7  -4   1  107.19   11.30
  -4   7   1  113.49   11.80
  -7   4   1   95.49    8.60
  -7  -4  -1  109.19    8.80
   4   7   1  124.39   11.90
   7   4  -1  111.19   12.60
   7  -4   1  115.69   11.70
   7  -4   1  105.59    8.60
   7   4  -1  110.89   10.90
  -7   4   1  129.39   13.20
   7  -4   1  104.29   12.80
  -4  -7   1  108.29   10.60
  -4   7  -1  102.49   11.50
   7   4  -1  101.59    9.50
  -4  -7   1  109.19   11.10
  -7  -4  -1  108.59   11.60
  -7   4   1  127.09   12.70
  -7  -4  -1   93.49   10.80
   4  -7  -1  113.09   11.90
   4   7   1  118.29   11.80
  -4   7  -1  121.99   12.20
   5   7  -1   79.09   10.90
  -5   7   1   82.39   10.80
  -7  -5   1   75.59    6.70
   7  -5  -1   72.99    7.40
   5  -7   1   86.79   11.70
  -7   5  -1   70.29    6.90
   7   5   1   72.39    7.40
  -5  -7  -1   91.39   10.20
  -5   7   1   77.09    4.90
  -5   7   1   71.99    4.80
  -7  -5   1   65.89   10.00
   7   5  -1   72.59    7.50
  -7  -5  -1   69.09   11.30
  -7  -5  -1   80.79    6.80
  -5  -7   1   76.19    9.70
   7  -5   1   70.59    6.90
  -5   7  -1   84.99   16.40
  -5   7  -1   86.99   11.30
  -7   5   1   69.79   10.20
   5  -7  -1   81.69   11.20
  -7   5   1   76.29    7.30
  -5  -7   1   77.49   10.10
   5   7   1   69.99    9.80
   6  -7   1    1.00    6.80
  -7   6  -1    2.90    2.80
  -7  -6   1    1.40    1.90
  -7  -6   1    3.60    1.90
   7  -6  -1    2.20    3.30
   7   6   1    3.90    2.70
  -6   7   1    3.70    2.20
  -7   6  -1    5.40    6.50
   6   7  -1   -2.00    5.90
   7   6   1   10.20    7.70
   7  -6  -1    8.50    7.80
  -6   7   1    4.20    2.40
  -6   7   1    8.80    6.60
  -6  -7  -1    5.50    6.30
  -7  -6   1    0.40    6.00
   6  -7  -1    5.10    7.10
   7   6  -1    7.30    7.40
  -7   6   1    4.30    6.00
   7  -6   1    5.50    2.90
   7  -6   1    7.50    7.70
  -7  -6  -1    2.80    2.20
  -7  -6  -1    7.60    6.50
  -6  -7   1    6.40    6.60
   6   7   1    2.40    7.10
  -6   7  -1   -1.00    6.30
  -7   6   1    4.70    3.20
   7   7  -1   11.80    8.20
  -7  -7   1   15.80    7.40
   7   7   1    4.40    7.40
  -7   7  -1   12.90    7.70
  -7   7   1   17.10    3.30
  -7  -7  -1    8.30    6.80
   7  -7   1   15.30    9.00
  -7   7   1   17.20    7.90
   7  -7  -1   22.00    9.20
   8   0   1  949.51   45.50
   0  -8  -1  911.31   42.50
   0   8  -1  995.20   46.20
   0   8   1  935.91   42.80
  -8   0  -1  847.02   45.60
   8   0  -1  932.91   45.60
   0   8   1  952.40   45.90
   8   0  -1  877.31   46.50
   0   8   1  926.41   45.50
   8   0  -1  925.31   45.10
   0   8  -1  949.60   45.50
  -8   0  -1  884.51   45.30
  -8   0   1  923.41   45.40
   8   0   1  888.91   46.60
   0   8  -1  863.61   42.30
   0  -8   1  953.50   42.50
   8   0   1  894.81   45.30
   0  -8   1  881.41   44.30
   0   8  -1  931.61   42.70
  -1   8   1   11.50    4.70
  -1  -8  -1   15.40    4.50
   1   8  -1   16.40    2.90
   1  -8   1   13.40    5.30
   1   8  -1   17.70    4.90
  -8   1  -1   10.10    5.10
   8  -1  -1   11.40    5.30
  -8  -1   1   19.20    6.40
  -1  -8  -1   13.60    6.00
   8   1   1   19.60    5.80
  -1   8   1   10.40    5.60
   8  -1  -1   14.10    5.50
  -1   8   1   13.40    5.70
   1   8  -1   15.60    5.80
  -1   8   1   14.90    3.90
   8  -1  -1   27.30    8.20
  -8  -1   1   17.70    6.20
  -1   8   1   12.40    3.80
  -8   1  -1   20.30    6.90
  -8   1  -1   20.10    7.30
   8   1   1   19.70    6.70
  -8  -1   1   15.00    5.60
   8   1   1   15.60    6.50
  -8   1   1   17.40    5.60
   1   8   1   13.80    2.90
  -8  -1  -1   12.70    5.70
   8   1  -1   17.10    6.60
   8  -1   1   13.90    5.60
   8  -1   1   18.40    7.80
  -1   8  -1   10.90    4.60
   8  -1   1   12.00    5.40
  -1   8  -1   19.90    7.00
   1   8   1   13.60    4.90
   8   1  -1   13.80    6.50
   8   1  -1   16.60    6.00
  -1   8  -1   18.20    3.60
  -1   8  -1   17.50    6.00
  -1  -8   1   12.30    4.10
  -8   1   1   20.00    7.10
   1   8   1   16.00    3.10
   1   8   1   12.10    5.40
  -8   1   1   23.80    7.70
  -8  -1  -1   11.80    5.30
  -1   8  -1   16.90    3.50
  -8  -1  -1   19.50    6.60
  -2   8   1  376.86   21.70
  -2  -8  -1  359.76   21.90
  -8  -2   1  390.76   22.00
  -2   8   1  334.57   17.90
   2   8  -1  386.16   22.40
  -2   8   1  414.46   23.30
  -2   8   1  369.36   24.30
  -8   2  -1  372.66   21.00
   8  -2  -1  352.16   21.80
   8   2   1  373.46   22.20
  -8   2  -1  381.06   24.00
   8   2   1  393.16   23.70
  -2   8   1  362.86   18.10
  -8  -2   1  354.56   22.20
   8   2   1  349.77   22.20
   2  -8   1  378.76   21.20
   2   8  -1  353.76   21.00
   8  -2  -1  338.07   21.00
  -8   2  -1  358.16   22.50
   8  -2  -1  339.47   23.90
  -8  -2   1  354.36   22.30
  -2  -8  -1  363.46   20.40
   2  -8  -1  372.36   21.40
  -8  -2  -1  389.26   22.60
  -2   8  -1  391.56   23.00
  -2   8  -1  352.06   17.10
  -2  -8   1  346.77   21.80
  -8   2   1  397.06   24.20
  -8   2   1  363.16   22.50
  -2  -8   1  368.46   20.40
  -2   8  -1  380.26   21.70
  -2   8  -1  358.56   17.10
  -8  -2  -1  364.36   22.50
   8   2  -1  391.66   22.20
   8  -2   1  395.76   25.00
   8  -2   1  361.46   21.10
   8   2  -1  335.77   22.10
  -8   2   1  355.26   21.00
  -8  -2  -1  399.36   22.20
   2   8   1  364.96   25.40
   8  -2   1  371.46   22.20
   8   2  -1  424.46   24.10
   2   8   1  377.56   21.40
   8   3   1  346.47   21.00
   8  -3  -1  319.77   26.00
  -3   8   1  335.37   16.20
  -3  -8  -1  355.86   29.40
  -3   8   1  358.76   22.00
  -8   3  -1  357.96   22.50
   3  -8   1  359.76   21.40
   3   8  -1  346.07   21.20
  -3   8   1  364.56   16.40
  -3  -8  -1  358.06   20.60
  -8  -3   1  363.06   22.00
  -8  -3   1  399.06   20.90
  -8   3  -1  324.07   19.40
   8   3   1  393.66   23.70
   8  -3  -1  359.26   20.00
   8  -3   1  344.17   19.70
  -3  -8   1  326.27   21.30
   3   8   1  333.27   21.10
  -8  -3  -1  344.17   21.80
   8   3  -1  318.57   20.80
  -8   3   1  336.87   19.80
   8   3  -1  359.96   24.90
  -3  -8   1  325.27   20.00
  -8   3   1  349.07   22.00
  -8  -3  -1  353.76   20.50
   3  -8  -1  347.87   21.50
  -3   8  -1  304.17   21.20
   8  -3   1  321.57   26.00
  -8   4  -1  209.78   13.90
   8   4   1  204.18   15.00
   4   8  -1  183.38   16.30
   8  -4  -1  219.18   14.20
  -8  -4   1  223.08   16.60
  -4  -8  -1  211.48   17.10
  -4  -8  -1  214.98   15.60
   4  -8   1  202.48   16.70
   8   4   1  219.18   17.90
  -8  -4   1  218.58   14.40
  -4   8   1  226.78   21.30
  -8   4  -1  207.58   17.00
  -4   8   1  221.58   17.50
   8  -4  -1  216.18   19.10
   8   4  -1  243.18   18.60
  -4   8  -1  220.68   17.50
   8   4  -1  230.18   15.40
  -8   4   1  204.98   14.10
  -4   8  -1  234.58   17.70
  -8  -4  -1  224.78   17.00
   4  -8  -1  216.28   16.90
  -8  -4  -1  228.68   14.50
   4   8   1  213.68   16.70
  -4  -8   1  219.68   15.60
   8  -4   1  226.88   19.30
  -8   4   1  237.98   17.50
   8  -4   1  220.98   14.00
  -4  -8   1  230.78   16.80
   8   5   1   31.90    8.90
  -8   5  -1   57.39    6.60
   8  -5  -1   52.89    6.90
  -8  -5   1   37.90    8.80
   8  -5  -1   43.00   11.10
   5  -8   1   48.50   10.20
  -5   8   1   41.00    9.20
  -8  -5   1   52.29    6.40
   8   5   1   46.60    7.80
  -8   5  -1   45.10    9.70
  -5  -8  -1   48.60    9.00
  -5  -8   1   49.10    9.60
  -8  -5  -1   47.90    6.30
   8   5  -1   48.40    7.20
  -8  -5  -1   42.30    9.10
   8  -5   1   58.89   11.50
  -8   5   1   56.99   10.30
  -8   5   1   45.20    6.30
  -5   8  -1   35.80    9.10
   5   8   1   50.49    9.80
   8  -5   1   49.00    9.90
   8   5  -1   47.40   10.40
   5  -8  -1   40.90    9.50
  -8   6  -1    7.10    3.50
   8   6   1    8.00    3.90
  -6   8   1    3.40    8.00
  -6  -8  -1    1.50    6.90
  -8  -6   1    8.30    3.20
   6  -8   1   -0.90    6.90
   8  -6  -1   14.10    4.40
  -8  -6   1   15.70    7.70
   6   8  -1   13.50    8.30
   8  -6  -1    9.00    8.00
   8   6   1    4.20    8.20
  -8   6  -1   12.20    7.80
  -6   8  -1    7.90    7.10
   8   6  -1    9.00    8.40
   8  -6   1    5.80    8.80
   6   8   1    7.40    7.90
  -8   6   1    6.80    7.40
  -6  -8   1   13.90    7.60
  -8  -6  -1    9.10    6.90
  -8   6   1    8.30    4.00
   6  -8  -1    7.90    7.30
  -8  -6  -1   10.00    3.30
   8  -6   1   14.70    4.00
  -7  -8  -1  171.48   17.20
   7  -8   1  184.48   18.80
  -8  -7   1  171.18   16.90
   7   8  -1  172.18   18.40
   8  -7  -1  150.48   17.70
   8  -7  -1  201.78   10.60
  -8   7  -1  173.38    9.10
  -8   7  -1  172.38   17.70
  -7   8   1  177.58   17.70
   8   7   1  186.78   18.90
   8   7  -1  190.78   19.20
  -7  -8   1  167.98   16.70
  -8  -7  -1  179.58   17.20
   7   8   1  185.98   19.40
  -8   7   1  158.58   10.40
  -8   7   1  183.28   17.80
  -7   8  -1  176.78   17.80
   7  -8  -1  156.08   18.20
   8  -7   1  138.79   17.20
  -8   8  -1  427.56   28.90
   8  -8   1  389.56   29.80
  -8  -8  -1  419.96   28.30
   8   8  -1  428.86   29.90
  -8   8   1  442.66   29.00
   8   8   1  434.96   29.90
   8  -8  -1  415.56   30.20
  -8  -8   1  440.76   28.40
  -9   0  -1   50.89    9.60
   0   9   1   33.50    5.60
   0  -9   1   37.90    5.30
   9   0  -1   31.30    8.30
  -9   0   1   37.90    8.30
   0   9  -1   34.50    5.40
  -9   0  -1   29.40    7.00
   9   0   1   34.90    8.10
   0   9   1   32.30    8.60
  -9   0   1   39.10    7.90
   9   0  -1   35.00    9.40
   0   9   1   27.90    5.80
  -9   0  -1   37.60    8.80
  -9   0   1   25.70    7.40
   0   9   1   32.50    5.80
   0   9  -1   28.00    7.70
   9   0   1   37.50    9.30
  -9   1  -1   24.90    6.80
  -1   9   1   15.60    4.20
   9   1   1   16.60    7.20
  -9   1  -1   22.40    7.90
   1  -9   1   15.20    5.40
   1   9  -1   21.70    5.60
   1   9  -1   18.40    2.80
   1   9  -1   18.10    2.80
   9   1   1   14.50    7.80
  -9  -1   1   23.70    7.60
  -1   9   1   16.90    4.30
   1   9  -1   20.20    7.20
  -1   9   1    9.40    5.10
  -9  -1   1    8.10    6.80
   9  -1  -1    9.30    6.10
  -1  -9  -1   21.80    5.00
  -1   9   1   14.90    6.90
   9   1  -1   13.50    7.10
   1   9   1   14.60    5.40
  -1   9  -1   20.80    4.00
   1   9   1   16.90    7.80
  -9  -1  -1   15.80    7.30
   9  -1   1   14.60    6.80
   1  -9  -1   14.60    5.20
  -1   9  -1   16.70    3.70
  -1   9  -1   16.30    7.50
   9  -1   1   11.50   12.30
  -1  -9   1   17.60    4.70
  -9  -1  -1   18.40    7.30
  -9   1   1   17.10    7.10
  -9   1   1   25.20    6.70
   1   9   1   18.50    3.20
  -1   9  -1   17.40    5.30
   1   9   1   15.70    2.90
   9   2   1   23.20    8.40
   9   2   1   31.90    8.10
  -9  -2   1   42.30    9.40
  -2   9   1   33.40    4.30
  -9   2  -1   34.20    8.30
  -9  -2   1   32.20    7.90
   9  -2  -1   26.30    9.20
   9  -2  -1   49.30    8.40
   2  -9   1   32.50    7.00
  -2   9   1   33.80    7.20
  -2  -9  -1   24.40    7.70
  -9   2  -1   37.80    8.30
  -2   9   1   43.70    9.10
  -2  -9  -1   30.00    6.10
  -2   9   1   35.80    4.50
   2   9  -1   37.10    7.10
  -2   9  -1   33.20    3.30
  -2  -9   1   27.10    7.80
   9   2  -1   30.20    8.60
  -2   9  -1   31.60    3.20
  -9  -2  -1   19.40    7.30
  -2   9  -1   21.20    7.60
   2   9   1   27.00    6.90
  -9  -2  -1   36.70    8.00
  -9   2   1   37.20    8.50
   9  -2   1   33.40    7.30
  -9   2   1   38.30    7.20
   9   2  -1   34.20    8.30
   9  -2   1   32.50    9.80
  -2   9  -1   35.70    7.40
  -2  -9   1   36.20    6.40
   2  -9  -1   40.30    7.60
  -9   3  -1  190.68   14.00
  -9  -3   1  181.28   16.10
  -3   9   1  176.28    9.10
  -3   9   1  166.38    9.00
   9   3   1  202.98   17.80
  -3  -9  -1  179.38   13.90
  -9  -3   1  210.68   15.30
  -3  -9  -1  187.08   16.00
  -3   9   1  190.38   15.80
  -9   3  -1  198.58   16.90
   3   9  -1  188.28   15.20
   9  -3  -1  185.38   18.60
  -3   9   1  195.58   17.00
   9  -3  -1  210.68   14.60
   9   3   1  169.68   15.20
   3  -9   1  201.88   15.40
  -9  -3  -1  206.88   15.00
  -9   3   1  165.08   13.70
  -9   3   1  190.98   16.30
  -3  -9   1  178.38   15.70
  -3   9  -1  203.28   17.00
   9   3  -1  204.38   18.20
   3  -9  -1  177.58   15.20
   3   9   1  182.88   15.30
  -3   9  -1  186.38   15.70
   9  -3   1  191.98   14.20
  -3  -9   1  179.38   13.90
  -9  -3  -1  197.58   16.60
   9  -3   1  196.98   18.70
   9   3  -1  176.98   15.40
   4  -9   1   46.90    9.50
   4   9  -1   43.70    8.90
  -4   9   1   49.00    9.80
  -9  -4   1   37.70    9.00
   9   4   1   47.60   10.30
  -4  -9  -1   43.30    9.10
  -9   4  -1   44.70   10.00
   9   4   1   50.49    8.50
   9  -4  -1   39.30    7.10
  -4   9   1   40.50    9.20
  -9  -4   1   57.29    8.10
   9  -4  -1   32.20   10.60
  -9   4  -1   40.70    6.80
  -9  -4  -1   42.50    9.40
  -9   4   1   48.40    7.50
  -4   9  -1   50.59    9.50
   4   9   1   56.59   10.50
   9   4  -1   39.40    8.20
  -4   9  -1   52.19    9.80
   9  -4   1   53.09    7.50
  -9  -4  -1   59.69    8.00
  -4  -9   1   39.30    8.80
   9   4  -1   63.39   11.10
   9  -4   1   45.30   10.90
  -9   4   1   35.40    8.80
   4  -9  -1   44.80    9.30
  -9   5  -1    6.20    4.40
  -9  -5   1   11.30    8.00
  -9  -5   1    4.60    4.40
   9   5   1    9.00    8.30
   5  -9   1    6.40    7.00
  -9   5  -1   13.50    8.50
   9  -5  -1   11.80    5.30
   9  -5  -1    4.00    8.90
   5   9  -1    4.10    7.00
  -5   9   1    0.20    7.40
  -5  -9  -1    6.80    7.10
   9   5   1    6.80    5.50
  -9   5   1    4.30    4.50
   9  -5   1    4.70    4.40
  -9  -5  -1    1.40    6.90
   9   5  -1   13.30    8.40
   5   9   1    4.60    7.60
   9  -5   1   -6.50    8.20
   5  -9  -1    9.60    7.60
  -9  -5  -1    9.70    4.80
  -5   9  -1   10.70    7.80
   9   5  -1    6.50    5.50
  -9   5   1    7.20    7.80
  -5  -9   1    0.90    6.90
   6   9  -1   21.80    9.20
  -9   6  -1   17.30    4.80
  -6   9   1    7.70    8.40
  -9   6  -1   20.30    9.60
  -9  -6   1   19.50    4.50
   9   6   1   22.90   10.00
   9  -6  -1   23.00    5.50
  -9  -6   1   27.80    9.30
  -6  -9  -1   26.90    9.40
   9   6   1   26.70    5.80
   9  -6  -1   24.10   10.40
   6  -9   1   15.50    8.80
   6  -9  -1   18.40    9.10
  -6   9  -1   31.10   10.40
   6   9   1    9.70    8.30
  -9   6   1   23.40    9.40
  -9  -6  -1   23.00    9.10
   9   6  -1   26.80   10.60
  -9   6   1   22.00    5.20
  -6  -9   1    8.40    8.30
   9  -6   1   20.50    9.90
  -9  -7   1  144.89   17.00
  -9   7  -1  140.59   18.50
  -9   7  -1  150.28    9.10
   7  -9   1  130.89   16.90
   9  -7  -1  159.28   10.30
   9  -7  -1  137.09   19.10
   9   7   1  117.49   18.00
  -7  -9  -1  132.69   16.90
   7   9  -1  156.88   18.30
  -7   9   1  130.39   17.40
   7   9   1  162.98   18.50
   9   7  -1  157.48   19.90
   7  -9  -1  131.99   16.90
   9  -7   1  111.79   17.00
  -9   7   1  150.98   16.60
  -9  -7  -1  125.69   15.40
  -7  -9   1  128.39   15.30
   9  -7   1  182.58    9.00
   8  -9   1  273.17   24.70
  -9   8  -1  271.97   23.70
  -8  -9  -1  253.47   22.50
  -8   9   1  263.17   23.40
  -9  -8   1  262.17   22.50
   9  -8  -1  237.08   24.50
   9   8   1  270.87   24.90
   8   9  -1  305.77   25.30
  -9  -8  -1  224.48   21.80
  -8  -9   1  278.87   22.80
   9  -8   1  280.47   25.70
   8   9   1  300.47   24.80
  -8   9  -1  255.97   23.10
   8  -9  -1  243.38   24.00
   9   8  -1  291.97   25.40
  -9   8   1  307.77   24.10
   0  10   1   35.50    6.30
   0  10   1   40.70    5.80
   0  10  -1   36.20    6.20
   0  10   1   42.10    9.90
   0  10   1   44.20    6.90
   0  10   1   40.70    6.10
   0  10  -1   40.60    5.80
 -10   0   1   37.50    9.10
 -10   0  -1   47.80    9.70
  10   0  -1   31.50    9.20
   0  10  -1   36.30    6.00
  10   0  -1   30.90    9.70
   0  10  -1   50.69   10.80
  10   0   1   39.60   10.50
  10   0   1   44.50    9.50
   1 -10   1   33.70    6.40
  -1  10   1   29.60    5.20
  10   1   1   30.80    9.10
  10  -1  -1   28.10    8.40
  -1  10   1   38.30    7.00
  10   1   1   15.60    7.90
  -1  10   1   31.80    5.50
 -10  -1   1   33.40    8.90
   1  10  -1   37.70    9.50
  10  -1  -1   32.70   10.20
  -1  10   1   35.40   10.20
 -10   1  -1   32.60    8.80
  -1 -10  -1   38.50    6.40
   1  10  -1   47.00    7.40
  -1  10  -1   29.70    9.50
 -10   1   1   35.90    8.60
  -1 -10   1   25.20    5.50
  -1  10  -1   32.40    4.80
  -1  10  -1   34.00    4.80
  10   1  -1   41.10    9.50
  10  -1   1   21.80    9.60
  -1  10  -1   36.60    6.60
   1  10   1   40.00    7.20
   1 -10  -1   33.20    6.50
 -10  -1  -1   30.50    8.70
  10   1  -1   24.30    8.70
  10  -1   1   27.20    8.10
   1  10   1   34.20    9.80
   2  10  -1  110.99   11.60
  10   2   1   92.99   12.90
  -2  10   1   98.19    7.30
  -2  10   1  118.79   12.10
 -10   2  -1   99.89   12.80
  -2  10   1  116.99   13.80
  10  -2  -1   86.39   11.30
 -10  -2   1  100.09   12.90
  -2 -10  -1  109.19   10.50
  10  -2  -1  105.89   15.30
  10   2   1  137.29   15.70
   2 -10   1  113.19   11.70
  -2  10   1   99.69    7.40
  -2 -10   1  100.89   10.20
  10   2  -1  121.69   15.20
   2  10   1  100.89   11.40
  -2  10  -1   98.59   13.00
  10  -2   1  109.39   12.30
  10  -2   1   96.89   15.00
 -10  -2  -1  102.79   13.30
   2 -10  -1  102.69   11.10
 -10   2   1   91.59   12.30
  10   2  -1   99.09   13.10
  -2  10  -1  107.39   11.70
  10   3   1  423.86   27.50
 -10  -3   1  347.37   24.80
 -10   3  -1  397.06   25.80
 -10  -3   1  414.26   24.20
   3 -10   1  372.16   23.70
  -3  10   1  412.36   24.80
  -3  10   1  359.56   25.70
  10  -3  -1  377.36   23.10
  10   3   1  335.37   24.20
   3  10  -1  378.16   23.80
  10  -3  -1  325.47   27.10
  -3 -10  -1  388.26   25.20
 -10   3  -1  361.36   22.60
  -3  10  -1  372.36   25.80
  -3 -10   1  373.56   25.00
 -10   3   1  371.56   25.60
  -3 -10   1  391.16   22.50
  10  -3   1  410.06   23.30
 -10  -3  -1  408.16   25.90
  10   3  -1  352.86   24.50
   3  10   1  394.86   24.40
  -3  10  -1  402.96   24.70
 -10   3   1  368.96   22.80
 -10  -3  -1  414.66   24.10
  10   3  -1  390.66   27.20
   3 -10  -1  389.26   24.10
  10  -3   1  362.16   27.80
 -10  -4   1   31.90    9.60
  -4 -10  -1   31.90    9.20
   4  10  -1   32.20    8.80
 -10   4  -1   39.70    7.30
  -4  10   1   41.30   10.80
 -10   4  -1   23.40    9.60
  10   4   1   31.20    8.30
  10   4   1   35.50   10.50
  10  -4  -1   28.20    7.10
  10  -4  -1   28.80   10.90
  10   4  -1   33.60   11.30
 -10  -4  -1   31.70   11.30
  10  -4   1   32.60    7.20
   4  10   1   27.80    9.00
  -4 -10   1   35.60    9.50
   4 -10  -1   44.90   11.30
  -4  10  -1   37.00   10.10
  10   4  -1   23.20    7.90
  10  -4   1   28.40   11.10
 -10  -4  -1   44.20   10.50
 -10   4   1   29.60    9.30
 -10   4   1   33.90    7.20
  10  -5  -1  500.25   26.20
 -10  -5   1  465.95   30.00
 -10   5  -1  504.45   31.00
  -5 -10  -1  481.25   29.80
  10   5   1  481.05   27.30
  -5  10   1  497.15   31.40
 -10   5  -1  449.66   25.50
   5  10  -1  512.75   30.60
 -10  -5   1  501.85   25.90
  10   5   1  516.95   32.60
   5 -10   1  500.95   30.40
  10  -5  -1  443.26   32.90
 -10  -5  -1  488.75   25.90
  10   5  -1  467.25   27.10
 -10   5   1  454.45   30.20
  -5  10  -1  484.55   31.30
   5 -10  -1  449.46   29.80
 -10   5   1  436.06   26.20
 -10  -5  -1  453.65   29.90
  10  -5   1  444.16   32.80
  10   5  -1  502.75   32.70
  -5 -10   1  421.46   29.00
  10  -5   1  475.25   25.60
   5  10   1  462.25   30.00
 -10  -6   1  104.39    9.00
 -10   6  -1   89.19    9.10
  -6  10   1   98.49   14.80
  -6 -10  -1   80.39   12.70
  10  -6  -1   90.99    9.50
  10   6   1   92.69   14.90
 -10   6  -1  109.29   14.80
  10  -6  -1   89.49   15.50
  10   6   1  105.89   10.80
   6 -10   1   71.99   13.20
 -10  -6   1   86.89   20.80
   6  10  -1   86.09   14.10
   6 -10  -1   77.59   13.20
  -6  10  -1   70.09   13.30
  -6 -10   1   79.29   12.80
  10  -6   1   97.49    9.60
 -10   6   1   94.19    9.50
 -10   6   1  101.99   16.20
  10   6  -1   84.69   14.80
 -10  -6  -1  100.59   14.90
 -10  -6  -1  110.19    9.10
  10   6  -1   87.19    9.50
  10  -6   1  109.79   16.80
   6  10   1   93.49   14.10
  -7 -10  -1   45.30   11.10
  10  -7  -1   46.00    7.70
  10  -7  -1   52.59   14.40
   7 -10   1   35.80   10.90
   7  10  -1   33.80   13.00
 -10  -7   1   33.00   11.10
 -10   7  -1   49.90   12.80
  10   7   1   44.10   12.90
  -7  10   1   52.59   13.20
 -10  -7  -1   39.20   11.20
  10  -7   1   52.59    5.50
 -10   7   1   36.60   11.50
  10  -7   1   33.50   13.20
  -7  10  -1   44.60   12.50
  -7 -10   1   35.90   11.20
  10   7  -1   49.99   14.00
   7  10   1   42.10   12.20
   7 -10  -1   43.00   12.40
   0  11   1   12.30    5.10
  11   0   1   18.70   10.00
  11   0   1   19.60    8.50
   0  11   1    6.40    4.10
   0  11  -1    9.90    4.80
 -11   0  -1    7.80    8.00
   0  11   1   11.60    5.40
   0  11  -1    5.40    8.10
   0  11  -1    7.90    3.90
   0  11   1    8.20    8.10
  11   0  -1    7.60    8.80
   0  11  -1    8.60    4.10
 -11   0   1   10.40    8.30
   0  11  -1   12.00    5.10
  11   0  -1    7.40    8.70
   0  11   1   11.90    4.30
   1  11  -1   40.40   10.70
  -1  11   1   36.20    5.50
  -1  11   1   34.80    6.80
  11   1   1   19.50    9.20
 -11   1  -1   38.80   10.50
   1  11  -1   23.50    6.80
   1 -11   1   44.10    7.30
  -1  11   1   27.40   10.00
  11  -1  -1   46.90   12.40
  11   1   1   42.80   10.60
  11  -1  -1   27.30    9.30
 -11  -1   1   38.60   10.30
 -11   1   1   35.20    9.60
  -1  11  -1   39.80   10.80
  -1  11  -1   41.30    5.20
  11   1  -1   62.99   12.50
   1  11   1   37.20    7.20
  -1  11  -1   44.30    7.20
  11  -1   1   33.50    9.70
  11   1  -1   34.80   10.40
  -1  11  -1   36.70    4.80
   1  11   1   45.70    8.20
 -11  -1  -1   37.70    9.80
  11  -1   1   37.70   11.50
   1  11   1   30.10   10.10
  11   2   1   90.89   14.20
   2  11  -1   87.59   13.50
  -2  11   1   85.79   13.90
   2  11  -1   84.39   10.90
  -2  11   1   85.69    6.20
  -2 -11  -1   97.09   10.20
   2 -11   1   92.49   10.90
  11  -2  -1   92.49   15.20
 -11  -2   1   81.39   12.50
  -2  11   1   84.89    6.40
  11  -2  -1   84.99   11.70
 -11   2  -1   80.39   12.90
  -2  11   1  105.59   11.90
  11   2   1   74.59   12.90
   2  11   1   94.89   11.60
  11   2  -1   85.09   13.30
   2 -11  -1   97.99   11.00
  11  -2   1   74.39   14.20
  -2 -11   1   99.19   10.00
  -2  11  -1  103.19   11.70
   2  11   1   79.39   13.10
 -11  -2  -1   75.09   12.10
  -2  11  -1  113.09   15.00
 -11   2   1   81.09   12.50
  11   2  -1   84.69   13.70
  11  -2   1   83.79   11.90
  11   3   1   13.40   10.20
  11   3   1    8.10    7.70
  11  -3  -1    6.50    7.00
 -11  -3   1    6.80    8.70
   3 -11   1    7.00    7.10
  11  -3  -1    4.70    9.80
  -3  11   1    7.50    7.40
   3  11  -1    9.40    7.40
 -11   3  -1   12.80    8.70
 -11  -3  -1   -7.50    7.70
   3 -11  -1    8.50    6.70
   3  11   1    0.00    6.80
 -11   3   1    2.00    8.10
  11   3  -1   -3.50    9.60
  11  -3   1   12.00    6.90
  11  -3   1   -1.40    9.80
  -3  11  -1    4.80    6.50
  11   3  -1    2.90    7.30
  11   4   1    9.00   10.70
 -11   4  -1    3.50    9.20
  -4 -11  -1   30.50   10.00
  11  -4  -1   13.50   10.70
   4 -11   1   15.40    8.20
   4  11  -1   10.40    8.30
  11  -4  -1   18.40    8.40
  11   4   1   15.10    8.10
  -4  11   1   16.90   10.50
  -4  11  -1   11.00    9.40
   4 -11  -1   19.20    8.20
  11   4  -1   19.70   10.40
 -11  -4  -1   16.80    9.50
  -4 -11   1   24.10    9.60
  11  -4   1   23.00   11.60
 -11   4   1   -0.30    9.80
  11  -4   1   21.50    7.10
  11   4  -1   16.10    8.40
   4  11   1   10.70    8.10
   5  11  -1  322.07   24.30
  11  -5  -1  315.77   20.00
  11   5   1  349.07   27.50
 -11   5  -1  332.87   25.50
 -11  -5   1  319.57   24.90
  -5  11   1  332.97   26.40
   5 -11   1  279.67   23.20
  11   5   1  283.97   21.30
  -5 -11  -1  278.17   23.70
  11  -5  -1  276.27   27.10
   5 -11  -1  326.67   24.10
  11   5  -1  299.57   21.30
   5  11   1  307.97   24.10
  11  -5   1  282.67   27.20
 -11  -5  -1  283.27   24.20
  -5  11  -1  319.47   25.90
 -11   5   1  329.97   25.40
  11  -5   1  322.57   19.70
  11   5  -1  306.67   26.70
  -5 -11   1  307.07   24.20
   0  12   1   15.90    5.90
   0  12  -1   32.40   10.90
   0  12   1   27.00   10.80
 -12   0  -1   25.60   10.30
   0  12   1   19.00    3.90
  12   0  -1   21.70   10.30
  12   0  -1   27.30   11.70
   0  12  -1   18.80    5.50
   0  12  -1   24.00    4.50
  12   0   1   16.10   10.70
 -12   0   1    8.60    9.40
  12   0   1   10.80    9.30
   1  12  -1   46.60    8.00
 -12   1  -1   40.30   11.50
 -12  -1   1   35.80   10.90
   1  12  -1   19.70   10.40
  12   1   1   69.99   20.60
  -1  12   1   40.20    7.00
  12  -1  -1   42.90   21.10
  12   1   1   28.30   10.80
  12  -1  -1   58.19   11.70
  -1  12   1   40.60   11.80
  12  -1   1   43.90   10.70
 -12  -1  -1   27.80   10.30
  12   1  -1   48.40   12.20
   1  12   1   47.80   11.60
  12  -1   1   42.40   14.90
  -1  12  -1   43.20    5.60
 -12   1   1   40.40   10.90
  -1  12  -1   45.20   12.00
   1  12   1   47.90    8.60
 -12  -2   1   28.60   10.30
  12  -2  -1   21.10   11.30
   2  12  -1   32.20   11.60
   2  12  -1   28.80    7.70
   2 -12   1   27.60    7.00
  12  -2  -1   19.20    8.90
  -2  12   1   25.00   10.50
  12   2   1   20.40   10.00
 -12   2  -1   18.90   10.40
  12   2   1   21.80   10.40
  12   2  -1   18.10   10.00
 -12  -2  -1   25.00   10.50
   2  12   1   23.00    8.00
 -12   2   1   28.10   10.30
  -2  12  -1   25.00   10.70
  12  -2   1   36.10    9.90
  12   2  -1   15.90   11.30
  12  -2   1   24.50   12.00
   2  12   1   38.80   12.20
   2 -12  -1   23.90    7.20
   0   0   2   -0.30    0.10
   0   1   2  637.24   32.20
  -1   0   2  614.64   30.90
   1   0  -2  664.43   33.60
   0   1   2  638.04   31.10
  -1   0  -2  627.44   31.80
   0   1   2  564.34   31.80
   0   1  -2  669.23   31.90
   0   1  -2  595.94   30.90
  -1   0  -2  659.63   32.40
  -1   0   2  630.14   33.30
   0   1  -2  672.43   31.20
   0  -1  -2  647.94   31.10
   1   0  -2  644.24   30.50
   1   0   2  675.73   32.30
   1   0   2  577.04   31.80
   0  -1   2  627.54   30.50
  -1   1   2 2000.40   93.29
  -1  -1  -2 2046.90   95.39
   1  -1   2 2028.20   89.89
  -1  -1   2 1911.91   94.49
   1  -1   2 2185.38   93.99
  -1   1  -2 2048.79   93.79
   1  -1  -2 2056.99   93.29
   1   1   2 2127.89   95.79
   1   1  -2 2080.69   92.19
  -1  -1  -2 2000.70   93.09
  -1   1  -2 2033.60   89.89
   1  -1  -2 1964.50   92.69
  -1  -1   2 2025.60   92.19
   1   1   2 2105.89   93.49
  -1   1   2 2014.50   92.79
   1   1  -2 2060.39   95.29
   0  -2  -2 1045.80   51.69
   2   0   2 1044.30   52.99
   0   2   2 1023.00   51.49
   0  -2  -2 1048.50   51.59
  -2   0  -2  989.60   52.39
   2   0  -2 1069.59   54.19
  -2   0   2  991.60   51.19
   2   0   2 1108.29   53.39
   0   2   2 1034.00   51.79
   0  -2   2 1059.59   51.89
   2   0  -2  973.80   50.89
   0   2  -2 1080.99   51.89
   0   2  -2 1010.90   49.00
  -2   0   2  943.81   53.29
   0  -2   2 1021.60   48.70
  -2   0  -2  983.00   52.29
  -1  -2  -2  543.45   24.90
   2  -1  -2  539.05   25.60
  -1   2   2  538.45   25.80
   1  -2   2  541.25   25.70
   2   1   2  548.25   26.00
  -2   1  -2  538.55   25.80
   1   2  -2  539.55   25.60
   1  -2   2  564.34   26.00
  -1   2   2  557.54   25.30
  -2  -1   2  558.44   26.00
   1   2  -2  578.44   25.70
  -2  -1   2  572.74   25.60
   2  -1  -2  557.94   26.40
  -2   1  -2  566.04   26.40
   1   2  -2  528.65   24.70
  -1  -2  -2  579.14   25.90
   2   1   2  545.55   25.80
  -2  -1   2  541.95   25.60
   2   1   2  551.04   25.70
  -1   2   2  575.14   26.10
   1   2   2  575.04   25.80
  -1  -2   2  560.64   24.70
  -2  -1  -2  568.14   25.70
   2  -1   2  574.94   25.90
  -2   1   2  604.24   26.60
   1  -2  -2  593.44   26.20
   2   1  -2  587.64   25.70
  -1   2  -2  594.64   26.00
   2   1  -2  568.94   26.10
   2   1  -2  585.74   25.60
   1   2   2  594.74   26.00
  -2  -1  -2  600.74   26.10
  -1  -2   2  581.44   25.60
  -1   2  -2  600.54   26.20
  -2  -1  -2  565.14   25.80
  -1  -2   2  580.34   25.70
   2  -1   2  578.14   26.50
  -2   1   2  567.44   25.70
   2   2   2 5299.57  251.67
   2  -2   2 5457.05  240.78
  -2  -2  -2 5571.44  248.48
  -2   2   2 5874.91  249.28
   2   2  -2 5359.06  251.47
   2  -2  -2 5520.55  245.58
  -2   2   2 5583.64  246.18
   2   2  -2 5619.14  247.38
  -2   2  -2 5531.95  249.58
  -2  -2   2 5026.20  249.68
   2  -2   2 5827.02  249.68
  -2  -2  -2 5937.81  252.57
  -2  -2   2 5426.66  247.18
   2  -2  -2 5483.85  248.28
   2   2   2 5687.83  248.48
  -2   2  -2 5487.45  240.88
  -3   0   2 1832.32  100.49
   0   3  -2 2012.40   94.79
  -3   0  -2 1997.40  100.19
   3   0  -2 1982.20   98.59
  -3   0   2 2144.69   99.69
   0  -3   2 2086.09   94.69
  -3   0  -2 2105.59  100.59
   0   3   2 2017.20   97.89
   0  -3  -2 2116.99   99.49
   3   0   2 1897.61   99.89
   0  -3   2 2073.29   99.39
   0   3  -2 2069.39   99.09
   0  -3  -2 2028.60   97.29
   3   0  -2 2054.59  101.99
   3   0   2 2142.49  101.19
   0   3   2 2107.09   99.59
  -3  -1   2 1177.18   53.99
   1   3  -2 1214.88   53.99
   3   1  -2 1254.77   54.29
   2  -3   2  347.57   17.60
  -3  -2   2  318.37   16.70
   3  -2  -2  344.77   18.00
   2  -3   2  329.17   17.00
   3   2   2  339.97   17.50
  -2   3   2  348.17   17.60
  -3   2  -2  331.77   15.80
   2   3  -2  336.27   17.10
  -3  -2   2  346.17   17.30
  -2  -3  -2  340.27   15.20
   3  -2  -2  336.67   16.90
  -2  -3  -2  322.17   16.80
  -3   2  -2  309.57   16.90
   2   3  -2  357.86   16.90
  -2   3   2  335.47   15.90
  -3   2  -2  344.77   18.00
   3   2   2  347.87   16.40
  -2  -3  -2  342.27   17.20
  -2   3   2  345.87   17.20
  -3  -2   2  327.17   16.10
   3   2   2  334.17   16.90
   3  -2  -2  336.17   16.30
   2   3   2  333.77   17.20
  -3  -2  -2  333.37   16.90
  -3   2   2  328.87   16.30
   2  -3  -2  346.57   17.60
  -3  -2  -2  345.77   17.40
  -2  -3   2  341.37   16.90
   2  -3  -2  333.67   15.80
  -2  -3   2  342.57   14.80
  -3   2   2  347.67   17.90
   3   2  -2  342.77   17.40
   3   2  -2  346.27   16.70
  -2  -3   2  337.37   16.80
   2   3   2  338.87   15.40
  -3  -2  -2  329.87   16.20
   3  -2   2  334.97   15.70
   2   3   2  348.77   17.00
   3   2  -2  345.77   16.30
  -2   3  -2  350.16   17.70
   3  -2   2  347.17   18.00
  -2   3  -2  337.17   17.20
   3  -2   2  329.47   17.10
  -3   2   2  342.37   17.00
   2  -3  -2  329.07   16.80
  -2  -3   2  336.17   14.80
  -3   3  -2  683.53   29.90
  -3  -3  -2  682.13   30.30
  -3   3  -2  719.03   34.60
  -3  -3  -2  699.93   33.70
   3   3   2  685.93   32.50
   3   3   2  683.63   30.50
   3   3  -2  689.63   32.40
  -3   3  -2  653.83   32.10
  -3  -3  -2  680.43   31.90
   3  -3  -2  650.93   32.80
   3  -3   2  656.53   32.00
  -3  -3   2  650.73   31.70
  -3  -3   2  741.83   33.60
   3   3   2  696.83   32.00
   3   3  -2  684.03   31.70
   3  -3   2  637.14   32.70
   3  -3   2  679.73   29.90
  -3  -3   2  702.13   30.10
   3  -3  -2  668.23   32.90
   3  -3  -2  693.13   30.70
   3   3  -2  665.83   30.20
  -3   3   2  672.63   32.00
  -3   3   2  636.34   30.70
  -4   0  -2  364.66   18.40
  -4   0  -2  375.26   19.10
   4   0   2  341.67   19.00
  -4   0   2  349.47   18.40
  -4   0   2  359.56   18.50
   0  -4  -2  361.16   17.60
   0  -4  -2  366.56   18.50
   0   4   2  347.57   18.40
   0  -4   2  377.76   17.40
   4   0  -2  363.26   18.60
  -4   0  -2  356.76   18.60
   4   0   2  389.26   18.70
   4   0  -2  368.26   18.40
   4   0  -2  372.96   19.20
   0   4  -2  361.16   17.60
   0   4   2  368.66   17.70
   0   4   2  364.96   17.90
   0   4  -2  381.06   18.60
   0  -4   2  376.06   17.20
   4   0   2  363.76   18.70
   0  -4  -2  365.36   17.60
   0   4  -2  364.46   17.20
  -4   0   2  389.36   19.20
   4   1   2 1288.97   60.59
  -1   4   2 1384.66   61.99
  -4  -1   2 1349.16   62.09
  -4   1  -2 1423.96   63.09
   1  -4   2 1337.37   58.39
   1   4  -2 1330.77   58.49
  -4  -1   2 1392.96   60.59
  -4  -1   2 1287.27   60.29
   1   4  -2 1338.77   60.39
  -1   4   2 1380.46   60.49
   4  -1  -2 1314.57   60.39
  -4   1  -2 1324.27   60.69
   4   1  -2 1371.26   60.39
  -4   1   2 1449.95   61.89
   1  -4  -2 1374.66   60.49
  -4  -1  -2 1304.77   60.69
  -4  -1  -2 1398.36   60.69
   4   1  -2 1312.97   60.59
   1   4   2 1299.47   58.79
  -1  -4   2 1309.57   60.39
  -4   1   2 1374.36   60.29
   1   4   2 1365.96   58.89
   4  -1   2 1296.67   61.39
  -1  -4   2 1371.76   58.49
  -2   4   2   66.29    6.80
   4  -2  -2   80.09    8.40
  -4   2  -2   88.69    7.80
  -2   4   2   75.19    6.80
  -4   2  -2   77.69    5.50
  -2  -4  -2   80.09    6.70
   2   4  -2   71.79    6.50
   4   2   2   84.89    6.60
  -4   2  -2   79.59    7.40
  -4  -2   2   67.19    6.70
  -4  -2   2   74.39    6.40
  -2  -4  -2   76.49    7.10
  -2   4   2   73.39    5.10
  -2   4   2   74.69    5.00
   4  -2  -2   68.49    6.30
   2  -4   2   81.59    6.60
   2   4  -2   79.89    6.50
   4   2   2   71.79    6.00
   2  -4   2   82.09    6.90
  -4  -2   2   75.89    5.80
   4   2   2   79.49    7.30
   4  -2  -2   66.69    5.80
  -2  -4   2   76.69    6.40
   2  -4  -2   77.39    6.50
   4   2  -2   59.79    7.20
   4   2  -2   87.49    6.30
   4  -2   2   74.09    5.50
  -2  -4   2   73.39    6.20
   4  -2   2  102.09   10.60
  -4   2   2   77.09    5.90
   2   4   2   77.69    4.10
  -4   2   2   93.89    7.90
   2   4   2   74.79    4.10
  -2   4  -2   84.89    7.10
   2  -4  -2   73.29    7.00
   2   4   2   83.19    6.90
  -4  -2  -2   77.99    6.80
  -4  -2  -2   85.69    6.90
  -4  -2  -2   86.49    6.20
   4  -2   2   77.69    6.70
   4   2  -2   75.39    7.00
  -2   4  -2   78.39    6.90
  -4   2   2   75.39    6.60
   2   4   2   82.59    6.70
  -4  -3   2  180.68   11.50
  -3   4   2  184.38   12.30
  -3  -4  -2  179.18   11.60
  -4  -3   2  171.28   11.00
   4  -3  -2  173.78   12.40
   3   4  -2  184.58   11.20
  -4   3  -2  176.18   12.40
  -3  -4  -2  176.28    8.60
  -3  -4  -2  153.18   10.90
  -4   3  -2  158.98   11.30
   4  -3  -2  165.78   11.10
   3  -4   2  173.88   11.20
  -3   4   2  170.48   11.40
  -4  -3   2  171.78    9.70
   4   3   2  173.98   11.90
   4  -3  -2  175.78   10.10
   4   3   2  179.58   11.20
  -3   4   2  169.38    9.50
   4   3   2  177.18   10.10
  -4   3  -2  173.58    9.40
   3  -4  -2  174.88   11.20
   4   3  -2  191.88   12.10
  -4   3   2  185.78   11.50
  -3  -4   2  186.08   11.30
  -3  -4   2  188.78   11.20
   4   3  -2  183.18   10.00
  -4   3   2  203.98   12.80
  -4  -3  -2  188.78   10.00
   4  -3   2  188.78    9.50
  -4  -3  -2  198.48   11.60
  -4   3   2  180.98   10.10
   3  -4  -2  192.38    9.60
   3   4   2  184.28    8.80
   4  -3   2  188.38   11.50
  -3   4  -2  193.38   12.40
   4   3  -2  190.78   11.10
   3   4   2  197.68   11.40
  -4  -3  -2  182.88   11.70
   3   4   2  181.08   11.80
  -3   4  -2  214.28   12.10
   4  -3   2  181.38   12.50
  -4   4   2   25.00    3.40
   4  -4   2   40.70    5.90
  -4  -4  -2   30.30    5.30
   4   4   2   17.00    4.70
  -4  -4   2   28.30    4.80
   4  -4  -2   32.90    5.20
   4  -4   2   28.10    2.80
  -4  -4  -2   25.60    2.90
  -4   4   2   20.30    4.60
  -4   4  -2   23.80    2.60
   4   4   2   29.00    3.30
   4  -4  -2   19.90    5.30
   4   4  -2   31.90    5.90
  -4   4  -2   29.70    5.60
  -4   4  -2   31.30    5.90
   4  -4  -2   28.10    3.60
   4   4   2   25.60    4.90
   4   4  -2   26.00    4.90
   4  -4   2   26.20    5.90
  -4  -4  -2   24.40    4.90
  -4  -4   2   31.70    3.00
  -4  -4   2   24.00    5.00
  -4   4   2   21.70    5.10
   5   0  -2  133.19   10.20
  -5   0   2  148.59   10.20
  -5   0   2  126.49    9.30
   0   5   2  133.69    8.40
   0  -5   2  124.59    7.60
   5   0   2  108.29   11.10
   5   0   2  143.99    9.70
   0  -5  -2  134.19    8.20
   0  -5  -2  122.89    8.10
  -5   0  -2  139.89   10.10
   0   5   2  131.69    9.40
   0   5  -2  126.09    9.40
   0  -5   2  122.19    7.90
   5   0  -2  138.39    9.30
  -5   0   2  121.59    9.30
  -5   0  -2  128.89    9.60
   0   5   2  135.79    8.40
   0   5  -2  143.99    9.50
   0  -5  -2  138.39    9.40
   0   5  -2  140.39    7.90
   0   5  -2  136.29    8.20
  -5   0  -2  132.49    9.30
   5   0   2  127.99    9.40
   5  -1  -2  652.73   34.00
  -1   5   2  721.13   34.70
   1   5  -2  714.63   32.10
   1   5  -2  737.63   34.50
  -1   5   2  728.53   34.80
  -5  -1   2  694.03   34.70
  -1   5   2  730.83   33.00
  -5  -1   2  708.93   34.40
   1  -5   2  726.03   32.00
  -5   1  -2  733.83   35.60
  -5  -1   2  745.83   34.70
  -1  -5  -2  680.63   34.30
   5   1   2  772.72   35.10
   1  -5   2  694.03   33.80
  -1   5   2  735.23   34.20
   5  -1  -2  715.73   34.40
  -1   5   2  737.83   33.10
  -5   1  -2  696.23   34.70
  -5   1  -2  706.33   33.90
   1   5  -2  755.72   33.80
   5   1   2  700.03   34.80
   5   1   2  711.73   34.60
  -1  -5  -2  750.02   33.90
   5  -1  -2  723.33   35.70
  -1   5  -2  763.62   34.80
  -5  -1  -2  667.13   34.50
   5   1  -2  736.43   34.40
  -1  -5   2  688.13   34.30
   1  -5  -2  722.63   34.10
   5  -1   2  732.03   34.80
  -1  -5   2  750.82   33.50
  -1   5  -2  731.83   32.10
  -1  -5   2  735.53   32.00
   5  -1   2  733.13   34.00
  -5   1   2  769.52   35.80
  -1   5  -2  732.13   34.10
   5   1  -2  727.43   34.90
   5  -1   2  687.23   35.60
  -5   1   2  703.63   34.50
   5   1  -2  747.33   35.10
   1   5   2  730.03   32.50
  -5  -1  -2  750.32   36.30
  -5  -1  -2  718.33   34.70
   1   5   2  702.03   32.30
   1   5   2  722.43   34.50
  -1   5  -2  728.73   34.80
   1   5   2  736.73   34.10
  -5   1   2  697.53   34.20
  -5   2  -2  163.88   11.40
   5  -2  -2  167.58   12.40
  -5   2  -2  180.28   12.60
  -5   2  -2  174.88   10.20
   5   2   2  167.88   11.90
   2   5  -2  174.78   11.20
  -2   5   2  167.78    9.30
   5  -2  -2  157.78   10.90
   5  -2  -2  155.98   10.40
  -5  -2   2  175.88   11.60
   5   2   2  171.58   11.00
   2   5  -2  153.38   10.80
  -2  -5  -2  174.48   11.00
   2  -5   2  165.38   11.10
  -2   5   2  177.28   11.50
  -2   5   2  178.38   11.70
  -2   5   2  156.98   11.30
  -5  -2   2  163.88   11.10
  -2   5   2  154.78    9.10
   5   2   2  184.68   11.50
  -5  -2   2  183.98   10.80
  -2  -5  -2  173.28   11.20
   5  -2   2  164.78   10.10
  -5   2   2  179.78   10.70
   5  -2   2  171.18   11.30
  -5  -2  -2  188.68   11.80
  -2   5  -2  160.68   11.50
   2   5   2  170.28   11.10
   2  -5  -2  174.18   11.50
  -2  -5   2  176.18   11.20
   5  -2   2  162.88   12.30
   5   2  -2  174.88   12.00
  -2   5  -2  175.48   11.40
  -5   2   2  180.68   12.50
   5   2  -2  168.58   11.00
  -5  -2  -2  165.48   11.40
   5   2  -2  166.58   11.00
  -5  -2  -2  176.98   10.90
  -5   2   2  178.78   11.50
   2   5   2  174.58    7.80
  -2  -5   2  171.08   10.70
  -3   5   2  363.26   18.50
   3   5  -2  388.26   20.70
   5   3   2  379.06   20.70
   3  -5   2  372.56   20.80
  -5   3  -2  374.36   19.10
  -3   5   2  404.76   21.90
  -5   3  -2  418.46   22.70
   3   5  -2  398.16   21.30
  -5   3  -2  365.96   21.10
  -5  -3   2  380.16   20.80
   5   3   2  377.26   21.80
   3  -5   2  388.36   21.50
  -3  -5  -2  368.86   20.70
  -3   5   2  377.16   21.20
  -5  -3   2  388.16   19.50
  -3   5   2  376.46   18.60
   5  -3  -2  361.66   20.60
  -3  -5  -2  362.26   20.60
  -5  -3   2  367.26   21.00
   5   3   2  378.86   19.90
   5  -3  -2  389.86   22.50
   5  -3  -2  375.16   19.60
   5  -3   2  413.26   19.20
   5  -3   2  363.96   20.80
   3  -5  -2  391.06   21.70
   3   5   2  420.06   21.60
   3   5   2  433.86   21.30
  -5   3   2  392.46   19.70
  -5   3   2  402.26   21.10
  -5  -3  -2  400.26   21.50
   5   3  -2  394.86   20.00
   5  -3   2  391.96   22.50
  -3  -5   2  401.56   20.90
   3  -5  -2  403.06   20.90
  -3  -5   2  406.06   20.70
  -5  -3  -2  386.66   21.00
   5   3  -2  434.76   20.90
  -3   5  -2  422.06   21.60
  -5   3   2  412.46   22.60
  -5  -3  -2  422.06   19.80
  -3   5  -2  454.85   22.30
   5   3  -2  428.76   22.20
   4   5  -2   29.80    5.90
  -4  -5  -2   31.30    6.20
  -5   4  -2   33.30    3.60
   5   4   2   30.80    5.20
   5   4   2   29.60    6.50
  -4   5   2   28.60    6.00
   5  -4  -2   32.10    4.20
   5   4   2   22.80    3.80
  -4  -5  -2   25.30    5.30
  -5  -4   2   32.00    6.20
  -5   4  -2   19.90    5.70
  -5   4  -2   23.30    5.50
  -5  -4   2   44.80    6.40
   4  -5   2   35.50    5.90
  -4   5   2   22.40    3.30
  -4   5   2   27.50    5.60
   5  -4  -2   29.20    6.40
   4   5  -2   32.60    5.30
  -5  -4   2   34.10    3.90
   4  -5   2   29.90    6.40
   5  -4  -2   25.30    5.10
  -5  -4  -2   24.80    3.60
  -5   4   2   32.60    7.00
   4  -5  -2   34.90    7.10
   4  -5  -2   24.40    5.00
   4   5   2   24.80    5.00
   4   5   2   23.40    2.20
   4   5   2   20.90    5.80
  -5  -4  -2   22.60    5.30
   5  -4   2   29.70    3.50
  -5   4   2   31.80    4.20
   5  -4   2   25.30    6.70
   5   4  -2   24.60    3.80
   5   4  -2   24.90    5.60
  -5  -4  -2   20.10    5.40
  -5   4   2   34.60    6.00
   5  -4   2   22.30    4.90
  -4  -5   2   25.20    5.20
  -4  -5   2   26.80    5.40
  -4   5  -2   17.70    5.10
   5   4  -2   21.60    5.00
   4  -5  -2   29.40    3.60
  -4   5  -2   36.10    7.10
   5   5   2 4660.13  207.18
  -5  -5   2 4946.60  206.38
   0  -6   2   92.59    6.40
   0   6  -2   92.39    8.70
   6   0   2   72.39    8.60
   6   0   2   91.59    8.60
   0   6  -2   93.49    8.50
   0   6   2   82.99    7.10
   0   6   2   98.19    8.60
   0  -6  -2   91.99    6.90
  -6   0  -2   89.79    8.70
   0  -6   2   89.99    6.70
   0   6  -2   87.29    6.80
   6   0  -2   86.79    8.70
  -6   0  -2   85.09    8.90
   6   0  -2   78.89    8.00
  -6   0   2   82.99    8.30
   0   6   2   90.69    6.90
   0  -6  -2   90.39    6.90
  -6   0   2   95.69    9.10
   6   0  -2  105.39   10.50
  -6   0   2   83.09    8.50
   6   0   2   85.39    8.50
  -6   0  -2   85.59    8.20
   0   6  -2   90.19    6.60
   1   6  -2  302.27   15.70
   1   6  -2  282.97   16.50
  -6  -1   2  302.37   17.10
   6   1   2  265.77   17.00
   6   1   2  321.77   17.70
  -1   6   2  312.57   16.20
  -1   6   2  296.77   17.20
   1   6  -2  280.77   13.60
  -1  -6  -2  266.17   15.40
   6   1   2  274.87   16.60
   1  -6   2  295.07   15.80
  -6  -1   2  282.87   16.70
  -6   1  -2  272.87   16.90
  -1   6   2  277.37   14.70
   6  -1  -2  269.27   17.80
   6  -1  -2  291.47   16.60
  -6   1  -2  309.17   18.10
  -1   6   2  278.27   16.70
  -1  -6  -2  251.77   16.20
   6  -1  -2  282.37   16.50
  -6   1  -2  289.87   16.10
  -1   6   2  273.67   14.80
  -6  -1   2  298.57   16.90
   1   6   2  280.37   16.60
  -1   6  -2  288.07   16.90
   6  -1   2  287.97   16.80
   6   1  -2  282.17   17.30
  -6   1   2  250.07   16.00
  -6  -1  -2  274.87   16.80
  -6  -1  -2  278.57   16.70
   1   6   2  311.37   16.20
   6   1  -2  293.77   16.60
  -1  -6   2  301.07   15.30
   6   1  -2  282.47   17.20
  -6   1   2  299.07   17.90
   1  -6  -2  288.47   16.00
  -6  -1  -2  279.97   16.80
   1   6   2  275.07   14.00
  -1  -6   2  284.47   13.60
  -1   6  -2  300.67   17.20
   6  -1   2  281.87   16.10
   1   6   2  267.57   13.90
  -1   6  -2  282.97   13.80
  -6   1   2  287.47   16.80
   6  -1   2  279.97   18.00
  -1   6  -2  290.57   16.00
  -1  -6   2  273.27   16.50
   6   2   2  381.86   20.00
  -6   2  -2  315.67   18.30
  -2   6   2  370.36   20.20
  -2   6   2  389.96   20.20
  -6   2  -2  389.66   21.50
   6  -2  -2  364.66   21.40
  -2   6   2  375.06   17.40
  -2   6   2  350.86   17.20
  -2  -6  -2  352.86   19.60
  -2  -6  -2  367.16   19.20
  -6  -2   2  399.46   19.60
   6  -2  -2  362.16   19.00
   2   6  -2  372.46   19.40
  -6  -2   2  339.47   19.80
   2  -6   2  389.26   21.50
   6  -2  -2  359.36   19.60
   6   2   2  375.36   20.80
  -6   2  -2  374.06   20.30
   2   6  -2  363.76   19.60
  -2   6   2  375.26   19.90
  -6  -2   2  375.56   19.90
   6   2  -2  345.77   20.50
  -2  -6   2  320.17   19.30
  -6  -2  -2  362.76   19.40
  -2   6  -2  339.97   19.90
   2   6   2  367.86   19.60
  -2   6  -2  325.87   15.50
  -6  -2  -2  336.57   19.70
   6  -2   2  345.57   18.50
  -6   2   2  330.77   19.60
  -2   6  -2  323.47   19.50
   2   6   2  345.17   19.60
   6  -2   2  308.47   20.70
   6  -2   2  338.17   19.70
   2  -6  -2  333.97   19.50
  -6   2   2  363.66   21.20
  -6   2   2  339.07   18.80
  -2   6  -2  311.97   15.40
   6   2  -2  354.86   19.80
  -2  -6   2  337.07   18.60
   6   2  -2  350.76   19.40
  -6  -2  -2  336.37   19.80
  -2   6  -2  323.37   19.40
   6  -3  -2  359.96   19.00
   3   6  -2  381.56   20.30
  -3   6   2  343.97   17.20
   3  -6   2  330.07   20.30
  -3  -6  -2  326.37   19.80
  -6  -3   2  343.97   20.40
  -3  -6  -2  353.36   19.90
  -3   6   2  360.06   20.80
  -3   6   2  345.77   20.30
   6  -3  -2  330.27   21.70
  -6   3  -2  389.46   22.30
  -6   3  -2  366.96   18.50
   6  -3  -2  328.07   19.80
  -6   3  -2  327.77   20.30
  -3   6   2  347.17   17.30
  -6  -3   2  358.16   19.00
   6   3   2  351.86   20.20
  -6  -3   2  340.67   20.10
   6   3   2  373.86   21.50
   6   3   2  351.66   19.40
  -3   6   2  360.96   20.90
   3   6  -2  331.97   20.10
   6  -3   2  353.06   18.40
   3   6   2  351.46   20.50
   6   3  -2  377.86   21.50
  -3  -6   2  354.86   20.10
  -6   3   2  426.86   22.60
   6  -3   2  366.96   20.60
  -6  -3  -2  385.46   19.70
  -6  -3  -2  359.36   20.60
  -6  -3  -2  379.26   20.60
  -3  -6   2  346.67   19.50
  -6   3   2  354.06   18.90
  -3   6  -2  345.57   20.50
  -3   6  -2  376.26   21.00
   6   3  -2  365.86   20.00
   6  -3   2  378.16   22.30
   3   6   2  403.26   20.60
   3  -6  -2  355.46   20.80
   6   3  -2  374.06   19.60
  -6   3   2  366.06   20.60
  -4   6   2  148.29   12.30
   4   6  -2  150.88   11.50
  -6   4  -2  135.79   11.90
   6  -4  -2  134.89   11.30
  -6   4  -2  134.39    8.90
   4  -6   2  134.49   12.40
  -6  -4   2  129.19   11.40
   6   4   2  148.69   10.10
  -6  -4   2  151.98    9.40
  -4   6   2  133.49    8.30
  -4  -6  -2  142.09   11.70
  -4   6   2  148.69    8.20
  -4   6   2  164.98   13.10
   6  -4  -2  151.38    9.80
  -4  -6  -2  145.49   11.70
   6  -4  -2  139.49   13.30
   4   6  -2  165.48   12.50
   6   4   2  151.18   13.00
   6  -4   2  130.79   13.10
  -4   6  -2  140.49   12.60
   6   4  -2  139.19    9.90
  -4  -6   2  114.69   11.00
  -4   6  -2  145.09   12.40
  -4  -6   2  143.59   11.20
   6  -4   2  137.79    8.90
  -6  -4  -2  134.89    9.30
   4  -6  -2  122.89   12.30
   6   4  -2  132.59   11.00
   4  -6  -2  135.69   11.20
  -6  -4  -2  133.99   11.70
   4   6   2  145.19   12.40
   6   4  -2  141.29   12.80
  -6   4   2  142.59   12.00
  -6   5  -2  233.18   12.20
   6   5   2  232.18   12.90
  -5  -6  -2  215.18   15.60
   6  -5  -2  236.28   15.50
  -6   5  -2  236.08   17.90
  -5   6   2  241.18   16.60
  -6  -5   2  228.08   15.90
  -5   6   2  242.08   17.50
   5   6  -2  249.18   15.90
   6  -5  -2  231.08   18.00
  -5   6   2  226.28   12.20
   6  -5  -2  258.57   13.30
   5  -6   2  210.48   15.30
   6   5   2  236.98   17.40
  -6  -5   2  240.48   12.10
   5  -6   2  221.18   17.20
  -6  -5   2  222.08   15.90
  -5  -6  -2  227.58   15.90
   6   5   2  225.88   15.70
   5   6  -2  228.68   16.70
  -6   5  -2  230.18   16.50
   5  -6  -2  239.78   17.50
  -6   5   2  223.58   17.50
   6  -5   2  243.28   12.10
  -6   5   2  222.88   16.10
   5   6   2  216.48   16.80
   5   6   2  232.78   15.90
   6   5  -2  234.88   15.60
  -6  -5  -2  224.78   16.00
  -6  -5  -2  224.98   12.20
  -6  -5  -2  233.18   16.40
   6   5  -2  250.77   17.50
   5  -6  -2  218.58   15.30
  -5  -6   2  182.58   15.10
   6  -5   2  225.18   15.60
  -5   6  -2  242.68   17.80
  -5   6  -2  235.18   16.50
   5  -6  -2  244.68   12.30
  -6   5   2  222.98   13.00
   6  -5   2  243.98   18.20
  -5  -6   2  213.98   15.50
   6   6  -2  641.84   33.00
  -6   6  -2  570.34   25.60
  -6   6   2  541.95   27.20
  -6   6  -2  584.44   33.60
   6  -6  -2  552.44   32.90
   6   6   2  571.14   32.30
  -6   6   2  623.54   35.00
  -6   6   2  564.34   31.60
  -6  -6  -2  528.05   31.60
  -6  -6   2  587.14   33.10
  -6  -6   2  522.35   30.60
  -6   6  -2  622.14   34.70
   6  -6   2  559.54   33.00
   6  -6  -2  608.64   27.40
   6   6  -2  634.54   33.70
  -7   0   2   -1.10    4.00
   0  -7  -2    3.20    3.00
   0   7   2   -0.80    3.70
   0   7  -2   -1.40    2.60
   7   0  -2    3.20    4.00
   0  -7   2    0.90    2.40
   0   7   2    2.10    3.20
  -7   0  -2    4.60    4.60
  -7   0   2   -0.60    4.40
   0   7  -2    1.90    4.10
   0   7   2    0.50    4.20
   7   0   2    7.70    4.50
   0  -7   2    0.40    2.80
   0   7   2    0.80    2.80
   0   7  -2    0.20    3.90
  -7   0  -2   -3.90    3.80
   7   0   2    2.30    4.30
   0   7  -2    2.00    2.90
   0  -7  -2    1.60    3.00
  -7   0  -2    2.20    3.90
   7   0  -2   -1.00    4.70
  -7   0   2    1.30    3.80
   7   0  -2   -3.00    4.20
   7   0   2   -3.40    4.40
  -1  -7  -2   70.49    7.10
   1   7  -2   71.29    7.20
   7   1   2  105.09   10.60
   7  -1  -2   74.29    8.50
   7  -1  -2   76.29    8.80
   7   1   2   72.29    9.50
  -7   1  -2   69.19    9.50
  -1   7   2   68.59    6.50
   7   1   2   69.49    8.50
  -7   1  -2   61.19    7.30
   7  -1  -2   66.29    9.40
   1  -7   2   70.79    7.30
   1   7  -2   69.19    4.90
  -7   1  -2   72.89    8.70
  -1   7   2   68.79    7.60
  -7  -1   2   61.39    7.90
  -1   7   2   58.49    8.00
  -7  -1   2   83.79    9.30
  -1   7   2   75.19    9.20
  -1   7   2   70.39    6.40
  -1  -7  -2   72.79    8.80
  -7  -1   2   64.59    8.50
   1   7  -2   70.19    8.00
  -1   7  -2   62.19    5.30
  -1   7  -2   60.89    5.20
  -1  -7   2   63.89    4.80
  -1   7  -2   48.90    7.60
  -1   7  -2   64.09    8.00
   1   7   2   67.09    7.40
   1  -7  -2   58.79    7.20
  -7  -1  -2   59.19    7.90
  -1  -7   2   77.99    8.90
  -7   1   2   76.79    9.90
  -7  -1  -2   79.09    8.80
   7   1  -2  101.89   10.70
   7  -1   2   64.69    8.10
   1   7   2   65.69    5.30
  -7   1   2   56.09    7.10
  -1  -7   2   65.29    6.70
   1   7   2   60.49    5.30
  -7  -1  -2   65.59    8.40
   7  -1   2   68.59    9.80
   7  -1   2   65.69    8.00
   1   7   2   50.49    7.50
   7   1  -2   59.69    8.50
  -7   1   2   52.39    7.70
   7   1  -2   69.69    8.30
  -7   2  -2  490.45   27.00
  -7   2  -2  540.15   29.00
   7   2   2  511.05   28.40
  -2   7   2  543.55   25.50
  -2  -7  -2  534.85   28.30
   2   7  -2  553.64   30.20
  -7  -2   2  570.04   28.30
   2   7  -2  558.44   27.80
   7  -2  -2  544.75   28.30
  -2   7   2  553.54   29.00
  -2  -7  -2  536.15   27.40
   7   2   2  582.64   29.80
   2  -7   2  532.45   27.70
   7  -2  -2  541.85   27.70
  -2   7   2  505.55   25.30
  -2   7   2  575.44   33.50
   7  -2  -2  497.95   30.00
  -7  -2   2  526.25   28.40
  -2   7   2  547.05   28.30
  -7  -2  -2  527.85   28.70
   7   2  -2  563.74   28.40
   7  -2   2  514.15   30.20
   7  -2   2  566.24   32.90
  -2   7  -2  506.45   23.70
  -2  -7   2  534.65   27.10
  -7   2   2  534.85   28.60
   2  -7  -2  542.35   28.10
  -7   2   2  600.64   33.10
   7   2  -2  543.65   29.40
  -2   7  -2  552.34   28.30
  -2   7  -2  570.64   29.10
   7   2  -2  528.45   28.60
   2   7   2  547.95   28.70
  -7  -2  -2  567.64   29.00
  -7   2   2  509.45   27.40
  -2   7  -2  545.35   30.20
  -2  -7   2  508.85   28.20
   7  -2   2  520.65   27.20
  -2   7  -2  505.55   23.70
  -7  -2  -2  590.04   28.60
   2   7   2  565.44   28.30
  -3   7   2  172.68    9.70
   7  -3  -2  181.58   12.10
   3   7  -2  168.08   13.00
   7   3   2  165.18   13.10
  -3   7   2  183.68   13.90
  -7   3  -2  174.08   14.00
  -7   3  -2  171.98   11.50
  -7  -3   2  162.18   13.50
  -3   7   2  169.48   13.90
   7   3   2  165.98   12.70
  -3  -7  -2  160.08   12.80
   3  -7   2  163.28   13.20
   7  -3  -2  176.38   15.30
   7   3   2  192.68   15.10
  -7  -3   2  193.78   12.40
  -7   3  -2  190.28   15.40
  -3  -7  -2  170.38   12.60
   3   7  -2  173.08   13.20
  -7  -3   2  158.68   13.10
  -3   7   2  176.98   13.60
  -3   7   2  166.48    9.50
   7  -3  -2  174.78   13.00
   3   7   2  149.69   13.00
  -3  -7   2  155.58   12.90
  -3   7  -2  175.88   13.50
  -3   7  -2  169.98   13.70
  -7  -3  -2  181.58   12.30
   7  -3   2  175.38   13.50
  -7  -3  -2  166.58   13.40
   7   3  -2  160.18   12.60
  -3   7  -2  180.88   13.90
   3   7   2  169.28   13.30
  -3  -7   2  156.68   12.20
  -7   3   2  148.09   11.50
  -7  -3  -2  173.78   13.60
   7   3  -2  162.38   14.30
   3  -7  -2  174.18   13.60
   7  -3   2  157.18   15.00
   7  -3   2  184.98   11.70
   7   3  -2  190.78   14.90
  -7   3   2  188.38   15.00
  -7   3   2  152.18   13.20
   4  -7   2   56.29    9.10
  -7   4  -2   63.89    6.70
  -7  -4   2   60.69    7.40
  -4   7   2   37.40    7.20
   7  -4  -2   40.60    8.90
  -7   4  -2   49.00    8.80
  -4   7   2   50.09    4.50
  -4   7   2   40.30    7.80
   4   7  -2   55.99    8.70
  -4  -7  -2   65.89   10.30
   7   4   2   52.59    8.00
  -4   7   2   40.60    7.80
   4   7  -2   61.19    8.70
   7  -4  -2   53.59    8.10
  -4   7   2   57.59    4.90
   7  -4  -2   46.80    6.40
   7   4   2   48.70    6.90
   7   4   2   53.39    9.30
  -4  -7  -2   38.00    7.30
  -7  -4   2   31.90    7.40
  -7   4  -2   55.29    9.40
  -7  -4   2   45.80    7.60
   7   4  -2   63.39   10.00
   7  -4   2   49.30    5.90
  -4   7  -2   41.60    8.00
   7   4  -2   60.09    7.30
  -7   4   2   42.00    7.90
  -7  -4  -2   47.60    6.10
   7  -4   2   48.20    9.50
   7   4  -2   43.30    7.30
   4   7   2   36.60    7.90
   7  -4   2   53.19    8.50
  -7  -4  -2   38.90    7.20
   4   7   2   55.19    8.20
  -4   7  -2   68.89    9.80
  -4  -7   2   41.80    7.50
  -7  -4  -2   49.30    8.10
  -7   4   2   55.29    6.70
  -7   4   2   53.29   10.00
   4  -7  -2   57.59    9.10
  -4  -7   2   54.79    7.90
  -7  -5   2  300.37   15.50
  -5  -7  -2  296.27   19.00
   7  -5  -2  330.37   19.00
   7   5   2  294.57   23.70
  -5   7   2  267.87   14.20
  -5   7   2  298.47   14.50
  -7   5  -2  289.27   15.40
  -7  -5   2  306.57   19.50
  -5   7   2  324.07   21.20
  -7   5  -2  360.86   28.60
   5  -7   2  283.47   20.20
   5   7  -2  323.27   20.40
  -5  -7  -2  306.47   23.70
   7   5   2  297.67   16.50
  -5   7   2  299.17   24.10
  -7   5   2  283.67   19.50
  -5   7  -2  267.87   20.30
   5  -7  -2  286.57   20.40
   7  -5   2  295.47   15.40
   7   5  -2  268.77   16.00
  -5  -7   2  259.57   18.20
  -7  -5  -2  282.27   15.50
  -5  -7   2  252.47   18.50
   5   7   2  248.58   19.50
  -5   7  -2  338.27   22.60
  -7   5   2  274.97   16.10
  -7   6  -2   52.69    9.30
  -7  -6   2   62.89    4.20
  -6   7   2   61.19   10.70
  -6  -7  -2   65.09   10.20
   6  -7   2   47.60    9.60
  -7   6  -2   55.39    5.20
  -6   7   2   62.79    5.60
   6   7  -2   56.09    9.90
   7  -6  -2   75.69   12.70
  -7  -6   2   64.19    4.30
   7   6   2   47.10   10.00
   7  -6  -2   66.79    6.60
  -6   7   2   51.89    5.30
   7   6   2   52.39    5.70
  -7  -6   2   53.49    9.10
   6  -7  -2   48.30   10.00
  -6   7  -2   73.19   11.10
   6   7   2   49.40    9.70
   7   6  -2   65.29   11.00
  -7   6   2   57.99   10.10
   7  -6   2   60.59   10.60
  -7  -6  -2   43.50    8.60
  -7   6   2   64.09    7.00
  -6  -7   2   54.89    9.60
   7  -6   2   62.19    5.10
  -7  -6  -2   57.79    4.90
  -7   7  -2    8.80    7.60
   7  -7  -2    7.70    3.30
   7  -7   2    2.30    7.90
  -7  -7  -2   12.90    7.00
   7  -7  -2    6.60    7.80
  -7   7   2    6.30    6.80
  -7  -7   2    3.50    6.40
  -7   7   2    4.10    3.00
   7   7   2    3.20    7.60
   7   7  -2   10.40    8.10
   0   8  -2   25.50    6.60
   0   8  -2   19.10    4.30
   0   8   2   25.80    6.60
   8   0  -2   17.50    6.90
   8   0   2   16.40    5.80
  -8   0  -2   19.80    6.00
   0   8  -2   21.80    4.50
   0   8   2   19.10    4.60
  -8   0   2   17.80    6.50
  -8   0  -2   23.00    6.50
   0   8  -2   25.00    6.90
   0  -8   2   21.60    4.00
  -8   0  -2   23.10    9.00
  -8   0   2   15.80    5.80
   0  -8   2   24.80    4.50
   8   0   2   17.10    6.70
   0   8   2   23.90    5.10
   0  -8  -2   20.00    4.50
   0   8   2   20.80    6.80
   8   0   2   20.80    6.30
   8   0  -2   21.10    6.00
   8   0  -2   19.00    6.10
  -1  -8  -2  400.36   22.00
  -1   8   2  429.46   24.80
   8  -1  -2  397.06   25.70
  -1   8   2  419.76   24.30
  -8  -1   2  403.26   24.20
   1   8  -2  404.36   22.10
  -1  -8  -2  392.76   23.80
   8   1   2  425.16   24.90
  -8  -1   2  455.05   24.90
  -8   1  -2  408.16   24.40
  -8   1  -2  357.56   22.80
  -1   8   2  391.46   21.10
   8   1   2  406.46   25.00
  -1   8   2  401.06   21.20
   8  -1  -2  403.56   23.90
  -8  -1   2  346.07   23.40
   1  -8   2  415.56   23.70
   8  -1  -2  391.66   23.60
  -1   8   2  424.16   22.80
  -8   1  -2  462.45   26.10
   8   1   2  407.26   24.10
   1   8  -2  416.76   24.10
   1   8  -2  390.56   19.50
   1   8   2  391.46   19.90
  -8  -1  -2  419.96   24.10
  -1   8  -2  434.66   22.70
   1   8   2  434.56   24.30
  -8  -1  -2  475.05   25.20
  -8   1   2  465.75   26.00
  -1   8  -2  428.56   20.30
   1  -8  -2  450.55   22.90
  -1   8  -2  480.05   25.40
  -1   8  -2  434.66   24.30
   8   1  -2  434.36   24.00
   8   1  -2  424.16   25.10
   1   8   2  480.25   23.40
   8  -1   2  399.36   25.90
   1   8   2  429.96   20.30
  -1  -8   2  428.06   21.70
  -8   1   2  416.96   23.70
  -1   8  -2  429.76   20.30
  -8  -1  -2  404.46   24.40
   8  -1   2  432.56   23.90
   8   1  -2  400.96   24.90
  -8   1   2  434.86   24.50
   8  -1   2  454.85   24.60
  -8  -2   2  679.13   35.00
  -2   8   2  690.63   35.60
  -8  -2   2  600.14   34.70
  -8   2  -2  651.13   35.20
  -2   8   2  625.94   31.00
   2   8  -2  645.04   33.50
   2   8  -2  662.23   34.70
   2  -8   2  675.83   33.90
  -8   2  -2  723.73   37.20
   8  -2  -2  616.84   34.20
  -2   8   2  679.63   34.40
  -2  -8  -2  617.44   34.30
  -2  -8  -2  643.34   33.20
   8  -2  -2  640.84   36.90
   8   2   2  622.94   34.90
  -2   8   2  710.93   37.50
  -8   2  -2  623.24   33.30
  -8  -2   2  706.93   34.80
  -2   8   2  677.03   31.20
   8   2   2  690.73   35.90
   8   2   2  707.83   35.40
   8  -2  -2  696.83   34.20
   2   8   2  701.83   34.30
   8  -2   2  724.13   33.90
  -2   8  -2  627.34   29.20
   8   2  -2  705.73   34.80
  -8   2   2  651.73   33.80
  -2  -8   2  653.13   32.90
  -2  -8   2  641.34   34.50
  -2   8  -2  619.64   29.10
  -8  -2  -2  745.13   35.20
  -2   8  -2  719.13   35.70
   8   2  -2  655.83   35.10
  -8   2   2  774.12   37.50
   8  -2   2  636.54   35.80
  -8   2   2  654.43   35.00
  -2   8  -2  655.63   34.20
  -8  -2  -2  673.03   35.20
   8   2  -2  701.03   36.40
   2  -8  -2  698.13   34.30
  -8  -2  -2  627.64   34.80
   8  -2   2  651.93   37.00
  -3   8   2  759.22   34.80
  -8  -3   2  847.92   38.60
  -3   8   2  708.03   34.60
  -8   3  -2  882.61   48.00
   8   3   2  706.73   38.50
  -3   8   2  772.92   44.70
  -8   3  -2  707.23   37.10
   8  -3  -2  761.22   37.70
  -3  -8  -2  727.03   38.20
   3  -8   2  746.43   38.80
  -8  -3   2  725.63   39.10
  -3   8   2  751.42   39.50
   8   3   2  770.42   40.90
   8  -3  -2  859.41   51.89
   3   8  -2  752.82   38.70
  -8   3   2  732.43   39.40
  -3  -8   2  782.22   38.00
  -8  -3  -2  779.72   41.40
   8  -3   2  783.82   37.60
   8  -3   2  888.11   52.19
   8   3  -2  930.31   50.69
   8   3  -2  814.82   39.70
   3   8   2  783.12   39.20
  -3   8  -2  774.62   39.70
  -3  -8   2  691.93   38.70
   8   3  -2  759.62   38.90
  -8   3   2  760.72   37.90
   3  -8  -2  760.62   39.30
  -8  -3  -2  805.32   38.40
  -8   4  -2  182.28   12.30
  -4  -8  -2  156.88   14.40
   8  -4  -2  171.78   17.50
   4   8  -2  187.08   15.20
   8   4   2  200.08   17.00
  -8  -4   2  192.98   13.10
   8   4   2  171.18   13.50
  -4   8   2  167.68    9.20
   8  -4  -2  167.48   12.60
   4  -8   2  172.38   15.20
  -4  -8  -2  187.08   14.20
  -4   8   2  181.28    9.30
  -4   8   2  170.18   15.50
  -8   4  -2  184.18   15.90
  -4   8   2  174.38   15.60
  -8  -4   2  198.48   16.70
   4  -8  -2  190.28   15.90
  -8   4   2  187.88   15.60
  -8  -4  -2  179.98   15.30
  -8   4   2  179.68   12.70
  -4   8  -2  185.08   15.80
  -4  -8   2  169.78   14.70
   4   8   2  182.88   15.50
   8   4  -2  182.38   16.70
   8  -4   2  177.78   12.20
  -8  -4  -2  171.88   12.60
   8  -4   2  165.38   17.20
  -4   8  -2  163.68   15.40
  -4  -8   2  171.38   13.70
   8   4  -2  182.58   13.80
   8  -5  -2   61.49   11.60
   8   5   2   70.69   11.20
  -8   5  -2   59.69   10.10
   8  -5  -2   79.89    8.20
  -8  -5   2   61.39   10.20
  -8  -5   2   75.09    7.60
  -5   8   2   69.19   11.30
   5  -8   2   73.69   11.60
  -5  -8  -2   65.19   10.20
  -5   8   2   68.59    4.30
  -8   5  -2   73.09    7.50
  -5   8   2   70.79    4.40
  -5  -8   2   77.49   10.60
  -5   8  -2   61.49   10.60
   8   5  -2   53.99   10.60
  -8  -5  -2   73.29    7.60
  -8   5   2   66.69    7.70
   8  -5   2   59.49   11.90
   5   8   2   58.59   10.80
   8   5  -2   64.29    8.10
  -8  -5  -2   55.49    9.70
  -8   5   2   71.59   10.50
   5  -8  -2   62.39   11.20
   8  -5   2   78.09    7.50
   8   6   2   16.90    4.60
  -8  -6   2   12.90    7.30
  -8   6  -2   22.50    8.20
  -8  -6   2   17.30    3.90
   6  -8   2   22.50    9.00
   8   6   2   22.30    9.50
  -6  -8  -2   17.00    7.60
   6   8  -2   20.00    8.50
   8  -6  -2   23.00    9.80
   8  -6  -2   26.10    5.40
  -8   6  -2   23.20    4.10
  -6   8   2   29.80    8.80
  -8  -6   2   22.10    3.80
   8  -6   2   31.40   10.60
   6  -8  -2   25.30    9.10
  -6  -8   2   13.50    7.60
   6   8   2   18.10    8.30
  -8  -6  -2   21.40    8.60
  -8  -6  -2   25.20    4.20
   8   6  -2   17.40    8.40
  -6   8  -2   21.20    8.20
  -8   6   2   20.80    4.90
  -8   6   2   13.80    7.40
   8  -6   2   20.90    4.20
   8   7   2  501.15   32.20
  -8  -7   2  491.95   30.00
  -7  -8  -2  517.15   30.50
   7   8  -2  528.45   32.00
  -8   7  -2  537.95   31.50
   7  -8   2  537.65   32.60
   8  -7  -2  552.64   24.60
   8  -7  -2  479.05   32.40
  -7   8   2  537.95   31.50
   7   8   2  470.85   31.50
   8  -7   2  483.35   32.50
  -7   8  -2  493.45   31.10
  -8   7   2  444.76   24.20
  -8  -7  -2  474.15   30.10
   7  -8  -2  495.25   32.30
   8   7  -2  501.75   32.30
  -7  -8   2  444.46   29.50
  -8   7   2  495.55   30.80
  -8   8   2  470.65   29.50
   8  -8   2  393.96   30.00
  -8   8   2  419.56   19.90
  -8   8   2  410.96   19.80
  -8   8  -2  461.95   30.40
  -8  -8  -2  465.55   29.10
   8  -8  -2  424.86   30.90
   8   8   2  416.06   30.00
   8   8  -2  469.65   30.90
  -8  -8   2  470.95   29.00
  -9   0   2   18.70    6.90
   9   0   2   18.50    7.30
   9   0  -2   24.60    8.40
  -9   0   2   21.40    7.20
  -9   0  -2   18.00    8.00
   0   9   2   16.70    5.20
  -9   0  -2   23.00    6.70
   0   9   2   25.30    5.00
   0   9   2   27.30    8.40
   0   9  -2   20.50    4.70
   9   0   2   16.90    8.10
  -9   0  -2   16.10    7.30
   0   9   2   17.00    5.00
   0   9  -2   16.70    4.50
   0  -9   2   21.40    4.30
   9   0  -2   14.10    6.70
   0  -9   2   22.80    4.60
   0   9  -2   26.20    7.90
   1   9  -2   26.90    8.20
  -1   9   2   22.90    5.80
  -9  -1   2   27.70    7.40
   1   9  -2   27.40    3.20
   1   9  -2   27.40    3.20
   1  -9   2   27.80    6.00
   9   1   2   26.80    8.80
  -9  -1   2   26.80    7.50
  -9   1  -2   30.90    7.20
  -9   1  -2   25.60    7.70
   9   1   2   36.70    9.10
  -1   9   2   34.70    5.30
   9  -1  -2   44.40    8.80
  -1   9   2   26.30    5.20
  -1  -9  -2   33.80    6.00
   1   9  -2   25.50    5.70
   9  -1  -2   30.50   14.40
  -1   9   2   31.50    7.90
   1   9   2   26.10    6.20
  -1   9  -2   32.80    4.40
   9   1  -2   33.80   10.50
   9   1  -2   22.20    7.70
   1  -9  -2   31.40    6.20
  -9   1   2   25.40    7.50
   1   9   2   34.50    4.00
   9  -1   2   33.50   10.70
   1   9   2   28.40    3.90
   9  -1   2   26.30    7.30
  -9  -1  -2   41.00    9.00
  -1   9  -2   36.50    6.50
  -9  -1  -2   24.80    7.60
  -1   9  -2   21.80    7.70
  -1  -9   2   31.40    5.40
  -9   1   2   24.40    6.60
  -1   9  -2   35.40    4.60
  -2   9   2   30.50    6.90
   9  -2  -2   22.50    9.30
   9   2   2   25.10    8.10
  -9  -2   2   23.50    7.00
  -2  -9  -2   16.70    7.20
  -9   2  -2   25.60    7.70
   2   9  -2   32.50    6.70
   2  -9   2   28.20    6.60
  -9  -2   2   32.50    8.20
  -2   9   2   21.70    4.20
  -2   9   2   20.20    7.30
  -2   9   2   25.90    4.50
   9   2   2   22.50    7.50
  -2  -9  -2   37.40    6.50
   9  -2  -2   25.70    6.90
   9  -2   2   21.60    9.00
   9   2  -2   19.10    7.30
  -2   9  -2   29.60    8.70
  -9   2   2   18.80    6.40
   9   2  -2   38.30    9.40
   9  -2   2   24.20    6.80
  -9  -2  -2   18.10    7.30
  -2  -9   2   24.80    7.10
   2   9   2   23.10    6.60
  -9   2   2   12.10    6.80
  -2  -9   2   20.80    5.50
  -2   9  -2   30.90    7.20
   2  -9  -2   17.30    6.10
  -9  -2  -2   21.80    7.00
  -9   3  -2  430.56   26.30
  -9  -3   2  451.95   24.60
  -9   3  -2  409.66   23.40
   3   9  -2  438.76   24.80
  -3  -9  -2  405.86   25.20
   9  -3  -2  401.46   28.00
  -9  -3   2  397.26   25.40
  -3   9   2  425.56   19.80
  -3  -9  -2  437.76   24.10
   9   3   2  406.36   26.90
   3  -9   2  418.26   24.80
  -3   9   2  423.36   27.70
   9  -3  -2  441.46   24.10
  -3   9   2  394.66   19.60
  -3   9   2  432.66   26.60
   9   3   2  412.76   25.10
   9  -3   2  422.76   23.50
   9  -3   2  404.16   28.20
  -9  -3  -2  422.66   24.40
   9   3  -2  391.36   25.00
  -3   9  -2  430.26   26.40
  -3  -9   2  415.36   23.50
  -9   3   2  386.16   25.50
  -3  -9   2  399.86   25.10
  -9  -3  -2  396.96   25.60
  -3   9  -2  421.16   25.40
   3   9   2  401.36   24.80
   3  -9  -2  406.66   24.90
   9   3  -2  422.46   27.30
   9  -4  -2  372.56   27.80
   9   4   2  383.86   23.80
  -4   9   2  438.46   26.30
   9   4   2  376.66   26.50
  -4   9   2  440.16   26.80
  -9  -4   2  394.76   25.10
  -9   4  -2  379.36   22.10
  -9  -4   2  423.86   23.20
   4   9  -2  378.66   24.70
   9  -4  -2  401.96   22.80
  -9   4  -2  390.86   25.90
  -4  -9  -2  379.36   24.90
   4  -9   2  417.16   25.40
   9  -4   2  410.56   28.30
   9   4  -2  390.56   27.10
  -4   9  -2  422.36   26.10
   4  -9  -2  410.56   25.50
  -4  -9   2  381.96   24.90
  -9   4   2  411.36   25.90
  -9  -4  -2  425.16   23.10
   9  -4   2  427.76   22.40
  -9   4   2  379.36   22.60
  -9  -4  -2  383.26   25.30
  -4   9  -2  444.76   26.70
   9   4  -2  390.86   23.90
   5   9  -2    8.90    7.50
   9  -5  -2    5.90    5.00
  -5   9   2    3.30    7.80
   9   5   2    2.80    5.30
  -9   5  -2    6.70    7.40
  -9  -5   2   12.10    7.80
  -9  -5   2    6.60    4.60
   5  -9   2    7.40    7.10
   9   5   2   16.90    9.40
  -5  -9  -2    7.00    7.30
   9  -5  -2    3.40    8.30
  -9   5  -2   12.60    4.70
  -9   5   2   12.40    4.90
   5   9   2   12.60    7.70
  -9  -5  -2    7.20    7.70
   9  -5   2    1.60    8.40
  -9   5   2   18.60    8.30
  -5   9  -2    9.50    7.90
   9  -5   2    7.20    4.50
   9   5  -2    2.00    7.60
  -5  -9   2    8.40    7.30
   9   5  -2    8.40    5.60
  -9  -5  -2   14.70    5.20
   5  -9  -2    6.70    7.30
   9  -6  -2   36.60   11.50
   9   6   2   29.50    6.10
  -9  -6   2   33.20    5.60
  -6   9   2   42.60   11.10
  -9  -6   2   25.60    9.20
  -9   6  -2   26.50    9.60
   9   6   2   37.80   11.10
   6   9  -2   26.60    9.60
  -9  -6   2   46.30    5.50
  -6  -9  -2   32.00    9.00
   6  -9   2   26.60    9.80
  -9   6  -2   32.90    5.40
   9  -6  -2   45.60    6.80
  -6   9  -2   26.40   10.60
   6   9   2   40.20   10.60
  -9  -6  -2   29.60    9.30
  -6  -9   2   23.40    9.00
   6  -9  -2   30.90   10.10
  -9   6   2   51.59   11.30
   9  -6   2   34.60    5.30
   9  -6   2   36.60   11.70
   9   6  -2   33.10   11.30
  -9   6   2   32.60    5.90
  -7  -9  -2    7.50   10.70
  -9   7  -2    4.90    2.40
   9   7   2    4.80   15.30
  -9  -7   2    0.10    8.10
  -7   9   2    1.20    8.70
   9  -7  -2  -11.70    8.20
   7  -9   2    7.20    9.10
   7   9  -2    2.90    8.70
   9  -7   2    5.80   10.00
   9   7  -2    0.50    9.70
  -9  -7  -2    7.00    9.80
   7   9   2   16.10    9.70
  -7  -9   2    8.50    8.40
  -9   7   2    7.70    8.80
  -9   7   2    5.40    3.90
   7  -9  -2    9.50    9.30
   9   8   2   32.10   12.20
  -8  -9  -2   32.50   10.80
  -9   8  -2   29.00   10.80
   8  -9   2   38.20   11.60
   9  -8  -2   37.20   13.20
   8   9  -2   44.70   12.80
  -9  -8   2   44.40   11.90
  -8   9   2   49.70   11.90
   8  -9  -2   32.30   11.70
   9  -8   2   27.60   11.70
  -9  -8  -2   33.50   10.40
   9   8  -2   57.19   13.90
  -8  -9   2   25.80    9.80
   8   9   2   19.00   10.80
  -9   8   2   31.20   11.40
  -8   9  -2   34.20   10.90
   0  10  -2   -2.90    3.70
  10   0   2   -7.10    6.00
   0  10  -2    4.20    4.20
   0  10  -2    0.40    6.80
   0  10  -2   -0.10    3.60
   0  10   2   -3.50    4.20
   0  10   2    0.50    4.00
   0  10   2    2.20    4.40
 -10   0  -2    2.10    6.90
  10   0  -2    0.70    7.30
 -10   0   2   -2.70    6.30
   0  10   2   -2.60    3.80
   0 -10   2    0.20    3.50
   0  10   2    7.60    7.60
  10   0   2   -1.50    6.90
  10   0  -2    1.90    7.50
  10  -1  -2   74.09   11.10
   1 -10   2   62.49    8.10
  10   1   2   51.69   10.70
  10   1   2   64.89   11.10
  -1  10   2   70.19    7.50
 -10   1  -2   62.49   10.30
  -1  10   2   78.39    8.00
   1  10  -2   62.29    8.40
   1  10  -2   57.69   10.30
 -10  -1   2   74.29   11.50
  10  -1  -2   86.99   13.40
  -1  10   2   70.39   12.00
  -1  10   2   79.59    9.40
   1  10   2   63.59    4.80
  10   1  -2   65.59   11.20
  -1  10  -2   61.99    8.30
  -1  10  -2   57.99    6.20
   1 -10  -2   67.79    8.50
  10   1  -2   65.09   11.40
 -10   1   2   77.89   11.60
  -1  10  -2   69.79    6.30
  -1 -10   2   79.29    8.10
   1  10   2   73.49   12.30
   1  10   2   66.59    5.00
   1  10   2   76.89    9.60
  10  -1   2   53.99   11.60
  10  -1   2   67.09   13.80
 -10  -1  -2   60.29   10.60
  -1  10  -2   63.09   10.90
  -2 -10  -2   42.90   10.00
   2 -10   2   48.30    8.40
  -2  10   2   41.80   10.20
 -10   2  -2   44.20    8.90
  -2  10   2   50.69    5.70
  -2  10   2   56.69    9.10
  10   2   2   54.19   11.10
  10   2   2   41.10    9.90
  -2 -10  -2   53.39    7.80
  -2  10   2   44.10    5.30
 -10   2  -2   39.00    9.70
 -10  -2   2   42.30    9.50
  10  -2  -2   37.00   11.40
   2  10  -2   49.50    8.30
  10   2  -2   46.90    9.90
  -2 -10   2   51.39    7.30
   2  10   2   44.80    8.50
  10   2  -2   57.39   11.80
   2 -10  -2   51.19    8.50
  10  -2   2   62.29    9.80
  10  -2   2   47.10   12.00
 -10   2   2   54.39   10.30
 -10  -2  -2   37.60    9.30
  -2  10  -2   49.90   10.90
  -2  10  -2   53.19    8.60
   3 -10   2   35.90    8.50
  -3  10   2   26.70    9.10
   3  10  -2   41.60    8.90
  -3  10   2   39.20    8.70
 -10   3  -2   43.50   10.40
 -10   3  -2   32.70    7.20
  10  -3  -2   40.80    8.20
  -3  10   2   34.80    3.50
 -10  -3   2   38.00    9.70
  10  -3  -2   38.90   11.20
 -10  -3   2   32.60    8.10
  -3 -10  -2   26.80    8.50
  10   3   2   42.90   10.80
  10   3   2   28.20    8.50
  -3  10   2   34.30    3.40
  -3  10  -2   39.60    8.60
 -10  -3  -2   48.70    8.80
 -10  -3  -2   42.60    9.60
 -10   3   2   37.10    9.30
  10   3  -2   45.70    9.50
  10  -3   2   45.40    8.30
  -3  10  -2   29.40    9.30
  -3 -10   2   47.80    7.90
   3 -10  -2   37.60    8.40
  10   3  -2   42.80   10.90
  10  -3   2   38.20   11.60
   3  10   2   35.60    8.70
  -3 -10   2   40.90   10.10
 -10   3   2   42.70    8.10
  10   4   2   10.70    9.10
  10  -4  -2   14.30    6.40
  -4  10   2   10.60    8.50
 -10  -4   2   12.60    8.10
  -4 -10  -2    1.50    7.20
  10  -4  -2    8.40    9.10
  10   4   2    7.30    6.70
 -10   4  -2    8.10    8.30
   4  10  -2    5.80    7.50
 -10  -4  -2    7.10    7.50
  10   4  -2    2.70    8.50
 -10   4   2   11.60    8.10
 -10  -4  -2   13.90    6.00
  -4  10  -2   10.00    8.40
 -10   4   2    8.40    5.70
   4 -10  -2   18.70    8.10
  10   4  -2   14.20    7.20
  10  -4   2   12.70    6.10
   4  10   2    4.90    7.20
  10  -4   2   16.50   10.80
  -4 -10   2    8.50    7.60
  -5 -10  -2   26.50    9.70
 -10  -5   2   12.20    9.30
  10   5   2   21.40    7.10
  10  -5  -2   24.10   10.60
   5 -10   2   12.90    8.60
  -5  10   2   21.90    9.50
   5  10  -2   13.00    8.50
  10   5   2   18.00   10.10
 -10   5  -2   19.90    5.60
 -10   5  -2   14.60    9.00
  10  -5  -2   22.30    6.60
 -10  -5   2   19.90    6.10
 -10   5   2   18.50    5.70
  -5 -10   2   14.90    8.90
  10  -5   2   20.50    6.00
 -10   5   2    8.40    8.50
  10   5  -2   26.30    7.50
  -5  10  -2   28.60   10.10
  10   5  -2   21.10    9.70
  10  -5   2   28.30   10.90
 -10  -5  -2   20.60    9.40
 -10  -5  -2   15.90    5.80
   5 -10  -2    7.20    8.20
   5  10   2   15.00    8.70
  10   6   2  178.58   14.10
 -10   6  -2  222.98   20.70
 -10  -6   2  184.48   12.50
  10  -6  -2  214.78   14.30
  10  -6  -2  181.98   21.90
 -10   6  -2  170.68   12.60
 -10  -6   2  203.98   27.10
  -6 -10  -2  164.38   18.10
  10   6   2  195.68   21.30
   6 -10   2  157.98   18.10
   6  10  -2  211.68   20.20
  -6  10   2  209.28   20.40
  10  -6   2  210.38   13.20
 -10  -6  -2  203.18   12.90
   6 -10  -2  194.28   19.40
  10  -6   2  153.48   20.50
 -10   6   2  177.48   13.40
  10   6  -2  247.58   22.70
  -6  10  -2  221.38   20.90
 -10   6   2  212.28   27.00
   6  10   2  201.08   20.20
 -10  -6  -2  183.78   18.90
  -6 -10   2  180.08   18.70
   7  10  -2   54.69   14.60
  -7  10   2   68.79   13.30
 -10   7  -2   83.59   14.10
  10   7   2   82.09   15.90
   7 -10   2   69.29   13.40
  10  -7  -2   55.49   14.10
  10  -7  -2   82.39    8.20
  -7 -10  -2   50.19   11.80
 -10  -7   2   62.29   12.80
  10   7  -2   63.49   13.60
  -7  10  -2   88.29   15.50
  -7 -10   2   46.10   11.70
 -10  -7  -2   83.79   14.10
   7 -10  -2   58.59   15.00
   7  10   2   58.49   13.30
  10  -7   2   59.49   14.30
 -10   7   2   58.29   13.10
   0  11   2  833.12   38.90
   0  11  -2  881.31   45.70
 -11   0   2  826.82   44.50
   0  11  -2  803.02   39.20
   0  11  -2  800.72   38.10
  11   0   2  787.62   46.00
   0  11   2  914.41   46.20
  11   0  -2  839.42   45.30
  11   0  -2  831.72   46.60
   0  11   2  832.72   40.50
 -11   0  -2  860.61   45.00
   0  11   2  805.62   40.10
   0  11   2  742.43   38.30
  11   0   2  864.61   44.80
   0  11  -2  792.92   38.90
   1  11  -2  339.07   21.20
 -11  -1   2  359.66   25.20
  -1  11   2  327.17   19.40
  11   1   2  408.66   26.80
  -1  11   2  390.06   26.70
   1  11  -2  390.26   26.50
  -1  11   2  363.86   20.00
   1 -11   2  392.26   21.00
 -11   1  -2  354.66   25.20
  11   1   2  351.76   26.40
  -1  11   2  362.26   21.50
  11  -1  -2  367.26   27.80
  11  -1  -2  387.66   25.20
  11   1  -2  325.87   26.20
  -1  11  -2  344.67   18.00
 -11  -1  -2  376.56   25.90
  -1  11  -2  368.36   21.20
  -1  11  -2  345.17   17.80
  11  -1   2  363.06   24.80
  -1  11  -2  421.06   27.00
   1  11   2  345.27   22.10
   1  11   2  351.96   25.90
 -11   1   2  400.66   25.70
  11   1  -2  430.46   27.60
  11  -1   2  386.06   28.00
  11  -2  -2   39.30   11.40
   2  11  -2   31.90   10.50
  11  -2  -2   50.19   10.10
 -11   2  -2   40.30   10.30
   2  11  -2   46.70    8.50
 -11  -2   2   40.90   10.70
  -2  11   2   59.19    5.80
  -2 -11  -2   54.99    8.20
  -2  11   2   47.70   11.10
  11   2   2   40.80   11.10
   2 -11   2   53.09    8.60
  -2  11   2   50.59    9.10
  -2  11   2   42.10    5.10
  11   2   2   52.19   11.10
 -11  -2  -2   44.80   10.90
  -2 -11   2   55.49    7.60
  11   2  -2   39.20   10.30
  -2  11  -2   56.89   11.60
 -11   2   2   35.70   10.20
  11  -2   2   44.70    9.70
   2  11   2   47.10   11.00
  11  -2   2   50.09   12.80
  -2  11  -2   52.49    8.80
   2 -11  -2   55.99    9.00
   2  11   2   61.59   10.00
  11   2  -2   59.59   12.90
 -11   3  -2    6.70    9.10
   3  11  -2    7.80    7.10
 -11  -3   2   14.50    8.50
  11  -3  -2   11.90    7.40
  11   3   2   13.00    8.10
  11   3   2    0.70    8.70
   3 -11   2    2.70    6.60
  11  -3  -2    9.00    9.50
  11  -3   2    6.60    6.50
 -11   3   2    6.30    8.10
  -3  11  -2    8.40    6.50
   3 -11  -2    1.40    6.20
   3  11   2   21.30    8.20
 -11  -3  -2    2.40    7.90
  11  -3   2   18.80   10.50
  11   3  -2   -6.70    8.10
  11   3  -2   14.60    8.50
  11   4   2   29.30    9.20
   4 -11   2   24.40    8.50
  11   4   2   23.60   10.70
  -4 -11  -2   24.60    9.40
  11  -4  -2   34.80    8.00
 -11   4  -2   32.40   10.60
  11  -4  -2   14.60   10.50
  -4  11   2   24.50   10.70
   4  11  -2   17.40    8.60
  -4 -11   2   35.30   10.50
   4  11   2   35.30    9.80
  -4  11  -2   29.90   10.70
  11  -4   2   33.00    7.70
   4 -11  -2   43.60   10.00
  11   4  -2   30.10   12.00
 -11   4   2   19.90   14.00
 -11  -4  -2   44.30   10.50
  11   4  -2   25.80    9.10
  11  -4   2   30.70   12.20
  11   5   2   -3.10    9.20
  -5 -11  -2   19.30    9.70
   5 -11   2   16.60    9.20
  11   5   2   10.50    7.40
 -11  -5   2   22.10   10.20
   5  11  -2   11.30    8.90
  11  -5  -2   23.20    7.40
  11  -5  -2   13.80   11.60
 -11   5  -2   21.10   10.40
  -5  11   2   -0.10    9.80
  11  -5   2    9.80    6.10
  11  -5   2    9.80   11.40
 -11   5   2    6.20    9.20
   5 -11  -2   14.50    8.50
  11   5  -2   13.40   10.90
   5  11   2   12.80    9.30
 -11  -5  -2    4.00    9.20
  -5  11  -2    5.40   10.10
  -5 -11   2   10.00    8.60
  11   5  -2    7.40    7.10
 -12   0  -2  170.58   18.20
 -12   0   2  138.59   17.10
  12   0   2  230.08   20.50
   0  12  -2  184.08   12.60
  12   0   2  185.78   21.00
   0  12   2  209.88   14.50
   0  12   2  169.88   19.10
   0  12   2  181.58   10.80
   0  12  -2  216.78   21.20
  12   0  -2  191.58   21.60
  12   0  -2  159.98   17.90
  -1  12   2   35.80   12.10
 -12   1  -2   17.80   10.70
 -12  -1   2   38.60   11.30
   1  12  -2   25.70   10.30
   1  12  -2   25.60    6.60
  -1  12   2   36.80    6.10
  12  -1  -2   27.80   16.20
  12  -1  -2   21.90    9.20
  12   1   2   23.10   10.20
  -1  12   2   36.50    6.90
  12   1   2   20.10   11.80
  -1  12  -2   29.70   10.90
  12  -1   2   27.00    9.90
   1  12   2   30.60    7.70
  12   1  -2   25.90   10.80
 -12   1   2   33.20   10.70
   1  12   2   31.70   10.90
  12  -1   2    5.00   12.00
  12   1  -2   35.30   14.00
 -12  -1  -2   34.80   10.90
  12  -2  -2   58.09   14.40
  12   2   2   38.40   11.10
   2  12  -2   45.90    8.80
  12  -2  -2   45.10   10.50
   2  12  -2   43.80   12.40
 -12  -2   2   49.60   11.50
 -12   2  -2   35.10   11.30
  -2  12   2   50.29   13.00
  12   2   2   27.10   11.30
   2 -12   2   46.70    8.40
  12  -2   2   38.30   10.30
   2  12   2   43.80    9.20
 -12   2   2   27.30   10.10
  12  -2   2   49.80   12.90
  -2  12  -2   36.10   11.30
  12   2  -2   46.60   11.80
 -12  -2  -2   33.00   10.30
  12   2  -2   48.20   13.00
   2  12   2   63.29   13.30
   0   0  -3    0.60    0.30
   0   0   3   -0.20    0.60
   0   0   3    0.60    0.60
   0   0  -3    1.20    0.70
   0   0  -3    0.40    0.70
   1   0   3   18.60    1.80
  -1   0  -3   19.00    2.30
   0   1  -3   17.90    1.60
  -1   0   3   17.70    1.40
   0  -1  -3   17.70    1.80
  -1   0  -3   23.90    1.90
   0   1   3   19.00    1.60
   0  -1  -3   20.30    2.00
   0  -1   3   19.60    1.90
  -1   0   3   15.20    1.80
   0   1  -3   19.10    1.60
   0  -1  -3   18.20    1.60
   1   0  -3   13.40    1.80
   1   0  -3   16.90    1.30
  -1   0   3   14.00    1.80
   0   1  -3   21.40    1.90
   0   1   3   19.70    1.90
   0   1  -3   19.90    1.60
   0  -1   3   18.20    1.60
  -1   0  -3   11.60    1.40
   0   1   3   21.50    2.00
   1   0   3   16.90    1.80
   1   0   3   15.70    2.00
  -1   1  -3 1096.69   54.69
   1   1   3 1176.28   54.69
   1  -1   3 1066.09   54.49
  -1   1   3 1177.88   53.89
   1   1  -3 1184.98   57.49
   1   1   3 1068.79   56.79
   1  -1   3 1166.88   52.29
   1   1  -3 1097.69   52.69
  -1  -1  -3 1119.59   54.39
  -1  -1   3 1131.09   52.89
   1  -1   3 1122.09   52.09
  -1  -1   3 1080.99   56.49
  -1  -1  -3 1163.88   57.09
  -1   1   3 1172.18   56.09
   1  -1  -3 1161.38   53.79
   2   0  -3   97.79    5.40
   0   2  -3  105.99    5.60
   0   2  -3  102.79    5.60
   0  -2   3   98.29    5.40
  -2   0   3   99.69    6.10
   0   2   3   91.69    5.50
   0   2   3  103.79    5.70
  -2   0   3   93.19    5.40
  -2   0   3  100.59    6.00
   0   2  -3   89.79    5.40
   2   0  -3   97.09    6.10
  -2   0  -3   90.39    5.70
   2   0   3   94.19    5.80
   0   2  -3   89.09    5.00
   2   0  -3   94.59    5.90
  -2   0  -3   98.49    5.70
   0  -2   3   97.99    5.00
   0   2   3   93.09    5.60
   0  -2  -3   94.29    5.60
   2   0   3   91.89    5.60
   2   0   3   94.99    6.10
  -2   0  -3   91.59    6.00
  -2   1  -3  177.78    9.70
   1   2  -3  184.38    9.60
  -1   2   3  181.08   10.00
   1  -2   3  179.18    8.30
   2  -1  -3  185.48   10.40
   1   2  -3  192.18    9.40
   2   1   3  189.58    9.70
  -2  -1   3  192.08    9.60
   2   1   3  175.08    9.60
  -1   2   3  175.28    9.50
  -1  -2  -3  178.88    9.00
  -2  -1   3  169.88    9.80
   1  -2   3  179.48    9.90
   1   2  -3  176.18    8.80
  -1  -2  -3  186.08    9.60
  -2   1  -3  178.98    9.00
  -2   1  -3  185.98   10.40
  -1  -2  -3  182.48    9.80
   1  -2   3  161.68    9.50
   2   1   3  176.18    9.90
  -2  -1   3  187.28    9.40
   2  -1  -3  178.28    9.60
   2  -1  -3  180.88    9.40
  -1   2   3  181.18    9.30
  -2   1   3  188.18    9.70
  -2  -1  -3  193.28   10.00
  -1  -2   3  192.48    9.50
   1   2   3  200.28    9.70
  -2  -1  -3  189.28    9.70
  -1  -2   3  188.68    9.40
   1  -2  -3  193.98    9.30
   2   1  -3  193.78    9.30
   1   2   3  191.48    9.90
  -1   2  -3  190.68    8.30
  -2  -1  -3  199.78    9.80
  -2   1   3  208.78   10.40
   1   2   3  199.78    9.10
   2  -1   3  193.88   10.40
   2  -1   3  190.58    9.80
  -1  -2   3  191.08    8.90
   2   1  -3  190.78    9.60
  -1   2  -3  191.08   10.00
  -1   2  -3  197.78    9.80
   2   1  -3  206.38   10.20
  -2   1   3  192.58    9.50
   1  -2  -3  187.98   10.10
   2  -1   3  182.98    9.10
   2  -2  -3 4411.26  203.48
  -2   2   3 4481.25  203.58
  -2  -2  -3 4539.45  208.08
   2  -2  -3 4415.26  202.88
   2   2  -3 4446.85  207.98
  -2  -2   3 4457.45  202.48
   2   2   3 4635.04  204.58
  -2   2  -3 4326.97  196.58
   2  -2   3 4530.15  196.68
   2  -2   3 4592.84  205.18
  -2   2  -3 4766.32  205.98
   2   2  -3 4453.95  202.48
  -2   2   3 4418.36  203.88
  -2  -2  -3 4499.05  204.28
  -2  -2   3 4373.96  206.58
   2   2   3 4787.12  209.18
  -3   0   3 1837.22   92.49
   0   3   3 1875.81   93.19
  -3   0  -3 1841.02   94.29
   3   0  -3 1912.81   92.49
   0   3  -3 1837.82   92.59
   3   0  -3 1881.61   96.69
   3   0   3 1855.11   94.79
   0  -3   3 1816.02   88.29
   0  -3  -3 1914.11   92.59
  -3   0  -3 2179.98   96.09
   0  -3  -3 1889.61   93.09
   0   3  -3 1826.22   88.99
  -3   0   3 2025.70   97.19
   3   0   3 1913.21   94.99
   0   3   3 1955.50   93.59
   1   3  -3  125.29    6.40
  -1  -3  -3  130.69    7.70
  -1  -3  -3  131.39    7.70
   3   1   3  128.89    8.10
  -1   3   3  136.49    8.00
   3  -1  -3  130.49    7.80
  -3  -1   3  134.39    8.10
   3   1   3  145.79    8.10
  -1   3   3  130.79    7.90
   1  -3   3  137.19    5.80
  -3  -1   3  142.09    7.70
  -1   3   3  132.59    7.80
   3   1   3  127.69    7.90
  -3  -1   3  138.19    7.80
  -1   3   3  131.19    7.10
  -3   1  -3  145.29    7.40
   1   3  -3  143.59    7.60
  -3   1  -3  148.29    8.90
  -1   3   3  131.79    7.20
   1   3  -3  128.49    7.60
   1  -3   3  136.79    7.80
   3  -1  -3  131.29    8.60
   1  -3   3  128.49    7.80
   3  -1  -3  124.29    7.50
  -3   1  -3  124.49    7.90
   1  -3  -3  126.99    7.90
   1   3   3  124.49    6.70
   1   3   3  112.69    6.70
   3   1  -3  113.79    7.30
  -3   1   3  129.59    8.50
  -1   3  -3  124.99    7.80
  -1   3  -3  113.79    5.80
  -3  -1  -3  118.39    7.70
   3  -1   3  115.99    7.80
  -3  -1  -3  120.59    7.70
  -3   1   3  116.89    7.50
   1   3   3  131.09    7.70
   3  -1   3  133.59    8.70
   1   3   3  118.49    7.80
  -1   3  -3  120.39    7.80
  -3  -1  -3  132.19    8.00
   3   1  -3  115.99    7.70
   3   1  -3  126.29    8.10
  -1  -3   3  116.89    7.20
  -1  -3   3  118.49    7.50
  -3   1   3  117.99    7.60
   3  -1   3  125.79    7.20
  -1  -3   3  114.29    6.30
   2   3  -3 1735.63   93.59
  -2  -3  -3 1848.81   91.19
  -3   2  -3 1701.63   84.99
  -3  -2   3 1803.62   89.99
  -2   3   3 1814.22   92.09
   3   2   3 1858.61   91.59
  -2   3   3 1813.02   87.99
  -3   2  -3 1779.72   92.39
   3   2   3 1648.64   94.79
   2   3  -3 1839.72   89.99
  -2  -3  -3 1768.22   94.29
   3  -2  -3 1911.31   90.59
   2  -3   3 1770.62   91.79
   3  -2  -3 1835.22   90.99
  -3  -2   3 1869.51   95.69
   3  -2   3 1803.42   85.29
   3   2  -3 1847.62   96.89
  -3   2   3 1812.82   91.19
   3  -2   3 1731.03   92.49
  -2  -3   3 1821.02   92.39
  -3  -2  -3 1730.93   91.19
  -3   2   3 1769.22   90.79
   2   3   3 1859.71   95.69
  -2  -3   3 1753.12   89.49
   2  -3  -3 1827.42   91.29
   3   2  -3 1895.91   89.79
   2  -3  -3 1816.52   87.09
   2   3   3 1918.71   92.09
  -2   3  -3 1763.52   92.19
  -3  -2  -3 1753.32   95.19
   3   3  -3 1349.56   61.09
   3  -3   3 1342.77   59.29
  -3  -3   3 1382.86   59.89
  -3  -3   3 1383.76   59.79
  -3  -3   3 1317.97   61.19
  -3  -3  -3 1401.56   61.99
   3   3  -3 1418.36   62.09
  -3   3  -3 1360.16   59.39
  -3   3   3 1368.66   63.69
   3  -3  -3 1346.57   62.59
   3   3   3 1483.75   62.39
  -3   3   3 1368.36   60.59
   3  -3  -3 1334.17   61.39
   3   3   3 1402.26   61.49
  -3  -3  -3 1342.67   59.99
  -3  -3  -3 1319.47   61.39
  -4   0  -3 1686.93   73.89
   0   4   3 1653.93   72.49
   4   0   3 1563.24   73.79
   0   4  -3 1672.23   73.19
   4  -1  -3  954.10   45.20
  -1  -4  -3  951.30   43.70
  -1   4   3  957.50   43.10
   4   1   3  976.10   44.30
   1  -4   3  967.80   43.80
   1  -4   3  985.20   41.80
  -1   4   3  978.40   44.10
  -1  -4  -3  932.31   43.90
   4   1   3  975.50   44.40
  -4   1  -3  934.81   44.30
  -4  -1   3  968.70   43.90
  -1   4   3 1007.60   45.50
  -4   1  -3 1002.00   43.60
   1   4  -3  973.40   43.90
   4   1   3  989.00   44.60
   1   4  -3  936.71   43.40
  -4  -1   3  960.50   45.70
  -1   4   3  954.70   44.20
   1   4  -3  959.00   42.20
   4  -1  -3  907.31   43.70
  -1   4   3  987.50   43.20
   4  -1  -3  919.41   43.90
  -4  -1   3 1025.10   44.30
  -4  -1  -3 1033.20   44.50
  -4  -1  -3  949.31   44.20
   4   1  -3  940.31   44.30
   4  -1   3  960.90   45.10
  -4   1   3  949.90   44.00
   1   4   3  954.50   42.70
   1   4   3  947.91   42.50
  -4  -1  -3  986.00   44.40
  -1   4  -3 1005.90   44.20
  -1  -4   3  952.50   43.20
   4  -1   3  945.81   44.30
   1   4   3  960.00   43.90
   1  -4  -3  973.60   44.10
  -1  -4   3  979.90   42.20
  -1   4  -3  931.51   41.90
   4   1  -3  980.40   43.80
   1   4   3  953.80   45.20
  -1   4  -3  984.90   44.30
  -4   1   3  941.91   43.90
  -1  -4   3  927.21   43.80
   4   1  -3  902.51   44.40
   4  -1   3  951.60   43.50
  -2   4   3  146.09    9.90
   2  -4   3  132.39    9.50
  -4  -2   3  147.29    8.90
  -4  -2   3  134.69    9.10
  -4  -2   3  120.79    9.30
   4   2   3  139.99    9.00
   2  -4   3  127.29    9.10
  -4   2  -3  130.99    8.10
   4   2   3  133.39    9.20
  -4   2  -3  142.79   10.40
   4  -2  -3  124.89    9.80
   4  -2  -3  131.29    8.80
   2   4  -3  138.89    9.10
  -2   4   3  139.39    9.50
   2   4  -3  126.99    9.10
  -2   4   3  133.19    8.00
   4   2  -3  148.69   10.00
   2   4   3  148.89    7.30
   4  -2   3  148.79    8.20
  -2   4  -3  153.18   10.00
  -2   4  -3  149.69   10.80
  -4  -2  -3  136.79    9.60
  -4   2   3  159.08    9.10
  -4   2   3  144.69    9.30
  -2  -4   3  144.69    9.20
   2  -4  -3  160.08   10.20
  -4   2   3  170.78   10.70
   2   4   3  152.08    9.80
   2   4   3  154.48    9.40
  -4  -2  -3  165.08    9.20
  -2  -4   3  140.99    9.00
   4  -2   3  161.98    9.80
   4   2  -3  149.49    9.10
   2   4   3  141.49    7.40
  -3   4   3  304.77   17.40
   4  -3  -3  290.97   17.00
  -4  -3   3  322.07   15.90
  -4   3  -3  314.57   18.60
  -3  -4  -3  315.37   15.00
  -4   3  -3  321.47   17.70
   4  -3  -3  305.77   18.60
   3   4  -3  324.67   17.10
  -3   4   3  317.57   18.30
   3  -4   3  303.57   19.60
  -3  -4  -3  323.87   17.40
   4  -3  -3  312.47   16.30
   3  -4   3  292.07   17.20
  -4  -3   3  307.37   17.20
  -3  -4  -3  317.17   17.60
   4   3   3  337.87   18.30
  -4   3  -3  303.77   15.40
   4   3   3  300.27   16.20
  -3   4   3  297.97   15.80
   3   4  -3  330.27   20.30
   4   3   3  323.67   17.40
  -4  -3   3  290.97   17.40
   3  -4  -3  348.17   17.50
  -3   4  -3  331.37   17.90
   3   4   3  360.36   18.20
  -4   3   3  316.07   16.40
   3  -4  -3  350.66   18.90
  -4   3   3  334.77   17.60
   4  -3   3  324.27   15.40
  -4   3   3  344.97   18.90
   4   3  -3  347.47   17.20
   3  -4  -3  337.87   15.90
   3   4   3  314.57   17.30
  -4  -3  -3  340.97   16.20
   4   3  -3  326.37   16.10
  -4  -3  -3  325.97   17.90
  -3  -4   3  320.87   17.10
  -3  -4   3  331.27   14.40
  -4  -3  -3  318.07   17.30
  -3   4  -3  341.57   18.50
   4   3  -3  347.07   18.40
   4  -3   3  337.97   17.70
   4  -3   3  343.57   18.90
  -3  -4   3  340.07   17.40
   3   4   3  336.07   15.30
  -3  -4   3  335.77   14.40
   4  -4   3  521.65   22.60
  -4   4   3  512.65   27.10
  -4  -4   3  516.95   23.10
  -4  -4  -3  517.75   23.40
  -4  -4   3  528.75   23.10
   4   4   3  516.05   25.80
  -4   4   3  480.15   24.00
  -4   4  -3  512.55   26.10
   4   4  -3  499.65   26.30
  -4   4  -3  492.85   22.60
  -4  -4  -3  482.35   25.50
  -4  -4  -3  541.05   26.40
  -4  -4   3  462.85   25.50
   4  -4   3  491.25   25.70
   4  -4  -3  501.85   27.10
   4   4   3  508.85   26.50
  -4   4   3  512.45   25.90
   4  -4  -3  534.55   24.20
   4   4   3  510.35   23.60
   4  -4   3  478.35   26.70
  -4   4  -3  539.05   27.30
  -4  -4   3  477.75   25.30
   4  -4  -3  493.55   25.50
   4   4  -3  517.85   25.40
   0  -5  -3 6312.07  275.57
   0   5  -3 6163.88  279.07
   5   0   3 6131.09  282.77
   5   0  -3 5902.91  277.67
   0   5   3 5719.33  277.97
  -5   0  -3 6044.50  280.97
   0  -5  -3 6001.60  278.67
  -5   0   3 5922.21  282.87
   0   5  -3 6103.69  280.17
   0   5   3 5823.12  276.27
   0  -5   3 6005.90  270.17
   5   0  -3 5935.41  282.97
  -5   0  -3 6217.28  281.57
   0   5  -3 6036.60  271.27
   5   0   3 6351.66  282.07
   1  -5   3  418.26   17.70
   1  -5   3  395.96   19.70
  -1  -5  -3  409.46   19.80
  -1  -5  -3  394.26   20.30
  -5  -1   3  391.26   20.70
   5  -1  -3  408.26   21.80
  -1   5   3  431.46   20.40
   5   1   3  391.96   20.50
  -5   1  -3  383.36   20.60
  -5   1  -3  405.46   21.60
   5  -1  -3  405.86   20.20
  -1   5   3  417.06   20.70
   5   1   3  436.26   21.10
  -1   5   3  397.96   20.60
  -5  -1   3  401.26   20.30
   5   1   3  370.46   20.60
  -5  -1   3  439.36   22.40
  -5   1  -3  390.26   19.70
  -1   5   3  417.86   19.10
   1   5  -3  387.66   17.90
   1   5  -3  430.86   20.40
   5  -1  -3  416.56   20.50
  -1   5   3  393.16   19.10
   1   5  -3  401.66   19.50
   5  -1   3  349.67   21.10
   5   1  -3  325.37   20.30
  -5  -1  -3  380.16   20.50
  -5   1   3  348.67   19.90
   5   1  -3  380.06   20.70
   1   5   3  383.96   20.30
   1  -5  -3  375.96   19.90
  -1   5  -3  367.56   17.70
  -1   5  -3  367.16   20.30
   5  -1   3  371.16   20.40
  -1  -5   3  370.06   19.10
  -1   5  -3  385.36   20.40
  -5   1   3  415.36   21.60
   1   5   3  355.96   18.30
   1   5   3  404.66   20.10
  -5  -1  -3  393.06   22.10
   5   1  -3  370.06   19.90
  -1   5  -3  371.46   19.80
  -1  -5   3  389.26   17.90
   5  -1   3  373.06   19.70
   1   5   3  353.16   18.20
  -1  -5   3  372.76   20.10
  -5   1   3  392.16   20.40
  -5  -1  -3  365.76   20.40
  -5   2  -3  253.87   15.10
   2  -5   3  237.28   14.60
   5   2   3  251.07   14.80
  -5   2  -3  263.07   16.10
   5   2   3  269.07   15.70
  -2   5   3  263.97   13.10
   5  -2  -3  250.67   14.60
   5   2   3  268.87   14.80
  -2   5   3  271.47   15.20
   5  -2  -3  247.58   14.20
  -5  -2   3  253.07   14.60
  -5  -2   3  275.47   15.40
   5  -2  -3  227.68   15.80
   2   5  -3  252.27   14.40
   2   5  -3  275.07   14.80
  -5  -2   3  279.87   14.40
  -2  -5  -3  252.27   14.60
  -5   2  -3  260.17   13.70
  -2  -5  -3  253.77   14.70
  -2   5   3  253.27   14.90
  -2   5   3  253.07   15.10
  -2   5   3  247.18   13.10
   2   5   3  244.68   14.80
   2   5   3  241.38   11.90
  -2  -5   3  235.48   14.00
  -5  -2  -3  256.27   15.10
   5  -2   3  239.18   13.50
   5   2  -3  263.37   15.70
   5   2  -3  252.07   14.60
   5  -2   3  241.98   16.00
   5  -2   3  256.07   15.00
   2  -5  -3  249.68   15.10
  -5  -2  -3  244.98   14.30
  -2   5  -3  258.47   15.20
  -2  -5   3  234.48   14.40
  -5   2   3  278.57   17.90
  -5  -2  -3  247.08   14.90
  -5   2   3  259.77   16.10
   2   5   3  249.18   12.00
   5   2  -3  261.57   14.50
   2   5   3  262.27   14.90
  -2   5  -3  261.87   15.20
  -5   2   3  257.77   14.80
  -5   3  -3  505.15   26.60
   5   3   3  550.74   27.50
  -3   5   3  538.55   27.40
   5  -3  -3  515.65   25.20
  -5   3  -3  591.94   28.50
  -3   5   3  512.85   26.70
  -5  -3   3  496.05   26.60
   3   5  -3  538.15   26.20
   5  -3  -3  507.35   26.10
  -3  -5  -3  485.15   26.10
  -3   5   3  487.65   24.30
   5   3   3  496.35   25.40
  -5  -3   3  550.54   25.10
   5   3   3  525.15   26.40
   3   5  -3  490.05   26.30
   3  -5   3  488.25   26.70
   5  -3  -3  493.95   27.90
  -5  -3   3  510.55   26.10
  -3  -5  -3  534.05   26.50
   3  -5   3  505.15   26.30
  -5   3  -3  513.35   24.50
  -5  -3  -3  529.65   26.60
  -3  -5   3  490.75   26.00
  -3   5  -3  545.15   27.40
   5   3  -3  529.45   26.00
   3   5   3  505.55   23.00
   5  -3   3  521.55   24.40
   5  -3   3  493.15   27.70
  -5  -3  -3  478.75   26.50
   3  -5  -3  527.15   27.20
   3   5   3  518.65   22.90
  -3  -5   3  513.65   26.00
  -3   5  -3  544.05   26.90
  -5  -3  -3  509.15   25.10
  -5   3   3  521.65   26.40
  -5   3   3  577.84   28.40
   3   5   3  549.25   26.60
   5   3  -3  529.65   25.50
   5   3  -3  543.05   27.40
  -5   3   3  527.15   25.40
   3   5   3  528.45   26.90
   5  -3   3  516.25   26.50
   3  -5  -3  521.95   26.30
   4  -5   3   94.19    9.20
   5   4   3  110.29    7.90
   5  -4  -3  123.69   11.70
   4   5  -3  119.39    9.50
   5   4   3  110.49    9.50
   5   4   3  115.29   11.00
   5  -4  -3  114.79    9.60
  -5   4  -3  115.89   10.20
  -5  -4   3  106.89    9.60
  -4  -5  -3  116.19    9.80
   4  -5   3  117.79   10.90
  -4   5   3  110.59    7.60
  -5  -4   3  109.09    7.30
  -5   4  -3  114.19   11.10
  -4   5   3  112.59   10.90
  -5   4  -3   99.79    6.90
  -4  -5  -3  117.79    6.10
  -5  -4   3  113.69   10.00
   5  -4  -3  120.09    8.20
  -4   5   3  121.39   10.40
  -4  -5  -3  116.29   10.00
   4   5  -3  118.99   10.50
   5  -4   3  114.29    9.80
  -5   4   3  131.29   10.30
   4   5   3  143.29   11.20
   5  -4   3  119.89    7.00
  -5  -4  -3  104.99    9.70
  -5   4   3  127.99   11.30
   4  -5  -3  119.69    9.70
  -4   5  -3  116.89   10.40
   5   4  -3  109.79   10.70
  -5   4   3  124.39    8.30
   4   5   3  113.49    6.40
   5  -4   3  126.29   11.50
  -4  -5   3  111.99    9.50
   5   4  -3  121.79    9.60
   4  -5  -3  125.19   11.30
   5   4  -3  119.29    7.90
  -4  -5   3  106.49    9.50
   4   5   3  124.09    9.80
  -5  -4  -3  141.49   10.70
  -5  -4  -3  115.99    7.50
   4  -5  -3  123.19    7.60
  -4   5  -3  135.19   11.40
  -5   5   3   63.79    8.40
  -5   5  -3   77.59    9.30
   5  -5   3   62.69    9.30
   5   5  -3   63.99    7.80
   5  -5  -3   58.49    7.60
  -5  -5  -3   53.79    8.00
  -5   5   3   65.99    9.50
   5  -5   3   77.89    8.70
  -5  -5   3   60.39    4.10
   5   5   3   64.39    7.90
  -5  -5  -3   58.59    4.70
   5   5   3   51.69    8.40
  -5  -5  -3   56.79    8.00
   5  -5  -3   54.09    8.80
  -5  -5   3   47.10    4.00
   5   5  -3   61.99    9.20
   5  -5  -3   66.49    6.00
  -5  -5   3   43.10    6.90
   5  -5   3   68.59    3.80
  -5   5   3   57.49    5.90
  -5  -5   3   65.99    8.30
  -5   5  -3   63.19    9.50
  -5   5  -3   62.59    3.90
   5   5   3   58.89    5.20
  -6   0  -3  690.33   35.60
  -6   0   3  711.33   35.90
   0  -6   3  744.53   34.20
   0   6   3  723.63   34.90
   0  -6  -3  731.73   36.00
  -6   0   3  721.73   36.00
   6   0  -3  712.13   35.50
   6   0   3  771.62   36.40
   6   0   3  724.83   37.10
   0  -6  -3  760.52   34.60
   0  -6   3  761.92   33.80
   6   0  -3  701.63   36.90
   0   6  -3  733.33   34.30
   6   0  -3  714.43   36.10
   6   0   3  742.13   36.10
  -6   0  -3  737.23   36.30
   0   6   3  754.62   36.20
  -6   0   3  780.32   36.90
   0   6  -3  722.73   33.90
   0   6   3  754.02   34.70
   0   6  -3  774.62   36.30
   0   6  -3  743.83   36.00
  -6   0  -3  764.52   37.00
   0  -6  -3  766.32   34.60
  -1   6   3  324.47   16.10
  -6   1  -3  291.47   17.60
  -1  -6  -3  302.17   16.40
   1  -6   3  321.07   16.60
  -6   1  -3  302.07   16.80
  -6  -1   3  287.97   17.60
   1   6  -3  296.37   14.40
   1  -6   3  312.67   14.30
  -6   1  -3  339.87   19.10
   1   6  -3  296.17   16.10
  -1   6   3  321.77   17.70
  -1   6   3  302.47   15.70
   6   1   3  307.97   18.10
  -6  -1   3  302.37   17.40
   6  -1  -3  301.77   17.10
   1   6  -3  325.37   17.50
   6  -1  -3  291.77   18.80
   6  -1  -3  296.07   17.30
   6   1   3  312.37   17.70
   6   1   3  367.06   18.60
  -1   6   3  319.27   17.10
  -1   6   3  301.37   17.80
  -1  -6  -3  293.27   17.20
  -6  -1   3  346.77   18.00
   1   6   3  288.57   17.40
  -6  -1  -3  283.67   17.40
  -1  -6   3  288.87   17.30
  -1  -6   3  298.47   14.40
   6  -1   3  292.27   17.50
  -6  -1  -3  282.07   17.50
  -6   1   3  299.87   17.50
   6   1  -3  315.27   17.30
  -1   6  -3  314.47   17.80
   1   6   3  277.47   14.80
   1   6   3  295.37   15.00
  -6   1   3  278.07   16.90
   6   1  -3  288.17   17.90
  -1   6  -3  280.57   14.30
  -1  -6   3  301.97   15.90
   6  -1   3  281.57   18.50
  -1   6  -3  301.37   17.50
   6  -1   3  302.97   16.90
  -6  -1  -3  295.37   17.70
   6   1  -3  272.27   17.70
  -6   1   3  316.27   18.60
   1  -6  -3  295.17   16.70
  -1   6  -3  288.47   16.60
   6  -2  -3  348.97   21.60
  -6   2  -3  321.27   20.00
  -6   2  -3  340.57   18.60
   6  -2  -3  336.17   19.20
  -2   6   3  356.06   20.20
   2  -6   3  354.06   19.80
  -2   6   3  377.76   20.50
  -2   6   3  350.06   17.90
   6   2   3  347.67   20.00
   6   2   3  343.77   20.00
  -6  -2   3  354.96   20.00
   6   2   3  330.37   20.50
  -2   6   3  346.97   20.00
  -2  -6  -3  338.27   19.70
  -6   2  -3  399.36   21.90
  -6  -2   3  367.96   19.60
  -2   6   3  336.77   17.70
   2   6  -3  372.16   19.90
  -6  -2   3  321.77   20.00
   6  -2  -3  335.77   19.60
   2   6  -3  344.37   19.20
  -2  -6  -3  344.17   19.40
   6   2  -3  359.86   21.00
   2   6   3  372.56   20.10
   2   6   3  365.46   16.40
  -2  -6   3  357.66   18.90
   2  -6  -3  368.16   20.10
   2   6   3  380.46   20.10
   6  -2   3  341.87   21.40
  -6  -2  -3  386.76   19.90
  -2   6  -3  365.26   20.10
   6  -2   3  376.96   18.90
  -6   2   3  376.36   21.50
   2   6   3  351.26   16.20
  -2   6  -3  387.16   20.40
  -6   2   3  357.16   19.40
  -6   2   3  363.06   20.10
   6   2  -3  364.96   21.70
   6  -2   3  354.56   20.20
  -6  -2  -3  375.76   20.40
  -2   6  -3  375.66   20.60
  -6  -2  -3  369.26   20.40
   6   2  -3  389.96   19.90
  -2  -6   3  372.46   20.00
  -6   3  -3   96.89    9.80
   6  -3  -3   88.79   10.90
   3   6  -3  109.49    9.70
   6  -3  -3  110.29    8.80
  -3   6   3  103.19    7.00
   6   3   3  102.29   10.60
  -6   3  -3   93.39    7.60
  -3   6   3   98.99    9.70
   6   3   3  101.59    9.50
  -3   6   3  102.39   10.10
  -3  -6  -3   93.69    9.20
  -3   6   3  105.59    7.20
  -3   6   3  106.19   10.20
  -3  -6  -3  102.89    9.40
   3  -6   3  109.69   10.00
  -6  -3   3   93.99    9.50
  -6  -3   3   93.69    9.50
   3   6  -3  100.49    9.30
  -6  -3   3  108.89    8.40
   6   3   3   95.99    8.80
  -6   3  -3  101.59   10.80
   6  -3  -3   96.99    9.10
  -6  -3  -3   89.59    9.40
   6  -3   3   92.39    9.40
   6   3  -3  109.99    9.40
  -3   6  -3  104.69   10.20
   3   6   3  119.29   10.30
  -3  -6   3  103.39    8.90
   3  -6  -3  109.99   10.30
   6   3  -3  114.99   10.90
  -3  -6   3   99.29    9.40
  -3   6  -3  113.29   10.40
   6   3  -3   94.79    8.80
  -6   3   3  103.19   10.70
  -6  -3  -3  106.09    9.90
  -6   3   3  105.49    9.90
  -6   3   3   96.79    8.30
  -6  -3  -3  106.89    9.50
   6  -3   3   92.59    7.50
   6  -3   3   97.59   11.30
   3   6   3  102.79    9.40
   6  -4  -3  196.68   14.10
   6   4   3  226.58   16.00
  -4  -6  -3  199.78   14.40
   4  -6   3  189.18   15.80
   6   4   3  193.98   12.80
   6  -4  -3  202.28   12.80
  -6  -4   3  185.58   14.30
  -4   6   3  197.48   11.60
   4   6  -3  205.48   14.90
   6  -4  -3  191.88   16.10
   4   6  -3  221.38   14.40
  -4  -6  -3  220.28   14.90
  -4   6   3  205.08   11.70
  -6  -4   3  209.78   12.30
  -4   6   3  210.58   15.20
   6   4   3  199.28   15.90
  -4   6   3  223.38   15.80
  -6   4  -3  184.98   11.70
  -6   4  -3  197.18   14.90
   4  -6   3  197.98   15.20
  -6   4   3  234.18   15.10
  -4   6  -3  256.27   16.00
   4   6   3  268.47   16.20
   4   6   3  207.38   16.00
   6  -4   3  234.58   16.90
   4  -6  -3  220.18   15.80
  -6  -4  -3  215.88   12.50
   4  -6  -3  229.88   14.60
   6   4  -3  228.18   13.10
   6  -4   3  237.08   17.00
   6   4  -3  236.08   14.50
  -6  -4  -3  223.08   15.00
  -6   4   3  204.18   12.80
   6  -4   3  242.38   12.00
   6   4  -3  243.58   16.40
  -4   6  -3  249.08   16.50
  -4  -6   3  234.28   14.50
  -6  -4  -3  203.48   16.60
  -4  -6   3  210.68   14.50
  -6  -5   3  108.29    7.00
  -5   6   3  107.99   12.10
   6   5   3   95.09    7.80
  -6   5  -3  104.59   11.40
  -6  -5   3  104.39   10.60
  -6   5  -3  107.19   12.20
   5  -6   3  102.69   10.20
   6  -5  -3  109.49   12.70
  -6  -5   3   85.19    9.80
   5   6  -3  119.89   10.80
   5  -6   3   78.99   10.40
  -5  -6  -3  103.69   10.80
   5   6  -3  112.29   12.20
  -6  -5   3  110.79    7.10
  -6   5  -3   94.09    6.60
  -5   6   3  109.99   11.80
  -5   6   3  108.29    7.50
   6   5   3  112.59   12.60
   6   5   3  113.49   11.30
   6  -5  -3   95.99    9.90
  -5  -6  -3  106.39   10.80
   6  -5  -3  118.49    8.50
  -6   5   3  105.99   11.80
  -5  -6   3  108.39   10.40
  -6   5   3   83.89   10.00
   6   5  -3   79.79   10.50
   6  -5   3  107.19    6.60
  -6   5   3   84.69   11.20
  -5   6  -3  104.29   11.60
   6  -5   3  102.19   12.30
  -5   6  -3  127.19   13.40
   5  -6  -3   92.09   11.20
   5   6   3   87.79    9.90
  -5  -6   3  104.39   10.80
  -6  -5  -3  101.79    7.20
   6  -5   3  104.19   10.50
   5  -6  -3  101.99    7.40
   6   5  -3  104.39   10.40
  -6  -5  -3  104.39   11.40
  -6  -5  -3   90.99   10.10
   5  -6  -3  107.49   10.30
   5   6   3   93.99   10.90
   6   6   3   81.19   11.00
   6  -6   3   64.59   10.50
   6   6  -3   80.89    9.60
   6  -6  -3   91.29   12.80
   6  -6  -3  103.29    7.70
  -6   6  -3   79.39   13.50
  -6  -6  -3   96.49    5.30
  -6   6   3   83.49    7.30
   6   6   3   88.79    5.90
   6   6  -3   82.29   11.00
  -6  -6   3  116.19   11.60
  -6  -6   3   86.19   11.60
  -6   6   3  111.09   12.40
  -7   0  -3   33.00    6.90
   7   0  -3   46.50    6.80
   0  -7   3   39.10    5.00
   7   0   3   39.60    7.50
  -7   0  -3   37.40    7.00
   0   7  -3   36.50    6.50
   0   7   3   34.30    5.40
   0   7   3   39.70    5.30
   0   7   3   37.30    6.70
  -7   0   3   42.60    7.40
   0   7  -3   41.60    4.90
   0  -7  -3   37.80    5.10
   7   0  -3   39.50    7.10
   0   7  -3   23.40    5.80
  -7   0  -3   28.20    5.70
  -7   0   3   51.09    7.50
   0  -7   3   38.80    4.50
   7   0  -3   39.50    7.60
   7   0   3   30.90    6.10
  -7   0   3   22.70    5.40
   0   7   3   41.70    7.20
   7   0   3   50.69    7.30
   0   7  -3   37.90    4.90
   7  -1  -3   81.69    9.10
  -7   1  -3   81.69   10.20
   7  -1  -3   75.09   10.10
  -7  -1   3   75.29    8.90
  -7  -1   3   70.39    8.60
  -1   7   3   77.59    9.00
  -7   1  -3   80.79    8.30
   7   1   3   69.29    8.90
  -1   7   3   91.79   10.00
  -7   1  -3   64.69    8.60
  -1   7   3   70.09    6.80
  -1   7   3   81.29    7.10
   7   1   3   95.19   10.50
  -7  -1   3   87.19    9.50
  -1  -7  -3  100.49   10.00
  -1   7   3   72.39    7.80
   1   7  -3   76.59    7.40
   1  -7   3   76.69    7.60
  -1  -7  -3   74.79    7.50
   1   7  -3   79.09    8.80
   7  -1  -3   67.19    7.90
   1   7  -3   72.29    5.30
   7   1   3   81.49    9.20
  -7   1   3   86.69   10.60
  -7  -1  -3   66.49    8.40
   1   7   3   80.39    9.20
   1   7   3   76.19    6.00
  -1   7  -3   71.29    5.40
   7  -1   3   94.69    9.30
  -1  -7   3   67.49    8.60
   1   7   3   64.29    5.60
   7  -1   3   69.69    9.00
   7  -1   3   74.99   10.30
  -7   1   3   67.39    8.50
  -1   7  -3   62.49    8.10
  -7  -1  -3   60.59    8.20
  -7  -1  -3   81.89    9.20
  -1  -7   3   61.29    6.50
   7   1  -3   79.99    9.80
   7   1  -3   88.29    9.00
   1   7   3   72.09    7.90
  -1  -7   3   72.59    5.30
  -1   7  -3   79.69   11.20
   1  -7  -3   72.79    7.90
  -1   7  -3   70.69    8.90
  -7   1   3   81.49    9.00
   7   1  -3   65.69    9.00
  -2   7   3  688.93   31.70
   2   7  -3  667.33   33.20
  -7  -2   3  788.52   42.50
  -7  -2   3  664.83   34.10
  -7   2  -3  658.93   34.60
   2   7  -3  712.33   35.50
   7   2   3  619.24   33.90
  -7   2  -3  663.23   32.90
  -2   7   3  677.23   34.60
  -7  -2   3  687.83   33.90
  -2   7   3  688.93   34.10
  -2   7   3  622.54   31.30
  -2  -7  -3  640.14   33.80
   2  -7   3  647.04   33.40
   7  -2  -3  650.53   33.40
   7   2   3  721.83   34.90
  -2  -7  -3  638.64   33.10
   7  -2  -3  637.34   35.90
  -2   7   3  788.02   42.90
   7   2   3  720.73   35.50
   7  -2  -3  679.13   33.90
   7   2  -3  698.93   34.00
  -7   2   3  613.34   33.10
   2   7   3  698.53   34.00
  -2   7  -3  664.23   34.50
   7  -2   3  676.83   33.00
  -7   2   3  634.54   34.10
  -7  -2  -3  673.13   34.60
   7   2  -3  667.53   34.40
  -2   7  -3  667.63   34.00
  -7  -2  -3  696.13   34.00
  -2  -7   3  658.83   34.00
   7   2  -3  749.92   35.90
   2   7   3  671.63   29.40
  -2   7  -3  695.93   34.80
   2  -7  -3  698.03   34.10
  -2  -7   3  645.64   32.60
  -7  -2  -3  638.14   34.40
   7  -2   3  626.14   34.20
   7  -2   3  659.03   36.00
   2   7   3  703.13   34.40
   7  -3  -3  232.18   14.30
  -7   3  -3  226.88   16.00
  -3   7   3  226.98   16.00
  -7   3  -3  240.88   17.50
  -7   3  -3  224.18   13.60
   7   3   3  248.18   15.80
  -3  -7  -3  224.28   14.90
  -7  -3   3  226.78   15.70
  -3   7   3  213.08   11.90
  -3   7   3  237.18   12.30
   3   7  -3  240.38   15.40
  -3   7   3  246.48   16.40
   7  -3  -3  218.88   17.50
   7  -3  -3  210.28   16.30
  -7  -3   3  227.38   14.30
   7   3   3  224.38   16.70
  -7  -3   3  224.78   15.50
   7   3   3  203.78   14.60
  -3  -7  -3  235.18   15.50
   3  -7   3  211.68   15.30
   3   7  -3  227.38   15.30
  -3   7   3  231.18   15.70
   3   7   3  220.48   15.70
  -3  -7   3  210.18   15.20
   7  -3   3  226.58   13.50
   3   7   3  223.98   15.30
  -7  -3  -3  218.58   14.20
  -7  -3  -3  204.28   15.40
   3  -7  -3  227.18   15.90
  -3   7  -3  209.08   15.40
   7  -3   3  196.48   17.10
  -7   3   3  231.98   17.20
   7  -3   3  200.58   15.30
  -7   3   3  220.28   15.60
  -7   3   3  208.48   13.90
  -3   7  -3  203.58   15.70
  -3  -7   3  207.68   14.10
  -3   7  -3  205.48   15.60
  -7  -3  -3  213.18   15.50
   7   3  -3  215.88   16.50
   7   3  -3  200.98   14.60
   7  -4  -3  243.28   14.10
  -7   4  -3  236.38   17.90
  -4  -7  -3  231.88   15.70
   7   4   3  219.78   17.20
  -4  -7  -3  220.98   15.70
  -7  -4   3  240.08   13.70
  -7  -4   3  202.28   15.60
  -4   7   3  225.48   16.00
  -4   7   3  233.88   12.10
   7   4   3  242.88   16.10
  -4   7   3  240.08   16.80
   4   7  -3  245.98   16.50
   7  -4  -3  217.88   15.40
   4  -7   3  225.18   16.50
  -4   7   3  199.68   11.70
   4   7  -3  240.98   15.80
  -7  -4   3  211.48   15.70
  -7   4  -3  226.88   16.50
   7  -4  -3  194.28   17.40
  -4   7   3  223.28   16.90
  -4  -7   3  210.68   15.50
  -4  -7   3  195.28   14.60
   7   4  -3  224.98   15.40
  -4   7  -3  225.98   16.80
   4   7   3  221.58   16.50
  -7  -4  -3  204.68   15.50
   4  -7  -3  208.78   16.50
   7   4  -3  214.48   17.20
  -4   7  -3  228.38   16.80
  -7  -4  -3  212.28   15.80
  -7   4   3  182.98   16.40
   7  -4   3  218.68   17.80
   4   7   3  189.48   14.70
  -7   4   3  243.68   16.50
   7   4  -3  218.28   14.20
  -7   4   3  209.28   13.70
  -7  -4  -3  216.38   13.50
   7  -4   3  208.98   15.60
   7  -4   3  220.08   12.80
  -5   7   3  131.09   14.40
   5   7  -3  112.79   12.40
  -5  -7  -3  112.69   11.70
  -5   7   3  116.59    7.80
   7   5   3  113.79    9.20
   5  -7   3  104.69   12.10
  -5   7   3  108.29    7.40
  -7  -5   3   88.89   10.70
  -7   5  -3  125.19    8.10
  -7   5  -3  126.69   13.00
  -7  -5   3  102.09    8.00
   7  -5  -3  105.49    9.10
   7  -5  -3   94.79   16.50
  -5   7   3  141.59   15.20
   7   5   3   98.79   12.40
  -5  -7  -3  107.39   11.60
   5  -7  -3   78.89   11.30
  -5  -7   3   97.19   10.80
   7   5  -3  161.88   19.50
   7   5  -3   94.39    8.60
   5   7   3   96.19   11.60
  -5   7  -3  124.59   13.50
  -5  -7   3  122.29   12.40
  -7  -5  -3  106.79    8.20
   7  -5   3  105.39    7.80
  -7   5   3   95.49    8.80
  -7   5   3  121.19   12.70
  -5   7  -3  119.59   13.50
   7   5  -3  127.69   21.50
  -7  -5  -3  112.79   13.20
   6   7  -3  119.59   13.70
   6  -7   3  145.69   15.50
  -7  -6   3  162.08    8.00
  -6   7   3  165.58   15.10
   7   6   3  148.19    9.50
  -7   6  -3  149.29    8.20
  -7  -6   3  146.29   14.00
   7  -6  -3  133.59   15.30
   7  -6  -3  147.39   10.40
   7   6   3  130.79   14.70
  -7  -6   3  152.28    7.90
  -6   7   3  139.79    9.30
  -7   6  -3  156.98   15.00
  -6  -7  -3  130.49   13.70
  -7  -6  -3  154.78    8.80
   7   6  -3  132.99   14.90
  -6   7  -3  133.69   14.40
   6  -7  -3  148.59   15.90
   6   7   3  152.88   15.50
  -7   6   3  130.19   10.00
   7  -6   3  143.09   16.60
  -6  -7   3  169.68   14.70
   7  -6   3  162.88    8.10
  -7   6   3  158.48   14.60
  -7  -6  -3  139.49   14.60
   7  -7   3   79.69   12.70
   7  -7  -3  116.59    8.30
  -7   7  -3  105.09   13.40
  -7  -7  -3  120.39   13.60
   7   7  -3   89.89   13.40
   7   7   3   88.29   13.10
  -7   7   3   91.49    7.80
   7  -7  -3  116.99   15.00
  -7  -7   3   94.59   12.00
  -7   7   3  112.99   13.90
   0   8   3  216.18   16.30
   8   0   3  217.18   16.00
   0   8  -3  202.68   12.70
  -8   0  -3  229.08   16.30
   0  -8   3  217.68   12.40
   0  -8   3  239.38   13.10
   8   0  -3  233.68   16.60
   0   8   3  210.38   13.80
  -8   0   3  207.98   15.50
   8   0   3  228.68   16.00
   8   0  -3  210.48   17.30
   0   8  -3  263.57   16.80
   0   8  -3  221.18   13.10
   0   8  -3  200.98   15.40
  -8   0   3  204.18   19.80
   0   8   3  211.38   13.30
  -8   0  -3  228.18   16.90
   0   8   3  221.08   14.00
  -8   0   3  223.08   15.90
  -8   0  -3  226.88   15.60
   0   8   3  221.18   15.80
   8   0  -3  239.28   15.60
   8   0   3  212.08   17.10
  -1  -8  -3  137.39   12.20
  -8   1  -3  130.69   12.50
  -8  -1   3  114.39   11.90
   1   8  -3  117.39   11.60
   8   1   3  123.59   12.70
   8  -1  -3  123.79   11.30
   8  -1  -3  104.89   12.90
   8   1   3  120.29   13.30
  -8  -1   3  113.09   11.60
  -8   1  -3  103.39   10.80
   8  -1  -3  122.49   11.90
  -1   8   3  136.29   12.30
  -8  -1   3  116.49   11.90
   8   1   3  124.39   11.90
   1   8  -3  114.69    9.90
  -1   8   3  131.79   12.70
  -1   8   3  123.19   10.50
  -1  -8  -3  126.39   10.10
  -1   8   3  109.09    9.30
  -1   8   3  121.99    9.50
  -8   1  -3  131.19   14.00
   1   8  -3  123.19   12.30
   1   8  -3  116.79    7.40
  -1  -8   3  141.49    7.50
   8   1  -3  152.18   13.50
  -8   1   3  111.39   11.30
  -1   8  -3  123.89    7.80
  -8   1   3  149.79   12.90
  -8  -1  -3  128.29   12.60
   1   8   3  122.79    8.00
   1  -8  -3  132.69   10.60
   8   1  -3  144.69   12.00
   8  -1   3  137.99   11.80
  -1   8  -3  131.89   10.50
   8   1  -3  123.99   12.80
  -8   1   3  118.29   12.90
  -8  -1  -3  112.79   11.50
   1   8   3  127.69   10.80
   1   8   3  135.39   12.20
  -8  -1  -3  133.99   12.50
   8  -1   3  132.49   14.30
   1   8   3  128.99    8.30
  -1   8  -3  127.19    7.80
  -1   8  -3  141.49   12.30
  -1   8  -3  133.79   12.70
  -1  -8   3  132.59    9.50
   8  -1   3  141.59   12.30
   8   2   3  577.64   32.50
  -8   2  -3  580.64   32.70
   2   8  -3  598.74   31.10
   8  -2  -3  586.74   31.50
  -8   2  -3  615.74   34.40
  -8   2  -3  591.04   31.10
  -2   8   3  581.74   31.80
  -2   8   3  599.84   29.20
   8   2   3  612.64   33.50
   8  -2  -3  602.04   32.00
  -2   8   3  597.24   34.70
  -8  -2   3  533.25   32.20
  -2  -8  -3  555.94   31.90
   2  -8   3  581.14   31.10
   8  -2  -3  577.04   34.50
   2   8  -3  626.84   32.40
  -2   8   3  560.14   28.90
  -2   8   3  670.33   33.60
  -8  -2   3  626.74   32.30
  -8  -2   3  602.14   32.40
  -2  -8  -3  629.24   31.20
  -8   2   3  678.83   34.70
  -2   8  -3  638.04   32.10
  -8  -2  -3  592.74   32.60
   2  -8  -3  667.73   32.20
  -2  -8   3  623.54   30.50
   8   2  -3  629.24   32.20
   8  -2   3  656.73   31.50
  -2  -8   3  613.14   32.40
  -8  -2  -3  593.94   32.70
  -2   8  -3  675.43   33.60
  -8   2   3  604.84   31.60
  -8  -2  -3  657.63   32.60
   8   2  -3  585.74   32.70
   8   2  -3  634.84   33.90
   8  -2   3  611.04   34.80
   2   8   3  642.14   32.20
  -8   2   3  608.94   32.60
  -8   3  -3  823.72   39.50
  -3  -8  -3  812.62   43.90
   8  -3  -3  835.02   40.20
   3  -8   3  778.62   40.80
  -3   8   3  768.42   37.20
   8  -3  -3  787.92   41.90
   8   3   3  862.81   45.20
  -8  -3   3  792.22   41.20
  -3   8   3  918.71   47.90
  -3   8   3  855.91   42.20
   8   3   3  775.02   40.90
   3   8  -3  772.22   40.60
  -3   8   3  838.82   37.60
  -8  -3   3  882.41   40.70
   3  -8  -3  821.82   41.60
   3   8   3  874.91   41.80
  -8   3   3  767.32   39.80
  -3  -8   3  764.82   41.00
  -8  -3  -3  874.11   40.70
  -8   3   3  805.52   41.60
  -3   8  -3  825.62   41.90
   8   3  -3  779.62   40.90
   8   3  -3  838.42   41.30
   8  -3   3  805.42   39.40
  -3  -8   3  800.42   39.90
   4  -8   3  255.97   18.70
   4   8  -3  259.77   18.70
  -4   8   3  312.77   20.20
  -4   8   3  261.67   13.70
   8   4   3  288.87   20.90
  -8   4  -3  245.78   15.60
  -4  -8  -3  274.97   18.10
   8   4   3  261.67   17.30
  -4   8   3  271.77   14.00
  -4   8   3  294.57   20.00
   8  -4  -3  251.17   21.00
   8  -4  -3  291.07   16.90
  -8  -4   3  285.97   16.60
  -4  -8  -3  274.27   18.70
  -8   4  -3  295.07   20.00
  -8   4   3  256.57   16.40
  -8  -4  -3  253.57   20.50
   8   4  -3  233.88   17.00
  -4  -8   3  246.28   18.30
  -4   8  -3  282.57   19.80
  -8   4   3  262.57   19.30
  -4  -8   3  249.97   17.30
   4  -8  -3  263.17   19.30
   8  -4   3  270.67   15.80
   8   4  -3  294.97   21.10
   4   8   3  261.07   19.10
  -4   8  -3  270.77   19.60
   8  -4   3  258.27   21.20
  -8  -4  -3  283.77   16.70
  -8   5  -3  540.25   30.90
  -8   5  -3  510.85   26.40
   8  -5  -3  546.85   27.20
  -5   8   3  524.15   30.80
  -5   8   3  476.55   24.20
  -5   8   3  534.75   24.60
  -8  -5   3  549.85   26.50
   5  -8   3  523.35   30.70
   8  -5  -3  500.05   32.40
   5   8  -3  539.75   38.40
   8   5   3  498.15   27.30
   8   5   3  520.35   31.90
  -8  -5   3  550.44   30.20
  -5  -8  -3  499.15   29.70
   8   5  -3  547.35   32.20
  -5   8  -3  565.44   31.30
   5  -8  -3  556.24   32.10
  -8  -5  -3  550.34   30.60
  -8   5   3  557.44   30.80
   8  -5   3  505.85   32.70
   8  -5   3  556.24   26.00
  -8  -5  -3  538.45   26.50
   8   5  -3  524.45   27.20
  -8   5   3  477.55   26.80
  -5  -8   3  486.95   29.40
   5   8   3  567.74   31.40
  -8  -6   3  119.19    8.00
   8   6   3  131.69   15.90
  -6   8   3  116.89   14.50
   6   8  -3   99.19   12.90
  -6   8   3  102.09    6.90
   8  -6  -3  141.89   17.10
  -8  -6   3   97.59   12.20
  -6  -8  -3   90.79   11.80
   6  -8   3   96.09   12.90
  -8  -6   3  106.89    7.50
  -8   6  -3   96.59   13.40
  -8   6  -3  108.39    7.80
   8   6   3   98.29    8.90
   8  -6  -3  118.59    9.80
  -6   8   3  107.49    7.20
   8  -6   3  123.79   16.20
  -8  -6  -3  121.09    8.30
  -8   6   3  111.89    9.40
   8  -6   3  131.29    7.90
  -8   6   3  108.59   13.30
   6   8   3  101.79   13.80
   8   6  -3  109.29   14.00
  -6  -8   3  101.49   12.20
   6  -8  -3  121.89   14.70
  -8  -6  -3  103.49   12.60
  -6   8  -3   93.09   12.60
  -7   8   3   62.19   11.70
  -7  -8  -3   78.29   12.20
  -8  -7   3   67.39   10.90
   8   7   3   73.99   12.90
   7   8  -3   92.19   13.50
  -8   7  -3   60.29   11.30
   7  -8   3   61.29   11.90
   8  -7  -3   64.89   13.20
  -7   8   3   69.89    5.90
   8  -7  -3   73.79    7.50
  -7   8   3   63.49    5.50
  -7   8  -3   42.90   10.30
   8   7  -3   56.89   12.40
   8  -7   3   41.60   11.90
  -8  -7  -3   60.49   11.30
  -8   7   3   51.99   10.50
   7  -8  -3   49.80   11.40
  -7  -8   3   61.19   10.90
   7   8   3   55.09   12.40
  -8   7   3   55.59    6.60
   8  -8  -3   51.59   13.00
   8  -8   3   43.80   12.10
  -8   8   3   46.40    5.30
  -8  -8  -3   45.60   12.00
   8   8   3   53.59   12.40
  -8   8   3   51.99   11.50
   8   8  -3   44.20   11.40
  -8   8  -3   45.40   16.40
  -8  -8   3   48.20   10.70
  -8   8   3   53.39    5.20
  -9   0  -3   28.40    6.80
   0   9  -3   37.60    5.50
   0   9   3   28.10    8.40
   9   0   3   32.50    7.70
  -9   0   3   26.20    8.00
   9   0   3   23.10    8.50
   0  -9   3   31.80    5.20
   0   9   3   29.00    5.30
   0   9  -3   31.00    7.70
   0   9  -3   31.20    5.20
   9   0  -3   37.80    8.60
  -9   0   3   16.00    8.70
  -9   0  -3   40.30    8.80
   0   9   3   39.50    6.10
   0   9   3   27.10    6.00
   0   9   3   29.50    5.80
   9   0  -3   22.10    8.20
  -1   9   3   85.59    8.50
   9   1   3   88.59   11.90
  -9   1  -3   95.69   11.60
   9  -1  -3   92.79   11.00
  -1   9   3  101.59   10.00
  -1  -9  -3  102.09    9.30
   1   9  -3   89.89    5.90
  -9  -1   3   99.09   12.10
  -1   9   3  116.99   12.80
   9   1   3   87.29   12.50
  -1   9   3   89.39    8.60
   1   9  -3   93.69    9.40
  -9   1  -3   93.59   10.80
   1   9  -3   91.19   11.40
  -9  -1   3   89.99   11.50
   1  -9   3   93.19    9.40
   9  -1  -3   84.59   14.40
  -1   9  -3  108.39   12.40
   9   1  -3   84.49   11.30
  -1   9  -3   85.89    9.30
   9  -1   3   93.79   13.50
  -9   1   3   90.89   10.80
   1   9   3   83.29    6.90
  -9  -1  -3   98.79   12.30
  -1   9  -3   90.29    6.70
   9  -1   3   76.29   10.00
   9   1  -3  100.19   12.60
  -9   1   3  106.29   12.30
  -9  -1  -3   82.59   11.10
   1  -9  -3  103.39    9.90
  -1  -9   3   95.59    8.50
  -1   9  -3   80.99    6.60
   1   9   3   88.59    6.70
   1   9   3  100.09   10.40
  -2   9   3  265.17   17.90
   9   2   3  291.37   20.50
   9   2   3  242.28   19.20
  -2  -9  -3  243.58   18.50
  -9   2  -3  231.68   18.70
   9  -2  -3  255.87   17.90
  -2   9   3  255.67   14.70
  -2   9   3  272.07   19.80
   2   9  -3  269.97   17.30
   2  -9   3  275.67   17.50
  -2   9   3  239.28   14.50
   9  -2  -3  249.68   21.20
  -9  -2   3  283.97   18.90
  -2  -9  -3  263.87   16.80
  -9   2  -3  261.97   19.40
  -9  -2   3  273.17   19.20
  -2  -9   3  249.58   18.70
   9   2  -3  246.58   19.10
   2   9   3  273.67   18.20
   9   2  -3  282.57   20.50
  -2  -9   3  262.87   16.20
  -2   9  -3  273.37   19.60
  -9  -2  -3  255.57   19.10
   2  -9  -3  287.57   18.00
  -9   2   3  276.17   18.10
  -2   9  -3  250.67   17.50
  -9  -2  -3  261.97   18.60
   9  -2   3  263.27   21.30
  -9   2   3  245.58   18.70
   9  -2   3  304.27   18.10
  -3  -9  -3  107.89   12.60
   9  -3  -3  119.29   11.70
  -9   3  -3   93.09   11.90
   9   3   3   94.19   11.50
  -3   9   3   82.09   11.50
   9   3   3   87.99   12.10
  -9   3  -3   95.79   10.00
   9  -3  -3   97.19   14.40
  -3  -9  -3  105.19   11.00
  -9  -3   3  108.39   11.50
   3   9  -3   99.39   11.40
  -3   9   3   97.09    7.50
  -9  -3   3  100.89   12.40
  -3   9   3   93.59    7.10
   3  -9   3   85.29   10.80
  -3   9  -3   85.69   11.30
  -9   3   3   79.89    9.70
  -9  -3  -3  106.99   12.50
   9   3  -3   80.29   12.00
   9  -3   3  104.59   10.80
   3   9   3   95.99   11.40
  -9   3   3   73.19   11.00
   9  -3   3   99.09   14.00
  -3  -9   3   82.59   10.90
   3  -9  -3  130.09   13.10
  -9  -3  -3  111.79   11.50
  -3   9  -3  115.99   13.10
  -3  -9   3  104.49   10.40
   9   3  -3  107.49   12.00
  -9  -4   3   49.90    9.60
  -4   9   3   53.29    9.60
  -9  -4   3   58.89    8.20
  -9   4  -3   66.49    8.20
  -9   4  -3   55.99   10.70
   9  -4  -3   59.59   11.90
   9   4   3   51.39    8.90
   9   4   3   66.59   11.80
  -4   9   3   50.99    4.90
   4   9  -3   66.29   10.50
  -4  -9  -3   47.20    9.60
  -4   9   3   66.49   11.30
   4  -9   3   60.99    9.70
   9  -4  -3   52.59    8.00
  -4   9   3   48.70    4.60
  -9  -4  -3   51.79    7.90
  -4   9  -3   51.69   10.00
   4   9   3   54.09    9.80
  -4  -9   3   42.90    8.90
  -4  -9   3   63.79   10.20
   9   4  -3   62.09   12.10
   9  -4   3   58.19    7.70
  -9   4   3   48.50    9.50
  -4   9  -3   61.99   11.50
   9  -4   3   46.10   11.90
  -9   4   3   45.50    7.50
   9   4  -3   63.69    9.50
  -9  -4  -3   48.40   10.10
   4  -9  -3   65.59   10.90
  -5   9   3  170.78   17.40
   5  -9   3  152.58   15.80
  -9  -5   3  161.88   16.00
   9   5   3  143.59   13.00
   9  -5  -3  177.68   12.90
   5   9  -3  159.68   16.20
  -5  -9  -3  137.59   15.30
   9   5   3  159.48   17.30
  -9  -5   3  186.58   12.30
   9  -5  -3  117.59   16.20
  -9   5  -3  164.98   17.20
  -9   5  -3  162.78   11.60
  -9  -5  -3  163.98   12.00
   9  -5   3  147.19   18.30
  -9  -5  -3  131.99   14.80
  -5   9  -3  139.99   15.50
  -9   5   3  148.09   12.10
   9  -5   3  170.28   11.50
  -9   5   3  166.98   17.00
  -5  -9   3  172.98   16.20
   9   5  -3  145.69   12.90
   5   9   3  160.58   16.40
   9   5  -3  135.09   16.00
   5  -9  -3  159.28   16.50
  -9   6  -3   34.10   10.70
  -9   6  -3   33.50    6.30
  -9  -6   3   38.30    5.70
  -6   9   3   29.00    9.60
  -6  -9  -3   19.70    8.50
   9  -6  -3   21.50   10.50
   9  -6  -3   33.50    6.60
   9   6   3   19.80    9.20
  -9  -6   3   39.30    5.50
   6  -9   3   31.30    9.80
  -9  -6   3   25.40    9.40
   6   9  -3   32.30    9.80
  -6  -9   3   40.00    9.50
   9  -6   3   53.49   12.60
  -9  -6  -3   59.49   11.40
   6   9   3   28.30   10.20
  -9  -6  -3   43.20    5.80
  -9   6   3   35.30    6.20
  -6   9  -3   46.50   11.20
   9  -6   3   43.20    5.50
  -9   6   3   46.60   11.30
   6  -9  -3   36.40    9.90
   9   6  -3   45.30   12.20
  -9   7  -3   40.70   19.70
   7   9  -3   26.20   10.20
  -9  -7   3   36.00   10.10
   9  -7  -3   26.70   11.90
  -7  -9  -3   34.40   16.00
   9  -7  -3   42.20    6.20
  -7   9   3   31.10   11.30
   7  -9   3   41.20   11.60
   9   7  -3   34.60   12.60
  -7  -9   3   46.20   11.00
   7   9   3   35.00   10.80
  -7   9  -3   28.90   17.90
  -9   7   3   38.50    5.90
  -9   7   3   44.20   11.30
   7  -9  -3   48.20   12.00
   9  -7   3   30.50   11.40
   8   9  -3  157.38   18.90
   9   8   3  128.39   17.30
  -8   9   3  151.38   18.10
  -9  -8   3  166.58   18.30
  -8  -9  -3  109.49   15.10
   8  -9   3  145.49   18.80
  -9   8  -3  144.19   18.20
   9  -8  -3  117.69   17.40
   8   9   3  139.09   17.80
   9   8  -3  141.49   17.60
  -8  -9   3  115.99   15.40
   8  -9  -3  145.99   18.90
   9  -8   3  139.19   18.50
  -8   9  -3  195.98   20.20
  -9   8   3  142.69   17.30
  -9  -8  -3  173.28   18.60
  10   0   3   80.59   11.60
   0  10  -3   87.89    8.20
   0  10   3   79.99    8.50
   0  10  -3   82.69   11.90
 -10   0   3   86.99   11.80
  10   0  -3   86.69   12.90
 -10   0  -3   74.49   11.60
   0  10   3  100.69   10.20
  10   0   3   97.49   14.30
  10   0  -3   66.19   11.80
   0  10   3   96.99    9.80
   0 -10   3  101.29    8.20
   0  10   3   93.19   13.40
  -1  10   3   88.89    8.70
   1 -10   3   95.79    9.80
 -10   1  -3   72.19   11.00
  -1  10   3   96.09    9.20
   1  10  -3   87.89    9.50
 -10  -1   3   78.29   11.50
  10  -1  -3  103.29   12.80
   1  10  -3   98.09   13.40
  10  -1  -3   86.79   13.30
  -1  10   3   89.69   12.70
  10   1   3   80.69   12.60
  10   1   3   92.09   12.40
  -1  10   3  101.19   10.30
  -1  10  -3   93.09   12.70
  -1  10  -3   80.09    6.50
   1  10   3   83.29   10.10
  10   1  -3   67.49   11.80
 -10  -1  -3   90.89   12.20
  -1  10  -3   96.29   10.00
 -10   1   3   77.19   11.10
   1  10   3   91.19   12.70
  -1  10  -3   75.99    6.50
   1  10   3   83.29    6.30
   1  10   3   76.49    6.00
  10   1  -3   90.89   13.40
  10  -1   3   85.59   13.60
  -1 -10   3  102.29    8.90
  -2  10   3  269.67   20.90
  10  -2  -3  295.27   21.70
  10  -2  -3  233.78   22.00
   2  10  -3  254.97   20.40
 -10   2  -3  271.07   20.60
   2 -10   3  273.17   17.90
  -2  10   3  282.47   18.70
  -2 -10  -3  269.67   19.90
 -10   2  -3  250.27   18.00
  -2 -10  -3  252.87   16.90
 -10  -2   3  278.57   20.50
   2  10  -3  266.67   17.70
  10   2   3  247.28   20.60
  -2  10   3  253.57   14.80
  -2  10   3  246.48   16.50
  10   2   3  276.97   21.50
  10  -2   3  234.28   22.20
  10   2  -3  253.47   21.10
  10  -2   3  262.67   18.60
  -2  10  -3  271.27   18.20
  -2 -10   3  257.87   16.30
   2 -10  -3  257.67   18.00
 -10  -2  -3  251.17   20.30
  -2  10  -3  273.77   21.10
  10   2  -3  222.38   19.90
   2  10   3  255.67   18.40
 -10   2   3  247.78   19.80
  -3  10   3   42.20    4.70
 -10   3  -3   35.20    9.70
  10   3   3   35.70   10.10
 -10  -3   3   48.70   10.00
  10  -3  -3   50.99   11.70
  -3 -10  -3   43.60    9.90
  -3  10   3   32.40   10.00
 -10   3  -3   44.60    8.00
 -10  -3   3   56.09    9.20
  10  -3  -3   38.40    8.30
  -3  10   3   42.70    4.60
  -3  10   3   36.70    8.60
   3  10  -3   29.60    8.00
  10   3   3   31.50    8.90
   3 -10   3   48.90    9.00
  -3  10  -3   32.30    9.20
  10   3  -3   31.80    8.90
 -10   3   3   39.90   10.20
  -3  10  -3   37.00    8.30
  -3 -10   3   31.30    9.00
 -10  -3  -3   40.70    8.50
  10  -3   3   34.20   11.50
  10  -3   3   41.20    8.10
  10   3  -3   51.29   11.50
  -3 -10   3   31.70    6.90
   3 -10  -3   50.79    9.30
 -10  -3  -3   24.80    8.80
   4 -10   3   24.80   10.20
 -10  -4   3   25.20    9.00
  10   4   3   34.20   10.60
  -4 -10  -3   18.30    8.50
 -10   4  -3   27.40    6.80
  10   4   3   29.10    8.30
  10  -4  -3   25.90    7.50
   4  10  -3   24.50    8.40
  -4  10   3   29.10    9.70
 -10   4  -3   38.70   10.20
  10  -4  -3   27.50   10.60
  10  -4   3   35.60    7.10
  10  -4   3   31.30   11.20
  10   4  -3   18.90    9.80
 -10   4   3   20.40    8.90
  -4  10  -3   29.70   10.10
 -10   4   3   28.80    6.80
 -10  -4  -3   30.30    7.10
   4  10   3   39.80    9.30
   4 -10  -3   26.30    8.30
  10   4  -3   28.50    8.30
 -10  -4  -3   25.60    9.00
  -4 -10   3   25.60    8.80
  10   5   3  107.09   12.40
  -5 -10  -3  114.19   14.20
   5 -10   3  107.39   14.10
 -10  -5   3  157.38   16.60
 -10  -5   3  145.99   11.80
  10  -5  -3   99.59   16.00
  10   5   3  116.19   16.60
 -10   5  -3  141.79   16.60
 -10   5  -3  128.49   11.10
  -5  10   3  143.39   17.20
  10  -5  -3  146.99   12.60
   5  10  -3  127.99   15.30
  10  -5   3  125.89   18.30
  10  -5   3  127.99   11.10
 -10   5   3  106.99   11.40
  -5 -10   3  103.39   13.60
 -10  -5  -3  130.99   15.60
 -10  -5  -3  125.09   11.40
   5 -10  -3  113.99   15.00
 -10   5   3  102.69   14.20
  10   5  -3  117.99   12.90
   5  10   3  126.79   15.50
  10   5  -3  123.19   16.80
  -5  10  -3  107.39   15.30
  10   6   3  162.88   19.70
  10   6   3  142.79   12.70
 -10   6  -3  139.59   16.60
  -6  10   3  130.49   16.40
 -10  -6   3  122.29   16.90
  10  -6  -3  130.29   18.90
   6  10  -3  146.79   17.40
 -10  -6   3  137.19   10.50
  10  -6  -3  157.48   12.70
 -10   6  -3  139.59   11.60
   6 -10   3  136.19   16.40
 -10  -6   3  170.08   13.90
  -6 -10  -3  149.69   17.00
   6  10   3  141.09   17.30
  -6 -10   3  144.79   18.20
  10  -6   3  140.39   10.60
   6 -10  -3  134.79   16.90
 -10  -6  -3  125.29   16.70
  10  -6   3   93.09   16.40
 -10  -6  -3  153.18   10.90
 -10   6   3  133.79   11.60
  -6  10  -3  110.29   15.60
  10   6  -3  115.39   16.60
  -7  10   3    8.20   10.10
   7  10  -3    5.30   16.60
   7 -10   3    8.60   10.00
  10   7   3    3.30   10.40
 -10   7  -3    8.00   10.40
  10  -7  -3   22.50   12.80
  -7 -10  -3   13.00    9.50
 -10  -7   3    7.70    8.90
  10  -7  -3    7.90    5.20
  10   7  -3    8.30   10.50
   7  10   3   -7.40    8.00
  -7 -10   3    2.20    8.00
  10  -7   3    9.00   10.40
 -10   7   3   10.60   10.00
  -7  10  -3    2.40    9.90
 -10  -7  -3    6.80    9.10
   0  11   3   31.20    5.60
  11   0   3   42.00   10.20
  11   0   3   29.30   10.60
   0  11  -3   33.60    5.20
  11   0  -3   17.00    9.40
  11   0  -3   23.90    9.50
   0  11  -3   34.00   10.60
 -11   0   3   35.30    9.80
   0  11  -3   40.10    5.70
 -11   0  -3   23.40    9.00
   0  11   3   39.30    7.00
   0  11   3   29.20   10.80
   0  11  -3   30.20    6.00
   0  11   3   36.00    7.00
  -1  11   3  243.58   16.30
  11  -1  -3  249.78   20.10
  11   1   3  235.38   21.00
  -1  11   3  211.68   15.70
 -11   1  -3  253.17   20.50
   1  11  -3  258.47   21.10
   1 -11   3  252.77   15.40
  -1  11   3  238.98   14.50
 -11  -1   3  254.57   20.40
  11  -1  -3  250.67   22.90
  -1  11   3  238.28   15.00
   1  11  -3  231.58   15.70
  11   1   3  241.88   21.30
  -1  11   3  275.77   21.70
  -1  11  -3  209.58   11.50
  11   1  -3  201.98   20.50
   1  11   3  219.48   20.50
  -1  11  -3  225.08   15.40
  -1 -11   3  222.98   14.30
  -1  11  -3  197.68   11.50
  11  -1   3  227.48   19.40
   1  11   3  223.98   16.90
   1  11   3  216.58   16.20
 -11  -1  -3  230.58   20.10
  11   1  -3  242.68   21.40
 -11   1   3  229.68   19.70
  -1  11  -3  242.48   20.80
  11  -1   3  222.18   21.90
 -11  -2   3   34.50   10.60
 -11   2  -3   34.50   10.00
  11  -2  -3   41.20   12.00
   2  11  -3   56.39   11.90
  -2  11   3   37.70    5.60
  -2  11   3   40.00    6.50
   2 -11   3   45.70    8.30
  -2  11   3   40.90   11.70
   2  11  -3   37.80    8.10
  11  -2  -3   45.50   10.00
  11   2   3   38.80   10.90
  11   2   3   33.90   11.00
  11  -2   3   27.50   11.70
   2  11   3   40.30   11.20
 -11   2   3   42.70   10.70
  -2  11  -3   46.20   10.90
  -2 -11   3   52.09    7.40
  11   2  -3   36.80   10.90
   2 -11  -3   50.49    8.70
  -2  11  -3   39.00    8.00
   2  11   3   40.90    8.80
 -11  -2  -3   42.90   10.90
  11  -2   3   36.30    9.10
  11   2  -3   50.39   11.30
   3 -11   3    9.00    6.90
  11   3   3    6.70    7.70
 -11  -3   3   11.50    8.10
  11  -3  -3   26.00    8.10
  -3  11   3   16.20    2.60
  -3 -11  -3    6.10   13.40
  11   3   3   15.30   10.20
  -3  11   3   16.30    2.60
  11  -3  -3   22.90   10.60
  -3  11  -3   19.40    7.30
  11   3  -3    7.00    8.50
   3 -11  -3   17.50    7.50
   3  11   3   13.50    8.10
 -11   3   3    5.30    8.30
  11  -3   3   10.10    7.10
 -11  -3  -3   12.20   13.60
  11   3  -3   17.90   10.40
  11  -3   3   14.00   11.00
  -4 -11  -3   58.99   12.20
 -11   4  -3   62.19   12.50
 -11  -4   3   87.79   17.10
  -4  11   3   93.39   14.50
  11   4   3   96.09   14.90
   4  11  -3   86.79   12.70
  11  -4  -3   78.69   16.00
 -11   4  -3   91.69   10.50
  11  -4  -3   87.59   11.40
   4 -11   3   73.59   11.70
   4  11   3   85.59   12.90
  11   4  -3   78.59   14.00
  11  -4   3  101.59   11.00
 -11  -4  -3  106.29   14.30
  -4 -11   3   69.29   12.40
  11  -4   3   70.49   14.30
   4 -11  -3   85.09   12.40
  11   4  -3   79.49   12.20
  -4  11  -3   85.89   13.90
   5 -11   3  219.18   20.30
  11   5   3  201.28   17.90
   5  11  -3  264.67   21.50
 -11  -5   3  229.18   21.10
  -5 -11  -3  214.38   20.60
  -5  11   3  222.28   22.70
  11   5   3  239.88   23.90
 -11   5  -3  255.57   22.70
  11  -5  -3  224.58   24.40
 -11   5   3  216.78   21.30
  -5  11  -3  234.08   22.70
  11   5  -3  242.08   24.00
  -5 -11   3  231.38   20.80
  11   5  -3  236.68   18.50
   5  11   3  240.28   21.70
   5 -11  -3  211.98   20.30
  11  -5   3  260.67   16.50
  11  -5   3  228.08   25.20
 -11  -5  -3  232.88   21.60
 -12   0  -3   86.29   13.90
   0  12   3  101.39   10.60
  12   0   3  103.19   14.70
  12   0  -3   93.69   15.80
  12   0  -3  108.49   15.50
 -12   0   3   98.79   14.40
  12   0   3   72.19   14.60
   0  12  -3   86.19   14.00
   0  12   3   89.99    7.60
   0  12   3  133.59   17.30
   1  12  -3   12.40    9.90
  -1  12   3   18.90    6.00
 -12   1  -3   30.60   11.10
   1  12  -3   25.50    6.70
  12   1   3   14.50   11.20
 -12  -1   3   18.30    9.30
  12  -1  -3   25.40   10.00
   1 -12   3   26.60    6.10
  -1  12   3   40.20   11.60
  12   1   3   18.60   10.10
  -1  12   3   13.10    5.30
  12  -1  -3    9.80   11.70
 -12   1   3   18.40    9.10
 -12  -1  -3   15.60   10.00
  12   1  -3   15.80   10.10
   1  12   3   33.60   11.60
  -1  12  -3   13.80   10.90
  12  -1   3   10.70    8.90
   1  12   3   16.70    7.20
  12   1  -3   14.60   10.40
  12  -1   3   20.50   11.70
 -12   2  -3   11.60    9.40
   2  12  -3    8.60    6.40
  12  -2  -3   -1.10   10.00
 -12  -2   3    6.50    8.90
   2  12  -3   10.80    9.70
  -2  12   3    4.10    6.20
  12   2   3   10.80    9.10
  12  -2  -3    4.90    7.70
  12   2   3   -6.30    9.30
   2 -12   3    7.10    5.80
  -2  12   3   10.30   10.40
  12  -2   3    8.90    8.00
   2  12   3   -5.70    6.40
 -12   2   3    8.80    9.40
 -12  -2  -3    5.50    8.80
  12  -2   3    4.20   10.90
  -2  12  -3   17.90    9.80
   2  12   3    9.30    9.20
  12   2  -3   -7.00    9.10
  12   2  -3   20.00   10.00
   0   0   4 5803.12  249.58
   0   0  -4 5624.24  243.68
   0   0   4 5576.24  243.98
   0  -1   4  243.08   10.90
   1   0   4  226.18   11.40
   0  -1   4  227.98   10.60
   0  -1  -4  222.18   11.20
   1   0  -4  225.88   10.30
   0   1  -4  229.18   10.60
   0   1   4  232.78   10.60
   1   0   4  242.48   11.10
   1   0  -4  227.58   11.30
  -1   0   4  240.48   11.40
   0   1   4  235.68   11.20
   0  -1   4  224.68   11.10
   0   1  -4  231.08   11.20
   0   1   4  230.68   11.20
  -1   0  -4  234.78   11.10
   0  -1  -4  229.48   11.10
  -1   0  -4  240.68   11.40
   0  -1  -4  229.78   10.60
  -1   0   4  222.68   10.30
  -1   0  -4  231.58   10.80
   1   0   4  225.98   10.80
  -1   0   4  226.38   11.20
  -1   0   4  236.18   11.40
   0   1  -4  218.48   10.80
  -1   1   4  465.35   21.00
   1  -1   4  449.46   21.40
  -1  -1   4  457.45   20.80
   1   1   4  454.45   20.70
   1  -1  -4  459.05   21.40
  -1   1  -4  456.15   20.70
  -1  -1   4  452.45   21.10
   1  -1  -4  455.35   20.40
   1  -1   4  441.16   20.70
   1  -1   4  468.05   20.40
  -1   1   4  449.76   20.40
   1   1  -4  453.45   21.10
  -1  -1  -4  486.65   21.20
   1  -1   4  469.45   20.40
   1   1  -4  451.35   20.30
  -1  -1  -4  448.56   20.90
  -1  -1   4  462.65   20.30
  -1   1   4  453.25   21.40
   1   1   4  464.85   21.20
  -1  -1  -4  454.25   20.70
  -1   1  -4  475.35   21.50
   1   1   4  462.25   21.00
   1   1  -4  439.26   20.80
   0   2  -4   15.10    2.10
   2   0   4    8.30    2.20
   0   2  -4   13.50    2.00
   0   2   4   12.60    2.10
   0   2   4   12.60    2.10
   0   2   4   13.50    2.30
   0   2   4   14.30    2.30
   2   0  -4   15.10    1.90
   2   0   4   10.20    1.90
   0   2   4    9.10    1.70
  -2   0  -4   15.00    2.40
   2   0   4   14.70    2.30
   0   2  -4   15.80    2.10
  -2   0   4   13.10    1.80
  -2   0  -4   11.80    2.40
  -2   0   4    9.00    2.10
   0   2  -4   12.00    1.70
   2   0  -4   11.90    2.30
   0  -2   4   11.70    2.00
   2   0  -4   14.30    2.60
   0  -2  -4   14.40    2.20
   0  -2   4   12.30    1.60
  -2   0   4   14.10    2.70
  -2   0  -4   13.10    2.10
  -2   1  -4 1212.68   62.69
  -1   2   4 1234.78   61.49
   1   2  -4 1132.89   62.99
   2   1   4 1259.67   65.79
   2  -1  -4 1156.88   60.09
  -2   1  -4 1233.98   60.19
  -1  -2  -4 1167.48   61.09
  -1  -2  -4 1270.27   65.19
  -2  -1   4 1219.88   59.79
   1  -2   4 1211.58   56.29
   2   1   4 1251.07   62.69
   1   2  -4 1201.18   59.99
  -1   2   4 1197.18   62.49
   1  -2   4 1193.28   61.89
  -2  -1   4 1341.07   67.09
   2  -1  -4 1263.07   64.29
  -2  -1  -4 1252.07   62.49
  -1   2  -4 1300.27   56.49
   1  -2  -4 1278.17   62.69
  -1   2  -4 1277.67   62.59
   2  -1   4 1247.08   63.09
   1   2   4 1293.37   62.19
   1   2   4 1285.37   65.69
  -2   1   4 1164.58   63.99
  -1  -2   4 1208.88   60.29
  -2   1   4 1251.77   60.79
  -2  -1  -4 1167.08   64.69
   2  -1   4 1206.58   60.19
   2   1  -4 1173.58   65.69
  -1  -2   4 1271.47   63.29
   2   1  -4 1261.67   59.79
   2  -2  -4    5.00    1.70
   2  -2   4    9.00    1.30
  -2   2  -4    1.70    2.10
  -2  -2   4    5.10    1.60
  -2  -2  -4    5.30    2.20
  -2   2  -4    5.80    1.10
   2   2   4    7.50    2.50
   2  -2  -4    5.60    2.50
  -2   2  -4    5.60    2.10
  -2  -2  -4    7.70    2.50
   2  -2  -4    3.10    1.60
   2   2   4    4.20    1.80
  -2  -2   4    5.60    1.50
  -2   2   4    9.50    2.60
   2   2  -4    4.50    2.10
   2   2   4    3.00    1.90
  -2   2   4    4.10    1.80
  -2   2   4    7.30    1.90
   2   2  -4    5.20    1.80
  -2  -2  -4    3.90    1.60
   2  -2   4    1.90    1.80
  -2  -2   4    4.40    1.50
  -2  -2   4    6.70    2.10
   2  -2   4    2.70    2.00
   0   3   4  248.98   12.90
  -3   0  -4  273.27   13.90
   3   0   4  256.07   13.10
   0   3  -4  264.17   12.70
   0   3   4  241.78   12.80
   3   0  -4  241.28   12.60
   0  -3   4  255.67   12.60
  -3   0  -4  247.28   13.00
   0   3  -4  253.07   12.90
   3   0  -4  254.57   13.40
  -3   0   4  253.07   12.80
  -3   0   4  255.17   13.50
   3   0  -4  253.37   13.70
  -3   0   4  247.28   13.30
   3   0   4  251.37   13.70
  -3   0  -4  250.27   13.20
   0   3  -4  250.87   12.10
   0   3  -4  256.97   13.00
   0   3   4  267.67   13.10
   0  -3  -4  266.87   13.10
   0  -3   4  234.78   11.90
   3   0   4  244.68   13.20
   0   3   4  250.67   12.70
   1   3  -4 1242.98   55.09
  -3   1  -4 1249.57   56.39
  -3   1   4 1340.77   57.19
   3   1  -4 1229.18   56.39
  -3  -1  -4 1257.37   56.49
   3  -1   4 1244.98   56.39
  -2  -3  -4 1713.73   92.19
  -2  -3  -4 1708.13   87.99
   3   2   4 1809.02   93.99
  -3   2  -4 1725.53   82.79
   3  -2  -4 1815.02   89.19
   2   3  -4 1825.52   87.19
  -3   2  -4 1808.52   90.69
  -3  -2   4 1636.84   91.69
   2   3  -4 1767.92   92.09
   2  -3   4 1819.82   89.79
   3  -2  -4 1688.13   87.19
  -2   3   4 1780.42   89.19
  -2   3   4 1826.02   87.19
  -3  -2   4 1822.82   87.39
   3   2   4 1745.73   88.69
  -3  -2  -4 1733.43   88.99
  -3   2   4 1738.43   89.29
   3  -2   4 1649.54   82.39
   3   2  -4 1519.35   92.09
   3  -2   4 1685.23   89.99
   2   3   4 1887.61   93.59
  -3   2   4 1690.23   87.69
  -2   3  -4 1643.44   88.99
  -2  -3   4 1670.03   89.89
   3   2  -4 1754.02   86.09
   2  -3  -4 1711.63   85.69
  -3  -2  -4 1702.33   92.79
   2  -3  -4 1844.32   88.79
   2   3   4 1736.53   88.59
  -2  -3   4 1613.04   86.09
   3   3   4 3128.49  151.98
  -3  -3   4 3044.30  149.49
  -3   3   4 3030.10  149.39
  -3   3   4 3214.88  152.98
   3  -3  -4 3268.17  151.88
   3   3  -4 3234.28  149.79
   3   3  -4 2922.11  156.18
  -3   3  -4 3210.88  140.09
   3   3   4 3241.28  158.58
   3  -3   4 3235.08  139.79
  -3  -3  -4 3199.58  152.18
   3  -3  -4 3092.09  148.49
   3  -3   4 3145.09  153.28
  -3  -3   4 2953.30  155.08
  -3  -3  -4 3135.99  156.78
  -3   3  -4 3359.66  154.58
   0  -4   4   39.40    3.50
   0   4  -4   41.80    3.70
   0   4  -4   43.30    4.90
   4   0   4   62.09    6.00
  -4   0   4   39.60    4.70
   0   4  -4   42.00    4.80
  -4   0   4   48.70    5.70
   4   0  -4   43.80    5.40
   0   4  -4   44.10    4.40
   4   0   4   41.10    5.20
   4   0  -4   40.50    4.60
   0   4   4   38.70    4.50
   0   4   4   42.50    4.50
   4   0   4   35.90    5.00
   0   4   4   51.69    5.50
   0  -4  -4   52.59    5.50
  -4   0  -4   44.80    5.20
   4   0  -4   41.70    5.40
  -4   0  -4   42.80    5.00
  -4   0   4   37.00    4.80
  -4   0  -4   51.09    6.00
   0  -4   4   40.00    4.10
   4   1   4  241.38   13.10
   1   4  -4  231.78   11.10
   4  -1  -4  223.28   13.80
   4   1   4  259.47   13.40
  -1  -4  -4  240.28   12.60
   1  -4   4  240.98   10.40
   1   4  -4  212.68   12.00
   1   4  -4  240.88   12.60
  -1  -4  -4  253.37   12.90
   4  -1  -4  220.18   12.70
  -4  -1   4  234.18   12.60
  -1   4   4  234.78   12.00
  -4  -1   4  250.17   13.10
  -1   4   4  240.08   12.90
  -4   1  -4  229.78   13.00
  -1   4   4  235.08   13.00
   4   1   4  246.68   13.30
  -4  -1   4  235.68   13.20
  -1   4   4  223.88   14.00
  -4   1  -4  241.28   12.30
  -1   4   4  241.88   12.20
  -4   1  -4  247.88   14.00
   1  -4   4  237.28   12.60
   4  -1  -4  246.88   12.60
   4   1  -4  212.68   12.90
  -4   1   4  215.18   12.50
   4   1  -4  224.88   12.30
   1   4   4  213.68   11.40
  -1   4  -4  214.98   12.60
   4  -1   4  208.38   12.80
   1   4   4  221.28   11.60
  -4   1   4  215.88   13.60
   4  -1   4  208.88   13.50
  -1  -4   4  219.18   11.80
  -4   1   4  202.98   12.50
   1   4   4  246.88   13.00
  -1  -4   4  207.68   12.40
   1  -4  -4  228.18   12.80
  -1   4  -4  200.48   10.40
   1   4   4  218.38   12.60
  -4  -1  -4  212.98   12.90
  -1   4  -4  212.28   12.60
  -4  -1  -4  212.68   12.80
  -1  -4   4  216.68   11.00
   4   1  -4  218.88   13.10
   4  -1   4  216.18   12.20
   2   4  -4  270.67   13.70
  -4  -2   4  257.47   13.60
   2   4  -4  256.17   13.80
   4   2   4  259.57   14.00
  -4   2  -4  252.17   14.30
  -4   2  -4  258.47   15.10
   4   2   4  263.27   13.80
  -4  -2   4  239.48   14.10
   2  -4   4  248.48   13.80
  -2   4   4  262.37   14.00
   4  -2  -4  261.67   13.50
  -4  -2   4  277.37   13.50
  -2  -4  -4  245.68   14.90
   2  -4   4  254.57   14.20
  -2   4   4  272.57   13.00
   4   2   4  265.67   14.80
  -4   2  -4  265.87   12.80
  -2   4   4  268.17   14.10
  -2  -4  -4  255.17   14.00
  -2   4   4  260.37   14.50
   4  -2  -4  268.47   15.30
  -4   2   4  239.78   13.40
  -4  -2  -4  247.28   14.20
   4   2  -4  230.08   13.40
   4  -2   4  249.18   12.60
  -2  -4   4  222.38   13.30
   2  -4  -4  237.98   12.60
  -4  -2  -4  235.28   13.90
  -2  -4   4  242.78   11.40
  -2   4  -4  251.07   14.50
   4  -2   4  227.58   14.80
   2   4   4  224.78   13.60
   2   4   4  227.88   12.00
   2  -4  -4  246.18   14.40
   4   2  -4  222.58   14.20
  -2  -4   4  226.38   13.20
   4   2  -4  237.68   13.20
  -4  -2  -4  239.08   13.30
   4  -2   4  236.78   13.90
  -4   2   4  232.68   14.70
  -2  -4   4  237.88   11.40
   2   4   4  228.38   13.90
  -4   2   4  225.28   13.50
  -4  -3   4 1601.44   73.79
  -3  -4  -4 1656.03   71.39
   3  -4   4 1586.44   74.29
   3   4  -4 1672.13   74.09
  -4   3  -4 1650.83   73.79
  -4   3  -4 1621.74   71.49
   4  -3  -4 1635.04   73.29
   4   3   4 1685.23   74.39
   3  -4   4 1536.95   73.39
  -3  -4  -4 1599.74   73.39
  -3  -4  -4 1624.94   73.79
  -3   4   4 1632.84   72.29
  -4   3  -4 1661.83   74.99
   4  -3  -4 1610.54   74.89
  -3   4   4 1694.73   74.69
   3   4  -4 1697.63   73.19
   4   3   4 1666.43   73.59
  -4  -3   4 1727.53   72.19
   4   3   4 1638.64   72.59
  -4   3   4 1632.04   72.69
   3   4   4 1635.64   74.09
   4   3  -4 1548.45   73.99
   4  -3   4 1540.05   74.59
  -4  -3  -4 1649.63   72.29
  -3   4  -4 1606.44   73.79
   3  -4  -4 1704.93   74.79
   3  -4  -4 1593.94   73.29
   4   3  -4 1671.93   73.09
  -4   3   4 1684.63   74.99
   4   3  -4 1592.34   72.29
  -3   4  -4 1732.93   74.79
   3   4   4 1642.14   73.49
   4  -3   4 1597.04   73.69
  -3  -4   4 1590.44   73.09
  -3  -4   4 1654.33   70.89
  -3  -4   4 1689.13   70.89
  -3  -4   4 1633.84   73.39
  -4  -3  -4 1606.24   73.49
   3   4   4 1614.84   71.59
   3  -4  -4 1629.24   72.09
  -4  -3  -4 1606.24   73.99
  -4   4  -4   43.40    6.20
   4  -4  -4   35.50    5.30
  -4  -4   4   39.50    5.70
  -4   4  -4   48.30    3.20
   4   4   4   44.40    6.90
   4   4  -4   43.20    6.20
  -4  -4  -4   69.29    7.80
   4  -4  -4   51.29    5.20
  -4  -4   4   47.20    4.00
  -4  -4  -4   39.90    6.00
  -4   4   4   55.19    6.80
   4  -4   4   49.90    3.20
   4  -4   4   44.50    6.90
  -4   4   4   53.39    5.30
  -4   4   4   60.99    7.90
   4   4   4   42.70    4.60
   4  -4  -4   55.49    8.20
  -4  -4   4   50.59    4.00
  -4   4  -4   60.19    8.10
   4  -4   4   53.69    6.60
   4   4  -4   49.40    5.80
  -4  -4   4   46.30    6.10
  -4  -4  -4   49.30    4.40
   4   4   4   44.50    5.90
  -5   0   4  941.51   45.80
  -5   0  -4 1041.30   45.80
   0   5  -4  949.11   44.40
   5   0   4  988.80   44.60
   0  -5  -4  978.00   44.60
   5   0   4  921.11   44.70
   0   5   4  934.51   43.90
   0   5  -4  930.01   43.30
   5   0  -4 1001.10   45.10
   0   5   4  981.00   44.70
   0   5  -4  948.51   42.80
   0  -5   4  911.41   43.10
  -5   0  -4  954.90   44.80
   0   5   4  985.80   43.80
   5   0   4  921.11   45.30
   0  -5   4  952.60   42.70
  -5   0   4  882.31   44.50
  -5   0   4 1014.60   45.40
   0   5  -4  984.20   44.60
   5   0  -4  913.51   44.00
  -5   0  -4  941.81   44.40
   5   0  -4  977.00   46.30
   5   1   4  664.23   35.20
  -1  -5  -4  723.13   35.00
   5   1   4  759.62   35.50
  -5   1  -4  698.33   34.40
  -5  -1   4  716.83   35.40
   1  -5   4  751.52   34.60
  -5   1  -4  722.83   35.40
   1   5  -4  717.63   34.10
  -1   5   4  772.32   35.50
   1   5  -4  714.83   32.90
  -1   5   4  723.23   34.00
  -5  -1   4  759.92   36.80
   1  -5   4  721.53   32.30
  -1   5   4  730.63   34.10
   5  -1  -4  779.12   36.70
  -1   5   4  728.13   35.20
   5   1   4  695.93   35.40
  -5  -1   4  716.63   36.10
   5  -1  -4  717.43   34.70
  -5   1  -4  746.93   36.40
   1   5  -4  769.12   35.00
  -1   5   4  733.03   35.00
  -1  -5  -4  773.32   36.10
   5  -1   4  726.93   34.50
   1  -5  -4  744.43   34.90
   5  -1   4  734.63   35.40
  -5   1   4  763.92   35.30
  -5   1   4  807.52   36.50
  -5  -1  -4  763.42   35.60
   1   5   4  743.23   34.90
  -5  -1  -4  717.53   35.20
  -5  -1  -4  704.73   35.20
   1   5   4  739.83   35.10
   5   1  -4  726.33   35.60
  -1  -5   4  725.73   32.80
   5  -1   4  721.63   36.30
  -5   1   4  709.13   34.90
  -1  -5   4  732.93   33.90
  -1  -5   4  719.43   34.90
  -1   5  -4  706.53   32.40
   5   1  -4  784.82   35.90
  -1   5  -4  767.12   35.30
  -1   5  -4  749.82   34.80
   1   5   4  730.03   33.50
   5   1  -4  743.13   34.80
  -1   5  -4  740.73   35.30
   1   5   4  722.03   33.30
   5   2   4   61.59    7.30
  -2   5   4   73.99    5.80
   5   2   4   74.09    7.00
   2   5  -4   73.79    6.90
  -2   5   4   62.09    6.70
  -2   5   4   79.79    7.60
   5  -2  -4   73.59    6.80
  -5   2  -4   63.49    7.60
   5  -2  -4   73.99    6.80
  -2   5   4   68.09    5.60
  -5  -2   4   77.89    6.80
   5  -2  -4   58.09    7.60
  -5  -2   4   77.09    7.20
   5   2   4   71.29    7.20
   2  -5   4   71.69    7.50
  -5   2  -4   79.69    6.00
  -2  -5  -4   76.89    7.50
  -5   2  -4   67.99    7.50
  -5  -2   4   58.59    6.70
  -2   5   4   65.99    7.00
  -2  -5  -4   76.59    7.10
   2   5  -4   58.19    6.30
   2  -5  -4   56.99    6.70
  -2  -5   4   65.39    3.40
  -2  -5   4   58.49    6.30
   2   5   4   59.49    4.40
  -2  -5   4   64.19    6.20
  -5   2   4   68.29    6.90
  -5  -2  -4   64.89    6.60
   5   2  -4   50.19    6.90
   2   5   4   63.39    6.80
   5  -2   4   66.49    5.80
   2   5   4   54.29    6.50
   5   2  -4   51.89    5.90
   5  -2   4   48.00    7.00
   2   5   4   56.09    4.60
  -5   2   4   64.29    7.80
  -5  -2  -4   56.39    6.90
   5  -2   4   73.99    7.80
  -5   2   4   63.39    6.70
  -2   5  -4   70.99    7.80
   5   2  -4   59.89    6.70
  -2  -5   4   60.69    3.30
  -2   5  -4   78.39    7.60
  -5  -2  -4   46.30    6.20
   3  -5   4  352.86   19.00
  -5   3  -4  350.06   19.30
   5  -3  -4  333.07   20.50
   3  -5   4  334.07   19.50
  -3   5   4  339.67   19.10
   5  -3  -4  337.57   17.90
  -5  -3   4  314.77   18.30
   5  -3  -4  337.77   18.60
   3   5  -4  356.16   19.30
  -5   3  -4  341.67   17.00
  -3  -5  -4  331.37   19.00
  -3   5   4  348.07   19.90
  -3  -5  -4  313.57   18.50
   5   3   4  363.86   20.10
  -5  -3   4  340.47   19.30
  -5  -3   4  374.06   17.80
   5   3   4  351.46   19.00
  -5   3  -4  376.56   20.90
  -3   5   4  312.27   17.00
   3   5  -4  356.76   18.60
   5   3   4  329.47   18.00
   5  -3   4  365.46   19.30
  -3  -5   4  313.17   18.40
   5  -3   4  337.87   20.40
   3   5   4  319.27   19.20
   3  -5  -4  355.46   17.10
   5   3  -4  346.47   18.00
  -3   5  -4  346.67   19.30
   3   5   4  366.76   19.10
  -3  -5   4  320.67   18.30
  -5  -3  -4  335.57   19.40
   3   5   4  342.07   16.00
   3  -5  -4  348.37   19.90
   5  -3   4  339.97   16.80
  -5   3   4  337.17   18.80
   5   3  -4  350.56   18.40
  -5   3   4  365.76   20.70
  -5  -3  -4  353.16   17.90
  -5  -3  -4  321.87   18.80
   3   5   4  320.27   16.00
  -3   5  -4  378.26   20.30
   5   3  -4  349.87   20.00
  -5   4  -4   10.40    5.60
  -5   4  -4   10.40    4.60
   4  -5   4   11.30    4.40
  -4   5   4    7.90    4.70
  -4  -5  -4    3.80    3.90
  -5  -4   4    7.20    4.30
   5  -4  -4    7.70    5.20
  -4  -5  -4    4.40    3.90
   4  -5   4    8.30    4.60
   4   5  -4   14.90    5.10
  -5  -4   4    6.10    4.00
   5   4   4    5.50    3.00
  -5   4  -4    6.70    2.20
  -5  -4   4    6.90    2.60
   5   4   4    3.60    4.40
   4   5  -4   16.00    4.50
  -4   5   4    6.00    4.60
   5  -4  -4    9.20    4.40
  -4   5   4    8.70    3.10
   5  -4  -4    7.00    3.20
  -4  -5  -4   14.10    2.30
   5   4   4    0.90    3.50
   5   4  -4    4.30    4.80
  -4  -5   4   11.60    4.20
  -5   4   4    6.10    4.70
  -5  -4  -4   10.00    2.90
   4   5   4    9.70    2.30
   5  -4   4    4.00    4.50
   5   4  -4    7.10    3.90
  -5  -4  -4    5.00    4.10
   4   5   4    9.90    4.80
   4  -5  -4    8.40    2.90
  -5   4   4    7.80    3.30
  -4   5  -4   11.40    4.80
  -5   4   4    6.80    4.10
   5  -4   4    8.60    2.30
  -5  -4  -4   10.20    4.30
  -4  -5   4   13.10    4.60
   4   5   4    9.50    4.50
  -4   5  -4   11.90    5.10
   5  -4   4    7.10    4.10
   4  -5  -4    8.70    5.40
   4  -5  -4    9.10    3.90
  -5   5  -4  149.99   12.20
   5   5   4  150.28   13.00
  -5  -5   4  140.19   11.60
  -5   5  -4  144.99   13.20
  -5  -5  -4  128.89   11.70
   5   5   4  130.99    8.60
  -5   5   4  147.79   12.10
  -5   5   4  139.89   13.10
  -5  -5  -4  128.09   11.30
   5  -5  -4  135.39    9.30
   5   5  -4  154.18   11.30
   5  -5   4  141.39   13.10
  -5  -5   4  137.79    7.50
   5  -5  -4  128.89   10.90
  -5  -5   4  149.49   11.60
   5  -5  -4  140.79   13.20
   5   5  -4  139.89   12.60
  -5  -5   4  146.29    7.60
  -5  -5  -4  142.79    8.20
  -5   5   4  143.99    9.50
   0   6   4   77.29    8.20
   0   6   4   71.19    7.10
  -6   0   4   65.69    8.10
   0   6  -4   66.69    7.60
   0  -6  -4   50.69    6.70
   6   0  -4   64.09    8.80
  -6   0   4   63.39    7.70
   0  -6   4   65.79    5.40
  -6   0   4   60.19    7.40
   6   0   4   81.09    9.30
   0   6  -4   58.39    5.50
   0   6  -4   58.59    7.20
   6   0   4   64.69    7.30
  -6   0  -4   65.09    7.80
   6   0  -4   58.79    7.20
   6   0  -4   74.59    7.50
  -6   0  -4   96.99   10.20
  -6   0  -4   67.59    7.60
   0   6   4   66.79    6.40
   0   6  -4   67.69    6.20
   0  -6   4   65.59    5.80
   6   0   4   69.59    7.90
   6   1   4  610.44   30.00
   6   1   4  596.34   29.70
   1   6  -4  581.14   28.00
  -6  -1   4  582.14   29.20
   6  -1  -4  578.34   28.90
   1  -6   4  569.44   28.30
  -6   1  -4  552.94   29.50
   1   6  -4  582.24   29.10
  -1  -6  -4  595.64   28.60
   6  -1  -4  553.64   29.10
  -1   6   4  584.14   27.90
  -6   1  -4  576.34   28.70
  -6  -1   4  624.64   29.90
   1  -6   4  594.34   26.00
  -1   6   4  578.74   28.00
  -6  -1   4  597.94   29.90
  -1   6   4  602.64   29.60
  -1  -6  -4  584.94   29.30
   1   6  -4  562.74   26.50
  -1   6   4  605.94   29.90
  -1   6   4  630.64   30.70
  -6   1  -4  578.74   30.70
   6  -1  -4  566.04   30.80
   6   1   4  543.85   29.70
   1   6   4  627.24   29.70
  -6   1   4  582.04   30.50
  -1   6  -4  618.94   29.90
   1  -6  -4  595.54   28.80
  -1  -6   4  581.14   27.70
   1   6   4  559.54   27.00
  -1  -6   4  558.74   29.10
   1   6   4  588.44   27.30
  -6  -1  -4  561.24   29.30
  -6   1   4  528.45   28.90
  -6  -1  -4  587.14   29.80
  -1   6  -4  580.54   28.70
  -1   6  -4  600.84   29.50
   6   1  -4  571.84   28.90
   6  -1   4  580.64   28.80
   6   1  -4  569.04   29.90
   6  -1   4  553.94   30.60
  -6   1   4  570.14   29.20
   6   1  -4  550.74   29.80
  -1  -6   4  590.64   26.50
  -1   6  -4  547.75   26.10
  -6  -1  -4  576.24   29.60
   6  -1   4  584.34   29.60
   1   6   4  605.64   29.10
  -6  -2   4  302.57   18.30
  -2  -6  -4  330.37   17.70
  -2   6   4  329.97   18.60
   6  -2  -4  307.77   17.60
   2   6  -4  295.37   17.30
   6   2   4  307.57   18.00
   2  -6   4  309.47   17.70
   6   2   4  311.77   18.80
  -2   6   4  306.47   16.10
   2   6  -4  331.57   17.90
  -2   6   4  314.27   18.20
  -6  -2   4  338.47   17.80
   6  -2  -4  306.67   19.80
  -6   2  -4  325.87   19.70
  -6   2  -4  296.47   16.70
  -6   2  -4  311.57   18.50
  -2   6   4  312.67   16.20
   6   2   4  317.97   18.10
  -2  -6  -4  307.47   17.80
  -6  -2   4  319.87   18.00
   6  -2  -4  312.57   17.50
  -2   6   4  322.57   18.40
  -2   6  -4  298.87   18.00
  -6   2   4  308.47   18.00
  -2   6  -4  309.37   18.10
   6  -2   4  293.87   18.10
  -2   6  -4  287.37   18.20
   6  -2   4  305.97   16.70
  -2  -6   4  313.67   16.90
  -6   2   4  298.27   17.30
  -6   2   4  327.97   19.60
   6  -2   4  288.17   19.40
   2   6   4  320.37   18.10
   2   6   4  316.57   18.00
   6   2  -4  300.87   19.50
   6   2  -4  340.47   19.20
  -2  -6   4  284.77   17.50
   6   2  -4  303.87   17.50
  -6  -2  -4  297.27   18.10
   2   6   4  301.17   14.90
  -6  -2  -4  311.97   17.80
   2  -6  -4  328.07   18.30
   2   6   4  295.97   14.70
  -6  -2  -4  310.97   18.30
  -3  -6  -4  149.59   11.30
  -3   6   4  141.99   11.50
  -6  -3   4  154.28   11.40
   3   6  -4  147.49   11.20
   3  -6   4  140.79   11.10
  -6   3  -4  147.29    9.50
  -6  -3   4  146.99   11.60
   6   3   4  163.38   12.70
  -3  -6  -4  151.28   11.40
   6  -3  -4  138.29   10.90
  -6   3  -4  151.18   12.90
  -3   6   4  141.09    9.00
  -6  -3   4  151.58   11.60
  -6   3  -4  136.89   11.60
   6  -3  -4  141.59   13.10
   6  -3  -4  144.69   10.40
   6   3   4  142.39   10.70
   6   3   4  135.69   11.30
   3  -6   4  133.29   11.40
  -3   6   4  147.29   12.20
  -3   6   4  158.68    9.40
  -3   6   4  147.69   11.90
   3   6  -4  144.09   11.50
  -6  -3  -4  140.89   11.50
  -3   6  -4  148.59   12.00
  -6  -3  -4  153.68   10.40
   6  -3   4  134.49    9.30
   3  -6  -4  128.39   11.80
  -6  -3  -4  151.08   11.90
  -6   3   4  140.69   11.50
  -6   3   4  141.69   10.30
   6   3  -4  137.59   10.80
  -3  -6   4  139.49   10.50
  -3  -6   4  141.19   11.10
   6  -3   4  138.09   12.90
   3   6   4  142.49    7.00
   3   6   4  155.28   11.80
   6   3  -4  135.99   12.40
  -6   3   4  135.29   12.40
   6  -3   4  146.89   11.60
  -3   6  -4  140.29   12.00
   6   3  -4  157.78   11.00
   3   6   4  145.99   11.40
  -6  -4   4  244.88   15.90
   4   6  -4  237.58   16.40
  -6   4  -4  254.37   18.20
   6   4   4  260.57   17.40
   6  -4  -4  216.78   15.50
  -4  -6  -4  233.68   15.80
  -4   6   4  218.98   13.20
   6   4   4  250.17   15.90
  -4   6   4  232.08   16.30
  -4   6   4  232.98   17.00
   4   6  -4  244.38   15.60
  -6  -4   4  248.88   13.80
  -4  -6  -4  241.18   16.10
  -6   4  -4  250.97   16.60
   6  -4  -4  230.58   17.70
  -6   4  -4  244.28   13.20
   4  -6   4  233.38   15.80
   6  -4  -4  227.08   15.40
   6   4   4  231.58   14.30
  -6  -4   4  238.08   17.50
   4  -6   4  238.28   16.70
   6  -4   4  266.97   18.20
   6  -4   4  259.67   16.40
   6   4  -4  265.37   15.70
  -6   4   4  244.88   14.40
   6   4  -4  246.28   14.40
  -4  -6   4  241.78   15.70
  -6   4   4  262.77   16.40
  -6  -4  -4  241.98   16.20
   4   6   4  277.07   17.30
   6  -4   4  266.57   13.20
   4   6   4  268.77   16.30
  -4   6  -4  225.58   17.00
  -6   4   4  261.77   18.00
   6   4  -4  282.77   17.90
  -6  -4  -4  252.97   14.00
  -4   6  -4  268.27   17.10
  -6  -4  -4  233.08   16.30
   4  -6  -4  241.38   17.20
  -4  -6   4  239.58   15.50
  -5  -6  -4  440.66   24.40
  -6  -5   4  418.46   24.10
  -6   5  -4  482.55   26.80
   6  -5  -4  399.26   23.30
  -6   5  -4  423.86   24.40
  -5   6   4  419.16   25.50
  -5   6   4  403.66   20.90
   5   6  -4  453.75   25.20
  -5  -6  -4  429.96   24.00
   6  -5  -4  460.05   21.90
   6   5   4  418.76   21.20
  -6  -5   4  461.95   20.50
   6  -5  -4  401.56   25.80
   6   5   4  468.55   25.70
   6   5   4  441.26   24.10
   5  -6   4  423.86   25.30
  -6  -5   4  434.16   20.30
  -6   5  -4  418.56   19.80
   5   6  -4  468.55   24.00
  -6  -5   4  434.96   23.90
  -5   6   4  430.76   24.50
   5  -6   4  396.26   23.60
  -6  -5  -4  384.96   23.70
   5  -6  -4  377.16   25.20
   6   5  -4  414.56   25.20
  -6  -5  -4  408.16   20.60
   5   6   4  409.76   25.00
  -6   5   4  378.46   21.30
  -5   6  -4  446.26   26.00
   5   6   4  403.36   19.10
  -6   5   4  420.46   24.20
   6   5  -4  433.96   23.60
  -5   6  -4  456.25   24.90
   5   6   4  398.56   23.70
  -5  -6   4  389.26   23.50
   6  -5   4  427.86   19.60
  -6  -5  -4  396.86   24.00
   6  -5   4  403.46   25.60
   5  -6  -4  390.76   23.30
   6  -5   4  377.96   23.60
  -5  -6   4  386.06   23.50
   5  -6  -4  444.06   21.00
  -6   5   4  438.86   26.00
  -6  -6   4 1341.57   66.39
  -6   6   4 1425.16   67.49
  -6  -6  -4 1486.85   62.19
   6  -6   4 1398.96   68.89
   6  -6  -4 1515.05   63.99
   6   6   4 1399.36   68.79
  -6  -6  -4 1300.57   69.09
   6   6  -4 1442.96   68.39
   6   6  -4 1474.05   66.69
   6   6   4 1356.66   62.49
   6  -6  -4 1349.27   68.89
  -6   6  -4 1512.05   73.79
   0   7  -4   19.00    3.70
   0   7   4   19.40    4.60
   0   7   4   18.20    4.60
  -7   0  -4   19.30    5.00
   7   0   4   19.50    5.30
   0   7   4   22.10    4.40
  -7   0   4   18.50    5.30
   7   0  -4    8.70    5.10
  -7   0   4   10.90    4.90
   7   0   4   22.00    6.10
  -7   0   4   20.10    5.40
   7   0  -4   15.50    5.90
   0   7  -4   17.50    5.40
   0  -7   4   18.70    3.90
   0   7  -4   18.50    4.00
   0   7  -4   20.30    5.30
   0   7   4   29.80    6.20
  -7   0  -4   16.40    6.00
   7   0  -4   17.50    5.00
   7   0   4   15.60    6.10
  -7   0  -4   10.40    4.90
   0  -7   4   19.00    3.30
   1  -7   4   73.49    7.60
  -7  -1   4   74.19    8.70
  -1   7   4   72.89    7.30
  -7   1  -4   86.79    9.90
   1   7  -4   81.09    5.60
  -7   1  -4   80.19    9.60
   1   7  -4   73.09    7.40
   1   7  -4  102.59    9.90
   7   1   4   69.89    9.20
  -1  -7  -4   80.39    7.70
  -7  -1   4   78.89    8.70
  -7   1  -4   77.19    8.20
  -1   7   4   93.39   10.00
   1  -7   4   83.99    5.10
  -1   7   4   89.99    8.50
   7  -1  -4   93.99    8.90
  -1   7   4   81.19    9.10
  -1  -7  -4   97.89    9.80
   7  -1  -4   78.99   10.50
  -7  -1   4   60.99    8.10
   7  -1  -4   89.79    9.50
   7   1   4   86.79   10.00
   1   7   4   85.49   11.00
   1   7   4   84.69    8.70
   1   7   4   67.39    6.20
  -1   7  -4   62.69    5.10
  -7   1   4   75.09    8.70
   1  -7  -4   68.69    8.80
   7   1  -4   60.89    8.50
  -1   7  -4   66.89    8.30
   7  -1   4   53.79    8.70
   7   1  -4   81.49   10.00
  -1  -7   4   68.19    5.40
  -1   7  -4   67.99    8.60
  -7   1   4   59.49    8.80
  -7  -1  -4   59.39    8.30
  -7  -1  -4   71.09    8.60
   1   7   4   63.29    5.90
  -1   7  -4   68.09    7.60
  -7   1   4   73.39    8.60
  -7  -1  -4   58.59    8.20
   7   1  -4   82.99    8.90
  -1  -7   4   67.19    6.70
   7  -1   4   68.59    7.90
   7  -2  -4   43.00    8.90
  -2   7   4   55.79    8.00
   7   2   4   49.50    7.40
   2  -7   4   48.20    6.90
   7   2   4   48.50    8.40
   7  -2  -4   39.10    6.60
   7   2   4   46.60    7.50
  -2  -7  -4   44.00    6.40
  -7   2  -4   42.20    8.20
   2   7  -4   53.09    7.90
  -7   2  -4   45.00    6.30
  -2   7   4   49.90    5.60
   7  -2  -4   44.30    6.70
  -7  -2   4   36.40    6.80
  -2   7   4   55.49    5.90
  -2   7   4   59.19   13.40
   2   7  -4   43.40    6.50
  -7  -2   4   42.60    7.20
  -2   7   4   55.49    8.20
  -2  -7  -4   44.70    7.50
  -7   2  -4   41.90    7.30
  -7  -2   4   56.79    7.40
  -7   2   4   43.70    6.60
  -2   7  -4   62.79    8.80
   7   2  -4   49.50    7.80
  -7   2   4   41.30    9.00
   7  -2   4   39.70    6.10
   2  -7  -4   54.29    7.70
   2   7   4   46.90    7.10
  -2  -7   4   41.10    5.90
  -7   2   4   37.80    6.90
   2   7   4   49.99    7.40
  -7  -2  -4   53.79    8.30
  -2   7  -4   32.30    6.60
   7   2  -4   64.09    8.00
  -7  -2  -4   54.49    7.80
   7  -2   4   51.59    9.00
  -7  -2  -4   53.99    9.20
   7  -2   4   49.00    8.00
   2   7   4   40.80    3.70
  -2   7  -4   60.69    7.90
  -2  -7   4   36.50    6.60
   2   7   4   45.00    4.00
   7   2  -4   35.80    7.30
  -3  -7  -4  879.31   43.40
   7   3   4  940.51   45.00
   7   3   4  867.31   43.00
  -7  -3   4  898.91   43.50
   3   7  -4  902.51   43.30
   7  -3  -4  904.71   42.50
  -3   7   4  852.51   43.70
  -7   3  -4  885.41   44.10
  -7  -3   4  890.51   44.10
  -3   7   4  931.01   44.50
  -7   3  -4  929.31   45.90
  -3   7   4  874.01   40.60
   3   7  -4  901.01   43.40
   3  -7   4  887.11   43.60
   7   3   4  922.41   43.90
  -3   7   4  917.11   44.40
  -3   7   4  896.51   40.90
   7  -3  -4  851.11   45.70
  -7   3  -4  892.61   41.70
  -7  -3   4  916.71   42.50
  -3  -7  -4  922.51   43.30
  -7  -3  -4  902.11   42.60
   7   3  -4  861.51   43.00
   7   3  -4  987.90   45.60
   7  -3   4  861.41   45.70
  -3  -7   4  847.02   42.30
  -7  -3  -4  867.11   44.10
  -7   3   4  828.72   42.20
  -7   3   4  885.91   45.40
   3   7   4  859.41   43.70
   3   7   4  887.31   43.60
   7  -3   4  849.22   42.90
  -3  -7   4  798.12   43.00
  -7  -3  -4  874.31   43.80
  -3   7  -4  883.71   43.90
  -3   7  -4  930.21   44.50
  -3   7  -4  945.81   44.60
   7  -3   4  820.32   43.60
   7   3  -4  864.71   43.20
  -7   3   4  885.71   43.70
   3  -7  -4  829.82   43.80
  -7  -4   4   48.00    6.30
  -4   7   4   53.19    5.50
  -4   7   4   48.40    9.20
   4   7  -4   43.70    7.30
   7  -4  -4   49.99    7.40
  -7   4  -4   36.90    7.90
  -4  -7  -4   55.89    8.20
  -7   4  -4   43.70    5.50
  -4   7   4   51.19    8.40
  -7   4  -4   35.00    8.00
  -4   7   4   45.70    5.10
   4  -7   4   42.50    8.00
  -4  -7  -4   42.40    7.50
   7   4   4   56.19    8.10
   7  -4  -4   46.00    6.70
   4   7  -4   45.30    8.20
  -7  -4   4   40.70    7.30
   7   4   4   49.99    7.10
  -4   7   4   37.00    7.60
   7  -4  -4   66.19   11.20
   7   4   4   54.19    9.40
  -7  -4   4   39.40    7.90
  -4   7  -4   58.79    9.70
   7  -4   4   45.00    5.40
  -7  -4  -4   28.00    6.80
   7   4  -4   35.30    6.70
   7   4  -4   36.60    6.40
  -4  -7   4   32.70    6.30
  -7  -4  -4   35.00    7.00
  -7   4   4   38.60    6.10
   4   7   4   29.20    7.20
  -4   7  -4   51.49    9.10
  -7  -4  -4   44.10    6.10
   7   4  -4   54.39    9.50
  -7   4   4   38.90    7.30
   7  -4   4   44.00    9.60
   4  -7  -4   44.80    8.80
  -4  -7   4   33.40    7.20
  -5   7   4  232.08   18.20
  -5  -7  -4  211.58   16.30
   5   7  -4  215.58   17.20
  -5   7   4  202.78   12.40
  -7   5  -4  212.08   17.10
  -7   5  -4  216.78   12.40
  -7  -5   4  230.88   13.10
   7  -5  -4  215.98   18.70
  -7  -5   4  195.98   16.10
   5  -7   4  202.58   17.30
   7   5   4  211.98   14.00
  -5   7   4  203.48   12.70
  -7  -5   4  229.28   13.00
   7  -5  -4  217.18   14.00
  -5   7   4  250.97   18.60
   7   5   4  228.28   18.20
   5  -7  -4  220.38   17.90
   7   5  -4  231.78   18.50
  -5   7  -4  253.27   18.60
  -5   7  -4  236.68   17.50
  -5  -7   4  230.58   16.50
   7  -5   4  205.98   18.70
  -7   5   4  242.08   14.20
  -7   5   4  237.58   17.10
   7   5  -4  259.17   16.80
  -7  -5  -4  243.58   17.10
   7  -5   4  246.28   12.40
  -5  -7   4  222.48   15.90
   5   7   4  232.38   17.80
  -7  -5  -4  246.98   13.40
   7  -6  -4   61.79   11.60
   7  -6  -4   92.89    8.50
  -6   7   4   69.49    7.00
   7   6   4   90.19   12.40
  -7   6  -4   84.29    5.00
   7   6   4   74.19    7.30
  -7  -6   4   93.19   11.40
   6   7  -4   84.99   11.50
  -7   6  -4   72.59   10.70
  -7  -6   4   90.99    5.70
  -6  -7  -4   87.29   11.20
  -6   7   4   95.29   11.80
  -7  -6   4   81.89    5.50
   6  -7   4   76.39   11.90
   7  -6   4   92.39   13.00
   7   6  -4  100.79   13.30
  -6  -7   4   99.69   11.50
  -7   6   4   76.79   10.40
  -7   6   4   83.69    8.00
   6  -7  -4   82.59   12.00
  -7  -6  -4   97.69    6.70
  -7  -6  -4   74.69   10.10
   6   7   4   99.69   12.60
  -6   7  -4   80.09   10.80
   7  -7   4   85.59   13.40
  -7   7  -4  125.99   14.60
   7  -7  -4  110.19   15.60
  -7  -7  -4  108.39   12.60
  -7   7   4  109.49    8.80
  -7   7   4  126.99   14.20
   7   7   4  114.79   14.10
   7   7  -4  115.59   14.60
  -7  -7   4  104.99   12.70
   7  -7  -4  134.99    9.30
   0   8  -4    6.70    5.60
   0   8   4    6.40    5.50
   0  -8   4    6.40    2.90
   8   0  -4    1.20    5.50
  -8   0   4   -0.90    5.20
   0   8  -4    4.40    3.40
  -8   0  -4    6.40    5.60
   0   8   4    8.80    4.30
  -8   0   4   11.90    5.40
   8   0   4    8.90    5.50
   0   8   4    4.80    4.10
  -8   0  -4    1.20    5.50
   0   8  -4    4.70    4.80
   8   0  -4   -2.10    4.20
   0   8  -4    5.30    3.40
   0   8   4    5.30    3.70
  -8   0  -4    3.40    4.50
   8   0   4    1.90    5.50
   0   8   4   -0.50    5.30
   0  -8   4    3.50    3.40
   8   0   4   -1.90    4.80
  -8   0   4    2.70    4.80
   8   0  -4   -3.80    5.10
   0   8   4    2.30    3.50
  -8   1  -4  123.39   12.50
  -8  -1   4  107.39   11.80
  -8  -1   4  150.98   12.70
  -1   8   4  119.59   12.00
  -8   1  -4  128.89   11.10
   8  -1  -4  132.99   14.60
  -1   8   4  119.09   10.00
   1   8  -4  133.89   12.00
   1   8  -4  114.29    7.50
  -8  -1   4  150.08   12.50
  -1  -8  -4  124.09   10.20
  -1   8   4  122.09   12.60
  -1  -8  -4  119.79   11.90
   1   8  -4  115.89    9.70
   1   8  -4  124.69   12.30
  -1   8   4  120.79    9.60
   8   1   4  122.99   12.70
   8   1   4  123.89   11.90
   1  -8   4  131.99   11.90
  -8   1  -4  101.19   12.20
   8  -1  -4  119.69   11.80
   8   1   4  122.69   13.10
  -1   8   4  123.29   10.70
   8  -1  -4  143.39   11.70
   1   8   4  125.79   12.10
   8   1  -4  141.39   11.80
  -8   1   4  144.19   13.30
  -1   8  -4  122.39    7.50
   8  -1   4  142.29   12.20
  -8   1   4  117.79   12.00
  -1  -8   4  120.49    7.50
  -1   8  -4  120.39   10.40
  -1  -8   4  126.99    9.30
  -1   8  -4  138.99   12.90
   8   1  -4  125.99   12.90
   8  -1   4  140.39   14.90
  -8  -1  -4  122.49   12.50
  -1   8  -4  124.79   11.90
  -1   8  -4  113.19    7.40
   1   8   4  127.39   11.10
   8   1  -4  109.89   12.30
  -8  -1  -4  120.89   12.20
   1  -8  -4  118.79   10.50
   1   8   4  128.59    8.60
   8  -1   4  123.09   11.60
   1   8   4  118.59    8.30
  -8  -1  -4  110.19   11.70
  -8  -2   4   15.60    6.70
   8  -2  -4   15.30    5.60
  -2   8   4   17.30    4.40
  -2   8   4   23.60    7.50
   2   8  -4   16.80    6.30
   8   2   4   13.90    6.90
  -2   8   4   19.70    4.40
  -8   2  -4   15.10    6.40
  -2  -8  -4   14.90    5.10
   2  -8   4   20.40    5.80
  -8   2  -4   13.00    5.00
  -8  -2   4    7.10    5.50
  -2   8   4   17.10    6.00
  -2   8   4   15.70    7.90
  -2  -8  -4   14.70    5.90
  -8  -2   4   17.00    6.80
   8  -2  -4   20.10    5.80
   2   8  -4   12.90    5.40
  -8   2  -4   16.70    7.80
   8  -2  -4   11.80    7.30
   8   2   4   16.90    6.50
   8   2  -4   17.50    5.80
  -8   2   4   22.60    7.90
  -2   8  -4   29.10    7.80
  -8   2   4   18.10    5.70
  -8   2   4   24.00    7.00
  -8  -2  -4   12.40    6.10
   8  -2   4   13.70    5.40
   2   8   4   17.50    2.10
   2   8   4   18.40    2.30
  -2  -8   4   15.00    6.60
   2   8   4   25.70    6.30
   8  -2   4   23.00    7.60
   8   2  -4   19.70    6.70
   8   2  -4   18.40    7.40
  -8  -2  -4   20.50    6.50
  -2  -8   4   19.20    5.10
  -8  -2  -4   13.50    5.90
  -2   8  -4   21.80    5.90
   2  -8  -4   23.80    6.00
  -3   8   4  108.19   12.30
   8  -3  -4   75.89   14.30
  -3  -8  -4  101.29   10.30
   8  -3  -4   86.09    9.50
   8  -3  -4   83.99    9.70
   8   3   4  105.39   20.60
  -8   3  -4   88.69    9.20
   8   3   4   90.79   10.50
  -3   8   4   94.69    7.60
  -3   8   4  124.49   18.20
  -3   8   4   86.29    7.80
  -8  -3   4  102.99   10.50
  -8   3  -4   98.29   11.90
  -8  -3   4   94.69   10.90
   3   8  -4   91.69   10.20
  -3  -8  -4   71.99    9.90
   3  -8   4   88.49   10.40
  -8  -3  -4   90.09    9.80
   3  -8  -4   98.09   11.10
  -3   8  -4  117.69   12.20
   8   3  -4   93.09   13.70
   8  -3   4  101.49    9.40
   8   3  -4  101.39   10.80
  -3  -8   4   93.39   10.60
  -8   3   4   87.79    9.70
  -8  -3  -4  105.89   12.10
   8  -3   4   87.79   14.80
  -8   3   4   84.89   10.50
  -3  -8   4   99.79   10.00
   8   3  -4   77.39   10.30
   3   8   4  101.99   11.50
  -3   8  -4   76.99   12.40
  -8   4  -4  611.04   33.50
   8   4   4  569.54   31.20
   8  -4  -4  595.64   30.70
  -8  -4   4  657.93   30.80
  -4   8   4  589.54   28.40
   4   8  -4  581.24   32.50
  -4  -8  -4  594.54   32.00
  -8   4  -4  611.64   29.80
  -4   8   4  635.04   33.90
  -8  -4   4  576.54   36.70
   4  -8   4  576.04   32.70
   8   4   4  632.94   34.70
  -4  -8  -4  540.35   32.00
  -4   8   4  565.84   28.10
  -4   8   4  645.74   33.90
   8  -4  -4  553.04   34.80
  -4   8  -4  625.24   33.90
  -4   8  -4  617.54   33.80
   4  -8  -4  591.34   33.30
  -8  -4  -4  630.14   30.70
   8   4  -4  613.74   31.50
  -8   4   4  569.94   35.10
   4   8   4  603.24   33.30
  -4  -8   4  587.24   31.30
  -8  -4  -4  578.64   32.70
  -8   4   4  608.34   30.80
  -4  -8   4  563.94   32.20
   8  -4   4  619.74   29.60
   8   4  -4  662.53   35.00
   8  -4   4  556.84   34.90
  -5   8   4  359.16   18.30
  -8  -5   4  341.87   23.00
   8  -5  -4  369.26   20.50
  -5   8   4  343.47   18.00
  -8   5  -4  368.36   24.00
   8   5   4  366.36   25.20
  -5   8   4  375.06   24.20
   5  -8   4  354.76   24.10
  -8  -5   4  367.86   19.60
  -5  -8  -4  320.17   22.50
   8   5   4  335.27   20.40
   8  -5  -4  320.07   25.00
   8  -5   4  338.87   25.60
   8   5  -4  372.26   25.20
   8  -5   4  398.06   19.00
  -8  -5  -4  359.56   23.50
   5   8   4  423.66   25.00
  -5   8  -4  368.66   24.20
  -8   5   4  358.66   20.30
  -8  -5  -4  380.16   19.80
  -8   5   4  370.56   23.70
  -5  -8   4  349.37   22.80
   8   5  -4  372.66   21.70
   8  -6  -4   28.40    6.10
   6   8  -4   16.80    8.10
  -8   6  -4   28.80    4.00
   8  -6  -4   26.20   10.00
   8   6   4   20.50    5.20
  -8  -6   4   30.50    4.30
  -8   6  -4   31.80    9.50
   6  -8   4   15.90    8.30
  -8  -6   4   36.70    9.30
  -6   8   4   32.20    4.60
   8   6   4   15.60    8.90
  -6  -8  -4   33.20    8.80
  -8  -6   4   34.10    4.70
  -6   8   4   28.40    8.60
  -6   8   4   31.90    4.30
  -8   6   4   28.80    8.70
  -8  -6  -4   33.30    4.90
   8   6  -4   34.70   10.60
   6   8   4   31.00    9.80
  -6   8  -4   15.40    7.90
  -8   6   4   27.20    5.50
   6  -8  -4   31.80    9.20
  -6  -8   4   31.70    8.60
   8  -6   4   28.60   10.60
   8  -6   4   31.20    4.00
  -8  -6  -4   34.80    9.30
   8  -7  -4   60.39    7.00
   8  -7  -4   72.29   14.30
  -7   8   4   60.79    6.10
  -8   7  -4   49.70   10.80
  -7  -8  -4   54.29   10.70
  -7   8   4   66.69    6.40
  -8  -7   4   51.39   10.20
   7  -8   4   46.20   11.10
  -7   8   4   62.49   11.20
   7   8  -4   65.19   12.10
   8   7   4   88.09   14.40
  -7  -8   4   51.99   10.20
   7  -8  -4   50.19   11.80
  -7   8  -4   53.79   10.80
  -8  -7  -4   33.40    9.30
   8   7  -4   47.90   11.50
  -8   7   4   53.49   10.60
  -8   7   4   54.09    6.70
   8  -7   4   52.99   12.70
   7   8   4   68.69   12.70
  -8  -8   4    1.10    7.50
   8   8   4   -5.80    8.90
   8  -8  -4   -6.30    8.70
   8  -8   4    3.80    9.10
  -8   8   4   -7.00    7.90
   8   8  -4    0.80    8.50
  -8  -8  -4   -6.50   11.90
  -8   8   4    4.30    3.80
  -8   8   4    5.10    3.40
  -9   0  -4   96.89   11.20
   9   0  -4   93.99   11.80
   0   9   4   90.69    9.40
  -9   0  -4   66.39   10.10
  -9   0   4   85.79   16.40
   0   9  -4  101.29   12.10
   0  -9   4   87.09    8.00
   9   0   4   82.19   12.30
   0   9   4   83.19    8.90
   9   0   4   95.29   11.70
   0  -9   4   91.49    7.20
   0   9   4   87.19   10.70
   0   9  -4   76.29    7.70
   0   9  -4   78.59    7.70
   0   9   4   84.79    8.50
   0   9   4   79.69   10.80
   9   0  -4   94.69   12.80
   9   1   4   86.09   12.10
   1   9  -4   96.99   11.80
   1  -9   4   92.99    9.60
  -9  -1   4  133.09   13.70
  -1   9   4   97.19    9.10
   9  -1  -4   99.59   13.50
  -1   9   4   97.89    9.20
  -9   1  -4  104.09   12.80
   9  -1  -4  100.59   11.90
   1   9  -4   91.39    6.20
  -1   9   4   98.89   10.20
   1   9  -4   87.49    9.30
   9   1   4   96.49   13.60
  -1   9   4  113.09   13.10
  -9   1  -4  100.79   11.00
   9   1  -4   94.69   12.90
  -9   1   4   89.59   12.70
  -1   9  -4   98.99    9.90
   1   9   4  100.39   10.50
  -1  -9   4   95.49    8.40
  -9   1   4   86.09   11.10
   9  -1   4  108.19   11.60
   9   1  -4   91.49   12.50
  -9  -1  -4   88.79   11.70
   1  -9  -4   95.39   10.10
   9  -1   4   94.49   13.20
   1   9   4   90.89    7.40
  -1  -9   4   97.09    6.10
  -1   9  -4   82.29    6.40
  -9  -1  -4  131.59   13.90
  -1   9  -4  101.59    6.60
  -1   9  -4   91.09   11.40
   1   9   4   89.09    7.20
   9   2   4  341.97   22.80
   2   9  -4  348.27   20.60
   9   2   4  358.86   23.50
   9  -2  -4  368.16   24.90
  -2  -9  -4  341.77   22.00
  -9   2  -4  345.47   22.70
  -2   9   4  312.77   18.10
  -9  -2   4  373.16   22.30
   9  -2  -4  345.37   21.50
   2  -9   4  330.17   20.40
  -2   9   4  346.77   21.30
  -9   2  -4  337.67   21.40
  -9  -2   4  345.37   22.20
  -2   9   4  361.96   23.30
  -2  -9  -4  315.37   23.30
  -2   9   4  345.17   18.50
  -9   2   4  325.07   22.00
   9   2  -4  323.17   22.50
   2  -9  -4  352.36   21.10
  -9  -2  -4  358.16   22.10
  -2   9  -4  347.57   21.10
  -9  -2  -4  301.97   22.00
  -2   9  -4  354.96   23.10
  -2  -9   4  354.36   19.60
  -9   2   4  313.57   20.80
   2   9   4  364.16   21.80
   9  -2   4  335.97   20.90
   9   2  -4  345.17   23.50
   9  -2   4  310.87   24.20
   9  -3  -4  109.49   11.50
  -3  -9  -4  115.39   11.50
   3   9  -4   99.69   11.20
  -9  -3   4  109.79   11.80
  -3   9   4  107.89    8.40
  -3   9   4   92.89    7.90
   9   3   4   82.29   12.10
  -3   9   4  126.39   14.40
   9  -3  -4  132.19   16.20
   3  -9   4   98.29   11.60
  -9   3  -4  114.29   13.60
  -9  -3   4  112.09   12.80
  -9   3  -4  111.39   11.00
  -3   9   4  123.79   13.10
   9   3   4  114.49   12.80
  -3  -9  -4   89.39   11.50
  -3   9  -4  116.39   13.40
  -3  -9   4  114.59   12.60
   3  -9  -4  102.49   11.80
  -9  -3  -4   91.49   12.40
   9   3  -4  122.79   14.50
   9   3  -4  128.49   13.30
   9  -3   4   91.69   13.80
  -3  -9   4  116.29   12.40
   3   9   4  118.69   12.70
  -9  -3  -4  109.39   11.70
  -9   3   4  107.49   11.20
  -3   9  -4  141.89   15.70
   9  -3   4  109.09   11.00
  -9   3   4  114.49   13.00
  -4   9   4  163.88   10.20
   9   4   4  171.18   17.70
  -4   9   4  138.99   20.50
  -9   4  -4  168.68   12.70
   9  -4  -4  184.08   14.00
   9   4   4  138.39   14.30
  -4   9   4  194.88   17.30
  -4  -9  -4  154.18   15.50
  -9   4  -4  161.58   16.50
   4   9  -4  150.18   15.10
  -4   9   4  181.18   10.60
   4  -9   4  177.28   15.70
  -9  -4   4  186.58   16.40
   9  -4  -4  179.68   19.80
  -9  -4   4  168.58   13.40
   9   4  -4  180.78   18.00
  -9   4   4  199.08   16.70
  -9  -4  -4  182.88   16.40
   9  -4   4  195.58   13.10
  -9  -4  -4  188.38   13.90
  -4   9  -4  197.48   16.90
   9  -4   4  192.98   19.40
   9   4  -4  172.18   14.70
   4   9   4  163.88   15.90
   4  -9  -4  185.48   16.60
  -4  -9   4  178.38   16.00
  -4  -9   4  181.18   15.50
  -4   9  -4  215.58   17.80
   5  -9   4    1.30    6.90
  -5  -9  -4    7.50    6.90
  -5   9   4   10.90    2.80
  -9  -5   4   10.90    5.00
  -5   9   4   14.90    8.60
  -5   9   4   13.20    3.10
   9  -5  -4    3.30    5.10
   5   9  -4    7.80    7.70
  -9   5  -4    6.30    8.10
   9   5   4    8.40    8.30
  -9   5  -4   18.40    4.80
   9   5   4    7.60    5.80
  -9  -5   4    9.50    7.60
   9  -5  -4   13.60    8.90
   9  -5   4   13.40    4.70
  -5   9  -4   12.40    8.90
  -9  -5  -4   17.20    5.30
   5   9   4    5.90    7.60
   9   5  -4   10.80    5.60
   5  -9  -4   14.30    8.20
   9  -5   4   21.80    9.80
  -9  -5  -4    7.00    7.90
  -5  -9   4    4.50    7.50
  -9   5   4   10.60    5.10
   9   5  -4    8.10    8.20
  -9   5   4   18.40    8.40
  -6   9   4   15.10    2.70
   9  -6  -4   16.50    5.80
  -9  -6   4   17.90    4.40
  -6  -9  -4    7.10    7.70
  -9  -6   4   15.40    4.80
  -6   9   4   12.20    2.40
   9   6   4   21.70   10.50
  -6   9   4   11.00    8.80
   9   6   4   17.30    5.70
   9  -6  -4   25.60   10.90
  -9  -6   4   18.50    8.80
   6   9  -4   15.40    8.90
  -9   6  -4   12.20    3.80
   6  -9   4   20.30    9.00
  -9   6  -4   30.40   10.30
  -9  -6  -4   18.00    4.70
   6   9   4   10.40    9.10
  -9   6   4   17.70    5.40
   9  -6   4   12.90    4.00
  -9  -6  -4    2.70    7.90
  -6   9  -4    9.70    8.80
   6  -9  -4   21.00    9.50
  -9   6   4   11.00    8.60
   9  -6   4    5.50    8.90
   9   6  -4   16.40   10.00
  -6  -9   4   14.50    8.50
   9  -7  -4   28.70    6.10
   9   7   4   14.90   16.30
  -9   7  -4   16.90   11.10
   9   7   4   26.70    4.00
   7   9  -4   22.50    9.80
  -7  -9  -4   25.90   10.70
   9  -7  -4    3.80   14.40
  -9  -7   4   16.60    9.00
  -7   9   4   26.40   10.20
   7  -9   4   22.80   10.00
  -9   7   4   22.70    5.30
  -7   9  -4   26.30   11.40
   9  -7   4   38.30   15.90
  -9   7   4   19.10    9.60
   9   7  -4   28.60   17.50
   7   9   4   23.70   10.60
  -7  -9   4   14.50    8.60
   7  -9  -4   22.70   10.80
  -9  -7  -4   27.80    3.20
  -9  -7  -4   25.30   13.40
  -9  -8   4   38.80   11.00
  -9   8  -4   38.90   12.40
   8   9  -4   26.50   11.30
   9   8   4   18.00   10.70
  -8  -9  -4   34.00   10.70
   8  -9   4   14.80   10.50
   9  -8  -4   32.20   12.50
  -8   9   4   22.00   10.20
  -9   8   4   35.50   11.30
   8   9   4   30.50   11.40
   8  -9  -4   33.30   12.10
   9   8  -4   41.40   12.30
  -8  -9   4   26.20   10.20
   9  -8   4   33.10   12.60
  -8   9  -4   54.39   13.00
  -9  -8  -4   24.00    9.80
   0 -10   4 1582.94   67.59
  10   0  -4 1566.84   72.99
   0  10  -4 1589.04   73.09
   0  10   4 1562.44   69.79
  10   0   4 1438.56   73.89
 -10   0  -4 1563.74   72.79
   0  10   4 1378.76   68.89
   0  10   4 1510.55   68.49
   0  10  -4 1465.05   67.49
   0  10  -4 1452.75   67.49
 -10   0   4 1497.95   71.89
  10   0  -4 1442.46   73.89
   0  10   4 1410.16   70.19
   0  10   4 1543.05   73.19
  10   0   4 1504.55   72.29
  10   1   4  417.76   26.00
  -1  10   4  407.26   21.50
 -10  -1   4  376.56   24.80
  -1  10   4  330.57   21.60
 -10   1  -4  382.06   25.00
   1  10  -4  377.66   21.40
  -1  10   4  444.86   26.80
  10  -1  -4  400.46   24.90
  -1  10   4  370.86   22.10
   1  10  -4  403.16   25.70
   1 -10   4  385.56   21.50
  -1  10   4  359.36   20.80
  10  -1  -4  346.57   26.50
  10   1   4  362.06   25.90
   1  10   4  392.76   25.80
  -1  10  -4  350.26   17.90
   1  10   4  368.06   18.50
   1  10   4  354.66   22.30
  -1  10  -4  409.86   22.10
  -1  10  -4  421.16   26.00
  10   1  -4  377.56   26.10
   1  10   4  380.76   18.80
  -1  10  -4  353.16   18.00
 -10  -1  -4  394.16   25.40
 -10   1   4  390.86   24.70
   1  10   4  379.16   22.80
  10   1  -4  417.46   26.50
  -1 -10   4  412.86   20.70
  10  -1   4  382.26   27.10
  10  -2  -4  129.99   17.20
  -2  10   4  129.99   10.90
 -10   2  -4  119.99   12.40
  -2  10   4  118.29    9.60
  10   2   4  128.19   14.90
   2  10  -4  123.89   12.10
  -2 -10  -4  118.99   13.50
  -2  10   4  122.29   14.20
  -2 -10  -4  111.39   11.30
 -10   2  -4  134.79   14.50
  10  -2  -4  109.19   12.70
   2  10  -4  117.59   13.70
 -10  -2   4  130.29   14.40
  -2  10   4  126.79   12.90
   2 -10   4  126.59   12.20
   2 -10  -4  129.89   12.90
  -2  10  -4  136.99   12.60
   2  10   4  118.89   12.90
 -10  -2  -4  100.19   13.30
  10   2  -4  132.09   14.70
  -2 -10   4  138.29   10.90
  10   2  -4  125.69   15.50
  -2  10  -4  108.89   13.70
 -10   2   4  105.99   13.10
  10  -2   4  105.69   11.90
  10  -2   4  119.99   16.30
 -10  -3   4  208.28   17.60
   3 -10   4  191.78   16.00
  10   3   4  179.48   16.90
  -3 -10  -4  202.68   17.20
  10  -3  -4  176.78   20.60
  -3  10   4  191.98   16.50
   3  10  -4  192.18   16.00
 -10   3  -4  177.68   17.80
  -3  10   4  191.68   11.60
  -3  10   4  193.28   18.40
  10   3   4  209.38   19.40
 -10   3  -4  203.68   14.80
  -3  10   4  175.78   11.10
 -10  -3   4  210.28   16.20
  10  -3  -4  199.38   16.20
  -3 -10   4  167.78   13.80
   3 -10  -4  195.78   16.50
 -10  -3  -4  207.78   15.90
   3  10   4  185.68   16.80
  10   3  -4  188.48   19.10
  -3 -10   4  168.98   16.70
 -10  -3  -4  179.88   17.30
  10  -3   4  184.48   15.10
  10  -3   4  159.08   19.10
  -3  10  -4  195.68   18.30
  -3  10  -4  198.38   16.30
 -10   3   4  162.48   17.20
  10   3  -4  186.58   17.20
  -4  10   4   84.19    6.30
  -4  10   4   94.99    6.60
  10   4   4   86.09   11.80
 -10  -4   4  137.29   13.90
   4 -10   4  103.79   12.80
  -4  10   4   99.89   14.60
  10  -4  -4  103.09   11.40
  -4 -10  -4  104.39   13.60
   4  10  -4  116.79   13.30
 -10   4  -4  107.19   10.70
 -10   4  -4   95.29   13.90
  10   4   4  101.29   14.70
  10  -4  -4  100.89   15.40
 -10  -4   4  103.59   13.50
   4  10   4  101.39   13.60
 -10   4   4  110.39   14.20
  10  -4   4   82.69   14.70
 -10  -4  -4  114.29   12.00
   4 -10  -4   74.89   11.80
  -4 -10   4  117.29   14.00
  10   4  -4   68.19   12.70
 -10   4   4  104.49   11.40
 -10  -4  -4   78.99   12.80
  -4  10  -4  116.49   15.30
  10  -4   4   97.19   10.30
  10   4  -4   99.29   12.60
 -10  -5   4   90.49   13.00
  10   5   4   76.29   10.40
  10   5   4   74.89   13.50
  -5 -10  -4   57.59   11.80
 -10   5  -4   85.09   13.40
  -5  10   4   79.39   13.20
 -10   5  -4   96.29    9.60
   5 -10   4   80.69   12.60
 -10  -5   4   93.59    9.90
  10  -5  -4   98.69   16.30
   5  10  -4   92.49   13.50
  10  -5  -4   91.19   10.40
   5  10   4   95.29   14.20
 -10  -5  -4   51.59   11.20
  10  -5   4   61.19   13.40
 -10  -5  -4   86.89    9.80
  -5  10  -4  101.19   15.20
 -10   5   4   83.09    9.80
   5 -10  -4   80.09   12.90
  10   5  -4   92.19   15.20
  10   5  -4   76.59   10.30
  10  -5   4   84.19    9.00
  -5 -10   4   77.39   12.70
 -10   5   4   94.49   14.00
  10   6   4   71.69   14.00
  -6  10   4   87.79   14.60
   6  10  -4   83.49   13.20
  10  -6  -4  114.49   11.30
  -6 -10  -4   75.19   12.60
 -10  -6   4  114.29   10.70
  10   6   4   83.99   10.00
  10  -6  -4   74.09   14.70
 -10  -6   4  102.19    8.90
 -10   6  -4   88.49   14.50
 -10  -6   4   73.99   12.50
   6 -10   4   75.49   12.70
  10  -6   4   80.79   15.70
   6 -10  -4   83.09   14.30
  -6 -10   4   57.59   14.30
 -10  -6  -4   60.79   12.20
  10   6  -4   93.79   15.70
   6  10   4   76.49   14.00
  -6  10  -4   73.69   13.10
 -10  -6  -4   98.19    9.10
 -10   6   4   91.89   10.20
  10  -7  -4   18.70   11.70
  -7 -10  -4   25.80   10.80
 -10  -7   4   36.60   10.90
  10  -7  -4   34.50    6.80
   7  10  -4   20.90   12.10
  10   7   4    6.80   10.30
  -7  10   4   30.90   12.10
 -10   7  -4   13.50   11.10
   7  10   4   29.60   12.10
 -10  -7  -4   17.80   10.30
  -7  10  -4   20.70   11.50
 -10   7   4   16.40   10.30
  -7 -10   4   26.10   10.50
  10   7  -4   32.90   12.00
  10  -7   4   20.20   12.00
 -11   0   4    1.90    8.00
   0  11   4   -5.10    4.40
  11   0   4   -1.40    8.20
   0  11  -4   -3.60    3.40
   0  11  -4   -0.20    3.40
   0  11   4    1.60    7.90
   0  11  -4   -1.20    5.10
   0 -11   4    5.50    3.60
  11   0  -4   -0.40    8.50
  11   0   4    0.90    7.30
 -11   0  -4   -2.80    7.50
   0  11  -4    1.40    8.20
   0  11   4    1.70    4.50
   0  11   4   -0.60    4.80
  11   0  -4    7.50    8.70
   0  11   4    0.10    5.30
  -1  11   4  141.19   12.40
  -1  11   4  155.78   13.40
 -11  -1   4  190.28   18.00
  11  -1  -4  155.28   19.20
   1  11  -4  161.28   17.60
  11  -1  -4  165.38   17.30
  11   1   4  139.69   17.20
   1 -11   4  179.68   12.90
   1  11  -4  161.78   13.00
  -1  11   4  141.19   16.90
  -1  11   4  163.78   12.10
 -11   1  -4  136.29   15.90
  11   1   4  185.18   18.60
  -1  11   4  163.48   13.50
  11   1  -4  148.39   17.80
  -1 -11   4  171.48   11.70
  11   1  -4  193.98   19.30
   1  11   4  164.98   14.70
  11  -1   4  170.98   20.00
  -1  11  -4  162.98   17.20
   1  11   4  152.98   17.00
 -11  -1  -4  165.28   17.40
  -1  11  -4  169.18   12.90
   1  11   4  166.48   13.90
  11  -1   4  175.48   16.90
 -11   1   4  166.28   17.10
  -2  11   4   88.09   14.10
   2  11  -4   93.29   11.10
   2 -11   4  101.09   11.20
  -2  11   4  116.09   13.50
  11  -2  -4   76.79   11.80
  -2  11   4   85.89    8.90
  11   2   4   89.69   13.50
   2  11  -4   77.59   13.00
  -2  11   4   90.79    8.40
  11  -2  -4   77.89   14.50
 -11  -2   4   81.09   13.10
 -11   2  -4  128.09   15.80
  11   2   4  107.79   15.60
  11  -2   4  123.09   17.20
  11   2  -4   95.79   14.10
  -2 -11   4  104.79   10.00
  -2  11  -4  104.79   11.60
 -11   2   4   88.89   12.90
  11  -2   4  114.49   13.40
 -11  -2  -4  109.49   14.70
   2  11   4   80.89   13.40
  11   2  -4  105.89   15.40
   2  11   4   87.19   13.50
  -2  11  -4  112.79   15.60
 -11  -3   4   22.00    8.80
  11  -3  -4   24.30    8.30
  -3 -11  -4   30.30   10.70
 -11   3  -4   16.80   12.50
   3 -11   4   41.60    8.60
  -3  11   4   34.60    4.50
   3  11  -4   47.50   11.80
  -3  11   4   27.30    4.10
  11  -3  -4   27.20   12.60
  11   3   4   40.30   10.20
  11   3   4   29.90   11.10
   3  11   4   31.80    9.20
   3 -11  -4   29.20    8.30
  11  -3   4   31.60   13.10
  11  -3   4   25.00    9.40
  11   3  -4   25.90    9.30
  -3  11  -4   22.00   16.10
  11   3  -4   35.50   13.30
 -11   3   4   29.90   10.10
  -3  11  -4   26.50    8.70
 -11   4  -4  108.89   11.20
   4 -11   4   87.69   12.40
 -11  -4   4  119.29   15.60
  11  -4  -4   92.59   17.10
  -4 -11  -4   84.99   13.40
  11   4   4  115.69   16.60
  11   4   4   99.19   15.10
   4  11  -4   94.69   13.20
  11  -4  -4  103.79   12.20
  -4  11   4  114.39   16.20
 -11   4  -4  110.79   15.70
 -11  -4  -4  102.49   14.90
   4  11   4   88.39   13.40
  11   4  -4   97.79   16.20
  11  -4   4   80.79   15.60
  11   4  -4   90.99   12.90
  -4  11  -4  102.39   15.00
  11  -4   4  109.49   11.50
   4 -11  -4   98.39   13.50
  -4 -11   4  113.09   15.00
   5 -11   4   15.90    8.50
  11  -5  -4   24.50    7.50
   5  11  -4   18.30    8.90
  -5 -11  -4   22.10    9.60
 -11   5  -4   13.70   10.10
  11  -5  -4   20.90   11.70
  11   5   4   21.30    8.00
 -11  -5   4    3.90    9.10
  11   5   4   15.30   10.70
  -5  11   4   16.70   11.20
   5 -11  -4   19.30    9.30
  11  -5   4   25.30   11.90
 -11   5   4   21.00   10.10
   5  11   4   15.90    9.40
  11  -5   4   27.80    6.80
  11   5  -4   26.70   11.10
 -11  -5  -4   13.60    9.90
  -5  11  -4   19.80   11.30
  -5 -11   4   15.60    9.60
  11   5  -4   16.90    7.80
 -12   0  -4   29.20   10.50
   0  12   4   48.30    8.40
  12   0   4   28.30   11.20
  12   0   4   36.00   10.60
   0  12  -4   46.50   12.40
   0  12  -4   37.30    5.50
  12   0  -4   40.80   12.20
   0  12   4   55.89   12.20
   0  12   4   40.20    5.50
  12   0  -4   32.40   11.30
 -12   0   4   56.19   12.30
  12  -1  -4   70.59   15.10
 -12   1  -4   53.49   12.20
   1  12  -4   78.59   14.20
  -1  12   4   51.89    8.30
  12  -1  -4   68.29   12.70
  -1  12   4   60.59    8.00
  12   1   4   64.39   13.30
 -12  -1   4   68.79   12.40
   1  12  -4   62.49    8.40
   1 -12   4   77.19    8.50
  -1  12   4   72.79   14.50
  12   1   4   57.69   19.50
  12  -1   4   56.69   11.50
  12  -1   4   43.70   12.50
   1  12   4   62.69   12.80
  12   1  -4   39.80   11.40
 -12  -1  -4   54.99   12.70
  -1  12  -4   60.99   13.50
  12   1  -4   59.39   13.30
 -12   1   4   66.99   12.90
   1  12   4   67.49   10.20
  -2  12   4   17.50    7.00
  12   2   4   16.20   11.40
  -2  12   4    7.20    9.50
   2  12  -4   16.80   10.00
   2 -12   4   25.70    7.20
  12   2   4   13.60    9.50
 -12  -2   4   17.30    9.60
   2  12  -4   10.40    6.80
 -12   2  -4    1.80    8.80
  12  -2  -4   13.00    9.10
  12  -2  -4   30.00   12.00
  12  -2   4   14.30   10.70
  -2  12  -4   17.20   10.50
   2  12   4    7.50    7.30
  12   2  -4   20.10   11.20
   2  12   4   24.60   11.30
  12  -2   4   21.90    9.00
  12   2  -4    9.60    9.20
 -12  -2  -4   15.00    9.70
 -12   2   4   12.50    9.00
   0   0   5    0.70    1.10
   0   0  -5    0.70    0.40
   0   0   5   -0.50    0.90
   0   0  -5    1.30    1.10
   0   0  -5    0.20    1.00
   0   0   5    1.20    0.50
   1   0   5    3.80    1.20
   1   0   5    2.20    1.50
   1   0  -5    7.40    1.80
   1   0   5    3.90    1.50
  -1   0  -5    2.80    1.50
   0   1   5    4.30    1.50
   0  -1  -5    2.60    1.30
   1   0   5    3.60    1.30
   0   1  -5    5.50    1.30
   0  -1   5    4.50    1.30
   0   1   5    4.70    1.00
   0   1  -5    4.30    1.50
  -1   0   5    3.60    1.50
   0  -1  -5    2.30    1.30
   0   1  -5    4.60    1.00
   1   0  -5    5.00    0.70
  -1   0   5    5.00    0.70
   0  -1   5    5.30    1.00
  -1   0   5    3.60    1.50
  -1   0  -5    6.10    1.20
   0  -1  -5    3.90    1.00
   0  -1   5    3.80    1.50
   0   1   5    5.40    1.60
  -1   1   5  151.68    8.50
   1  -1  -5  150.48    7.20
   1   1   5  155.68    8.20
  -1  -1  -5  165.18    8.30
  -1   1  -5  142.99    7.60
   1  -1  -5  145.09    8.10
  -1  -1  -5  145.69    7.50
   1   1   5  147.49    8.10
  -1  -1   5  147.99    8.10
   1   1  -5  150.78    7.10
  -1   1   5  148.99    8.10
   1   1  -5  145.19    8.10
   1  -1   5  141.59    8.30
   1  -1   5  152.68    7.50
  -1   1   5  145.69    7.20
  -1  -1   5  144.49    7.90
  -1  -1   5  147.59    7.10
  -1   1  -5  156.58    8.50
  -1  -1  -5  149.88    8.10
   1   1   5  157.78    7.70
   1  -1   5  137.19    7.50
   1   1  -5  146.99    7.90
  -2   0  -5 1567.14   78.49
  -2   0   5 1504.95   73.59
   0   2   5 1631.24   79.89
   0   2  -5 1617.44   75.69
   0  -2   5 1607.14   75.59
   0  -2  -5 1490.35   74.89
   2   0   5 1607.74   78.79
   0   2   5 1656.23   75.89
   2   0   5 1498.75   77.29
   0   2  -5 1497.25   74.99
   2   0  -5 1663.83   81.79
  -2   0  -5 1561.54   76.99
  -2   0   5 1599.34   81.39
   0   2  -5 1545.85   74.89
   2   0  -5 1557.24   73.29
   2  -1   5 1231.78   54.59
  -2   2  -5  228.78   12.40
  -2  -2   5  203.38   10.70
  -2  -2   5  212.78   10.90
  -2  -2  -5  225.18   11.90
   2  -2   5  214.88   12.20
   2  -2  -5  212.28   12.30
   2  -2   5  213.78   10.10
  -2  -2  -5  213.58   11.00
  -2   2   5  204.28   11.00
   2  -2  -5  215.38   11.30
  -2  -2   5  210.68   10.80
  -2   2   5  216.88   12.20
   2  -2  -5  223.68   11.00
   2   2   5  227.48   11.40
   2   2  -5  215.68   10.80
  -2   2   5  214.28   11.30
  -2  -2  -5  202.48   11.20
   2   2  -5  213.48   11.80
   2  -2   5  215.78   10.10
   2  -2   5  217.38   11.40
  -2   2  -5  216.68   11.40
   2   2   5  222.28   11.90
  -2  -2   5  197.18   11.40
   2   2   5  206.88   11.10
   3   0  -5   85.29    5.50
  -3   0  -5   88.59    6.30
   0   3  -5   76.79    5.70
   0  -3   5   78.39    5.70
  -3   0  -5   87.59    6.80
  -3   0   5   80.69    6.30
   0   3  -5   87.59    5.70
   3   0   5   85.19    6.30
   0  -3  -5   87.59    6.00
   0   3  -5   92.19    5.90
   3   0  -5   75.29    6.50
  -3   0   5   88.49    6.60
   0  -3   5   80.69    5.00
   3   0  -5   79.59    6.30
   0   3   5   88.09    6.00
   0   3   5   81.49    5.80
   0   3   5   81.29    5.90
  -3   0   5   87.99    5.70
   3   0   5   80.29    6.70
   0   3   5   87.09    6.00
   0   3  -5   81.29    5.10
  -3   0  -5   87.49    6.00
   0   3   5   90.29    6.00
   3   0   5   90.49    6.20
  -3   1  -5  233.28   13.40
   1   3  -5  226.88   11.40
   3  -1  -5  214.48   12.40
   1   3  -5  204.98   11.90
   1  -3   5  219.68   12.10
   1  -3   5  228.38   12.60
   3   1   5  231.68   12.80
  -1   3   5  242.58   12.40
  -1   3   5  236.18   12.30
  -1  -3  -5  235.88   12.50
   3   1   5  230.48   12.40
  -3  -1   5  208.28   12.60
  -3  -1   5  230.58   12.50
   3  -1  -5  224.68   13.30
  -3   1  -5  217.78   11.80
   1  -3   5  220.48   10.60
   3  -1  -5  219.98   11.80
   3   1   5  228.28   12.70
   1   3  -5  225.38   11.90
  -1  -3  -5  224.18   11.60
  -3   1  -5  225.88   12.50
  -1   3   5  233.08   12.80
  -1   3   5  219.38   12.00
  -1  -3  -5  225.08   12.10
  -3  -1   5  235.38   11.90
   3   1  -5  241.08   12.70
  -3  -1  -5  245.18   12.80
   3   1  -5  239.78   13.00
   3   1  -5  241.78   11.80
  -1  -3   5  235.88   11.50
   3  -1   5  250.77   12.00
  -1  -3   5  230.78   11.90
  -1  -3   5  236.48   12.00
  -1   3  -5  239.58   12.80
  -3  -1  -5  243.18   12.80
   1  -3  -5  258.97   12.20
   3  -1   5  233.48   13.40
  -3   1   5  232.18   12.00
  -3  -1  -5  229.18   12.40
   1   3   5  237.58   11.80
  -3   1   5  241.58   13.30
  -1   3  -5  248.08   12.50
  -1   3  -5  230.48   10.70
   1   3   5  252.17   12.80
   3  -1   5  231.98   12.60
   1   3   5  232.88   12.20
   1  -3  -5  240.08   12.90
  -3   1   5  240.58   12.70
  -3   2  -5 1614.54   71.49
  -3   2  -5 1568.64   68.89
  -3  -2   5 1662.13   69.79
   3  -2   5 1550.54   70.29
  -2  -3   5 1562.24   68.99
  -2  -3   5 1567.64   68.89
  -2   3  -5 1566.54   70.99
  -3  -2  -5 1536.45   70.59
  -3  -3  -5  410.76   20.50
  -3  -3  -5  396.76   20.90
  -3   3  -5  420.46   21.70
   3  -3  -5  404.36   19.80
   3   3   5  401.46   20.40
  -3  -3   5  393.26   20.50
  -3   3   5  415.66   20.40
  -3   3   5  408.66   21.50
   3  -3   5  387.06   21.30
   3  -3  -5  409.86   20.20
  -3  -3  -5  403.56   19.30
  -3   3   5  397.76   19.90
  -3   3  -5  373.96   20.40
   3  -3  -5  426.16   21.80
   3  -3   5  394.26   20.50
  -3  -3   5  410.06   19.00
   3   3   5  392.46   19.60
   3  -3   5  404.16   18.10
   3   3  -5  425.96   20.00
  -3  -3   5  423.76   19.20
   3   3  -5  420.16   21.00
  -3  -3   5  377.46   19.80
  -4   0  -5  777.12   35.60
  -4   0   5  744.63   36.10
   4   0  -5  718.73   34.80
   4   0   5  738.63   34.70
   0   4   5  711.53   34.00
   0   4   5  719.83   34.10
   0   4  -5  737.63   34.20
   0   4  -5  723.43   33.70
   0  -4   5  705.23   33.60
  -4   0   5  711.13   34.00
   0   4  -5  758.72   34.40
   4   0   5  791.12   34.60
  -4   0  -5  691.13   34.20
   0  -4   5  719.53   32.90
   0   4   5  731.03   34.00
   4   0   5  728.33   35.30
   0   4  -5  709.63   33.10
   0   4   5  741.03   34.30
   4   0  -5  715.23   35.20
   4   0  -5  732.63   33.90
   0   4   5  826.12   35.90
   0  -4  -5  755.02   34.30
  -4   0   5  762.12   35.20
  -4   0  -5  722.43   34.60
  -1  -4  -5  104.09    7.40
  -1   4   5   95.49    6.80
  -1   4   5  102.69    7.60
  -4  -1   5  108.59    7.70
   4  -1  -5  102.39    8.70
   1  -4   5   98.19    7.30
  -1   4   5  105.49    7.10
   4   1   5  102.59    7.70
   4   1   5  110.99    8.10
   1   4  -5  108.19    7.30
  -4   1  -5  108.89    7.90
  -4  -1   5   93.09    7.70
  -4  -1   5   93.79    7.00
  -4   1  -5   98.09    6.90
   1   4  -5   94.29    6.00
  -1  -4  -5   97.79    7.30
   4  -1  -5   92.09    6.90
   4   1   5   94.39    7.90
   1   4  -5  102.59    6.90
   1  -4   5   98.59    5.10
  -4   1  -5  115.49    8.80
  -1   4   5  106.89    7.80
   4  -1  -5  102.29    7.70
   4  -1   5  103.29    7.00
   4   1  -5  102.79    7.90
  -1  -4   5   92.29    6.50
  -1   4  -5  103.29    7.60
  -1   4  -5   94.19    5.20
  -1   4  -5   94.79    8.20
  -4   1   5   99.09    7.60
   4  -1   5  100.79    7.80
  -4  -1  -5  107.19    7.80
  -1  -4   5  102.89    6.10
   1   4   5   88.99    6.30
  -1  -4   5   98.29    7.20
  -4   1   5  103.89    7.30
   1   4   5   97.09    7.30
   1   4   5   93.99    6.50
  -4   1   5  107.09    8.40
   1  -4  -5   98.49    7.60
   4  -1   5  100.39    8.60
  -4  -1  -5  102.19    7.80
   1   4   5   99.09    7.60
   4   1  -5  108.39    8.30
   4   1  -5  105.69    7.10
  -1   4  -5   91.99    7.40
  -4  -1  -5  105.29    7.90
   4   2   5   28.80    4.50
   4  -2  -5   18.70    4.60
  -2  -4  -5   23.90    3.00
   4  -2  -5   20.40    3.80
  -2   4   5   30.40    3.80
  -2   4   5   18.20    3.60
   2   4  -5   18.50    3.80
   2   4  -5   24.90    4.20
  -2  -4  -5   22.50    4.10
  -2   4   5   16.40    3.50
   4   2   5   18.90    3.80
   2  -4   5   22.40    4.20
   2  -4   5   19.10    3.60
  -4  -2   5   14.40    3.70
  -4  -2   5   20.80    3.60
  -4   2  -5   17.80    4.40
  -4   2  -5   20.80    4.30
   4   2   5   15.40    3.90
   4  -2  -5   28.30    4.30
  -4   2  -5   21.80    3.10
  -2  -4  -5   24.90    4.20
  -4  -2   5   15.40    3.20
   4   2  -5   20.30    4.40
  -2  -4   5   22.90    3.90
  -2   4  -5   17.30    4.20
   2  -4  -5   17.60    3.10
   2   4   5   19.20    2.90
   2  -4  -5   22.80    4.80
  -4  -2  -5   19.20    3.70
   2   4   5   15.30    3.80
  -2  -4   5   24.10    2.60
  -4   2   5   24.80    4.20
   4  -2   5   15.30    4.20
   2   4   5   17.10    3.70
  -4  -2  -5   25.90    4.50
  -4  -2  -5   27.10    4.60
   4  -2   5   27.20    4.70
  -2  -4   5   18.70    3.60
   4   2  -5   18.10    3.70
   4  -2   5   23.80    3.20
   4   2  -5   25.60    3.70
  -4   2   5   19.30    3.80
  -4   2   5   20.30    4.50
  -3  -4  -5 2115.69   92.69
   4   3   5 2168.38   94.69
  -4  -3   5 2222.58   93.49
  -4   3  -5 2124.19   92.59
  -3   4   5 2236.48   95.99
  -4  -3   5 2234.18   93.39
  -4   3  -5 2175.88   96.29
  -4  -3   5 1996.10   94.69
  -3  -4  -5 2084.39   94.99
   3  -4   5 2057.49   94.49
   3   4  -5 2246.28   94.29
  -3  -4   5 2084.29   92.19
   3   4   5 2073.99   94.49
  -3  -4   5 2171.28   92.39
  -4  -3  -5 2091.79   95.09
   4  -3   5 2061.39   94.79
   3   4   5 2004.00   95.09
  -3   4  -5 2144.19   95.79
  -4  -4  -5    0.10    2.00
   4  -4  -5   -1.90    3.70
  -4  -4   5    1.30    1.90
   4   4   5    0.60    3.30
   4  -4  -5    3.80    2.80
   4  -4   5    1.60    1.20
  -4   4   5    3.20    2.60
   4   4  -5   -1.50    3.60
  -4  -4   5    0.70    3.40
   4  -4  -5    3.40    3.10
  -4  -4  -5    2.20    3.60
   4   4  -5    0.10    3.00
  -4   4   5   -0.90    3.10
   4   4   5   -0.40    2.20
   4  -4   5    4.20    4.50
  -4  -4   5    1.20    3.10
  -4   4   5   -3.10    3.30
  -4  -4  -5   -0.80    3.00
   4  -4   5    0.80    3.30
  -4  -4   5    0.40    1.90
  -4   4  -5   -2.50    3.30
   4   4   5    3.40    4.20
  -4   4  -5    0.50    3.60
   0   5  -5 4596.04  211.98
   5   0   5 4373.56  214.48
   5   0  -5 4410.16  209.58
   0  -5   5 4320.87  202.58
  -5   0  -5 4375.46  213.88
   0   5   5 4661.43  213.38
  -5   0   5 4799.02  219.68
   0   5   5 4455.35  211.18
   5   0  -5 4785.42  220.18
  -5   0  -5 4352.16  214.08
   5   0   5 4497.75  223.48
   0   5  -5 4293.17  204.18
   0   5  -5 4416.86  212.48
  -5   0   5 4291.87  210.48
   0   5   5 4597.74  212.98
   0  -5  -5 4483.05  211.88
  -1   5   5  204.08   13.00
   1   5  -5  198.48   11.00
  -5  -1   5  194.68   13.20
   5   1   5  220.38   13.90
  -1  -5  -5  214.98   13.00
   5   1   5  198.28   13.40
  -1   5   5  208.08   12.10
   1   5  -5  209.38   12.10
  -1   5   5  220.28   12.30
   1  -5   5  201.38   12.40
  -1   5   5  216.08   13.30
   1   5  -5  214.48   12.90
   5   1   5  195.08   13.10
  -5   1  -5  203.68   13.30
  -1  -5  -5  224.48   12.80
  -1   5   5  212.98   13.00
   5  -1  -5  213.98   13.20
   1  -5   5  209.48   10.20
  -5  -1   5  207.88   13.10
  -5   1  -5  214.38   14.30
   5  -1  -5  204.58   14.30
   5  -1  -5  193.78   12.30
  -5   1  -5  207.28   12.50
  -5  -1   5  208.68   14.80
  -1  -5   5  237.48   13.20
  -1   5  -5  243.88   13.50
   5   1  -5  227.48   13.80
   5  -1   5  222.48   13.40
   5  -1   5  227.58   14.60
   1   5   5  227.88   11.70
  -1   5  -5  224.88   13.00
   1   5   5  219.88   13.20
  -5  -1  -5  212.88   13.30
   1   5   5  214.78   11.80
   1  -5  -5  215.18   13.00
  -5  -1  -5  230.28   13.70
  -5   1   5  221.48   14.10
  -1   5  -5  243.78   13.40
  -5   1   5  207.18   13.10
   5  -1   5  216.28   12.60
  -1  -5   5  217.78   11.80
  -1   5  -5  218.58   10.40
   1   5   5  241.48   13.40
  -1  -5   5  220.68   11.10
   5   1  -5  224.08   12.70
  -5  -1  -5  235.18   13.60
   5   1  -5  211.68   13.70
  -5   2  -5   31.00    6.40
  -2   5   5   12.60    3.20
  -2  -5  -5   10.10    3.80
   2   5  -5   11.90    3.70
   5  -2  -5    6.60    4.60
   2   5  -5   11.80    1.90
  -2   5   5    6.60    3.80
  -5  -2   5   12.20    3.60
  -5   2  -5   11.40    4.00
  -2  -5  -5    5.20    3.20
   2  -5   5    7.40    3.50
  -5  -2   5    8.50    3.40
   5   2   5   11.80    4.60
  -2   5   5    9.10    3.70
  -5  -2   5   17.50    4.70
   5  -2  -5   11.70    4.40
   5   2   5   10.10    3.90
   5   2   5    6.70    3.60
  -5   2  -5    5.80    2.70
   2   5  -5   10.20    3.50
  -2   5   5   10.10    3.90
   5  -2  -5   13.20    3.70
  -2   5   5   11.70    3.20
   2   5   5   11.40    3.80
  -5   2   5    4.80    3.10
  -5  -2  -5    7.20    3.90
   5   2  -5   12.20    3.40
   5  -2   5   14.40    4.20
  -5   2   5    8.80    3.50
   2   5   5    8.90    2.50
   5  -2   5    2.60    4.00
   5   2  -5    4.40    3.80
  -2   5  -5   11.70    4.20
   5   2  -5    8.40    3.60
  -2  -5   5   13.60    1.90
  -5   2   5    9.90    4.70
  -2  -5   5    9.10    3.50
  -5  -2  -5    9.20    4.00
   2   5   5   10.90    2.50
   5  -2   5   13.40    3.30
  -2   5  -5    8.50    3.90
  -5  -2  -5    9.50    4.20
  -2  -5   5   11.70    3.30
   2   5   5   10.30    3.70
   5  -3  -5   92.49   10.60
  -5   3  -5   69.29    5.40
   5   3   5   78.99    8.00
   3  -5   5   63.99    8.00
  -5   3  -5   74.69    9.40
  -3   5   5   59.09    7.50
  -3  -5  -5   65.99    7.30
   5   3   5   69.09    6.80
   3   5  -5   72.39    7.10
  -5   3  -5   65.69    7.30
   5   3   5   76.99    8.60
  -5  -3   5   62.59    7.50
   3  -5   5   74.29    7.60
  -3   5   5   70.79    6.00
   3   5  -5   73.39    7.90
  -3   5   5   61.29    7.00
  -5  -3   5   76.19    6.50
  -5  -3   5   66.99    7.00
   5  -3  -5   64.39    7.10
  -3  -5  -5   60.69    7.30
   5  -3  -5   65.49    6.70
  -5  -3  -5   46.20    6.60
  -3  -5   5   60.79    6.70
   3   5   5   64.49    8.00
   5   3  -5   75.39    7.00
  -3  -5   5   66.39    3.50
   3  -5  -5   49.99    7.30
   5   3  -5   83.79    9.30
   3   5   5   55.59    4.80
  -5   3   5   55.09    7.60
  -3  -5   5   61.99    3.50
   5  -3   5   56.79    7.00
  -5  -3  -5   50.99    6.50
  -5   3   5   50.09    6.40
  -3  -5   5   68.39    7.20
   5   3  -5   55.29    6.30
  -5  -3  -5   59.19    6.20
   3  -5  -5   66.89    5.80
  -3   5  -5   59.29    7.60
   5  -3   5   41.70    7.10
  -5   3   5   52.39    6.10
   5  -3   5   59.89    5.20
   3   5   5   73.49    7.90
  -3   5  -5   72.39    8.30
   4   5  -5  320.47   17.90
   4   5  -5  331.27   19.20
  -5  -4   5  321.47   18.80
   5  -4  -5  311.77   20.30
  -5   4  -5  324.17   19.00
  -5   4  -5  321.57   20.20
  -5  -4   5  325.57   16.30
   4  -5   5  336.17   19.90
   5  -4  -5  329.17   17.20
  -4  -5  -5  298.87   18.20
  -4   5   5  305.37   16.70
  -5  -4   5  321.97   18.20
   5   4   5  348.57   20.00
  -4  -5  -5  327.77   19.00
   5  -4  -5  314.07   18.00
   4  -5   5  324.17   18.60
  -5   4  -5  334.37   15.50
  -4  -5  -5  322.97   15.50
  -5  -4   5  347.97   16.50
  -4   5   5  329.87   18.90
  -4   5   5  364.96   20.40
   5   4   5  308.27   18.30
   5   4   5  321.07   17.00
  -5  -4  -5  310.97   16.50
  -4  -5   5  325.17   14.70
  -5  -4  -5  283.57   18.30
  -4   5  -5  327.17   19.10
  -4  -5   5  315.87   14.60
  -4  -5   5  301.07   18.20
  -5  -4  -5  292.67   18.70
   4   5   5  354.96   19.70
   4   5   5  317.17   18.50
   4  -5  -5  313.37   18.10
  -5   4   5  291.97   17.10
  -5   4   5  344.17   20.50
   5   4  -5  343.47   19.90
   5  -4   5  309.97   15.30
   5  -4   5  322.47   18.80
   4   5   5  284.87   15.70
  -4  -5   5  316.97   18.20
   5   4  -5  337.37   18.10
   4  -5  -5  343.47   20.30
   4  -5  -5  319.37   16.60
   5  -4   5  308.27   20.00
  -5   4   5  331.67   18.70
  -4   5  -5  326.47   20.10
  -5   5  -5   39.30    7.30
   5   5   5   37.60    4.60
  -5  -5  -5   21.20    5.80
  -5  -5   5   35.30    3.60
   5  -5  -5   38.00    5.20
  -5  -5  -5   35.70    4.10
   5  -5   5   35.40    9.00
  -5   5   5   58.19    9.30
  -5   5   5   36.60    6.90
   5   5  -5   31.50    6.00
  -5  -5   5   34.00    6.10
   5  -5   5   27.10    6.70
  -5  -5   5   31.20    6.00
   5  -5  -5   22.10    5.20
  -5  -5   5   30.30    3.40
   5   5   5   40.60    7.60
   5   5   5   44.20    8.50
   5  -5  -5   36.10    7.80
  -5  -5  -5   18.80    8.10
   5   5  -5   28.60    6.70
  -5   5  -5   41.90    8.20
   6   0   5 1388.66   67.09
   6   0  -5 1508.45   66.89
   0   6   5 1450.75   65.29
   0   6   5 1448.06   65.09
   6   0   5 1454.65   66.19
   0  -6   5 1400.26   64.29
  -6   0   5 1372.76   66.29
   0   6  -5 1452.75   66.19
   6   0   5 1452.75   66.49
   0   6   5 1461.95   65.19
   0   6  -5 1404.96   63.89
   6   0  -5 1405.26   67.29
   0   6  -5 1478.25   66.09
   6   0  -5 1455.95   65.59
  -6   0  -5 1405.56   65.89
  -6   0   5 1453.85   65.89
   0  -6  -5 1429.16   65.99
   0   6   5 1431.76   65.39
  -6   0  -5 1396.16   66.29
   0   6   5 1499.25   66.39
   0   6  -5 1432.26   64.59
  -6   0   5 1485.65   67.09
  -6   0  -5 1518.15   67.39
   0  -6   5 1443.26   63.79
  -6  -1   5 2132.89  100.09
  -6   1  -5 2230.48   99.29
  -1  -6  -5 2298.17   99.29
  -1   6   5 2181.78   98.59
   1  -6   5 2260.27   96.49
   6   1   5 2353.16  100.49
  -6  -1   5 2402.56  100.59
   1   6  -5 2335.27   99.69
   1   6  -5 2181.98   97.29
   1   6  -5 2129.89   98.39
   6  -1  -5 2296.87   99.39
  -6  -1   5 2216.98   99.59
  -1   6   5 2269.97   99.59
  -6   1  -5 2192.48  100.09
   6   1   5 2109.59  100.29
  -6   1  -5 2315.97  101.59
   1  -6   5 2123.89   98.79
   6  -1  -5 2228.38  101.59
  -1   6   5 2280.47  100.09
   6   1   5 2271.47  100.29
  -1  -6  -5 2236.18   99.79
  -6  -1  -5 2120.49   99.89
  -6   1   5 2215.88   99.69
   6   1  -5 2262.97   99.39
   1   6   5 2307.47   99.99
  -6  -1  -5 2257.77  100.19
  -6   1   5 2240.28   99.89
  -1   6  -5 2359.86   99.99
   6   1  -5 2242.98  100.69
  -1  -6   5 2249.87   97.19
   1  -6  -5 2260.77   99.49
  -1  -6   5 2203.98   98.09
   6  -1   5 2188.78  100.19
  -1   6  -5 2077.09   96.49
  -1  -6   5 2150.18   99.59
   6  -1   5 2205.68   99.29
   1   6   5 2149.88   97.69
   6  -1   5 2122.19  101.19
  -6   1   5 2274.07  101.29
   1   6   5 2203.38   97.99
  -6  -1  -5 2316.77  100.49
  -1   6  -5 2176.58   99.19
  -1   6  -5 2312.17  100.19
  -6   2  -5   86.09    9.20
  -2   6   5   88.29    9.00
   6   2   5   85.79    9.00
  -2  -6  -5   65.79    7.20
  -2   6   5   72.29    8.20
   6  -2  -5   77.29   10.00
  -2   6   5   85.79    9.20
   2  -6   5   77.99    8.20
   6   2   5   75.39    8.20
   2   6  -5   78.59    7.80
  -6  -2   5   79.39    9.00
   2   6  -5   77.09    7.80
   6  -2  -5   63.79    7.20
  -6   2  -5   64.29    8.70
  -6   2  -5   85.69    7.20
  -2   6   5   70.29    6.60
  -2   6   5   72.79    6.60
  -2  -6  -5   66.19    7.40
  -6  -2   5   80.39    8.00
   6   2   5   84.49    9.60
  -6  -2   5   61.19    7.40
   6  -2  -5   73.39    7.90
  -2   6  -5   71.39    8.50
  -6   2   5   63.99    8.70
  -6   2   5   68.79    7.80
  -6  -2  -5   52.79    7.20
   6  -2   5   68.09    8.50
   6  -2   5   64.19    6.80
   2  -6  -5   61.19    7.60
  -2  -6   5   67.39    7.80
   2   6   5   81.29    8.60
   2   6   5   60.59    5.10
   2   6   5   60.69    7.60
  -6  -2  -5   63.79    8.00
   2   6   5   61.49    5.40
  -2  -6   5   72.89    7.00
  -2   6  -5   74.59    8.40
   6   2  -5   65.59    7.20
  -6  -2  -5   71.59    7.80
  -6   2   5   72.09    7.70
   6  -2   5   54.89    8.30
  -2   6  -5   73.59    8.20
   6   2  -5   74.19    8.90
  -2  -6   5   65.59    3.90
   6   2  -5   74.69    8.40
   6   3   5   62.39    8.50
  -6  -3   5   69.29    8.70
  -3   6   5   66.29    6.40
  -3  -6  -5   66.99    8.20
  -6   3  -5  102.59   11.40
  -6   3  -5   76.09    6.50
  -3  -6  -5   64.39    8.20
   6  -3  -5   76.09    8.10
  -3   6   5   59.19    7.90
   6   3   5   79.39    9.00
   3   6  -5   72.89    8.10
   6  -3  -5   76.09    7.70
   6  -3  -5   74.09   10.20
  -3   6   5   85.59    9.80
   6   3   5   62.09    8.60
  -6   3  -5   78.89    9.30
   3  -6   5   84.79    9.00
  -6  -3   5   90.09    9.00
  -3   6   5   70.79    6.70
   3   6  -5   69.79    8.10
   3  -6   5   65.99    8.40
  -3   6   5   65.19    8.00
  -6  -3   5   75.89    7.50
   6  -3   5   60.19    6.30
   3   6   5   59.49    7.60
  -6   3   5   61.59    7.80
  -6  -3  -5   68.59    7.40
   3   6   5   66.19    8.40
  -3  -6   5   63.59    7.10
  -6  -3  -5   62.99    8.30
   6   3  -5   66.19    7.60
  -6   3   5   80.39   10.30
   6   3  -5   81.59    8.40
   3  -6  -5   62.59    8.60
   3   6   5   64.89    4.90
  -3   6  -5   67.99    8.50
   3   6   5   65.39    4.80
  -3  -6   5   65.69    7.80
  -6  -3  -5   61.69    8.50
   6   3  -5   54.19    8.40
  -6   3   5   58.89    6.90
   6  -3   5   61.29    7.90
   6  -3   5   74.19   10.30
  -3   6  -5   81.79    9.60
   4  -6   5  414.46   23.60
   6   4   5  420.16   22.40
  -4  -6  -5  427.16   23.80
  -6  -4   5  441.46   21.70
  -4  -6  -5  433.86   24.20
  -6   4  -5  449.76   26.10
   6  -4  -5  427.16   26.00
  -6   4  -5  426.86   24.30
   4   6  -5  432.66   24.30
  -6  -4   5  403.26   24.00
   6  -4  -5  454.55   22.50
   4  -6   5  441.16   24.80
   6  -4  -5  413.56   23.20
   6   4   5  447.86   25.20
  -4   6   5  409.16   21.30
  -6   4  -5  434.26   20.90
  -6  -4   5  428.06   23.60
   4   6  -5  454.25   23.50
  -4   6   5  471.55   25.60
   6   4   5  447.86   24.00
  -4   6   5  428.46   24.20
  -4  -6   5  410.56   23.20
   4   6   5  431.96   23.80
   6  -4   5  448.86   20.80
  -6   4   5  423.76   22.40
   6   4  -5  409.46   22.10
  -6   4   5  448.96   25.80
   6   4  -5  382.86   24.60
  -4   6  -5  419.26   24.40
   4  -6  -5  423.46   25.10
   6  -4   5  431.86   25.90
   6   4  -5  461.15   23.40
  -6  -4  -5  413.46   24.20
  -4  -6   5  413.76   23.40
  -6  -4  -5  433.36   21.90
   4   6   5  409.76   19.70
   4   6   5  445.16   24.80
  -6  -4  -5  423.76   24.00
   6  -4   5  419.36   24.00
  -4   6  -5  464.35   25.60
  -6   4   5  424.66   23.80
   4   6   5  419.86   19.70
   6   5   5   15.90    6.00
   6  -5  -5   14.30    5.10
  -5   6   5   15.00    6.30
  -6   5  -5   17.00    2.70
   5  -6   5   18.30    7.00
  -5  -6  -5   11.90    6.10
  -5   6   5   16.20    4.40
   6  -5  -5   21.80    4.90
   5   6  -5   16.90    5.40
  -6   5  -5   21.50    6.50
   5  -6   5   22.70    6.00
   6   5   5   16.40    6.70
  -6  -5   5   18.90    5.70
  -5  -6  -5   23.90    6.80
  -5   6   5   13.10    6.10
   6  -5  -5   13.80    6.90
  -6  -5   5   21.20    6.30
  -6  -5   5   20.90    3.70
  -6  -5   5   18.30    3.50
  -6   5  -5   20.00    7.00
   6   5   5   18.40    4.30
   5   6  -5   22.90    7.20
  -5  -6  -5   19.90    2.70
   5  -6  -5   15.60    5.20
  -6  -5  -5   13.70    6.10
  -6   5   5   14.30    4.20
   6   5  -5    9.20    5.40
  -6   5   5   14.30    5.90
  -5   6  -5    6.10    6.50
  -6  -5  -5    8.70    5.10
   6  -5   5    8.50    6.90
   5  -6  -5   13.10    3.90
   5   6   5   13.60    5.70
   6  -5   5    9.20    5.30
  -5   6  -5   17.40    6.70
   6   5  -5   11.70    6.50
   5   6   5   12.90    2.80
  -6  -5  -5   11.50    3.60
   5  -6  -5   19.10    7.10
   6  -5   5   14.70    2.60
  -5  -6   5   12.30    6.00
  -6   5   5   12.40    6.20
  -5  -6   5    8.80    4.80
   5   6   5   12.70    6.30
  -6  -6   5   84.59   10.70
   6  -6   5   93.69   12.50
  -6  -6  -5  107.39    6.70
   6  -6  -5   84.89   11.90
   6  -6  -5  103.59    9.70
   6   6   5   90.29    7.10
  -6   6   5   88.19    8.10
  -6   6  -5   80.29   10.60
  -6   6   5   95.69   11.00
   6   6  -5  114.99   11.00
   6   6  -5  113.59   13.10
   6  -6  -5   85.99   14.30
  -6  -6  -5   82.39   10.60
  -7   0  -5  416.96   23.80
  -7   0  -5  388.86   22.30
   7   0   5  385.06   22.70
   0   7   5  411.56   22.70
   0   7  -5  425.76   22.70
   0  -7   5  408.56   19.70
   0  -7   5  388.36   20.20
   7   0  -5  409.76   22.00
   0   7   5  398.16   21.10
   0   7   5  395.66   21.00
   0   7  -5  390.86   19.90
   0   7  -5  391.86   20.50
  -7   0  -5  415.56   23.00
   7   0  -5  393.66   23.10
   0   7  -5  415.16   22.90
  -7   0   5  396.36   22.70
   0   7   5  422.76   21.80
  -7   0   5  403.16   22.40
   7   0   5  394.36   23.90
   0   7   5  413.36   21.50
  -7   0   5  414.26   23.60
   7   0  -5  390.76   24.00
  -1   7   5  395.16   21.40
  -7  -1   5  368.06   21.10
   7  -1  -5  387.16   21.60
   7   1   5  376.26   21.90
  -7  -1   5  329.27   21.20
  -1   7   5  356.16   19.60
   1   7  -5  369.16   19.60
   1   7  -5  393.96   21.30
   7  -1  -5  345.67   22.90
   1  -7   5  375.26   17.30
   1  -7   5  356.46   19.80
  -1   7   5  364.66   21.80
  -7   1  -5  352.26   21.60
  -1   7   5  363.26   21.40
  -7  -1   5  395.06   21.90
   7   1   5  363.86   22.30
   1   7  -5  357.66   18.00
  -1  -7  -5  361.96   21.10
  -7   1  -5  346.57   20.50
   7  -1  -5  360.46   20.70
  -1   7   5  363.16   20.60
  -7   1  -5  412.06   23.40
  -1  -7  -5  352.76   20.00
   7   1   5  343.57   21.90
   1   7   5  383.46   20.90
  -7   1   5  372.06   21.30
  -1   7  -5  348.37   17.40
  -1   7  -5  385.16   21.70
  -1  -7   5  395.16   18.10
   1   7   5  389.26   19.00
  -1   7  -5  392.76   21.60
  -1  -7   5  370.46   19.20
  -7  -1  -5  396.36   21.90
   7  -1   5  367.76   20.80
   7  -1   5  368.06   22.90
  -7  -1  -5  359.16   21.30
  -7   1   5  407.16   23.00
   7   1  -5  359.36   22.20
   7  -1   5  379.76   23.20
   1   7   5  365.76   18.70
   1  -7  -5  418.86   21.10
  -1   7  -5  356.86   20.20
   7   1  -5  389.76   22.50
  -7  -1  -5  408.46   22.30
  -7   1   5  357.66   21.00
   7   1  -5  389.16   20.90
  -2   7   5  940.91   45.10
  -2   7   5  901.71   42.80
  -2   7   5  962.60   45.50
   2  -7   5  917.71   44.10
  -2  -7  -5  916.91   44.70
  -7  -2   5  909.91   45.30
  -2   7   5  900.51   47.40
  -7  -2   5  991.40   44.80
  -7   2  -5  923.01   46.90
   7   2   5  913.71   45.00
   7   2   5  916.31   45.70
  -7   2  -5  926.21   45.40
  -7   2  -5  887.81   43.50
   7  -2  -5  913.51   46.90
  -2  -7  -5  925.31   44.20
  -2   7   5  898.81   42.90
  -7  -2   5  939.21   44.70
   2   7  -5  918.41   43.90
   2   7  -5  947.21   44.80
   7   2   5  859.11   44.80
   7  -2  -5  953.40   44.50
   7  -2  -5  890.01   44.20
   7  -2   5  930.91   43.60
   7   2  -5  920.31   45.20
  -7  -2  -5  952.80   44.80
  -2   7  -5  968.10   44.90
   7  -2   5  892.21   46.70
  -2  -7   5  911.71   43.20
  -2   7  -5  918.71   44.90
  -2  -7   5  848.32   44.20
   2  -7  -5  933.01   44.70
   2   7   5  939.21   44.90
  -2   7  -5  948.81   45.40
   2   7   5  892.91   41.20
   2   7   5  854.41   44.40
   2   7   5  860.61   41.00
   7   2  -5 1036.90   46.60
   7   2  -5  930.61   44.30
  -7   2   5  865.11   44.20
   7  -2   5  918.61   45.20
  -7   2   5  981.00   46.90
  -7  -2  -5  916.61   45.10
  -7   2   5  924.21   44.80
   7   3   5  589.24   31.20
  -7  -3   5  666.63   30.90
   7   3   5  638.74   33.20
  -3   7   5  632.24   29.40
  -3   7   5  630.14   32.60
  -7  -3   5  551.84   31.80
  -7  -3   5  590.14   31.40
   7   3   5  613.54   31.80
  -3   7   5  600.94   29.00
   3   7  -5  618.84   31.50
   3   7  -5  640.24   31.60
   7  -3  -5  571.14   32.70
   7  -3  -5  585.64   30.50
  -3  -7  -5  593.64   31.40
   7  -3  -5  540.25   33.40
  -3  -7  -5  570.14   31.10
  -7   3  -5  563.54   31.90
  -3   7   5  642.14   32.50
  -3   7   5  623.54   32.10
  -7   3  -5  618.34   29.70
   3  -7   5  584.04   31.50
  -7   3  -5  650.23   34.30
   3   7   5  616.54   32.00
  -7   3   5  560.24   30.40
   7   3  -5  592.34   31.20
   3  -7  -5  642.04   32.60
   7   3  -5  624.34   33.10
  -7  -3  -5  625.54   32.40
  -7  -3  -5  603.44   30.70
  -7  -3  -5  613.84   32.00
   7  -3   5  603.64   32.00
  -3   7  -5  622.94   32.40
   7  -3   5  580.74   33.60
   3   7   5  622.44   31.70
  -3   7  -5  585.94   32.10
  -3  -7   5  570.04   31.20
   7   3  -5  598.64   31.00
  -7   3   5  638.84   33.80
  -7   3   5  612.64   31.80
  -3   7  -5  579.34   31.60
  -3  -7   5  585.04   30.40
  -4  -7  -5   23.60    6.30
   7   4   5   15.20    6.70
  -4   7   5   25.70    4.40
  -4   7   5   25.00    7.10
  -7   4  -5   31.40    7.80
   4   7  -5   26.70    6.80
   4  -7   5   22.60    6.10
   7   4   5   19.80    5.40
   7  -4  -5   21.30    5.70
  -4   7   5   21.10    6.60
   7  -4  -5   24.30    5.40
   4  -7   5   21.00    6.60
   4   7  -5   16.10    5.70
  -4  -7  -5   17.20    5.90
  -7  -4   5   24.90    5.30
  -7  -4   5   22.50    6.30
   7  -4  -5   21.60    7.70
  -7   4  -5   25.00    4.50
  -7   4  -5   26.50   10.40
  -4   7   5   25.70    4.50
  -7  -4   5   13.90    7.10
  -7  -4  -5   20.80    8.60
   4   7   5   28.80    7.00
  -4  -7   5   28.90    6.70
   7   4  -5   37.30    7.10
   7   4  -5   33.90    7.80
  -7   4   5   24.00    5.50
  -4  -7   5   21.60    5.50
   4   7   5   35.40   10.10
   7   4  -5   27.60    6.50
  -7  -4  -5   20.20    6.10
   7  -4   5   23.40    4.40
  -4   7  -5   31.10    7.70
   7  -4   5   37.00    8.70
  -4   7  -5   23.10    7.10
  -7  -4  -5   23.00    5.20
   4  -7  -5   29.20    7.80
  -7   4   5   31.40    7.00
   5  -7   5  141.19   14.60
  -5   7   5  176.58   15.60
   7   5   5  154.08   11.60
   7   5   5  149.39   15.50
  -7  -5   5  185.38   10.90
  -7  -5   5  158.98   10.40
   5   7  -5  156.08   14.80
  -7   5  -5  160.38   14.80
  -5   7   5  161.28   14.80
   7  -5  -5  163.08   11.80
   7  -5  -5  156.78   16.10
  -5  -7  -5  162.38   14.10
  -7  -5   5  147.19   13.60
  -7   5  -5  154.38    9.60
  -5   7   5  151.38   10.60
  -5   7   5  152.88   10.30
  -7   5   5  171.68   14.50
   5   7   5  180.68   15.40
  -5  -7   5  152.08   13.00
  -5  -7   5  165.48   13.90
  -7   5   5  138.69   11.30
   7  -5   5  159.58   16.20
  -7  -5  -5  142.39   14.00
   7   5  -5  179.88   13.70
   7  -5   5  175.68    9.60
   7   5  -5  161.18   15.50
   5  -7  -5  156.48   15.40
  -5   7  -5  173.38   15.60
  -5   7  -5  165.08   14.90
  -6  -7  -5  233.08   17.90
   6   7  -5  246.68   19.50
  -7  -6   5  244.08   12.40
   7  -6  -5  229.08   20.30
   6  -7   5  209.48   19.00
  -6   7   5  260.67   18.80
  -7  -6   5  261.57   12.50
  -7   6  -5  237.68   18.80
  -6   7   5  225.98   14.00
  -7  -6   5  247.38   18.10
   7  -6  -5  265.57   15.20
   7   6   5  269.07   20.40
   7   6   5  231.18   14.00
  -7   6   5  222.88   14.70
   7  -6   5  217.18   19.90
   7   6  -5  267.27   20.30
   6   7   5  260.97   20.00
   6  -7  -5  260.47   20.40
  -7  -6  -5  238.78   18.10
   6  -7  -5  277.57   14.50
  -6  -7   5  255.77   18.00
  -7   6   5  250.67   18.50
  -6   7  -5  264.87   19.50
  -7  -6  -5  257.77   13.40
   7   7  -5  192.88   18.70
   7  -7  -5  227.98   13.70
  -7   7   5  187.28   12.60
   7  -7   5  207.88   19.50
  -7   7  -5  195.28   17.80
  -7   7   5  209.78   17.80
  -7  -7   5  215.18   17.40
  -7  -7  -5  195.38   17.10
   7   7   5  203.88   19.10
   7  -7  -5  216.28   19.80
   8   0   5   39.30    8.50
   8   0  -5   37.40    7.90
   0   8  -5   29.40    6.90
  -8   0   5   25.10    6.80
   0  -8   5   35.00    4.50
  -8   0  -5   31.80    7.40
   0   8   5   34.90    6.20
   8   0   5   47.50    8.00
  -8   0   5   34.90    7.10
  -8   0  -5   35.10    7.30
   0   8   5   18.90    6.80
   0   8   5   43.30    6.60
   0   8   5   42.50    7.60
   0   8  -5   33.50    5.10
   0  -8   5   32.40    5.10
   0   8  -5   31.30    4.70
  -8   0   5   35.40    7.00
   8   0  -5   38.70    6.90
   0   8   5   34.40    5.70
   8   0  -5   25.60    7.50
  -8   0  -5   46.90    8.60
   0   8  -5   40.70    7.70
   1   8  -5   92.69   10.90
   8  -1  -5   84.59   11.80
  -1   8   5   83.99   10.90
  -1  -8  -5   88.59   10.10
  -8  -1   5   76.49    9.60
  -1   8   5   92.49    9.70
   1   8  -5   84.99    8.30
  -8  -1   5   71.99    9.80
   8  -1  -5  112.59   11.00
   8  -1  -5   88.09   10.70
  -1   8   5   81.19   10.00
   1   8  -5   79.49    6.20
   1   8  -5   85.09    9.90
  -8   1  -5   82.99   11.50
  -1  -8  -5   73.49    8.30
  -1   8   5   82.89    8.40
  -8   1  -5   97.49    9.90
  -8  -1   5   63.39    9.10
   8   1   5   82.99   10.40
   8   1   5   75.29   10.30
   1  -8   5   79.29    8.60
  -1   8   5   82.89    8.40
  -8   1  -5   72.09    9.90
  -1   8  -5   99.89   11.40
  -8   1   5   95.69   10.80
   8  -1   5  108.19   10.70
   8   1  -5   92.19   11.70
  -1   8  -5   83.79    9.00
   1  -8  -5   91.89    9.40
  -8  -1  -5   74.09    9.50
   1   8   5   96.09    7.50
  -8  -1  -5   74.59    9.70
  -1   8  -5   86.49    5.80
  -8   1   5   85.09   11.00
  -1  -8   5   95.59    6.40
  -1  -8   5   82.99    7.60
  -8   1   5   86.29    9.60
  -8  -1  -5   85.59   10.70
   8   1  -5  109.49   11.00
   1   8   5  102.99   10.10
   8  -1   5   83.09   11.80
  -1   8  -5   96.79   10.70
   1   8   5   76.29    7.00
   8   1  -5   68.79   10.00
   1   8   5   85.89   10.00
   2   8  -5  716.93   35.60
   8  -2  -5  662.23   35.00
   2  -8   5  716.73   34.90
  -2   8   5  713.03   35.70
   8   2   5  696.83   37.00
  -8  -2   5  752.22   35.90
   8  -2  -5  671.53   35.10
   8   2   5  660.33   36.00
   2   8  -5  692.63   34.50
  -8   2  -5  689.03   34.50
  -2  -8  -5  661.23   35.50
  -2   8   5  739.03   36.70
  -2   8   5  716.43   35.00
  -8  -2   5  713.93   35.80
   8  -2  -5  652.53   38.00
  -2  -8  -5  685.33   34.60
  -8   2  -5  719.03   36.50
  -2   8   5  661.63   33.00
   2   8   5  668.83   35.30
  -2  -8   5  644.64   33.40
  -8   2   5  702.13   40.40
   8   2  -5  735.53   37.50
  -8  -2  -5  734.93   36.00
   2  -8  -5  695.63   35.30
  -8  -2  -5  645.04   35.90
  -8   2   5  712.03   35.90
  -8  -2  -5  623.44   35.70
  -8   2   5  620.34   34.80
   2   8   5  654.73   30.90
   8   2  -5  702.63   36.40
   8   2  -5  694.63   35.20
  -2   8  -5  677.83   35.10
   8  -2   5  705.43   34.50
   8  -2   5  634.44   37.60
  -2   8  -5  712.33   36.50
   2   8   5  645.64   30.80
  -2  -8   5  698.83   35.70
   3   8  -5  330.07   20.50
  -8   3  -5  334.17   19.10
  -8   3  -5  336.87   21.80
  -3  -8  -5  326.97   21.10
   8   3   5  313.37   20.70
   8   3   5  405.16   32.40
  -3   8   5  331.27   18.00
  -8  -3   5  346.47   21.20
  -3   8   5  324.67   18.10
  -3   8   5  346.17   21.70
   3  -8   5  353.16   21.10
  -3  -8  -5  345.27   20.40
   8  -3  -5  321.57   23.80
   8  -3  -5  337.67   20.10
   8  -3  -5  330.07   20.40
  -8  -3   5  360.96   20.40
   3   8   5  317.87   21.30
  -8   3   5  325.27   20.00
   8   3  -5  360.66   23.10
   8   3  -5  338.27   21.10
  -3   8  -5  333.77   21.40
  -8   3   5  320.07   21.10
   8  -3   5  336.67   19.00
   3  -8  -5  348.37   21.60
   8  -3   5  307.07   23.20
  -8  -3  -5  306.57   21.20
  -8  -3  -5  330.27   20.10
  -3  -8   5  344.67   19.60
   8   3  -5  359.16   20.90
  -3  -8   5  318.37   20.80
  -3   8  -5  335.87   22.80
   8  -4  -5  305.67   22.40
  -4   8   5  280.97   15.20
   4  -8   5  263.87   19.00
  -4  -8  -5  261.07   21.40
  -8   4  -5  318.77   20.30
   8  -4  -5  290.67   17.40
  -4   8   5  301.97   20.10
  -4   8   5  293.87   20.20
  -4   8   5  254.97   14.60
  -8  -4   5  301.67   17.00
   4   8  -5  255.17   18.70
  -4  -8  -5  278.97   18.70
  -8   4  -5  259.37   15.60
   8   4   5  251.77   17.50
   8   4   5  278.27   20.60
  -8  -4   5  266.47   19.00
   8  -4   5  246.18   20.80
  -8   4   5  258.97   16.90
   8  -4   5  253.87   15.50
   4   8   5  276.97   19.70
   8   4  -5  263.07   17.60
  -4   8  -5  250.97   19.50
  -8  -4  -5  269.87   16.70
  -4   8  -5  263.47   19.60
  -4  -8   5  258.47   17.30
   8   4  -5  240.68   20.00
  -8  -4  -5  239.98   18.50
  -4  -8   5  228.48   18.00
   4  -8  -5  279.07   19.90
  -5   8   5   32.90    4.80
   8   5   5   26.80    6.50
  -5   8   5   36.00    5.30
  -8   5  -5   37.70    9.30
   8   5   5   26.70    9.00
   8  -5  -5   35.70   10.40
  -8  -5   5   29.40    5.80
  -8  -5   5   37.30    5.80
   8  -5  -5   39.50    6.70
  -8  -5   5   41.10    9.10
  -8   5  -5   33.90    5.20
  -5   8   5   30.70    8.40
  -5  -8  -5   33.50    8.50
  -8  -5  -5   30.50    8.20
   5   8   5   33.00    8.50
   5  -8  -5   32.00   10.70
  -8  -5  -5   40.50    6.00
  -5   8  -5   28.80    8.40
  -5  -8   5   27.30    7.90
   8  -5   5   43.10   10.10
   8  -5   5   38.20    5.30
  -8   5   5   30.40    6.10
   8   5  -5   50.59   10.90
  -8   5   5   38.60    8.70
  -8  -6   5  189.98   11.00
  -6   8   5  198.08   17.90
  -6   8   5  184.08   11.40
  -8  -6   5  198.48   11.30
  -8   6  -5  187.48   10.20
   8  -6  -5  195.08   13.50
   8   6   5  204.28   19.00
  -6   8   5  186.48   11.90
   8   6   5  187.88   12.70
  -6  -8  -5  180.88   16.40
  -8   6  -5  200.08   18.00
   6   8  -5  173.38   17.60
  -8  -6   5  185.48   16.70
   8  -6  -5  182.28   19.30
   6  -8   5  186.68   17.80
   8  -6   5  205.18   10.00
  -8  -6  -5  189.48   12.10
   6  -8  -5  182.98   18.20
   6   8   5  184.38   18.00
  -8   6   5  182.58   17.00
  -6   8  -5  187.98   17.80
   8   6  -5  183.58   18.50
  -8  -6  -5  173.68   16.70
   8  -6   5  185.58   19.80
  -6  -8   5  157.38   15.70
  -8   6   5  179.28   12.90
  -7   8   5   15.00    4.70
   7   8  -5   25.50    9.40
   8   7   5   17.60    9.50
  -7  -8  -5   15.10    8.60
  -8   7  -5   20.20    8.80
   8   7   5   15.20    3.10
   8  -7  -5   16.80   10.20
   8  -7  -5   15.10    5.10
  -7   8   5    8.50    8.10
   7  -8   5   19.60    9.40
  -8  -7   5    9.80    7.50
  -8  -7  -5   20.20    8.40
  -8   7   5   18.20    5.00
  -8  -7  -5   21.80    2.50
  -7   8  -5   22.70    9.30
   8   7  -5   26.00    9.50
  -7  -8   5   24.70    8.60
   7   8   5   25.10    9.60
   8  -7   5   18.30    9.60
  -8   7   5   17.10    8.30
   7  -8  -5   24.20   10.10
  -8   8  -5   45.80   15.00
   8  -8  -5   59.19   13.50
  -8  -8   5   54.39   11.10
   8  -8   5   60.79   13.10
  -8   8   5   80.09   13.40
   8   8  -5   58.39   12.80
  -8   8   5   66.29    6.80
   8   8   5   56.39   13.70
   0   9   5  238.58   19.30
   0   9  -5  265.77   18.90
   0   9   5  248.18   16.30
  -9   0  -5  233.98   17.50
   0  -9   5  257.67   14.50
   0  -9   5  256.37   13.60
   9   0  -5  240.68   19.90
   9   0   5  241.08   19.70
  -9   0  -5  245.38   18.50
  -9   0   5  251.97   19.60
   0   9   5  248.18   16.00
   0   9   5  258.37   15.50
   9   0   5  247.58   18.30
   0   9  -5  226.78   14.00
   0   9  -5  241.78   14.40
   0   9   5  270.57   19.20
   1   9  -5  560.84   29.70
  -9   1  -5  531.65   29.60
  -1   9   5  500.15   26.20
   1   9  -5  517.95   26.20
  -1   9   5  520.65   27.30
   1   9  -5  485.15   23.40
  -1   9   5  528.35   30.00
   1  -9   5  523.25   26.40
   9  -1  -5  485.85   28.70
  -9   1  -5  491.75   28.00
   9   1   5  498.45   30.00
   9  -1  -5  501.05   31.10
  -9  -1   5  532.85   29.50
  -1   9   5  512.65   26.40
   1   9   5  489.35   24.70
  -1   9  -5  457.95   23.10
   9  -1   5  521.95   28.40
   9   1  -5  522.45   30.40
  -1   9  -5  557.34   29.80
   1   9   5  476.35   24.40
  -1  -9   5  507.65   23.40
   9  -1   5  462.35   30.50
  -1   9  -5  503.85   26.80
  -9  -1  -5  491.55   29.20
  -9  -1  -5  509.15   29.60
   1   9   5  516.55   27.70
   9   1  -5  506.95   30.10
  -1   9  -5  472.55   23.10
  -1  -9   5  530.35   25.60
   2   9  -5  159.68   13.20
   9   2   5  164.48   16.30
   2  -9   5  169.38   13.50
  -2   9   5  145.59   11.50
  -2  -9  -5  154.58   14.90
   9  -2  -5  174.98   14.70
   9   2   5  169.08   15.90
  -2   9   5  169.98   14.30
  -2   9   5  166.68   16.10
   9  -2  -5  166.08   17.50
  -9  -2   5  176.28   14.90
  -9  -2   5  161.48   15.20
  -9   2  -5  172.98   15.80
  -9   2  -5  178.48   13.90
  -2  -9  -5  161.88   13.20
  -2   9   5  165.38   11.90
  -9  -2  -5  167.58   15.60
   9  -2   5  185.98   14.20
  -9  -2  -5  198.08   15.50
   2   9   5  168.08   14.70
  -9   2   5  171.08   15.20
  -2  -9   5  189.98   12.60
   2  -9  -5  180.78   14.50
   9  -2   5  178.48   18.60
  -2   9  -5  197.28   16.60
   9   2  -5  207.68   17.60
  -9   2   5  172.48   14.20
   9   2  -5  166.08   15.90
  -2   9  -5  186.68   14.40
   3  -9   5  274.47   19.00
  -3  -9  -5  288.47   20.00
  -9   3  -5  273.17   17.70
   9  -3  -5  274.47   22.90
  -3   9   5  300.17   21.20
   9   3   5  292.27   20.10
   3   9  -5  288.37   19.20
  -3   9   5  282.17   16.10
   9  -3  -5  310.87   19.10
  -3  -9  -5  279.67   18.80
  -9   3  -5  283.57   20.90
   9   3   5  314.87   22.30
  -9  -3   5  315.17   19.50
  -3   9   5  276.47   19.90
  -9  -3   5  286.77   20.20
   9   3  -5  289.57   22.00
  -3  -9   5  297.17   19.80
  -9   3   5  273.87   18.60
   9  -3   5  249.48   22.30
  -3  -9   5  265.17   19.90
   3  -9  -5  294.27   20.10
   3   9   5  272.07   20.00
  -9  -3  -5  283.07   20.50
   9  -3   5  293.57   18.00
  -9   3   5  291.27   20.40
   9   3  -5  281.37   20.00
  -3   9  -5  296.87   21.20
  -9   4  -5    7.70    7.30
   9  -4  -5    8.90    9.20
   9  -4  -5   21.20    6.40
  -4   9   5   16.60    4.00
  -4  -9  -5   13.40    7.30
  -4   9   5   17.50    8.00
  -9   4  -5   18.00    5.30
   4   9  -5   16.10    7.20
   9   4   5   19.20    7.10
  -9  -4   5   20.60    8.20
  -4   9   5   25.10    4.80
  -9  -4   5   16.50    6.00
   4  -9   5   19.20    7.10
   9   4   5   16.10    8.70
  -4   9  -5   17.00    7.30
   9   4  -5   11.60    8.00
   9  -4   5   13.10    9.00
   9  -4   5   16.00    5.40
  -9  -4  -5   12.30    5.80
  -9  -4  -5   11.20    7.20
   4   9   5   17.10    7.70
   9   4  -5   18.90    6.90
  -9   4   5   14.10    7.70
  -9   4   5   19.90    6.00
   4  -9  -5   15.90    7.30
  -4   9  -5   17.60    8.50
  -4  -9   5   12.10    7.20
  -4  -9   5   21.30    6.80
  -5   9   5  111.09   14.30
  -5  -9  -5   94.09   12.50
   9  -5  -5   89.29    9.90
  -9   5  -5   92.39   12.80
  -9  -5   5  101.59    9.80
  -9  -5   5   81.29   11.70
  -5   9   5   89.49    7.10
   9   5   5   88.09   10.50
   5   9  -5   85.99   12.30
   5  -9   5  101.39   13.00
   9   5   5   98.09   14.50
  -5   9   5   85.69    7.50
   9  -5  -5   89.69   14.90
  -9   5  -5   87.79    8.60
  -9  -5  -5   96.29    9.50
   5  -9  -5   85.89   13.30
   9   5  -5   78.29   12.70
  -9   5   5   74.39   10.30
   9  -5   5   92.09   14.50
  -5   9  -5  103.49   13.50
   9  -5   5  101.99    8.90
  -9   5   5   69.19   11.40
  -5  -9   5   90.59   11.90
   5   9   5   69.29   11.90
  -9  -5  -5   72.59   12.40
  -9  -6   5  115.29    9.30
  -6  -9  -5   84.09   12.60
   9   6   5  106.49   10.50
  -6   9   5  104.09    7.80
   6  -9   5   99.69   13.80
   9   6   5   96.99   14.80
  -6   9   5  134.79   16.20
   9  -6  -5  107.79   16.30
  -9  -6   5  100.89   13.20
   9  -6  -5  119.79   11.30
  -9   6  -5  120.09    8.10
  -9   6  -5  124.29   15.50
   6   9  -5  100.09   13.80
  -6   9   5   98.29    7.40
  -9  -6  -5   88.99   12.80
  -9  -6  -5  109.49    9.30
   6  -9  -5  120.49   15.70
  -9   6   5  117.39   14.80
   9  -6   5  112.29    8.00
   9   6  -5  128.39   16.80
   9  -6   5  106.39   16.70
  -9   6   5  106.69   10.30
   6   9   5  103.69   14.40
  -6  -9   5  103.29   13.10
  -6   9  -5  128.79   15.60
   7  -9   5   35.20   10.90
  -7  -9  -5   36.20    9.90
   9   7   5   39.60    5.20
  -7   9   5   48.90    5.00
  -7   9   5   42.10    4.90
   9   7   5   46.70   12.80
  -9  -7   5   49.60   11.10
  -9   7  -5   36.30   11.30
   9  -7  -5   49.99    7.20
   7   9  -5   60.89   13.00
  -7   9   5   34.20   10.60
  -9   7   5   42.40   11.00
   7   9   5   39.10   11.60
  -9   7   5   49.20    7.00
  -9  -7  -5   37.00   10.20
  -9  -7  -5   54.99    5.10
  -7   9  -5   46.50   11.90
  -7  -9   5   35.00   10.60
   7  -9  -5   37.80   12.10
  -8  -9  -5   16.30    9.00
  -9   8  -5    2.10   10.00
   9  -8  -5   21.60   11.90
  -9  -8   5   13.90    9.70
   8  -9   5   14.70   10.40
  -8   9   5   29.40   10.60
   8   9  -5   10.50   10.40
   9   8   5   13.30   11.30
   9  -8   5   15.80   11.20
  -9   8   5   25.40   10.70
   8  -9  -5   16.60   10.80
  -8  -9   5   13.80    8.80
  -8   9  -5   19.80   10.80
   8   9   5   20.70   11.70
  -9  -8  -5    6.40    9.20
   9   8  -5   14.90   10.90
  10   0  -5   61.19   11.90
  10   0   5   53.89   11.50
   0  10   5   61.39   11.50
   0  10   5   60.39    8.30
   0  10   5   48.20    7.20
  10   0   5   53.59   10.10
   0  10  -5   51.79    6.60
 -10   0  -5   58.39   10.60
   0 -10   5   69.99    7.10
  10   0  -5   63.99   11.30
   0  10   5   54.69    7.40
 -10   0   5   64.79   10.70
   0  10   5   57.99    8.60
   0  10  -5   66.29    7.10
   0  10  -5   48.50   10.50
  -1  10   5  199.58   13.70
   1  10  -5  190.38   13.70
 -10  -1   5  193.38   17.20
  -1  10   5  187.38   14.50
  10   1   5  198.38   17.90
  -1  10   5  185.98   13.70
  10   1   5  187.68   18.40
  10  -1  -5  195.28   17.00
   1  10  -5  206.78   17.80
  -1  10   5  208.38   18.40
 -10   1  -5  185.38   17.00
   1 -10   5  176.58   13.50
  10  -1  -5  177.28   18.90
  -1  10   5  202.28   14.70
  -1  10  -5  182.48    9.60
   1  10   5  196.28   11.20
 -10   1   5  201.08   17.10
  -1  10  -5  191.68   14.00
  -1 -10   5  189.28   12.40
  -1  10  -5  179.58    9.60
   1  10   5  225.58   18.60
  10  -1   5  193.78   19.40
  10   1  -5  208.68   18.80
 -10  -1  -5  208.58   17.90
  -1  10  -5  191.08   17.70
  10   1  -5  173.48   18.20
   1  10   5  186.48   15.40
   1  10   5  202.58   15.10
   1  10   5  203.28   11.60
  10   2   5   89.09   14.80
 -10   2  -5  117.39   14.20
   2 -10   5  108.49   11.50
  -2 -10  -5  112.29   13.50
  -2  10   5  102.59   11.70
  -2 -10  -5  106.69   11.00
   2  10  -5   97.39   10.70
  -2  10   5   90.39    9.50
 -10   2  -5   89.69   10.90
  10  -2  -5   86.79   11.50
  10  -2  -5   95.19   14.30
  -2  10   5  105.79   14.50
  -2  10   5   98.79    9.20
   2  10  -5  103.89   13.70
 -10  -2   5   90.49   12.30
  10   2   5  108.79   14.70
  10  -2   5  102.79   11.80
   2 -10  -5  107.39   11.70
  10   2  -5  100.89   14.50
  10  -2   5   98.19   15.70
 -10   2   5   93.39   12.70
  -2  10  -5  106.29   13.80
  10   2  -5  111.09   15.90
 -10  -2  -5   80.19   12.10
   2  10   5  106.99   12.10
  -2 -10   5  104.99    9.90
  -2  10  -5  116.99   12.30
 -10  -3   5   80.59   12.10
  -3 -10  -5   58.39   10.80
  10   3   5   66.99   11.20
  10   3   5   63.29   11.70
 -10   3  -5   71.59   11.60
 -10  -3   5   93.79   11.60
  10  -3  -5   77.39   14.30
   3  10  -5   65.19   10.10
  -3  10   5   68.19   12.40
   3 -10   5   76.29   10.60
  -3  10   5   86.39   11.30
  -3  10   5   78.59    8.00
  10  -3  -5   71.19   12.50
 -10   3  -5   77.59    9.60
 -10  -3  -5   73.19   11.60
   3 -10  -5   81.19   11.40
  10   3  -5   89.99   14.50
  -3 -10   5   62.09    8.40
   3  10   5   56.99   10.40
  -3 -10   5   59.79   10.60
  -3  10  -5   88.89   11.40
 -10   3   5   65.89   11.20
  10   3  -5   62.99   11.10
  10  -3   5   68.69    9.60
  10  -3   5   69.09   13.20
  -3  10  -5   76.89   12.30
 -10  -3  -5   74.69   10.10
  10  -4  -5   16.50    6.80
  10  -4  -5   10.40   10.10
  10   4   5   15.20    7.30
 -10  -4   5   22.40    6.70
   4  10  -5    7.30    7.10
  -4 -10  -5   14.00    7.60
 -10   4  -5   11.70    8.70
  -4  10   5   16.70    4.00
  -4  10   5   14.40    3.70
   4 -10   5    8.90    7.10
 -10   4  -5   12.80    5.30
  -4  10   5   13.20    8.70
 -10  -4   5   13.00    7.90
  10   4   5   18.70    9.90
 -10  -4  -5    8.40    5.80
   4 -10  -5   20.40    8.30
  10  -4   5   20.60    6.20
  10   4  -5   13.10    9.30
 -10  -4  -5   23.60    9.30
   4  10   5    6.30    7.90
  10  -4   5   11.00   10.20
  -4 -10   5   22.70    9.10
  10   4  -5   10.70    7.20
 -10   4   5   12.40    7.90
  -4  10  -5   14.30    8.80
  10  -5  -5  173.98   23.10
 -10   5  -5  164.28   18.30
  -5 -10  -5  198.78   18.80
  -5  10   5  165.68    9.90
 -10  -5   5  186.58   18.60
   5 -10   5  191.98   18.10
 -10   5  -5  197.08   13.70
 -10  -5   5  216.98   14.70
  10   5   5  184.38   19.90
  -5  10   5  188.18   10.20
   5  10  -5  192.18   18.40
  10  -5  -5  191.78   15.20
  10   5   5  192.88   16.00
  -5  10   5  185.88   19.40
 -10  -5  -5  220.28   14.70
  -5  10  -5  224.08   20.50
  10   5  -5  170.28   20.00
  10  -5   5  221.68   13.80
 -10  -5  -5  184.18   19.10
 -10   5   5  210.88   19.30
   5  10   5  207.68   19.50
   5 -10  -5  201.68   18.90
  10  -5   5  177.28   23.20
 -10   5   5  197.08   14.90
  -5 -10   5  179.18   18.20
 -10   6  -5   45.70   12.70
   6  10  -5   41.90   11.20
  10  -6  -5   44.00   13.20
  -6 -10  -5   37.70   10.90
 -10  -6   5   59.09    7.50
 -10  -6   5   63.29    7.20
  10  -6  -5   61.89    9.00
  10   6   5   54.29    8.50
  10   6   5   32.30   11.30
  -6  10   5   52.49   12.50
   6 -10   5   32.80   10.10
 -10  -6   5   54.99   11.80
 -10  -6  -5   42.00   11.20
   6 -10  -5   55.19   12.00
  10  -6   5   51.99    6.10
  -6 -10   5   44.30   17.90
  10   6  -5   57.19   13.60
 -10   6   5   45.00    7.50
  10  -6   5   36.60   12.70
  -6  10  -5   33.60   10.90
   6  10   5   49.30   12.20
 -10  -6  -5   50.79    7.10
 -10   6   5   58.59   18.90
 -11   0  -5   17.60    9.30
   0  11   5   15.10    6.00
   0  11  -5   10.30    4.00
 -11   0   5    7.70    8.20
  11   0  -5    5.00    9.00
   0  11   5   14.50    6.30
   0  11   5   18.80    6.80
   0  11   5   10.20    4.80
  11   0   5   20.60    9.60
   0  11  -5   12.10    4.30
   0 -11   5    6.30    4.00
  11   0  -5   10.90    8.60
   0  11   5    7.50    9.10
  11   0   5    2.50    9.10
   0  11  -5    4.00    8.90
  -1  11   5    3.60    4.30
  11  -1  -5    7.20    8.30
  -1  11   5    0.10    5.00
  -1  11   5    9.70    9.00
 -11  -1   5   -5.80    7.10
  -1  11   5    0.70    5.10
   1 -11   5    1.00    5.10
  -1  11   5   -5.50    5.10
  11   1   5    4.10    8.80
 -11   1  -5    7.40    8.50
   1  11  -5    4.80    7.80
  11   1   5    0.80    8.00
   1  11  -5    5.50    5.30
  11  -1  -5    6.90    9.70
  -1  11  -5    0.20    4.60
   1  11   5   -0.80    4.90
   1  11   5    2.30    2.50
  11   1  -5    2.40    8.30
   1  11   5    5.90    9.30
 -11   1   5    3.00    7.90
  11  -1   5   -3.10    9.30
  -1 -11   5    4.30    4.00
   1  11   5    2.00    2.40
  11  -1   5   -0.70    7.20
 -11  -1  -5   -1.90    7.40
   1  11   5    4.40    6.30
  11   1  -5    5.80    8.80
  -1  11  -5    3.40    8.50
   2  11  -5   32.10   10.60
  -2  11   5   56.49    9.70
  -2  11   5   55.09    9.40
  11   2   5   44.50   11.30
 -11   2  -5   32.50   10.30
  11  -2  -5   50.79   10.60
   2 -11   5   47.60    8.60
  -2  11   5   49.50    6.50
 -11  -2   5   49.60   11.20
  -2  11   5   51.99   12.40
  11   2   5   32.90   10.50
   2  11  -5   49.99    8.80
  -2  11   5   50.99    7.10
  11  -2  -5   47.50   12.90
  11  -2   5   32.60    9.10
 -11  -2  -5   50.89   11.30
  -2 -11   5   55.19   10.80
  -2  11  -5   51.29    8.70
  11   2  -5   54.99   13.10
  11   2  -5   51.89   11.60
  -2  11  -5   38.60   10.70
   2  11   5   38.40    9.10
  11  -2   5   45.00   12.40
   2  11   5   55.99   12.10
 -11   2   5   43.30   10.10
   3  11  -5   57.49   11.40
  -3 -11  -5   41.60   10.40
  11   3   5   54.29   11.10
  11  -3  -5   82.99   22.70
  11  -3  -5   59.69   10.40
   3  11  -5   54.29   11.80
   3 -11   5   58.29    9.70
  -3  11   5   45.00    7.00
 -11   3  -5   46.00   11.20
 -11  -3   5   38.90   10.20
  -3  11   5   54.09    6.30
  11   3   5   50.89   12.50
 -11   3   5   46.90   11.00
 -11  -3  -5   51.59   11.80
   3  11   5   62.59   11.10
  11   3  -5   45.40   10.70
  -3  11  -5   62.79   14.10
  11  -4  -5   23.60    8.00
  -4 -11  -5   23.60    9.90
  11   4   5   39.80   12.60
  11   4   5   40.90    9.80
  -4  11   5   49.20   12.40
  11  -4  -5   35.80   12.90
 -11  -4   5   33.20   10.60
   4  11  -5   37.20    9.40
 -11   4  -5   39.60    7.50
   4 -11   5   40.20    9.50
 -11   4  -5   29.20   10.60
  -4  11   5   35.50    3.70
  11  -4   5   29.10   12.90
   4 -11  -5   23.00    9.00
  -4 -11   5   31.60    9.60
   4  11   5   36.10    9.80
  11  -4   5   41.60    8.20
  11   4  -5   43.20   12.70
  -4  11  -5   41.40   12.60
 -11  -4  -5   25.70   10.30
 -11   4   5   31.00   16.30
  11   4  -5   40.30   10.20
  11   5   5  384.26   28.80
  11  -5  -5  334.87   21.80
 -11   5  -5  381.56   27.20
  -5  11   5  353.06   27.30
 -11  -5   5  346.57   25.60
   5 -11   5  305.67   24.00
  11   5   5  293.77   22.10
  11  -5  -5  305.87   28.60
   5  11  -5  319.47   24.60
  -5 -11  -5  313.57   24.80
   5  11   5  337.37   26.00
  -5  11  -5  386.16   27.70
   5 -11  -5  342.97   25.30
  -5 -11   5  301.17   25.00
  11  -5   5  357.26   20.20
 -11   5   5  298.57   25.30
  11  -5   5  355.76   29.20
 -11  -5  -5  348.87   26.10
  11   5  -5  372.86   29.00
  12   0   5   21.50   11.80
 -12   0  -5    9.60    9.70
   0  12   5   15.70   10.70
  12   0   5   16.80    9.70
   0  12   5   26.20    7.40
   0  12  -5   31.30   10.80
   0  12  -5   23.50    4.50
 -12   0   5   15.30    9.60
   0  12   5   26.10    5.10
  12   0  -5   30.10   11.50
  12  -1  -5   43.90   11.20
   1 -12   5   55.99    7.40
 -12  -1   5   46.00   11.40
  12   1   5   57.69   12.80
   1  12  -5   49.00    7.70
 -12   1  -5   40.40   11.20
  12  -1  -5   44.20   13.60
   1  12  -5   42.80   11.80
  -1  12   5   58.49    8.30
  -1  12   5   48.00   12.10
  -1  12   5   49.99    7.90
   1  12   5   31.70   12.00
  -1  12  -5   46.40   11.80
   1  12   5   57.09   10.10
 -12  -1  -5   41.40   11.40
 -12   1   5   52.69   11.60
  12   1  -5   63.59   13.60
  12   1  -5   62.49   13.60
  12  -1   5   33.20   12.60
  12  -1   5   64.29   11.80
  12   2   5   41.20   11.30
  12   2   5   27.10   12.20
  -2  12   5   40.00    8.60
   2  12  -5   35.10   11.70
   2  12  -5   39.70    8.30
 -12  -2   5   39.20   11.00
   2 -12   5   37.50    8.00
  -2  12   5   31.50   11.60
  12  -2  -5   40.90   12.70
  12  -2  -5   31.90   10.30
  -2  12   5   42.70    6.30
 -12   2  -5   37.20   11.60
  12   2  -5   39.30   10.70
 -12  -2  -5   26.60   10.50
  12  -2   5   38.40    9.80
 -12   2   5   50.39   11.60
   2  12   5   25.30    8.60
  12   2  -5   40.20   12.30
   2  12   5   41.10   13.10
  -2  12  -5   42.50   12.20
  12  -2   5   22.70   11.90
   0   0  -6    0.00    1.30
   0   0   6    1.70    1.60
   0   0  -6    0.70    0.50
   0   0   6    0.90    1.30
   0   0  -6   -0.30    1.30
   0   0   6    0.80    0.60
   0  -1  -6  225.48   10.90
   0  -1   6  201.68    9.60
  -1   0  -6  215.48   11.00
   1   0  -6  211.08   10.80
   0   1  -6  207.48    9.60
   0   1   6  198.78   10.60
   1   0  -6  206.98   10.80
   0   1  -6  190.18   10.60
  -1   0   6  203.48   10.90
   1   0   6  207.08   10.90
   1   0   6  204.78   10.00
   0  -1   6  196.28   10.70
   0   1  -6  205.18   10.40
  -1   0   6  212.98   10.80
  -1   0   6  202.78    9.10
   1   0   6  201.88   10.50
   1   0   6  215.58   10.50
   0  -1  -6  212.58    9.70
  -1   0  -6  201.28    9.90
   1   0  -6  205.28    9.10
   0   1   6  208.78    9.70
   0   1   6  210.78   10.90
   0  -1   6  211.28   10.40
   0  -1  -6  208.08   10.70
  -1  -1  -6 2246.38  105.99
   1   1   6 2335.37  106.59
   1  -1   6 2340.67  107.79
   1  -1  -6 2314.67  111.49
   1   1  -6 2257.47  102.89
  -1   1   6 2266.37  104.09
  -1   1   6 2459.65  104.59
  -1   1  -6 2222.68  106.39
   1  -1   6 2240.08  106.59
  -1   1   6 2340.77  111.99
  -1   1  -6 2317.17  107.79
   1   1   6 2460.65  112.49
  -1  -1   6 2201.88  102.89
  -1  -1   6 2465.85  112.39
   1   1  -6 2375.96  111.99
  -2   0  -6 1616.14   79.19
  -2   0  -6 1632.04   81.59
   0   2   6 1616.34   82.39
   2   0   6 1638.84   81.49
   0   2  -6 1564.24   78.39
   0   2  -6 1661.63   76.99
   2   0  -6 1647.14   74.89
   0   2  -6 1543.95   76.89
   2   0  -6 1555.54   83.49
  -2   0   6 1625.74   84.29
   0   2   6 1699.03   83.39
  -2   0   6 1530.85   74.89
   0   2   6 1654.43   77.39
   2   0   6 1621.54   79.89
   0  -2   6 1603.14   78.49
   0  -2  -6 1595.84   76.99
  -2  -1   6 2083.49  102.79
  -1  -2  -6 2081.99   95.99
  -1   2   6 1995.40   99.59
   2  -1  -6 1878.31   99.89
  -1  -2  -6 2152.58  102.09
  -1   2   6 1994.40   95.29
  -1   2   6 1996.70   94.99
  -2   1  -6 2042.40   96.49
   2   1   6 2233.98   98.09
   1  -2   6 1964.90   95.89
  -2  -1   6 2005.70   92.69
   1   2  -6 2008.00   99.49
   2   1   6 2093.79  101.89
  -2   1  -6 1958.30   96.89
   1   2  -6 2069.29   93.69
   1  -2   6 2106.79   93.69
   2  -1  -6 1993.30   93.49
   2  -1   6 2034.00   97.49
   1   2   6 2122.59  102.29
   2  -1   6 1839.32   95.29
   2   1  -6 2054.29  102.49
  -2   1   6 1928.51   93.49
  -1   2  -6 1943.51   93.19
  -2  -1  -6 1935.61   96.29
  -1  -2   6 1897.21   98.39
  -2   1   6 2104.19  101.99
  -2  -1  -6 1944.01  100.69
   1  -2  -6 1973.40   99.09
  -1  -2   6 1920.61   93.59
   1   2   6 2008.60   95.99
   2   1  -6 2023.10   92.59
  -1   2  -6 2140.19   96.99
   2  -2   6  694.03   33.00
  -2   2  -6  758.72   34.30
  -2   2   6  693.73   32.60
   2   2   6  689.13   33.00
   2   2   6  719.53   33.70
  -2   2   6  692.13   33.10
   2  -2  -6  737.83   32.70
  -2  -2   6  717.83   32.40
  -2   2  -6  731.03   33.20
  -2  -2   6  747.03   32.80
   2   2   6  738.03   33.10
   2   2  -6  746.33   32.40
  -2  -2  -6  733.13   33.00
   2  -2   6  737.83   32.00
   2   2  -6  673.63   33.40
  -2  -2  -6  715.73   32.90
   2  -2   6  701.93   34.00
   2  -2  -6  722.13   34.20
  -2  -2   6  740.03   33.50
  -2  -2  -6  728.43   33.60
  -2  -2   6  717.43   32.80
  -2   2   6  732.23   34.20
   2  -2   6  718.43   32.00
   0   3   6  488.85   24.00
   3   0   6  523.85   24.00
   3   0   6  495.55   24.80
   0   3  -6  533.55   23.70
  -3   0  -6  492.85   23.90
  -3   0   6  508.55   24.40
  -3   0  -6  528.75   24.00
  -3   0   6  493.35   23.20
   0  -3   6  483.65   22.90
  -3   0   6  543.15   24.70
   3   0  -6  470.75   24.20
  -3   0  -6  532.65   24.90
   0   3   6  497.95   24.00
   0  -3  -6  503.15   23.60
   0   3  -6  519.75   23.60
   0  -3   6  480.25   23.60
   0   3   6  504.75   24.00
   0   3  -6  489.65   23.00
   0   3   6  490.35   23.60
   3   0   6  501.75   24.10
   0   3   6  516.75   24.00
   0   3  -6  491.45   23.70
   3   0  -6  469.25   24.60
   3   0  -6  487.45   23.10
  -1   3   6  474.95   21.70
  -3  -1   6  465.35   22.30
  -1   3   6  462.85   21.60
   1   3  -6  452.35   21.50
   1   3  -6  445.36   21.00
   3   1   6  479.05   21.90
   3  -1  -6  446.76   21.00
   3  -1  -6  441.76   21.90
  -1  -3  -6  476.75   21.30
  -3   1  -6  469.95   22.90
   3   1   6  468.95   22.40
  -1  -3  -6  479.45   21.60
  -1   3   6  457.15   22.30
   1  -3   6  449.36   22.10
   3   1   6  464.95   22.20
   3  -1  -6  466.45   22.90
   1   3  -6  479.55   21.30
   1  -3   6  449.36   20.20
  -3  -1   6  477.45   21.10
  -1  -3  -6  475.45   22.10
  -3   1  -6  461.15   21.20
   1  -3   6  450.05   21.50
  -3  -1   6  467.45   22.00
  -1   3   6  480.65   21.60
  -3   1  -6  448.16   21.80
  -3  -1  -6  427.16   22.00
   1  -3  -6  428.26   21.40
   1   3   6  418.46   21.30
  -3   1   6  460.75   22.70
  -1   3  -6  451.65   22.20
   3   1  -6  455.05   20.90
   3  -1   6  426.26   21.70
  -1   3  -6  450.35   21.60
  -1  -3   6  414.46   21.10
   1  -3  -6  410.46   22.00
   3  -1   6  440.66   22.80
   1   3   6  415.76   21.90
   3   1  -6  396.36   22.00
  -3  -1  -6  416.06   21.90
  -3   1   6  427.06   21.10
  -1   3  -6  416.76   20.10
  -3   1   6  426.76   21.90
   3  -1   6  469.15   21.30
   3   1  -6  450.85   22.10
  -1  -3   6  427.76   20.90
  -1  -3   6  426.36   21.20
  -3  -1  -6  455.45   21.70
   1   3   6  435.26   21.30
  -3   2  -6  573.14   28.80
   2   3  -6  617.34   28.20
   2   3  -6  583.14   29.00
  -2   3   6  612.24   29.80
   3   2   6  612.64   28.80
  -2  -3  -6  595.14   31.30
   2  -3   6  602.44   26.80
   3  -2  -6  578.54   28.20
   3   2   6  592.24   29.40
   2  -3   6  595.04   26.80
  -3   2  -6  551.54   31.20
   3  -2  -6  585.54   28.70
  -3  -2   6  610.24   28.50
  -2  -3  -6  595.04   28.00
  -3  -2   6  595.44   28.40
   3  -2  -6  583.14   30.10
  -2   3   6  580.84   28.50
   2  -3   6  553.64   28.50
  -3   2  -6  563.74   27.60
  -2  -3  -6  559.04   28.50
   3   2   6  547.85   28.70
  -3  -2   6  573.34   28.10
  -2   3   6  558.24   28.40
   2  -3   6  595.54   29.60
  -2  -3   6  633.74   28.40
  -3  -2  -6  626.24   30.80
   3  -2   6  622.24   29.00
  -3  -2  -6  624.04   28.80
  -2   3  -6  676.43   30.10
  -2  -3   6  617.64   28.80
   2  -3  -6  632.74   28.60
   2  -3  -6  662.13   30.00
  -3   2   6  626.44   28.50
   3   2  -6  668.73   29.80
   3   2  -6  645.34   28.20
   2   3   6  626.54   28.30
   2   3   6  640.94   29.60
  -3   2   6  628.34   28.90
   2   3   6  620.94   28.70
   3  -2   6  670.03   27.80
  -3  -2  -6  636.44   28.70
  -2  -3   6  651.43   27.90
  -2   3  -6  682.13   29.20
  -3   2   6  645.14   31.80
  -3  -3  -6   70.59    5.60
  -3   3   6   76.39    6.30
  -3   3   6   75.39    7.40
  -3   3  -6   76.39    7.70
   3  -3  -6   72.99    6.10
   3  -3  -6   88.79   10.20
  -3  -3  -6   71.99    7.00
   3  -3   6   75.09    4.30
   3   3  -6   82.29    6.00
  -3  -3   6   66.79    5.90
   3   3   6   69.89    5.90
  -3  -3   6   73.29    5.40
   3  -3   6   72.49    6.60
   3   3   6   74.29    6.50
  -3  -3   6   72.09    5.40
   3   3   6   70.89    7.20
  -3  -3   6   72.09    6.70
   3  -3   6   74.79    4.40
  -3   3  -6   73.39    7.60
   3   3  -6   58.29    6.60
  -3   3   6   74.99    6.20
   3  -3  -6   73.29    6.10
   0   4  -6  603.74   27.40
   0   4   6  571.34   27.30
   4   0   6  571.44   27.50
   4   0  -6  555.44   27.90
   4   0   6  574.24   27.80
   4   0  -6  586.04   26.80
   4   0  -6  588.04   28.70
   0   4  -6  554.44   26.20
  -4   0   6  585.64   27.10
   0  -4  -6  568.84   27.30
   0  -4   6  550.34   26.00
   0   4  -6  573.94   26.90
  -4   0   6  559.54   27.90
  -4   0  -6  595.84   28.70
   0   4   6  567.04   27.30
   0  -4   6  556.84   26.90
   0   4   6  586.94   27.40
  -4   0  -6  565.74   27.40
   0   4   6  557.04   27.30
   4   0   6  545.65   28.40
  -4   0  -6  557.14   27.60
   0   4  -6  590.04   27.30
  -1   4   6  585.74   28.20
   1   4  -6  635.04   28.30
  -1  -4  -6  595.24   28.30
   4   1   6  563.94   29.00
  -1   4   6  587.44   28.50
  -4  -1   6  615.14   28.80
  -4   1  -6  590.54   28.00
   1  -4   6  580.74   26.30
  -4  -1   6  578.24   27.90
   1   4  -6  575.34   27.20
   1  -4   6  575.94   28.40
   1   4  -6  576.64   27.90
  -1   4   6  588.94   28.90
  -1   4   6  583.04   28.10
   4   1   6  602.54   28.80
   4  -1  -6  571.64   27.80
  -4   1  -6  588.64   29.70
   4  -1  -6  562.84   28.60
  -4   1  -6  565.24   28.80
   4  -1  -6  618.44   31.70
  -4  -1   6  614.14   29.20
   4   1   6  616.94   29.00
   4  -1   6  629.74   29.00
   4   1  -6  600.94   27.90
  -4  -1  -6  605.34   28.90
  -1  -4   6  587.84   27.30
   1  -4  -6  602.34   28.80
   1   4   6  602.54   28.40
  -4  -1  -6  595.94   29.80
  -1   4  -6  575.84   26.30
  -1  -4   6  565.24   27.50
   4  -1   6  612.64   28.10
   1   4   6  601.14   28.80
  -4  -1  -6  628.04   29.10
  -4   1   6  597.34   28.10
  -1   4  -6  608.34   28.90
   1   4   6  591.74   27.70
  -1   4  -6  597.34   28.50
  -1  -4   6  588.54   28.20
  -4   1   6  623.04   30.40
  -4   1   6  625.64   29.70
   1   4   6  568.64   27.80
   4   1  -6  592.44   29.10
   4   1  -6  549.54   30.00
  -1   4  -6  612.94   28.80
  -2  -4  -6   18.90    2.90
  -2  -4  -6   14.80    3.50
  -2  -4  -6   22.00    4.20
  -4   2  -6   10.40    3.60
   4  -2  -6   18.40    4.90
   4  -2  -6   10.10    3.30
  -2   4   6   17.20    3.90
  -4   2  -6   16.80    2.90
  -2   4   6   15.30    3.50
  -4  -2   6   17.20    3.40
  -4  -2   6   19.30    3.40
   2   4  -6   16.30    3.60
   2  -4   6   18.40    3.70
   4   2   6    9.00    3.50
   4   2   6   18.90    4.20
  -4   2  -6   14.20    4.50
  -4  -2   6   12.60    3.60
   2   4  -6   15.90    2.50
   2  -4   6   18.20    4.30
  -2   4   6   20.50    3.60
   4   2   6   16.30    3.70
   4  -2  -6   18.80    3.40
  -2   4   6   20.00    4.50
  -2  -4   6   16.50    2.50
  -4  -2  -6   10.30    3.40
   2   4   6   11.30    3.90
   2   4   6   12.80    2.70
  -2   4  -6   16.00    4.40
  -4  -2  -6   10.40    3.40
   2  -4  -6   15.10    4.30
  -4   2   6   11.80    3.90
   4  -2   6    8.70    3.80
   4  -2   6   11.90    3.60
   2  -4  -6   17.50    3.40
  -4  -2  -6    8.30    3.10
  -2   4  -6    8.50    3.90
   4  -2   6   10.90    2.70
   4   2  -6   12.90    3.50
  -2  -4   6   11.50    3.20
   4   2  -6   11.70    3.00
  -4   2   6    9.30    3.10
  -2  -4   6   12.50    3.20
  -4   2   6   17.70    3.90
   2   4   6   14.30    3.80
   4   2  -6   18.00    4.60
  -3  -4  -6  197.98   12.00
  -4  -3   6  196.78   10.90
  -3   4   6  188.08   11.20
   4  -3  -6  185.98   13.50
   3  -4   6  178.68   11.80
  -3  -4  -6  190.38   12.50
  -4   3  -6  186.58   12.20
  -4  -3   6  186.58   11.40
  -3   4   6  184.88   11.90
  -3   4   6  188.88   13.00
   4  -3  -6  197.98   11.60
  -4  -3   6  178.18   12.10
  -4   3  -6  188.48    9.90
   4   3   6  202.48   12.20
   4   3   6  180.68   11.30
   3   4  -6  180.68   11.30
   4  -3  -6  187.58   11.40
  -3  -4  -6  197.58   10.40
  -4  -3   6  205.68   11.00
   3  -4   6  188.88   12.90
   3   4  -6  203.98   12.60
   4   3   6  177.58   12.60
  -4   3  -6  210.98   13.80
   4  -3   6  171.08   13.00
   4   3  -6  185.28   12.70
   3  -4  -6  191.18   11.10
   4  -3   6  179.58   12.00
  -3  -4   6  204.68   10.10
   3   4   6  179.18   10.60
   3  -4  -6  206.18   13.50
  -3  -4   6  185.28   11.80
  -4  -3  -6  176.28   12.40
   4  -3   6  195.68    9.90
  -4   3   6  200.38   13.10
   3   4   6  197.78   12.80
  -4   3   6  197.08   11.70
  -3   4  -6  197.48   13.20
  -4   3   6  196.18   13.40
   3  -4  -6  182.88   11.50
   3   4   6  197.58   12.00
  -4  -3  -6  190.68   12.00
  -3  -4   6  198.48   10.00
   4   3  -6  192.28   11.40
  -3   4  -6  206.78   12.50
  -4  -3  -6  183.58   11.00
  -4   4  -6 2065.39   90.79
  -4  -4  -6 1991.90   87.09
  -4  -4   6 2066.09   86.79
  -4  -4   6 2065.29   86.89
  -4   4   6 1905.41   87.89
   4  -4   6 1959.40   85.39
   4  -4   6 2070.39   85.49
  -4  -4   6 1959.90   88.29
   4   4   6 1950.40   87.49
   4  -4   6 1951.10   88.89
  -4  -4  -6 1891.91   88.59
   4   4  -6 1948.71   89.49
  -4  -4   6 1918.31   88.89
   4   4   6 1948.31   88.79
   4  -4  -6 1954.80   90.39
   4  -4   6 1929.51   90.09
   4  -4  -6 2041.10   88.59
  -4   4   6 2029.70   90.49
   4   4   6 1917.71   89.69
  -4   4  -6 1989.60   89.19
   4   4  -6 2022.60   88.19
  -4  -4  -6 1970.90   89.49
  -5   0   6  121.49    9.60
   0   5   6   99.59    7.80
   0   5  -6  108.09    8.50
   5   0  -6  109.19    9.10
   5   0  -6   96.29    9.40
   5   0  -6  103.39    7.80
   5   0   6   97.89    9.40
   0   5   6  109.09    8.40
  -5   0  -6   93.89    8.50
   0   5  -6   98.09    6.70
   0  -5   6  109.79    7.50
   0   5   6   90.89    7.70
   0   5  -6  105.99    8.20
   0  -5  -6  100.59    8.30
   0   5   6  110.99    8.60
   0  -5   6  108.19    6.50
   5   0   6  113.99    9.00
   0   5  -6   97.29    7.40
  -5   0   6  102.19    8.80
  -5   0  -6  109.09    8.40
  -5   0   6  102.19    8.20
  -5   0  -6  102.69    9.30
   5  -1  -6  203.68   13.10
   5  -1  -6  206.88   12.20
  -1   5   6  218.88   13.20
   1  -5   6  216.58   12.60
  -1   5   6  222.48   12.50
   1   5  -6  195.68   11.90
  -1   5   6  216.98   13.00
   1   5  -6  236.28   12.90
  -5  -1   6  246.38   13.60
   5   1   6  230.38   13.50
   5  -1  -6  182.28   13.90
   1  -5   6  220.58   10.10
  -1  -5  -6  224.68   12.80
  -1  -5  -6  211.58   12.80
   5   1   6  202.98   13.70
   5   1   6  221.48   13.50
  -1   5   6  228.78   13.30
  -5  -1   6  217.88   12.60
  -5  -1   6  208.18   13.30
  -1   5   6  212.98   12.30
   1   5  -6  208.38   11.10
  -5   1  -6  216.88   12.50
  -5   1  -6  202.28   13.20
  -5   1  -6  232.28   14.50
   5   1  -6  200.18   13.60
  -5  -1  -6  207.58   13.10
  -5   1   6  216.88   14.00
  -1   5  -6  197.18   12.80
  -5   1   6  201.18   12.90
  -1  -5   6  199.58   12.60
  -5   1   6  208.88   14.00
   1   5   6  199.68   11.60
   1  -5  -6  188.08   12.60
  -1   5  -6  212.88   12.90
   1   5   6  209.48   12.80
   1   5   6  214.08   11.90
  -5  -1  -6  195.58   13.00
   5  -1   6  212.48   14.40
  -1  -5   6  201.58   11.60
  -1   5  -6  197.18   12.60
   5   1  -6  189.68   13.40
  -1   5  -6  195.38   10.10
  -1  -5   6  213.38   11.10
   1   5   6  207.68   13.10
   5  -1   6  196.68   13.00
   5   1  -6  216.08   12.40
  -5  -1  -6  205.08   13.30
   5  -1   6  208.98   12.40
  -5   2  -6  713.63   34.30
   5  -2  -6  735.83   37.30
  -2   5   6  751.02   35.70
   5  -2  -6  702.03   34.80
  -5  -2   6  775.32   35.60
  -2   5   6  726.53   35.60
  -5  -2   6  754.32   35.00
   5   2   6  775.72   36.50
  -2   5   6  766.82   36.40
  -2  -5  -6  739.63   35.40
  -2   5   6  727.53   34.50
  -5  -2   6  730.73   36.10
  -5   2  -6  816.42   37.70
   2  -5   6  691.93   35.20
  -2  -5  -6  742.03   35.60
   5   2   6  708.93   35.60
   5   2   6  753.92   35.80
   2   5  -6  723.23   35.10
   2   5  -6  763.12   35.10
   5  -2  -6  735.63   35.30
  -2   5   6  718.73   34.50
   2   5  -6  680.03   32.90
  -5   2  -6  706.43   35.80
  -2  -5   6  733.03   33.00
   2   5   6  713.13   33.70
  -5   2   6  742.33   35.20
   5   2  -6  772.42   34.90
  -5   2   6  753.32   35.50
   2   5   6  743.03   36.00
   5  -2   6  779.62   34.40
  -5  -2  -6  735.33   35.40
   5   2  -6  751.72   35.70
  -5  -2  -6  722.73   35.60
  -5   2   6  783.92   37.20
  -5  -2  -6  699.13   35.90
   5  -2   6  737.03   35.90
  -2  -5   6  758.12   34.80
  -2  -5   6  708.43   35.10
   2   5   6  704.33   33.80
   5   2  -6  742.13   36.50
   5  -2   6  710.83   37.00
  -2   5  -6  755.42   35.80
  -2   5  -6  749.53   36.10
   2  -5  -6  716.23   36.00
   2   5   6  750.02   35.50
  -5   3  -6  491.35   25.10
  -3  -5  -6  457.65   20.40
   5   3   6  428.36   22.30
  -5   3  -6  442.26   23.20
   5  -3  -6  432.56   22.30
   3   5  -6  465.05   22.40
   5   3   6  441.56   23.80
   3  -5   6  419.56   22.60
  -3  -5  -6  420.56   22.90
  -5  -3   6  443.26   23.30
  -3  -5  -6  418.76   22.40
  -5   3  -6  445.16   20.80
  -3   5   6  455.05   23.00
   3  -5   6  419.66   23.30
  -3   5   6  454.05   23.00
  -5  -3   6  447.86   21.70
  -3   5   6  441.96   23.90
   5  -3  -6  408.16   23.40
   5  -3  -6  444.06   24.80
  -5  -3   6  435.46   22.30
   5   3   6  444.96   22.90
  -3   5   6  455.35   21.60
   3   5  -6  426.06   22.90
   5   3  -6  427.66   21.90
   5   3  -6  428.16   23.70
  -3  -5   6  419.36   19.50
  -3  -5   6  437.86   19.60
  -3   5  -6  414.16   23.10
   3   5   6  431.46   22.70
   3  -5  -6  421.76   21.20
  -5  -3  -6  430.96   23.30
   3  -5  -6  399.26   23.60
  -5   3   6  453.05   24.40
  -3  -5   6  394.76   22.00
  -5  -3  -6  412.46   22.70
   3   5   6  426.66   23.40
  -5  -3  -6  424.16   21.70
   5   3  -6  393.56   21.80
  -3  -5   6  395.46   22.00
  -5   3   6  416.76   22.30
  -3   5  -6  424.06   23.70
   3   5   6  400.56   20.40
   5  -3   6  411.36   20.50
   5  -3   6  409.86   24.10
  -5   3   6  413.16   22.00
   5  -3   6  404.76   22.80
   5   4   6 1306.57   62.09
  -4  -5  -6 1396.56   60.89
  -4   5   6 1318.07   62.09
  -4  -5  -6 1359.56   63.49
   4   5  -6 1365.56   64.09
  -4   5   6 1420.36   63.89
   4  -5   6 1304.67   63.49
   4   5  -6 1438.46   62.99
   4  -5   6 1320.27   64.59
  -5   4  -6 1420.96   65.69
   5  -4  -6 1379.76   65.59
   5   4   6 1387.66   63.69
   5  -4  -6 1346.37   62.99
  -5   4  -6 1350.26   60.49
   5   4   6 1342.77   64.49
   5  -4  -6 1480.45   65.79
  -5   4  -6 1381.56   63.99
  -4   5   6 1428.56   65.29
  -5  -4   6 1298.07   62.79
  -4  -5  -6 1359.56   64.09
  -5  -4   6 1427.86   61.59
  -5  -4   6 1305.17   63.69
  -5  -4   6 1478.65   61.69
  -4  -5   6 1290.57   62.89
  -5  -4  -6 1398.36   64.39
   5  -4   6 1247.18   64.79
   4  -5  -6 1389.86   63.19
  -5   4   6 1369.76   63.49
   5   4  -6 1448.36   62.99
  -4  -5   6 1360.96   63.39
   4   5   6 1410.46   63.69
  -4  -5   6 1413.66   60.19
  -5   4   6 1306.77   62.39
   5  -4   6 1363.66   63.89
  -5  -4  -6 1373.06   61.79
   4  -5  -6 1416.46   65.29
  -4  -5   6 1399.26   60.19
   4   5   6 1376.56   61.29
  -4   5  -6 1430.76   65.39
  -5   4   6 1342.77   65.09
   4  -5  -6 1412.86   61.99
  -4   5  -6 1451.05   64.29
  -5  -4  -6 1346.47   63.49
   4   5   6 1378.96   64.49
   5  -4   6 1325.47   60.29
   5   4  -6 1444.86   64.89
  -5  -5   6 2256.97  110.49
  -5   5  -6 2600.34  111.69
  -5  -5   6 2332.57  109.99
  -5  -5   6 2592.04  107.49
  -5   5   6 2357.16  109.09
  -5   5   6 2494.65  110.99
   5   5   6 2680.63  112.39
   5  -5   6 2397.76  111.09
  -5  -5  -6 2511.55  107.99
   5  -5   6 2285.57  112.09
   5   5  -6 2609.14  110.39
  -5   5   6 2631.84  115.89
  -5  -5  -6 2384.26  110.59
   5  -5  -6 2401.66  110.29
   5  -5  -6 2439.06  112.79
   5  -5  -6 2522.55  109.29
   5   5   6 2295.17  108.29
   5   5   6 2452.55  110.79
  -5  -5   6 2607.14  107.49
   5   5  -6 2499.45  111.89
  -5  -5  -6 2411.86  111.59
  -5   5  -6 2570.84  113.19
   6   0  -6  434.66   24.90
  -6   0   6  498.45   25.00
   0   6   6  454.25   23.30
   0   6  -6  435.86   23.70
   6   0   6  488.55   24.10
   6   0  -6  442.06   24.30
  -6   0  -6  468.25   25.00
   0   6  -6  472.85   23.70
  -6   0   6  446.26   23.50
   0  -6   6  454.45   21.30
   0   6  -6  463.25   22.40
   6   0  -6  438.56   23.00
   0   6   6  426.06   22.70
   0  -6  -6  442.26   23.60
  -6   0  -6  404.26   23.30
  -6   0   6  432.16   24.00
   0  -6   6  437.76   22.10
   6   0   6  463.15   24.20
   0   6   6  462.85   23.00
   0   6   6  441.36   23.10
   0   6   6  456.85   23.90
   0   6  -6  430.96   21.60
  -6   0  -6  447.56   24.10
   6   0   6  443.56   25.00
   6  -1  -6  262.77   18.50
   1  -6   6  274.37   16.00
  -1   6   6  300.77   17.30
  -1  -6  -6  281.87   16.40
  -1   6   6  268.77   15.90
   6   1   6  269.07   17.70
  -1   6   6  294.47   16.30
   1   6  -6  304.57   16.90
  -6  -1   6  277.87   17.40
  -6  -1   6  282.87   17.20
   6  -1  -6  283.77   17.20
   1   6  -6  279.87   15.70
   6   1   6  304.77   17.80
  -6  -1   6  281.47   16.70
  -1   6   6  295.67   17.00
   6   1   6  277.87   17.30
  -6   1  -6  298.27   18.70
  -1   6   6  300.47   17.60
   1   6  -6  270.67   14.60
   1  -6   6  283.37   13.60
   6  -1  -6  289.37   16.40
  -6   1  -6  278.17   16.40
  -6   1  -6  295.87   17.60
  -1  -6  -6  288.77   17.00
  -6   1   6  289.87   17.20
   6   1  -6  303.67   18.20
   1   6   6  297.67   17.20
   6  -1   6  299.07   16.70
   6  -1   6  279.17   18.50
  -1   6  -6  270.17   13.70
   6   1  -6  297.57   18.10
  -6  -1  -6  282.87   17.20
  -1  -6   6  292.47   15.40
   1   6   6  320.37   17.40
  -1  -6   6  300.27   14.60
  -6   1   6  322.87   18.60
  -6  -1  -6  293.27   17.40
  -6  -1  -6  316.37   17.90
  -1   6  -6  296.77   17.30
   1  -6  -6  312.47   17.00
  -1   6  -6  303.77   17.20
  -6   1   6  299.37   17.00
   6   1  -6  305.27   16.60
   1   6   6  289.47   15.60
   6  -1   6  293.67   17.50
   1   6   6  282.17   15.30
  -6   2  -6  406.16   22.60
  -6   2  -6  467.25   24.70
  -6   2  -6  385.86   20.80
   2   6  -6  432.26   21.90
   2   6  -6  405.06   21.50
  -6  -2   6  402.86   22.70
   6   2   6  428.56   22.60
  -6  -2   6  461.45   22.30
  -2   6   6  398.46   20.90
  -2   6   6  416.16   22.40
  -2  -6  -6  403.36   21.90
   6  -2  -6  393.66   21.40
  -2   6   6  422.76   22.60
  -2   6   6  427.76   22.80
  -2   6   6  407.96   20.80
   6   2   6  398.86   22.90
   6   2   6  398.66   22.40
  -6  -2   6  420.76   21.90
   6  -2  -6  414.66   22.10
   6  -2  -6  378.46   23.90
  -2  -6  -6  398.86   21.90
   2  -6   6  404.06   22.00
   2   6  -6  380.76   18.60
  -2  -6   6  386.16   20.80
   2   6   6  375.46   19.50
   6  -2   6  407.76   20.90
   6   2  -6  399.66   22.40
  -2  -6   6  405.36   18.50
  -2   6  -6  418.16   22.60
   2  -6  -6  404.76   22.40
   2   6   6  410.16   22.50
   2   6   6  393.86   19.80
   6  -2   6  378.56   23.60
  -2  -6   6  375.16   21.70
  -6  -2  -6  438.86   22.80
   6  -2   6  389.56   22.40
   6   2  -6  410.16   21.50
  -6   2   6  395.96   21.90
  -6  -2  -6  387.16   21.80
  -6   2   6  410.26   23.50
  -6  -2  -6  383.46   22.20
  -2   6  -6  412.46   22.40
  -2   6  -6  412.06   22.30
  -6   2   6  407.26   21.90
   2   6   6  397.66   22.10
   6   2  -6  420.86   23.40
   6   3   6   77.59    9.10
  -6   3  -6   66.79    6.50
   3  -6   6   62.89    7.50
  -6   3  -6   56.59    8.00
  -6   3  -6   69.09   10.20
   6   3   6   71.59    9.10
  -3   6   6   82.69    9.30
  -3  -6  -6   58.99    7.50
  -3   6   6   76.59    7.00
   3   6  -6   67.69    8.20
  -3  -6  -6   79.39    8.90
   6  -3  -6   85.99   11.10
   3   6  -6   73.89    8.20
   6  -3  -6   71.09    7.60
  -3   6   6   64.29    8.50
  -3   6   6   69.59    7.10
   3  -6   6   62.39    8.30
  -6  -3   6   92.09    9.80
   6   3   6   72.49    8.10
   6  -3  -6   81.99    8.40
  -6  -3   6   63.19    7.90
  -3   6   6   68.69    8.40
  -6  -3   6   80.39    7.80
  -3   6  -6   65.69    8.20
  -6   3   6   82.69    8.20
  -3  -6   6   79.29    7.90
   3  -6  -6   99.39   10.50
   3   6   6   74.89    5.80
   6  -3   6   60.69    9.20
  -6  -3  -6   77.19    7.70
  -6   3   6   71.99    8.60
  -6   3   6   83.19   10.30
   6   3  -6   90.99    8.90
   6   3  -6   85.89    9.80
   3   6   6   79.49    9.40
  -6  -3  -6   84.29    9.60
  -6  -3  -6   64.49    8.00
  -3  -6   6   60.09    7.40
   6   3  -6   71.69    8.00
   3   6   6   67.69    5.50
   6  -3   6   72.19    9.10
  -3   6  -6   55.19    8.20
   3   6   6   67.29    8.10
   6  -3   6   75.29    6.60
   4   6  -6   59.39    7.40
  -4  -6  -6   49.40    7.50
   6  -4  -6   55.19    7.40
   6  -4  -6   62.49    7.10
  -4  -6  -6   55.39    9.00
  -6  -4   6   64.79    6.80
   6   4   6   60.39    9.30
  -6   4  -6   63.19    8.70
   6  -4  -6   62.79   10.30
  -6   4  -6   64.89    9.50
   6   4   6   58.79    7.00
  -4   6   6   61.69    8.90
  -4   6   6   66.89    8.60
  -6  -4   6   60.39    6.50
   4  -6   6   49.60    7.30
  -6  -4   6   63.89    8.60
  -6  -4   6   55.79    7.40
  -4   6   6   56.19    8.20
   4   6  -6   60.59    8.40
  -6   4  -6   59.59    5.60
   6   4   6   65.09    8.20
   4  -6   6   62.59    9.10
   6  -4   6   69.89    8.90
   4   6   6   58.69    5.00
   4   6   6   54.49    5.10
   4  -6  -6   60.59    9.10
  -4  -6   6   60.29    7.60
   4   6   6   47.70    7.20
   6   4  -6   60.39    8.80
   6  -4   6   59.59    5.40
   6  -4   6   70.69   10.50
  -4   6  -6   76.09    9.40
  -6   4   6   68.99    9.50
  -4  -6   6   57.89    7.50
  -6   4   6   62.99    7.40
   4  -6  -6   65.49    6.60
  -6   4   6   61.29    8.20
  -4   6  -6   57.09    8.70
  -6  -4  -6   54.99    7.90
  -6  -4  -6   63.39    6.70
   4   6   6   50.99    8.50
   6   4  -6   61.99    7.30
  -6  -4  -6   60.69    8.20
  -5  -6  -6   28.30    7.20
   5  -6   6   29.20    6.40
  -5   6   6   20.20    7.20
   5   6  -6   34.00    7.90
  -6  -5   6   26.70    6.30
  -5  -6  -6   38.60    4.00
   5   6  -6   33.50    6.70
  -5  -6  -6   37.40    7.20
  -5   6   6   45.20    8.20
   6   5   6   24.70    7.20
   5  -6   6   41.40    8.40
   6  -5  -6   30.90    6.50
  -6  -5   6   40.20    4.80
  -6  -5   6   32.60    6.50
  -6   5  -6   26.90    7.10
   6   5   6   34.20    5.40
   6  -5  -6   24.10    8.10
  -6   5  -6   33.20    3.40
  -6   5  -6   36.80    8.80
   6  -5  -6   35.80    5.70
   6   5   6   34.70    7.30
  -5   6   6   34.90    5.30
  -6  -5   6   35.20    4.50
   6  -5   6   30.10    3.10
  -6  -5  -6   29.60    4.60
  -6   5   6   34.00    7.10
   5  -6  -6   24.90    4.80
   5   6   6   41.80    8.60
  -6  -5  -6   25.90    6.80
   6   5  -6   23.30    6.00
   5  -6  -6   20.10    7.60
   5  -6  -6   20.90    5.30
   6   5  -6   24.40    7.30
  -6  -5  -6   30.30    6.90
  -5   6  -6   20.20    6.70
   5   6   6   26.30    6.70
   6  -5   6   31.30    6.90
  -5  -6   6   21.60    6.10
  -6   5   6   42.50    8.90
   5   6   6   27.40    3.90
  -5   6  -6   25.00    7.80
   6  -5   6   33.90    8.60
  -5  -6   6   20.70    5.90
  -6   5   6   26.00    5.20
  -6  -6   6  197.18    9.30
   6   6   6  192.68   11.40
   6   6   6  187.88   16.80
  -6  -6   6  186.28    9.20
  -6   6   6  172.38   12.30
   6   6  -6  191.38   14.40
   6   6  -6  208.98   16.90
  -6  -6  -6  204.08   10.90
   6  -6  -6  177.18   18.20
   6  -6  -6  197.38   12.50
  -6  -6   6  172.38   14.50
  -6  -6  -6  196.48   15.30
   6  -6  -6  185.98   15.60
  -6   6  -6  179.48   15.70
  -6   6   6  209.18   15.90
   6  -6   6  182.48   16.80
   7   0  -6  775.52   39.90
   0   7   6  758.02   37.60
   0   7  -6  776.62   36.40
   7   0  -6  745.23   37.40
  -7   0  -6  775.42   38.10
   0   7  -6  769.12   38.20
   7   0   6  743.93   38.70
  -7   0   6  749.53   37.90
   0  -7   6  766.82   36.10
   7   0  -6  788.02   39.00
  -7   0  -6  795.12   38.80
  -7   0  -6  794.72   39.70
   7   0   6  742.93   39.60
   0   7  -6  734.63   35.60
   0   7   6  742.63   36.90
   0   7   6  745.73   37.20
   7   0   6  806.72   38.60
  -7   0   6  753.62   38.50
   0   7   6  746.53   38.40
  -7   0   6  863.31   39.90
   0   7  -6  793.02   38.50
   0   7   6  789.02   38.70
   0  -7   6  809.92   35.40
   1   7  -6   56.29    7.80
  -1   7   6   56.99    8.60
  -7   1  -6   44.40    8.00
   7   1   6   42.10    7.70
  -1   7   6   47.10    6.30
   7  -1  -6   54.89    9.10
   1  -7   6   52.19    3.90
   7   1   6   45.20    7.10
  -1  -7  -6   58.09    8.00
  -1   7   6   38.20    6.80
   7  -1  -6   50.79    7.00
   1   7  -6   51.59    6.10
  -1  -7  -6   57.29    7.00
  -7  -1   6   46.60    7.50
  -7  -1   6   49.10    7.10
   7  -1  -6   48.60    7.70
   1  -7   6   50.79    7.20
  -1   7   6   42.40    6.70
  -7   1  -6   56.29    7.30
   1   7  -6   57.19    5.20
  -7   1  -6   44.60    7.50
   7   1   6   46.40    7.80
  -1   7   6   46.90    6.40
   1   7  -6   50.29    7.20
  -1   7  -6   40.90    7.40
   7  -1   6   47.80    7.10
   1  -7  -6   49.00    6.90
  -1   7  -6   57.79    4.20
  -1  -7   6   45.90    5.60
  -7  -1  -6   37.20    6.80
   1   7   6   54.59    5.90
  -1   7  -6   46.30    7.10
   7   1  -6   44.20    6.80
   7  -1   6   35.60    7.60
   7  -1   6   41.70    7.30
   1   7   6   48.60    7.30
   1   7   6   47.00    5.70
   7   1  -6   36.80    7.50
  -7   1   6   62.09    8.00
  -7  -1  -6   44.10    7.20
  -7   1   6   57.29    7.70
  -7   1   6   47.80    7.80
   7   1  -6   39.80    7.60
  -7  -1  -6   44.90    7.60
  -1   7  -6   51.79    6.80
  -1  -7   6   50.49    5.00
  -2  -7  -6  528.35   27.90
  -7  -2   6  510.25   28.00
  -7  -2   6  562.24   28.50
   7   2   6  539.65   29.50
  -7   2  -6  489.75   30.00
  -2   7   6  543.35   28.70
   2   7  -6  516.05   27.40
   7  -2  -6  525.25   27.80
   2  -7   6  516.15   27.70
   7   2   6  507.85   28.70
   7  -2  -6  532.85   28.20
   7   2   6  535.45   28.80
   7  -2  -6  509.25   30.50
  -2   7   6  513.05   30.70
  -2   7   6  545.45   28.20
  -2   7   6  558.64   29.20
  -2  -7  -6  510.45   28.20
  -7   2  -6  498.05   27.00
   2   7  -6  522.55   28.10
  -7  -2   6  510.05   28.90
  -2   7   6  501.35   26.60
  -7   2  -6  521.05   28.90
   2   7   6  544.15   25.50
   7   2  -6  553.04   28.00
  -2   7  -6  534.25   28.60
  -7   2   6  519.85   28.00
  -7  -2  -6  520.55   28.70
  -2  -7   6  557.54   28.40
   7  -2   6  579.64   27.50
   7  -2   6  497.95   30.20
  -2  -7   6  561.44   23.70
  -2  -7   6  543.85   26.90
  -7  -2  -6  541.95   29.20
   7   2  -6  536.35   29.80
  -2   7  -6  573.44   28.80
  -7   2   6  567.54   30.50
   2   7   6  553.14   28.90
   7   2  -6  549.45   29.10
   2   7   6  512.55   25.10
  -7   2   6  542.45   28.50
   2  -7  -6  591.14   29.00
  -2   7  -6  563.74   29.10
   7  -2   6  502.15   28.70
  -7  -2  -6  598.44   28.90
   2   7   6  568.54   28.90
   7  -3  -6  107.99   13.30
   3   7  -6  123.89   11.40
   7   3   6  141.19   12.20
  -7   3  -6  144.39   14.00
  -3   7   6  119.49   11.80
  -3   7   6  124.09    9.50
   7   3   6  119.89   11.30
   7   3   6  132.29   13.10
  -7  -3   6  121.49   11.40
  -7   3  -6  129.29   12.50
  -3   7   6  120.59    9.50
   7  -3  -6  113.49   10.70
  -3  -7  -6  135.09   11.40
   3   7  -6  139.79   11.60
  -7  -3   6  124.39   12.10
  -7  -3   6  126.09   10.70
   3  -7   6  127.79   11.80
  -3   7   6  144.79   12.60
  -3   7   6  119.69   12.30
   7  -3  -6  135.09   11.30
  -7   3  -6  123.59    9.70
  -7  -3  -6  135.69   10.90
  -7   3   6  127.99   10.90
   3   7   6  137.19   12.00
   7  -3   6  126.79   13.70
   7   3  -6  144.69   13.40
  -3  -7   6  125.79   10.40
  -7  -3  -6  134.99   12.30
  -7   3   6  121.19   11.60
   7   3  -6  137.49   11.20
  -7  -3  -6  137.49   12.30
   7  -3   6  147.29   12.40
  -7   3   6  140.29   13.40
   3   7   6  143.89   12.60
   3   7   6  126.49    7.50
  -3   7  -6  144.79   12.20
   7   3  -6  121.49   11.40
   3  -7  -6  133.09   12.40
   3   7   6  127.99    7.40
  -3   7  -6  137.09   12.50
  -3  -7   6  134.99   11.60
  -3   7  -6  140.99   12.60
  -4  -7  -6    1.40    4.80
   7  -4  -6    7.30    4.50
  -7   4  -6    2.40    5.90
  -4   7   6    4.70    5.40
  -4   7   6    0.50    5.00
  -4   7   6    2.90    5.00
  -7   4  -6    6.10    3.50
  -7  -4   6   -0.50    4.90
   7   4   6    4.50    4.50
   7  -4  -6   -1.90    5.90
  -4   7   6    1.00    3.50
  -4  -7  -6    3.40    5.10
   4  -7   6    2.60    4.90
   4   7  -6    7.40    4.90
   7  -4  -6    3.00    4.30
  -7  -4   6    0.50    3.70
  -4   7   6    0.90    3.10
   4  -7   6   -1.80    5.00
   4   7  -6    5.00    5.50
   7   4   6    7.40    6.40
  -4  -7   6    6.20    4.60
  -7   4   6   13.00    5.90
  -4  -7   6   -3.40    4.60
   4  -7  -6   -2.70    5.40
   7   4  -6    5.70    5.00
  -4   7  -6   11.80    6.20
   7   4  -6    7.00    6.20
   7  -4   6    4.90    6.60
   4   7   6    6.90    6.00
  -7   4   6    5.50    4.30
  -7  -4  -6    2.30    5.00
  -7  -4  -6    6.80    4.10
   7   4  -6    7.80    5.40
   7  -4   6    6.70    3.50
   5  -7   6   70.99   10.70
  -7   5  -6   75.89   10.70
   7   5   6   71.99   10.60
  -5  -7  -6   73.49   10.30
   7  -5  -6   84.19    8.70
   7   5   6   71.29   11.30
   7  -5  -6   64.99   11.10
   7  -5  -6   86.19   14.90
  -5   7   6   67.39   10.40
  -7   5  -6   58.99    5.90
   5   7  -6   62.39   12.40
  -5   7   6   68.39    7.10
  -5   7   6   87.99   11.70
  -7  -5   6   71.69    7.50
  -7  -5   6   60.19    8.80
   5   7  -6   62.19    9.60
  -7  -5   6   70.39    7.20
  -5   7   6   63.39    9.10
  -5   7  -6   82.19   10.60
  -7   5   6   69.79    8.00
  -7  -5  -6   60.29    9.30
   5   7   6  105.69   14.90
   7   5  -6   69.79   10.40
   7   5  -6   90.49   10.40
  -7   5   6   71.99   10.10
  -5  -7   6   70.99    9.40
  -5   7  -6   72.89   10.80
   7  -5   6   74.89    6.00
   5  -7  -6   89.19   11.80
  -5  -7   6   71.19    9.50
   7  -5   6   67.19   11.60
  -7  -5  -6   73.99    7.50
   7   6   6  159.28   11.20
  -6  -7  -6  169.28   14.90
   6  -7   6  158.98   16.40
  -7  -6   6  170.08    9.40
  -6   7   6  161.28   11.30
  -7  -6   6  166.28   14.80
   7   6   6  179.68   17.10
   7  -6  -6  176.78   12.30
  -6   7   6  164.68   15.30
   7  -6  -6  166.58   17.50
   6   7  -6  168.38   16.20
  -7   6  -6  168.08   16.00
  -7  -6   6  182.08    9.60
   7   6  -6  177.08   16.80
   7  -6   6  126.19   15.50
   6   7   6  172.98   16.90
  -7   6   6  161.68   15.00
   6  -7  -6  152.48   16.70
  -7  -6  -6  172.68   10.50
  -7  -6  -6  164.38   15.10
   6  -7  -6  176.18   11.70
  -6  -7   6  164.78   14.60
  -7   6   6  156.78   11.70
  -6   7  -6  186.68   16.20
  -7  -7  -6   85.69   11.90
  -7   7   6   70.79   11.10
   7  -7  -6   74.39   13.10
  -7  -7   6   72.69   11.00
   7   7  -6   85.09   13.20
  -7   7  -6   68.79   11.10
   7   7   6   80.99   13.40
   7   7   6   67.39    5.40
  -7   7   6   75.89    7.80
   7  -7  -6   79.69    8.20
   7  -7   6   42.90   10.60
  -8   0   6  143.79   12.90
  -8   0   6  144.49   13.60
   8   0  -6  145.19   13.50
   0   8   6  145.39   11.10
  -8   0  -6  150.28   13.40
   0   8   6  163.88   11.90
   0  -8   6  156.78   10.30
   0   8  -6  148.29   13.40
   0   8   6  141.19   11.10
   0   8   6  149.69   13.10
   0  -8   6  146.89    9.20
   0   8   6  149.59   11.90
   0   8  -6  146.19   10.30
   8   0   6  157.28   13.60
   0   8  -6  140.39   12.60
  -8   0   6  138.09   12.70
  -8   0  -6  154.98   13.90
   0   8  -6  133.99    9.60
   8   0  -6  142.39   14.60
   8   0   6  142.49   14.40
   8   0  -6  145.29   12.00
   0   8   6  158.38   13.90
  -8   1  -6  306.77   20.10
  -1   8   6  276.17   16.40
  -8   1  -6  276.77   17.20
   8   1   6  284.97   18.90
  -1   8   6  275.27   18.30
   8  -1  -6  267.37   17.00
  -8  -1   6  266.67   17.70
  -1   8   6  274.87   17.10
  -1  -8  -6  256.57   17.70
  -1   8   6  279.87   16.20
   8  -1  -6  257.57   17.80
   1  -8   6  274.17   16.10
  -8  -1   6  285.07   18.60
  -8  -1   6  320.17   19.00
   1   8  -6  297.27   18.40
   8  -1  -6  284.27   20.30
   1   8  -6  252.67   15.50
   8   1   6  243.48   18.70
  -1   8   6  295.37   18.80
   1   8  -6  271.17   13.80
  -8   1  -6  252.57   18.10
   1   8  -6  290.77   18.00
   1   8   6  233.08   14.40
  -1   8  -6  269.67   18.10
   8  -1   6  268.17   17.40
   1   8   6  270.37   17.30
   8   1  -6  268.67   19.20
   1   8   6  266.27   15.00
  -1   8  -6  255.07   17.60
  -8   1   6  259.87   19.00
  -1  -8   6  252.17   13.60
   8  -1   6  248.58   19.60
  -8  -1  -6  243.38   18.00
   8   1  -6  281.87   17.20
  -8   1   6  249.28   17.50
   8   1  -6  239.98   18.70
  -8  -1  -6  228.18   17.30
  -8   1   6  267.67   17.70
  -1  -8   6  253.77   14.90
  -1   8  -6  254.67   16.30
   1   8   6  258.37   19.50
  -1   8  -6  229.78   12.70
   8  -2  -6 1012.70   49.20
   8  -2  -6 1036.10   52.39
  -2  -8  -6  936.21   49.10
   2   8  -6  973.10   48.00
  -8  -2   6 1010.00   49.20
   8   2   6 1002.20   50.09
  -8   2  -6  961.00   48.00
   2  -8   6  963.90   48.30
  -8   2  -6 1074.49   58.79
  -2  -8  -6 1060.89   48.90
  -8  -2   6 1096.69   49.90
   8   2   6 1067.99   50.79
   2   8  -6 1051.09   49.30
   8  -2  -6  966.20   48.60
  -2   8   6  993.30   49.40
  -2   8   6 1006.70   47.40
  -2   8   6 1039.30   50.29
  -2   8   6  960.10   47.10
  -8  -2  -6  989.90   49.80
   8  -2   6  905.11   51.09
   8   2  -6 1039.10   48.90
   8  -2   6 1005.80   48.10
  -2  -8   6  987.90   47.30
  -8  -2  -6 1019.50   56.69
  -8  -2  -6 1046.70   49.70
  -2   8  -6 1013.40   49.20
   2   8   6  997.80   49.40
   2   8   6 1004.60   45.40
  -8   2   6 1048.20   49.70
   2   8   6  950.80   45.10
  -2   8  -6 1077.29   50.39
   2  -8  -6 1067.19   49.50
  -2  -8   6  995.80   49.30
   8   2  -6 1081.09   51.39
   8   2  -6  977.60   49.99
  -8   3  -6  751.72   35.10
   3  -8   6  690.23   36.50
   3   8  -6  696.43   36.20
  -3  -8  -6  731.13   36.60
   8   3   6  683.73   36.50
  -3   8   6  678.23   33.90
  -3  -8  -6  665.93   36.60
   8  -3  -6  712.03   36.30
  -8  -3   6  708.23   36.70
   8  -3  -6  737.63   36.10
  -3   8   6  746.43   37.90
   8   3   6  793.22   39.30
  -8  -3   6  763.42   36.30
   8  -3  -6  687.03   39.60
  -8   3  -6  729.83   37.80
  -3  -8   6  687.13   36.60
   3  -8  -6  756.52   37.70
  -3   8  -6  699.43   37.30
  -8  -3  -6  669.63   37.00
  -3  -8   6  665.03   35.00
   8   3  -6  747.83   38.90
   8   3  -6  688.33   36.10
   8  -3   6  640.04   38.90
  -8   3   6  627.24   35.50
   3   8   6  734.43   37.60
  -8  -3  -6  712.03   36.20
  -3   8  -6  751.02   38.10
   8   3  -6  681.93   36.70
   8  -3   6  732.23   34.80
  -8   3   6  700.13   37.00
  -4  -8  -6   98.39   11.50
   8   4   6   86.49   12.10
  -8   4  -6   88.59    8.60
  -4   8   6   86.49   11.60
   4  -8   6   89.39   11.60
  -4   8   6   89.49    8.50
   8  -4  -6   94.19   10.30
   4   8  -6   84.39   10.90
  -8   4  -6   88.39   11.80
  -4   8   6   96.89   12.60
   8  -4  -6   79.69   13.00
  -4   8   6   92.09    8.00
  -8  -4   6   88.49   11.30
  -8  -4   6   99.79    9.70
   8   4   6  104.99   11.00
   8  -4   6   94.69    8.70
  -4  -8   6  100.29   10.80
   8   4  -6   94.29   12.40
  -4  -8   6   93.19   11.40
  -4   8  -6   92.19   12.10
   4   8   6  105.79   12.40
  -4   8  -6   87.19   11.40
   8  -4   6   96.79   13.60
   8   4  -6  106.39   10.70
  -8   4   6   83.29    9.70
   4  -8  -6   92.99   11.70
  -8  -4  -6   76.09   10.30
  -8  -4  -6   97.89    9.90
  -8   5  -6   73.29   11.60
  -8  -5   6   78.19    8.30
   8  -5  -6   72.49    8.80
  -8   5  -6   74.49    7.20
  -8  -5   6   64.99   10.00
   8  -5  -6   67.09   12.40
   8   5   6   82.79   13.00
  -5   8   6   71.29    7.50
  -5   8   6   69.09   11.40
   8   5   6   68.79    9.00
  -5   8   6   77.49    7.40
  -5  -8  -6   72.29   10.70
  -8   5   6   84.79    9.30
   8   5  -6   73.19   11.60
   5  -8  -6   81.49   12.50
  -8   5   6   86.49   11.70
   8  -5   6   64.59   11.70
   8  -5   6   83.69    7.20
  -5  -8   6   67.69   10.60
  -5   8  -6   94.29   12.90
   5   8   6   72.09   10.90
  -8  -5  -6   68.69   10.40
  -8  -5  -6   87.69    8.50
   6   8  -6  117.29   14.20
   8  -6  -6  116.39   10.80
  -6   8   6  120.29    8.90
  -8  -6   6  117.19    8.20
  -6   8   6  100.49   13.10
   8  -6  -6  112.09   16.10
  -8   6  -6  111.99   14.40
  -6  -8  -6  119.99   13.40
   8   6   6  116.79   15.20
   8   6   6   93.89   10.10
  -8  -6   6  112.49   13.10
  -8  -6   6  120.89    8.60
   6  -8   6  110.59   14.40
   8   6  -6  107.49   14.30
   8  -6   6   79.69   13.50
   6  -8  -6  102.39   14.20
  -8  -6  -6  123.49    9.30
   6   8   6  110.79   14.30
  -6   8  -6  114.19   14.30
  -6  -8   6  101.69   12.30
  -8   6   6  106.09   10.10
   8  -6   6  122.39    6.40
  -8   6   6  101.39   12.60
   8   7   6  228.98   12.90
   7   8  -6  245.78   21.20
   7  -8   6  221.98   21.00
  -7   8   6  203.68   14.20
  -8  -7   6  210.28   18.70
  -7   8   6  210.88   19.70
   8  -7  -6  211.88   21.90
   8   7   6  240.48   21.70
   8  -7  -6  263.87   15.50
  -8   7  -6  266.17   21.10
  -7  -8  -6  215.78   19.40
  -7   8   6  215.08   13.80
  -8  -7  -6  244.68   19.70
   7   8   6  267.57   22.00
   8  -7   6  211.68   21.40
  -8  -7  -6  266.27   12.30
  -7   8  -6  239.68   20.40
  -8   7   6  238.08   14.80
  -7  -8   6  218.78   18.90
  -8   7   6  255.67   20.30
   7  -8  -6  204.18   21.10
   8   7  -6  251.47   21.80
   8   8  -6   29.10   11.20
  -8   8  -6   18.20   10.10
  -8  -8   6   22.10    9.10
  -8  -8  -6   23.90   10.00
  -8   8   6   31.10   10.30
   8  -8   6   24.90   10.60
  -8   8   6   24.60    5.10
   8  -8  -6   32.80   12.00
   0   9   6   18.40    5.20
   0   9   6   22.30    5.90
   9   0  -6   24.10    8.70
  -9   0   6   11.50    6.60
  -9   0  -6   15.70    7.30
   0  -9   6   17.90    4.60
   9   0  -6   10.90    6.80
   0   9  -6   26.60    8.30
   0   9  -6   19.60    4.30
  -9   0  -6   10.80    6.00
   0   9   6   16.50    5.80
   0   9  -6   20.50    5.00
   0   9   6    6.80    6.60
   9   0   6   19.40    7.30
   0   9   6   14.70    4.90
   0  -9   6   18.10    3.80
  -9  -1   6  287.27   19.30
  -9   1  -6  256.07   17.60
   1   9  -6  261.27   19.00
   1  -9   6  242.28   15.80
  -1   9   6  263.37   17.30
  -1   9   6  245.78   17.00
   9  -1  -6  247.08   20.50
   1   9  -6  243.48   13.20
  -9  -1   6  243.68   19.30
  -1   9   6  275.37   16.60
  -9   1  -6  267.07   19.30
   9  -1  -6  272.27   18.90
  -1   9   6  276.07   19.80
  -1   9   6  251.67   16.10
   1   9  -6  253.47   15.80
   9   1   6  229.78   19.40
   1   9   6  259.37   14.80
   1   9   6  259.67   17.50
   9   1  -6  262.87   20.20
   9  -1   6  238.38   20.40
  -1   9  -6  274.07   19.30
  -1   9  -6  245.38   12.50
  -9  -1  -6  281.07   19.50
  -1   9  -6  242.88   12.50
  -1  -9   6  263.87   15.10
   1   9   6  269.57   17.80
  -1  -9   6  281.97   13.40
  -9   1   6  258.27   22.10
  -9  -1  -6  265.77   19.30
   1   9   6  253.17   14.50
  -1   9  -6  253.77   16.50
   9  -1   6  280.97   18.50
   9   1  -6  257.47   19.90
   9  -2  -6  289.87   19.90
   9   2   6  283.37   21.50
   2  -9   6  289.77   18.50
  -2  -9  -6  295.47   18.70
   2   9  -6  306.47   18.60
   2   9  -6  311.67   20.90
  -2   9   6  283.87   17.10
  -2  -9  -6  273.57   19.90
  -9   2  -6  296.57   20.90
  -2   9   6  288.57   19.60
  -2   9   6  289.97   21.10
  -9   2  -6  286.37   20.30
  -9  -2   6  295.07   21.70
  -2   9   6  304.57   17.50
  -9  -2   6  342.17   20.70
   9   2   6  252.07   20.20
   9  -2  -6  292.37   22.90
  -2   9  -6  310.67   19.50
   2   9   6  293.07   19.80
  -2   9  -6  311.77   21.30
  -9  -2  -6  306.67   20.80
   2   9   6  301.37   14.50
  -9   2   6  265.97   19.90
   9   2  -6  296.27   21.10
   2   9   6  273.17   14.20
   9  -2   6  319.07   19.30
   9   2  -6  308.87   22.40
  -9   2   6  284.17   19.30
   2  -9  -6  296.07   19.50
  -2  -9   6  288.97   17.30
  -9  -2  -6  297.07   20.10
   9  -2   6  279.77   22.50
  -3   9   6  527.25   31.10
  -9   3  -6  512.65   28.50
   9  -3  -6  557.14   30.00
   9   3   6  498.75   30.50
  -9  -3   6  511.55   30.40
   3   9  -6  544.45   29.90
  -3   9   6  529.05   27.10
   3  -9   6  524.95   30.00
  -3  -9  -6  522.15   30.70
  -3   9   6  555.04   27.60
  -9  -3   6  604.44   30.50
   9  -3  -6  510.15   33.60
  -9   3  -6  521.75   31.50
   9   3   6  572.14   33.00
  -3   9   6  550.64   32.00
  -3   9  -6  543.25   31.80
  -9   3   6  520.95   29.60
  -3  -9   6  519.95   30.80
  -3   9  -6  564.54   31.20
   3   9   6  587.34   31.70
   9   3  -6  559.74   33.20
  -9  -3  -6  552.64   31.50
   9   3  -6  549.15   31.10
   9  -3   6  541.65   33.90
  -9   3   6  563.24   31.10
  -3  -9   6  521.05   30.30
   3  -9  -6  568.64   31.20
  -9  -3  -6  606.04   30.60
   9  -3   6  557.44   28.70
  -9  -4   6   30.60    8.20
   4   9  -6   22.10    7.50
  -9   4  -6   22.40    5.80
   9   4   6   32.90   10.20
  -4   9   6   28.30    5.40
   9  -4  -6   25.20    6.80
  -4  -9  -6   21.70    7.80
  -4   9   6   25.40    9.30
   4  -9   6   19.30    7.50
   9   4   6   27.40    7.60
   9  -4  -6   20.10    9.90
  -9   4  -6   22.90    8.20
  -4   9   6   27.20    4.90
  -9  -4   6   28.10    6.70
  -9  -4  -6   29.30    6.80
  -9   4   6   17.70    7.80
  -4  -9   6   20.20    7.70
   4   9   6   24.50    8.60
   9   4  -6   23.30    7.40
   9   4  -6   19.90    8.60
   9  -4   6   26.80    5.90
   4  -9  -6   25.20    8.20
  -4  -9   6   23.20    7.30
  -4   9  -6   15.20    8.20
  -9  -4  -6   18.10    7.90
   9  -4   6   11.60    8.50
  -9   4   6   32.20    7.20
   9  -5  -6   -2.90    8.20
  -9   5  -6   -2.60    7.20
  -5   9   6    2.80    3.80
  -9  -5   6    4.40    4.60
  -9   5  -6    6.30    4.10
  -9  -5   6    2.50    5.10
   5  -9   6    7.40    7.20
   9   5   6    3.40    8.50
  -5   9   6    5.30    5.80
   5   9  -6   -2.10    6.60
  -5   9   6   12.50    8.20
   9   5   6    8.30    6.10
  -9  -5   6    5.20    7.60
  -5  -9  -6    9.70    7.40
   9  -5  -6    3.50    5.50
   9   5  -6    4.90    8.30
  -9  -5  -6    4.40    7.80
   5  -9  -6    5.30    7.20
  -9  -5  -6    5.70    4.80
  -5   9  -6    6.70    7.80
   9  -5   6    2.30    4.10
  -9   5   6    4.80    4.90
   9  -5   6   -2.00    8.20
  -9   5   6    7.00    7.50
  -5  -9   6    3.20    6.70
   5   9   6    2.30    7.00
  -9  -6   6  123.09   14.80
   6  -9   6   90.29   13.60
  -9   6  -6  128.69   16.10
  -6   9   6  113.09    8.70
   9   6   6  116.79   15.70
  -9  -6   6  134.49   10.10
   9  -6  -6  128.59   17.40
  -6  -9  -6  116.49   13.90
   6   9  -6  132.79   15.30
  -6   9   6  129.09    9.70
  -9   6  -6  132.99    8.50
   9  -6  -6  133.19   12.10
   9   6   6  125.49   11.60
  -6   9   6  154.78   17.00
  -9  -6  -6  117.29   14.50
  -9   6   6  125.49   11.40
  -9  -6  -6  140.69   10.40
   9  -6   6  128.29   16.90
  -9   6   6  108.19   13.90
   6   9   6  132.69   16.10
   9   6  -6  129.79   17.20
   6  -9  -6  119.99   15.30
  -6  -9   6  105.89   13.50
  -6   9  -6   98.29   14.00
   9  -6   6  155.88    8.50
  -7  -9  -6   26.90    9.50
  -9  -7   6   20.70    8.90
  -7   9   6   21.00    4.70
   9  -7  -6   22.10   12.40
  -7   9   6   21.60    9.70
   7   9  -6   18.20    9.70
   9   7   6   30.40   11.80
   9  -7  -6   23.80    6.50
   7  -9   6   21.30   10.00
  -7   9   6   19.70    4.20
  -9   7  -6   28.80   10.60
   9   7   6   21.80    4.80
  -9   7   6   21.50    9.20
  -9  -7  -6   30.90    4.30
   7   9   6   17.30   10.30
  -7  -9   6   20.00    8.80
  -9   7   6   23.30    5.60
   9  -7   6   24.20   13.60
  -7   9  -6   28.30   10.80
   7  -9  -6   21.20   10.80
  -9  -7  -6    9.20    8.20
   9   7  -6   19.80   14.20
   9  -8  -6   39.90    6.50
   9  -8  -6   17.40   11.40
  -9   8  -6   30.30   11.60
  -8   9   6   22.90   10.00
   8  -9   6   26.60   11.60
   9   8   6   31.10   12.50
   8   9  -6   25.70   10.80
  -8   9   6   29.50    6.30
  -8  -9  -6   31.40   10.40
  -9  -8   6   27.50    9.70
   9   8  -6   18.30   11.50
   8   9   6   46.50   13.60
   8  -9  -6   22.00   10.80
  -9  -8  -6   21.50   10.40
  -9   8   6   30.50   11.20
  -8   9  -6   28.50   11.60
  -8  -9   6   36.70   11.20
   9  -8   6   25.80   11.50
   0  10  -6   78.39   11.50
   0  10   6   86.59   10.10
   0 -10   6   82.09    6.90
   0  10   6   80.69    8.80
   0  10  -6   72.39    7.30
   0 -10   6   82.69    8.10
   0  10   6   82.89    8.80
  10   0   6   59.29   10.40
   0  10   6   82.19   12.00
   0  10   6   84.39    9.70
  10   0  -6   86.29   13.90
   0  10  -6   73.39   11.90
 -10   0  -6   64.09   11.00
  10   0   6   96.59   14.50
 -10   0   6  103.29   12.90
  10   0  -6   77.49   12.20
   1  10  -6  256.17   19.30
   1  10  -6  201.88   10.90
 -10  -1   6  226.18   18.30
   1 -10   6  225.48   15.00
  -1  10   6  233.58   19.60
  -1  10   6  234.18   16.00
  10  -1  -6  234.58   18.60
 -10   1  -6  223.08   18.60
  -1  10   6  229.98   16.20
  10   1   6  231.88   19.30
  10  -1  -6  217.58   20.60
   1  10  -6  218.98   14.70
  10   1   6  188.18   19.00
  -1  10   6  225.88   15.50
  -1  10   6  225.58   15.10
   1  10   6  217.28   16.20
   1  10   6  213.78   13.00
   1  10   6  257.57   19.90
  -1  10  -6  235.38   19.00
   1  10   6  216.38   16.60
   1  10   6  202.18   12.60
  10   1  -6  202.18   19.70
  10   1  -6  221.38   19.60
  10  -1   6  282.47   27.90
 -10   1   6  213.38   17.80
 -10  -1  -6  229.58   18.90
  -1  10  -6  224.28   15.30
  10  -1   6  228.48   20.80
  -1 -10   6  215.58   13.60
  10  -2  -6    4.80    6.60
   2 -10   6   -2.30    5.10
  -2  10   6    3.00    4.50
  10  -2  -6    4.20    9.00
  -2 -10  -6   -1.30    6.40
   2  10  -6    2.80    5.40
   2  10  -6   -2.20    7.40
 -10  -2   6   -2.60    6.40
  -2  10   6    7.30    6.80
  -2  10   6   -1.60    7.00
 -10   2  -6   -3.20    6.70
  10   2   6    2.90    7.10
  10   2   6    1.10    7.30
  -2  10   6    4.10    4.80
 -10   2  -6    2.40    5.30
   2  10   6    1.70    6.50
  -2  10  -6   -1.10    7.50
 -10   2   6    2.30    7.20
  10  -2   6   -3.70    5.60
  10   2  -6   -3.80    7.90
  10  -2   6    1.10    8.40
  -2 -10   6   -2.20    3.90
 -10  -2  -6    7.20    7.60
  -2  10  -6    3.80    5.80
 -10   3  -6   68.89   12.10
  -3  10   6   81.79   11.40
  -3  10   6   64.19    7.10
 -10  -3   6   85.79   11.30
   3  10  -6   64.39    9.80
  -3  10   6   67.29    7.70
   3 -10   6   56.49    9.70
  -3  10   6   59.29   11.10
  10  -3  -6   64.69   12.70
  10  -3  -6   65.49   10.10
  -3 -10  -6   66.99   10.90
 -10  -3   6   47.20    9.80
 -10   3  -6   61.29    8.80
  10   3   6   56.29   12.40
  10   3   6   53.89   10.60
 -10  -3  -6   62.89   11.00
  -3  10  -6   89.29   13.50
   3 -10  -6   75.89   11.20
  10   3  -6   69.39   13.60
   3  10   6   69.39   11.30
  10   3  -6   71.69   11.50
  10  -3   6   57.79    8.90
  10  -3   6   74.19   14.10
 -10   3   6   55.09   10.40
  -3 -10   6   56.39    8.30
  -3  10  -6   62.09   10.00
   4 -10   6   19.00    8.20
  10   4   6   30.70   10.10
   4  10  -6   27.00    8.50
 -10   4  -6   33.70    6.80
  10   4   6   33.60    8.70
  -4  10   6   23.50    5.00
  10  -4  -6   28.50   11.50
  -4 -10  -6   23.30    8.50
 -10   4  -6   32.50    9.70
 -10  -4   6   32.50    7.40
  -4  10   6   26.70    9.50
 -10  -4   6   21.00    9.00
 -10  -4  -6   31.20    7.40
 -10  -4  -6   39.50    9.90
 -10   4   6   23.60    9.50
  10  -4   6   29.30    6.70
  10   4  -6   19.60   10.20
   4  10   6   16.30    8.30
   4 -10  -6   10.50    7.70
  -4 -10   6   19.30    8.50
  10   4  -6   27.60    8.40
  -4  10  -6   21.40   10.20
  10  -4   6   22.40   10.40
 -10  -5   6   88.69   13.50
  -5 -10  -6  118.19   18.60
  -5  10   6   96.79    8.00
 -10   5  -6   94.89    9.60
  10   5   6   92.09   17.60
  10  -5  -6   86.69   10.90
 -10  -5   6  112.09   11.80
  -5  10   6  126.99   16.40
  10   5   6   85.19   11.50
 -10  -5   6  102.39   11.00
  -5  10   6   94.09    7.40
   5  10  -6   88.79   13.50
   5 -10   6  120.59   14.70
  10  -5   6  110.49   10.10
   5 -10  -6   87.59   13.10
 -10  -5  -6  117.49   22.00
 -10  -5  -6  102.99   13.50
  -5  10  -6   79.99   14.70
   5  10   6  107.69   15.10
 -10   5   6  102.49   13.90
  10   5  -6  138.79   25.70
  -5 -10   6  101.59   13.80
 -10   6  -6   -2.90    8.80
  -6  10   6    3.00    9.20
  -6  10   6   -2.40    2.50
  10  -6  -6    2.60    5.90
  -6 -10  -6   -0.80    8.40
 -10  -6   6    0.60    8.00
   6 -10   6    5.60    8.50
  10   6   6   -3.70    5.50
   6  10  -6    3.90    8.70
  10  -6  -6    5.30   11.00
 -10  -6   6    0.50    4.60
  10   6   6   -3.00    9.10
 -10  -6   6   -0.20    4.80
   6 -10  -6    1.80    8.00
  10  -6   6   -5.70    9.70
  -6  10  -6   -1.30    9.00
  -6 -10   6   -7.00   12.00
   6  10   6   14.30    9.40
 -10   6   6    7.90    5.20
  10  -6   6   -0.50    3.60
  10   6  -6    7.30    9.80
 -10  -6  -6   -2.60    4.40
 -10  -6  -6   -1.70    8.70
  11   0  -6  505.25   34.50
   0  11   6  525.55   27.50
   0 -11   6  585.14   26.40
   0  11   6  537.35   33.60
   0  11  -6  610.24   33.90
   0  11  -6  482.15   25.70
   0  11   6  517.95   27.70
   0  11   6  554.64   29.90
   0  11  -6  511.55   25.80
   0  11   6  544.05   29.20
 -11   0  -6  546.55   33.00
  11   0   6  491.35   34.10
  11   0  -6  576.94   33.70
 -11   0   6  545.85   32.20
  11   0   6  561.44   32.90
   0  11  -6  525.95   26.30
   1  11  -6  218.98   14.80
  -1  11   6  218.58   15.70
  -1  11   6  242.58   21.20
  11   1   6  213.48   20.70
 -11   1  -6  219.28   19.80
  11  -1  -6  202.48   21.80
 -11  -1   6  204.78   19.00
   1 -11   6  232.38   15.10
  11  -1  -6  238.18   19.90
  -1  11   6  223.28   16.20
  -1  11   6  208.98   15.00
  -1  11   6  226.08   16.10
  11   1   6  221.78   20.40
   1  11  -6  241.18   20.40
   1  11   6  196.88   11.70
  -1 -11   6  226.38   13.60
 -11  -1  -6  211.38   19.60
 -11   1   6  239.18   19.60
   1  11   6  211.98   17.30
  11   1  -6  202.08   20.90
  -1  11  -6  197.68   14.70
  11   1  -6  208.98   20.70
   1  11   6  221.78   18.30
   1  11   6  208.68   12.00
   1  11   6  235.38   20.90
  11  -1   6  201.18   21.70
  11  -1   6  234.38   19.20
  -1  11  -6  230.38   20.40
  11  -2  -6   -3.70    9.70
   2  11  -6   12.40    6.50
  -2  11   6   12.20    8.70
  11   2   6   13.90    9.10
  -2  11   6    9.80    6.80
  11  -2  -6    7.90    7.50
   2  11  -6   13.90    9.30
  -2  11   6   14.20    6.50
  11   2   6    7.50    9.00
  -2  11   6    8.90    4.70
   2 -11   6    7.50    6.00
 -11  -2   6    6.30    8.20
  -2  11   6   13.90    5.30
  11   2  -6    6.50    8.30
  11  -2   6   12.90    7.40
 -11   2   6    1.40    7.60
   2  11   6    7.60    7.50
  11  -2   6   14.70   10.60
  11   2  -6   -5.90    8.00
  -2  11  -6    7.80    9.50
 -11  -2  -6    2.00   12.20
  -3 -11  -6  162.78   17.10
   3 -11   6  159.38   14.80
 -11   3  -6  151.98   17.70
  11   3   6  118.99   16.50
   3  11  -6  146.39   15.10
   3  11  -6  132.79   16.40
  11  -3  -6  169.78   15.90
  11   3   6  137.79   16.30
  -3  11   6  141.89   27.70
 -11  -3   6  172.08   17.60
  -3  11   6  157.08   11.10
  -3  11   6  149.29   10.40
 -11  -3  -6  127.79   16.10
  11  -3   6  100.59   19.80
 -11   3   6  140.19   15.50
  11   3  -6  160.28   20.70
  -3  11  -6  161.58   19.30
   3  11   6  143.49   15.90
  11   3  -6  153.38   16.80
 -11   4  -6   24.50    6.40
  11  -4  -6   15.10    7.40
  -4 -11  -6    2.60    8.00
  -4  11   6   18.50    4.20
   4  11  -6   10.60    8.30
   4 -11   6   18.00    8.00
 -11   4  -6   13.90    9.10
  11   4   6   24.10   11.10
  11  -4  -6   10.80   10.80
  -4  11   6   21.00   10.50
  11   4   6   16.40    8.20
 -11  -4   6   11.90    8.50
 -11  -4  -6   19.50    9.90
  -4 -11   6   18.10    9.30
  11  -4   6   14.50    6.50
   4 -11  -6   13.40    8.60
  -4  11  -6   10.00    9.80
  11  -4   6   20.10   11.50
  11   4  -6   18.30   11.50
 -11   4   6   19.90   10.10
   4  11   6   19.50    9.30
   5 -11   6   81.59   12.70
  11   5   6   76.09   11.60
  -5  11   6   87.79   14.80
 -11  -5   6   66.59   12.70
 -11   5  -6   90.89   16.00
  11  -5  -6   75.79   16.90
  11   5   6   85.59   14.50
   5  11  -6   81.79   13.20
  11  -5  -6   83.69   11.20
  -5 -11  -6   64.09   13.70
 -11  -5   6   91.79   11.20
   5  11   6   83.59   14.00
 -11   5   6   81.19   13.60
  11  -5   6   88.99   16.80
  -5  11  -6   84.39   14.40
 -11  -5  -6   68.39   13.90
  -5 -11   6  105.19   14.80
  11   5  -6   87.59   16.20
   5 -11  -6   89.79   13.70
  11  -5   6  101.19    9.90
  12   0  -6   36.60   12.40
   0  12  -6   42.30   12.10
 -12   0   6   22.60   10.10
  12   0   6   45.20   11.20
 -12   0  -6   23.90   10.80
   0  12   6   37.70    8.10
   0  12   6   32.00   11.20
  12   0  -6   36.10   12.40
  -1  12   6   44.30   12.40
 -12   1  -6   42.30   12.30
  -1  12   6   52.89    8.20
  12  -1  -6   58.09   12.50
   1  12  -6   49.10   12.80
  12   1   6   63.59   13.50
  12  -1  -6   70.39   15.20
   1 -12   6   53.59    7.50
  -1  12   6   45.90    8.00
   1  12  -6   56.19    7.60
 -12  -1   6   42.10   11.00
  12  -1   6   54.89   13.80
  -1  12  -6   56.99   13.20
 -12  -1  -6   35.20   11.10
  12  -1   6   55.09   11.40
   1  12   6   55.99   10.00
   1  12   6   38.70   11.10
  12   1  -6   50.09   12.80
 -12   1   6   38.70   10.50
  12   1  -6   36.10   11.50
   0   0   7    0.70    1.50
   0   0  -7    1.70    1.60
   0   0  -7    0.30    1.30
   0   0  -7    1.30    0.60
   0   0   7    0.30    0.60
   0   0   7   -1.00    1.50
   1   0   7 2165.68  101.69
   0   1   7 2063.99   93.89
   1   0  -7 2035.50  102.79
   0   1   7 2119.69  102.59
  -1   0  -7 2053.39   95.39
   0   1  -7 2182.68   93.79
   0  -1   7 2090.59   93.49
  -1   0   7 2101.69  102.99
   0  -1   7 2027.10   99.99
   1   0   7 2097.29   96.29
   0  -1  -7 2094.09  102.19
   0  -1  -7 2059.69   93.69
   0   1  -7 1965.20   99.69
   1   0   7 2085.89  100.89
   1   1  -7  358.66   18.00
  -1  -1   7  393.16   18.10
   1   1  -7  362.56   17.90
   1  -1   7  354.76   17.10
   1   1   7  377.76   17.20
  -1   1  -7  368.56   17.50
   1  -1   7  376.86   17.50
  -1  -1   7  376.96   18.00
   1   1   7  357.96   18.00
  -1  -1   7  377.76   16.50
  -1   1   7  379.16   16.70
  -1   1   7  373.66   16.70
  -1   1   7  353.16   18.40
   1   1   7  398.46   18.20
  -1   1   7  376.66   18.10
  -1   1  -7  365.46   17.10
   1  -1  -7  363.76   18.00
   1   1   7  341.47   18.00
  -1   1   7  364.26   18.50
   1  -1   7  373.76   18.40
  -1   1  -7  362.66   18.40
  -1  -1  -7  374.26   18.10
  -1  -1  -7  379.86   17.10
   1   1  -7  371.86   16.40
   2   0  -7  415.96   21.10
   0   2  -7  446.36   20.00
   2   0  -7  419.86   19.50
  -2   0   7  434.86   21.40
  -2   0   7  440.46   19.60
   2   0   7  439.86   21.50
   0  -2   7  422.06   20.90
   0  -2  -7  439.46   20.10
   2   0   7  441.06   20.60
   2   0   7  432.46   20.80
   0   2   7  438.36   20.10
  -2   0  -7  437.06   21.40
   0   2   7  430.86   21.10
   0   2   7  452.85   21.10
   0   2  -7  438.56   20.40
  -2   0  -7  428.66   20.40
   0  -2  -7  447.96   21.00
   0   2  -7  444.06   20.10
   0  -2   7  423.56   20.30
   0   2  -7  414.86   20.90
  -2   0  -7  428.86   20.80
  -2   0   7  456.15   21.30
  -2   0   7  432.66   21.40
  -2  -1   7 1973.00   99.39
   1  -2   7 1796.52   91.19
  -1   2   7 1950.60   96.99
   1   2  -7 1911.11   88.79
   2  -1  -7 1876.61   97.39
  -1  -2  -7 1866.71   91.19
   2   1   7 2011.90   93.59
  -1   2   7 1908.11   90.29
  -2   1  -7 1872.11   92.79
  -1   2   7 1932.81   90.99
   2   1   7 2126.99   99.49
   2  -1  -7 1815.72   88.49
  -2  -1   7 1883.31   87.79
   1  -2   7 1951.70   90.59
   1   2  -7 1829.62   96.09
   2   1  -7 1904.11   87.69
  -1   2  -7 1878.51   90.39
  -2  -1  -7 2057.19   98.79
   2  -1   7 1940.61   92.69
  -2   1   7 1946.01   98.39
   2  -1   7 1954.10   93.59
   1  -2  -7 1886.71   96.19
  -2  -1  -7 1861.61   91.99
  -1  -2   7 1893.21   96.09
  -1   2  -7 1871.21   92.19
  -2   1   7 1820.42   88.69
  -1  -2   7 1891.51   89.29
   1   2   7 1998.00   98.99
   2  -1   7 2011.50   93.19
   2   1  -7 1814.82   98.19
   1   2   7 1801.82   91.29
   2   2   7  415.36   21.60
   2  -2  -7  442.66   22.30
  -2  -2   7  449.56   21.50
  -2   2   7  425.66   21.30
   2  -2   7  446.96   20.10
   2   2  -7  464.05   20.30
   2   2   7  433.86   20.90
  -2  -2  -7  461.05   21.80
  -2  -2   7  435.66   20.90
  -2  -2  -7  448.56   21.10
  -2   2  -7  438.36   22.20
   2  -2   7  415.86   22.00
  -2   2  -7  463.25   21.10
  -2  -2  -7  423.46   20.80
   2  -2   7  417.56   20.90
  -2   2   7  435.56   22.10
   2   2  -7  436.36   21.60
  -2   2   7  441.96   20.50
   2  -2   7  448.36   20.10
   2  -2  -7  440.66   20.50
  -2  -2   7  431.26   20.20
   2   2   7  410.56   21.10
   2  -2  -7  414.66   21.20
   3   0  -7  138.39    9.20
  -3   0  -7  145.39    8.60
   0  -3   7  135.19    8.40
  -3   0   7  136.19    7.70
   3   0   7  151.58    8.80
   3   0   7  135.89    9.40
   0   3   7  148.39    8.80
   0   3   7  132.19    8.10
   0   3   7  132.79    8.70
  -3   0   7  135.59    9.00
   0   3  -7  132.59    8.40
  -3   0  -7  133.39    8.50
  -3   0  -7  129.89    9.20
   3   0  -7  140.99    7.60
   0  -3  -7  143.89    8.20
   0   3   7  130.69    8.60
   3   0  -7  131.19    9.30
   0   3  -7  142.09    8.20
   0   3  -7  136.69    8.00
   3   0   7  136.09    8.70
   0   3   7  131.29    8.70
   0   3  -7  136.69    7.80
   0  -3   7  134.69    7.60
  -3   0   7  135.39    9.10
  -1  -3  -7  970.00   44.70
   3   1   7  926.81   45.40
   1  -3   7  951.10   45.50
   3  -1  -7  949.60   46.20
   1  -3   7  965.80   43.70
   1   3  -7  915.51   44.70
  -1   3   7  965.60   44.80
  -3   1  -7  999.20   46.40
   1  -3   7  948.31   44.70
   3   1   7  979.30   45.10
  -1   3   7  949.71   45.70
  -1  -3  -7 1005.90   45.50
  -1  -3  -7  974.60   44.70
  -1   3   7  958.10   45.10
  -3   1  -7  974.00   45.10
   1   3  -7 1010.50   44.50
  -3  -1   7 1003.30   45.90
  -3  -1   7  986.40   45.40
   3  -1  -7  961.00   44.20
  -3  -1   7  949.11   44.10
  -3   1  -7  993.90   44.70
  -1   3   7  922.31   45.60
  -1   3   7 1032.70   44.90
   1   3  -7  922.11   44.50
   3   1   7  965.70   45.70
  -1  -3   7 1007.20   44.80
   3   1  -7 1027.20   44.20
  -1   3  -7 1059.49   45.80
   1   3   7 1035.10   45.10
   1  -3  -7 1020.60   45.10
  -1   3  -7  989.80   43.70
  -3   1   7 1059.19   46.40
   3  -1   7 1066.69   44.80
   1   3   7  979.60   45.60
   3  -1   7 1057.49   45.40
   3   1  -7 1026.70   45.90
  -3   1   7 1015.60   45.60
   3  -1   7 1047.50   46.60
  -3  -1  -7 1016.80   45.70
  -1  -3   7 1001.40   44.60
  -3  -1  -7  961.70   45.40
   1   3   7 1028.40   44.90
  -3  -1  -7 1024.60   45.10
  -1   3  -7 1076.39   45.10
  -1  -3   7 1044.80   44.70
   2  -3   7 1242.68   53.99
   2  -3   7 1196.38   56.69
  -3  -2   7 1220.38   56.29
  -2   3   7 1195.38   55.69
  -3   2  -7 1218.88   54.79
  -3  -2   7 1265.87   55.79
   2   3  -7 1199.78   54.99
   2  -3   7 1221.78   54.09
   3   2   7 1196.68   55.99
   2   3  -7 1279.97   55.19
  -3  -2   7 1228.88   55.69
  -3  -2   7 1188.48   54.99
   2  -3   7 1125.89   55.49
   3  -2  -7 1171.58   55.09
  -3   2  -7 1203.98   55.89
   3   2   7 1291.67   57.19
  -3   2  -7 1289.67   57.39
  -2   3   7 1238.18   55.59
  -2  -3  -7 1248.38   56.49
  -2  -3  -7 1197.08   55.29
   3  -2  -7 1213.48   57.19
   2   3  -7 1171.38   56.09
   3   2   7 1240.68   56.59
   2   3   7 1229.68   56.59
  -2   3  -7 1321.77   57.09
  -2  -3   7 1220.18   55.19
   3   2  -7 1291.57   55.09
  -3  -2  -7 1230.18   55.79
  -2  -3   7 1262.97   55.09
  -3   2   7 1241.18   56.09
   3  -2   7 1388.26   54.99
   3  -2   7 1278.07   57.39
   3  -2   7 1230.08   55.99
  -2   3  -7 1247.48   55.99
  -3  -2  -7 1278.07   56.59
   2   3   7 1291.17   55.89
  -3   2   7 1262.57   57.29
  -2  -3   7 1308.37   56.09
  -3  -2  -7 1265.87   55.89
   3  -3   7  148.99   10.40
  -3   3   7  174.68   11.80
   3   3  -7  181.88    9.90
  -3   3   7  169.18   10.30
   3  -3   7  152.98   11.60
   3   3   7  161.28   11.20
   3  -3  -7  159.88   10.20
  -3  -3   7  162.08    9.80
   3   3   7  164.28   10.20
   3   3   7  182.58   10.70
   3  -3   7  177.68    8.50
   3  -3  -7  164.38   10.00
  -3  -3  -7  155.78    9.80
  -3  -3   7  166.48   10.80
  -3  -3  -7  170.58   11.10
  -3  -3   7  177.08    9.80
  -3  -3  -7  152.48   10.40
   3  -3   7  171.68    8.60
  -3   3   7  164.08   10.40
   3   3  -7  202.18   15.70
   3  -3  -7  176.38   12.10
  -3  -3   7  180.78    9.80
  -3   3  -7  177.48   12.00
  -4   0  -7  196.68   11.80
   0   4   7  212.98   11.90
  -4   0  -7  195.98   12.60
   0   4  -7  192.88   10.60
   4   0   7  214.08   11.90
   4   0  -7  210.28   11.00
   0   4   7  191.18   11.70
  -4   0   7  208.48   12.60
   4   0   7  190.68   12.00
  -4   0   7  203.38   12.30
   0   4  -7  214.88   11.60
  -4   0  -7  195.98   12.00
   0   4  -7  192.08   11.30
   0  -4   7  193.08   10.30
   4   0  -7  182.98   12.50
   0  -4  -7  192.58   11.40
   0  -4   7  197.78   11.40
   4   0   7  200.38   12.80
  -4   0   7  179.98   10.90
   0   4   7  205.48   11.90
   0   4   7  203.48   11.70
   0   4  -7  209.28   11.60
   1  -4   7   71.09    4.50
   4   1   7   84.49    8.30
   4   1   7   75.49    6.90
   1   4  -7   75.79    6.30
  -1  -4  -7   80.09    6.80
   1   4  -7   69.69    5.60
   4  -1  -7   69.59    5.80
   4   1   7   77.39    7.50
   1   4  -7   80.29    6.30
  -4  -1   7   88.09    7.20
  -1   4   7   71.09    6.50
  -1   4   7   72.29    6.50
  -1  -4  -7   73.29    6.50
  -1   4   7   81.19    6.80
  -4   1  -7   71.89    6.20
  -4  -1   7   80.49    7.30
   1  -4   7   68.89    6.70
   4  -1  -7   76.89    7.90
  -1   4   7   65.89    6.90
  -4   1  -7   75.49    7.80
  -4  -1   7   82.09    6.20
   4  -1  -7   68.79    6.90
  -4   1   7   77.79    7.60
  -1  -4   7   77.29    5.80
   1   4   7   83.29    6.20
   1   4   7   80.99    7.20
   4  -1   7   81.09    6.40
  -4  -1  -7   80.29    7.10
  -1  -4   7   83.99    6.60
  -1  -4   7   79.59    6.00
  -1   4  -7   78.09    7.00
   4  -1   7   75.29    7.00
   1   4   7   78.19    6.30
   4   1  -7   84.29    7.40
  -4   1   7   76.09    6.20
  -4   1   7   87.49    7.20
  -1   4  -7   80.99    4.80
  -1   4  -7   74.79    6.50
   4   1  -7   70.89    5.80
  -4  -1  -7   77.09    9.30
   4   1  -7   87.19    7.70
  -1   4  -7   86.19    6.90
   4  -1   7   85.99    8.10
   1   4   7   80.39    6.70
  -4   2  -7  160.88    8.90
   2   4  -7  138.09    8.30
  -2   4   7  144.59    9.70
   4  -2  -7  148.09   10.00
   2  -4   7  152.68    9.80
   4   2   7  160.98   10.20
  -4  -2   7  152.18    9.80
  -2   4   7  163.98   10.00
   2  -4   7  153.78   10.60
   4   2   7  144.79   10.20
  -4  -2   7  152.28    9.20
  -2   4   7  144.39    9.50
   2  -4   7  158.48    6.90
   4  -2  -7  144.99    9.20
   2   4  -7  161.78   10.10
   4   2   7  139.39   10.40
  -4   2  -7  158.08   10.30
   2  -4   7  148.59    6.80
  -4   2  -7  172.48   11.80
  -4  -2   7  140.19   10.20
   4  -2  -7  156.48   11.60
  -2  -4  -7  151.68    9.70
  -2  -4  -7  161.48    9.00
  -2   4   7  145.39   10.60
  -2  -4  -7  158.68   10.40
   4   2  -7  148.19   10.90
  -4  -2  -7  143.79    9.90
  -4  -2  -7  155.78    9.90
   2  -4  -7  142.09   12.10
   4  -2   7  141.99   10.10
   2   4   7  134.89    8.90
   4  -2   7  139.09    8.70
   2   4   7  136.09   10.30
   4  -2   7  124.09   10.90
  -4   2   7  147.29   10.10
   2   4   7  153.48    9.90
  -4   2   7  131.29    9.20
   2  -4  -7  144.49    9.30
  -2  -4   7  138.19    9.30
  -2   4  -7  140.49   10.60
   4   2  -7  145.09    9.00
  -4   2   7  137.99   10.90
  -4  -2  -7  140.29   10.30
  -2   4  -7  154.18   10.20
  -2  -4   7  139.69    8.30
  -4   3  -7  272.27   13.30
   4  -3  -7  263.37   14.60
   3  -4   7  260.37   15.10
  -3   4   7  274.57   15.20
   4   3   7  272.77   15.30
  -4   3  -7  298.27   17.20
   3   4  -7  284.37   14.70
   4  -3  -7  278.97   17.10
  -4  -3   7  290.67   14.50
   3  -4   7  241.28   16.00
  -3   4   7  271.37   14.70
  -4  -3   7  282.07   14.50
  -4   3  -7  275.97   15.60
   4   3   7  267.67   15.00
  -3  -4  -7  268.07   15.20
  -3   4   7  272.57   16.50
   4   3   7  288.37   16.40
  -4  -3   7  263.07   14.60
  -4  -3   7  243.38   15.40
  -3  -4  -7  274.27   15.80
  -3  -4  -7  271.97   13.90
   3   4  -7  275.07   15.80
   4  -3  -7  287.37   15.10
   4   3  -7  259.47   16.10
   4  -3   7  265.47   13.20
  -4   3   7  240.08   16.30
   3  -4  -7  266.07   16.60
   3  -4  -7  259.37   14.50
   3  -4  -7  252.77   14.70
  -3  -4   7  246.78   15.00
   3   4   7  256.37   14.20
   4   3  -7  258.77   14.30
  -4  -3  -7  261.37   14.50
   3   4   7  265.97   15.20
   4  -3   7  263.27   16.70
  -4  -3  -7  247.28   15.00
  -3  -4   7  272.57   13.50
   4  -3   7  248.98   15.20
  -4  -3  -7  260.07   15.90
  -3   4  -7  254.17   15.40
   3   4   7  276.17   16.20
  -3   4  -7  278.37   16.60
  -4   3   7  242.78   14.80
  -3  -4   7  261.97   13.50
   4   4  -7  237.28   15.10
  -4   4  -7  242.68   16.00
  -4   4   7  210.28   13.30
  -4   4   7  236.88   15.70
   4  -4   7  244.78   10.80
   4   4   7  212.28   15.00
   4  -4  -7  247.38   13.90
   4  -4  -7  243.48   13.50
   4   4   7  250.87   14.50
  -4  -4   7  249.97   12.50
   4  -4   7  218.08   15.40
  -4  -4  -7  225.68   12.60
   4  -4   7  233.88   14.40
  -4  -4  -7  218.58   14.70
   4  -4   7  218.48   10.70
   4   4   7  215.18   13.00
  -4  -4   7  214.18   14.20
  -4  -4   7  212.18   13.40
   4   4  -7  238.68   13.50
   4  -4  -7  225.08   15.80
  -4   4  -7  230.98   14.70
  -4  -4   7  238.98   12.40
  -4   4   7  226.78   14.10
  -4  -4  -7  208.28   13.90
   5   0   7 2445.16  115.59
   0   5   7 2506.55  114.29
   0   5  -7 2544.45  113.69
  -5   0  -7 2689.53  114.69
  -5   0   7 2693.73  115.69
   5   0   7 2551.94  114.89
  -5   0  -7 2681.83  115.89
   0   5  -7 2606.24  114.19
  -1   5   7 1084.09   50.99
  -1   5   7 1065.69   49.90
  -1   5   7 1104.49   50.19
   5   1   7 1055.89   50.29
  -1  -5  -7 1061.79   49.80
   5  -1  -7 1054.09   49.20
   1  -5   7 1040.10   47.20
  -5   1  -7 1055.89   50.19
  -5   1  -7 1151.38   51.79
  -1  -5  -7 1050.99   49.80
   1   5  -7 1032.30   49.10
  -5  -1   7 1072.69   50.59
   5  -1  -7 1044.70   50.19
  -5   1  -7 1015.50   50.59
  -1   5   7 1062.59   50.29
   5  -1  -7 1043.50   51.59
  -1   5   7 1052.89   49.50
   1  -5   7 1029.20   49.60
   1   5  -7 1155.48   49.80
   5   1   7 1028.20   50.29
   1   5  -7 1029.60   48.30
  -5  -1   7 1156.48   50.79
  -5  -1   7 1045.30   49.30
   5   1   7 1073.69   50.89
   5  -1   7 1053.09   51.49
   5   1  -7 1126.59   49.30
  -5   1   7 1054.79   50.29
   1   5   7 1084.79   50.29
   5  -1   7 1114.59   49.60
   5   1  -7 1085.89   50.89
  -5   1   7 1096.19   49.70
  -5  -1  -7 1117.49   50.49
  -1   5  -7 1118.49   50.09
  -1   5  -7 1139.39   50.19
  -1   5  -7 1039.60   47.30
  -5   1   7 1114.59   51.39
   1   5   7 1088.29   49.00
  -5  -1  -7 1097.09   50.69
   1   5   7 1086.39   49.30
   1   5   7 1094.39   49.90
  -1   5  -7 1145.39   50.09
  -1  -5   7 1071.79   48.70
  -5  -1  -7 1069.09   50.09
  -1  -5   7 1084.29   49.80
  -1  -5   7 1074.49   48.50
   5   1  -7 1103.09   51.09
   5  -1   7 1111.49   50.59
   2   5  -7  390.26   19.80
  -5   2  -7  380.96   19.10
  -5  -2   7  384.46   20.90
  -5  -2   7  357.46   19.50
  -2   5   7  396.76   20.50
   5  -2  -7  380.56   19.60
  -2  -5  -7  392.76   20.60
   2   5  -7  375.96   20.20
   5  -2  -7  398.66   20.40
  -2   5   7  369.06   20.90
  -5  -2   7  408.36   20.40
   5   2   7  407.66   21.40
   5  -2  -7  360.36   21.90
   2  -5   7  376.06   20.60
   5   2   7  393.66   20.60
  -2   5   7  397.16   20.90
  -2   5   7  393.56   20.40
  -5   2  -7  408.16   22.30
   2   5  -7  337.47   17.90
   2  -5   7  388.06   20.20
  -5   2  -7  383.56   20.80
  -2  -5  -7  371.46   20.00
  -2   5   7  380.36   19.60
   2   5   7  378.66   20.90
   5   2  -7  372.86   20.50
  -2  -5   7  356.16   19.70
  -5   2   7  363.56   19.80
  -2  -5   7  377.96   18.00
  -5   2   7  390.76   20.40
   5  -2   7  366.66   21.90
  -5  -2  -7  386.66   20.50
   2   5   7  372.36   18.80
  -5  -2  -7  373.26   20.20
   2  -5  -7  398.66   21.20
   5   2  -7  373.96   19.40
  -5  -2  -7  350.66   20.60
   5   2  -7  382.26   21.40
  -2   5  -7  373.86   20.90
   2   5   7  376.96   20.30
   2   5   7  354.86   18.90
  -2  -5   7  361.06   19.40
  -2   5  -7  373.06   20.50
   5  -2   7  384.06   19.20
   5  -2   7  341.47   20.30
  -5   2   7  381.56   21.80
   5  -3  -7  189.98   15.00
  -5   3  -7  189.18   11.30
   3   5  -7  205.48   12.80
  -5  -3   7  220.98   12.70
  -3   5   7  213.48   13.60
   5  -3  -7  197.78   12.80
   5   3   7  193.18   12.90
  -3   5   7  194.78   14.30
   3  -5   7  206.18   14.30
  -5   3  -7  203.68   15.10
  -3   5   7  200.78   13.30
  -3  -5  -7  224.38   11.50
  -3  -5  -7  191.38   13.10
  -5  -3   7  219.28   12.70
  -3  -5  -7  216.08   13.90
  -5  -3   7  216.48   13.00
  -5  -3   7  204.08   13.90
   5   3   7  216.98   13.70
   3   5  -7  212.58   13.70
   5  -3  -7  219.88   13.20
   5   3   7  195.78   14.30
  -5   3  -7  211.28   14.00
   3  -5   7  187.18   13.10
  -3  -5   7  204.28   13.00
   3  -5  -7  203.38   14.50
  -5  -3  -7  188.08   13.30
   3  -5  -7  217.08   12.40
   3   5   7  208.88   13.40
   3   5   7  208.38   14.30
  -5  -3  -7  198.28   14.00
  -5   3   7  208.18   13.20
   3   5   7  210.88   11.70
  -3   5  -7  217.48   14.70
  -3   5  -7  193.38   13.70
  -3  -5   7  214.98   10.70
   5   3  -7  206.28   12.60
  -3  -5   7  222.28   10.80
   5  -3   7  226.98   14.00
   5  -3   7  213.88   15.30
   5   3  -7  199.08   14.40
   5  -3   7  208.88   11.40
  -5   3   7  218.98   15.10
  -5  -3  -7  207.18   13.70
  -3  -5   7  212.68   13.10
  -5   3   7  200.58   13.00
   4   5  -7  323.67   17.90
  -4  -5  -7  330.17   16.20
  -5  -4   7  351.56   16.90
   4   5  -7  305.07   19.10
  -4  -5  -7  317.67   19.10
   5  -4  -7  355.56   18.00
  -4  -5  -7  305.27   18.40
  -5   4  -7  323.37   15.50
  -4   5   7  304.17   17.20
   5   4   7  330.57   19.90
   5  -4  -7  325.67   18.10
  -4   5   7  310.27   18.60
  -5   4  -7  331.17   20.60
  -5   4  -7  324.47   19.10
   5  -4  -7  295.07   20.30
  -5  -4   7  315.27   18.90
   4  -5   7  297.17   18.40
  -5  -4   7  312.67   17.90
   5   4   7  333.77   18.70
  -4   5   7  326.17   20.10
   5   4   7  304.47   17.40
   4  -5   7  276.77   19.30
  -5  -4   7  353.66   16.90
   4  -5  -7  312.57   17.10
   4  -5  -7  318.87   18.10
   4   5   7  303.17   18.40
  -5   4   7  326.07   17.80
  -4  -5   7  304.27   17.90
  -5  -4  -7  285.07   18.80
   5  -4   7  317.57   20.30
   4   5   7  330.17   19.70
  -4   5  -7  306.87   18.90
   5  -4   7  293.67   18.60
  -4  -5   7  293.27   18.20
   5   4  -7  329.77   17.90
  -4  -5   7  337.47   15.60
  -4   5  -7  326.67   20.20
  -4  -5   7  326.97   15.50
  -5  -4  -7  332.37   18.80
  -5   4   7  309.07   18.30
  -5   4   7  311.17   20.00
   5  -4   7  318.97   15.30
   4   5   7  302.57   16.50
   4  -5  -7  339.87   20.60
   5   4  -7  328.67   19.80
  -5  -4  -7  319.47   17.00
  -5   5  -7  115.09   11.50
  -5  -5   7   90.59    6.70
   5   5   7  104.29   10.10
   5   5   7   89.09    7.80
   5  -5  -7   91.59   11.30
   5   5   7   73.59    9.70
  -5   5   7   79.89   12.60
  -5  -5   7  103.59   10.10
  -5  -5  -7   88.69    9.70
  -5   5   7  113.79   10.30
  -5   5   7   90.99    8.50
   5  -5  -7   94.69    8.50
   5   5  -7  108.99   11.70
  -5  -5   7   81.29    8.70
   5   5  -7  108.39    9.50
   5  -5   7   94.89    9.80
   5  -5   7   85.99   10.90
  -5  -5  -7   96.39    7.30
   5  -5  -7   86.99    9.00
  -5  -5  -7   85.09    9.70
  -5  -5   7  102.69    6.80
   0   6  -7   62.69    7.20
  -6   0   7   70.89    8.60
   0   6   7   70.39    7.40
   0   6   7   85.59    8.30
  -6   0   7   84.79    9.20
   0   6   7   66.89    7.20
   0   6  -7   63.09    5.70
   6   0   7   71.89    9.20
  -6   0  -7   79.59    8.80
  -6   0  -7   67.19    8.20
  -6   0   7   65.49    7.10
   6   0  -7   77.79    9.00
   6   0  -7   75.19    7.50
   0  -6   7   63.29    5.50
   0   6   7   65.19    7.10
   0  -6   7   70.49    6.50
   6   0   7   76.19    8.40
   0   6  -7   63.19    6.60
   0  -6  -7   63.79    7.30
   6   0   7   59.89    8.20
   0   6   7   68.59    7.60
   0   6  -7   67.89    7.80
  -6   0  -7   77.59    7.90
   6   0  -7   47.60    7.80
   1   6  -7 1960.60   83.79
   6  -1  -7 1882.41   83.19
  -1   6   7 1936.91   84.49
  -6   1  -7 1791.72   84.19
  -6   1  -7 1969.60   85.89
  -1   6   7 1853.21   83.19
   1  -6   7 1887.51   80.59
   6   1   7 1822.12   84.89
   6  -1  -7 1777.92   83.99
  -1   6   7 1874.71   84.09
  -1  -6  -7 1892.11   83.89
  -6  -1   7 1781.42   84.49
  -6  -1   7 1950.50   84.59
  -6   1  -7 1822.32   83.29
   1  -6   7 1795.22   83.09
   1   6  -7 1834.22   82.69
  -1  -6  -7 1916.41   83.69
   1   6  -7 1798.22   81.69
   6  -1  -7 1763.32   85.59
   6   1   7 1883.11   84.49
  -6  -1   7 1857.01   83.39
  -1   6   7 1942.31   84.19
  -1   6   7 1923.61   83.69
   6   1   7 1798.82   84.39
  -1  -6   7 1816.62   81.59
  -1  -6   7 1780.62   82.09
  -1   6  -7 1731.73   80.59
  -6  -1  -7 1799.72   84.09
   6  -1   7 1934.61   83.49
  -6   1   7 1754.62   83.99
   1   6   7 1874.61   83.99
   1   6   7 1782.92   82.39
   6  -1   7 1826.82   84.39
   6  -1   7 1788.02   85.49
  -1   6  -7 1946.11   83.99
   1   6   7 1814.32   82.69
  -6  -1  -7 1857.31   84.19
  -1   6  -7 1854.11   83.59
  -6   1   7 1966.60   85.59
  -6  -1  -7 1869.91   84.69
  -1   6  -7 1973.30   84.29
   6   1  -7 1891.91   83.19
   6   1  -7 1929.81   85.19
   1   6   7 1848.92   84.09
  -6   1   7 1860.01   83.59
   6   1  -7 1806.32   84.89
  -6   2  -7  234.58   13.50
   2   6  -7  210.68   11.30
   6  -2  -7  226.78   14.50
  -2   6   7  232.58   14.90
  -6   2  -7  232.08   15.20
   2   6  -7  229.68   14.10
   2  -6   7  218.78   14.30
   6   2   7  217.48   14.70
  -2  -6  -7  196.08   14.00
  -2  -6  -7  239.18   14.50
  -6  -2   7  221.38   15.00
  -2   6   7  224.18   13.60
  -2   6   7  229.48   13.60
   2   6  -7  224.68   14.00
   6   2   7  209.98   14.80
  -2   6   7  224.98   15.10
  -6   2  -7  237.68   16.50
   6  -2  -7  229.58   16.60
  -6  -2   7  236.78   14.40
  -2   6   7  217.88   14.50
   6   2   7  229.88   15.60
   6  -2  -7  226.98   13.80
  -6  -2   7  234.08   14.10
   2   6   7  201.88   12.20
   2   6   7  211.38   12.60
  -2  -6   7  211.48   13.10
  -6  -2  -7  208.38   14.60
   6   2  -7  239.98   16.00
  -6  -2  -7  228.98   15.00
  -2  -6   7  223.48   11.30
  -2   6  -7  242.58   15.10
  -6  -2  -7  206.68   14.30
  -2   6  -7  219.98   14.80
   6  -2   7  222.18   13.30
   2   6   7  240.58   15.20
   6  -2   7  220.08   14.90
   6   2  -7  242.38   14.00
  -6   2   7  197.98   14.00
   2   6   7  232.08   14.60
   6   2  -7  214.08   14.80
  -2  -6   7  226.38   14.30
   2  -6  -7  225.88   15.00
  -6   2   7  218.08   15.80
  -2   6  -7  230.38   14.70
   6  -2   7  232.28   16.50
  -6   2   7  223.18   14.40
   3  -6   7  158.08   12.10
   6   3   7  190.58   13.20
  -3   6   7  176.98   11.30
  -3   6   7  180.28   13.00
   3   6  -7  181.78   12.20
   6  -3  -7  171.68   14.70
  -6   3  -7  186.18   13.50
  -3  -6  -7  156.68   12.10
   6   3   7  153.48   12.10
  -3   6   7  181.18   13.60
   6  -3  -7  155.98   11.90
  -3   6   7  164.98   11.10
   3  -6   7  162.78   12.90
   6  -3  -7  167.08   11.90
  -6  -3   7  183.88   11.70
   3   6  -7  161.58   12.40
  -6   3  -7  194.28   16.80
  -6  -3   7  166.98   12.10
  -3   6   7  177.48   12.80
   6   3   7  191.48   14.20
  -3  -6  -7  159.38   12.40
  -6  -3   7  168.88   14.30
  -6   3  -7  181.28   10.70
  -6   3   7  150.78   11.80
   3   6   7  180.48   12.70
  -3  -6   7  170.68   12.40
   6  -3   7  164.78   12.90
[truncated: 855,473 more chars]
